# Supplementary material
Source: PubMed Central journal article supplement (PMC4722952)
Supplement: NIHMS742517-supplement-2.pdf [file NIHMS742517-supplement-2.pdf]

**Supplementary Table 1: 27 Phenotypes from ACTG**  
 (Source: <http://ofid.oxfordjournals.org/content/2/1/ofu113/T2.ex>)

| Phenotypes                           | Sample Size | Median | Min  | Max  | Transformation |
|--------------------------------------|-------------|--------|------|------|----------------|
| Absolute basophil count <sup>b</sup> | 2739        | –      | –    | –    | Binary         |
| Absolute eosinophil count            | 2809        | 2.06   | 0    | 3.51 | Natural log    |
| Absolute lymphocyte count            | 2847        | 3.13   | 0    | 4.83 | Natural log    |
| Absolute monocyte count              | 2823        | 2.6    | 0    | 4.36 | Natural log    |
| Absolute neutrophil count            | 2957        | 3.32   | 2.54 | 4.03 | Natural log    |
| ALT                                  | 2960        | 1.51   | 0.3  | 2.29 | Natural log    |
| alkaline Phosphatase                 | 2966        | 1.89   | 0.78 | 2.72 | Natural log    |
| AST                                  | 2964        | 1.48   | 1.04 | 2.27 | Natural log    |
| Blood urea nitrogen                  | 2954        | 1.11   | 0.2  | 2.17 | Natural log    |
| Carbon dioxide/bicarbonate           | 2664        | 26     | 12   | 35   |                |
| CD4 T-cell count <sup>b</sup>        | 3286        | 224    | 0    | 1336 | Square root    |
| CD8 T-cell count                     | 3286        | 2.88   | 1.54 | 3.76 | Natural log    |
| Chloride                             | 2773        | 103    | 89   | 116  |                |
| Creatinine                           | 2986        | 0.9    | 0    | 2.5  |                |
| Glucose (fasting)                    | 1761        | 1.93   | 1.53 | 2.64 | Natural log    |
| Triglycerides (fasting)              | 2023        | 2.06   | 1.11 | 3.45 | Natural log    |
| Glucose (nonfasting)                 | 1175        | 1.93   | 1.48 | 2.6  | Natural log    |
| Hematocrit                           | 3010        | 40     | 18   | 57.5 |                |
| Hemoglobin                           | 3026        | 13.9   | 6    | 20   |                |
| HDL-C                                | 2456        | 1.56   | 0.7  | 2.17 | Natural log    |
| LDL-C                                | 2235        | 94     | 12   | 262  |                |
| Platelet count                       | 3000        | 202    | 36   | 648  |                |
| Potassium                            | 2773        | 4.1    | 2.2  | 5.7  |                |
| HIV-1 RNA                            | 3269        | 4.61   | 0.95 | 7.27 | Natural log    |
| Sodium                               | 2776        | 139    | 127  | 151  |                |
| Total bilirubin                      | 2925        | 0.5    | 0.1  | 2.3  |                |
| Total cholesterol                    | 2852        | 158    | 6    | 350  |                |

**Table 2. Samples used in the Discovery and Replication dataset along with gender, age and square root of CD4 cell count distribution in samples.**

|            |         | Discovery Dataset |  | Replication Dataset |  |
|------------|---------|-------------------|--|---------------------|--|
| ACTG Phase |         | Phase I and II    |  | Phase III           |  |
| #Samples   |         | 1623              |  | 1184                |  |
| Sex        | Male    | 1318              |  | 1001                |  |
|            | Female  | 305               |  | 183                 |  |
| Age        | Minimum | 17                |  | 18                  |  |
|            | Median  | 37                |  | 38                  |  |
|            | Mean    | 37.94             |  | 38.31               |  |
|            | Maximum | 77                |  | 70                  |  |
|            | Minimum | 0                 |  | 0                   |  |
| CD4_Sqrt   | Median  | 15.03             |  | 14.66               |  |
|            | Mean    | 13.8              |  | 13.91               |  |
|            | Maximum | 32.43             |  | 32.41               |  |

**Table 3: Replicated Results after Bonferroni Correction**

| Phenotype    | SNP_1       | State_1 | Gene_1 | SNP_2       | State_2 | Gene_2      | Discovery_pval | Discovery_bonf_pval | Discovery_FDR_pval | Replication_pval | Replication_bonf_pval | Replication_FDR_pval |
|--------------|-------------|---------|--------|-------------|---------|-------------|----------------|---------------------|--------------------|------------------|-----------------------|----------------------|
| phe.Fasting_ | rs111576333 | S5      | TMEM64 | rs73392640  | S8      | POLR3B      | 1.29E-10       | 0.00525587          | 1.64E-07           | 1.65E-14         | 6.72E-07              | 1.38E-10             |
| phe.Fasting_ | rs112009962 | S8      | NA     | rs139070959 | S8      | RPN2        | 8.65E-18       | 3.53E-10            | 8.93E-14           | 6.23E-15         | 2.54E-07              | 5.64E-11             |
| phe.Fasting_ | rs112009962 | S8      | NA     | rs145412529 | S8      | "RBL1,RPS3A | 5.02E-18       | 2.05E-10            | 6.85E-14           | 8.03E-12         | 0.000326894           | 3.03E-08             |
| phe.Fasting_ | rs112027720 | S7      | DIAPH1 | rs115787552 | S5      | KPNA3       | 2.97E-15       | 1.21E-07            | 8.14E-12           | 1.18E-13         | 4.80E-06              | 7.06E-10             |
| phe.Fasting_ | rs112027720 | S7      | DIAPH1 | rs115888477 | S8      | NA          | 2.03E-14       | 8.28E-07            | 5.02E-11           | 2.21E-14         | 8.99E-07              | 1.73E-10             |
| phe.Fasting_ | rs112027720 | S7      | DIAPH1 | rs116011837 | S9      | BRD2        | 4.89E-11       | 0.00199774          | 6.62E-08           | 4.07E-14         | 1.66E-06              | 2.85E-10             |
| phe.Fasting_ | rs112027720 | S7      | DIAPH1 | rs116079984 | S8      | KPNA3       | 2.97E-15       | 1.21E-07            | 8.14E-12           | 1.24E-13         | 5.04E-06              | 7.34E-10             |
| phe.Fasting_ | rs112027720 | S7      | DIAPH1 | rs116120727 | S9      | BRD2        | 4.89E-11       | 0.00199774          | 6.62E-08           | 4.07E-14         | 1.66E-06              | 2.85E-10             |
| phe.Fasting_ | rs112027720 | S7      | DIAPH1 | rs116548615 | S8      | TMEM45B     | 1.73E-16       | 7.06E-09            | 6.15E-13           | 8.70E-12         | 0.000354153           | 3.26E-08             |
| phe.Fasting_ | rs112027720 | S7      | DIAPH1 | rs146815317 | S5      | KPNA3       | 2.97E-15       | 1.21E-07            | 8.14E-12           | 1.18E-13         | 4.80E-06              | 7.06E-10             |
| phe.Fasting_ | rs112027720 | S7      | DIAPH1 | rs150117838 | S8      | KPNA3       | 2.97E-15       | 1.21E-07            | 8.14E-12           | 1.09E-13         | 4.44E-06              | 6.79E-10             |
| phe.Fasting_ | rs112027720 | S7      | DIAPH1 | rs16894241  | S4      | HIST1H2BK   | 1.99E-11       | 0.000812315         | 2.96E-08           | 3.44E-14         | 1.40E-06              | 2.50E-10             |
| phe.Fasting_ | rs112027720 | S7      | DIAPH1 | rs57503635  | S3      | NA          | 6.34E-16       | 2.59E-08            | 1.95E-12           | 3.17E-14         | 1.29E-06              | 2.34E-10             |
| phe.Fasting_ | rs112027720 | S7      | DIAPH1 | rs7256517   | S7      | CYTH2       | 1.04E-15       | 4.24E-08            | 3.06E-12           | 4.82E-12         | 0.000196022           | 1.91E-08             |
| phe.Fasting_ | rs112027720 | S7      | DIAPH1 | rs73392640  | S8      | POLR3B      | 2.02E-10       | 0.00826001          | 2.49E-07           | 5.19E-11         | 0.00211214            | 1.67E-07             |
| phe.Fasting_ | rs112027720 | S7      | DIAPH1 | rs73619637  | S8      | NA          | 1.44E-15       | 5.89E-08            | 4.14E-12           | 2.05E-10         | 0.00833668            | 5.78E-07             |
| phe.Fasting_ | rs112027720 | S7      | DIAPH1 | rs74914207  | S24     | NA          | 1.37E-10       | 0.00558626          | 1.73E-07           | 9.12E-11         | 0.0037135             | 2.80E-07             |
| phe.Fasting_ | rs112027720 | S7      | DIAPH1 | rs75758702  | S24     | NA          | 7.02E-17       | 2.87E-09            | 3.16E-13           | 1.57E-10         | 0.00638323            | 4.59E-07             |
| phe.Fasting_ | rs112027720 | S7      | DIAPH1 | rs7763107   | S8      | FARS2       | 5.78E-16       | 2.36E-08            | 1.79E-12           | 9.23E-12         | 0.000375564           | 3.44E-08             |
| phe.Fasting_ | rs112027720 | S7      | DIAPH1 | rs77798597  | S7      | KPNA3       | 2.97E-15       | 1.21E-07            | 8.14E-12           | 1.09E-13         | 4.44E-06              | 6.79E-10             |
| phe.Fasting_ | rs112027720 | S7      | DIAPH1 | rs78516788  | S8      | SLC38A1     | 2.75E-11       | 0.00112269          | 3.94E-08           | 2.44E-10         | 0.00992686            | 6.74E-07             |
| phe.Fasting_ | rs112027720 | S7      | DIAPH1 | rs78736524  | S5      | KPNA3       | 2.97E-15       | 1.21E-07            | 8.14E-12           | 1.18E-13         | 4.80E-06              | 7.06E-10             |
| phe.Fasting_ | rs112027720 | S7      | DIAPH1 | rs79781495  | S8      | KPNA3       | 2.97E-15       | 1.21E-07            | 8.14E-12           | 1.09E-13         | 4.44E-06              | 6.79E-10             |
| phe.Fasting_ | rs112027720 | S7      | DIAPH1 | rs80332465  | S5      | KPNA3       | 3.13E-15       | 1.28E-07            | 8.51E-12           | 1.17E-13         | 4.77E-06              | 7.06E-10             |
| phe.Fasting_ | rs112027720 | S7      | DIAPH1 | rs80334773  | S5      | KPNA3       | 3.13E-15       | 1.28E-07            | 8.51E-12           | 1.17E-13         | 4.77E-06              | 7.06E-10             |
| phe.Fasting_ | rs112091318 | S5      | TMEM64 | rs115787552 | S5      | KPNA3       | 2.06E-16       | 8.43E-09            | 7.10E-13           | 5.89E-15         | 2.40E-07              | 5.36E-11             |
| phe.Fasting_ | rs112091318 | S5      | TMEM64 | rs115888477 | S8      | NA          | 1.42E-15       | 5.80E-08            | 4.09E-12           | 8.94E-16         | 3.64E-08              | 1.16E-11             |
| phe.Fasting_ | rs112091318 | S5      | TMEM64 | rs116079984 | S8      | KPNA3       | 2.06E-16       | 8.43E-09            | 7.10E-13           | 7.16E-15         | 2.91E-07              | 6.38E-11             |
| phe.Fasting_ | rs112091318 | S5      | TMEM64 | rs146815317 | S5      | KPNA3       | 2.06E-16       | 8.43E-09            | 7.10E-13           | 5.89E-15         | 2.40E-07              | 5.36E-11             |
| phe.Fasting_ | rs112091318 | S5      | TMEM64 | rs150117838 | S8      | KPNA3       | 2.06E-16       | 8.43E-09            | 7.10E-13           | 5.57E-15         | 2.27E-07              | 5.09E-11             |
| phe.Fasting_ | rs112091318 | S5      | TMEM64 | rs77798597  | S7      | KPNA3       | 2.06E-16       | 8.43E-09            | 7.10E-13           | 5.57E-15         | 2.27E-07              | 5.09E-11             |
| phe.Fasting_ | rs112091318 | S5      | TMEM64 | rs78736524  | S5      | KPNA3       | 2.06E-16       | 8.43E-09            | 7.10E-13           | 5.89E-15         | 2.40E-07              | 5.36E-11             |
| phe.Fasting_ | rs112091318 | S5      | TMEM64 | rs79781495  | S8      | KPNA3       | 2.06E-16       | 8.43E-09            | 7.10E-13           | 5.57E-15         | 2.27E-07              | 5.09E-11             |
| phe.Fasting_ | rs112091318 | S5      | TMEM64 | rs80332465  | S5      | KPNA3       | 2.06E-16       | 8.43E-09            | 7.10E-13           | 5.99E-15         | 2.44E-07              | 5.45E-11             |
| phe.Fasting_ | rs112091318 | S5      | TMEM64 | rs80334773  | S5      | KPNA3       | 2.06E-16       | 8.43E-09            | 7.10E-13           | 5.99E-15         | 2.44E-07              | 5.45E-11             |
| phe.Fasting_ | rs112348319 | S8      | SPTLC1 | rs12581352  | S2      | NA          | 7.63E-18       | 3.12E-10            | 8.49E-14           | 2.07E-13         | 8.42E-06              | 1.15E-09             |

|              |             |     |        |             |     |           |          |             |          |          |             |          |
|--------------|-------------|-----|--------|-------------|-----|-----------|----------|-------------|----------|----------|-------------|----------|
| phe.Fasting_ | rs112608164 | S8  | SPTLC1 | rs12581352  | S2  | NA        | 7.63E-18 | 3.12E-10    | 8.49E-14 | 2.07E-13 | 8.42E-06    | 1.15E-09 |
| phe.Fasting_ | rs112940854 | S5  | MYO1B  | rs113357907 | S24 | ISL1      | 9.16E-17 | 3.74E-09    | 3.95E-13 | 1.29E-14 | 5.26E-07    | 1.10E-10 |
| phe.Fasting_ | rs112940854 | S5  | MYO1B  | rs13400525  | S8  | MFF       | 1.15E-15 | 4.69E-08    | 3.37E-12 | 2.01E-10 | 0.00817811  | 5.71E-07 |
| phe.Fasting_ | rs112940854 | S5  | MYO1B  | rs141926074 | S8  | ATE1      | 1.60E-17 | 6.51E-10    | 1.22E-13 | 1.23E-11 | 0.000502351 | 4.52E-08 |
| phe.Fasting_ | rs112940854 | S5  | MYO1B  | rs6881310   | S23 | ISL1      | 5.93E-16 | 2.42E-08    | 1.84E-12 | 5.44E-12 | 0.000221427 | 2.14E-08 |
| phe.Fasting_ | rs112940854 | S5  | MYO1B  | rs75758702  | S24 | NA        | 7.83E-17 | 3.20E-09    | 3.47E-13 | 1.29E-11 | 0.000525218 | 4.72E-08 |
| phe.Fasting_ | rs112940854 | S5  | MYO1B  | rs77444916  | S23 | LOC642366 | 2.06E-16 | 8.39E-09    | 7.10E-13 | 1.23E-14 | 5.00E-07    | 1.05E-10 |
| phe.Fasting_ | rs112940854 | S5  | MYO1B  | rs80258830  | S24 | LOC642366 | 2.06E-16 | 8.39E-09    | 7.10E-13 | 1.23E-14 | 5.00E-07    | 1.05E-10 |
| phe.Fasting_ | rs113219478 | S7  | DIAPH1 | rs115787552 | S5  | KPNA3     | 2.97E-15 | 1.21E-07    | 8.14E-12 | 1.18E-13 | 4.80E-06    | 7.06E-10 |
| phe.Fasting_ | rs113219478 | S7  | DIAPH1 | rs115888477 | S8  | NA        | 2.03E-14 | 8.28E-07    | 5.02E-11 | 2.21E-14 | 8.99E-07    | 1.73E-10 |
| phe.Fasting_ | rs113219478 | S7  | DIAPH1 | rs116011837 | S9  | BRD2      | 4.89E-11 | 0.00199774  | 6.62E-08 | 4.07E-14 | 1.66E-06    | 2.85E-10 |
| phe.Fasting_ | rs113219478 | S7  | DIAPH1 | rs116079984 | S8  | KPNA3     | 2.97E-15 | 1.21E-07    | 8.14E-12 | 1.24E-13 | 5.04E-06    | 7.34E-10 |
| phe.Fasting_ | rs113219478 | S7  | DIAPH1 | rs116120727 | S9  | BRD2      | 4.89E-11 | 0.00199774  | 6.62E-08 | 4.07E-14 | 1.66E-06    | 2.85E-10 |
| phe.Fasting_ | rs113219478 | S7  | DIAPH1 | rs116548615 | S8  | TMEM45B   | 1.73E-16 | 7.06E-09    | 6.15E-13 | 8.70E-12 | 0.000354153 | 3.26E-08 |
| phe.Fasting_ | rs113219478 | S7  | DIAPH1 | rs146815317 | S5  | KPNA3     | 2.97E-15 | 1.21E-07    | 8.14E-12 | 1.18E-13 | 4.80E-06    | 7.06E-10 |
| phe.Fasting_ | rs113219478 | S7  | DIAPH1 | rs150117838 | S8  | KPNA3     | 2.97E-15 | 1.21E-07    | 8.14E-12 | 1.09E-13 | 4.44E-06    | 6.79E-10 |
| phe.Fasting_ | rs113219478 | S7  | DIAPH1 | rs16894241  | S4  | HIST1H2BK | 1.99E-11 | 0.000812315 | 2.96E-08 | 3.44E-14 | 1.40E-06    | 2.50E-10 |
| phe.Fasting_ | rs113219478 | S7  | DIAPH1 | rs57503635  | S3  | NA        | 6.34E-16 | 2.59E-08    | 1.95E-12 | 3.17E-14 | 1.29E-06    | 2.34E-10 |
| phe.Fasting_ | rs113219478 | S7  | DIAPH1 | rs7256517   | S7  | CYTH2     | 1.04E-15 | 4.24E-08    | 3.06E-12 | 4.82E-12 | 0.000196022 | 1.91E-08 |
| phe.Fasting_ | rs113219478 | S7  | DIAPH1 | rs73392640  | S8  | POLR3B    | 2.02E-10 | 0.00826001  | 2.49E-07 | 5.19E-11 | 0.00211214  | 1.67E-07 |
| phe.Fasting_ | rs113219478 | S7  | DIAPH1 | rs73619637  | S8  | NA        | 1.44E-15 | 5.89E-08    | 4.14E-12 | 2.05E-10 | 0.00833668  | 5.78E-07 |
| phe.Fasting_ | rs113219478 | S7  | DIAPH1 | rs74914207  | S24 | NA        | 1.37E-10 | 0.00558626  | 1.73E-07 | 9.12E-11 | 0.0037135   | 2.80E-07 |
| phe.Fasting_ | rs113219478 | S7  | DIAPH1 | rs75758702  | S24 | NA        | 7.02E-17 | 2.87E-09    | 3.16E-13 | 1.57E-10 | 0.00638323  | 4.59E-07 |
| phe.Fasting_ | rs113219478 | S7  | DIAPH1 | rs7763107   | S8  | FARS2     | 5.78E-16 | 2.36E-08    | 1.79E-12 | 9.23E-12 | 0.000375564 | 3.44E-08 |
| phe.Fasting_ | rs113219478 | S7  | DIAPH1 | rs77798597  | S7  | KPNA3     | 2.97E-15 | 1.21E-07    | 8.14E-12 | 1.09E-13 | 4.44E-06    | 6.79E-10 |
| phe.Fasting_ | rs113219478 | S7  | DIAPH1 | rs78516788  | S8  | SLC38A1   | 2.75E-11 | 0.00112269  | 3.94E-08 | 2.44E-10 | 0.00992686  | 6.74E-07 |
| phe.Fasting_ | rs113219478 | S7  | DIAPH1 | rs78736524  | S5  | KPNA3     | 2.97E-15 | 1.21E-07    | 8.14E-12 | 1.18E-13 | 4.80E-06    | 7.06E-10 |
| phe.Fasting_ | rs113219478 | S7  | DIAPH1 | rs79781495  | S8  | KPNA3     | 2.97E-15 | 1.21E-07    | 8.14E-12 | 1.09E-13 | 4.44E-06    | 6.79E-10 |
| phe.Fasting_ | rs113219478 | S7  | DIAPH1 | rs80332465  | S5  | KPNA3     | 3.13E-15 | 1.28E-07    | 8.51E-12 | 1.17E-13 | 4.77E-06    | 7.06E-10 |
| phe.Fasting_ | rs113219478 | S7  | DIAPH1 | rs80334773  | S5  | KPNA3     | 3.13E-15 | 1.28E-07    | 8.51E-12 | 1.17E-13 | 4.77E-06    | 7.06E-10 |
| phe.Fasting_ | rs113357907 | S24 | ISL1   | rs111576333 | S5  | TMEM64    | 1.53E-17 | 6.25E-10    | 1.19E-13 | 7.14E-15 | 2.91E-07    | 6.37E-11 |
| phe.Fasting_ | rs113357907 | S24 | ISL1   | rs112091318 | S5  | TMEM64    | 4.64E-18 | 1.89E-10    | 6.53E-14 | 8.48E-15 | 3.45E-07    | 7.46E-11 |
| phe.Fasting_ | rs113357907 | S24 | ISL1   | rs114334325 | S7  | AP3M2     | 5.53E-12 | 0.000225777 | 9.75E-09 | 5.21E-15 | 2.12E-07    | 4.77E-11 |
| phe.Fasting_ | rs113357907 | S24 | ISL1   | rs114394395 | S7  | AP3M2     | 5.76E-12 | 0.000235376 | 1.01E-08 | 5.21E-15 | 2.12E-07    | 4.77E-11 |
| phe.Fasting_ | rs113357907 | S24 | ISL1   | rs114565620 | S8  | RCL1      | 7.60E-18 | 3.10E-10    | 8.48E-14 | 5.79E-15 | 2.36E-07    | 5.27E-11 |
| phe.Fasting_ | rs113357907 | S24 | ISL1   | rs115305957 | S23 | NA        | 6.19E-18 | 2.53E-10    | 7.56E-14 | 3.34E-15 | 1.36E-07    | 3.20E-11 |
| phe.Fasting_ | rs113357907 | S24 | ISL1   | rs115787552 | S5  | KPNA3     | 6.45E-17 | 2.64E-09    | 2.97E-13 | 3.26E-14 | 1.33E-06    | 2.39E-10 |
| phe.Fasting_ | rs113357907 | S24 | ISL1   | rs115888477 | S8  | NA        | 5.08E-16 | 2.08E-08    | 1.60E-12 | 5.65E-15 | 2.30E-07    | 5.16E-11 |
| phe.Fasting_ | rs113357907 | S24 | ISL1   | rs116011837 | S9  | BRD2      | 9.34E-18 | 3.81E-10    | 9.31E-14 | 3.16E-13 | 1.29E-05    | 1.73E-09 |
| phe.Fasting_ | rs113357907 | S24 | ISL1   | rs116079984 | S8  | KPNA3     | 6.45E-17 | 2.64E-09    | 2.97E-13 | 3.69E-14 | 1.50E-06    | 2.65E-10 |

|                             |      |                |             |          |             |          |          |             |          |
|-----------------------------|------|----------------|-------------|----------|-------------|----------|----------|-------------|----------|
| phe.Fasting_rs113357907 S24 | ISL1 | rs116120727 S9 | BRD2        | 9.34E-18 | 3.81E-10    | 9.31E-14 | 3.16E-13 | 1.29E-05    | 1.73E-09 |
| phe.Fasting_rs113357907 S24 | ISL1 | rs116406581 S2 | NA          | 2.35E-11 | 0.000957854 | 3.42E-08 | 4.16E-15 | 1.69E-07    | 3.88E-11 |
| phe.Fasting_rs113357907 S24 | ISL1 | rs116696844 S3 | AP3M2       | 1.27E-11 | 0.000516614 | 1.97E-08 | 5.21E-15 | 2.12E-07    | 4.77E-11 |
| phe.Fasting_rs113357907 S24 | ISL1 | rs11989304 S4  | TMEM64      | 1.53E-17 | 6.25E-10    | 1.19E-13 | 6.84E-15 | 2.78E-07    | 6.11E-11 |
| phe.Fasting_rs113357907 S24 | ISL1 | rs141926074 S8 | ATE1        | 2.19E-18 | 8.94E-11    | 4.33E-14 | 8.91E-14 | 3.63E-06    | 5.94E-10 |
| phe.Fasting_rs113357907 S24 | ISL1 | rs146815317 S5 | KPNA3       | 6.45E-17 | 2.64E-09    | 2.97E-13 | 3.26E-14 | 1.33E-06    | 2.39E-10 |
| phe.Fasting_rs113357907 S24 | ISL1 | rs1470889 S5   | ZC3H3       | 9.88E-19 | 4.04E-11    | 2.92E-14 | 2.34E-13 | 9.52E-06    | 1.29E-09 |
| phe.Fasting_rs113357907 S24 | ISL1 | rs1470890 S5   | ZC3H3       | 9.88E-19 | 4.04E-11    | 2.92E-14 | 2.34E-13 | 9.52E-06    | 1.29E-09 |
| phe.Fasting_rs113357907 S24 | ISL1 | rs150117838 S8 | KPNA3       | 6.45E-17 | 2.64E-09    | 2.97E-13 | 3.04E-14 | 1.24E-06    | 2.27E-10 |
| phe.Fasting_rs113357907 S24 | ISL1 | rs17494290 S5  | CDH2        | 1.20E-19 | 4.91E-12    | 2.23E-14 | 2.40E-12 | 9.78E-05    | 1.03E-08 |
| phe.Fasting_rs113357907 S24 | ISL1 | rs2924507 S5   | ZC3H3       | 9.88E-19 | 4.04E-11    | 2.92E-14 | 2.34E-13 | 9.52E-06    | 1.29E-09 |
| phe.Fasting_rs113357907 S24 | ISL1 | rs2924508 S8   | ZC3H3       | 9.88E-19 | 4.04E-11    | 2.92E-14 | 3.32E-13 | 1.35E-05    | 1.80E-09 |
| phe.Fasting_rs113357907 S24 | ISL1 | rs2924511 S7   | ZC3H3       | 9.88E-19 | 4.04E-11    | 2.92E-14 | 2.10E-13 | 8.55E-06    | 1.17E-09 |
| phe.Fasting_rs113357907 S24 | ISL1 | rs2924512 S7   | ZC3H3       | 1.14E-18 | 4.67E-11    | 3.11E-14 | 2.44E-13 | 9.92E-06    | 1.34E-09 |
| phe.Fasting_rs113357907 S24 | ISL1 | rs2956376 S8   | ZC3H3       | 9.88E-19 | 4.04E-11    | 2.92E-14 | 1.42E-13 | 5.79E-06    | 8.10E-10 |
| phe.Fasting_rs113357907 S24 | ISL1 | rs2980270 S7   | ZC3H3       | 9.88E-19 | 4.04E-11    | 2.92E-14 | 1.42E-13 | 5.79E-06    | 8.10E-10 |
| phe.Fasting_rs113357907 S24 | ISL1 | rs2980272 S7   | ZC3H3       | 1.14E-18 | 4.67E-11    | 3.11E-14 | 2.69E-13 | 1.09E-05    | 1.48E-09 |
| phe.Fasting_rs113357907 S24 | ISL1 | rs2980275 S5   | ZC3H3       | 9.88E-19 | 4.04E-11    | 2.92E-14 | 2.34E-13 | 9.52E-06    | 1.29E-09 |
| phe.Fasting_rs113357907 S24 | ISL1 | rs366767 S5    | ZC3H3       | 1.45E-18 | 5.92E-11    | 3.49E-14 | 1.59E-13 | 6.46E-06    | 9.00E-10 |
| phe.Fasting_rs113357907 S24 | ISL1 | rs57503635 S3  | NA          | 3.56E-17 | 1.46E-09    | 1.95E-13 | 1.31E-14 | 5.34E-07    | 1.12E-10 |
| phe.Fasting_rs113357907 S24 | ISL1 | rs7004597 S8   | NA          | 5.53E-12 | 0.000225777 | 9.75E-09 | 3.58E-15 | 1.46E-07    | 3.41E-11 |
| phe.Fasting_rs113357907 S24 | ISL1 | rs7256517 S7   | CYTH2       | 4.07E-17 | 1.66E-09    | 2.15E-13 | 9.22E-15 | 3.75E-07    | 8.04E-11 |
| phe.Fasting_rs113357907 S24 | ISL1 | rs73283603 S7  | ZWINT       | 3.93E-17 | 1.60E-09    | 2.11E-13 | 5.99E-15 | 2.44E-07    | 5.44E-11 |
| phe.Fasting_rs113357907 S24 | ISL1 | rs74627895 S8  | TMEM64      | 4.64E-18 | 1.89E-10    | 6.53E-14 | 4.16E-15 | 1.69E-07    | 3.88E-11 |
| phe.Fasting_rs113357907 S24 | ISL1 | rs74701059 S24 | C17orf102   | 6.33E-18 | 2.58E-10    | 7.66E-14 | 3.41E-15 | 1.39E-07    | 3.26E-11 |
| phe.Fasting_rs113357907 S24 | ISL1 | rs74914207 S24 | NA          | 1.33E-12 | 5.44E-05    | 2.62E-09 | 1.66E-11 | 0.000676089 | 5.95E-08 |
| phe.Fasting_rs113357907 S24 | ISL1 | rs75350765 S5  | RCL1        | 7.60E-18 | 3.10E-10    | 8.48E-14 | 5.79E-15 | 2.36E-07    | 5.27E-11 |
| phe.Fasting_rs113357907 S24 | ISL1 | rs75374128 S5  | CNTLN       | 4.46E-18 | 1.82E-10    | 6.40E-14 | 8.93E-11 | 0.00363454  | 2.75E-07 |
| phe.Fasting_rs113357907 S24 | ISL1 | rs75864203 S8  | CNTLN       | 4.46E-18 | 1.82E-10    | 6.40E-14 | 8.93E-11 | 0.00363454  | 2.75E-07 |
| phe.Fasting_rs113357907 S24 | ISL1 | rs75949566 S5  | TMEM64      | 1.56E-17 | 6.37E-10    | 1.20E-13 | 9.89E-15 | 4.03E-07    | 8.59E-11 |
| phe.Fasting_rs113357907 S24 | ISL1 | rs7763107 S8   | FARS2       | 2.78E-17 | 1.13E-09    | 1.64E-13 | 1.37E-15 | 5.56E-08    | 1.54E-11 |
| phe.Fasting_rs113357907 S24 | ISL1 | rs77798597 S7  | KPNA3       | 6.45E-17 | 2.64E-09    | 2.97E-13 | 3.04E-14 | 1.24E-06    | 2.27E-10 |
| phe.Fasting_rs113357907 S24 | ISL1 | rs77845645 S21 | NA          | 6.39E-18 | 2.61E-10    | 7.72E-14 | 1.26E-14 | 5.13E-07    | 1.08E-10 |
| phe.Fasting_rs113357907 S24 | ISL1 | rs78353402 S8  | AP3M2       | 5.53E-12 | 0.000225777 | 9.75E-09 | 5.21E-15 | 2.12E-07    | 4.77E-11 |
| phe.Fasting_rs113357907 S24 | ISL1 | rs78516788 S8  | SLC38A1     | 4.92E-18 | 2.01E-10    | 6.76E-14 | 1.07E-14 | 4.35E-07    | 9.27E-11 |
| phe.Fasting_rs113357907 S24 | ISL1 | rs78697063 S5  | MSI2        | 1.84E-20 | 7.51E-13    | 1.89E-14 | 3.34E-15 | 1.36E-07    | 3.20E-11 |
| phe.Fasting_rs113357907 S24 | ISL1 | rs78722272 S5  | CNTLN       | 4.46E-18 | 1.82E-10    | 6.40E-14 | 8.82E-11 | 0.00359026  | 2.72E-07 |
| phe.Fasting_rs113357907 S24 | ISL1 | rs78736524 S5  | KPNA3       | 6.45E-17 | 2.64E-09    | 2.97E-13 | 3.26E-14 | 1.33E-06    | 2.39E-10 |
| phe.Fasting_rs113357907 S24 | ISL1 | rs78990344 S2  | LOC10050631 | 1.53E-17 | 6.25E-10    | 1.19E-13 | 6.84E-15 | 2.78E-07    | 6.11E-11 |
| phe.Fasting_rs113357907 S24 | ISL1 | rs79703349 S24 | C17orf102   | 6.33E-18 | 2.58E-10    | 7.66E-14 | 3.88E-15 | 1.58E-07    | 3.65E-11 |

|              |             |     |        |             |     |             |          |             |          |          |             |          |
|--------------|-------------|-----|--------|-------------|-----|-------------|----------|-------------|----------|----------|-------------|----------|
| phe.Fasting_ | rs113357907 | S24 | ISL1   | rs79781495  | S8  | KPNA3       | 6.45E-17 | 2.64E-09    | 2.97E-13 | 3.04E-14 | 1.24E-06    | 2.27E-10 |
| phe.Fasting_ | rs113357907 | S24 | ISL1   | rs80332465  | S5  | KPNA3       | 7.00E-17 | 2.86E-09    | 3.16E-13 | 3.19E-14 | 1.30E-06    | 2.35E-10 |
| phe.Fasting_ | rs113357907 | S24 | ISL1   | rs80334773  | S5  | KPNA3       | 7.00E-17 | 2.86E-09    | 3.16E-13 | 3.19E-14 | 1.30E-06    | 2.35E-10 |
| phe.Fasting_ | rs113568654 | S12 | SPTLC1 | rs12581352  | S2  | NA          | 7.73E-18 | 3.16E-10    | 8.51E-14 | 1.06E-12 | 4.32E-05    | 4.92E-09 |
| phe.Fasting_ | rs114032844 | S21 | NA     | rs139070959 | S8  | RPN2        | 9.49E-17 | 3.88E-09    | 4.08E-13 | 1.38E-14 | 5.63E-07    | 1.17E-10 |
| phe.Fasting_ | rs114032844 | S21 | NA     | rs145412529 | S8  | "RBL1,RPS3A | 5.68E-17 | 2.32E-09    | 2.72E-13 | 1.54E-14 | 6.27E-07    | 1.29E-10 |
| phe.Fasting_ | rs114334325 | S7  | AP3M2  | rs73619637  | S8  | NA          | 3.31E-14 | 1.35E-06    | 8.02E-11 | 5.78E-11 | 0.0023523   | 1.85E-07 |
| phe.Fasting_ | rs114394395 | S7  | AP3M2  | rs73619637  | S8  | NA          | 3.53E-14 | 1.44E-06    | 8.53E-11 | 5.78E-11 | 0.0023523   | 1.85E-07 |
| phe.Fasting_ | rs114565620 | S8  | RCL1   | rs115083290 | S19 | NA          | 2.89E-17 | 1.18E-09    | 1.66E-13 | 3.20E-14 | 1.30E-06    | 2.35E-10 |
| phe.Fasting_ | rs114565620 | S8  | RCL1   | rs115752779 | S19 | NA          | 2.89E-17 | 1.18E-09    | 1.66E-13 | 3.20E-14 | 1.30E-06    | 2.35E-10 |
| phe.Fasting_ | rs114565620 | S8  | RCL1   | rs139070959 | S8  | RPN2        | 5.03E-18 | 2.06E-10    | 6.86E-14 | 9.04E-15 | 3.68E-07    | 7.90E-11 |
| phe.Fasting_ | rs114565620 | S8  | RCL1   | rs145412529 | S8  | "RBL1,RPS3A | 2.94E-18 | 1.20E-10    | 5.06E-14 | 1.03E-14 | 4.19E-07    | 8.92E-11 |
| phe.Fasting_ | rs114565620 | S8  | RCL1   | rs57503635  | S3  | NA          | 4.19E-17 | 1.71E-09    | 2.22E-13 | 1.28E-21 | 5.23E-14    | 4.02E-15 |
| phe.Fasting_ | rs114565620 | S8  | RCL1   | rs73619637  | S8  | NA          | 5.38E-17 | 2.20E-09    | 2.63E-13 | 4.57E-11 | 0.00185897  | 1.49E-07 |
| phe.Fasting_ | rs114764631 | S23 | NA     | rs112009962 | S8  | NA          | 2.59E-18 | 1.06E-10    | 4.63E-14 | 3.08E-15 | 1.25E-07    | 2.96E-11 |
| phe.Fasting_ | rs114764631 | S23 | NA     | rs12581352  | S2  | NA          | 3.05E-18 | 1.25E-10    | 5.24E-14 | 1.55E-15 | 6.32E-08    | 1.73E-11 |
| phe.Fasting_ | rs115083290 | S19 | NA     | rs139070959 | S8  | RPN2        | 2.80E-17 | 1.15E-09    | 1.64E-13 | 1.96E-12 | 7.97E-05    | 8.52E-09 |
| phe.Fasting_ | rs115083290 | S19 | NA     | rs145412529 | S8  | "RBL1,RPS3A | 1.67E-17 | 6.80E-10    | 1.26E-13 | 2.21E-12 | 9.01E-05    | 9.56E-09 |
| phe.Fasting_ | rs115083290 | S19 | NA     | rs57503635  | S3  | NA          | 2.42E-16 | 9.88E-09    | 8.21E-13 | 6.72E-14 | 2.74E-06    | 4.55E-10 |
| phe.Fasting_ | rs115088919 | S24 | NA     | rs12581352  | S2  | NA          | 2.60E-18 | 1.06E-10    | 4.65E-14 | 1.14E-11 | 0.00046266  | 4.18E-08 |
| phe.Fasting_ | rs115752779 | S19 | NA     | rs139070959 | S8  | RPN2        | 2.80E-17 | 1.15E-09    | 1.64E-13 | 1.96E-12 | 7.97E-05    | 8.52E-09 |
| phe.Fasting_ | rs115752779 | S19 | NA     | rs145412529 | S8  | "RBL1,RPS3A | 1.67E-17 | 6.80E-10    | 1.26E-13 | 2.21E-12 | 9.01E-05    | 9.56E-09 |
| phe.Fasting_ | rs115752779 | S19 | NA     | rs57503635  | S3  | NA          | 2.42E-16 | 9.88E-09    | 8.21E-13 | 6.72E-14 | 2.74E-06    | 4.55E-10 |
| phe.Fasting_ | rs115787552 | S5  | KPNA3  | rs57503635  | S3  | NA          | 1.29E-15 | 5.25E-08    | 3.74E-12 | 4.33E-15 | 1.76E-07    | 4.03E-11 |
| phe.Fasting_ | rs115888477 | S8  | NA     | rs57503635  | S3  | NA          | 8.77E-15 | 3.58E-07    | 2.24E-11 | 7.79E-16 | 3.17E-08    | 1.16E-11 |
| phe.Fasting_ | rs115888477 | S8  | NA     | rs75506779  | S5  | TMCO3       | 1.13E-15 | 4.60E-08    | 3.30E-12 | 3.86E-16 | 1.57E-08    | 1.16E-11 |
| phe.Fasting_ | rs116011837 | S9  | BRD2   | rs112089881 | S8  | ZFAND4      | 2.75E-18 | 1.12E-10    | 4.87E-14 | 2.89E-17 | 1.18E-09    | 2.81E-12 |
| phe.Fasting_ | rs116011837 | S9  | BRD2   | rs112348319 | S8  | SPTLC1      | 9.09E-14 | 3.71E-06    | 2.08E-10 | 4.63E-11 | 0.00188663  | 1.51E-07 |
| phe.Fasting_ | rs116011837 | S9  | BRD2   | rs112608164 | S8  | SPTLC1      | 9.09E-14 | 3.71E-06    | 2.08E-10 | 4.63E-11 | 0.00188663  | 1.51E-07 |
| phe.Fasting_ | rs116011837 | S9  | BRD2   | rs114334325 | S7  | AP3M2       | 5.95E-16 | 2.43E-08    | 1.84E-12 | 7.47E-14 | 3.04E-06    | 5.01E-10 |
| phe.Fasting_ | rs116011837 | S9  | BRD2   | rs114394395 | S7  | AP3M2       | 6.40E-16 | 2.61E-08    | 1.97E-12 | 7.47E-14 | 3.04E-06    | 5.01E-10 |
| phe.Fasting_ | rs116011837 | S9  | BRD2   | rs114565620 | S8  | RCL1        | 1.29E-17 | 5.27E-10    | 1.08E-13 | 2.80E-12 | 0.000113775 | 1.19E-08 |
| phe.Fasting_ | rs116011837 | S9  | BRD2   | rs115787552 | S5  | KPNA3       | 6.47E-12 | 0.000264296 | 1.13E-08 | 5.11E-15 | 2.08E-07    | 4.70E-11 |
| phe.Fasting_ | rs116011837 | S9  | BRD2   | rs115888477 | S8  | NA          | 2.63E-11 | 0.00107232  | 3.78E-08 | 1.14E-15 | 4.64E-08    | 1.31E-11 |
| phe.Fasting_ | rs116011837 | S9  | BRD2   | rs116079984 | S8  | KPNA3       | 6.47E-12 | 0.000264296 | 1.13E-08 | 8.10E-15 | 3.30E-07    | 7.15E-11 |
| phe.Fasting_ | rs116011837 | S9  | BRD2   | rs116406581 | S2  | NA          | 2.60E-15 | 1.06E-07    | 7.29E-12 | 4.98E-14 | 2.03E-06    | 3.45E-10 |
| phe.Fasting_ | rs116011837 | S9  | BRD2   | rs116548615 | S8  | TMEM45B     | 2.55E-17 | 1.04E-09    | 1.58E-13 | 2.14E-12 | 8.73E-05    | 9.31E-09 |
| phe.Fasting_ | rs116011837 | S9  | BRD2   | rs116696844 | S3  | AP3M2       | 9.71E-16 | 3.96E-08    | 2.89E-12 | 7.47E-14 | 3.04E-06    | 5.01E-10 |
| phe.Fasting_ | rs116011837 | S9  | BRD2   | rs141926074 | S8  | ATE1        | 4.36E-18 | 1.78E-10    | 6.36E-14 | 8.52E-14 | 3.47E-06    | 5.69E-10 |
| phe.Fasting_ | rs116011837 | S9  | BRD2   | rs146815317 | S5  | KPNA3       | 6.47E-12 | 0.000264296 | 1.13E-08 | 5.11E-15 | 2.08E-07    | 4.70E-11 |

|                           |       |                |           |          |             |          |          |             |          |
|---------------------------|-------|----------------|-----------|----------|-------------|----------|----------|-------------|----------|
| phe.Fasting_rs116011837S9 | BRD2  | rs150117838S8  | KPNA3     | 6.47E-12 | 0.000264296 | 1.13E-08 | 6.64E-15 | 2.70E-07    | 5.95E-11 |
| phe.Fasting_rs116011837S9 | BRD2  | rs366767 S5    | ZC3H3     | 1.08E-13 | 4.41E-06    | 2.45E-10 | 9.53E-13 | 3.88E-05    | 4.53E-09 |
| phe.Fasting_rs116011837S9 | BRD2  | rs7004597 S8   | NA        | 5.95E-16 | 2.43E-08    | 1.84E-12 | 4.49E-14 | 1.83E-06    | 3.12E-10 |
| phe.Fasting_rs116011837S9 | BRD2  | rs75350765 S5  | RCL1      | 1.29E-17 | 5.27E-10    | 1.08E-13 | 2.80E-12 | 0.000113775 | 1.19E-08 |
| phe.Fasting_rs116011837S9 | BRD2  | rs76542405 S5  | SPTLC1    | 9.09E-14 | 3.71E-06    | 2.08E-10 | 4.63E-11 | 0.00188663  | 1.51E-07 |
| phe.Fasting_rs116011837S9 | BRD2  | rs77523818 S7  | SPTLC1    | 9.09E-14 | 3.71E-06    | 2.08E-10 | 4.63E-11 | 0.00188663  | 1.51E-07 |
| phe.Fasting_rs116011837S9 | BRD2  | rs77798597 S7  | KPNA3     | 6.47E-12 | 0.000264296 | 1.13E-08 | 6.64E-15 | 2.70E-07    | 5.95E-11 |
| phe.Fasting_rs116011837S9 | BRD2  | rs78353402 S8  | AP3M2     | 5.95E-16 | 2.43E-08    | 1.84E-12 | 7.47E-14 | 3.04E-06    | 5.01E-10 |
| phe.Fasting_rs116011837S9 | BRD2  | rs78736524 S5  | KPNA3     | 6.47E-12 | 0.000264296 | 1.13E-08 | 5.11E-15 | 2.08E-07    | 4.70E-11 |
| phe.Fasting_rs116011837S9 | BRD2  | rs79703349 S24 | C17orf102 | 5.18E-14 | 2.12E-06    | 1.22E-10 | 5.11E-11 | 0.00207984  | 1.65E-07 |
| phe.Fasting_rs116011837S9 | BRD2  | rs79781495 S8  | KPNA3     | 6.47E-12 | 0.000264296 | 1.13E-08 | 6.64E-15 | 2.70E-07    | 5.95E-11 |
| phe.Fasting_rs116011837S9 | BRD2  | rs80332465 S5  | KPNA3     | 6.98E-12 | 0.000284941 | 1.20E-08 | 8.15E-15 | 3.32E-07    | 7.19E-11 |
| phe.Fasting_rs116011837S9 | BRD2  | rs80334773 S5  | KPNA3     | 6.98E-12 | 0.000284941 | 1.20E-08 | 8.15E-15 | 3.32E-07    | 7.19E-11 |
| phe.Fasting_rs116079984S8 | KPNA3 | rs57503635 S3  | NA        | 1.29E-15 | 5.25E-08    | 3.74E-12 | 5.16E-15 | 2.10E-07    | 4.74E-11 |
| phe.Fasting_rs116120727S9 | BRD2  | rs112089881S8  | ZFAND4    | 2.75E-18 | 1.12E-10    | 4.87E-14 | 2.89E-17 | 1.18E-09    | 2.81E-12 |
| phe.Fasting_rs116120727S9 | BRD2  | rs112348319S8  | SPTLC1    | 9.09E-14 | 3.71E-06    | 2.08E-10 | 4.63E-11 | 0.00188663  | 1.51E-07 |
| phe.Fasting_rs116120727S9 | BRD2  | rs112608164S8  | SPTLC1    | 9.09E-14 | 3.71E-06    | 2.08E-10 | 4.63E-11 | 0.00188663  | 1.51E-07 |
| phe.Fasting_rs116120727S9 | BRD2  | rs114334325S7  | AP3M2     | 5.95E-16 | 2.43E-08    | 1.84E-12 | 7.47E-14 | 3.04E-06    | 5.01E-10 |
| phe.Fasting_rs116120727S9 | BRD2  | rs114394395S7  | AP3M2     | 6.40E-16 | 2.61E-08    | 1.97E-12 | 7.47E-14 | 3.04E-06    | 5.01E-10 |
| phe.Fasting_rs116120727S9 | BRD2  | rs114565620S8  | RCL1      | 1.29E-17 | 5.27E-10    | 1.08E-13 | 2.80E-12 | 0.000113775 | 1.19E-08 |
| phe.Fasting_rs116120727S9 | BRD2  | rs115787552S5  | KPNA3     | 6.47E-12 | 0.000264296 | 1.13E-08 | 5.11E-15 | 2.08E-07    | 4.70E-11 |
| phe.Fasting_rs116120727S9 | BRD2  | rs115888477S8  | NA        | 2.63E-11 | 0.00107232  | 3.78E-08 | 1.14E-15 | 4.64E-08    | 1.31E-11 |
| phe.Fasting_rs116120727S9 | BRD2  | rs116079984S8  | KPNA3     | 6.47E-12 | 0.000264296 | 1.13E-08 | 8.10E-15 | 3.30E-07    | 7.15E-11 |
| phe.Fasting_rs116120727S9 | BRD2  | rs116406581S2  | NA        | 2.60E-15 | 1.06E-07    | 7.29E-12 | 4.98E-14 | 2.03E-06    | 3.45E-10 |
| phe.Fasting_rs116120727S9 | BRD2  | rs116548615S8  | TMEM45B   | 2.55E-17 | 1.04E-09    | 1.58E-13 | 2.14E-12 | 8.73E-05    | 9.31E-09 |
| phe.Fasting_rs116120727S9 | BRD2  | rs116696844S3  | AP3M2     | 9.71E-16 | 3.96E-08    | 2.89E-12 | 7.47E-14 | 3.04E-06    | 5.01E-10 |
| phe.Fasting_rs116120727S9 | BRD2  | rs141926074S8  | ATE1      | 4.36E-18 | 1.78E-10    | 6.36E-14 | 8.52E-14 | 3.47E-06    | 5.69E-10 |
| phe.Fasting_rs116120727S9 | BRD2  | rs146815317S5  | KPNA3     | 6.47E-12 | 0.000264296 | 1.13E-08 | 5.11E-15 | 2.08E-07    | 4.70E-11 |
| phe.Fasting_rs116120727S9 | BRD2  | rs150117838S8  | KPNA3     | 6.47E-12 | 0.000264296 | 1.13E-08 | 6.64E-15 | 2.70E-07    | 5.95E-11 |
| phe.Fasting_rs116120727S9 | BRD2  | rs366767 S5    | ZC3H3     | 1.08E-13 | 4.41E-06    | 2.45E-10 | 9.53E-13 | 3.88E-05    | 4.53E-09 |
| phe.Fasting_rs116120727S9 | BRD2  | rs7004597 S8   | NA        | 5.95E-16 | 2.43E-08    | 1.84E-12 | 4.49E-14 | 1.83E-06    | 3.12E-10 |
| phe.Fasting_rs116120727S9 | BRD2  | rs75350765 S5  | RCL1      | 1.29E-17 | 5.27E-10    | 1.08E-13 | 2.80E-12 | 0.000113775 | 1.19E-08 |
| phe.Fasting_rs116120727S9 | BRD2  | rs76542405 S5  | SPTLC1    | 9.09E-14 | 3.71E-06    | 2.08E-10 | 4.63E-11 | 0.00188663  | 1.51E-07 |
| phe.Fasting_rs116120727S9 | BRD2  | rs77523818 S7  | SPTLC1    | 9.09E-14 | 3.71E-06    | 2.08E-10 | 4.63E-11 | 0.00188663  | 1.51E-07 |
| phe.Fasting_rs116120727S9 | BRD2  | rs77798597 S7  | KPNA3     | 6.47E-12 | 0.000264296 | 1.13E-08 | 6.64E-15 | 2.70E-07    | 5.95E-11 |
| phe.Fasting_rs116120727S9 | BRD2  | rs78353402 S8  | AP3M2     | 5.95E-16 | 2.43E-08    | 1.84E-12 | 7.47E-14 | 3.04E-06    | 5.01E-10 |
| phe.Fasting_rs116120727S9 | BRD2  | rs78736524 S5  | KPNA3     | 6.47E-12 | 0.000264296 | 1.13E-08 | 5.11E-15 | 2.08E-07    | 4.70E-11 |
| phe.Fasting_rs116120727S9 | BRD2  | rs79703349 S24 | C17orf102 | 5.18E-14 | 2.12E-06    | 1.22E-10 | 5.11E-11 | 0.00207984  | 1.65E-07 |
| phe.Fasting_rs116120727S9 | BRD2  | rs79781495 S8  | KPNA3     | 6.47E-12 | 0.000264296 | 1.13E-08 | 6.64E-15 | 2.70E-07    | 5.95E-11 |
| phe.Fasting_rs116120727S9 | BRD2  | rs80332465 S5  | KPNA3     | 6.98E-12 | 0.000284941 | 1.20E-08 | 8.15E-15 | 3.32E-07    | 7.19E-11 |

|              |             |     |           |             |    |             |          |             |          |          |             |          |
|--------------|-------------|-----|-----------|-------------|----|-------------|----------|-------------|----------|----------|-------------|----------|
| phe.Fasting_ | rs116120727 | S9  | BRD2      | rs80334773  | S5 | KPNA3       | 6.98E-12 | 0.000284941 | 1.20E-08 | 8.15E-15 | 3.32E-07    | 7.19E-11 |
| phe.Fasting_ | rs116279995 | S20 | "PCDHGA4, | rs115787552 | S5 | KPNA3       | 3.78E-16 | 1.54E-08    | 1.23E-12 | 4.20E-14 | 1.71E-06    | 2.93E-10 |
| phe.Fasting_ | rs116279995 | S20 | "PCDHGA4, | rs115888477 | S8 | NA          | 2.72E-15 | 1.11E-07    | 7.62E-12 | 7.36E-15 | 3.00E-07    | 6.53E-11 |
| phe.Fasting_ | rs116279995 | S20 | "PCDHGA4, | rs116079984 | S8 | KPNA3       | 3.78E-16 | 1.54E-08    | 1.23E-12 | 4.48E-14 | 1.82E-06    | 3.11E-10 |
| phe.Fasting_ | rs116279995 | S20 | "PCDHGA4, | rs116548615 | S8 | TMEM45B     | 2.04E-17 | 8.34E-10    | 1.43E-13 | 7.86E-12 | 0.000320069 | 2.98E-08 |
| phe.Fasting_ | rs116279995 | S20 | "PCDHGA4, | rs146815317 | S5 | KPNA3       | 3.78E-16 | 1.54E-08    | 1.23E-12 | 4.20E-14 | 1.71E-06    | 2.93E-10 |
| phe.Fasting_ | rs116279995 | S20 | "PCDHGA4, | rs150117838 | S8 | KPNA3       | 3.78E-16 | 1.54E-08    | 1.23E-12 | 3.89E-14 | 1.58E-06    | 2.77E-10 |
| phe.Fasting_ | rs116279995 | S20 | "PCDHGA4, | rs77798597  | S7 | KPNA3       | 3.78E-16 | 1.54E-08    | 1.23E-12 | 3.89E-14 | 1.58E-06    | 2.77E-10 |
| phe.Fasting_ | rs116279995 | S20 | "PCDHGA4, | rs78736524  | S5 | KPNA3       | 3.78E-16 | 1.54E-08    | 1.23E-12 | 4.20E-14 | 1.71E-06    | 2.93E-10 |
| phe.Fasting_ | rs116279995 | S20 | "PCDHGA4, | rs79781495  | S8 | KPNA3       | 3.78E-16 | 1.54E-08    | 1.23E-12 | 3.89E-14 | 1.58E-06    | 2.77E-10 |
| phe.Fasting_ | rs116279995 | S20 | "PCDHGA4, | rs80332465  | S5 | KPNA3       | 4.04E-16 | 1.65E-08    | 1.31E-12 | 4.20E-14 | 1.71E-06    | 2.93E-10 |
| phe.Fasting_ | rs116279995 | S20 | "PCDHGA4, | rs80334773  | S5 | KPNA3       | 4.04E-16 | 1.65E-08    | 1.31E-12 | 4.20E-14 | 1.71E-06    | 2.93E-10 |
| phe.Fasting_ | rs116406581 | S2  | NA        | rs73619637  | S8 | NA          | 1.39E-13 | 5.67E-06    | 3.13E-10 | 4.17E-11 | 0.00169584  | 1.37E-07 |
| phe.Fasting_ | rs116548615 | S8  | TMEM45B   | rs73619637  | S8 | NA          | 1.70E-16 | 6.94E-09    | 6.08E-13 | 2.12E-17 | 8.64E-10    | 2.33E-12 |
| phe.Fasting_ | rs116696844 | S3  | AP3M2     | rs73619637  | S8 | NA          | 4.88E-14 | 1.99E-06    | 1.15E-10 | 5.78E-11 | 0.0023523   | 1.85E-07 |
| phe.Fasting_ | rs11989304  | S4  | TMEM64    | rs73392640  | S8 | POLR3B      | 1.29E-10 | 0.00525587  | 1.64E-07 | 9.02E-11 | 0.00367219  | 2.78E-07 |
| phe.Fasting_ | rs12488988  | S6  | PHC3      | rs116011837 | S9 | BRD2        | 2.70E-13 | 1.10E-05    | 5.81E-10 | 2.12E-11 | 0.000862671 | 7.46E-08 |
| phe.Fasting_ | rs12488988  | S6  | PHC3      | rs116120727 | S9 | BRD2        | 2.70E-13 | 1.10E-05    | 5.81E-10 | 2.12E-11 | 0.000862671 | 7.46E-08 |
| phe.Fasting_ | rs12488988  | S6  | PHC3      | rs141926074 | S8 | ATE1        | 1.23E-19 | 5.04E-12    | 2.23E-14 | 1.38E-11 | 0.000560103 | 5.00E-08 |
| phe.Fasting_ | rs12492606  | S8  | PHC3      | rs116011837 | S9 | BRD2        | 2.70E-13 | 1.10E-05    | 5.81E-10 | 2.07E-11 | 0.000841008 | 7.31E-08 |
| phe.Fasting_ | rs12492606  | S8  | PHC3      | rs116120727 | S9 | BRD2        | 2.70E-13 | 1.10E-05    | 5.81E-10 | 2.07E-11 | 0.000841008 | 7.31E-08 |
| phe.Fasting_ | rs12492606  | S8  | PHC3      | rs141926074 | S8 | ATE1        | 1.23E-19 | 5.04E-12    | 2.23E-14 | 1.34E-11 | 0.000545558 | 4.89E-08 |
| phe.Fasting_ | rs12581352  | S2  | NA        | rs139070959 | S8 | RPN2        | 1.02E-17 | 4.16E-10    | 9.76E-14 | 6.94E-15 | 2.83E-07    | 6.20E-11 |
| phe.Fasting_ | rs12581352  | S2  | NA        | rs145412529 | S8 | "RBL1,RPS3A | 5.94E-18 | 2.43E-10    | 7.36E-14 | 7.73E-15 | 3.15E-07    | 6.86E-11 |
| phe.Fasting_ | rs13400525  | S8  | MFF       | rs57503635  | S3 | NA          | 1.05E-16 | 4.30E-09    | 4.46E-13 | 2.22E-32 | 9.05E-25    | 4.52E-25 |
| phe.Fasting_ | rs138090701 | S5  | HDAC3     | rs115787552 | S5 | KPNA3       | 4.18E-16 | 1.71E-08    | 1.35E-12 | 1.29E-10 | 0.00525904  | 3.89E-07 |
| phe.Fasting_ | rs138090701 | S5  | HDAC3     | rs115888477 | S8 | NA          | 3.16E-15 | 1.29E-07    | 8.58E-12 | 1.17E-11 | 0.000475361 | 4.28E-08 |
| phe.Fasting_ | rs138090701 | S5  | HDAC3     | rs116011837 | S9 | BRD2        | 5.65E-12 | 0.000230913 | 9.97E-09 | 1.74E-13 | 7.08E-06    | 9.84E-10 |
| phe.Fasting_ | rs138090701 | S5  | HDAC3     | rs116079984 | S8 | KPNA3       | 4.18E-16 | 1.71E-08    | 1.35E-12 | 1.42E-10 | 0.00579174  | 4.27E-07 |
| phe.Fasting_ | rs138090701 | S5  | HDAC3     | rs116120727 | S9 | BRD2        | 5.65E-12 | 0.000230913 | 9.97E-09 | 1.74E-13 | 7.08E-06    | 9.84E-10 |
| phe.Fasting_ | rs138090701 | S5  | HDAC3     | rs116548615 | S8 | TMEM45B     | 2.13E-17 | 8.70E-10    | 1.43E-13 | 1.27E-11 | 0.000515572 | 4.64E-08 |
| phe.Fasting_ | rs138090701 | S5  | HDAC3     | rs146815317 | S5 | KPNA3       | 4.18E-16 | 1.71E-08    | 1.35E-12 | 1.29E-10 | 0.00525904  | 3.89E-07 |
| phe.Fasting_ | rs138090701 | S5  | HDAC3     | rs150117838 | S8 | KPNA3       | 4.18E-16 | 1.71E-08    | 1.35E-12 | 1.21E-10 | 0.00493898  | 3.67E-07 |
| phe.Fasting_ | rs138090701 | S5  | HDAC3     | rs57503635  | S3 | NA          | 8.68E-17 | 3.54E-09    | 3.77E-13 | 2.76E-14 | 1.12E-06    | 2.08E-10 |
| phe.Fasting_ | rs138090701 | S5  | HDAC3     | rs7763107   | S8 | FARS2       | 7.46E-17 | 3.04E-09    | 3.33E-13 | 8.38E-12 | 0.000340946 | 3.15E-08 |
| phe.Fasting_ | rs138090701 | S5  | HDAC3     | rs77798597  | S7 | KPNA3       | 4.18E-16 | 1.71E-08    | 1.35E-12 | 1.21E-10 | 0.00493898  | 3.67E-07 |
| phe.Fasting_ | rs138090701 | S5  | HDAC3     | rs78736524  | S5 | KPNA3       | 4.18E-16 | 1.71E-08    | 1.35E-12 | 1.29E-10 | 0.00525904  | 3.89E-07 |
| phe.Fasting_ | rs138090701 | S5  | HDAC3     | rs79781495  | S8 | KPNA3       | 4.18E-16 | 1.71E-08    | 1.35E-12 | 1.21E-10 | 0.00493898  | 3.67E-07 |
| phe.Fasting_ | rs138090701 | S5  | HDAC3     | rs80332465  | S5 | KPNA3       | 4.42E-16 | 1.80E-08    | 1.42E-12 | 1.29E-10 | 0.00523542  | 3.88E-07 |
| phe.Fasting_ | rs138090701 | S5  | HDAC3     | rs80334773  | S5 | KPNA3       | 4.42E-16 | 1.80E-08    | 1.42E-12 | 1.29E-10 | 0.00523542  | 3.88E-07 |



|              |                |        |                |           |          |             |          |          |             |          |
|--------------|----------------|--------|----------------|-----------|----------|-------------|----------|----------|-------------|----------|
| phe.Fasting_ | rs138136869S7  | DIAPH1 | rs112089881S8  | ZFAND4    | 3.24E-18 | 1.32E-10    | 5.45E-14 | 1.95E-10 | 0.00795558  | 5.56E-07 |
| phe.Fasting_ | rs138136869S7  | DIAPH1 | rs115787552S5  | KPNA3     | 5.05E-16 | 2.06E-08    | 1.59E-12 | 2.34E-14 | 9.53E-07    | 1.79E-10 |
| phe.Fasting_ | rs138136869S7  | DIAPH1 | rs115888477S8  | NA        | 3.68E-15 | 1.50E-07    | 9.90E-12 | 4.11E-15 | 1.67E-07    | 3.84E-11 |
| phe.Fasting_ | rs138136869S7  | DIAPH1 | rs116011837S9  | BRD2      | 9.60E-12 | 0.000392176 | 1.53E-08 | 9.05E-15 | 3.68E-07    | 7.90E-11 |
| phe.Fasting_ | rs138136869S7  | DIAPH1 | rs116079984S8  | KPNA3     | 5.05E-16 | 2.06E-08    | 1.59E-12 | 2.56E-14 | 1.04E-06    | 1.94E-10 |
| phe.Fasting_ | rs138136869S7  | DIAPH1 | rs116120727S9  | BRD2      | 9.60E-12 | 0.000392176 | 1.53E-08 | 9.05E-15 | 3.68E-07    | 7.90E-11 |
| phe.Fasting_ | rs138136869S7  | DIAPH1 | rs116548615S8  | TMEM45B   | 2.95E-17 | 1.21E-09    | 1.69E-13 | 1.76E-12 | 7.17E-05    | 7.72E-09 |
| phe.Fasting_ | rs138136869S7  | DIAPH1 | rs146815317S5  | KPNA3     | 5.05E-16 | 2.06E-08    | 1.59E-12 | 2.34E-14 | 9.53E-07    | 1.79E-10 |
| phe.Fasting_ | rs138136869S7  | DIAPH1 | rs150117838S8  | KPNA3     | 5.05E-16 | 2.06E-08    | 1.59E-12 | 2.16E-14 | 8.80E-07    | 1.71E-10 |
| phe.Fasting_ | rs138136869S7  | DIAPH1 | rs16894241 S4  | HIST1H2BK | 3.73E-12 | 0.000152384 | 6.73E-09 | 6.62E-15 | 2.69E-07    | 5.94E-11 |
| phe.Fasting_ | rs138136869S7  | DIAPH1 | rs57503635 S3  | NA        | 1.28E-16 | 5.23E-09    | 5.19E-13 | 6.61E-15 | 2.69E-07    | 5.94E-11 |
| phe.Fasting_ | rs138136869S7  | DIAPH1 | rs7256517 S7   | CYTH2     | 1.59E-16 | 6.48E-09    | 6.03E-13 | 9.69E-13 | 3.95E-05    | 4.59E-09 |
| phe.Fasting_ | rs138136869S7  | DIAPH1 | rs73392640 S8  | POLR3B    | 4.58E-11 | 0.00187102  | 6.24E-08 | 6.82E-12 | 0.000277641 | 2.62E-08 |
| phe.Fasting_ | rs138136869S7  | DIAPH1 | rs74914207 S24 | NA        | 2.89E-11 | 0.00117833  | 4.13E-08 | 1.56E-11 | 0.000634366 | 5.60E-08 |
| phe.Fasting_ | rs138136869S7  | DIAPH1 | rs75758702 S24 | NA        | 1.04E-17 | 4.25E-10    | 9.89E-14 | 2.85E-11 | 0.00115844  | 9.77E-08 |
| phe.Fasting_ | rs138136869S7  | DIAPH1 | rs7763107 S8   | FARS2     | 9.44E-17 | 3.86E-09    | 4.06E-13 | 1.60E-12 | 6.52E-05    | 7.13E-09 |
| phe.Fasting_ | rs138136869S7  | DIAPH1 | rs77798597 S7  | KPNA3     | 5.05E-16 | 2.06E-08    | 1.59E-12 | 2.16E-14 | 8.80E-07    | 1.71E-10 |
| phe.Fasting_ | rs138136869S7  | DIAPH1 | rs78697063 S5  | MSI2      | 7.77E-20 | 3.17E-12    | 2.23E-14 | 1.45E-10 | 0.00591847  | 4.35E-07 |
| phe.Fasting_ | rs138136869S7  | DIAPH1 | rs78736524 S5  | KPNA3     | 5.05E-16 | 2.06E-08    | 1.59E-12 | 2.34E-14 | 9.53E-07    | 1.79E-10 |
| phe.Fasting_ | rs138136869S7  | DIAPH1 | rs79781495 S8  | KPNA3     | 5.05E-16 | 2.06E-08    | 1.59E-12 | 2.16E-14 | 8.80E-07    | 1.71E-10 |
| phe.Fasting_ | rs138136869S7  | DIAPH1 | rs80332465 S5  | KPNA3     | 5.36E-16 | 2.19E-08    | 1.67E-12 | 2.32E-14 | 9.45E-07    | 1.79E-10 |
| phe.Fasting_ | rs138136869S7  | DIAPH1 | rs80334773 S5  | KPNA3     | 5.36E-16 | 2.19E-08    | 1.67E-12 | 2.32E-14 | 9.45E-07    | 1.79E-10 |
| phe.Fasting_ | rs138457103S10 | DIAPH1 | rs115787552S5  | KPNA3     | 1.71E-15 | 7.00E-08    | 4.90E-12 | 1.02E-13 | 4.14E-06    | 6.47E-10 |
| phe.Fasting_ | rs138457103S10 | DIAPH1 | rs115888477S8  | NA        | 1.18E-14 | 4.83E-07    | 3.01E-11 | 1.96E-14 | 7.99E-07    | 1.58E-10 |
| phe.Fasting_ | rs138457103S10 | DIAPH1 | rs116011837S9  | BRD2      | 2.95E-11 | 0.00120633  | 4.18E-08 | 2.52E-14 | 1.02E-06    | 1.91E-10 |
| phe.Fasting_ | rs138457103S10 | DIAPH1 | rs116079984S8  | KPNA3     | 1.71E-15 | 7.00E-08    | 4.90E-12 | 1.13E-13 | 4.62E-06    | 7.01E-10 |
| phe.Fasting_ | rs138457103S10 | DIAPH1 | rs116120727S9  | BRD2      | 2.95E-11 | 0.00120633  | 4.18E-08 | 2.52E-14 | 1.02E-06    | 1.91E-10 |
| phe.Fasting_ | rs138457103S10 | DIAPH1 | rs146815317S5  | KPNA3     | 1.71E-15 | 7.00E-08    | 4.90E-12 | 1.02E-13 | 4.14E-06    | 6.47E-10 |
| phe.Fasting_ | rs138457103S10 | DIAPH1 | rs150117838S8  | KPNA3     | 1.71E-15 | 7.00E-08    | 4.90E-12 | 9.90E-14 | 4.03E-06    | 6.40E-10 |
| phe.Fasting_ | rs138457103S10 | DIAPH1 | rs57503635 S3  | NA        | 3.60E-16 | 1.47E-08    | 1.18E-12 | 2.95E-14 | 1.20E-06    | 2.20E-10 |
| phe.Fasting_ | rs138457103S10 | DIAPH1 | rs73619637 S8  | NA        | 7.71E-16 | 3.15E-08    | 2.35E-12 | 1.95E-10 | 0.00792645  | 5.55E-07 |
| phe.Fasting_ | rs138457103S10 | DIAPH1 | rs74914207 S24 | NA        | 8.07E-11 | 0.00329638  | 1.06E-07 | 1.19E-10 | 0.00483577  | 3.60E-07 |
| phe.Fasting_ | rs138457103S10 | DIAPH1 | rs75758702 S24 | NA        | 3.96E-17 | 1.62E-09    | 2.13E-13 | 1.49E-10 | 0.00606828  | 4.45E-07 |
| phe.Fasting_ | rs138457103S10 | DIAPH1 | rs7763107 S8   | FARS2     | 3.51E-16 | 1.44E-08    | 1.15E-12 | 8.67E-12 | 0.000352898 | 3.26E-08 |
| phe.Fasting_ | rs138457103S10 | DIAPH1 | rs77798597 S7  | KPNA3     | 1.71E-15 | 7.00E-08    | 4.90E-12 | 9.90E-14 | 4.03E-06    | 6.40E-10 |
| phe.Fasting_ | rs138457103S10 | DIAPH1 | rs78516788 S8  | SLC38A1   | 1.62E-11 | 0.000660642 | 2.47E-08 | 2.25E-10 | 0.00916486  | 6.30E-07 |
| phe.Fasting_ | rs138457103S10 | DIAPH1 | rs78736524 S5  | KPNA3     | 1.71E-15 | 7.00E-08    | 4.90E-12 | 1.02E-13 | 4.14E-06    | 6.47E-10 |
| phe.Fasting_ | rs138457103S10 | DIAPH1 | rs79781495 S8  | KPNA3     | 1.71E-15 | 7.00E-08    | 4.90E-12 | 9.90E-14 | 4.03E-06    | 6.40E-10 |
| phe.Fasting_ | rs138457103S10 | DIAPH1 | rs80332465 S5  | KPNA3     | 1.81E-15 | 7.41E-08    | 5.18E-12 | 1.07E-13 | 4.34E-06    | 6.76E-10 |
| phe.Fasting_ | rs138457103S10 | DIAPH1 | rs80334773 S5  | KPNA3     | 1.81E-15 | 7.41E-08    | 5.18E-12 | 1.07E-13 | 4.34E-06    | 6.76E-10 |

|              |             |     |           |             |             |           |           |             |             |          |             |             |          |
|--------------|-------------|-----|-----------|-------------|-------------|-----------|-----------|-------------|-------------|----------|-------------|-------------|----------|
| phe.Fasting_ | rs138487229 | S11 | DIAPH1    | rs115787552 | S5          | KPNA3     | 2.97E-15  | 1.21E-07    | 8.14E-12    | 1.18E-13 | 4.80E-06    | 7.06E-10    |          |
| phe.Fasting_ | rs138487229 | S11 | DIAPH1    | rs115888477 | S8          | NA        | 2.03E-14  | 8.28E-07    | 5.02E-11    | 2.21E-14 | 8.99E-07    | 1.73E-10    |          |
| phe.Fasting_ | rs138487229 | S11 | DIAPH1    | rs116011837 | S9          | BRD2      | 4.89E-11  | 0.00199774  | 6.62E-08    | 4.07E-14 | 1.66E-06    | 2.85E-10    |          |
| phe.Fasting_ | rs138487229 | S11 | DIAPH1    | rs116079984 | S8          | KPNA3     | 2.97E-15  | 1.21E-07    | 8.14E-12    | 1.24E-13 | 5.04E-06    | 7.34E-10    |          |
| phe.Fasting_ | rs138487229 | S11 | DIAPH1    | rs116120727 | S9          | BRD2      | 4.89E-11  | 0.00199774  | 6.62E-08    | 4.07E-14 | 1.66E-06    | 2.85E-10    |          |
| phe.Fasting_ | rs138487229 | S11 | DIAPH1    | rs116548615 | S8          | TMEM45B   | 1.73E-16  | 7.06E-09    | 6.15E-13    | 8.70E-12 | 0.000354153 | 3.26E-08    |          |
| phe.Fasting_ | rs138487229 | S11 | DIAPH1    | rs146815317 | S5          | KPNA3     | 2.97E-15  | 1.21E-07    | 8.14E-12    | 1.18E-13 | 4.80E-06    | 7.06E-10    |          |
| phe.Fasting_ | rs138487229 | S11 | DIAPH1    | rs150117838 | S8          | KPNA3     | 2.97E-15  | 1.21E-07    | 8.14E-12    | 1.09E-13 | 4.44E-06    | 6.79E-10    |          |
| phe.Fasting_ | rs138487229 | S11 | DIAPH1    | rs16894241  | S4          | HIST1H2BK | 1.99E-11  | 0.000812315 | 2.96E-08    | 3.44E-14 | 1.40E-06    | 2.50E-10    |          |
| phe.Fasting_ | rs138487229 | S11 | DIAPH1    | rs57503635  | S3          | NA        | 6.34E-16  | 2.59E-08    | 1.95E-12    | 3.17E-14 | 1.29E-06    | 2.34E-10    |          |
| phe.Fasting_ | rs138487229 | S11 | DIAPH1    | rs7256517   | S7          | CYTH2     | 1.04E-15  | 4.24E-08    | 3.06E-12    | 4.82E-12 | 0.000196022 | 1.91E-08    |          |
| phe.Fasting_ | rs138487229 | S11 | DIAPH1    | rs73392640  | S8          | POLR3B    | 2.02E-10  | 0.00826001  | 2.49E-07    | 5.19E-11 | 0.00211214  | 1.67E-07    |          |
| phe.Fasting_ | rs138487229 | S11 | DIAPH1    | rs73619637  | S8          | NA        | 1.44E-15  | 5.89E-08    | 4.14E-12    | 2.05E-10 | 0.00833668  | 5.78E-07    |          |
| phe.Fasting_ | rs138487229 | S11 | DIAPH1    | rs74914207  | S24         | NA        | 1.37E-10  | 0.00558626  | 1.73E-07    | 9.12E-11 | 0.0037135   | 2.80E-07    |          |
| phe.Fasting_ | rs138487229 | S11 | DIAPH1    | rs75758702  | S24         | NA        | 7.02E-17  | 2.87E-09    | 3.16E-13    | 1.57E-10 | 0.00638323  | 4.59E-07    |          |
| phe.Fasting_ | rs138487229 | S11 | DIAPH1    | rs7763107   | S8          | FARS2     | 5.78E-16  | 2.36E-08    | 1.79E-12    | 9.23E-12 | 0.000375564 | 3.44E-08    |          |
| phe.Fasting_ | rs138487229 | S11 | DIAPH1    | rs77798597  | S7          | KPNA3     | 2.97E-15  | 1.21E-07    | 8.14E-12    | 1.09E-13 | 4.44E-06    | 6.79E-10    |          |
| phe.Fasting_ | rs138487229 | S11 | DIAPH1    | rs78516788  | S8          | SLC38A1   | 2.75E-11  | 0.00112269  | 3.94E-08    | 2.44E-10 | 0.00992686  | 6.74E-07    |          |
| phe.Fasting_ | rs138487229 | S11 | DIAPH1    | rs78736524  | S5          | KPNA3     | 2.97E-15  | 1.21E-07    | 8.14E-12    | 1.18E-13 | 4.80E-06    | 7.06E-10    |          |
| phe.Fasting_ | rs138487229 | S11 | DIAPH1    | rs79781495  | S8          | KPNA3     | 2.97E-15  | 1.21E-07    | 8.14E-12    | 1.09E-13 | 4.44E-06    | 6.79E-10    |          |
| phe.Fasting_ | rs138487229 | S11 | DIAPH1    | rs80332465  | S5          | KPNA3     | 3.13E-15  | 1.28E-07    | 8.51E-12    | 1.17E-13 | 4.77E-06    | 7.06E-10    |          |
| phe.Fasting_ | rs138487229 | S11 | DIAPH1    | rs80334773  | S5          | KPNA3     | 3.13E-15  | 1.28E-07    | 8.51E-12    | 1.17E-13 | 4.77E-06    | 7.06E-10    |          |
| phe.Fasting_ | rs138738950 | S8  | "PCDHGB2, | P           | rs115787552 | S5        | KPNA3     | 2.97E-15    | 1.21E-07    | 8.14E-12 | 1.20E-13    | 4.88E-06    | 7.16E-10 |
| phe.Fasting_ | rs138738950 | S8  | "PCDHGB2, | P           | rs115888477 | S8        | NA        | 2.03E-14    | 8.28E-07    | 5.02E-11 | 2.24E-14    | 9.14E-07    | 1.76E-10 |
| phe.Fasting_ | rs138738950 | S8  | "PCDHGB2, | P           | rs116011837 | S9        | BRD2      | 4.89E-11    | 0.00199774  | 6.62E-08 | 5.22E-14    | 2.12E-06    | 3.61E-10 |
| phe.Fasting_ | rs138738950 | S8  | "PCDHGB2, | P           | rs116079984 | S8        | KPNA3     | 2.97E-15    | 1.21E-07    | 8.14E-12 | 1.26E-13    | 5.11E-06    | 7.44E-10 |
| phe.Fasting_ | rs138738950 | S8  | "PCDHGB2, | P           | rs116120727 | S9        | BRD2      | 4.89E-11    | 0.00199774  | 6.62E-08 | 5.22E-14    | 2.12E-06    | 3.61E-10 |
| phe.Fasting_ | rs138738950 | S8  | "PCDHGB2, | P           | rs116548615 | S8        | TMEM45B   | 1.73E-16    | 7.06E-09    | 6.15E-13 | 8.70E-12    | 0.000354038 | 3.26E-08 |
| phe.Fasting_ | rs138738950 | S8  | "PCDHGB2, | P           | rs146815317 | S5        | KPNA3     | 2.97E-15    | 1.21E-07    | 8.14E-12 | 1.20E-13    | 4.88E-06    | 7.16E-10 |
| phe.Fasting_ | rs138738950 | S8  | "PCDHGB2, | P           | rs150117838 | S8        | KPNA3     | 2.97E-15    | 1.21E-07    | 8.14E-12 | 1.11E-13    | 4.50E-06    | 6.84E-10 |
| phe.Fasting_ | rs138738950 | S8  | "PCDHGB2, | P           | rs16894241  | S4        | HIST1H2BK | 1.99E-11    | 0.000812315 | 2.96E-08 | 3.48E-14    | 1.42E-06    | 2.52E-10 |
| phe.Fasting_ | rs138738950 | S8  | "PCDHGB2, | P           | rs57503635  | S3        | NA        | 6.34E-16    | 2.59E-08    | 1.95E-12 | 3.21E-14    | 1.31E-06    | 2.36E-10 |
| phe.Fasting_ | rs138738950 | S8  | "PCDHGB2, | P           | rs7256517   | S7        | CYTH2     | 1.04E-15    | 4.24E-08    | 3.06E-12 | 4.87E-12    | 0.000198044 | 1.93E-08 |
| phe.Fasting_ | rs138738950 | S8  | "PCDHGB2, | P           | rs73392640  | S8        | POLR3B    | 2.02E-10    | 0.00826001  | 2.49E-07 | 5.19E-11    | 0.00211253  | 1.67E-07 |
| phe.Fasting_ | rs138738950 | S8  | "PCDHGB2, | P           | rs73619637  | S8        | NA        | 1.44E-15    | 5.89E-08    | 4.14E-12 | 2.06E-10    | 0.00840276  | 5.82E-07 |
| phe.Fasting_ | rs138738950 | S8  | "PCDHGB2, | P           | rs74914207  | S24       | NA        | 1.37E-10    | 0.00558626  | 1.73E-07 | 9.14E-11    | 0.00371924  | 2.80E-07 |
| phe.Fasting_ | rs138738950 | S8  | "PCDHGB2, | P           | rs75758702  | S24       | NA        | 7.02E-17    | 2.87E-09    | 3.16E-13 | 1.58E-10    | 0.00642379  | 4.61E-07 |
| phe.Fasting_ | rs138738950 | S8  | "PCDHGB2, | P           | rs7763107   | S8        | FARS2     | 5.78E-16    | 2.36E-08    | 1.79E-12 | 9.26E-12    | 0.000376781 | 3.45E-08 |
| phe.Fasting_ | rs138738950 | S8  | "PCDHGB2, | P           | rs77798597  | S7        | KPNA3     | 2.97E-15    | 1.21E-07    | 8.14E-12 | 1.11E-13    | 4.50E-06    | 6.84E-10 |
| phe.Fasting_ | rs138738950 | S8  | "PCDHGB2, | P           | rs78736524  | S5        | KPNA3     | 2.97E-15    | 1.21E-07    | 8.14E-12 | 1.20E-13    | 4.88E-06    | 7.16E-10 |

|                           |                         |           |          |             |          |          |             |          |
|---------------------------|-------------------------|-----------|----------|-------------|----------|----------|-------------|----------|
| phe.Fasting_rs138738950S8 | "PCDHGB2,Prs79781495 S8 | KPNA3     | 2.97E-15 | 1.21E-07    | 8.14E-12 | 1.11E-13 | 4.50E-06    | 6.84E-10 |
| phe.Fasting_rs138738950S8 | "PCDHGB2,Prs80332465 S5 | KPNA3     | 3.13E-15 | 1.28E-07    | 8.51E-12 | 1.19E-13 | 4.84E-06    | 7.11E-10 |
| phe.Fasting_rs138738950S8 | "PCDHGB2,Prs80334773 S5 | KPNA3     | 3.13E-15 | 1.28E-07    | 8.51E-12 | 1.19E-13 | 4.84E-06    | 7.11E-10 |
| phe.Fasting_rs139297927S8 | DIAPH1 rs115787552S5    | KPNA3     | 2.97E-15 | 1.21E-07    | 8.14E-12 | 1.18E-13 | 4.80E-06    | 7.06E-10 |
| phe.Fasting_rs139297927S8 | DIAPH1 rs115888477S8    | NA        | 2.03E-14 | 8.28E-07    | 5.02E-11 | 2.21E-14 | 8.99E-07    | 1.73E-10 |
| phe.Fasting_rs139297927S8 | DIAPH1 rs116011837S9    | BRD2      | 4.89E-11 | 0.00199774  | 6.62E-08 | 4.07E-14 | 1.66E-06    | 2.85E-10 |
| phe.Fasting_rs139297927S8 | DIAPH1 rs116079984S8    | KPNA3     | 2.97E-15 | 1.21E-07    | 8.14E-12 | 1.24E-13 | 5.04E-06    | 7.34E-10 |
| phe.Fasting_rs139297927S8 | DIAPH1 rs116120727S9    | BRD2      | 4.89E-11 | 0.00199774  | 6.62E-08 | 4.07E-14 | 1.66E-06    | 2.85E-10 |
| phe.Fasting_rs139297927S8 | DIAPH1 rs116548615S8    | TMEM45B   | 1.73E-16 | 7.06E-09    | 6.15E-13 | 8.70E-12 | 0.000354153 | 3.26E-08 |
| phe.Fasting_rs139297927S8 | DIAPH1 rs146815317S5    | KPNA3     | 2.97E-15 | 1.21E-07    | 8.14E-12 | 1.18E-13 | 4.80E-06    | 7.06E-10 |
| phe.Fasting_rs139297927S8 | DIAPH1 rs150117838S8    | KPNA3     | 2.97E-15 | 1.21E-07    | 8.14E-12 | 1.09E-13 | 4.44E-06    | 6.79E-10 |
| phe.Fasting_rs139297927S8 | DIAPH1 rs16894241 S4    | HIST1H2BK | 1.99E-11 | 0.000812315 | 2.96E-08 | 3.44E-14 | 1.40E-06    | 2.50E-10 |
| phe.Fasting_rs139297927S8 | DIAPH1 rs57503635 S3    | NA        | 6.34E-16 | 2.59E-08    | 1.95E-12 | 3.17E-14 | 1.29E-06    | 2.34E-10 |
| phe.Fasting_rs139297927S8 | DIAPH1 rs7256517 S7     | CYTH2     | 1.04E-15 | 4.24E-08    | 3.06E-12 | 4.82E-12 | 0.000196022 | 1.91E-08 |
| phe.Fasting_rs139297927S8 | DIAPH1 rs73392640 S8    | POLR3B    | 2.02E-10 | 0.00826001  | 2.49E-07 | 5.19E-11 | 0.00211214  | 1.67E-07 |
| phe.Fasting_rs139297927S8 | DIAPH1 rs73619637 S8    | NA        | 1.44E-15 | 5.89E-08    | 4.14E-12 | 2.05E-10 | 0.00833668  | 5.78E-07 |
| phe.Fasting_rs139297927S8 | DIAPH1 rs74914207 S24   | NA        | 1.37E-10 | 0.00558626  | 1.73E-07 | 9.12E-11 | 0.0037135   | 2.80E-07 |
| phe.Fasting_rs139297927S8 | DIAPH1 rs75758702 S24   | NA        | 7.02E-17 | 2.87E-09    | 3.16E-13 | 1.57E-10 | 0.00638323  | 4.59E-07 |
| phe.Fasting_rs139297927S8 | DIAPH1 rs7763107 S8     | FARS2     | 5.78E-16 | 2.36E-08    | 1.79E-12 | 9.23E-12 | 0.000375564 | 3.44E-08 |
| phe.Fasting_rs139297927S8 | DIAPH1 rs77798597 S7    | KPNA3     | 2.97E-15 | 1.21E-07    | 8.14E-12 | 1.09E-13 | 4.44E-06    | 6.79E-10 |
| phe.Fasting_rs139297927S8 | DIAPH1 rs78516788 S8    | SLC38A1   | 2.75E-11 | 0.00112269  | 3.94E-08 | 2.44E-10 | 0.00992686  | 6.74E-07 |
| phe.Fasting_rs139297927S8 | DIAPH1 rs78736524 S5    | KPNA3     | 2.97E-15 | 1.21E-07    | 8.14E-12 | 1.18E-13 | 4.80E-06    | 7.06E-10 |
| phe.Fasting_rs139297927S8 | DIAPH1 rs79781495 S8    | KPNA3     | 2.97E-15 | 1.21E-07    | 8.14E-12 | 1.09E-13 | 4.44E-06    | 6.79E-10 |
| phe.Fasting_rs139297927S8 | DIAPH1 rs80332465 S5    | KPNA3     | 3.13E-15 | 1.28E-07    | 8.51E-12 | 1.17E-13 | 4.77E-06    | 7.06E-10 |
| phe.Fasting_rs139297927S8 | DIAPH1 rs80334773 S5    | KPNA3     | 3.13E-15 | 1.28E-07    | 8.51E-12 | 1.17E-13 | 4.77E-06    | 7.06E-10 |
| phe.Fasting_rs139337303S8 | DIAPH1 rs115787552S5    | KPNA3     | 2.97E-15 | 1.21E-07    | 8.14E-12 | 1.18E-13 | 4.80E-06    | 7.06E-10 |
| phe.Fasting_rs139337303S8 | DIAPH1 rs115888477S8    | NA        | 2.03E-14 | 8.28E-07    | 5.02E-11 | 2.21E-14 | 8.99E-07    | 1.73E-10 |
| phe.Fasting_rs139337303S8 | DIAPH1 rs116011837S9    | BRD2      | 4.89E-11 | 0.00199774  | 6.62E-08 | 4.07E-14 | 1.66E-06    | 2.85E-10 |
| phe.Fasting_rs139337303S8 | DIAPH1 rs116079984S8    | KPNA3     | 2.97E-15 | 1.21E-07    | 8.14E-12 | 1.24E-13 | 5.04E-06    | 7.34E-10 |
| phe.Fasting_rs139337303S8 | DIAPH1 rs116120727S9    | BRD2      | 4.89E-11 | 0.00199774  | 6.62E-08 | 4.07E-14 | 1.66E-06    | 2.85E-10 |
| phe.Fasting_rs139337303S8 | DIAPH1 rs116548615S8    | TMEM45B   | 1.73E-16 | 7.06E-09    | 6.15E-13 | 8.70E-12 | 0.000354153 | 3.26E-08 |
| phe.Fasting_rs139337303S8 | DIAPH1 rs146815317S5    | KPNA3     | 2.97E-15 | 1.21E-07    | 8.14E-12 | 1.18E-13 | 4.80E-06    | 7.06E-10 |
| phe.Fasting_rs139337303S8 | DIAPH1 rs150117838S8    | KPNA3     | 2.97E-15 | 1.21E-07    | 8.14E-12 | 1.09E-13 | 4.44E-06    | 6.79E-10 |
| phe.Fasting_rs139337303S8 | DIAPH1 rs16894241 S4    | HIST1H2BK | 1.99E-11 | 0.000812315 | 2.96E-08 | 3.44E-14 | 1.40E-06    | 2.50E-10 |
| phe.Fasting_rs139337303S8 | DIAPH1 rs57503635 S3    | NA        | 6.34E-16 | 2.59E-08    | 1.95E-12 | 3.17E-14 | 1.29E-06    | 2.34E-10 |
| phe.Fasting_rs139337303S8 | DIAPH1 rs7256517 S7     | CYTH2     | 1.04E-15 | 4.24E-08    | 3.06E-12 | 4.82E-12 | 0.000196022 | 1.91E-08 |
| phe.Fasting_rs139337303S8 | DIAPH1 rs73392640 S8    | POLR3B    | 2.02E-10 | 0.00826001  | 2.49E-07 | 5.19E-11 | 0.00211214  | 1.67E-07 |
| phe.Fasting_rs139337303S8 | DIAPH1 rs73619637 S8    | NA        | 1.44E-15 | 5.89E-08    | 4.14E-12 | 2.05E-10 | 0.00833668  | 5.78E-07 |
| phe.Fasting_rs139337303S8 | DIAPH1 rs74914207 S24   | NA        | 1.37E-10 | 0.00558626  | 1.73E-07 | 9.12E-11 | 0.0037135   | 2.80E-07 |
| phe.Fasting_rs139337303S8 | DIAPH1 rs75758702 S24   | NA        | 7.02E-17 | 2.87E-09    | 3.16E-13 | 1.57E-10 | 0.00638323  | 4.59E-07 |

|              |             |     |                        |             |           |           |             |             |          |             |             |          |
|--------------|-------------|-----|------------------------|-------------|-----------|-----------|-------------|-------------|----------|-------------|-------------|----------|
| phe.Fasting_ | rs139337303 | S8  | DIAPH1                 | rs7763107   | S8        | FARS2     | 5.78E-16    | 2.36E-08    | 1.79E-12 | 9.23E-12    | 0.000375564 | 3.44E-08 |
| phe.Fasting_ | rs139337303 | S8  | DIAPH1                 | rs77798597  | S7        | KPNA3     | 2.97E-15    | 1.21E-07    | 8.14E-12 | 1.09E-13    | 4.44E-06    | 6.79E-10 |
| phe.Fasting_ | rs139337303 | S8  | DIAPH1                 | rs78516788  | S8        | SLC38A1   | 2.75E-11    | 0.00112269  | 3.94E-08 | 2.44E-10    | 0.00992686  | 6.74E-07 |
| phe.Fasting_ | rs139337303 | S8  | DIAPH1                 | rs78736524  | S5        | KPNA3     | 2.97E-15    | 1.21E-07    | 8.14E-12 | 1.18E-13    | 4.80E-06    | 7.06E-10 |
| phe.Fasting_ | rs139337303 | S8  | DIAPH1                 | rs79781495  | S8        | KPNA3     | 2.97E-15    | 1.21E-07    | 8.14E-12 | 1.09E-13    | 4.44E-06    | 6.79E-10 |
| phe.Fasting_ | rs139337303 | S8  | DIAPH1                 | rs80332465  | S5        | KPNA3     | 3.13E-15    | 1.28E-07    | 8.51E-12 | 1.17E-13    | 4.77E-06    | 7.06E-10 |
| phe.Fasting_ | rs139337303 | S8  | DIAPH1                 | rs80334773  | S5        | KPNA3     | 3.13E-15    | 1.28E-07    | 8.51E-12 | 1.17E-13    | 4.77E-06    | 7.06E-10 |
| phe.Fasting_ | rs139403963 | S8  | DIAPH1                 | rs112089881 | S8        | ZFAND4    | 3.24E-18    | 1.32E-10    | 5.45E-14 | 1.95E-10    | 0.00795558  | 5.56E-07 |
| phe.Fasting_ | rs139403963 | S8  | DIAPH1                 | rs115787552 | S5        | KPNA3     | 5.05E-16    | 2.06E-08    | 1.59E-12 | 2.34E-14    | 9.53E-07    | 1.79E-10 |
| phe.Fasting_ | rs139403963 | S8  | DIAPH1                 | rs115888477 | S8        | NA        | 3.68E-15    | 1.50E-07    | 9.90E-12 | 4.11E-15    | 1.67E-07    | 3.84E-11 |
| phe.Fasting_ | rs139403963 | S8  | DIAPH1                 | rs116011837 | S9        | BRD2      | 9.60E-12    | 0.000392176 | 1.53E-08 | 9.05E-15    | 3.68E-07    | 7.90E-11 |
| phe.Fasting_ | rs139403963 | S8  | DIAPH1                 | rs116079984 | S8        | KPNA3     | 5.05E-16    | 2.06E-08    | 1.59E-12 | 2.56E-14    | 1.04E-06    | 1.94E-10 |
| phe.Fasting_ | rs139403963 | S8  | DIAPH1                 | rs116120727 | S9        | BRD2      | 9.60E-12    | 0.000392176 | 1.53E-08 | 9.05E-15    | 3.68E-07    | 7.90E-11 |
| phe.Fasting_ | rs139403963 | S8  | DIAPH1                 | rs116548615 | S8        | TMEM45B   | 2.95E-17    | 1.21E-09    | 1.69E-13 | 1.76E-12    | 7.17E-05    | 7.72E-09 |
| phe.Fasting_ | rs139403963 | S8  | DIAPH1                 | rs146815317 | S5        | KPNA3     | 5.05E-16    | 2.06E-08    | 1.59E-12 | 2.34E-14    | 9.53E-07    | 1.79E-10 |
| phe.Fasting_ | rs139403963 | S8  | DIAPH1                 | rs150117838 | S8        | KPNA3     | 5.05E-16    | 2.06E-08    | 1.59E-12 | 2.16E-14    | 8.80E-07    | 1.71E-10 |
| phe.Fasting_ | rs139403963 | S8  | DIAPH1                 | rs16894241  | S4        | HIST1H2BK | 3.73E-12    | 0.000152384 | 6.73E-09 | 6.62E-15    | 2.69E-07    | 5.94E-11 |
| phe.Fasting_ | rs139403963 | S8  | DIAPH1                 | rs57503635  | S3        | NA        | 1.28E-16    | 5.23E-09    | 5.19E-13 | 6.61E-15    | 2.69E-07    | 5.94E-11 |
| phe.Fasting_ | rs139403963 | S8  | DIAPH1                 | rs7256517   | S7        | CYTH2     | 1.59E-16    | 6.48E-09    | 6.03E-13 | 9.69E-13    | 3.95E-05    | 4.59E-09 |
| phe.Fasting_ | rs139403963 | S8  | DIAPH1                 | rs73392640  | S8        | POLR3B    | 4.58E-11    | 0.00187102  | 6.24E-08 | 6.82E-12    | 0.000277641 | 2.62E-08 |
| phe.Fasting_ | rs139403963 | S8  | DIAPH1                 | rs74914207  | S24       | NA        | 2.89E-11    | 0.00117833  | 4.13E-08 | 1.56E-11    | 0.000634366 | 5.60E-08 |
| phe.Fasting_ | rs139403963 | S8  | DIAPH1                 | rs75758702  | S24       | NA        | 1.04E-17    | 4.25E-10    | 9.89E-14 | 2.85E-11    | 0.00115844  | 9.77E-08 |
| phe.Fasting_ | rs139403963 | S8  | DIAPH1                 | rs7763107   | S8        | FARS2     | 9.44E-17    | 3.86E-09    | 4.06E-13 | 1.60E-12    | 6.52E-05    | 7.13E-09 |
| phe.Fasting_ | rs139403963 | S8  | DIAPH1                 | rs77798597  | S7        | KPNA3     | 5.05E-16    | 2.06E-08    | 1.59E-12 | 2.16E-14    | 8.80E-07    | 1.71E-10 |
| phe.Fasting_ | rs139403963 | S8  | DIAPH1                 | rs78697063  | S5        | MSI2      | 7.77E-20    | 3.17E-12    | 2.23E-14 | 1.45E-10    | 0.00591847  | 4.35E-07 |
| phe.Fasting_ | rs139403963 | S8  | DIAPH1                 | rs78736524  | S5        | KPNA3     | 5.05E-16    | 2.06E-08    | 1.59E-12 | 2.34E-14    | 9.53E-07    | 1.79E-10 |
| phe.Fasting_ | rs139403963 | S8  | DIAPH1                 | rs79781495  | S8        | KPNA3     | 5.05E-16    | 2.06E-08    | 1.59E-12 | 2.16E-14    | 8.80E-07    | 1.71E-10 |
| phe.Fasting_ | rs139403963 | S8  | DIAPH1                 | rs80332465  | S5        | KPNA3     | 5.36E-16    | 2.19E-08    | 1.67E-12 | 2.32E-14    | 9.45E-07    | 1.79E-10 |
| phe.Fasting_ | rs139403963 | S8  | DIAPH1                 | rs80334773  | S5        | KPNA3     | 5.36E-16    | 2.19E-08    | 1.67E-12 | 2.32E-14    | 9.45E-07    | 1.79E-10 |
| phe.Fasting_ | rs139621309 | S18 | "LOC100505(rs115787552 | S5          | KPNA3     | 2.97E-15  | 1.21E-07    | 8.14E-12    | 1.18E-13 | 4.80E-06    | 7.06E-10    |          |
| phe.Fasting_ | rs139621309 | S18 | "LOC100505(rs115888477 | S8          | NA        | 2.03E-14  | 8.28E-07    | 5.02E-11    | 2.21E-14 | 8.99E-07    | 1.73E-10    |          |
| phe.Fasting_ | rs139621309 | S18 | "LOC100505(rs116011837 | S9          | BRD2      | 4.89E-11  | 0.00199774  | 6.62E-08    | 4.07E-14 | 1.66E-06    | 2.85E-10    |          |
| phe.Fasting_ | rs139621309 | S18 | "LOC100505(rs116079984 | S8          | KPNA3     | 2.97E-15  | 1.21E-07    | 8.14E-12    | 1.24E-13 | 5.04E-06    | 7.34E-10    |          |
| phe.Fasting_ | rs139621309 | S18 | "LOC100505(rs116120727 | S9          | BRD2      | 4.89E-11  | 0.00199774  | 6.62E-08    | 4.07E-14 | 1.66E-06    | 2.85E-10    |          |
| phe.Fasting_ | rs139621309 | S18 | "LOC100505(rs116548615 | S8          | TMEM45B   | 1.73E-16  | 7.06E-09    | 6.15E-13    | 8.70E-12 | 0.000354153 | 3.26E-08    |          |
| phe.Fasting_ | rs139621309 | S18 | "LOC100505(rs146815317 | S5          | KPNA3     | 2.97E-15  | 1.21E-07    | 8.14E-12    | 1.18E-13 | 4.80E-06    | 7.06E-10    |          |
| phe.Fasting_ | rs139621309 | S18 | "LOC100505(rs150117838 | S8          | KPNA3     | 2.97E-15  | 1.21E-07    | 8.14E-12    | 1.09E-13 | 4.44E-06    | 6.79E-10    |          |
| phe.Fasting_ | rs139621309 | S18 | "LOC100505(rs16894241  | S4          | HIST1H2BK | 1.99E-11  | 0.000812315 | 2.96E-08    | 3.44E-14 | 1.40E-06    | 2.50E-10    |          |
| phe.Fasting_ | rs139621309 | S18 | "LOC100505(rs57503635  | S3          | NA        | 6.34E-16  | 2.59E-08    | 1.95E-12    | 3.17E-14 | 1.29E-06    | 2.34E-10    |          |
| phe.Fasting_ | rs139621309 | S18 | "LOC100505(rs7256517   | S7          | CYTH2     | 1.04E-15  | 4.24E-08    | 3.06E-12    | 4.82E-12 | 0.000196022 | 1.91E-08    |          |

|              |             |     |                       |             |         |           |            |             |          |             |             |          |
|--------------|-------------|-----|-----------------------|-------------|---------|-----------|------------|-------------|----------|-------------|-------------|----------|
| phe.Fasting_ | rs139621309 | S18 | "LOC100505(rs73392640 | S8          | POLR3B  | 2.02E-10  | 0.00826001 | 2.49E-07    | 5.19E-11 | 0.00211214  | 1.67E-07    |          |
| phe.Fasting_ | rs139621309 | S18 | "LOC100505(rs73619637 | S8          | NA      | 1.44E-15  | 5.89E-08   | 4.14E-12    | 2.05E-10 | 0.00833668  | 5.78E-07    |          |
| phe.Fasting_ | rs139621309 | S18 | "LOC100505(rs74914207 | S24         | NA      | 1.37E-10  | 0.00558626 | 1.73E-07    | 9.12E-11 | 0.0037135   | 2.80E-07    |          |
| phe.Fasting_ | rs139621309 | S18 | "LOC100505(rs75758702 | S24         | NA      | 7.02E-17  | 2.87E-09   | 3.16E-13    | 1.57E-10 | 0.00638323  | 4.59E-07    |          |
| phe.Fasting_ | rs139621309 | S18 | "LOC100505(rs7763107  | S8          | FARS2   | 5.78E-16  | 2.36E-08   | 1.79E-12    | 9.23E-12 | 0.000375564 | 3.44E-08    |          |
| phe.Fasting_ | rs139621309 | S18 | "LOC100505(rs77798597 | S7          | KPNA3   | 2.97E-15  | 1.21E-07   | 8.14E-12    | 1.09E-13 | 4.44E-06    | 6.79E-10    |          |
| phe.Fasting_ | rs139621309 | S18 | "LOC100505(rs78516788 | S8          | SLC38A1 | 2.75E-11  | 0.00112269 | 3.94E-08    | 2.44E-10 | 0.00992686  | 6.74E-07    |          |
| phe.Fasting_ | rs139621309 | S18 | "LOC100505(rs78736524 | S5          | KPNA3   | 2.97E-15  | 1.21E-07   | 8.14E-12    | 1.18E-13 | 4.80E-06    | 7.06E-10    |          |
| phe.Fasting_ | rs139621309 | S18 | "LOC100505(rs79781495 | S8          | KPNA3   | 2.97E-15  | 1.21E-07   | 8.14E-12    | 1.09E-13 | 4.44E-06    | 6.79E-10    |          |
| phe.Fasting_ | rs139621309 | S18 | "LOC100505(rs80332465 | S5          | KPNA3   | 3.13E-15  | 1.28E-07   | 8.51E-12    | 1.17E-13 | 4.77E-06    | 7.06E-10    |          |
| phe.Fasting_ | rs139621309 | S18 | "LOC100505(rs80334773 | S5          | KPNA3   | 3.13E-15  | 1.28E-07   | 8.51E-12    | 1.17E-13 | 4.77E-06    | 7.06E-10    |          |
| phe.Fasting_ | rs139797194 | S8  | MYO1B                 | rs113357907 | S24     | ISL1      | 1.90E-17   | 7.77E-10    | 1.37E-13 | 4.66E-16    | 1.90E-08    | 1.16E-11 |
| phe.Fasting_ | rs139797194 | S8  | MYO1B                 | rs141926074 | S8      | ATE1      | 9.84E-18   | 4.02E-10    | 9.58E-14 | 1.24E-11    | 0.000506616 | 4.56E-08 |
| phe.Fasting_ | rs139797194 | S8  | MYO1B                 | rs2153597   | S8      | ZNF438    | 2.91E-12   | 0.000118651 | 5.33E-09 | 5.04E-11    | 0.00205151  | 1.63E-07 |
| phe.Fasting_ | rs139797194 | S8  | MYO1B                 | rs6881310   | S23     | ISL1      | 1.32E-16   | 5.39E-09    | 5.28E-13 | 1.65E-11    | 0.000670252 | 5.90E-08 |
| phe.Fasting_ | rs139797194 | S8  | MYO1B                 | rs73619637  | S8      | NA        | 2.96E-16   | 1.21E-08    | 9.84E-13 | 2.25E-15    | 9.15E-08    | 2.25E-11 |
| phe.Fasting_ | rs139797194 | S8  | MYO1B                 | rs77444916  | S23     | LOC642366 | 4.27E-17   | 1.74E-09    | 2.23E-13 | 4.40E-16    | 1.79E-08    | 1.16E-11 |
| phe.Fasting_ | rs139797194 | S8  | MYO1B                 | rs80258830  | S24     | LOC642366 | 4.27E-17   | 1.74E-09    | 2.23E-13 | 4.40E-16    | 1.79E-08    | 1.16E-11 |
| phe.Fasting_ | rs139828110 | S8  | DIAPH1                | rs112089881 | S8      | ZFAND4    | 3.24E-18   | 1.32E-10    | 5.45E-14 | 1.95E-10    | 0.00795558  | 5.56E-07 |
| phe.Fasting_ | rs139828110 | S8  | DIAPH1                | rs115787552 | S5      | KPNA3     | 5.05E-16   | 2.06E-08    | 1.59E-12 | 2.34E-14    | 9.53E-07    | 1.79E-10 |
| phe.Fasting_ | rs139828110 | S8  | DIAPH1                | rs115888477 | S8      | NA        | 3.68E-15   | 1.50E-07    | 9.90E-12 | 4.11E-15    | 1.67E-07    | 3.84E-11 |
| phe.Fasting_ | rs139828110 | S8  | DIAPH1                | rs116011837 | S9      | BRD2      | 9.60E-12   | 0.000392176 | 1.53E-08 | 9.05E-15    | 3.68E-07    | 7.90E-11 |
| phe.Fasting_ | rs139828110 | S8  | DIAPH1                | rs116079984 | S8      | KPNA3     | 5.05E-16   | 2.06E-08    | 1.59E-12 | 2.56E-14    | 1.04E-06    | 1.94E-10 |
| phe.Fasting_ | rs139828110 | S8  | DIAPH1                | rs116120727 | S9      | BRD2      | 9.60E-12   | 0.000392176 | 1.53E-08 | 9.05E-15    | 3.68E-07    | 7.90E-11 |
| phe.Fasting_ | rs139828110 | S8  | DIAPH1                | rs116548615 | S8      | TMEM45B   | 2.95E-17   | 1.21E-09    | 1.69E-13 | 1.76E-12    | 7.17E-05    | 7.72E-09 |
| phe.Fasting_ | rs139828110 | S8  | DIAPH1                | rs146815317 | S5      | KPNA3     | 5.05E-16   | 2.06E-08    | 1.59E-12 | 2.34E-14    | 9.53E-07    | 1.79E-10 |
| phe.Fasting_ | rs139828110 | S8  | DIAPH1                | rs150117838 | S8      | KPNA3     | 5.05E-16   | 2.06E-08    | 1.59E-12 | 2.16E-14    | 8.80E-07    | 1.71E-10 |
| phe.Fasting_ | rs139828110 | S8  | DIAPH1                | rs16894241  | S4      | HIST1H2BK | 3.73E-12   | 0.000152384 | 6.73E-09 | 6.62E-15    | 2.69E-07    | 5.94E-11 |
| phe.Fasting_ | rs139828110 | S8  | DIAPH1                | rs57503635  | S3      | NA        | 1.28E-16   | 5.23E-09    | 5.19E-13 | 6.61E-15    | 2.69E-07    | 5.94E-11 |
| phe.Fasting_ | rs139828110 | S8  | DIAPH1                | rs7256517   | S7      | CYTH2     | 1.59E-16   | 6.48E-09    | 6.03E-13 | 9.69E-13    | 3.95E-05    | 4.59E-09 |
| phe.Fasting_ | rs139828110 | S8  | DIAPH1                | rs73392640  | S8      | POLR3B    | 4.58E-11   | 0.00187102  | 6.24E-08 | 6.82E-12    | 0.000277641 | 2.62E-08 |
| phe.Fasting_ | rs139828110 | S8  | DIAPH1                | rs74914207  | S24     | NA        | 2.89E-11   | 0.00117833  | 4.13E-08 | 1.56E-11    | 0.000634366 | 5.60E-08 |
| phe.Fasting_ | rs139828110 | S8  | DIAPH1                | rs75758702  | S24     | NA        | 1.04E-17   | 4.25E-10    | 9.89E-14 | 2.85E-11    | 0.00115844  | 9.77E-08 |
| phe.Fasting_ | rs139828110 | S8  | DIAPH1                | rs7763107   | S8      | FARS2     | 9.44E-17   | 3.86E-09    | 4.06E-13 | 1.60E-12    | 6.52E-05    | 7.13E-09 |
| phe.Fasting_ | rs139828110 | S8  | DIAPH1                | rs77798597  | S7      | KPNA3     | 5.05E-16   | 2.06E-08    | 1.59E-12 | 2.16E-14    | 8.80E-07    | 1.71E-10 |
| phe.Fasting_ | rs139828110 | S8  | DIAPH1                | rs78697063  | S5      | MSI2      | 7.77E-20   | 3.17E-12    | 2.23E-14 | 1.45E-10    | 0.00591847  | 4.35E-07 |
| phe.Fasting_ | rs139828110 | S8  | DIAPH1                | rs78736524  | S5      | KPNA3     | 5.05E-16   | 2.06E-08    | 1.59E-12 | 2.34E-14    | 9.53E-07    | 1.79E-10 |
| phe.Fasting_ | rs139828110 | S8  | DIAPH1                | rs79781495  | S8      | KPNA3     | 5.05E-16   | 2.06E-08    | 1.59E-12 | 2.16E-14    | 8.80E-07    | 1.71E-10 |
| phe.Fasting_ | rs139828110 | S8  | DIAPH1                | rs80332465  | S5      | KPNA3     | 5.36E-16   | 2.19E-08    | 1.67E-12 | 2.32E-14    | 9.45E-07    | 1.79E-10 |
| phe.Fasting_ | rs139828110 | S8  | DIAPH1                | rs80334773  | S5      | KPNA3     | 5.36E-16   | 2.19E-08    | 1.67E-12 | 2.32E-14    | 9.45E-07    | 1.79E-10 |

|              |                 |        |                |           |          |             |          |          |             |          |
|--------------|-----------------|--------|----------------|-----------|----------|-------------|----------|----------|-------------|----------|
| phe.Fasting_ | rs140070363 S8  | DIAPH1 | rs115787552 S5 | KPNA3     | 2.97E-15 | 1.21E-07    | 8.14E-12 | 1.18E-13 | 4.80E-06    | 7.06E-10 |
| phe.Fasting_ | rs140070363 S8  | DIAPH1 | rs115888477 S8 | NA        | 2.03E-14 | 8.28E-07    | 5.02E-11 | 2.21E-14 | 8.99E-07    | 1.73E-10 |
| phe.Fasting_ | rs140070363 S8  | DIAPH1 | rs116011837 S9 | BRD2      | 4.89E-11 | 0.00199774  | 6.62E-08 | 4.07E-14 | 1.66E-06    | 2.85E-10 |
| phe.Fasting_ | rs140070363 S8  | DIAPH1 | rs116079984 S8 | KPNA3     | 2.97E-15 | 1.21E-07    | 8.14E-12 | 1.24E-13 | 5.04E-06    | 7.34E-10 |
| phe.Fasting_ | rs140070363 S8  | DIAPH1 | rs116120727 S9 | BRD2      | 4.89E-11 | 0.00199774  | 6.62E-08 | 4.07E-14 | 1.66E-06    | 2.85E-10 |
| phe.Fasting_ | rs140070363 S8  | DIAPH1 | rs116548615 S8 | TMEM45B   | 1.73E-16 | 7.06E-09    | 6.15E-13 | 8.70E-12 | 0.000354153 | 3.26E-08 |
| phe.Fasting_ | rs140070363 S8  | DIAPH1 | rs146815317 S5 | KPNA3     | 2.97E-15 | 1.21E-07    | 8.14E-12 | 1.18E-13 | 4.80E-06    | 7.06E-10 |
| phe.Fasting_ | rs140070363 S8  | DIAPH1 | rs150117838 S8 | KPNA3     | 2.97E-15 | 1.21E-07    | 8.14E-12 | 1.09E-13 | 4.44E-06    | 6.79E-10 |
| phe.Fasting_ | rs140070363 S8  | DIAPH1 | rs16894241 S4  | HIST1H2BK | 1.99E-11 | 0.000812315 | 2.96E-08 | 3.44E-14 | 1.40E-06    | 2.50E-10 |
| phe.Fasting_ | rs140070363 S8  | DIAPH1 | rs57503635 S3  | NA        | 6.34E-16 | 2.59E-08    | 1.95E-12 | 3.17E-14 | 1.29E-06    | 2.34E-10 |
| phe.Fasting_ | rs140070363 S8  | DIAPH1 | rs7256517 S7   | CYTH2     | 1.04E-15 | 4.24E-08    | 3.06E-12 | 4.82E-12 | 0.000196022 | 1.91E-08 |
| phe.Fasting_ | rs140070363 S8  | DIAPH1 | rs73392640 S8  | POLR3B    | 2.02E-10 | 0.00826001  | 2.49E-07 | 5.19E-11 | 0.00211214  | 1.67E-07 |
| phe.Fasting_ | rs140070363 S8  | DIAPH1 | rs73619637 S8  | NA        | 1.44E-15 | 5.89E-08    | 4.14E-12 | 2.05E-10 | 0.00833668  | 5.78E-07 |
| phe.Fasting_ | rs140070363 S8  | DIAPH1 | rs74914207 S24 | NA        | 1.37E-10 | 0.00558626  | 1.73E-07 | 9.12E-11 | 0.0037135   | 2.80E-07 |
| phe.Fasting_ | rs140070363 S8  | DIAPH1 | rs75758702 S24 | NA        | 7.02E-17 | 2.87E-09    | 3.16E-13 | 1.57E-10 | 0.00638323  | 4.59E-07 |
| phe.Fasting_ | rs140070363 S8  | DIAPH1 | rs7763107 S8   | FARS2     | 5.78E-16 | 2.36E-08    | 1.79E-12 | 9.23E-12 | 0.000375564 | 3.44E-08 |
| phe.Fasting_ | rs140070363 S8  | DIAPH1 | rs77798597 S7  | KPNA3     | 2.97E-15 | 1.21E-07    | 8.14E-12 | 1.09E-13 | 4.44E-06    | 6.79E-10 |
| phe.Fasting_ | rs140070363 S8  | DIAPH1 | rs78516788 S8  | SLC38A1   | 2.75E-11 | 0.00112269  | 3.94E-08 | 2.44E-10 | 0.00992686  | 6.74E-07 |
| phe.Fasting_ | rs140070363 S8  | DIAPH1 | rs78736524 S5  | KPNA3     | 2.97E-15 | 1.21E-07    | 8.14E-12 | 1.18E-13 | 4.80E-06    | 7.06E-10 |
| phe.Fasting_ | rs140070363 S8  | DIAPH1 | rs79781495 S8  | KPNA3     | 2.97E-15 | 1.21E-07    | 8.14E-12 | 1.09E-13 | 4.44E-06    | 6.79E-10 |
| phe.Fasting_ | rs140070363 S8  | DIAPH1 | rs80332465 S5  | KPNA3     | 3.13E-15 | 1.28E-07    | 8.51E-12 | 1.17E-13 | 4.77E-06    | 7.06E-10 |
| phe.Fasting_ | rs140070363 S8  | DIAPH1 | rs80334773 S5  | KPNA3     | 3.13E-15 | 1.28E-07    | 8.51E-12 | 1.17E-13 | 4.77E-06    | 7.06E-10 |
| phe.Fasting_ | rs140644750 S13 | DIAPH1 | rs115787552 S5 | KPNA3     | 2.97E-15 | 1.21E-07    | 8.14E-12 | 1.18E-13 | 4.80E-06    | 7.06E-10 |
| phe.Fasting_ | rs140644750 S13 | DIAPH1 | rs115888477 S8 | NA        | 2.03E-14 | 8.28E-07    | 5.02E-11 | 2.21E-14 | 8.99E-07    | 1.73E-10 |
| phe.Fasting_ | rs140644750 S13 | DIAPH1 | rs116011837 S9 | BRD2      | 4.89E-11 | 0.00199774  | 6.62E-08 | 4.07E-14 | 1.66E-06    | 2.85E-10 |
| phe.Fasting_ | rs140644750 S13 | DIAPH1 | rs116079984 S8 | KPNA3     | 2.97E-15 | 1.21E-07    | 8.14E-12 | 1.24E-13 | 5.04E-06    | 7.34E-10 |
| phe.Fasting_ | rs140644750 S13 | DIAPH1 | rs116120727 S9 | BRD2      | 4.89E-11 | 0.00199774  | 6.62E-08 | 4.07E-14 | 1.66E-06    | 2.85E-10 |
| phe.Fasting_ | rs140644750 S13 | DIAPH1 | rs116548615 S8 | TMEM45B   | 1.73E-16 | 7.06E-09    | 6.15E-13 | 8.70E-12 | 0.000354153 | 3.26E-08 |
| phe.Fasting_ | rs140644750 S13 | DIAPH1 | rs146815317 S5 | KPNA3     | 2.97E-15 | 1.21E-07    | 8.14E-12 | 1.18E-13 | 4.80E-06    | 7.06E-10 |
| phe.Fasting_ | rs140644750 S13 | DIAPH1 | rs150117838 S8 | KPNA3     | 2.97E-15 | 1.21E-07    | 8.14E-12 | 1.09E-13 | 4.44E-06    | 6.79E-10 |
| phe.Fasting_ | rs140644750 S13 | DIAPH1 | rs16894241 S4  | HIST1H2BK | 1.99E-11 | 0.000812315 | 2.96E-08 | 3.44E-14 | 1.40E-06    | 2.50E-10 |
| phe.Fasting_ | rs140644750 S13 | DIAPH1 | rs57503635 S3  | NA        | 6.34E-16 | 2.59E-08    | 1.95E-12 | 3.17E-14 | 1.29E-06    | 2.34E-10 |
| phe.Fasting_ | rs140644750 S13 | DIAPH1 | rs7256517 S7   | CYTH2     | 1.04E-15 | 4.24E-08    | 3.06E-12 | 4.82E-12 | 0.000196022 | 1.91E-08 |
| phe.Fasting_ | rs140644750 S13 | DIAPH1 | rs73392640 S8  | POLR3B    | 2.02E-10 | 0.00826001  | 2.49E-07 | 5.19E-11 | 0.00211214  | 1.67E-07 |
| phe.Fasting_ | rs140644750 S13 | DIAPH1 | rs73619637 S8  | NA        | 1.44E-15 | 5.89E-08    | 4.14E-12 | 2.05E-10 | 0.00833668  | 5.78E-07 |
| phe.Fasting_ | rs140644750 S13 | DIAPH1 | rs74914207 S24 | NA        | 1.37E-10 | 0.00558626  | 1.73E-07 | 9.12E-11 | 0.0037135   | 2.80E-07 |
| phe.Fasting_ | rs140644750 S13 | DIAPH1 | rs75758702 S24 | NA        | 7.02E-17 | 2.87E-09    | 3.16E-13 | 1.57E-10 | 0.00638323  | 4.59E-07 |
| phe.Fasting_ | rs140644750 S13 | DIAPH1 | rs7763107 S8   | FARS2     | 5.78E-16 | 2.36E-08    | 1.79E-12 | 9.23E-12 | 0.000375564 | 3.44E-08 |
| phe.Fasting_ | rs140644750 S13 | DIAPH1 | rs77798597 S7  | KPNA3     | 2.97E-15 | 1.21E-07    | 8.14E-12 | 1.09E-13 | 4.44E-06    | 6.79E-10 |
| phe.Fasting_ | rs140644750 S13 | DIAPH1 | rs78516788 S8  | SLC38A1   | 2.75E-11 | 0.00112269  | 3.94E-08 | 2.44E-10 | 0.00992686  | 6.74E-07 |

|                            |        |             |     |           |          |             |          |          |             |          |
|----------------------------|--------|-------------|-----|-----------|----------|-------------|----------|----------|-------------|----------|
| phe.Fasting_rs140644750S13 | DIAPH1 | rs78736524  | S5  | KPNA3     | 2.97E-15 | 1.21E-07    | 8.14E-12 | 1.18E-13 | 4.80E-06    | 7.06E-10 |
| phe.Fasting_rs140644750S13 | DIAPH1 | rs79781495  | S8  | KPNA3     | 2.97E-15 | 1.21E-07    | 8.14E-12 | 1.09E-13 | 4.44E-06    | 6.79E-10 |
| phe.Fasting_rs140644750S13 | DIAPH1 | rs80332465  | S5  | KPNA3     | 3.13E-15 | 1.28E-07    | 8.51E-12 | 1.17E-13 | 4.77E-06    | 7.06E-10 |
| phe.Fasting_rs140644750S13 | DIAPH1 | rs80334773  | S5  | KPNA3     | 3.13E-15 | 1.28E-07    | 8.51E-12 | 1.17E-13 | 4.77E-06    | 7.06E-10 |
| phe.Fasting_rs141022544S8  | DIAPH1 | rs115787552 | S5  | KPNA3     | 2.97E-15 | 1.21E-07    | 8.14E-12 | 1.18E-13 | 4.80E-06    | 7.06E-10 |
| phe.Fasting_rs141022544S8  | DIAPH1 | rs115888477 | S8  | NA        | 2.03E-14 | 8.28E-07    | 5.02E-11 | 2.21E-14 | 8.99E-07    | 1.73E-10 |
| phe.Fasting_rs141022544S8  | DIAPH1 | rs116011837 | S9  | BRD2      | 4.89E-11 | 0.00199774  | 6.62E-08 | 4.07E-14 | 1.66E-06    | 2.85E-10 |
| phe.Fasting_rs141022544S8  | DIAPH1 | rs116079984 | S8  | KPNA3     | 2.97E-15 | 1.21E-07    | 8.14E-12 | 1.24E-13 | 5.04E-06    | 7.34E-10 |
| phe.Fasting_rs141022544S8  | DIAPH1 | rs116120727 | S9  | BRD2      | 4.89E-11 | 0.00199774  | 6.62E-08 | 4.07E-14 | 1.66E-06    | 2.85E-10 |
| phe.Fasting_rs141022544S8  | DIAPH1 | rs116548615 | S8  | TMEM45B   | 1.73E-16 | 7.06E-09    | 6.15E-13 | 8.70E-12 | 0.000354153 | 3.26E-08 |
| phe.Fasting_rs141022544S8  | DIAPH1 | rs146815317 | S5  | KPNA3     | 2.97E-15 | 1.21E-07    | 8.14E-12 | 1.18E-13 | 4.80E-06    | 7.06E-10 |
| phe.Fasting_rs141022544S8  | DIAPH1 | rs150117838 | S8  | KPNA3     | 2.97E-15 | 1.21E-07    | 8.14E-12 | 1.09E-13 | 4.44E-06    | 6.79E-10 |
| phe.Fasting_rs141022544S8  | DIAPH1 | rs16894241  | S4  | HIST1H2BK | 1.99E-11 | 0.000812315 | 2.96E-08 | 3.44E-14 | 1.40E-06    | 2.50E-10 |
| phe.Fasting_rs141022544S8  | DIAPH1 | rs57503635  | S3  | NA        | 6.34E-16 | 2.59E-08    | 1.95E-12 | 3.17E-14 | 1.29E-06    | 2.34E-10 |
| phe.Fasting_rs141022544S8  | DIAPH1 | rs7256517   | S7  | CYTH2     | 1.04E-15 | 4.24E-08    | 3.06E-12 | 4.82E-12 | 0.000196022 | 1.91E-08 |
| phe.Fasting_rs141022544S8  | DIAPH1 | rs73392640  | S8  | POLR3B    | 2.02E-10 | 0.00826001  | 2.49E-07 | 5.19E-11 | 0.00211214  | 1.67E-07 |
| phe.Fasting_rs141022544S8  | DIAPH1 | rs73619637  | S8  | NA        | 1.44E-15 | 5.89E-08    | 4.14E-12 | 2.05E-10 | 0.00833668  | 5.78E-07 |
| phe.Fasting_rs141022544S8  | DIAPH1 | rs74914207  | S24 | NA        | 1.37E-10 | 0.00558626  | 1.73E-07 | 9.12E-11 | 0.0037135   | 2.80E-07 |
| phe.Fasting_rs141022544S8  | DIAPH1 | rs75758702  | S24 | NA        | 7.02E-17 | 2.87E-09    | 3.16E-13 | 1.57E-10 | 0.00638323  | 4.59E-07 |
| phe.Fasting_rs141022544S8  | DIAPH1 | rs7763107   | S8  | FARS2     | 5.78E-16 | 2.36E-08    | 1.79E-12 | 9.23E-12 | 0.000375564 | 3.44E-08 |
| phe.Fasting_rs141022544S8  | DIAPH1 | rs77798597  | S7  | KPNA3     | 2.97E-15 | 1.21E-07    | 8.14E-12 | 1.09E-13 | 4.44E-06    | 6.79E-10 |
| phe.Fasting_rs141022544S8  | DIAPH1 | rs78516788  | S8  | SLC38A1   | 2.75E-11 | 0.00112269  | 3.94E-08 | 2.44E-10 | 0.00992686  | 6.74E-07 |
| phe.Fasting_rs141022544S8  | DIAPH1 | rs78736524  | S5  | KPNA3     | 2.97E-15 | 1.21E-07    | 8.14E-12 | 1.18E-13 | 4.80E-06    | 7.06E-10 |
| phe.Fasting_rs141022544S8  | DIAPH1 | rs79781495  | S8  | KPNA3     | 2.97E-15 | 1.21E-07    | 8.14E-12 | 1.09E-13 | 4.44E-06    | 6.79E-10 |
| phe.Fasting_rs141022544S8  | DIAPH1 | rs80332465  | S5  | KPNA3     | 3.13E-15 | 1.28E-07    | 8.51E-12 | 1.17E-13 | 4.77E-06    | 7.06E-10 |
| phe.Fasting_rs141022544S8  | DIAPH1 | rs80334773  | S5  | KPNA3     | 3.13E-15 | 1.28E-07    | 8.51E-12 | 1.17E-13 | 4.77E-06    | 7.06E-10 |
| phe.Fasting_rs141525984S5  | DIAPH1 | rs115787552 | S5  | KPNA3     | 2.97E-15 | 1.21E-07    | 8.14E-12 | 1.18E-13 | 4.80E-06    | 7.06E-10 |
| phe.Fasting_rs141525984S5  | DIAPH1 | rs115888477 | S8  | NA        | 2.03E-14 | 8.28E-07    | 5.02E-11 | 2.21E-14 | 8.99E-07    | 1.73E-10 |
| phe.Fasting_rs141525984S5  | DIAPH1 | rs116011837 | S9  | BRD2      | 4.89E-11 | 0.00199774  | 6.62E-08 | 4.07E-14 | 1.66E-06    | 2.85E-10 |
| phe.Fasting_rs141525984S5  | DIAPH1 | rs116079984 | S8  | KPNA3     | 2.97E-15 | 1.21E-07    | 8.14E-12 | 1.24E-13 | 5.04E-06    | 7.34E-10 |
| phe.Fasting_rs141525984S5  | DIAPH1 | rs116120727 | S9  | BRD2      | 4.89E-11 | 0.00199774  | 6.62E-08 | 4.07E-14 | 1.66E-06    | 2.85E-10 |
| phe.Fasting_rs141525984S5  | DIAPH1 | rs116548615 | S8  | TMEM45B   | 1.73E-16 | 7.06E-09    | 6.15E-13 | 8.70E-12 | 0.000354153 | 3.26E-08 |
| phe.Fasting_rs141525984S5  | DIAPH1 | rs146815317 | S5  | KPNA3     | 2.97E-15 | 1.21E-07    | 8.14E-12 | 1.18E-13 | 4.80E-06    | 7.06E-10 |
| phe.Fasting_rs141525984S5  | DIAPH1 | rs150117838 | S8  | KPNA3     | 2.97E-15 | 1.21E-07    | 8.14E-12 | 1.09E-13 | 4.44E-06    | 6.79E-10 |
| phe.Fasting_rs141525984S5  | DIAPH1 | rs16894241  | S4  | HIST1H2BK | 1.99E-11 | 0.000812315 | 2.96E-08 | 3.44E-14 | 1.40E-06    | 2.50E-10 |
| phe.Fasting_rs141525984S5  | DIAPH1 | rs57503635  | S3  | NA        | 6.34E-16 | 2.59E-08    | 1.95E-12 | 3.17E-14 | 1.29E-06    | 2.34E-10 |
| phe.Fasting_rs141525984S5  | DIAPH1 | rs7256517   | S7  | CYTH2     | 1.04E-15 | 4.24E-08    | 3.06E-12 | 4.82E-12 | 0.000196022 | 1.91E-08 |
| phe.Fasting_rs141525984S5  | DIAPH1 | rs73392640  | S8  | POLR3B    | 2.02E-10 | 0.00826001  | 2.49E-07 | 5.19E-11 | 0.00211214  | 1.67E-07 |
| phe.Fasting_rs141525984S5  | DIAPH1 | rs73619637  | S8  | NA        | 1.44E-15 | 5.89E-08    | 4.14E-12 | 2.05E-10 | 0.00833668  | 5.78E-07 |
| phe.Fasting_rs141525984S5  | DIAPH1 | rs74914207  | S24 | NA        | 1.37E-10 | 0.00558626  | 1.73E-07 | 9.12E-11 | 0.0037135   | 2.80E-07 |

|              |             |    |            |             |     |           |          |             |          |          |             |          |
|--------------|-------------|----|------------|-------------|-----|-----------|----------|-------------|----------|----------|-------------|----------|
| phe.Fasting_ | rs141525984 | S5 | DIAPH1     | rs75758702  | S24 | NA        | 7.02E-17 | 2.87E-09    | 3.16E-13 | 1.57E-10 | 0.00638323  | 4.59E-07 |
| phe.Fasting_ | rs141525984 | S5 | DIAPH1     | rs7763107   | S8  | FARS2     | 5.78E-16 | 2.36E-08    | 1.79E-12 | 9.23E-12 | 0.000375564 | 3.44E-08 |
| phe.Fasting_ | rs141525984 | S5 | DIAPH1     | rs77798597  | S7  | KPNA3     | 2.97E-15 | 1.21E-07    | 8.14E-12 | 1.09E-13 | 4.44E-06    | 6.79E-10 |
| phe.Fasting_ | rs141525984 | S5 | DIAPH1     | rs78516788  | S8  | SLC38A1   | 2.75E-11 | 0.00112269  | 3.94E-08 | 2.44E-10 | 0.00992686  | 6.74E-07 |
| phe.Fasting_ | rs141525984 | S5 | DIAPH1     | rs78736524  | S5  | KPNA3     | 2.97E-15 | 1.21E-07    | 8.14E-12 | 1.18E-13 | 4.80E-06    | 7.06E-10 |
| phe.Fasting_ | rs141525984 | S5 | DIAPH1     | rs79781495  | S8  | KPNA3     | 2.97E-15 | 1.21E-07    | 8.14E-12 | 1.09E-13 | 4.44E-06    | 6.79E-10 |
| phe.Fasting_ | rs141525984 | S5 | DIAPH1     | rs80332465  | S5  | KPNA3     | 3.13E-15 | 1.28E-07    | 8.51E-12 | 1.17E-13 | 4.77E-06    | 7.06E-10 |
| phe.Fasting_ | rs141525984 | S5 | DIAPH1     | rs80334773  | S5  | KPNA3     | 3.13E-15 | 1.28E-07    | 8.51E-12 | 1.17E-13 | 4.77E-06    | 7.06E-10 |
| phe.Fasting_ | rs141692339 | S3 | "PCDHGA6,P | rs115787552 | S5  | KPNA3     | 4.75E-16 | 1.94E-08    | 1.51E-12 | 6.03E-14 | 2.46E-06    | 4.09E-10 |
| phe.Fasting_ | rs141692339 | S3 | "PCDHGA6,P | rs115888477 | S8  | NA        | 3.41E-15 | 1.39E-07    | 9.24E-12 | 1.07E-14 | 4.37E-07    | 9.31E-11 |
| phe.Fasting_ | rs141692339 | S3 | "PCDHGA6,P | rs116079984 | S8  | KPNA3     | 4.75E-16 | 1.94E-08    | 1.51E-12 | 6.40E-14 | 2.60E-06    | 4.33E-10 |
| phe.Fasting_ | rs141692339 | S3 | "PCDHGA6,P | rs116548615 | S8  | TMEM45B   | 2.56E-17 | 1.05E-09    | 1.58E-13 | 1.16E-11 | 0.000472288 | 4.26E-08 |
| phe.Fasting_ | rs141692339 | S3 | "PCDHGA6,P | rs146815317 | S5  | KPNA3     | 4.75E-16 | 1.94E-08    | 1.51E-12 | 6.03E-14 | 2.46E-06    | 4.09E-10 |
| phe.Fasting_ | rs141692339 | S3 | "PCDHGA6,P | rs150117838 | S8  | KPNA3     | 4.75E-16 | 1.94E-08    | 1.51E-12 | 5.58E-14 | 2.27E-06    | 3.84E-10 |
| phe.Fasting_ | rs141692339 | S3 | "PCDHGA6,P | rs16894241  | S4  | HIST1H2BK | 2.52E-12 | 0.000102951 | 4.68E-09 | 1.70E-14 | 6.91E-07    | 1.40E-10 |
| phe.Fasting_ | rs141692339 | S3 | "PCDHGA6,P | rs77798597  | S7  | KPNA3     | 4.75E-16 | 1.94E-08    | 1.51E-12 | 5.58E-14 | 2.27E-06    | 3.84E-10 |
| phe.Fasting_ | rs141692339 | S3 | "PCDHGA6,P | rs78736524  | S5  | KPNA3     | 4.75E-16 | 1.94E-08    | 1.51E-12 | 6.03E-14 | 2.46E-06    | 4.09E-10 |
| phe.Fasting_ | rs141692339 | S3 | "PCDHGA6,P | rs79781495  | S8  | KPNA3     | 4.75E-16 | 1.94E-08    | 1.51E-12 | 5.58E-14 | 2.27E-06    | 3.84E-10 |
| phe.Fasting_ | rs141692339 | S3 | "PCDHGA6,P | rs80332465  | S5  | KPNA3     | 5.06E-16 | 2.07E-08    | 1.59E-12 | 6.03E-14 | 2.45E-06    | 4.09E-10 |
| phe.Fasting_ | rs141692339 | S3 | "PCDHGA6,P | rs80334773  | S5  | KPNA3     | 5.06E-16 | 2.07E-08    | 1.59E-12 | 6.03E-14 | 2.45E-06    | 4.09E-10 |
| phe.Fasting_ | rs141926074 | S8 | ATE1       | rs115787552 | S5  | KPNA3     | 1.30E-16 | 5.31E-09    | 5.25E-13 | 2.22E-15 | 9.04E-08    | 2.24E-11 |
| phe.Fasting_ | rs141926074 | S8 | ATE1       | rs115888477 | S8  | NA        | 9.78E-16 | 3.99E-08    | 2.91E-12 | 3.77E-15 | 1.53E-07    | 3.57E-11 |
| phe.Fasting_ | rs141926074 | S8 | ATE1       | rs116079984 | S8  | KPNA3     | 1.30E-16 | 5.31E-09    | 5.25E-13 | 3.91E-15 | 1.59E-07    | 3.68E-11 |
| phe.Fasting_ | rs141926074 | S8 | ATE1       | rs146815317 | S5  | KPNA3     | 1.30E-16 | 5.31E-09    | 5.25E-13 | 2.22E-15 | 9.04E-08    | 2.24E-11 |
| phe.Fasting_ | rs141926074 | S8 | ATE1       | rs150117838 | S8  | KPNA3     | 1.30E-16 | 5.31E-09    | 5.25E-13 | 3.55E-15 | 1.45E-07    | 3.39E-11 |
| phe.Fasting_ | rs141926074 | S8 | ATE1       | rs57503635  | S3  | NA        | 3.36E-17 | 1.37E-09    | 1.87E-13 | 4.46E-15 | 1.81E-07    | 4.13E-11 |
| phe.Fasting_ | rs141926074 | S8 | ATE1       | rs74914207  | S24 | NA        | 1.21E-17 | 4.92E-10    | 1.05E-13 | 2.93E-15 | 1.19E-07    | 2.83E-11 |
| phe.Fasting_ | rs141926074 | S8 | ATE1       | rs77798597  | S7  | KPNA3     | 1.30E-16 | 5.31E-09    | 5.25E-13 | 3.55E-15 | 1.45E-07    | 3.39E-11 |
| phe.Fasting_ | rs141926074 | S8 | ATE1       | rs78516788  | S8  | SLC38A1   | 4.52E-18 | 1.85E-10    | 6.42E-14 | 1.50E-12 | 6.10E-05    | 6.73E-09 |
| phe.Fasting_ | rs141926074 | S8 | ATE1       | rs78736524  | S5  | KPNA3     | 1.30E-16 | 5.31E-09    | 5.25E-13 | 2.22E-15 | 9.04E-08    | 2.24E-11 |
| phe.Fasting_ | rs141926074 | S8 | ATE1       | rs79781495  | S8  | KPNA3     | 1.30E-16 | 5.31E-09    | 5.25E-13 | 3.55E-15 | 1.45E-07    | 3.39E-11 |
| phe.Fasting_ | rs141926074 | S8 | ATE1       | rs80332465  | S5  | KPNA3     | 1.39E-16 | 5.69E-09    | 5.53E-13 | 3.20E-15 | 1.30E-07    | 3.07E-11 |
| phe.Fasting_ | rs141926074 | S8 | ATE1       | rs80334773  | S5  | KPNA3     | 1.39E-16 | 5.69E-09    | 5.53E-13 | 3.20E-15 | 1.30E-07    | 3.07E-11 |
| phe.Fasting_ | rs142480565 | S8 | DIAPH1     | rs115787552 | S5  | KPNA3     | 2.97E-15 | 1.21E-07    | 8.14E-12 | 1.18E-13 | 4.80E-06    | 7.06E-10 |
| phe.Fasting_ | rs142480565 | S8 | DIAPH1     | rs115888477 | S8  | NA        | 2.03E-14 | 8.28E-07    | 5.02E-11 | 2.21E-14 | 8.99E-07    | 1.73E-10 |
| phe.Fasting_ | rs142480565 | S8 | DIAPH1     | rs116011837 | S9  | BRD2      | 4.89E-11 | 0.00199774  | 6.62E-08 | 4.07E-14 | 1.66E-06    | 2.85E-10 |
| phe.Fasting_ | rs142480565 | S8 | DIAPH1     | rs116079984 | S8  | KPNA3     | 2.97E-15 | 1.21E-07    | 8.14E-12 | 1.24E-13 | 5.04E-06    | 7.34E-10 |
| phe.Fasting_ | rs142480565 | S8 | DIAPH1     | rs116120727 | S9  | BRD2      | 4.89E-11 | 0.00199774  | 6.62E-08 | 4.07E-14 | 1.66E-06    | 2.85E-10 |
| phe.Fasting_ | rs142480565 | S8 | DIAPH1     | rs116548615 | S8  | TMEM45B   | 1.73E-16 | 7.06E-09    | 6.15E-13 | 8.70E-12 | 0.000354153 | 3.26E-08 |
| phe.Fasting_ | rs142480565 | S8 | DIAPH1     | rs146815317 | S5  | KPNA3     | 2.97E-15 | 1.21E-07    | 8.14E-12 | 1.18E-13 | 4.80E-06    | 7.06E-10 |



|              |             |    |             |             |     |           |          |             |          |          |             |          |
|--------------|-------------|----|-------------|-------------|-----|-----------|----------|-------------|----------|----------|-------------|----------|
| phe.Fasting_ | rs142480565 | S8 | DIAPH1      | rs150117838 | S8  | KPNA3     | 2.97E-15 | 1.21E-07    | 8.14E-12 | 1.09E-13 | 4.44E-06    | 6.79E-10 |
| phe.Fasting_ | rs142480565 | S8 | DIAPH1      | rs16894241  | S4  | HIST1H2BK | 1.99E-11 | 0.000812315 | 2.96E-08 | 3.44E-14 | 1.40E-06    | 2.50E-10 |
| phe.Fasting_ | rs142480565 | S8 | DIAPH1      | rs57503635  | S3  | NA        | 6.34E-16 | 2.59E-08    | 1.95E-12 | 3.17E-14 | 1.29E-06    | 2.34E-10 |
| phe.Fasting_ | rs142480565 | S8 | DIAPH1      | rs7256517   | S7  | CYTH2     | 1.04E-15 | 4.24E-08    | 3.06E-12 | 4.82E-12 | 0.000196022 | 1.91E-08 |
| phe.Fasting_ | rs142480565 | S8 | DIAPH1      | rs73392640  | S8  | POLR3B    | 2.02E-10 | 0.00826001  | 2.49E-07 | 5.19E-11 | 0.00211214  | 1.67E-07 |
| phe.Fasting_ | rs142480565 | S8 | DIAPH1      | rs73619637  | S8  | NA        | 1.44E-15 | 5.89E-08    | 4.14E-12 | 2.05E-10 | 0.00833668  | 5.78E-07 |
| phe.Fasting_ | rs142480565 | S8 | DIAPH1      | rs74914207  | S24 | NA        | 1.37E-10 | 0.00558626  | 1.73E-07 | 9.12E-11 | 0.0037135   | 2.80E-07 |
| phe.Fasting_ | rs142480565 | S8 | DIAPH1      | rs75758702  | S24 | NA        | 7.02E-17 | 2.87E-09    | 3.16E-13 | 1.57E-10 | 0.00638323  | 4.59E-07 |
| phe.Fasting_ | rs142480565 | S8 | DIAPH1      | rs7763107   | S8  | FARS2     | 5.78E-16 | 2.36E-08    | 1.79E-12 | 9.23E-12 | 0.000375564 | 3.44E-08 |
| phe.Fasting_ | rs142480565 | S8 | DIAPH1      | rs77798597  | S7  | KPNA3     | 2.97E-15 | 1.21E-07    | 8.14E-12 | 1.09E-13 | 4.44E-06    | 6.79E-10 |
| phe.Fasting_ | rs142480565 | S8 | DIAPH1      | rs78516788  | S8  | SLC38A1   | 2.75E-11 | 0.00112269  | 3.94E-08 | 2.44E-10 | 0.00992686  | 6.74E-07 |
| phe.Fasting_ | rs142480565 | S8 | DIAPH1      | rs78736524  | S5  | KPNA3     | 2.97E-15 | 1.21E-07    | 8.14E-12 | 1.18E-13 | 4.80E-06    | 7.06E-10 |
| phe.Fasting_ | rs142480565 | S8 | DIAPH1      | rs79781495  | S8  | KPNA3     | 2.97E-15 | 1.21E-07    | 8.14E-12 | 1.09E-13 | 4.44E-06    | 6.79E-10 |
| phe.Fasting_ | rs142480565 | S8 | DIAPH1      | rs80332465  | S5  | KPNA3     | 3.13E-15 | 1.28E-07    | 8.51E-12 | 1.17E-13 | 4.77E-06    | 7.06E-10 |
| phe.Fasting_ | rs142480565 | S8 | DIAPH1      | rs80334773  | S5  | KPNA3     | 3.13E-15 | 1.28E-07    | 8.51E-12 | 1.17E-13 | 4.77E-06    | 7.06E-10 |
| phe.Fasting_ | rs142718558 | S7 | "DIAPH1,LOC | rs115787552 | S5  | KPNA3     | 2.97E-15 | 1.21E-07    | 8.14E-12 | 1.18E-13 | 4.80E-06    | 7.06E-10 |
| phe.Fasting_ | rs142718558 | S7 | "DIAPH1,LOC | rs115888477 | S8  | NA        | 2.03E-14 | 8.28E-07    | 5.02E-11 | 2.21E-14 | 8.99E-07    | 1.73E-10 |
| phe.Fasting_ | rs142718558 | S7 | "DIAPH1,LOC | rs116011837 | S9  | BRD2      | 4.89E-11 | 0.00199774  | 6.62E-08 | 4.07E-14 | 1.66E-06    | 2.85E-10 |
| phe.Fasting_ | rs142718558 | S7 | "DIAPH1,LOC | rs116079984 | S8  | KPNA3     | 2.97E-15 | 1.21E-07    | 8.14E-12 | 1.24E-13 | 5.04E-06    | 7.34E-10 |
| phe.Fasting_ | rs142718558 | S7 | "DIAPH1,LOC | rs116120727 | S9  | BRD2      | 4.89E-11 | 0.00199774  | 6.62E-08 | 4.07E-14 | 1.66E-06    | 2.85E-10 |
| phe.Fasting_ | rs142718558 | S7 | "DIAPH1,LOC | rs116548615 | S8  | TMEM45B   | 1.73E-16 | 7.06E-09    | 6.15E-13 | 8.70E-12 | 0.000354153 | 3.26E-08 |
| phe.Fasting_ | rs142718558 | S7 | "DIAPH1,LOC | rs146815317 | S5  | KPNA3     | 2.97E-15 | 1.21E-07    | 8.14E-12 | 1.18E-13 | 4.80E-06    | 7.06E-10 |
| phe.Fasting_ | rs142718558 | S7 | "DIAPH1,LOC | rs150117838 | S8  | KPNA3     | 2.97E-15 | 1.21E-07    | 8.14E-12 | 1.09E-13 | 4.44E-06    | 6.79E-10 |
| phe.Fasting_ | rs142718558 | S7 | "DIAPH1,LOC | rs16894241  | S4  | HIST1H2BK | 1.99E-11 | 0.000812315 | 2.96E-08 | 3.44E-14 | 1.40E-06    | 2.50E-10 |
| phe.Fasting_ | rs142718558 | S7 | "DIAPH1,LOC | rs57503635  | S3  | NA        | 6.34E-16 | 2.59E-08    | 1.95E-12 | 3.17E-14 | 1.29E-06    | 2.34E-10 |
| phe.Fasting_ | rs142718558 | S7 | "DIAPH1,LOC | rs7256517   | S7  | CYTH2     | 1.04E-15 | 4.24E-08    | 3.06E-12 | 4.82E-12 | 0.000196022 | 1.91E-08 |
| phe.Fasting_ | rs142718558 | S7 | "DIAPH1,LOC | rs73392640  | S8  | POLR3B    | 2.02E-10 | 0.00826001  | 2.49E-07 | 5.19E-11 | 0.00211214  | 1.67E-07 |
| phe.Fasting_ | rs142718558 | S7 | "DIAPH1,LOC | rs73619637  | S8  | NA        | 1.44E-15 | 5.89E-08    | 4.14E-12 | 2.05E-10 | 0.00833668  | 5.78E-07 |
| phe.Fasting_ | rs142718558 | S7 | "DIAPH1,LOC | rs74914207  | S24 | NA        | 1.37E-10 | 0.00558626  | 1.73E-07 | 9.12E-11 | 0.0037135   | 2.80E-07 |
| phe.Fasting_ | rs142718558 | S7 | "DIAPH1,LOC | rs75758702  | S24 | NA        | 7.02E-17 | 2.87E-09    | 3.16E-13 | 1.57E-10 | 0.00638323  | 4.59E-07 |
| phe.Fasting_ | rs142718558 | S7 | "DIAPH1,LOC | rs7763107   | S8  | FARS2     | 5.78E-16 | 2.36E-08    | 1.79E-12 | 9.23E-12 | 0.000375564 | 3.44E-08 |
| phe.Fasting_ | rs142718558 | S7 | "DIAPH1,LOC | rs77798597  | S7  | KPNA3     | 2.97E-15 | 1.21E-07    | 8.14E-12 | 1.09E-13 | 4.44E-06    | 6.79E-10 |
| phe.Fasting_ | rs142718558 | S7 | "DIAPH1,LOC | rs78516788  | S8  | SLC38A1   | 2.75E-11 | 0.00112269  | 3.94E-08 | 2.44E-10 | 0.00992686  | 6.74E-07 |
| phe.Fasting_ | rs142718558 | S7 | "DIAPH1,LOC | rs78736524  | S5  | KPNA3     | 2.97E-15 | 1.21E-07    | 8.14E-12 | 1.18E-13 | 4.80E-06    | 7.06E-10 |
| phe.Fasting_ | rs142718558 | S7 | "DIAPH1,LOC | rs79781495  | S8  | KPNA3     | 2.97E-15 | 1.21E-07    | 8.14E-12 | 1.09E-13 | 4.44E-06    | 6.79E-10 |
| phe.Fasting_ | rs142718558 | S7 | "DIAPH1,LOC | rs80332465  | S5  | KPNA3     | 3.13E-15 | 1.28E-07    | 8.51E-12 | 1.17E-13 | 4.77E-06    | 7.06E-10 |
| phe.Fasting_ | rs142718558 | S7 | "DIAPH1,LOC | rs80334773  | S5  | KPNA3     | 3.13E-15 | 1.28E-07    | 8.51E-12 | 1.17E-13 | 4.77E-06    | 7.06E-10 |
| phe.Fasting_ | rs142789100 | S8 | DIAPH1      | rs112089881 | S8  | ZFAND4    | 3.24E-18 | 1.32E-10    | 5.45E-14 | 1.95E-10 | 0.00795558  | 5.56E-07 |
| phe.Fasting_ | rs142789100 | S8 | DIAPH1      | rs115787552 | S5  | KPNA3     | 5.05E-16 | 2.06E-08    | 1.59E-12 | 2.34E-14 | 9.53E-07    | 1.79E-10 |
| phe.Fasting_ | rs142789100 | S8 | DIAPH1      | rs115888477 | S8  | NA        | 3.68E-15 | 1.50E-07    | 9.90E-12 | 4.11E-15 | 1.67E-07    | 3.84E-11 |

|                           |        |                |           |          |             |          |          |             |          |
|---------------------------|--------|----------------|-----------|----------|-------------|----------|----------|-------------|----------|
| phe.Fasting_rs142789100S8 | DIAPH1 | rs116011837S9  | BRD2      | 9.60E-12 | 0.000392176 | 1.53E-08 | 9.05E-15 | 3.68E-07    | 7.90E-11 |
| phe.Fasting_rs142789100S8 | DIAPH1 | rs116079984S8  | KPNA3     | 5.05E-16 | 2.06E-08    | 1.59E-12 | 2.56E-14 | 1.04E-06    | 1.94E-10 |
| phe.Fasting_rs142789100S8 | DIAPH1 | rs116120727S9  | BRD2      | 9.60E-12 | 0.000392176 | 1.53E-08 | 9.05E-15 | 3.68E-07    | 7.90E-11 |
| phe.Fasting_rs142789100S8 | DIAPH1 | rs116548615S8  | TMEM45B   | 2.95E-17 | 1.21E-09    | 1.69E-13 | 1.76E-12 | 7.17E-05    | 7.72E-09 |
| phe.Fasting_rs142789100S8 | DIAPH1 | rs146815317S5  | KPNA3     | 5.05E-16 | 2.06E-08    | 1.59E-12 | 2.34E-14 | 9.53E-07    | 1.79E-10 |
| phe.Fasting_rs142789100S8 | DIAPH1 | rs150117838S8  | KPNA3     | 5.05E-16 | 2.06E-08    | 1.59E-12 | 2.16E-14 | 8.80E-07    | 1.71E-10 |
| phe.Fasting_rs142789100S8 | DIAPH1 | rs16894241 S4  | HIST1H2BK | 3.73E-12 | 0.000152384 | 6.73E-09 | 6.62E-15 | 2.69E-07    | 5.94E-11 |
| phe.Fasting_rs142789100S8 | DIAPH1 | rs57503635 S3  | NA        | 1.28E-16 | 5.23E-09    | 5.19E-13 | 6.61E-15 | 2.69E-07    | 5.94E-11 |
| phe.Fasting_rs142789100S8 | DIAPH1 | rs7256517 S7   | CYTH2     | 1.59E-16 | 6.48E-09    | 6.03E-13 | 9.69E-13 | 3.95E-05    | 4.59E-09 |
| phe.Fasting_rs142789100S8 | DIAPH1 | rs73392640 S8  | POLR3B    | 4.58E-11 | 0.00187102  | 6.24E-08 | 6.82E-12 | 0.000277641 | 2.62E-08 |
| phe.Fasting_rs142789100S8 | DIAPH1 | rs74914207 S24 | NA        | 2.89E-11 | 0.00117833  | 4.13E-08 | 1.56E-11 | 0.000634366 | 5.60E-08 |
| phe.Fasting_rs142789100S8 | DIAPH1 | rs75758702 S24 | NA        | 1.04E-17 | 4.25E-10    | 9.89E-14 | 2.85E-11 | 0.00115844  | 9.77E-08 |
| phe.Fasting_rs142789100S8 | DIAPH1 | rs7763107 S8   | FARS2     | 9.44E-17 | 3.86E-09    | 4.06E-13 | 1.60E-12 | 6.52E-05    | 7.13E-09 |
| phe.Fasting_rs142789100S8 | DIAPH1 | rs77798597 S7  | KPNA3     | 5.05E-16 | 2.06E-08    | 1.59E-12 | 2.16E-14 | 8.80E-07    | 1.71E-10 |
| phe.Fasting_rs142789100S8 | DIAPH1 | rs78697063 S5  | MSI2      | 7.77E-20 | 3.17E-12    | 2.23E-14 | 1.45E-10 | 0.00591847  | 4.35E-07 |
| phe.Fasting_rs142789100S8 | DIAPH1 | rs78736524 S5  | KPNA3     | 5.05E-16 | 2.06E-08    | 1.59E-12 | 2.34E-14 | 9.53E-07    | 1.79E-10 |
| phe.Fasting_rs142789100S8 | DIAPH1 | rs79781495 S8  | KPNA3     | 5.05E-16 | 2.06E-08    | 1.59E-12 | 2.16E-14 | 8.80E-07    | 1.71E-10 |
| phe.Fasting_rs142789100S8 | DIAPH1 | rs80332465 S5  | KPNA3     | 5.36E-16 | 2.19E-08    | 1.67E-12 | 2.32E-14 | 9.45E-07    | 1.79E-10 |
| phe.Fasting_rs142789100S8 | DIAPH1 | rs80334773 S5  | KPNA3     | 5.36E-16 | 2.19E-08    | 1.67E-12 | 2.32E-14 | 9.45E-07    | 1.79E-10 |
| phe.Fasting_rs142812798S7 | DIAPH1 | rs112089881S8  | ZFAND4    | 3.24E-18 | 1.32E-10    | 5.45E-14 | 1.95E-10 | 0.00795558  | 5.56E-07 |
| phe.Fasting_rs142812798S7 | DIAPH1 | rs115787552S5  | KPNA3     | 5.05E-16 | 2.06E-08    | 1.59E-12 | 2.34E-14 | 9.53E-07    | 1.79E-10 |
| phe.Fasting_rs142812798S7 | DIAPH1 | rs115888477S8  | NA        | 3.68E-15 | 1.50E-07    | 9.90E-12 | 4.11E-15 | 1.67E-07    | 3.84E-11 |
| phe.Fasting_rs142812798S7 | DIAPH1 | rs116011837S9  | BRD2      | 9.60E-12 | 0.000392176 | 1.53E-08 | 9.05E-15 | 3.68E-07    | 7.90E-11 |
| phe.Fasting_rs142812798S7 | DIAPH1 | rs116079984S8  | KPNA3     | 5.05E-16 | 2.06E-08    | 1.59E-12 | 2.56E-14 | 1.04E-06    | 1.94E-10 |
| phe.Fasting_rs142812798S7 | DIAPH1 | rs116120727S9  | BRD2      | 9.60E-12 | 0.000392176 | 1.53E-08 | 9.05E-15 | 3.68E-07    | 7.90E-11 |
| phe.Fasting_rs142812798S7 | DIAPH1 | rs116548615S8  | TMEM45B   | 2.95E-17 | 1.21E-09    | 1.69E-13 | 1.76E-12 | 7.17E-05    | 7.72E-09 |
| phe.Fasting_rs142812798S7 | DIAPH1 | rs146815317S5  | KPNA3     | 5.05E-16 | 2.06E-08    | 1.59E-12 | 2.34E-14 | 9.53E-07    | 1.79E-10 |
| phe.Fasting_rs142812798S7 | DIAPH1 | rs150117838S8  | KPNA3     | 5.05E-16 | 2.06E-08    | 1.59E-12 | 2.16E-14 | 8.80E-07    | 1.71E-10 |
| phe.Fasting_rs142812798S7 | DIAPH1 | rs16894241 S4  | HIST1H2BK | 3.73E-12 | 0.000152384 | 6.73E-09 | 6.62E-15 | 2.69E-07    | 5.94E-11 |
| phe.Fasting_rs142812798S7 | DIAPH1 | rs57503635 S3  | NA        | 1.28E-16 | 5.23E-09    | 5.19E-13 | 6.61E-15 | 2.69E-07    | 5.94E-11 |
| phe.Fasting_rs142812798S7 | DIAPH1 | rs7256517 S7   | CYTH2     | 1.59E-16 | 6.48E-09    | 6.03E-13 | 9.69E-13 | 3.95E-05    | 4.59E-09 |
| phe.Fasting_rs142812798S7 | DIAPH1 | rs73392640 S8  | POLR3B    | 4.58E-11 | 0.00187102  | 6.24E-08 | 6.82E-12 | 0.000277641 | 2.62E-08 |
| phe.Fasting_rs142812798S7 | DIAPH1 | rs74914207 S24 | NA        | 2.89E-11 | 0.00117833  | 4.13E-08 | 1.56E-11 | 0.000634366 | 5.60E-08 |
| phe.Fasting_rs142812798S7 | DIAPH1 | rs75758702 S24 | NA        | 1.04E-17 | 4.25E-10    | 9.89E-14 | 2.85E-11 | 0.00115844  | 9.77E-08 |
| phe.Fasting_rs142812798S7 | DIAPH1 | rs7763107 S8   | FARS2     | 9.44E-17 | 3.86E-09    | 4.06E-13 | 1.60E-12 | 6.52E-05    | 7.13E-09 |
| phe.Fasting_rs142812798S7 | DIAPH1 | rs77798597 S7  | KPNA3     | 5.05E-16 | 2.06E-08    | 1.59E-12 | 2.16E-14 | 8.80E-07    | 1.71E-10 |
| phe.Fasting_rs142812798S7 | DIAPH1 | rs78697063 S5  | MSI2      | 7.77E-20 | 3.17E-12    | 2.23E-14 | 1.45E-10 | 0.00591847  | 4.35E-07 |
| phe.Fasting_rs142812798S7 | DIAPH1 | rs78736524 S5  | KPNA3     | 5.05E-16 | 2.06E-08    | 1.59E-12 | 2.34E-14 | 9.53E-07    | 1.79E-10 |
| phe.Fasting_rs142812798S7 | DIAPH1 | rs79781495 S8  | KPNA3     | 5.05E-16 | 2.06E-08    | 1.59E-12 | 2.16E-14 | 8.80E-07    | 1.71E-10 |
| phe.Fasting_rs142812798S7 | DIAPH1 | rs80332465 S5  | KPNA3     | 5.36E-16 | 2.19E-08    | 1.67E-12 | 2.32E-14 | 9.45E-07    | 1.79E-10 |

|              |                |             |                |           |          |             |          |          |             |          |
|--------------|----------------|-------------|----------------|-----------|----------|-------------|----------|----------|-------------|----------|
| phe.Fasting_ | rs142812798S7  | DIAPH1      | rs80334773 S5  | KPNA3     | 5.36E-16 | 2.19E-08    | 1.67E-12 | 2.32E-14 | 9.45E-07    | 1.79E-10 |
| phe.Fasting_ | rs142888461S7  | NEK1        | rs113357907S24 | ISL1      | 9.27E-18 | 3.79E-10    | 9.26E-14 | 6.30E-16 | 2.56E-08    | 1.16E-11 |
| phe.Fasting_ | rs142888461S7  | NEK1        | rs116011837S9  | BRD2      | 3.44E-17 | 1.40E-09    | 1.90E-13 | 1.14E-10 | 0.00465709  | 3.47E-07 |
| phe.Fasting_ | rs142888461S7  | NEK1        | rs116120727S9  | BRD2      | 3.44E-17 | 1.40E-09    | 1.90E-13 | 1.14E-10 | 0.00465709  | 3.47E-07 |
| phe.Fasting_ | rs142888461S7  | NEK1        | rs6881310 S23  | ISL1      | 6.43E-17 | 2.62E-09    | 2.96E-13 | 1.73E-12 | 7.04E-05    | 7.61E-09 |
| phe.Fasting_ | rs142888461S7  | NEK1        | rs77444916 S23 | LOC642366 | 2.32E-17 | 9.46E-10    | 1.47E-13 | 5.90E-16 | 2.40E-08    | 1.16E-11 |
| phe.Fasting_ | rs142888461S7  | NEK1        | rs80258830 S24 | LOC642366 | 2.32E-17 | 9.46E-10    | 1.47E-13 | 5.90E-16 | 2.40E-08    | 1.16E-11 |
| phe.Fasting_ | rs143377827S13 | "DIAPH1,LOC | rs112089881S8  | ZFAND4    | 3.54E-18 | 1.44E-10    | 5.67E-14 | 1.61E-10 | 0.00653416  | 4.68E-07 |
| phe.Fasting_ | rs143377827S13 | "DIAPH1,LOC | rs115787552S5  | KPNA3     | 5.29E-16 | 2.16E-08    | 1.66E-12 | 1.98E-14 | 8.05E-07    | 1.59E-10 |
| phe.Fasting_ | rs143377827S13 | "DIAPH1,LOC | rs115888477S8  | NA        | 3.83E-15 | 1.56E-07    | 1.02E-11 | 3.47E-15 | 1.41E-07    | 3.32E-11 |
| phe.Fasting_ | rs143377827S13 | "DIAPH1,LOC | rs116011837S9  | BRD2      | 8.87E-12 | 0.000362046 | 1.47E-08 | 7.51E-15 | 3.06E-07    | 6.66E-11 |
| phe.Fasting_ | rs143377827S13 | "DIAPH1,LOC | rs116079984S8  | KPNA3     | 5.29E-16 | 2.16E-08    | 1.66E-12 | 2.14E-14 | 8.71E-07    | 1.70E-10 |
| phe.Fasting_ | rs143377827S13 | "DIAPH1,LOC | rs116120727S9  | BRD2      | 8.87E-12 | 0.000362046 | 1.47E-08 | 7.51E-15 | 3.06E-07    | 6.66E-11 |
| phe.Fasting_ | rs143377827S13 | "DIAPH1,LOC | rs116548615S8  | TMEM45B   | 3.14E-17 | 1.28E-09    | 1.77E-13 | 1.39E-12 | 5.67E-05    | 6.30E-09 |
| phe.Fasting_ | rs143377827S13 | "DIAPH1,LOC | rs146815317S5  | KPNA3     | 5.29E-16 | 2.16E-08    | 1.66E-12 | 1.98E-14 | 8.05E-07    | 1.59E-10 |
| phe.Fasting_ | rs143377827S13 | "DIAPH1,LOC | rs150117838S8  | KPNA3     | 5.29E-16 | 2.16E-08    | 1.66E-12 | 1.82E-14 | 7.42E-07    | 1.50E-10 |
| phe.Fasting_ | rs143377827S13 | "DIAPH1,LOC | rs16894241 S4  | HIST1H2BK | 3.21E-12 | 0.000131135 | 5.86E-09 | 5.53E-15 | 2.25E-07    | 5.05E-11 |
| phe.Fasting_ | rs143377827S13 | "DIAPH1,LOC | rs57503635 S3  | NA        | 1.33E-16 | 5.44E-09    | 5.32E-13 | 5.51E-15 | 2.24E-07    | 5.04E-11 |
| phe.Fasting_ | rs143377827S13 | "DIAPH1,LOC | rs7256517 S7   | CYTH2     | 1.72E-16 | 7.03E-09    | 6.15E-13 | 7.89E-13 | 3.21E-05    | 3.77E-09 |
| phe.Fasting_ | rs143377827S13 | "DIAPH1,LOC | rs73392640 S8  | POLR3B    | 3.87E-11 | 0.00157908  | 5.34E-08 | 5.63E-12 | 0.000229351 | 2.20E-08 |
| phe.Fasting_ | rs143377827S13 | "DIAPH1,LOC | rs74914207 S24 | NA        | 2.84E-11 | 0.00116023  | 4.07E-08 | 1.25E-11 | 0.000510414 | 4.59E-08 |
| phe.Fasting_ | rs143377827S13 | "DIAPH1,LOC | rs75758702 S24 | NA        | 1.14E-17 | 4.64E-10    | 1.02E-13 | 2.21E-11 | 0.000898496 | 7.70E-08 |
| phe.Fasting_ | rs143377827S13 | "DIAPH1,LOC | rs7763107 S8   | FARS2     | 1.05E-16 | 4.27E-09    | 4.43E-13 | 1.31E-12 | 5.33E-05    | 5.92E-09 |
| phe.Fasting_ | rs143377827S13 | "DIAPH1,LOC | rs77798597 S7  | KPNA3     | 5.29E-16 | 2.16E-08    | 1.66E-12 | 1.82E-14 | 7.42E-07    | 1.50E-10 |
| phe.Fasting_ | rs143377827S13 | "DIAPH1,LOC | rs78697063 S5  | MSI2      | 8.73E-20 | 3.57E-12    | 2.23E-14 | 1.11E-10 | 0.00451638  | 3.38E-07 |
| phe.Fasting_ | rs143377827S13 | "DIAPH1,LOC | rs78736524 S5  | KPNA3     | 5.29E-16 | 2.16E-08    | 1.66E-12 | 1.98E-14 | 8.05E-07    | 1.59E-10 |
| phe.Fasting_ | rs143377827S13 | "DIAPH1,LOC | rs79781495 S8  | KPNA3     | 5.29E-16 | 2.16E-08    | 1.66E-12 | 1.82E-14 | 7.42E-07    | 1.50E-10 |
| phe.Fasting_ | rs143377827S13 | "DIAPH1,LOC | rs80332465 S5  | KPNA3     | 5.62E-16 | 2.29E-08    | 1.75E-12 | 1.96E-14 | 7.98E-07    | 1.58E-10 |
| phe.Fasting_ | rs143377827S13 | "DIAPH1,LOC | rs80334773 S5  | KPNA3     | 5.62E-16 | 2.29E-08    | 1.75E-12 | 1.96E-14 | 7.98E-07    | 1.58E-10 |
| phe.Fasting_ | rs143691978S11 | DIAPH1      | rs112089881S8  | ZFAND4    | 3.24E-18 | 1.32E-10    | 5.45E-14 | 2.00E-10 | 0.0081353   | 5.68E-07 |
| phe.Fasting_ | rs143691978S11 | DIAPH1      | rs115787552S5  | KPNA3     | 5.05E-16 | 2.06E-08    | 1.59E-12 | 2.49E-14 | 1.01E-06    | 1.89E-10 |
| phe.Fasting_ | rs143691978S11 | DIAPH1      | rs115888477S8  | NA        | 3.68E-15 | 1.50E-07    | 9.90E-12 | 4.39E-15 | 1.79E-07    | 4.08E-11 |
| phe.Fasting_ | rs143691978S11 | DIAPH1      | rs116011837S9  | BRD2      | 9.60E-12 | 0.000392176 | 1.53E-08 | 9.42E-15 | 3.84E-07    | 8.18E-11 |
| phe.Fasting_ | rs143691978S11 | DIAPH1      | rs116079984S8  | KPNA3     | 5.05E-16 | 2.06E-08    | 1.59E-12 | 2.73E-14 | 1.11E-06    | 2.06E-10 |
| phe.Fasting_ | rs143691978S11 | DIAPH1      | rs116120727S9  | BRD2      | 9.60E-12 | 0.000392176 | 1.53E-08 | 9.42E-15 | 3.84E-07    | 8.18E-11 |
| phe.Fasting_ | rs143691978S11 | DIAPH1      | rs116548615S8  | TMEM45B   | 2.95E-17 | 1.21E-09    | 1.69E-13 | 1.84E-12 | 7.48E-05    | 8.04E-09 |
| phe.Fasting_ | rs143691978S11 | DIAPH1      | rs146815317S5  | KPNA3     | 5.05E-16 | 2.06E-08    | 1.59E-12 | 2.49E-14 | 1.01E-06    | 1.89E-10 |
| phe.Fasting_ | rs143691978S11 | DIAPH1      | rs150117838S8  | KPNA3     | 5.05E-16 | 2.06E-08    | 1.59E-12 | 2.30E-14 | 9.36E-07    | 1.79E-10 |
| phe.Fasting_ | rs143691978S11 | DIAPH1      | rs16894241 S4  | HIST1H2BK | 3.73E-12 | 0.000152384 | 6.73E-09 | 7.18E-15 | 2.92E-07    | 6.39E-11 |
| phe.Fasting_ | rs143691978S11 | DIAPH1      | rs57503635 S3  | NA        | 1.28E-16 | 5.23E-09    | 5.19E-13 | 7.18E-15 | 2.92E-07    | 6.39E-11 |

|                            |        |             |     |           |          |             |          |          |             |          |
|----------------------------|--------|-------------|-----|-----------|----------|-------------|----------|----------|-------------|----------|
| phe.Fasting_rs143691978S11 | DIAPH1 | rs7256517   | S7  | CYTH2     | 1.59E-16 | 6.48E-09    | 6.03E-13 | 1.01E-12 | 4.13E-05    | 4.74E-09 |
| phe.Fasting_rs143691978S11 | DIAPH1 | rs73392640  | S8  | POLR3B    | 4.58E-11 | 0.00187102  | 6.24E-08 | 1.10E-11 | 0.000446024 | 4.04E-08 |
| phe.Fasting_rs143691978S11 | DIAPH1 | rs74914207  | S24 | NA        | 2.89E-11 | 0.00117833  | 4.13E-08 | 1.71E-11 | 0.000696754 | 6.13E-08 |
| phe.Fasting_rs143691978S11 | DIAPH1 | rs75758702  | S24 | NA        | 1.04E-17 | 4.25E-10    | 9.89E-14 | 2.90E-11 | 0.00117848  | 9.92E-08 |
| phe.Fasting_rs143691978S11 | DIAPH1 | rs7763107   | S8  | FARS2     | 9.44E-17 | 3.86E-09    | 4.06E-13 | 1.67E-12 | 6.82E-05    | 7.43E-09 |
| phe.Fasting_rs143691978S11 | DIAPH1 | rs77798597  | S7  | KPNA3     | 5.05E-16 | 2.06E-08    | 1.59E-12 | 2.30E-14 | 9.36E-07    | 1.79E-10 |
| phe.Fasting_rs143691978S11 | DIAPH1 | rs78697063  | S5  | MSI2      | 7.77E-20 | 3.17E-12    | 2.23E-14 | 1.49E-10 | 0.00608249  | 4.45E-07 |
| phe.Fasting_rs143691978S11 | DIAPH1 | rs78736524  | S5  | KPNA3     | 5.05E-16 | 2.06E-08    | 1.59E-12 | 2.49E-14 | 1.01E-06    | 1.89E-10 |
| phe.Fasting_rs143691978S11 | DIAPH1 | rs79781495  | S8  | KPNA3     | 5.05E-16 | 2.06E-08    | 1.59E-12 | 2.30E-14 | 9.36E-07    | 1.79E-10 |
| phe.Fasting_rs143691978S11 | DIAPH1 | rs80332465  | S5  | KPNA3     | 5.36E-16 | 2.19E-08    | 1.67E-12 | 2.47E-14 | 1.00E-06    | 1.88E-10 |
| phe.Fasting_rs143691978S11 | DIAPH1 | rs80334773  | S5  | KPNA3     | 5.36E-16 | 2.19E-08    | 1.67E-12 | 2.47E-14 | 1.00E-06    | 1.88E-10 |
| phe.Fasting_rs144081334S11 | DIAPH1 | rs112089881 | S8  | ZFAND4    | 3.24E-18 | 1.32E-10    | 5.45E-14 | 2.00E-10 | 0.0081353   | 5.68E-07 |
| phe.Fasting_rs144081334S11 | DIAPH1 | rs115787552 | S5  | KPNA3     | 5.05E-16 | 2.06E-08    | 1.59E-12 | 2.49E-14 | 1.01E-06    | 1.89E-10 |
| phe.Fasting_rs144081334S11 | DIAPH1 | rs115888477 | S8  | NA        | 3.68E-15 | 1.50E-07    | 9.90E-12 | 4.39E-15 | 1.79E-07    | 4.08E-11 |
| phe.Fasting_rs144081334S11 | DIAPH1 | rs116011837 | S9  | BRD2      | 9.60E-12 | 0.000392176 | 1.53E-08 | 9.42E-15 | 3.84E-07    | 8.18E-11 |
| phe.Fasting_rs144081334S11 | DIAPH1 | rs116079984 | S8  | KPNA3     | 5.05E-16 | 2.06E-08    | 1.59E-12 | 2.73E-14 | 1.11E-06    | 2.06E-10 |
| phe.Fasting_rs144081334S11 | DIAPH1 | rs116120727 | S9  | BRD2      | 9.60E-12 | 0.000392176 | 1.53E-08 | 9.42E-15 | 3.84E-07    | 8.18E-11 |
| phe.Fasting_rs144081334S11 | DIAPH1 | rs116548615 | S8  | TMEM45B   | 2.95E-17 | 1.21E-09    | 1.69E-13 | 1.84E-12 | 7.48E-05    | 8.04E-09 |
| phe.Fasting_rs144081334S11 | DIAPH1 | rs146815317 | S5  | KPNA3     | 5.05E-16 | 2.06E-08    | 1.59E-12 | 2.49E-14 | 1.01E-06    | 1.89E-10 |
| phe.Fasting_rs144081334S11 | DIAPH1 | rs150117838 | S8  | KPNA3     | 5.05E-16 | 2.06E-08    | 1.59E-12 | 2.30E-14 | 9.36E-07    | 1.79E-10 |
| phe.Fasting_rs144081334S11 | DIAPH1 | rs16894241  | S4  | HIST1H2BK | 3.73E-12 | 0.000152384 | 6.73E-09 | 7.18E-15 | 2.92E-07    | 6.39E-11 |
| phe.Fasting_rs144081334S11 | DIAPH1 | rs57503635  | S3  | NA        | 1.28E-16 | 5.23E-09    | 5.19E-13 | 7.18E-15 | 2.92E-07    | 6.39E-11 |
| phe.Fasting_rs144081334S11 | DIAPH1 | rs7256517   | S7  | CYTH2     | 1.59E-16 | 6.48E-09    | 6.03E-13 | 1.01E-12 | 4.13E-05    | 4.74E-09 |
| phe.Fasting_rs144081334S11 | DIAPH1 | rs73392640  | S8  | POLR3B    | 4.58E-11 | 0.00187102  | 6.24E-08 | 1.10E-11 | 0.000446024 | 4.04E-08 |
| phe.Fasting_rs144081334S11 | DIAPH1 | rs74914207  | S24 | NA        | 2.89E-11 | 0.00117833  | 4.13E-08 | 1.71E-11 | 0.000696754 | 6.13E-08 |
| phe.Fasting_rs144081334S11 | DIAPH1 | rs75758702  | S24 | NA        | 1.04E-17 | 4.25E-10    | 9.89E-14 | 2.90E-11 | 0.00117848  | 9.92E-08 |
| phe.Fasting_rs144081334S11 | DIAPH1 | rs7763107   | S8  | FARS2     | 9.44E-17 | 3.86E-09    | 4.06E-13 | 1.67E-12 | 6.82E-05    | 7.43E-09 |
| phe.Fasting_rs144081334S11 | DIAPH1 | rs77798597  | S7  | KPNA3     | 5.05E-16 | 2.06E-08    | 1.59E-12 | 2.30E-14 | 9.36E-07    | 1.79E-10 |
| phe.Fasting_rs144081334S11 | DIAPH1 | rs78697063  | S5  | MSI2      | 7.77E-20 | 3.17E-12    | 2.23E-14 | 1.49E-10 | 0.00608249  | 4.45E-07 |
| phe.Fasting_rs144081334S11 | DIAPH1 | rs78736524  | S5  | KPNA3     | 5.05E-16 | 2.06E-08    | 1.59E-12 | 2.49E-14 | 1.01E-06    | 1.89E-10 |
| phe.Fasting_rs144081334S11 | DIAPH1 | rs79781495  | S8  | KPNA3     | 5.05E-16 | 2.06E-08    | 1.59E-12 | 2.30E-14 | 9.36E-07    | 1.79E-10 |
| phe.Fasting_rs144081334S11 | DIAPH1 | rs80332465  | S5  | KPNA3     | 5.36E-16 | 2.19E-08    | 1.67E-12 | 2.47E-14 | 1.00E-06    | 1.88E-10 |
| phe.Fasting_rs144081334S11 | DIAPH1 | rs80334773  | S5  | KPNA3     | 5.36E-16 | 2.19E-08    | 1.67E-12 | 2.47E-14 | 1.00E-06    | 1.88E-10 |
| phe.Fasting_rs144613910S8  | DIAPH1 | rs115787552 | S5  | KPNA3     | 2.97E-15 | 1.21E-07    | 8.14E-12 | 1.18E-13 | 4.80E-06    | 7.06E-10 |
| phe.Fasting_rs144613910S8  | DIAPH1 | rs115888477 | S8  | NA        | 2.03E-14 | 8.28E-07    | 5.02E-11 | 2.21E-14 | 8.99E-07    | 1.73E-10 |
| phe.Fasting_rs144613910S8  | DIAPH1 | rs116011837 | S9  | BRD2      | 4.89E-11 | 0.00199774  | 6.62E-08 | 4.07E-14 | 1.66E-06    | 2.85E-10 |
| phe.Fasting_rs144613910S8  | DIAPH1 | rs116079984 | S8  | KPNA3     | 2.97E-15 | 1.21E-07    | 8.14E-12 | 1.24E-13 | 5.04E-06    | 7.34E-10 |
| phe.Fasting_rs144613910S8  | DIAPH1 | rs116120727 | S9  | BRD2      | 4.89E-11 | 0.00199774  | 6.62E-08 | 4.07E-14 | 1.66E-06    | 2.85E-10 |
| phe.Fasting_rs144613910S8  | DIAPH1 | rs116548615 | S8  | TMEM45B   | 1.73E-16 | 7.06E-09    | 6.15E-13 | 8.70E-12 | 0.000354153 | 3.26E-08 |
| phe.Fasting_rs144613910S8  | DIAPH1 | rs146815317 | S5  | KPNA3     | 2.97E-15 | 1.21E-07    | 8.14E-12 | 1.18E-13 | 4.80E-06    | 7.06E-10 |

|                            |        |                |           |          |             |          |          |             |          |
|----------------------------|--------|----------------|-----------|----------|-------------|----------|----------|-------------|----------|
| phe.Fasting_rs144613910S8  | DIAPH1 | rs150117838S8  | KPNA3     | 2.97E-15 | 1.21E-07    | 8.14E-12 | 1.09E-13 | 4.44E-06    | 6.79E-10 |
| phe.Fasting_rs144613910S8  | DIAPH1 | rs16894241 S4  | HIST1H2BK | 1.99E-11 | 0.000812315 | 2.96E-08 | 3.44E-14 | 1.40E-06    | 2.50E-10 |
| phe.Fasting_rs144613910S8  | DIAPH1 | rs57503635 S3  | NA        | 6.34E-16 | 2.59E-08    | 1.95E-12 | 3.17E-14 | 1.29E-06    | 2.34E-10 |
| phe.Fasting_rs144613910S8  | DIAPH1 | rs7256517 S7   | CYTH2     | 1.04E-15 | 4.24E-08    | 3.06E-12 | 4.82E-12 | 0.000196022 | 1.91E-08 |
| phe.Fasting_rs144613910S8  | DIAPH1 | rs73392640 S8  | POLR3B    | 2.02E-10 | 0.00826001  | 2.49E-07 | 5.19E-11 | 0.00211214  | 1.67E-07 |
| phe.Fasting_rs144613910S8  | DIAPH1 | rs73619637 S8  | NA        | 1.44E-15 | 5.89E-08    | 4.14E-12 | 2.05E-10 | 0.00833668  | 5.78E-07 |
| phe.Fasting_rs144613910S8  | DIAPH1 | rs74914207 S24 | NA        | 1.37E-10 | 0.00558626  | 1.73E-07 | 9.12E-11 | 0.0037135   | 2.80E-07 |
| phe.Fasting_rs144613910S8  | DIAPH1 | rs75758702 S24 | NA        | 7.02E-17 | 2.87E-09    | 3.16E-13 | 1.57E-10 | 0.00638323  | 4.59E-07 |
| phe.Fasting_rs144613910S8  | DIAPH1 | rs7763107 S8   | FARS2     | 5.78E-16 | 2.36E-08    | 1.79E-12 | 9.23E-12 | 0.000375564 | 3.44E-08 |
| phe.Fasting_rs144613910S8  | DIAPH1 | rs77798597 S7  | KPNA3     | 2.97E-15 | 1.21E-07    | 8.14E-12 | 1.09E-13 | 4.44E-06    | 6.79E-10 |
| phe.Fasting_rs144613910S8  | DIAPH1 | rs78516788 S8  | SLC38A1   | 2.75E-11 | 0.00112269  | 3.94E-08 | 2.44E-10 | 0.00992686  | 6.74E-07 |
| phe.Fasting_rs144613910S8  | DIAPH1 | rs78736524 S5  | KPNA3     | 2.97E-15 | 1.21E-07    | 8.14E-12 | 1.18E-13 | 4.80E-06    | 7.06E-10 |
| phe.Fasting_rs144613910S8  | DIAPH1 | rs79781495 S8  | KPNA3     | 2.97E-15 | 1.21E-07    | 8.14E-12 | 1.09E-13 | 4.44E-06    | 6.79E-10 |
| phe.Fasting_rs144613910S8  | DIAPH1 | rs80332465 S5  | KPNA3     | 3.13E-15 | 1.28E-07    | 8.51E-12 | 1.17E-13 | 4.77E-06    | 7.06E-10 |
| phe.Fasting_rs144613910S8  | DIAPH1 | rs80334773 S5  | KPNA3     | 3.13E-15 | 1.28E-07    | 8.51E-12 | 1.17E-13 | 4.77E-06    | 7.06E-10 |
| phe.Fasting_rs145027704S11 | DIAPH1 | rs112089881S8  | ZFAND4    | 3.24E-18 | 1.32E-10    | 5.45E-14 | 2.00E-10 | 0.0081353   | 5.68E-07 |
| phe.Fasting_rs145027704S11 | DIAPH1 | rs115787552S5  | KPNA3     | 5.05E-16 | 2.06E-08    | 1.59E-12 | 2.49E-14 | 1.01E-06    | 1.89E-10 |
| phe.Fasting_rs145027704S11 | DIAPH1 | rs115888477S8  | NA        | 3.68E-15 | 1.50E-07    | 9.90E-12 | 4.39E-15 | 1.79E-07    | 4.08E-11 |
| phe.Fasting_rs145027704S11 | DIAPH1 | rs116011837S9  | BRD2      | 9.60E-12 | 0.000392176 | 1.53E-08 | 9.42E-15 | 3.84E-07    | 8.18E-11 |
| phe.Fasting_rs145027704S11 | DIAPH1 | rs116079984S8  | KPNA3     | 5.05E-16 | 2.06E-08    | 1.59E-12 | 2.73E-14 | 1.11E-06    | 2.06E-10 |
| phe.Fasting_rs145027704S11 | DIAPH1 | rs116120727S9  | BRD2      | 9.60E-12 | 0.000392176 | 1.53E-08 | 9.42E-15 | 3.84E-07    | 8.18E-11 |
| phe.Fasting_rs145027704S11 | DIAPH1 | rs116548615S8  | TMEM45B   | 2.95E-17 | 1.21E-09    | 1.69E-13 | 1.84E-12 | 7.48E-05    | 8.04E-09 |
| phe.Fasting_rs145027704S11 | DIAPH1 | rs146815317S5  | KPNA3     | 5.05E-16 | 2.06E-08    | 1.59E-12 | 2.49E-14 | 1.01E-06    | 1.89E-10 |
| phe.Fasting_rs145027704S11 | DIAPH1 | rs150117838S8  | KPNA3     | 5.05E-16 | 2.06E-08    | 1.59E-12 | 2.30E-14 | 9.36E-07    | 1.79E-10 |
| phe.Fasting_rs145027704S11 | DIAPH1 | rs16894241 S4  | HIST1H2BK | 3.73E-12 | 0.000152384 | 6.73E-09 | 7.18E-15 | 2.92E-07    | 6.39E-11 |
| phe.Fasting_rs145027704S11 | DIAPH1 | rs57503635 S3  | NA        | 1.28E-16 | 5.23E-09    | 5.19E-13 | 7.18E-15 | 2.92E-07    | 6.39E-11 |
| phe.Fasting_rs145027704S11 | DIAPH1 | rs7256517 S7   | CYTH2     | 1.59E-16 | 6.48E-09    | 6.03E-13 | 1.01E-12 | 4.13E-05    | 4.74E-09 |
| phe.Fasting_rs145027704S11 | DIAPH1 | rs73392640 S8  | POLR3B    | 4.58E-11 | 0.00187102  | 6.24E-08 | 1.10E-11 | 0.000446024 | 4.04E-08 |
| phe.Fasting_rs145027704S11 | DIAPH1 | rs74914207 S24 | NA        | 2.89E-11 | 0.00117833  | 4.13E-08 | 1.71E-11 | 0.000696754 | 6.13E-08 |
| phe.Fasting_rs145027704S11 | DIAPH1 | rs75758702 S24 | NA        | 1.04E-17 | 4.25E-10    | 9.89E-14 | 2.90E-11 | 0.00117848  | 9.92E-08 |
| phe.Fasting_rs145027704S11 | DIAPH1 | rs7763107 S8   | FARS2     | 9.44E-17 | 3.86E-09    | 4.06E-13 | 1.67E-12 | 6.82E-05    | 7.43E-09 |
| phe.Fasting_rs145027704S11 | DIAPH1 | rs77798597 S7  | KPNA3     | 5.05E-16 | 2.06E-08    | 1.59E-12 | 2.30E-14 | 9.36E-07    | 1.79E-10 |
| phe.Fasting_rs145027704S11 | DIAPH1 | rs78697063 S5  | MSI2      | 7.77E-20 | 3.17E-12    | 2.23E-14 | 1.49E-10 | 0.00608249  | 4.45E-07 |
| phe.Fasting_rs145027704S11 | DIAPH1 | rs78736524 S5  | KPNA3     | 5.05E-16 | 2.06E-08    | 1.59E-12 | 2.49E-14 | 1.01E-06    | 1.89E-10 |
| phe.Fasting_rs145027704S11 | DIAPH1 | rs79781495 S8  | KPNA3     | 5.05E-16 | 2.06E-08    | 1.59E-12 | 2.30E-14 | 9.36E-07    | 1.79E-10 |
| phe.Fasting_rs145027704S11 | DIAPH1 | rs80332465 S5  | KPNA3     | 5.36E-16 | 2.19E-08    | 1.67E-12 | 2.47E-14 | 1.00E-06    | 1.88E-10 |
| phe.Fasting_rs145027704S11 | DIAPH1 | rs80334773 S5  | KPNA3     | 5.36E-16 | 2.19E-08    | 1.67E-12 | 2.47E-14 | 1.00E-06    | 1.88E-10 |
| phe.Fasting_rs146220673S7  | DIAPH1 | rs115787552S5  | KPNA3     | 2.97E-15 | 1.21E-07    | 8.14E-12 | 1.18E-13 | 4.80E-06    | 7.06E-10 |
| phe.Fasting_rs146220673S7  | DIAPH1 | rs115888477S8  | NA        | 2.03E-14 | 8.28E-07    | 5.02E-11 | 2.21E-14 | 8.99E-07    | 1.73E-10 |
| phe.Fasting_rs146220673S7  | DIAPH1 | rs116011837S9  | BRD2      | 4.89E-11 | 0.00199774  | 6.62E-08 | 4.07E-14 | 1.66E-06    | 2.85E-10 |

|                             |        |                |           |          |             |          |          |             |          |
|-----------------------------|--------|----------------|-----------|----------|-------------|----------|----------|-------------|----------|
| phe.Fasting_rs146220673 S7  | DIAPH1 | rs116079984 S8 | KPNA3     | 2.97E-15 | 1.21E-07    | 8.14E-12 | 1.24E-13 | 5.04E-06    | 7.34E-10 |
| phe.Fasting_rs146220673 S7  | DIAPH1 | rs116120727 S9 | BRD2      | 4.89E-11 | 0.00199774  | 6.62E-08 | 4.07E-14 | 1.66E-06    | 2.85E-10 |
| phe.Fasting_rs146220673 S7  | DIAPH1 | rs116548615 S8 | TMEM45B   | 1.73E-16 | 7.06E-09    | 6.15E-13 | 8.70E-12 | 0.000354153 | 3.26E-08 |
| phe.Fasting_rs146220673 S7  | DIAPH1 | rs146815317 S5 | KPNA3     | 2.97E-15 | 1.21E-07    | 8.14E-12 | 1.18E-13 | 4.80E-06    | 7.06E-10 |
| phe.Fasting_rs146220673 S7  | DIAPH1 | rs150117838 S8 | KPNA3     | 2.97E-15 | 1.21E-07    | 8.14E-12 | 1.09E-13 | 4.44E-06    | 6.79E-10 |
| phe.Fasting_rs146220673 S7  | DIAPH1 | rs16894241 S4  | HIST1H2BK | 1.99E-11 | 0.000812315 | 2.96E-08 | 3.44E-14 | 1.40E-06    | 2.50E-10 |
| phe.Fasting_rs146220673 S7  | DIAPH1 | rs57503635 S3  | NA        | 6.34E-16 | 2.59E-08    | 1.95E-12 | 3.17E-14 | 1.29E-06    | 2.34E-10 |
| phe.Fasting_rs146220673 S7  | DIAPH1 | rs7256517 S7   | CYTH2     | 1.04E-15 | 4.24E-08    | 3.06E-12 | 4.82E-12 | 0.000196022 | 1.91E-08 |
| phe.Fasting_rs146220673 S7  | DIAPH1 | rs73392640 S8  | POLR3B    | 2.02E-10 | 0.00826001  | 2.49E-07 | 5.19E-11 | 0.00211214  | 1.67E-07 |
| phe.Fasting_rs146220673 S7  | DIAPH1 | rs73619637 S8  | NA        | 1.44E-15 | 5.89E-08    | 4.14E-12 | 2.05E-10 | 0.00833668  | 5.78E-07 |
| phe.Fasting_rs146220673 S7  | DIAPH1 | rs74914207 S24 | NA        | 1.37E-10 | 0.00558626  | 1.73E-07 | 9.12E-11 | 0.0037135   | 2.80E-07 |
| phe.Fasting_rs146220673 S7  | DIAPH1 | rs75758702 S24 | NA        | 7.02E-17 | 2.87E-09    | 3.16E-13 | 1.57E-10 | 0.00638323  | 4.59E-07 |
| phe.Fasting_rs146220673 S7  | DIAPH1 | rs7763107 S8   | FARS2     | 5.78E-16 | 2.36E-08    | 1.79E-12 | 9.23E-12 | 0.000375564 | 3.44E-08 |
| phe.Fasting_rs146220673 S7  | DIAPH1 | rs77798597 S7  | KPNA3     | 2.97E-15 | 1.21E-07    | 8.14E-12 | 1.09E-13 | 4.44E-06    | 6.79E-10 |
| phe.Fasting_rs146220673 S7  | DIAPH1 | rs78516788 S8  | SLC38A1   | 2.75E-11 | 0.00112269  | 3.94E-08 | 2.44E-10 | 0.00992686  | 6.74E-07 |
| phe.Fasting_rs146220673 S7  | DIAPH1 | rs78736524 S5  | KPNA3     | 2.97E-15 | 1.21E-07    | 8.14E-12 | 1.18E-13 | 4.80E-06    | 7.06E-10 |
| phe.Fasting_rs146220673 S7  | DIAPH1 | rs79781495 S8  | KPNA3     | 2.97E-15 | 1.21E-07    | 8.14E-12 | 1.09E-13 | 4.44E-06    | 6.79E-10 |
| phe.Fasting_rs146220673 S7  | DIAPH1 | rs80332465 S5  | KPNA3     | 3.13E-15 | 1.28E-07    | 8.51E-12 | 1.17E-13 | 4.77E-06    | 7.06E-10 |
| phe.Fasting_rs146220673 S7  | DIAPH1 | rs80334773 S5  | KPNA3     | 3.13E-15 | 1.28E-07    | 8.51E-12 | 1.17E-13 | 4.77E-06    | 7.06E-10 |
| phe.Fasting_rs146622060 S13 | DIAPH1 | rs112089881 S8 | ZFAND4    | 3.24E-18 | 1.32E-10    | 5.45E-14 | 2.00E-10 | 0.0081353   | 5.68E-07 |
| phe.Fasting_rs146622060 S13 | DIAPH1 | rs115787552 S5 | KPNA3     | 5.05E-16 | 2.06E-08    | 1.59E-12 | 2.49E-14 | 1.01E-06    | 1.89E-10 |
| phe.Fasting_rs146622060 S13 | DIAPH1 | rs115888477 S8 | NA        | 3.68E-15 | 1.50E-07    | 9.90E-12 | 4.39E-15 | 1.79E-07    | 4.08E-11 |
| phe.Fasting_rs146622060 S13 | DIAPH1 | rs116011837 S9 | BRD2      | 9.60E-12 | 0.000392176 | 1.53E-08 | 9.42E-15 | 3.84E-07    | 8.18E-11 |
| phe.Fasting_rs146622060 S13 | DIAPH1 | rs116079984 S8 | KPNA3     | 5.05E-16 | 2.06E-08    | 1.59E-12 | 2.73E-14 | 1.11E-06    | 2.06E-10 |
| phe.Fasting_rs146622060 S13 | DIAPH1 | rs116120727 S9 | BRD2      | 9.60E-12 | 0.000392176 | 1.53E-08 | 9.42E-15 | 3.84E-07    | 8.18E-11 |
| phe.Fasting_rs146622060 S13 | DIAPH1 | rs116548615 S8 | TMEM45B   | 2.95E-17 | 1.21E-09    | 1.69E-13 | 1.84E-12 | 7.48E-05    | 8.04E-09 |
| phe.Fasting_rs146622060 S13 | DIAPH1 | rs146815317 S5 | KPNA3     | 5.05E-16 | 2.06E-08    | 1.59E-12 | 2.49E-14 | 1.01E-06    | 1.89E-10 |
| phe.Fasting_rs146622060 S13 | DIAPH1 | rs150117838 S8 | KPNA3     | 5.05E-16 | 2.06E-08    | 1.59E-12 | 2.30E-14 | 9.36E-07    | 1.79E-10 |
| phe.Fasting_rs146622060 S13 | DIAPH1 | rs16894241 S4  | HIST1H2BK | 3.73E-12 | 0.000152384 | 6.73E-09 | 7.18E-15 | 2.92E-07    | 6.39E-11 |
| phe.Fasting_rs146622060 S13 | DIAPH1 | rs57503635 S3  | NA        | 1.28E-16 | 5.23E-09    | 5.19E-13 | 7.18E-15 | 2.92E-07    | 6.39E-11 |
| phe.Fasting_rs146622060 S13 | DIAPH1 | rs7256517 S7   | CYTH2     | 1.59E-16 | 6.48E-09    | 6.03E-13 | 1.01E-12 | 4.13E-05    | 4.74E-09 |
| phe.Fasting_rs146622060 S13 | DIAPH1 | rs73392640 S8  | POLR3B    | 4.58E-11 | 0.00187102  | 6.24E-08 | 1.10E-11 | 0.000446024 | 4.04E-08 |
| phe.Fasting_rs146622060 S13 | DIAPH1 | rs74914207 S24 | NA        | 2.89E-11 | 0.00117833  | 4.13E-08 | 1.71E-11 | 0.000696754 | 6.13E-08 |
| phe.Fasting_rs146622060 S13 | DIAPH1 | rs75758702 S24 | NA        | 1.04E-17 | 4.25E-10    | 9.89E-14 | 2.90E-11 | 0.00117848  | 9.92E-08 |
| phe.Fasting_rs146622060 S13 | DIAPH1 | rs7763107 S8   | FARS2     | 9.44E-17 | 3.86E-09    | 4.06E-13 | 1.67E-12 | 6.82E-05    | 7.43E-09 |
| phe.Fasting_rs146622060 S13 | DIAPH1 | rs77798597 S7  | KPNA3     | 5.05E-16 | 2.06E-08    | 1.59E-12 | 2.30E-14 | 9.36E-07    | 1.79E-10 |
| phe.Fasting_rs146622060 S13 | DIAPH1 | rs78697063 S5  | MSI2      | 7.77E-20 | 3.17E-12    | 2.23E-14 | 1.49E-10 | 0.00608249  | 4.45E-07 |
| phe.Fasting_rs146622060 S13 | DIAPH1 | rs78736524 S5  | KPNA3     | 5.05E-16 | 2.06E-08    | 1.59E-12 | 2.49E-14 | 1.01E-06    | 1.89E-10 |
| phe.Fasting_rs146622060 S13 | DIAPH1 | rs79781495 S8  | KPNA3     | 5.05E-16 | 2.06E-08    | 1.59E-12 | 2.30E-14 | 9.36E-07    | 1.79E-10 |
| phe.Fasting_rs146622060 S13 | DIAPH1 | rs80332465 S5  | KPNA3     | 5.36E-16 | 2.19E-08    | 1.67E-12 | 2.47E-14 | 1.00E-06    | 1.88E-10 |

|                            |        |                |             |          |             |          |          |             |          |
|----------------------------|--------|----------------|-------------|----------|-------------|----------|----------|-------------|----------|
| phe.Fasting_rs146622060S13 | DIAPH1 | rs80334773 S5  | KPNA3       | 5.36E-16 | 2.19E-08    | 1.67E-12 | 2.47E-14 | 1.00E-06    | 1.88E-10 |
| phe.Fasting_rs146815317S5  | KPNA3  | rs57503635 S3  | NA          | 1.29E-15 | 5.25E-08    | 3.74E-12 | 4.33E-15 | 1.76E-07    | 4.03E-11 |
| phe.Fasting_rs146878162S7  | DIAPH1 | rs115787552S5  | KPNA3       | 2.97E-15 | 1.21E-07    | 8.14E-12 | 1.18E-13 | 4.80E-06    | 7.06E-10 |
| phe.Fasting_rs146878162S7  | DIAPH1 | rs115888477 S8 | NA          | 2.03E-14 | 8.28E-07    | 5.02E-11 | 2.21E-14 | 8.99E-07    | 1.73E-10 |
| phe.Fasting_rs146878162S7  | DIAPH1 | rs116011837S9  | BRD2        | 4.89E-11 | 0.00199774  | 6.62E-08 | 4.07E-14 | 1.66E-06    | 2.85E-10 |
| phe.Fasting_rs146878162S7  | DIAPH1 | rs116079984S8  | KPNA3       | 2.97E-15 | 1.21E-07    | 8.14E-12 | 1.24E-13 | 5.04E-06    | 7.34E-10 |
| phe.Fasting_rs146878162S7  | DIAPH1 | rs116120727 S9 | BRD2        | 4.89E-11 | 0.00199774  | 6.62E-08 | 4.07E-14 | 1.66E-06    | 2.85E-10 |
| phe.Fasting_rs146878162S7  | DIAPH1 | rs116548615 S8 | TMEM45B     | 1.73E-16 | 7.06E-09    | 6.15E-13 | 8.70E-12 | 0.000354153 | 3.26E-08 |
| phe.Fasting_rs146878162S7  | DIAPH1 | rs146815317S5  | KPNA3       | 2.97E-15 | 1.21E-07    | 8.14E-12 | 1.18E-13 | 4.80E-06    | 7.06E-10 |
| phe.Fasting_rs146878162S7  | DIAPH1 | rs150117838S8  | KPNA3       | 2.97E-15 | 1.21E-07    | 8.14E-12 | 1.09E-13 | 4.44E-06    | 6.79E-10 |
| phe.Fasting_rs146878162S7  | DIAPH1 | rs16894241 S4  | HIST1H2BK   | 1.99E-11 | 0.000812315 | 2.96E-08 | 3.44E-14 | 1.40E-06    | 2.50E-10 |
| phe.Fasting_rs146878162S7  | DIAPH1 | rs57503635 S3  | NA          | 6.34E-16 | 2.59E-08    | 1.95E-12 | 3.17E-14 | 1.29E-06    | 2.34E-10 |
| phe.Fasting_rs146878162S7  | DIAPH1 | rs7256517 S7   | CYTH2       | 1.04E-15 | 4.24E-08    | 3.06E-12 | 4.82E-12 | 0.000196022 | 1.91E-08 |
| phe.Fasting_rs146878162S7  | DIAPH1 | rs73392640 S8  | POLR3B      | 2.02E-10 | 0.00826001  | 2.49E-07 | 5.19E-11 | 0.00211214  | 1.67E-07 |
| phe.Fasting_rs146878162S7  | DIAPH1 | rs73619637 S8  | NA          | 1.44E-15 | 5.89E-08    | 4.14E-12 | 2.05E-10 | 0.00833668  | 5.78E-07 |
| phe.Fasting_rs146878162S7  | DIAPH1 | rs74914207 S24 | NA          | 1.37E-10 | 0.00558626  | 1.73E-07 | 9.12E-11 | 0.0037135   | 2.80E-07 |
| phe.Fasting_rs146878162S7  | DIAPH1 | rs75758702 S24 | NA          | 7.02E-17 | 2.87E-09    | 3.16E-13 | 1.57E-10 | 0.00638323  | 4.59E-07 |
| phe.Fasting_rs146878162S7  | DIAPH1 | rs7763107 S8   | FARS2       | 5.78E-16 | 2.36E-08    | 1.79E-12 | 9.23E-12 | 0.000375564 | 3.44E-08 |
| phe.Fasting_rs146878162S7  | DIAPH1 | rs77798597 S7  | KPNA3       | 2.97E-15 | 1.21E-07    | 8.14E-12 | 1.09E-13 | 4.44E-06    | 6.79E-10 |
| phe.Fasting_rs146878162S7  | DIAPH1 | rs78516788 S8  | SLC38A1     | 2.75E-11 | 0.00112269  | 3.94E-08 | 2.44E-10 | 0.00992686  | 6.74E-07 |
| phe.Fasting_rs146878162S7  | DIAPH1 | rs78736524 S5  | KPNA3       | 2.97E-15 | 1.21E-07    | 8.14E-12 | 1.18E-13 | 4.80E-06    | 7.06E-10 |
| phe.Fasting_rs146878162S7  | DIAPH1 | rs79781495 S8  | KPNA3       | 2.97E-15 | 1.21E-07    | 8.14E-12 | 1.09E-13 | 4.44E-06    | 6.79E-10 |
| phe.Fasting_rs146878162S7  | DIAPH1 | rs80332465 S5  | KPNA3       | 3.13E-15 | 1.28E-07    | 8.51E-12 | 1.17E-13 | 4.77E-06    | 7.06E-10 |
| phe.Fasting_rs146878162S7  | DIAPH1 | rs80334773 S5  | KPNA3       | 3.13E-15 | 1.28E-07    | 8.51E-12 | 1.17E-13 | 4.77E-06    | 7.06E-10 |
| phe.Fasting_rs1470889 S5   | ZC3H3  | rs139070959S8  | RPN2        | 1.38E-18 | 5.64E-11    | 3.38E-14 | 5.20E-15 | 2.12E-07    | 4.77E-11 |
| phe.Fasting_rs1470889 S5   | ZC3H3  | rs145412529S8  | "RBL1,RPS3A | 7.67E-19 | 3.13E-11    | 2.70E-14 | 6.02E-15 | 2.45E-07    | 5.46E-11 |
| phe.Fasting_rs1470890 S5   | ZC3H3  | rs139070959S8  | RPN2        | 1.38E-18 | 5.64E-11    | 3.38E-14 | 5.20E-15 | 2.12E-07    | 4.77E-11 |
| phe.Fasting_rs1470890 S5   | ZC3H3  | rs145412529S8  | "RBL1,RPS3A | 7.67E-19 | 3.13E-11    | 2.70E-14 | 6.02E-15 | 2.45E-07    | 5.46E-11 |
| phe.Fasting_rs147314451S8  | DIAPH1 | rs115787552S5  | KPNA3       | 2.97E-15 | 1.21E-07    | 8.14E-12 | 1.18E-13 | 4.80E-06    | 7.06E-10 |
| phe.Fasting_rs147314451S8  | DIAPH1 | rs115888477S8  | NA          | 2.03E-14 | 8.28E-07    | 5.02E-11 | 2.21E-14 | 8.99E-07    | 1.73E-10 |
| phe.Fasting_rs147314451S8  | DIAPH1 | rs116011837S9  | BRD2        | 4.89E-11 | 0.00199774  | 6.62E-08 | 4.07E-14 | 1.66E-06    | 2.85E-10 |
| phe.Fasting_rs147314451S8  | DIAPH1 | rs116079984S8  | KPNA3       | 2.97E-15 | 1.21E-07    | 8.14E-12 | 1.24E-13 | 5.04E-06    | 7.34E-10 |
| phe.Fasting_rs147314451S8  | DIAPH1 | rs116120727S9  | BRD2        | 4.89E-11 | 0.00199774  | 6.62E-08 | 4.07E-14 | 1.66E-06    | 2.85E-10 |
| phe.Fasting_rs147314451S8  | DIAPH1 | rs116548615 S8 | TMEM45B     | 1.73E-16 | 7.06E-09    | 6.15E-13 | 8.70E-12 | 0.000354153 | 3.26E-08 |
| phe.Fasting_rs147314451S8  | DIAPH1 | rs146815317 S5 | KPNA3       | 2.97E-15 | 1.21E-07    | 8.14E-12 | 1.18E-13 | 4.80E-06    | 7.06E-10 |
| phe.Fasting_rs147314451S8  | DIAPH1 | rs150117838S8  | KPNA3       | 2.97E-15 | 1.21E-07    | 8.14E-12 | 1.09E-13 | 4.44E-06    | 6.79E-10 |
| phe.Fasting_rs147314451S8  | DIAPH1 | rs16894241 S4  | HIST1H2BK   | 1.99E-11 | 0.000812315 | 2.96E-08 | 3.44E-14 | 1.40E-06    | 2.50E-10 |
| phe.Fasting_rs147314451S8  | DIAPH1 | rs57503635 S3  | NA          | 6.34E-16 | 2.59E-08    | 1.95E-12 | 3.17E-14 | 1.29E-06    | 2.34E-10 |
| phe.Fasting_rs147314451S8  | DIAPH1 | rs7256517 S7   | CYTH2       | 1.04E-15 | 4.24E-08    | 3.06E-12 | 4.82E-12 | 0.000196022 | 1.91E-08 |
| phe.Fasting_rs147314451S8  | DIAPH1 | rs73392640 S8  | POLR3B      | 2.02E-10 | 0.00826001  | 2.49E-07 | 5.19E-11 | 0.00211214  | 1.67E-07 |

|              |             |     |             |             |     |           |          |             |          |          |             |          |
|--------------|-------------|-----|-------------|-------------|-----|-----------|----------|-------------|----------|----------|-------------|----------|
| phe.Fasting_ | rs147314451 | S8  | DIAPH1      | rs73619637  | S8  | NA        | 1.44E-15 | 5.89E-08    | 4.14E-12 | 2.05E-10 | 0.00833668  | 5.78E-07 |
| phe.Fasting_ | rs147314451 | S8  | DIAPH1      | rs74914207  | S24 | NA        | 1.37E-10 | 0.00558626  | 1.73E-07 | 9.12E-11 | 0.0037135   | 2.80E-07 |
| phe.Fasting_ | rs147314451 | S8  | DIAPH1      | rs75758702  | S24 | NA        | 7.02E-17 | 2.87E-09    | 3.16E-13 | 1.57E-10 | 0.00638323  | 4.59E-07 |
| phe.Fasting_ | rs147314451 | S8  | DIAPH1      | rs7763107   | S8  | FARS2     | 5.78E-16 | 2.36E-08    | 1.79E-12 | 9.23E-12 | 0.000375564 | 3.44E-08 |
| phe.Fasting_ | rs147314451 | S8  | DIAPH1      | rs77798597  | S7  | KPNA3     | 2.97E-15 | 1.21E-07    | 8.14E-12 | 1.09E-13 | 4.44E-06    | 6.79E-10 |
| phe.Fasting_ | rs147314451 | S8  | DIAPH1      | rs78516788  | S8  | SLC38A1   | 2.75E-11 | 0.00112269  | 3.94E-08 | 2.44E-10 | 0.00992686  | 6.74E-07 |
| phe.Fasting_ | rs147314451 | S8  | DIAPH1      | rs78736524  | S5  | KPNA3     | 2.97E-15 | 1.21E-07    | 8.14E-12 | 1.18E-13 | 4.80E-06    | 7.06E-10 |
| phe.Fasting_ | rs147314451 | S8  | DIAPH1      | rs79781495  | S8  | KPNA3     | 2.97E-15 | 1.21E-07    | 8.14E-12 | 1.09E-13 | 4.44E-06    | 6.79E-10 |
| phe.Fasting_ | rs147314451 | S8  | DIAPH1      | rs80332465  | S5  | KPNA3     | 3.13E-15 | 1.28E-07    | 8.51E-12 | 1.17E-13 | 4.77E-06    | 7.06E-10 |
| phe.Fasting_ | rs147314451 | S8  | DIAPH1      | rs80334773  | S5  | KPNA3     | 3.13E-15 | 1.28E-07    | 8.51E-12 | 1.17E-13 | 4.77E-06    | 7.06E-10 |
| phe.Fasting_ | rs147417996 | S7  | DIAPH1      | rs112089881 | S8  | ZFAND4    | 3.24E-18 | 1.32E-10    | 5.45E-14 | 2.00E-10 | 0.0081353   | 5.68E-07 |
| phe.Fasting_ | rs147417996 | S7  | DIAPH1      | rs115787552 | S5  | KPNA3     | 5.05E-16 | 2.06E-08    | 1.59E-12 | 2.49E-14 | 1.01E-06    | 1.89E-10 |
| phe.Fasting_ | rs147417996 | S7  | DIAPH1      | rs115888477 | S8  | NA        | 3.68E-15 | 1.50E-07    | 9.90E-12 | 4.39E-15 | 1.79E-07    | 4.08E-11 |
| phe.Fasting_ | rs147417996 | S7  | DIAPH1      | rs116011837 | S9  | BRD2      | 9.60E-12 | 0.000392176 | 1.53E-08 | 9.42E-15 | 3.84E-07    | 8.18E-11 |
| phe.Fasting_ | rs147417996 | S7  | DIAPH1      | rs116079984 | S8  | KPNA3     | 5.05E-16 | 2.06E-08    | 1.59E-12 | 2.73E-14 | 1.11E-06    | 2.06E-10 |
| phe.Fasting_ | rs147417996 | S7  | DIAPH1      | rs116120727 | S9  | BRD2      | 9.60E-12 | 0.000392176 | 1.53E-08 | 9.42E-15 | 3.84E-07    | 8.18E-11 |
| phe.Fasting_ | rs147417996 | S7  | DIAPH1      | rs116548615 | S8  | TMEM45B   | 2.95E-17 | 1.21E-09    | 1.69E-13 | 1.84E-12 | 7.48E-05    | 8.04E-09 |
| phe.Fasting_ | rs147417996 | S7  | DIAPH1      | rs146815317 | S5  | KPNA3     | 5.05E-16 | 2.06E-08    | 1.59E-12 | 2.49E-14 | 1.01E-06    | 1.89E-10 |
| phe.Fasting_ | rs147417996 | S7  | DIAPH1      | rs150117838 | S8  | KPNA3     | 5.05E-16 | 2.06E-08    | 1.59E-12 | 2.30E-14 | 9.36E-07    | 1.79E-10 |
| phe.Fasting_ | rs147417996 | S7  | DIAPH1      | rs16894241  | S4  | HIST1H2BK | 3.73E-12 | 0.000152384 | 6.73E-09 | 7.18E-15 | 2.92E-07    | 6.39E-11 |
| phe.Fasting_ | rs147417996 | S7  | DIAPH1      | rs57503635  | S3  | NA        | 1.28E-16 | 5.23E-09    | 5.19E-13 | 7.18E-15 | 2.92E-07    | 6.39E-11 |
| phe.Fasting_ | rs147417996 | S7  | DIAPH1      | rs7256517   | S7  | CYTH2     | 1.59E-16 | 6.48E-09    | 6.03E-13 | 1.01E-12 | 4.13E-05    | 4.74E-09 |
| phe.Fasting_ | rs147417996 | S7  | DIAPH1      | rs73392640  | S8  | POLR3B    | 4.58E-11 | 0.00187102  | 6.24E-08 | 1.10E-11 | 0.000446024 | 4.04E-08 |
| phe.Fasting_ | rs147417996 | S7  | DIAPH1      | rs74914207  | S24 | NA        | 2.89E-11 | 0.00117833  | 4.13E-08 | 1.71E-11 | 0.000696754 | 6.13E-08 |
| phe.Fasting_ | rs147417996 | S7  | DIAPH1      | rs75758702  | S24 | NA        | 1.04E-17 | 4.25E-10    | 9.89E-14 | 2.90E-11 | 0.00117848  | 9.92E-08 |
| phe.Fasting_ | rs147417996 | S7  | DIAPH1      | rs7763107   | S8  | FARS2     | 9.44E-17 | 3.86E-09    | 4.06E-13 | 1.67E-12 | 6.82E-05    | 7.43E-09 |
| phe.Fasting_ | rs147417996 | S7  | DIAPH1      | rs77798597  | S7  | KPNA3     | 5.05E-16 | 2.06E-08    | 1.59E-12 | 2.30E-14 | 9.36E-07    | 1.79E-10 |
| phe.Fasting_ | rs147417996 | S7  | DIAPH1      | rs78697063  | S5  | MSI2      | 7.77E-20 | 3.17E-12    | 2.23E-14 | 1.49E-10 | 0.00608249  | 4.45E-07 |
| phe.Fasting_ | rs147417996 | S7  | DIAPH1      | rs78736524  | S5  | KPNA3     | 5.05E-16 | 2.06E-08    | 1.59E-12 | 2.49E-14 | 1.01E-06    | 1.89E-10 |
| phe.Fasting_ | rs147417996 | S7  | DIAPH1      | rs79781495  | S8  | KPNA3     | 5.05E-16 | 2.06E-08    | 1.59E-12 | 2.30E-14 | 9.36E-07    | 1.79E-10 |
| phe.Fasting_ | rs147417996 | S7  | DIAPH1      | rs80332465  | S5  | KPNA3     | 5.36E-16 | 2.19E-08    | 1.67E-12 | 2.47E-14 | 1.00E-06    | 1.88E-10 |
| phe.Fasting_ | rs147417996 | S7  | DIAPH1      | rs80334773  | S5  | KPNA3     | 5.36E-16 | 2.19E-08    | 1.67E-12 | 2.47E-14 | 1.00E-06    | 1.88E-10 |
| phe.Fasting_ | rs147506725 | S21 | "PCDHGA1,Pr | rs115787552 | S5  | KPNA3     | 3.78E-16 | 1.54E-08    | 1.23E-12 | 4.20E-14 | 1.71E-06    | 2.93E-10 |
| phe.Fasting_ | rs147506725 | S21 | "PCDHGA1,Pr | rs115888477 | S8  | NA        | 2.72E-15 | 1.11E-07    | 7.62E-12 | 7.36E-15 | 3.00E-07    | 6.53E-11 |
| phe.Fasting_ | rs147506725 | S21 | "PCDHGA1,Pr | rs116079984 | S8  | KPNA3     | 3.78E-16 | 1.54E-08    | 1.23E-12 | 4.48E-14 | 1.82E-06    | 3.11E-10 |
| phe.Fasting_ | rs147506725 | S21 | "PCDHGA1,Pr | rs116548615 | S8  | TMEM45B   | 2.04E-17 | 8.34E-10    | 1.43E-13 | 7.86E-12 | 0.000320069 | 2.98E-08 |
| phe.Fasting_ | rs147506725 | S21 | "PCDHGA1,Pr | rs146815317 | S5  | KPNA3     | 3.78E-16 | 1.54E-08    | 1.23E-12 | 4.20E-14 | 1.71E-06    | 2.93E-10 |
| phe.Fasting_ | rs147506725 | S21 | "PCDHGA1,Pr | rs150117838 | S8  | KPNA3     | 3.78E-16 | 1.54E-08    | 1.23E-12 | 3.89E-14 | 1.58E-06    | 2.77E-10 |
| phe.Fasting_ | rs147506725 | S21 | "PCDHGA1,Pr | rs77798597  | S7  | KPNA3     | 3.78E-16 | 1.54E-08    | 1.23E-12 | 3.89E-14 | 1.58E-06    | 2.77E-10 |
| phe.Fasting_ | rs147506725 | S21 | "PCDHGA1,Pr | rs78736524  | S5  | KPNA3     | 3.78E-16 | 1.54E-08    | 1.23E-12 | 4.20E-14 | 1.71E-06    | 2.93E-10 |



|                             |                           |           |          |             |          |          |             |          |
|-----------------------------|---------------------------|-----------|----------|-------------|----------|----------|-------------|----------|
| phe.Fasting_rs147506725 S21 | "PCDHGA1,Prs79781495 S8   | KPNA3     | 3.78E-16 | 1.54E-08    | 1.23E-12 | 3.89E-14 | 1.58E-06    | 2.77E-10 |
| phe.Fasting_rs147506725 S21 | "PCDHGA1,Prs80332465 S5   | KPNA3     | 4.04E-16 | 1.65E-08    | 1.31E-12 | 4.20E-14 | 1.71E-06    | 2.93E-10 |
| phe.Fasting_rs147506725 S21 | "PCDHGA1,Prs80334773 S5   | KPNA3     | 4.04E-16 | 1.65E-08    | 1.31E-12 | 4.20E-14 | 1.71E-06    | 2.93E-10 |
| phe.Fasting_rs147646948 S7  | "LOC100505(rs115787552 S5 | KPNA3     | 2.97E-15 | 1.21E-07    | 8.14E-12 | 1.18E-13 | 4.80E-06    | 7.06E-10 |
| phe.Fasting_rs147646948 S7  | "LOC100505(rs115888477 S8 | NA        | 2.03E-14 | 8.28E-07    | 5.02E-11 | 2.21E-14 | 8.99E-07    | 1.73E-10 |
| phe.Fasting_rs147646948 S7  | "LOC100505(rs116011837 S9 | BRD2      | 4.89E-11 | 0.00199774  | 6.62E-08 | 4.07E-14 | 1.66E-06    | 2.85E-10 |
| phe.Fasting_rs147646948 S7  | "LOC100505(rs116079984 S8 | KPNA3     | 2.97E-15 | 1.21E-07    | 8.14E-12 | 1.24E-13 | 5.04E-06    | 7.34E-10 |
| phe.Fasting_rs147646948 S7  | "LOC100505(rs116120727 S9 | BRD2      | 4.89E-11 | 0.00199774  | 6.62E-08 | 4.07E-14 | 1.66E-06    | 2.85E-10 |
| phe.Fasting_rs147646948 S7  | "LOC100505(rs116548615 S8 | TMEM45B   | 1.73E-16 | 7.06E-09    | 6.15E-13 | 8.70E-12 | 0.000354153 | 3.26E-08 |
| phe.Fasting_rs147646948 S7  | "LOC100505(rs146815317 S5 | KPNA3     | 2.97E-15 | 1.21E-07    | 8.14E-12 | 1.18E-13 | 4.80E-06    | 7.06E-10 |
| phe.Fasting_rs147646948 S7  | "LOC100505(rs150117838 S8 | KPNA3     | 2.97E-15 | 1.21E-07    | 8.14E-12 | 1.09E-13 | 4.44E-06    | 6.79E-10 |
| phe.Fasting_rs147646948 S7  | "LOC100505(rs16894241 S4  | HIST1H2BK | 1.99E-11 | 0.000812315 | 2.96E-08 | 3.44E-14 | 1.40E-06    | 2.50E-10 |
| phe.Fasting_rs147646948 S7  | "LOC100505(rs57503635 S3  | NA        | 6.34E-16 | 2.59E-08    | 1.95E-12 | 3.17E-14 | 1.29E-06    | 2.34E-10 |
| phe.Fasting_rs147646948 S7  | "LOC100505(rs7256517 S7   | CYTH2     | 1.04E-15 | 4.24E-08    | 3.06E-12 | 4.82E-12 | 0.000196022 | 1.91E-08 |
| phe.Fasting_rs147646948 S7  | "LOC100505(rs73392640 S8  | POLR3B    | 2.02E-10 | 0.00826001  | 2.49E-07 | 5.19E-11 | 0.00211214  | 1.67E-07 |
| phe.Fasting_rs147646948 S7  | "LOC100505(rs73619637 S8  | NA        | 1.44E-15 | 5.89E-08    | 4.14E-12 | 2.05E-10 | 0.00833668  | 5.78E-07 |
| phe.Fasting_rs147646948 S7  | "LOC100505(rs74914207 S24 | NA        | 1.37E-10 | 0.00558626  | 1.73E-07 | 9.12E-11 | 0.0037135   | 2.80E-07 |
| phe.Fasting_rs147646948 S7  | "LOC100505(rs75758702 S24 | NA        | 7.02E-17 | 2.87E-09    | 3.16E-13 | 1.57E-10 | 0.00638323  | 4.59E-07 |
| phe.Fasting_rs147646948 S7  | "LOC100505(rs7763107 S8   | FARS2     | 5.78E-16 | 2.36E-08    | 1.79E-12 | 9.23E-12 | 0.000375564 | 3.44E-08 |
| phe.Fasting_rs147646948 S7  | "LOC100505(rs77798597 S7  | KPNA3     | 2.97E-15 | 1.21E-07    | 8.14E-12 | 1.09E-13 | 4.44E-06    | 6.79E-10 |
| phe.Fasting_rs147646948 S7  | "LOC100505(rs78516788 S8  | SLC38A1   | 2.75E-11 | 0.00112269  | 3.94E-08 | 2.44E-10 | 0.00992686  | 6.74E-07 |
| phe.Fasting_rs147646948 S7  | "LOC100505(rs78736524 S5  | KPNA3     | 2.97E-15 | 1.21E-07    | 8.14E-12 | 1.18E-13 | 4.80E-06    | 7.06E-10 |
| phe.Fasting_rs147646948 S7  | "LOC100505(rs79781495 S8  | KPNA3     | 2.97E-15 | 1.21E-07    | 8.14E-12 | 1.09E-13 | 4.44E-06    | 6.79E-10 |
| phe.Fasting_rs147646948 S7  | "LOC100505(rs80332465 S5  | KPNA3     | 3.13E-15 | 1.28E-07    | 8.51E-12 | 1.17E-13 | 4.77E-06    | 7.06E-10 |
| phe.Fasting_rs147646948 S7  | "LOC100505(rs80334773 S5  | KPNA3     | 3.13E-15 | 1.28E-07    | 8.51E-12 | 1.17E-13 | 4.77E-06    | 7.06E-10 |
| phe.Fasting_rs147677041 S8  | DIAPH1 rs112089881 S8     | ZFAND4    | 3.24E-18 | 1.32E-10    | 5.45E-14 | 1.95E-10 | 0.00795558  | 5.56E-07 |
| phe.Fasting_rs147677041 S8  | DIAPH1 rs115787552 S5     | KPNA3     | 5.05E-16 | 2.06E-08    | 1.59E-12 | 2.34E-14 | 9.53E-07    | 1.79E-10 |
| phe.Fasting_rs147677041 S8  | DIAPH1 rs115888477 S8     | NA        | 3.68E-15 | 1.50E-07    | 9.90E-12 | 4.11E-15 | 1.67E-07    | 3.84E-11 |
| phe.Fasting_rs147677041 S8  | DIAPH1 rs116011837 S9     | BRD2      | 9.60E-12 | 0.000392176 | 1.53E-08 | 9.05E-15 | 3.68E-07    | 7.90E-11 |
| phe.Fasting_rs147677041 S8  | DIAPH1 rs116079984 S8     | KPNA3     | 5.05E-16 | 2.06E-08    | 1.59E-12 | 2.56E-14 | 1.04E-06    | 1.94E-10 |
| phe.Fasting_rs147677041 S8  | DIAPH1 rs116120727 S9     | BRD2      | 9.60E-12 | 0.000392176 | 1.53E-08 | 9.05E-15 | 3.68E-07    | 7.90E-11 |
| phe.Fasting_rs147677041 S8  | DIAPH1 rs116548615 S8     | TMEM45B   | 2.95E-17 | 1.21E-09    | 1.69E-13 | 1.76E-12 | 7.17E-05    | 7.72E-09 |
| phe.Fasting_rs147677041 S8  | DIAPH1 rs146815317 S5     | KPNA3     | 5.05E-16 | 2.06E-08    | 1.59E-12 | 2.34E-14 | 9.53E-07    | 1.79E-10 |
| phe.Fasting_rs147677041 S8  | DIAPH1 rs150117838 S8     | KPNA3     | 5.05E-16 | 2.06E-08    | 1.59E-12 | 2.16E-14 | 8.80E-07    | 1.71E-10 |
| phe.Fasting_rs147677041 S8  | DIAPH1 rs16894241 S4      | HIST1H2BK | 3.73E-12 | 0.000152384 | 6.73E-09 | 6.62E-15 | 2.69E-07    | 5.94E-11 |
| phe.Fasting_rs147677041 S8  | DIAPH1 rs57503635 S3      | NA        | 1.28E-16 | 5.23E-09    | 5.19E-13 | 6.61E-15 | 2.69E-07    | 5.94E-11 |
| phe.Fasting_rs147677041 S8  | DIAPH1 rs7256517 S7       | CYTH2     | 1.59E-16 | 6.48E-09    | 6.03E-13 | 9.69E-13 | 3.95E-05    | 4.59E-09 |
| phe.Fasting_rs147677041 S8  | DIAPH1 rs73392640 S8      | POLR3B    | 4.58E-11 | 0.00187102  | 6.24E-08 | 6.82E-12 | 0.000277641 | 2.62E-08 |
| phe.Fasting_rs147677041 S8  | DIAPH1 rs74914207 S24     | NA        | 2.89E-11 | 0.00117833  | 4.13E-08 | 1.56E-11 | 0.000634366 | 5.60E-08 |
| phe.Fasting_rs147677041 S8  | DIAPH1 rs75758702 S24     | NA        | 1.04E-17 | 4.25E-10    | 9.89E-14 | 2.85E-11 | 0.00115844  | 9.77E-08 |

|                           |        |             |     |           |          |             |          |          |             |          |
|---------------------------|--------|-------------|-----|-----------|----------|-------------|----------|----------|-------------|----------|
| phe.Fasting_rs147677041S8 | DIAPH1 | rs7763107   | S8  | FARS2     | 9.44E-17 | 3.86E-09    | 4.06E-13 | 1.60E-12 | 6.52E-05    | 7.13E-09 |
| phe.Fasting_rs147677041S8 | DIAPH1 | rs77798597  | S7  | KPNA3     | 5.05E-16 | 2.06E-08    | 1.59E-12 | 2.16E-14 | 8.80E-07    | 1.71E-10 |
| phe.Fasting_rs147677041S8 | DIAPH1 | rs78697063  | S5  | MSI2      | 7.77E-20 | 3.17E-12    | 2.23E-14 | 1.45E-10 | 0.00591847  | 4.35E-07 |
| phe.Fasting_rs147677041S8 | DIAPH1 | rs78736524  | S5  | KPNA3     | 5.05E-16 | 2.06E-08    | 1.59E-12 | 2.34E-14 | 9.53E-07    | 1.79E-10 |
| phe.Fasting_rs147677041S8 | DIAPH1 | rs79781495  | S8  | KPNA3     | 5.05E-16 | 2.06E-08    | 1.59E-12 | 2.16E-14 | 8.80E-07    | 1.71E-10 |
| phe.Fasting_rs147677041S8 | DIAPH1 | rs80332465  | S5  | KPNA3     | 5.36E-16 | 2.19E-08    | 1.67E-12 | 2.32E-14 | 9.45E-07    | 1.79E-10 |
| phe.Fasting_rs147677041S8 | DIAPH1 | rs80334773  | S5  | KPNA3     | 5.36E-16 | 2.19E-08    | 1.67E-12 | 2.32E-14 | 9.45E-07    | 1.79E-10 |
| phe.Fasting_rs148116628S7 | DIAPH1 | rs115787552 | S5  | KPNA3     | 2.97E-15 | 1.21E-07    | 8.14E-12 | 1.18E-13 | 4.80E-06    | 7.06E-10 |
| phe.Fasting_rs148116628S7 | DIAPH1 | rs115888477 | S8  | NA        | 2.03E-14 | 8.28E-07    | 5.02E-11 | 2.21E-14 | 8.99E-07    | 1.73E-10 |
| phe.Fasting_rs148116628S7 | DIAPH1 | rs116011837 | S9  | BRD2      | 4.89E-11 | 0.00199774  | 6.62E-08 | 4.07E-14 | 1.66E-06    | 2.85E-10 |
| phe.Fasting_rs148116628S7 | DIAPH1 | rs116079984 | S8  | KPNA3     | 2.97E-15 | 1.21E-07    | 8.14E-12 | 1.24E-13 | 5.04E-06    | 7.34E-10 |
| phe.Fasting_rs148116628S7 | DIAPH1 | rs116120727 | S9  | BRD2      | 4.89E-11 | 0.00199774  | 6.62E-08 | 4.07E-14 | 1.66E-06    | 2.85E-10 |
| phe.Fasting_rs148116628S7 | DIAPH1 | rs116548615 | S8  | TMEM45B   | 1.73E-16 | 7.06E-09    | 6.15E-13 | 8.70E-12 | 0.000354153 | 3.26E-08 |
| phe.Fasting_rs148116628S7 | DIAPH1 | rs146815317 | S5  | KPNA3     | 2.97E-15 | 1.21E-07    | 8.14E-12 | 1.18E-13 | 4.80E-06    | 7.06E-10 |
| phe.Fasting_rs148116628S7 | DIAPH1 | rs150117838 | S8  | KPNA3     | 2.97E-15 | 1.21E-07    | 8.14E-12 | 1.09E-13 | 4.44E-06    | 6.79E-10 |
| phe.Fasting_rs148116628S7 | DIAPH1 | rs16894241  | S4  | HIST1H2BK | 1.99E-11 | 0.000812315 | 2.96E-08 | 3.44E-14 | 1.40E-06    | 2.50E-10 |
| phe.Fasting_rs148116628S7 | DIAPH1 | rs57503635  | S3  | NA        | 6.34E-16 | 2.59E-08    | 1.95E-12 | 3.17E-14 | 1.29E-06    | 2.34E-10 |
| phe.Fasting_rs148116628S7 | DIAPH1 | rs7256517   | S7  | CYTH2     | 1.04E-15 | 4.24E-08    | 3.06E-12 | 4.82E-12 | 0.000196022 | 1.91E-08 |
| phe.Fasting_rs148116628S7 | DIAPH1 | rs73392640  | S8  | POLR3B    | 2.02E-10 | 0.00826001  | 2.49E-07 | 5.19E-11 | 0.00211214  | 1.67E-07 |
| phe.Fasting_rs148116628S7 | DIAPH1 | rs73619637  | S8  | NA        | 1.44E-15 | 5.89E-08    | 4.14E-12 | 2.05E-10 | 0.00833668  | 5.78E-07 |
| phe.Fasting_rs148116628S7 | DIAPH1 | rs74914207  | S24 | NA        | 1.37E-10 | 0.00558626  | 1.73E-07 | 9.12E-11 | 0.0037135   | 2.80E-07 |
| phe.Fasting_rs148116628S7 | DIAPH1 | rs75758702  | S24 | NA        | 7.02E-17 | 2.87E-09    | 3.16E-13 | 1.57E-10 | 0.00638323  | 4.59E-07 |
| phe.Fasting_rs148116628S7 | DIAPH1 | rs7763107   | S8  | FARS2     | 5.78E-16 | 2.36E-08    | 1.79E-12 | 9.23E-12 | 0.000375564 | 3.44E-08 |
| phe.Fasting_rs148116628S7 | DIAPH1 | rs77798597  | S7  | KPNA3     | 2.97E-15 | 1.21E-07    | 8.14E-12 | 1.09E-13 | 4.44E-06    | 6.79E-10 |
| phe.Fasting_rs148116628S7 | DIAPH1 | rs78516788  | S8  | SLC38A1   | 2.75E-11 | 0.00112269  | 3.94E-08 | 2.44E-10 | 0.00992686  | 6.74E-07 |
| phe.Fasting_rs148116628S7 | DIAPH1 | rs78736524  | S5  | KPNA3     | 2.97E-15 | 1.21E-07    | 8.14E-12 | 1.18E-13 | 4.80E-06    | 7.06E-10 |
| phe.Fasting_rs148116628S7 | DIAPH1 | rs79781495  | S8  | KPNA3     | 2.97E-15 | 1.21E-07    | 8.14E-12 | 1.09E-13 | 4.44E-06    | 6.79E-10 |
| phe.Fasting_rs148116628S7 | DIAPH1 | rs80332465  | S5  | KPNA3     | 3.13E-15 | 1.28E-07    | 8.51E-12 | 1.17E-13 | 4.77E-06    | 7.06E-10 |
| phe.Fasting_rs148116628S7 | DIAPH1 | rs80334773  | S5  | KPNA3     | 3.13E-15 | 1.28E-07    | 8.51E-12 | 1.17E-13 | 4.77E-06    | 7.06E-10 |
| phe.Fasting_rs148423011S7 | DIAPH1 | rs115787552 | S5  | KPNA3     | 2.97E-15 | 1.21E-07    | 8.14E-12 | 1.18E-13 | 4.80E-06    | 7.06E-10 |
| phe.Fasting_rs148423011S7 | DIAPH1 | rs115888477 | S8  | NA        | 2.03E-14 | 8.28E-07    | 5.02E-11 | 2.21E-14 | 8.99E-07    | 1.73E-10 |
| phe.Fasting_rs148423011S7 | DIAPH1 | rs116011837 | S9  | BRD2      | 4.89E-11 | 0.00199774  | 6.62E-08 | 4.07E-14 | 1.66E-06    | 2.85E-10 |
| phe.Fasting_rs148423011S7 | DIAPH1 | rs116079984 | S8  | KPNA3     | 2.97E-15 | 1.21E-07    | 8.14E-12 | 1.24E-13 | 5.04E-06    | 7.34E-10 |
| phe.Fasting_rs148423011S7 | DIAPH1 | rs116120727 | S9  | BRD2      | 4.89E-11 | 0.00199774  | 6.62E-08 | 4.07E-14 | 1.66E-06    | 2.85E-10 |
| phe.Fasting_rs148423011S7 | DIAPH1 | rs116548615 | S8  | TMEM45B   | 1.73E-16 | 7.06E-09    | 6.15E-13 | 8.70E-12 | 0.000354153 | 3.26E-08 |
| phe.Fasting_rs148423011S7 | DIAPH1 | rs146815317 | S5  | KPNA3     | 2.97E-15 | 1.21E-07    | 8.14E-12 | 1.18E-13 | 4.80E-06    | 7.06E-10 |
| phe.Fasting_rs148423011S7 | DIAPH1 | rs150117838 | S8  | KPNA3     | 2.97E-15 | 1.21E-07    | 8.14E-12 | 1.09E-13 | 4.44E-06    | 6.79E-10 |
| phe.Fasting_rs148423011S7 | DIAPH1 | rs16894241  | S4  | HIST1H2BK | 1.99E-11 | 0.000812315 | 2.96E-08 | 3.44E-14 | 1.40E-06    | 2.50E-10 |
| phe.Fasting_rs148423011S7 | DIAPH1 | rs57503635  | S3  | NA        | 6.34E-16 | 2.59E-08    | 1.95E-12 | 3.17E-14 | 1.29E-06    | 2.34E-10 |
| phe.Fasting_rs148423011S7 | DIAPH1 | rs7256517   | S7  | CYTH2     | 1.04E-15 | 4.24E-08    | 3.06E-12 | 4.82E-12 | 0.000196022 | 1.91E-08 |

|                           |        |             |     |           |          |             |          |          |             |          |
|---------------------------|--------|-------------|-----|-----------|----------|-------------|----------|----------|-------------|----------|
| phe.Fasting_rs148423011S7 | DIAPH1 | rs73392640  | S8  | POLR3B    | 2.02E-10 | 0.00826001  | 2.49E-07 | 5.19E-11 | 0.00211214  | 1.67E-07 |
| phe.Fasting_rs148423011S7 | DIAPH1 | rs73619637  | S8  | NA        | 1.44E-15 | 5.89E-08    | 4.14E-12 | 2.05E-10 | 0.00833668  | 5.78E-07 |
| phe.Fasting_rs148423011S7 | DIAPH1 | rs74914207  | S24 | NA        | 1.37E-10 | 0.00558626  | 1.73E-07 | 9.12E-11 | 0.0037135   | 2.80E-07 |
| phe.Fasting_rs148423011S7 | DIAPH1 | rs75758702  | S24 | NA        | 7.02E-17 | 2.87E-09    | 3.16E-13 | 1.57E-10 | 0.00638323  | 4.59E-07 |
| phe.Fasting_rs148423011S7 | DIAPH1 | rs7763107   | S8  | FARS2     | 5.78E-16 | 2.36E-08    | 1.79E-12 | 9.23E-12 | 0.000375564 | 3.44E-08 |
| phe.Fasting_rs148423011S7 | DIAPH1 | rs77798597  | S7  | KPNA3     | 2.97E-15 | 1.21E-07    | 8.14E-12 | 1.09E-13 | 4.44E-06    | 6.79E-10 |
| phe.Fasting_rs148423011S7 | DIAPH1 | rs78516788  | S8  | SLC38A1   | 2.75E-11 | 0.00112269  | 3.94E-08 | 2.44E-10 | 0.00992686  | 6.74E-07 |
| phe.Fasting_rs148423011S7 | DIAPH1 | rs78736524  | S5  | KPNA3     | 2.97E-15 | 1.21E-07    | 8.14E-12 | 1.18E-13 | 4.80E-06    | 7.06E-10 |
| phe.Fasting_rs148423011S7 | DIAPH1 | rs79781495  | S8  | KPNA3     | 2.97E-15 | 1.21E-07    | 8.14E-12 | 1.09E-13 | 4.44E-06    | 6.79E-10 |
| phe.Fasting_rs148423011S7 | DIAPH1 | rs80332465  | S5  | KPNA3     | 3.13E-15 | 1.28E-07    | 8.51E-12 | 1.17E-13 | 4.77E-06    | 7.06E-10 |
| phe.Fasting_rs148423011S7 | DIAPH1 | rs80334773  | S5  | KPNA3     | 3.13E-15 | 1.28E-07    | 8.51E-12 | 1.17E-13 | 4.77E-06    | 7.06E-10 |
| phe.Fasting_rs149019627S8 | DIAPH1 | rs112089881 | S8  | ZFAND4    | 3.24E-18 | 1.32E-10    | 5.45E-14 | 1.95E-10 | 0.00795558  | 5.56E-07 |
| phe.Fasting_rs149019627S8 | DIAPH1 | rs115787552 | S5  | KPNA3     | 5.05E-16 | 2.06E-08    | 1.59E-12 | 2.34E-14 | 9.53E-07    | 1.79E-10 |
| phe.Fasting_rs149019627S8 | DIAPH1 | rs115888477 | S8  | NA        | 3.68E-15 | 1.50E-07    | 9.90E-12 | 4.11E-15 | 1.67E-07    | 3.84E-11 |
| phe.Fasting_rs149019627S8 | DIAPH1 | rs116011837 | S9  | BRD2      | 9.60E-12 | 0.000392176 | 1.53E-08 | 9.05E-15 | 3.68E-07    | 7.90E-11 |
| phe.Fasting_rs149019627S8 | DIAPH1 | rs116079984 | S8  | KPNA3     | 5.05E-16 | 2.06E-08    | 1.59E-12 | 2.56E-14 | 1.04E-06    | 1.94E-10 |
| phe.Fasting_rs149019627S8 | DIAPH1 | rs116120727 | S9  | BRD2      | 9.60E-12 | 0.000392176 | 1.53E-08 | 9.05E-15 | 3.68E-07    | 7.90E-11 |
| phe.Fasting_rs149019627S8 | DIAPH1 | rs116548615 | S8  | TMEM45B   | 2.95E-17 | 1.21E-09    | 1.69E-13 | 1.76E-12 | 7.17E-05    | 7.72E-09 |
| phe.Fasting_rs149019627S8 | DIAPH1 | rs146815317 | S5  | KPNA3     | 5.05E-16 | 2.06E-08    | 1.59E-12 | 2.34E-14 | 9.53E-07    | 1.79E-10 |
| phe.Fasting_rs149019627S8 | DIAPH1 | rs150117838 | S8  | KPNA3     | 5.05E-16 | 2.06E-08    | 1.59E-12 | 2.16E-14 | 8.80E-07    | 1.71E-10 |
| phe.Fasting_rs149019627S8 | DIAPH1 | rs16894241  | S4  | HIST1H2BK | 3.73E-12 | 0.000152384 | 6.73E-09 | 1.62E-15 | 2.69E-07    | 5.94E-11 |
| phe.Fasting_rs149019627S8 | DIAPH1 | rs57503635  | S3  | NA        | 1.28E-16 | 5.23E-09    | 5.19E-13 | 6.61E-15 | 2.69E-07    | 5.94E-11 |
| phe.Fasting_rs149019627S8 | DIAPH1 | rs7256517   | S7  | CYTH2     | 1.59E-16 | 6.48E-09    | 6.03E-13 | 9.69E-13 | 3.95E-05    | 4.59E-09 |
| phe.Fasting_rs149019627S8 | DIAPH1 | rs73392640  | S8  | POLR3B    | 4.58E-11 | 0.00187102  | 6.24E-08 | 6.82E-12 | 0.000277641 | 2.62E-08 |
| phe.Fasting_rs149019627S8 | DIAPH1 | rs74914207  | S24 | NA        | 2.89E-11 | 0.00117833  | 4.13E-08 | 1.56E-11 | 0.000634366 | 5.60E-08 |
| phe.Fasting_rs149019627S8 | DIAPH1 | rs75758702  | S24 | NA        | 1.04E-17 | 4.25E-10    | 9.89E-14 | 2.85E-11 | 0.00115844  | 9.77E-08 |
| phe.Fasting_rs149019627S8 | DIAPH1 | rs7763107   | S8  | FARS2     | 9.44E-17 | 3.86E-09    | 4.06E-13 | 1.60E-12 | 6.52E-05    | 7.13E-09 |
| phe.Fasting_rs149019627S8 | DIAPH1 | rs77798597  | S7  | KPNA3     | 5.05E-16 | 2.06E-08    | 1.59E-12 | 2.16E-14 | 8.80E-07    | 1.71E-10 |
| phe.Fasting_rs149019627S8 | DIAPH1 | rs78697063  | S5  | MSI2      | 7.77E-20 | 3.17E-12    | 2.23E-14 | 1.45E-10 | 0.00591847  | 4.35E-07 |
| phe.Fasting_rs149019627S8 | DIAPH1 | rs78736524  | S5  | KPNA3     | 5.05E-16 | 2.06E-08    | 1.59E-12 | 2.34E-14 | 9.53E-07    | 1.79E-10 |
| phe.Fasting_rs149019627S8 | DIAPH1 | rs79781495  | S8  | KPNA3     | 5.05E-16 | 2.06E-08    | 1.59E-12 | 2.16E-14 | 8.80E-07    | 1.71E-10 |
| phe.Fasting_rs149019627S8 | DIAPH1 | rs80332465  | S5  | KPNA3     | 5.36E-16 | 2.19E-08    | 1.67E-12 | 2.32E-14 | 9.45E-07    | 1.79E-10 |
| phe.Fasting_rs149019627S8 | DIAPH1 | rs80334773  | S5  | KPNA3     | 5.36E-16 | 2.19E-08    | 1.67E-12 | 2.32E-14 | 9.45E-07    | 1.79E-10 |
| phe.Fasting_rs149075406S8 | DIAPH1 | rs115787552 | S5  | KPNA3     | 2.97E-15 | 1.21E-07    | 8.14E-12 | 1.18E-13 | 4.80E-06    | 7.06E-10 |
| phe.Fasting_rs149075406S8 | DIAPH1 | rs115888477 | S8  | NA        | 2.03E-14 | 8.28E-07    | 5.02E-11 | 2.21E-14 | 8.99E-07    | 1.73E-10 |
| phe.Fasting_rs149075406S8 | DIAPH1 | rs116011837 | S9  | BRD2      | 4.89E-11 | 0.00199774  | 6.62E-08 | 4.07E-14 | 1.66E-06    | 2.85E-10 |
| phe.Fasting_rs149075406S8 | DIAPH1 | rs116079984 | S8  | KPNA3     | 2.97E-15 | 1.21E-07    | 8.14E-12 | 1.24E-13 | 5.04E-06    | 7.34E-10 |
| phe.Fasting_rs149075406S8 | DIAPH1 | rs116120727 | S9  | BRD2      | 4.89E-11 | 0.00199774  | 6.62E-08 | 4.07E-14 | 1.66E-06    | 2.85E-10 |
| phe.Fasting_rs149075406S8 | DIAPH1 | rs116548615 | S8  | TMEM45B   | 1.73E-16 | 7.06E-09    | 6.15E-13 | 8.70E-12 | 0.000354153 | 3.26E-08 |
| phe.Fasting_rs149075406S8 | DIAPH1 | rs146815317 | S5  | KPNA3     | 2.97E-15 | 1.21E-07    | 8.14E-12 | 1.18E-13 | 4.80E-06    | 7.06E-10 |

|                              |            |                |           |          |             |          |          |             |          |
|------------------------------|------------|----------------|-----------|----------|-------------|----------|----------|-------------|----------|
| phe.Fasting_ rs149075406 S8  | DIAPH1     | rs150117838 S8 | KPNA3     | 2.97E-15 | 1.21E-07    | 8.14E-12 | 1.09E-13 | 4.44E-06    | 6.79E-10 |
| phe.Fasting_ rs149075406 S8  | DIAPH1     | rs16894241 S4  | HIST1H2BK | 1.99E-11 | 0.000812315 | 2.96E-08 | 3.44E-14 | 1.40E-06    | 2.50E-10 |
| phe.Fasting_ rs149075406 S8  | DIAPH1     | rs57503635 S3  | NA        | 6.34E-16 | 2.59E-08    | 1.95E-12 | 3.17E-14 | 1.29E-06    | 2.34E-10 |
| phe.Fasting_ rs149075406 S8  | DIAPH1     | rs7256517 S7   | CYTH2     | 1.04E-15 | 4.24E-08    | 3.06E-12 | 4.82E-12 | 0.000196022 | 1.91E-08 |
| phe.Fasting_ rs149075406 S8  | DIAPH1     | rs73392640 S8  | POLR3B    | 2.02E-10 | 0.00826001  | 2.49E-07 | 5.19E-11 | 0.00211214  | 1.67E-07 |
| phe.Fasting_ rs149075406 S8  | DIAPH1     | rs73619637 S8  | NA        | 1.44E-15 | 5.89E-08    | 4.14E-12 | 2.05E-10 | 0.00833668  | 5.78E-07 |
| phe.Fasting_ rs149075406 S8  | DIAPH1     | rs74914207 S24 | NA        | 1.37E-10 | 0.00558626  | 1.73E-07 | 9.12E-11 | 0.0037135   | 2.80E-07 |
| phe.Fasting_ rs149075406 S8  | DIAPH1     | rs75758702 S24 | NA        | 7.02E-17 | 2.87E-09    | 3.16E-13 | 1.57E-10 | 0.00638323  | 4.59E-07 |
| phe.Fasting_ rs149075406 S8  | DIAPH1     | rs7763107 S8   | FARS2     | 5.78E-16 | 2.36E-08    | 1.79E-12 | 9.23E-12 | 0.000375564 | 3.44E-08 |
| phe.Fasting_ rs149075406 S8  | DIAPH1     | rs77798597 S7  | KPNA3     | 2.97E-15 | 1.21E-07    | 8.14E-12 | 1.09E-13 | 4.44E-06    | 6.79E-10 |
| phe.Fasting_ rs149075406 S8  | DIAPH1     | rs78516788 S8  | SLC38A1   | 2.75E-11 | 0.00112269  | 3.94E-08 | 2.44E-10 | 0.00992686  | 6.74E-07 |
| phe.Fasting_ rs149075406 S8  | DIAPH1     | rs78736524 S5  | KPNA3     | 2.97E-15 | 1.21E-07    | 8.14E-12 | 1.18E-13 | 4.80E-06    | 7.06E-10 |
| phe.Fasting_ rs149075406 S8  | DIAPH1     | rs79781495 S8  | KPNA3     | 2.97E-15 | 1.21E-07    | 8.14E-12 | 1.09E-13 | 4.44E-06    | 6.79E-10 |
| phe.Fasting_ rs149075406 S8  | DIAPH1     | rs80332465 S5  | KPNA3     | 3.13E-15 | 1.28E-07    | 8.51E-12 | 1.17E-13 | 4.77E-06    | 7.06E-10 |
| phe.Fasting_ rs149075406 S8  | DIAPH1     | rs80334773 S5  | KPNA3     | 3.13E-15 | 1.28E-07    | 8.51E-12 | 1.17E-13 | 4.77E-06    | 7.06E-10 |
| phe.Fasting_ rs149334783 S8  | DIAPH1     | rs115787552 S5 | KPNA3     | 2.97E-15 | 1.21E-07    | 8.14E-12 | 1.18E-13 | 4.80E-06    | 7.06E-10 |
| phe.Fasting_ rs149334783 S8  | DIAPH1     | rs115888477 S8 | NA        | 2.03E-14 | 8.28E-07    | 5.02E-11 | 2.21E-14 | 8.99E-07    | 1.73E-10 |
| phe.Fasting_ rs149334783 S8  | DIAPH1     | rs116011837 S9 | BRD2      | 4.89E-11 | 0.00199774  | 6.62E-08 | 4.07E-14 | 1.66E-06    | 2.85E-10 |
| phe.Fasting_ rs149334783 S8  | DIAPH1     | rs116079984 S8 | KPNA3     | 2.97E-15 | 1.21E-07    | 8.14E-12 | 1.24E-13 | 5.04E-06    | 7.34E-10 |
| phe.Fasting_ rs149334783 S8  | DIAPH1     | rs116120727 S9 | BRD2      | 4.89E-11 | 0.00199774  | 6.62E-08 | 4.07E-14 | 1.66E-06    | 2.85E-10 |
| phe.Fasting_ rs149334783 S8  | DIAPH1     | rs116548615 S8 | TMEM45B   | 1.73E-16 | 7.06E-09    | 6.15E-13 | 8.70E-12 | 0.000354153 | 3.26E-08 |
| phe.Fasting_ rs149334783 S8  | DIAPH1     | rs146815317 S5 | KPNA3     | 2.97E-15 | 1.21E-07    | 8.14E-12 | 1.18E-13 | 4.80E-06    | 7.06E-10 |
| phe.Fasting_ rs149334783 S8  | DIAPH1     | rs150117838 S8 | KPNA3     | 2.97E-15 | 1.21E-07    | 8.14E-12 | 1.09E-13 | 4.44E-06    | 6.79E-10 |
| phe.Fasting_ rs149334783 S8  | DIAPH1     | rs16894241 S4  | HIST1H2BK | 1.99E-11 | 0.000812315 | 2.96E-08 | 3.44E-14 | 1.40E-06    | 2.50E-10 |
| phe.Fasting_ rs149334783 S8  | DIAPH1     | rs57503635 S3  | NA        | 6.34E-16 | 2.59E-08    | 1.95E-12 | 3.17E-14 | 1.29E-06    | 2.34E-10 |
| phe.Fasting_ rs149334783 S8  | DIAPH1     | rs7256517 S7   | CYTH2     | 1.04E-15 | 4.24E-08    | 3.06E-12 | 4.82E-12 | 0.000196022 | 1.91E-08 |
| phe.Fasting_ rs149334783 S8  | DIAPH1     | rs73392640 S8  | POLR3B    | 2.02E-10 | 0.00826001  | 2.49E-07 | 5.19E-11 | 0.00211214  | 1.67E-07 |
| phe.Fasting_ rs149334783 S8  | DIAPH1     | rs73619637 S8  | NA        | 1.44E-15 | 5.89E-08    | 4.14E-12 | 2.05E-10 | 0.00833668  | 5.78E-07 |
| phe.Fasting_ rs149334783 S8  | DIAPH1     | rs74914207 S24 | NA        | 1.37E-10 | 0.00558626  | 1.73E-07 | 9.12E-11 | 0.0037135   | 2.80E-07 |
| phe.Fasting_ rs149334783 S8  | DIAPH1     | rs75758702 S24 | NA        | 7.02E-17 | 2.87E-09    | 3.16E-13 | 1.57E-10 | 0.00638323  | 4.59E-07 |
| phe.Fasting_ rs149334783 S8  | DIAPH1     | rs7763107 S8   | FARS2     | 5.78E-16 | 2.36E-08    | 1.79E-12 | 9.23E-12 | 0.000375564 | 3.44E-08 |
| phe.Fasting_ rs149334783 S8  | DIAPH1     | rs77798597 S7  | KPNA3     | 2.97E-15 | 1.21E-07    | 8.14E-12 | 1.09E-13 | 4.44E-06    | 6.79E-10 |
| phe.Fasting_ rs149334783 S8  | DIAPH1     | rs78516788 S8  | SLC38A1   | 2.75E-11 | 0.00112269  | 3.94E-08 | 2.44E-10 | 0.00992686  | 6.74E-07 |
| phe.Fasting_ rs149334783 S8  | DIAPH1     | rs78736524 S5  | KPNA3     | 2.97E-15 | 1.21E-07    | 8.14E-12 | 1.18E-13 | 4.80E-06    | 7.06E-10 |
| phe.Fasting_ rs149334783 S8  | DIAPH1     | rs79781495 S8  | KPNA3     | 2.97E-15 | 1.21E-07    | 8.14E-12 | 1.09E-13 | 4.44E-06    | 6.79E-10 |
| phe.Fasting_ rs149334783 S8  | DIAPH1     | rs80332465 S5  | KPNA3     | 3.13E-15 | 1.28E-07    | 8.51E-12 | 1.17E-13 | 4.77E-06    | 7.06E-10 |
| phe.Fasting_ rs149334783 S8  | DIAPH1     | rs80334773 S5  | KPNA3     | 3.13E-15 | 1.28E-07    | 8.51E-12 | 1.17E-13 | 4.77E-06    | 7.06E-10 |
| phe.Fasting_ rs149553852 S21 | "PCDHGA10, | rs115787552 S5 | KPNA3     | 3.78E-16 | 1.54E-08    | 1.23E-12 | 4.20E-14 | 1.71E-06    | 2.93E-10 |
| phe.Fasting_ rs149553852 S21 | "PCDHGA10, | rs115888477 S8 | NA        | 2.72E-15 | 1.11E-07    | 7.62E-12 | 7.36E-15 | 3.00E-07    | 6.53E-11 |
| phe.Fasting_ rs149553852 S21 | "PCDHGA10, | rs116079984 S8 | KPNA3     | 3.78E-16 | 1.54E-08    | 1.23E-12 | 4.48E-14 | 1.82E-06    | 3.11E-10 |

|              |             |     |            |             |    |           |          |             |          |          |             |          |
|--------------|-------------|-----|------------|-------------|----|-----------|----------|-------------|----------|----------|-------------|----------|
| phe.Fasting_ | rs149553852 | S21 | "PCDHGA10, | rs116548615 | S8 | TMEM45B   | 2.04E-17 | 8.34E-10    | 1.43E-13 | 7.86E-12 | 0.000320069 | 2.98E-08 |
| phe.Fasting_ | rs149553852 | S21 | "PCDHGA10, | rs146815317 | S5 | KPNA3     | 3.78E-16 | 1.54E-08    | 1.23E-12 | 4.20E-14 | 1.71E-06    | 2.93E-10 |
| phe.Fasting_ | rs149553852 | S21 | "PCDHGA10, | rs150117838 | S8 | KPNA3     | 3.78E-16 | 1.54E-08    | 1.23E-12 | 3.89E-14 | 1.58E-06    | 2.77E-10 |
| phe.Fasting_ | rs149553852 | S21 | "PCDHGA10, | rs77798597  | S7 | KPNA3     | 3.78E-16 | 1.54E-08    | 1.23E-12 | 3.89E-14 | 1.58E-06    | 2.77E-10 |
| phe.Fasting_ | rs149553852 | S21 | "PCDHGA10, | rs78736524  | S5 | KPNA3     | 3.78E-16 | 1.54E-08    | 1.23E-12 | 4.20E-14 | 1.71E-06    | 2.93E-10 |
| phe.Fasting_ | rs149553852 | S21 | "PCDHGA10, | rs79781495  | S8 | KPNA3     | 3.78E-16 | 1.54E-08    | 1.23E-12 | 3.89E-14 | 1.58E-06    | 2.77E-10 |
| phe.Fasting_ | rs149553852 | S21 | "PCDHGA10, | rs80332465  | S5 | KPNA3     | 4.04E-16 | 1.65E-08    | 1.31E-12 | 4.20E-14 | 1.71E-06    | 2.93E-10 |
| phe.Fasting_ | rs149553852 | S21 | "PCDHGA10, | rs80334773  | S5 | KPNA3     | 4.04E-16 | 1.65E-08    | 1.31E-12 | 4.20E-14 | 1.71E-06    | 2.93E-10 |
| phe.Fasting_ | rs149716949 | S5  | DIAPH1     | rs115787552 | S5 | KPNA3     | 3.43E-16 | 1.40E-08    | 1.13E-12 | 1.11E-14 | 4.52E-07    | 9.57E-11 |
| phe.Fasting_ | rs149716949 | S5  | DIAPH1     | rs115888477 | S8 | NA        | 2.52E-15 | 1.03E-07    | 7.08E-12 | 1.96E-15 | 7.97E-08    | 2.11E-11 |
| phe.Fasting_ | rs149716949 | S5  | DIAPH1     | rs116011837 | S9 | BRD2      | 4.69E-12 | 0.00019166  | 8.39E-09 | 2.53E-15 | 1.03E-07    | 2.47E-11 |
| phe.Fasting_ | rs149716949 | S5  | DIAPH1     | rs116079984 | S8 | KPNA3     | 3.43E-16 | 1.40E-08    | 1.13E-12 | 1.23E-14 | 5.02E-07    | 1.06E-10 |
| phe.Fasting_ | rs149716949 | S5  | DIAPH1     | rs116120727 | S9 | BRD2      | 4.69E-12 | 0.00019166  | 8.39E-09 | 2.53E-15 | 1.03E-07    | 2.47E-11 |
| phe.Fasting_ | rs149716949 | S5  | DIAPH1     | rs146815317 | S5 | KPNA3     | 3.43E-16 | 1.40E-08    | 1.13E-12 | 1.11E-14 | 4.52E-07    | 9.57E-11 |
| phe.Fasting_ | rs149716949 | S5  | DIAPH1     | rs150117838 | S8 | KPNA3     | 3.43E-16 | 1.40E-08    | 1.13E-12 | 1.08E-14 | 4.39E-07    | 9.34E-11 |
| phe.Fasting_ | rs149716949 | S5  | DIAPH1     | rs16894241  | S4 | HIST1H2BK | 1.60E-12 | 6.55E-05    | 3.12E-09 | 2.98E-15 | 1.21E-07    | 2.87E-11 |
| phe.Fasting_ | rs149716949 | S5  | DIAPH1     | rs57503635  | S3 | NA        | 7.80E-17 | 3.19E-09    | 3.46E-13 | 3.01E-15 | 1.22E-07    | 2.90E-11 |
| phe.Fasting_ | rs149716949 | S5  | DIAPH1     | rs7256517   | S7 | CYTH2     | 1.17E-16 | 4.79E-09    | 4.85E-13 | 4.07E-13 | 1.66E-05    | 2.19E-09 |
| phe.Fasting_ | rs149716949 | S5  | DIAPH1     | rs73392640  | S8 | POLR3B    | 1.99E-11 | 0.000814054 | 2.96E-08 | 5.38E-12 | 0.000219004 | 2.11E-08 |
| phe.Fasting_ | rs149716949 | S5  | DIAPH1     | rs75758702  | S4 | NA        | 7.30E-18 | 2.98E-10    | 8.31E-14 | 1.20E-11 | 0.00048753  | 4.39E-08 |
| phe.Fasting_ | rs149716949 | S5  | DIAPH1     | rs77798597  | S7 | KPNA3     | 3.43E-16 | 1.40E-08    | 1.13E-12 | 1.08E-14 | 4.39E-07    | 9.34E-11 |
| phe.Fasting_ | rs149716949 | S5  | DIAPH1     | rs78516788  | S8 | SLC38A1   | 2.10E-12 | 8.56E-05    | 3.94E-09 | 3.41E-11 | 0.00138926  | 1.14E-07 |
| phe.Fasting_ | rs149716949 | S5  | DIAPH1     | rs78697063  | S5 | MSI2      | 4.40E-20 | 1.80E-12    | 2.23E-14 | 6.40E-11 | 0.00260631  | 2.03E-07 |
| phe.Fasting_ | rs149716949 | S5  | DIAPH1     | rs78736524  | S5 | KPNA3     | 3.43E-16 | 1.40E-08    | 1.13E-12 | 1.11E-14 | 4.52E-07    | 9.57E-11 |
| phe.Fasting_ | rs149716949 | S5  | DIAPH1     | rs79781495  | S8 | KPNA3     | 3.43E-16 | 1.40E-08    | 1.13E-12 | 1.08E-14 | 4.39E-07    | 9.34E-11 |
| phe.Fasting_ | rs149716949 | S5  | DIAPH1     | rs80332465  | S5 | KPNA3     | 3.62E-16 | 1.48E-08    | 1.19E-12 | 1.16E-14 | 4.74E-07    | 1.00E-10 |
| phe.Fasting_ | rs149716949 | S5  | DIAPH1     | rs80334773  | S5 | KPNA3     | 3.62E-16 | 1.48E-08    | 1.19E-12 | 1.16E-14 | 4.74E-07    | 1.00E-10 |
| phe.Fasting_ | rs149791570 | S5  | DIAPH1     | rs112089881 | S8 | ZFAND4    | 3.24E-18 | 1.32E-10    | 5.45E-14 | 1.95E-10 | 0.00795558  | 5.56E-07 |
| phe.Fasting_ | rs149791570 | S5  | DIAPH1     | rs115787552 | S5 | KPNA3     | 5.05E-16 | 2.06E-08    | 1.59E-12 | 2.34E-14 | 9.53E-07    | 1.79E-10 |
| phe.Fasting_ | rs149791570 | S5  | DIAPH1     | rs115888477 | S8 | NA        | 3.68E-15 | 1.50E-07    | 9.90E-12 | 4.11E-15 | 1.67E-07    | 3.84E-11 |
| phe.Fasting_ | rs149791570 | S5  | DIAPH1     | rs116011837 | S9 | BRD2      | 9.60E-12 | 0.000392176 | 1.53E-08 | 9.05E-15 | 3.68E-07    | 7.90E-11 |
| phe.Fasting_ | rs149791570 | S5  | DIAPH1     | rs116079984 | S8 | KPNA3     | 5.05E-16 | 2.06E-08    | 1.59E-12 | 2.56E-14 | 1.04E-06    | 1.94E-10 |
| phe.Fasting_ | rs149791570 | S5  | DIAPH1     | rs116120727 | S9 | BRD2      | 9.60E-12 | 0.000392176 | 1.53E-08 | 9.05E-15 | 3.68E-07    | 7.90E-11 |
| phe.Fasting_ | rs149791570 | S5  | DIAPH1     | rs116548615 | S8 | TMEM45B   | 2.95E-17 | 1.21E-09    | 1.69E-13 | 1.76E-12 | 7.17E-05    | 7.72E-09 |
| phe.Fasting_ | rs149791570 | S5  | DIAPH1     | rs146815317 | S5 | KPNA3     | 5.05E-16 | 2.06E-08    | 1.59E-12 | 2.34E-14 | 9.53E-07    | 1.79E-10 |
| phe.Fasting_ | rs149791570 | S5  | DIAPH1     | rs150117838 | S8 | KPNA3     | 5.05E-16 | 2.06E-08    | 1.59E-12 | 2.16E-14 | 8.80E-07    | 1.71E-10 |
| phe.Fasting_ | rs149791570 | S5  | DIAPH1     | rs16894241  | S4 | HIST1H2BK | 3.73E-12 | 0.000152384 | 6.73E-09 | 6.62E-15 | 2.69E-07    | 5.94E-11 |
| phe.Fasting_ | rs149791570 | S5  | DIAPH1     | rs57503635  | S3 | NA        | 1.28E-16 | 5.23E-09    | 5.19E-13 | 6.61E-15 | 2.69E-07    | 5.94E-11 |
| phe.Fasting_ | rs149791570 | S5  | DIAPH1     | rs7256517   | S7 | CYTH2     | 1.59E-16 | 6.48E-09    | 6.03E-13 | 9.69E-13 | 3.95E-05    | 4.59E-09 |
| phe.Fasting_ | rs149791570 | S5  | DIAPH1     | rs73392640  | S8 | POLR3B    | 4.58E-11 | 0.00187102  | 6.24E-08 | 6.82E-12 | 0.000277641 | 2.62E-08 |

|              |                |             |             |     |           |          |             |          |          |             |          |
|--------------|----------------|-------------|-------------|-----|-----------|----------|-------------|----------|----------|-------------|----------|
| phe.Fasting_ | rs149791570S5  | DIAPH1      | rs74914207  | S24 | NA        | 2.89E-11 | 0.00117833  | 4.13E-08 | 1.56E-11 | 0.000634366 | 5.60E-08 |
| phe.Fasting_ | rs149791570S5  | DIAPH1      | rs75758702  | S24 | NA        | 1.04E-17 | 4.25E-10    | 9.89E-14 | 2.85E-11 | 0.00115844  | 9.77E-08 |
| phe.Fasting_ | rs149791570S5  | DIAPH1      | rs7763107   | S8  | FARS2     | 9.44E-17 | 3.86E-09    | 4.06E-13 | 1.60E-12 | 6.52E-05    | 7.13E-09 |
| phe.Fasting_ | rs149791570S5  | DIAPH1      | rs77798597  | S7  | KPNA3     | 5.05E-16 | 2.06E-08    | 1.59E-12 | 2.16E-14 | 8.80E-07    | 1.71E-10 |
| phe.Fasting_ | rs149791570S5  | DIAPH1      | rs78697063  | S5  | MSI2      | 7.77E-20 | 3.17E-12    | 2.23E-14 | 1.45E-10 | 0.00591847  | 4.35E-07 |
| phe.Fasting_ | rs149791570S5  | DIAPH1      | rs78736524  | S5  | KPNA3     | 5.05E-16 | 2.06E-08    | 1.59E-12 | 2.34E-14 | 9.53E-07    | 1.79E-10 |
| phe.Fasting_ | rs149791570S5  | DIAPH1      | rs79781495  | S8  | KPNA3     | 5.05E-16 | 2.06E-08    | 1.59E-12 | 2.16E-14 | 8.80E-07    | 1.71E-10 |
| phe.Fasting_ | rs149791570S5  | DIAPH1      | rs80332465  | S5  | KPNA3     | 5.36E-16 | 2.19E-08    | 1.67E-12 | 2.32E-14 | 9.45E-07    | 1.79E-10 |
| phe.Fasting_ | rs149791570S5  | DIAPH1      | rs80334773  | S5  | KPNA3     | 5.36E-16 | 2.19E-08    | 1.67E-12 | 2.32E-14 | 9.45E-07    | 1.79E-10 |
| phe.Fasting_ | rs150117838S8  | KPNA3       | rs57503635  | S3  | NA        | 1.29E-15 | 5.25E-08    | 3.74E-12 | 4.13E-15 | 1.68E-07    | 3.85E-11 |
| phe.Fasting_ | rs150452206S13 | "DIAPH1,LOC | rs115787552 | S5  | KPNA3     | 2.97E-15 | 1.21E-07    | 8.14E-12 | 1.18E-13 | 4.80E-06    | 7.06E-10 |
| phe.Fasting_ | rs150452206S13 | "DIAPH1,LOC | rs115888477 | S8  | NA        | 2.03E-14 | 8.28E-07    | 5.02E-11 | 2.21E-14 | 8.99E-07    | 1.73E-10 |
| phe.Fasting_ | rs150452206S13 | "DIAPH1,LOC | rs116011837 | S9  | BRD2      | 4.89E-11 | 0.00199774  | 6.62E-08 | 4.07E-14 | 1.66E-06    | 2.85E-10 |
| phe.Fasting_ | rs150452206S13 | "DIAPH1,LOC | rs116079984 | S8  | KPNA3     | 2.97E-15 | 1.21E-07    | 8.14E-12 | 1.24E-13 | 5.04E-06    | 7.34E-10 |
| phe.Fasting_ | rs150452206S13 | "DIAPH1,LOC | rs116120727 | S9  | BRD2      | 4.89E-11 | 0.00199774  | 6.62E-08 | 4.07E-14 | 1.66E-06    | 2.85E-10 |
| phe.Fasting_ | rs150452206S13 | "DIAPH1,LOC | rs116548615 | S8  | TMEM45B   | 1.73E-16 | 7.06E-09    | 6.15E-13 | 8.70E-12 | 0.000354153 | 3.26E-08 |
| phe.Fasting_ | rs150452206S13 | "DIAPH1,LOC | rs146815317 | S5  | KPNA3     | 2.97E-15 | 1.21E-07    | 8.14E-12 | 1.18E-13 | 4.80E-06    | 7.06E-10 |
| phe.Fasting_ | rs150452206S13 | "DIAPH1,LOC | rs150117838 | S8  | KPNA3     | 2.97E-15 | 1.21E-07    | 8.14E-12 | 1.09E-13 | 4.44E-06    | 6.79E-10 |
| phe.Fasting_ | rs150452206S13 | "DIAPH1,LOC | rs16894241  | S4  | HIST1H2BK | 1.99E-11 | 0.000812315 | 2.96E-08 | 3.44E-14 | 1.40E-06    | 2.50E-10 |
| phe.Fasting_ | rs150452206S13 | "DIAPH1,LOC | rs57503635  | S3  | NA        | 6.34E-16 | 2.59E-08    | 1.95E-12 | 3.17E-14 | 1.29E-06    | 2.34E-10 |
| phe.Fasting_ | rs150452206S13 | "DIAPH1,LOC | rs7256517   | S7  | CYTH2     | 1.04E-15 | 4.24E-08    | 3.06E-12 | 4.82E-12 | 0.000196022 | 1.91E-08 |
| phe.Fasting_ | rs150452206S13 | "DIAPH1,LOC | rs73392640  | S8  | POLR3B    | 2.02E-10 | 0.00826001  | 2.49E-07 | 5.19E-11 | 0.00211214  | 1.67E-07 |
| phe.Fasting_ | rs150452206S13 | "DIAPH1,LOC | rs73619637  | S8  | NA        | 1.44E-15 | 5.89E-08    | 4.14E-12 | 2.05E-10 | 0.00833668  | 5.78E-07 |
| phe.Fasting_ | rs150452206S13 | "DIAPH1,LOC | rs74914207  | S24 | NA        | 1.37E-10 | 0.00558626  | 1.73E-07 | 9.12E-11 | 0.0037135   | 2.80E-07 |
| phe.Fasting_ | rs150452206S13 | "DIAPH1,LOC | rs75758702  | S24 | NA        | 7.02E-17 | 2.87E-09    | 3.16E-13 | 1.57E-10 | 0.00638323  | 4.59E-07 |
| phe.Fasting_ | rs150452206S13 | "DIAPH1,LOC | rs7763107   | S8  | FARS2     | 5.78E-16 | 2.36E-08    | 1.79E-12 | 9.23E-12 | 0.000375564 | 3.44E-08 |
| phe.Fasting_ | rs150452206S13 | "DIAPH1,LOC | rs77798597  | S7  | KPNA3     | 2.97E-15 | 1.21E-07    | 8.14E-12 | 1.09E-13 | 4.44E-06    | 6.79E-10 |
| phe.Fasting_ | rs150452206S13 | "DIAPH1,LOC | rs78516788  | S8  | SLC38A1   | 2.75E-11 | 0.00112269  | 3.94E-08 | 2.44E-10 | 0.00992686  | 6.74E-07 |
| phe.Fasting_ | rs150452206S13 | "DIAPH1,LOC | rs78736524  | S5  | KPNA3     | 2.97E-15 | 1.21E-07    | 8.14E-12 | 1.18E-13 | 4.80E-06    | 7.06E-10 |
| phe.Fasting_ | rs150452206S13 | "DIAPH1,LOC | rs79781495  | S8  | KPNA3     | 2.97E-15 | 1.21E-07    | 8.14E-12 | 1.09E-13 | 4.44E-06    | 6.79E-10 |
| phe.Fasting_ | rs150452206S13 | "DIAPH1,LOC | rs80332465  | S5  | KPNA3     | 3.13E-15 | 1.28E-07    | 8.51E-12 | 1.17E-13 | 4.77E-06    | 7.06E-10 |
| phe.Fasting_ | rs150452206S13 | "DIAPH1,LOC | rs80334773  | S5  | KPNA3     | 3.13E-15 | 1.28E-07    | 8.51E-12 | 1.17E-13 | 4.77E-06    | 7.06E-10 |
| phe.Fasting_ | rs150675915S7  | DIAPH1      | rs115787552 | S5  | KPNA3     | 2.97E-15 | 1.21E-07    | 8.14E-12 | 1.18E-13 | 4.80E-06    | 7.06E-10 |
| phe.Fasting_ | rs150675915S7  | DIAPH1      | rs115888477 | S8  | NA        | 2.03E-14 | 8.28E-07    | 5.02E-11 | 2.21E-14 | 8.99E-07    | 1.73E-10 |
| phe.Fasting_ | rs150675915S7  | DIAPH1      | rs116011837 | S9  | BRD2      | 4.89E-11 | 0.00199774  | 6.62E-08 | 4.07E-14 | 1.66E-06    | 2.85E-10 |
| phe.Fasting_ | rs150675915S7  | DIAPH1      | rs116079984 | S8  | KPNA3     | 2.97E-15 | 1.21E-07    | 8.14E-12 | 1.24E-13 | 5.04E-06    | 7.34E-10 |
| phe.Fasting_ | rs150675915S7  | DIAPH1      | rs116120727 | S9  | BRD2      | 4.89E-11 | 0.00199774  | 6.62E-08 | 4.07E-14 | 1.66E-06    | 2.85E-10 |
| phe.Fasting_ | rs150675915S7  | DIAPH1      | rs116548615 | S8  | TMEM45B   | 1.73E-16 | 7.06E-09    | 6.15E-13 | 8.70E-12 | 0.000354153 | 3.26E-08 |
| phe.Fasting_ | rs150675915S7  | DIAPH1      | rs146815317 | S5  | KPNA3     | 2.97E-15 | 1.21E-07    | 8.14E-12 | 1.18E-13 | 4.80E-06    | 7.06E-10 |
| phe.Fasting_ | rs150675915S7  | DIAPH1      | rs150117838 | S8  | KPNA3     | 2.97E-15 | 1.21E-07    | 8.14E-12 | 1.09E-13 | 4.44E-06    | 6.79E-10 |

|                           |           |             |     |           |          |             |          |          |             |          |
|---------------------------|-----------|-------------|-----|-----------|----------|-------------|----------|----------|-------------|----------|
| phe.Fasting_rs150675915S7 | DIAPH1    | rs16894241  | S4  | HIST1H2BK | 1.99E-11 | 0.000812315 | 2.96E-08 | 3.44E-14 | 1.40E-06    | 2.50E-10 |
| phe.Fasting_rs150675915S7 | DIAPH1    | rs57503635  | S3  | NA        | 6.34E-16 | 2.59E-08    | 1.95E-12 | 3.17E-14 | 1.29E-06    | 2.34E-10 |
| phe.Fasting_rs150675915S7 | DIAPH1    | rs7256517   | S7  | CYTH2     | 1.04E-15 | 4.24E-08    | 3.06E-12 | 4.82E-12 | 0.000196022 | 1.91E-08 |
| phe.Fasting_rs150675915S7 | DIAPH1    | rs73392640  | S8  | POLR3B    | 2.02E-10 | 0.00826001  | 2.49E-07 | 5.19E-11 | 0.00211214  | 1.67E-07 |
| phe.Fasting_rs150675915S7 | DIAPH1    | rs73619637  | S8  | NA        | 1.44E-15 | 5.89E-08    | 4.14E-12 | 2.05E-10 | 0.00833668  | 5.78E-07 |
| phe.Fasting_rs150675915S7 | DIAPH1    | rs74914207  | S24 | NA        | 1.37E-10 | 0.00558626  | 1.73E-07 | 9.12E-11 | 0.0037135   | 2.80E-07 |
| phe.Fasting_rs150675915S7 | DIAPH1    | rs75758702  | S24 | NA        | 7.02E-17 | 2.87E-09    | 3.16E-13 | 1.57E-10 | 0.00638323  | 4.59E-07 |
| phe.Fasting_rs150675915S7 | DIAPH1    | rs7763107   | S8  | FARS2     | 5.78E-16 | 2.36E-08    | 1.79E-12 | 9.23E-12 | 0.000375564 | 3.44E-08 |
| phe.Fasting_rs150675915S7 | DIAPH1    | rs77798597  | S7  | KPNA3     | 2.97E-15 | 1.21E-07    | 8.14E-12 | 1.09E-13 | 4.44E-06    | 6.79E-10 |
| phe.Fasting_rs150675915S7 | DIAPH1    | rs78516788  | S8  | SLC38A1   | 2.75E-11 | 0.00112269  | 3.94E-08 | 2.44E-10 | 0.00992686  | 6.74E-07 |
| phe.Fasting_rs150675915S7 | DIAPH1    | rs78736524  | S5  | KPNA3     | 2.97E-15 | 1.21E-07    | 8.14E-12 | 1.18E-13 | 4.80E-06    | 7.06E-10 |
| phe.Fasting_rs150675915S7 | DIAPH1    | rs79781495  | S8  | KPNA3     | 2.97E-15 | 1.21E-07    | 8.14E-12 | 1.09E-13 | 4.44E-06    | 6.79E-10 |
| phe.Fasting_rs150675915S7 | DIAPH1    | rs80332465  | S5  | KPNA3     | 3.13E-15 | 1.28E-07    | 8.51E-12 | 1.17E-13 | 4.77E-06    | 7.06E-10 |
| phe.Fasting_rs150675915S7 | DIAPH1    | rs80334773  | S5  | KPNA3     | 3.13E-15 | 1.28E-07    | 8.51E-12 | 1.17E-13 | 4.77E-06    | 7.06E-10 |
| phe.Fasting_rs150765570S7 | DIAPH1    | rs115787552 | S5  | KPNA3     | 2.97E-15 | 1.21E-07    | 8.14E-12 | 1.18E-13 | 4.80E-06    | 7.06E-10 |
| phe.Fasting_rs150765570S7 | DIAPH1    | rs115888477 | S8  | NA        | 2.03E-14 | 8.28E-07    | 5.02E-11 | 2.21E-14 | 8.99E-07    | 1.73E-10 |
| phe.Fasting_rs150765570S7 | DIAPH1    | rs116011837 | S9  | BRD2      | 4.89E-11 | 0.00199774  | 6.62E-08 | 4.07E-14 | 1.66E-06    | 2.85E-10 |
| phe.Fasting_rs150765570S7 | DIAPH1    | rs116079984 | S8  | KPNA3     | 2.97E-15 | 1.21E-07    | 8.14E-12 | 1.24E-13 | 5.04E-06    | 7.34E-10 |
| phe.Fasting_rs150765570S7 | DIAPH1    | rs116120727 | S9  | BRD2      | 4.89E-11 | 0.00199774  | 6.62E-08 | 4.07E-14 | 1.66E-06    | 2.85E-10 |
| phe.Fasting_rs150765570S7 | DIAPH1    | rs116548615 | S8  | TMEM45B   | 1.73E-16 | 7.06E-09    | 6.15E-13 | 8.70E-12 | 0.000354153 | 3.26E-08 |
| phe.Fasting_rs150765570S7 | DIAPH1    | rs146815317 | S5  | KPNA3     | 2.97E-15 | 1.21E-07    | 8.14E-12 | 1.18E-13 | 4.80E-06    | 7.06E-10 |
| phe.Fasting_rs150765570S7 | DIAPH1    | rs150117838 | S8  | KPNA3     | 2.97E-15 | 1.21E-07    | 8.14E-12 | 1.09E-13 | 4.44E-06    | 6.79E-10 |
| phe.Fasting_rs150765570S7 | DIAPH1    | rs16894241  | S4  | HIST1H2BK | 1.99E-11 | 0.000812315 | 2.96E-08 | 3.44E-14 | 1.40E-06    | 2.50E-10 |
| phe.Fasting_rs150765570S7 | DIAPH1    | rs57503635  | S3  | NA        | 6.34E-16 | 2.59E-08    | 1.95E-12 | 3.17E-14 | 1.29E-06    | 2.34E-10 |
| phe.Fasting_rs150765570S7 | DIAPH1    | rs7256517   | S7  | CYTH2     | 1.04E-15 | 4.24E-08    | 3.06E-12 | 4.82E-12 | 0.000196022 | 1.91E-08 |
| phe.Fasting_rs150765570S7 | DIAPH1    | rs73392640  | S8  | POLR3B    | 2.02E-10 | 0.00826001  | 2.49E-07 | 5.19E-11 | 0.00211214  | 1.67E-07 |
| phe.Fasting_rs150765570S7 | DIAPH1    | rs73619637  | S8  | NA        | 1.44E-15 | 5.89E-08    | 4.14E-12 | 2.05E-10 | 0.00833668  | 5.78E-07 |
| phe.Fasting_rs150765570S7 | DIAPH1    | rs74914207  | S24 | NA        | 1.37E-10 | 0.00558626  | 1.73E-07 | 9.12E-11 | 0.0037135   | 2.80E-07 |
| phe.Fasting_rs150765570S7 | DIAPH1    | rs75758702  | S24 | NA        | 7.02E-17 | 2.87E-09    | 3.16E-13 | 1.57E-10 | 0.00638323  | 4.59E-07 |
| phe.Fasting_rs150765570S7 | DIAPH1    | rs7763107   | S8  | FARS2     | 5.78E-16 | 2.36E-08    | 1.79E-12 | 9.23E-12 | 0.000375564 | 3.44E-08 |
| phe.Fasting_rs150765570S7 | DIAPH1    | rs77798597  | S7  | KPNA3     | 2.97E-15 | 1.21E-07    | 8.14E-12 | 1.09E-13 | 4.44E-06    | 6.79E-10 |
| phe.Fasting_rs150765570S7 | DIAPH1    | rs78516788  | S8  | SLC38A1   | 2.75E-11 | 0.00112269  | 3.94E-08 | 2.44E-10 | 0.00992686  | 6.74E-07 |
| phe.Fasting_rs150765570S7 | DIAPH1    | rs78736524  | S5  | KPNA3     | 2.97E-15 | 1.21E-07    | 8.14E-12 | 1.18E-13 | 4.80E-06    | 7.06E-10 |
| phe.Fasting_rs150765570S7 | DIAPH1    | rs79781495  | S8  | KPNA3     | 2.97E-15 | 1.21E-07    | 8.14E-12 | 1.09E-13 | 4.44E-06    | 6.79E-10 |
| phe.Fasting_rs150765570S7 | DIAPH1    | rs80332465  | S5  | KPNA3     | 3.13E-15 | 1.28E-07    | 8.51E-12 | 1.17E-13 | 4.77E-06    | 7.06E-10 |
| phe.Fasting_rs150765570S7 | DIAPH1    | rs80334773  | S5  | KPNA3     | 3.13E-15 | 1.28E-07    | 8.51E-12 | 1.17E-13 | 4.77E-06    | 7.06E-10 |
| phe.Fasting_rs150916187S4 | HIST1H2BK | rs114565620 | S8  | RCL1      | 9.38E-17 | 3.83E-09    | 4.04E-13 | 4.82E-16 | 1.96E-08    | 1.16E-11 |
| phe.Fasting_rs150916187S4 | HIST1H2BK | rs115787552 | S5  | KPNA3     | 2.90E-16 | 1.19E-08    | 9.67E-13 | 1.02E-11 | 0.000415894 | 3.78E-08 |
| phe.Fasting_rs150916187S4 | HIST1H2BK | rs116079984 | S8  | KPNA3     | 2.90E-16 | 1.19E-08    | 9.67E-13 | 1.28E-11 | 0.000521901 | 4.69E-08 |
| phe.Fasting_rs150916187S4 | HIST1H2BK | rs146815317 | S5  | KPNA3     | 2.90E-16 | 1.19E-08    | 9.67E-13 | 1.02E-11 | 0.000415894 | 3.78E-08 |

|              |                 |           |                 |           |          |             |          |          |             |          |
|--------------|-----------------|-----------|-----------------|-----------|----------|-------------|----------|----------|-------------|----------|
| phe.Fasting_ | rs150916187 S4  | HIST1H2BK | rs150117838 S8  | KPNA3     | 2.90E-16 | 1.19E-08    | 9.67E-13 | 9.76E-12 | 0.000397184 | 3.62E-08 |
| phe.Fasting_ | rs150916187 S4  | HIST1H2BK | rs75350765 S5   | RCL1      | 9.38E-17 | 3.83E-09    | 4.04E-13 | 4.82E-16 | 1.96E-08    | 1.16E-11 |
| phe.Fasting_ | rs150916187 S4  | HIST1H2BK | rs77798597 S7   | KPNA3     | 2.90E-16 | 1.19E-08    | 9.67E-13 | 9.76E-12 | 0.000397184 | 3.62E-08 |
| phe.Fasting_ | rs150916187 S4  | HIST1H2BK | rs78736524 S5   | KPNA3     | 2.90E-16 | 1.19E-08    | 9.67E-13 | 1.02E-11 | 0.000415894 | 3.78E-08 |
| phe.Fasting_ | rs150916187 S4  | HIST1H2BK | rs79781495 S8   | KPNA3     | 2.90E-16 | 1.19E-08    | 9.67E-13 | 9.76E-12 | 0.000397184 | 3.62E-08 |
| phe.Fasting_ | rs150916187 S4  | HIST1H2BK | rs80332465 S5   | KPNA3     | 3.13E-16 | 1.28E-08    | 1.04E-12 | 1.03E-11 | 0.000421273 | 3.83E-08 |
| phe.Fasting_ | rs150916187 S4  | HIST1H2BK | rs80334773 S5   | KPNA3     | 3.13E-16 | 1.28E-08    | 1.04E-12 | 1.03E-11 | 0.000421273 | 3.83E-08 |
| phe.Fasting_ | rs150992994 S11 | "PCDHGA5, | Prs115787552 S5 | KPNA3     | 3.03E-15 | 1.24E-07    | 8.30E-12 | 1.11E-13 | 4.53E-06    | 6.88E-10 |
| phe.Fasting_ | rs150992994 S11 | "PCDHGA5, | Prs115888477 S8 | NA        | 2.06E-14 | 8.42E-07    | 5.10E-11 | 2.09E-14 | 8.49E-07    | 1.66E-10 |
| phe.Fasting_ | rs150992994 S11 | "PCDHGA5, | Prs116011837 S9 | BRD2      | 5.03E-11 | 0.00205601  | 6.81E-08 | 3.85E-14 | 1.57E-06    | 2.76E-10 |
| phe.Fasting_ | rs150992994 S11 | "PCDHGA5, | Prs116079984 S8 | KPNA3     | 3.03E-15 | 1.24E-07    | 8.30E-12 | 1.16E-13 | 4.73E-06    | 7.06E-10 |
| phe.Fasting_ | rs150992994 S11 | "PCDHGA5, | Prs116120727 S9 | BRD2      | 5.03E-11 | 0.00205601  | 6.81E-08 | 3.85E-14 | 1.57E-06    | 2.76E-10 |
| phe.Fasting_ | rs150992994 S11 | "PCDHGA5, | Prs116548615 S8 | TMEM45B   | 1.86E-16 | 7.59E-09    | 6.50E-13 | 2.35E-11 | 0.000956989 | 8.18E-08 |
| phe.Fasting_ | rs150992994 S11 | "PCDHGA5, | Prs146815317 S5 | KPNA3     | 3.03E-15 | 1.24E-07    | 8.30E-12 | 1.11E-13 | 4.53E-06    | 6.88E-10 |
| phe.Fasting_ | rs150992994 S11 | "PCDHGA5, | Prs150117838 S8 | KPNA3     | 3.03E-15 | 1.24E-07    | 8.30E-12 | 1.03E-13 | 4.19E-06    | 6.54E-10 |
| phe.Fasting_ | rs150992994 S11 | "PCDHGA5, | Prs16894241 S4  | HIST1H2BK | 2.02E-11 | 0.000826881 | 3.01E-08 | 3.27E-14 | 1.33E-06    | 2.40E-10 |
| phe.Fasting_ | rs150992994 S11 | "PCDHGA5, | Prs2153597 S8   | ZNF438    | 5.56E-11 | 0.00227064  | 7.48E-08 | 4.15E-11 | 0.00168769  | 1.37E-07 |
| phe.Fasting_ | rs150992994 S11 | "PCDHGA5, | Prs57503635 S3  | NA        | 6.55E-16 | 2.68E-08    | 2.01E-12 | 3.12E-14 | 1.27E-06    | 2.32E-10 |
| phe.Fasting_ | rs150992994 S11 | "PCDHGA5, | Prs7256517 S7   | CYTH2     | 1.08E-15 | 4.40E-08    | 3.17E-12 | 4.57E-12 | 0.000185844 | 1.82E-08 |
| phe.Fasting_ | rs150992994 S11 | "PCDHGA5, | Prs73392640 S8  | POLR3B    | 2.01E-10 | 0.00822221  | 2.48E-07 | 4.86E-11 | 0.00197665  | 1.57E-07 |
| phe.Fasting_ | rs150992994 S11 | "PCDHGA5, | Prs73619637 S8  | NA        | 1.47E-15 | 6.01E-08    | 4.22E-12 | 1.84E-10 | 0.00749129  | 5.27E-07 |
| phe.Fasting_ | rs150992994 S11 | "PCDHGA5, | Prs74914207 S24 | NA        | 1.47E-10 | 0.00599338  | 1.85E-07 | 1.91E-10 | 0.00776557  | 5.44E-07 |
| phe.Fasting_ | rs150992994 S11 | "PCDHGA5, | Prs75758702 S24 | NA        | 7.20E-17 | 2.94E-09    | 3.23E-13 | 1.53E-10 | 0.00623178  | 4.53E-07 |
| phe.Fasting_ | rs150992994 S11 | "PCDHGA5, | Prs7763107 S8   | FARS2     | 5.93E-16 | 2.42E-08    | 1.84E-12 | 8.70E-12 | 0.000354061 | 3.26E-08 |
| phe.Fasting_ | rs150992994 S11 | "PCDHGA5, | Prs77798597 S7  | KPNA3     | 3.03E-15 | 1.24E-07    | 8.30E-12 | 1.03E-13 | 4.19E-06    | 6.54E-10 |
| phe.Fasting_ | rs150992994 S11 | "PCDHGA5, | Prs78516788 S8  | SLC38A1   | 2.69E-11 | 0.00109941  | 3.87E-08 | 2.31E-10 | 0.00941253  | 6.43E-07 |
| phe.Fasting_ | rs150992994 S11 | "PCDHGA5, | Prs78736524 S5  | KPNA3     | 3.03E-15 | 1.24E-07    | 8.30E-12 | 1.11E-13 | 4.53E-06    | 6.88E-10 |
| phe.Fasting_ | rs150992994 S11 | "PCDHGA5, | Prs79781495 S8  | KPNA3     | 3.03E-15 | 1.24E-07    | 8.30E-12 | 1.03E-13 | 4.19E-06    | 6.54E-10 |
| phe.Fasting_ | rs150992994 S11 | "PCDHGA5, | Prs80332465 S5  | KPNA3     | 3.20E-15 | 1.31E-07    | 8.70E-12 | 1.11E-13 | 4.51E-06    | 6.85E-10 |
| phe.Fasting_ | rs150992994 S11 | "PCDHGA5, | Prs80334773 S5  | KPNA3     | 3.20E-15 | 1.31E-07    | 8.70E-12 | 1.11E-13 | 4.51E-06    | 6.85E-10 |
| phe.Fasting_ | rs151204700 S8  | DIAPH1    | rs115787552 S5  | KPNA3     | 2.97E-15 | 1.21E-07    | 8.14E-12 | 1.18E-13 | 4.80E-06    | 7.06E-10 |
| phe.Fasting_ | rs151204700 S8  | DIAPH1    | rs115888477 S8  | NA        | 2.03E-14 | 8.28E-07    | 5.02E-11 | 2.21E-14 | 8.99E-07    | 1.73E-10 |
| phe.Fasting_ | rs151204700 S8  | DIAPH1    | rs116011837 S9  | BRD2      | 4.89E-11 | 0.00199774  | 6.62E-08 | 4.07E-14 | 1.66E-06    | 2.85E-10 |
| phe.Fasting_ | rs151204700 S8  | DIAPH1    | rs116079984 S8  | KPNA3     | 2.97E-15 | 1.21E-07    | 8.14E-12 | 1.24E-13 | 5.04E-06    | 7.34E-10 |
| phe.Fasting_ | rs151204700 S8  | DIAPH1    | rs116120727 S9  | BRD2      | 4.89E-11 | 0.00199774  | 6.62E-08 | 4.07E-14 | 1.66E-06    | 2.85E-10 |
| phe.Fasting_ | rs151204700 S8  | DIAPH1    | rs116548615 S8  | TMEM45B   | 1.73E-16 | 7.06E-09    | 6.15E-13 | 8.70E-12 | 0.000354153 | 3.26E-08 |
| phe.Fasting_ | rs151204700 S8  | DIAPH1    | rs146815317 S5  | KPNA3     | 2.97E-15 | 1.21E-07    | 8.14E-12 | 1.18E-13 | 4.80E-06    | 7.06E-10 |
| phe.Fasting_ | rs151204700 S8  | DIAPH1    | rs150117838 S8  | KPNA3     | 2.97E-15 | 1.21E-07    | 8.14E-12 | 1.09E-13 | 4.44E-06    | 6.79E-10 |
| phe.Fasting_ | rs151204700 S8  | DIAPH1    | rs16894241 S4   | HIST1H2BK | 1.99E-11 | 0.000812315 | 2.96E-08 | 3.44E-14 | 1.40E-06    | 2.50E-10 |
| phe.Fasting_ | rs151204700 S8  | DIAPH1    | rs57503635 S3   | NA        | 6.34E-16 | 2.59E-08    | 1.95E-12 | 3.17E-14 | 1.29E-06    | 2.34E-10 |



|                           |        |             |     |           |          |             |          |          |             |          |
|---------------------------|--------|-------------|-----|-----------|----------|-------------|----------|----------|-------------|----------|
| phe.Fasting_rs151204700S8 | DIAPH1 | rs7256517   | S7  | CYTH2     | 1.04E-15 | 4.24E-08    | 3.06E-12 | 4.82E-12 | 0.000196022 | 1.91E-08 |
| phe.Fasting_rs151204700S8 | DIAPH1 | rs73392640  | S8  | POLR3B    | 2.02E-10 | 0.00826001  | 2.49E-07 | 5.19E-11 | 0.00211214  | 1.67E-07 |
| phe.Fasting_rs151204700S8 | DIAPH1 | rs73619637  | S8  | NA        | 1.44E-15 | 5.89E-08    | 4.14E-12 | 2.05E-10 | 0.00833668  | 5.78E-07 |
| phe.Fasting_rs151204700S8 | DIAPH1 | rs74914207  | S24 | NA        | 1.37E-10 | 0.00558626  | 1.73E-07 | 9.12E-11 | 0.0037135   | 2.80E-07 |
| phe.Fasting_rs151204700S8 | DIAPH1 | rs75758702  | S24 | NA        | 7.02E-17 | 2.87E-09    | 3.16E-13 | 1.57E-10 | 0.00638323  | 4.59E-07 |
| phe.Fasting_rs151204700S8 | DIAPH1 | rs7763107   | S8  | FARS2     | 5.78E-16 | 2.36E-08    | 1.79E-12 | 9.23E-12 | 0.000375564 | 3.44E-08 |
| phe.Fasting_rs151204700S8 | DIAPH1 | rs77798597  | S7  | KPNA3     | 2.97E-15 | 1.21E-07    | 8.14E-12 | 1.09E-13 | 4.44E-06    | 6.79E-10 |
| phe.Fasting_rs151204700S8 | DIAPH1 | rs78516788  | S8  | SLC38A1   | 2.75E-11 | 0.00112269  | 3.94E-08 | 2.44E-10 | 0.00992686  | 6.74E-07 |
| phe.Fasting_rs151204700S8 | DIAPH1 | rs78736524  | S5  | KPNA3     | 2.97E-15 | 1.21E-07    | 8.14E-12 | 1.18E-13 | 4.80E-06    | 7.06E-10 |
| phe.Fasting_rs151204700S8 | DIAPH1 | rs79781495  | S8  | KPNA3     | 2.97E-15 | 1.21E-07    | 8.14E-12 | 1.09E-13 | 4.44E-06    | 6.79E-10 |
| phe.Fasting_rs151204700S8 | DIAPH1 | rs80332465  | S5  | KPNA3     | 3.13E-15 | 1.28E-07    | 8.51E-12 | 1.17E-13 | 4.77E-06    | 7.06E-10 |
| phe.Fasting_rs151204700S8 | DIAPH1 | rs80334773  | S5  | KPNA3     | 3.13E-15 | 1.28E-07    | 8.51E-12 | 1.17E-13 | 4.77E-06    | 7.06E-10 |
| phe.Fasting_rs151330468S8 | DIAPH1 | rs112089881 | S8  | ZFAND4    | 3.24E-18 | 1.32E-10    | 5.45E-14 | 2.00E-10 | 0.0081353   | 5.68E-07 |
| phe.Fasting_rs151330468S8 | DIAPH1 | rs115787552 | S5  | KPNA3     | 5.05E-16 | 2.06E-08    | 1.59E-12 | 2.49E-14 | 1.01E-06    | 1.89E-10 |
| phe.Fasting_rs151330468S8 | DIAPH1 | rs115888477 | S8  | NA        | 3.68E-15 | 1.50E-07    | 9.90E-12 | 4.39E-15 | 1.79E-07    | 4.08E-11 |
| phe.Fasting_rs151330468S8 | DIAPH1 | rs116011837 | S9  | BRD2      | 9.60E-12 | 0.000392176 | 1.53E-08 | 9.42E-15 | 3.84E-07    | 8.18E-11 |
| phe.Fasting_rs151330468S8 | DIAPH1 | rs116079984 | S8  | KPNA3     | 5.05E-16 | 2.06E-08    | 1.59E-12 | 2.73E-14 | 1.11E-06    | 2.06E-10 |
| phe.Fasting_rs151330468S8 | DIAPH1 | rs116120727 | S9  | BRD2      | 9.60E-12 | 0.000392176 | 1.53E-08 | 9.42E-15 | 3.84E-07    | 8.18E-11 |
| phe.Fasting_rs151330468S8 | DIAPH1 | rs116548615 | S8  | TMEM45B   | 2.95E-17 | 1.21E-09    | 1.69E-13 | 1.84E-12 | 7.48E-05    | 8.04E-09 |
| phe.Fasting_rs151330468S8 | DIAPH1 | rs146815317 | S5  | KPNA3     | 5.05E-16 | 2.06E-08    | 1.59E-12 | 2.49E-14 | 1.01E-06    | 1.89E-10 |
| phe.Fasting_rs151330468S8 | DIAPH1 | rs150117838 | S8  | KPNA3     | 5.05E-16 | 2.06E-08    | 1.59E-12 | 2.30E-14 | 9.36E-07    | 1.79E-10 |
| phe.Fasting_rs151330468S8 | DIAPH1 | rs16894241  | S4  | HIST1H2BK | 3.73E-12 | 0.000152384 | 6.73E-09 | 7.18E-15 | 2.92E-07    | 6.39E-11 |
| phe.Fasting_rs151330468S8 | DIAPH1 | rs57503635  | S3  | NA        | 1.28E-16 | 5.23E-09    | 5.19E-13 | 7.18E-15 | 2.92E-07    | 6.39E-11 |
| phe.Fasting_rs151330468S8 | DIAPH1 | rs7256517   | S7  | CYTH2     | 1.59E-16 | 6.48E-09    | 6.03E-13 | 1.01E-12 | 4.13E-05    | 4.74E-09 |
| phe.Fasting_rs151330468S8 | DIAPH1 | rs73392640  | S8  | POLR3B    | 4.58E-11 | 0.00187102  | 6.24E-08 | 1.10E-11 | 0.000446024 | 4.04E-08 |
| phe.Fasting_rs151330468S8 | DIAPH1 | rs74914207  | S24 | NA        | 2.89E-11 | 0.00117833  | 4.13E-08 | 1.71E-11 | 0.000696754 | 6.13E-08 |
| phe.Fasting_rs151330468S8 | DIAPH1 | rs75758702  | S24 | NA        | 1.04E-17 | 4.25E-10    | 9.89E-14 | 2.90E-11 | 0.00117848  | 9.92E-08 |
| phe.Fasting_rs151330468S8 | DIAPH1 | rs7763107   | S8  | FARS2     | 9.44E-17 | 3.86E-09    | 4.06E-13 | 1.67E-12 | 6.82E-05    | 7.43E-09 |
| phe.Fasting_rs151330468S8 | DIAPH1 | rs77798597  | S7  | KPNA3     | 5.05E-16 | 2.06E-08    | 1.59E-12 | 2.30E-14 | 9.36E-07    | 1.79E-10 |
| phe.Fasting_rs151330468S8 | DIAPH1 | rs78697063  | S5  | MSI2      | 7.77E-20 | 3.17E-12    | 2.23E-14 | 1.49E-10 | 0.00608249  | 4.45E-07 |
| phe.Fasting_rs151330468S8 | DIAPH1 | rs78736524  | S5  | KPNA3     | 5.05E-16 | 2.06E-08    | 1.59E-12 | 2.49E-14 | 1.01E-06    | 1.89E-10 |
| phe.Fasting_rs151330468S8 | DIAPH1 | rs79781495  | S8  | KPNA3     | 5.05E-16 | 2.06E-08    | 1.59E-12 | 2.30E-14 | 9.36E-07    | 1.79E-10 |
| phe.Fasting_rs151330468S8 | DIAPH1 | rs80332465  | S5  | KPNA3     | 5.36E-16 | 2.19E-08    | 1.67E-12 | 2.47E-14 | 1.00E-06    | 1.88E-10 |
| phe.Fasting_rs151330468S8 | DIAPH1 | rs80334773  | S5  | KPNA3     | 5.36E-16 | 2.19E-08    | 1.67E-12 | 2.47E-14 | 1.00E-06    | 1.88E-10 |
| phe.Fasting_rs16833550    | MYO1B  | rs113357907 | S24 | ISL1      | 1.90E-17 | 7.77E-10    | 1.37E-13 | 1.45E-14 | 5.92E-07    | 1.23E-10 |
| phe.Fasting_rs16833550    | MYO1B  | rs141926074 | S8  | ATE1      | 3.10E-18 | 1.27E-10    | 5.31E-14 | 1.61E-11 | 0.000654267 | 5.76E-08 |
| phe.Fasting_rs16833550    | MYO1B  | rs6881310   | S23 | ISL1      | 1.28E-16 | 5.24E-09    | 5.19E-13 | 6.78E-12 | 0.000276007 | 2.61E-08 |
| phe.Fasting_rs16833550    | MYO1B  | rs75758702  | S24 | NA        | 1.75E-17 | 7.14E-10    | 1.30E-13 | 1.81E-11 | 0.00073509  | 6.44E-08 |
| phe.Fasting_rs16833550    | MYO1B  | rs77444916  | S23 | LOC642366 | 4.42E-17 | 1.80E-09    | 2.29E-13 | 1.38E-14 | 5.64E-07    | 1.17E-10 |
| phe.Fasting_rs16833550    | MYO1B  | rs80258830  | S24 | LOC642366 | 4.42E-17 | 1.80E-09    | 2.29E-13 | 1.38E-14 | 5.64E-07    | 1.17E-10 |

|                         |    |             |             |     |           |          |          |          |          |             |          |
|-------------------------|----|-------------|-------------|-----|-----------|----------|----------|----------|----------|-------------|----------|
| phe.Fasting_rs16833551  | S5 | MYO1B       | rs112089881 | S8  | ZFAND4    | 2.84E-17 | 1.16E-09 | 1.64E-13 | 6.33E-17 | 2.58E-09    | 4.34E-12 |
| phe.Fasting_rs16833551  | S5 | MYO1B       | rs113357907 | S24 | ISL1      | 9.39E-17 | 3.83E-09 | 4.04E-13 | 2.87E-14 | 1.17E-06    | 2.15E-10 |
| phe.Fasting_rs16833551  | S5 | MYO1B       | rs115787552 | S5  | KPNA3     | 3.52E-15 | 1.44E-07 | 9.50E-12 | 1.67E-14 | 6.81E-07    | 1.39E-10 |
| phe.Fasting_rs16833551  | S5 | MYO1B       | rs115888477 | S8  | NA        | 2.34E-14 | 9.54E-07 | 5.76E-11 | 2.76E-15 | 1.12E-07    | 2.68E-11 |
| phe.Fasting_rs16833551  | S5 | MYO1B       | rs116079984 | S8  | KPNA3     | 3.52E-15 | 1.44E-07 | 9.50E-12 | 1.99E-14 | 8.11E-07    | 1.60E-10 |
| phe.Fasting_rs16833551  | S5 | MYO1B       | rs141926074 | S8  | ATE1      | 1.61E-17 | 6.58E-10 | 1.23E-13 | 3.34E-11 | 0.00135974  | 1.12E-07 |
| phe.Fasting_rs16833551  | S5 | MYO1B       | rs146815317 | S5  | KPNA3     | 3.52E-15 | 1.44E-07 | 9.50E-12 | 1.67E-14 | 6.81E-07    | 1.39E-10 |
| phe.Fasting_rs16833551  | S5 | MYO1B       | rs150117838 | S8  | KPNA3     | 3.52E-15 | 1.44E-07 | 9.50E-12 | 1.60E-14 | 6.50E-07    | 1.34E-10 |
| phe.Fasting_rs16833551  | S5 | MYO1B       | rs6881310   | S23 | ISL1      | 6.19E-16 | 2.53E-08 | 1.91E-12 | 1.51E-11 | 0.000616514 | 5.45E-08 |
| phe.Fasting_rs16833551  | S5 | MYO1B       | rs75758702  | S24 | NA        | 8.46E-17 | 3.45E-09 | 3.69E-13 | 2.34E-11 | 0.000953298 | 8.15E-08 |
| phe.Fasting_rs16833551  | S5 | MYO1B       | rs77444916  | S23 | LOC642366 | 2.08E-16 | 8.50E-09 | 7.15E-13 | 2.73E-14 | 1.11E-06    | 2.06E-10 |
| phe.Fasting_rs16833551  | S5 | MYO1B       | rs77798597  | S7  | KPNA3     | 3.52E-15 | 1.44E-07 | 9.50E-12 | 1.60E-14 | 6.50E-07    | 1.34E-10 |
| phe.Fasting_rs16833551  | S5 | MYO1B       | rs78736524  | S5  | KPNA3     | 3.52E-15 | 1.44E-07 | 9.50E-12 | 1.67E-14 | 6.81E-07    | 1.39E-10 |
| phe.Fasting_rs16833551  | S5 | MYO1B       | rs79781495  | S8  | KPNA3     | 3.52E-15 | 1.44E-07 | 9.50E-12 | 1.60E-14 | 6.50E-07    | 1.34E-10 |
| phe.Fasting_rs16833551  | S5 | MYO1B       | rs80258830  | S24 | LOC642366 | 2.08E-16 | 8.50E-09 | 7.15E-13 | 2.73E-14 | 1.11E-06    | 2.06E-10 |
| phe.Fasting_rs16833551  | S5 | MYO1B       | rs80332465  | S5  | KPNA3     | 3.73E-15 | 1.52E-07 | 1.00E-11 | 1.71E-14 | 6.98E-07    | 1.41E-10 |
| phe.Fasting_rs16833551  | S5 | MYO1B       | rs80334773  | S5  | KPNA3     | 3.73E-15 | 1.52E-07 | 1.00E-11 | 1.71E-14 | 6.98E-07    | 1.41E-10 |
| phe.Fasting_rs16833579  | S8 | MYO1B       | rs113357907 | S24 | ISL1      | 2.24E-17 | 9.16E-10 | 1.45E-13 | 6.99E-15 | 2.84E-07    | 6.24E-11 |
| phe.Fasting_rs16833579  | S8 | MYO1B       | rs13400525  | S8  | MFF       | 2.10E-16 | 8.59E-09 | 7.21E-13 | 8.33E-11 | 0.0033917   | 2.59E-07 |
| phe.Fasting_rs16833579  | S8 | MYO1B       | rs141926074 | S8  | ATE1      | 6.12E-18 | 2.50E-10 | 7.50E-14 | 5.85E-12 | 0.000238277 | 2.28E-08 |
| phe.Fasting_rs16833579  | S8 | MYO1B       | rs6881310   | S23 | ISL1      | 1.58E-16 | 6.46E-09 | 6.03E-13 | 2.60E-12 | 0.000105734 | 1.11E-08 |
| phe.Fasting_rs16833579  | S8 | MYO1B       | rs73619637  | S8  | NA        | 3.32E-16 | 1.36E-08 | 1.10E-12 | 1.90E-11 | 0.000773524 | 6.76E-08 |
| phe.Fasting_rs16833579  | S8 | MYO1B       | rs77444916  | S23 | LOC642366 | 5.20E-17 | 2.12E-09 | 2.55E-13 | 6.64E-15 | 2.70E-07    | 5.95E-11 |
| phe.Fasting_rs16833579  | S8 | MYO1B       | rs80258830  | S24 | LOC642366 | 5.20E-17 | 2.12E-09 | 2.55E-13 | 6.64E-15 | 2.70E-07    | 5.95E-11 |
| phe.Fasting_rs16854875  | S2 | NA          | rs116011837 | S9  | BRD2      | 1.98E-13 | 8.09E-06 | 4.34E-10 | 5.72E-11 | 0.00233027  | 1.83E-07 |
| phe.Fasting_rs16854875  | S2 | NA          | rs116120727 | S9  | BRD2      | 1.98E-13 | 8.09E-06 | 4.34E-10 | 5.72E-11 | 0.00233027  | 1.83E-07 |
| phe.Fasting_rs16894241  | S4 | HIST1H2BK   | rs114565620 | S8  | RCL1      | 1.14E-17 | 4.64E-10 | 1.02E-13 | 8.75E-16 | 3.56E-08    | 1.16E-11 |
| phe.Fasting_rs16894241  | S4 | HIST1H2BK   | rs115787552 | S5  | KPNA3     | 2.62E-16 | 1.07E-08 | 8.83E-13 | 1.86E-11 | 0.000758335 | 6.63E-08 |
| phe.Fasting_rs16894241  | S4 | HIST1H2BK   | rs116079984 | S8  | KPNA3     | 2.62E-16 | 1.07E-08 | 8.83E-13 | 2.30E-11 | 0.000937424 | 8.01E-08 |
| phe.Fasting_rs16894241  | S4 | HIST1H2BK   | rs146815317 | S5  | KPNA3     | 2.62E-16 | 1.07E-08 | 8.83E-13 | 1.86E-11 | 0.000758335 | 6.63E-08 |
| phe.Fasting_rs16894241  | S4 | HIST1H2BK   | rs150117838 | S8  | KPNA3     | 2.62E-16 | 1.07E-08 | 8.83E-13 | 1.77E-11 | 0.000720971 | 6.32E-08 |
| phe.Fasting_rs16894241  | S4 | HIST1H2BK   | rs75350765  | S5  | RCL1      | 1.14E-17 | 4.64E-10 | 1.02E-13 | 8.75E-16 | 3.56E-08    | 1.16E-11 |
| phe.Fasting_rs16894241  | S4 | HIST1H2BK   | rs77798597  | S7  | KPNA3     | 2.62E-16 | 1.07E-08 | 8.83E-13 | 1.77E-11 | 0.000720971 | 6.32E-08 |
| phe.Fasting_rs16894241  | S4 | HIST1H2BK   | rs78736524  | S5  | KPNA3     | 2.62E-16 | 1.07E-08 | 8.83E-13 | 1.86E-11 | 0.000758335 | 6.63E-08 |
| phe.Fasting_rs16894241  | S4 | HIST1H2BK   | rs79781495  | S8  | KPNA3     | 2.62E-16 | 1.07E-08 | 8.83E-13 | 1.77E-11 | 0.000720971 | 6.32E-08 |
| phe.Fasting_rs16894241  | S4 | HIST1H2BK   | rs80332465  | S5  | KPNA3     | 2.79E-16 | 1.14E-08 | 9.36E-13 | 1.87E-11 | 0.000761502 | 6.66E-08 |
| phe.Fasting_rs16894241  | S4 | HIST1H2BK   | rs80334773  | S5  | KPNA3     | 2.79E-16 | 1.14E-08 | 9.36E-13 | 1.77E-11 | 0.000761502 | 6.66E-08 |
| phe.Fasting_rs17236830  | S6 | PHC3        | rs116011837 | S9  | BRD2      | 5.40E-13 | 2.21E-05 | 1.14E-09 | 2.69E-11 | 0.00109333  | 9.25E-08 |
| phe.Fasting_rs17236830  | S6 | PHC3        | rs116120727 | S9  | BRD2      | 5.40E-13 | 2.21E-05 | 1.14E-09 | 2.69E-11 | 0.00109333  | 9.25E-08 |
| phe.Fasting_rs180772028 | S8 | "DIAPH1,LOC | rs115787552 | S5  | KPNA3     | 2.97E-15 | 1.21E-07 | 8.14E-12 | 1.18E-13 | 4.80E-06    | 7.06E-10 |

|              |             |    |                        |             |           |           |             |             |          |             |             |          |
|--------------|-------------|----|------------------------|-------------|-----------|-----------|-------------|-------------|----------|-------------|-------------|----------|
| phe.Fasting_ | rs180772028 | S8 | "DIAPH1,LOCrs115888477 | S8          | NA        | 2.03E-14  | 8.28E-07    | 5.02E-11    | 2.21E-14 | 8.99E-07    | 1.73E-10    |          |
| phe.Fasting_ | rs180772028 | S8 | "DIAPH1,LOCrs116011837 | S9          | BRD2      | 4.89E-11  | 0.00199774  | 6.62E-08    | 4.07E-14 | 1.66E-06    | 2.85E-10    |          |
| phe.Fasting_ | rs180772028 | S8 | "DIAPH1,LOCrs116079984 | S8          | KPNA3     | 2.97E-15  | 1.21E-07    | 8.14E-12    | 1.24E-13 | 5.04E-06    | 7.34E-10    |          |
| phe.Fasting_ | rs180772028 | S8 | "DIAPH1,LOCrs116120727 | S9          | BRD2      | 4.89E-11  | 0.00199774  | 6.62E-08    | 4.07E-14 | 1.66E-06    | 2.85E-10    |          |
| phe.Fasting_ | rs180772028 | S8 | "DIAPH1,LOCrs116548615 | S8          | TMEM45B   | 1.73E-16  | 7.06E-09    | 6.15E-13    | 8.70E-12 | 0.000354153 | 3.26E-08    |          |
| phe.Fasting_ | rs180772028 | S8 | "DIAPH1,LOCrs146815317 | S5          | KPNA3     | 2.97E-15  | 1.21E-07    | 8.14E-12    | 1.18E-13 | 4.80E-06    | 7.06E-10    |          |
| phe.Fasting_ | rs180772028 | S8 | "DIAPH1,LOCrs150117838 | S8          | KPNA3     | 2.97E-15  | 1.21E-07    | 8.14E-12    | 1.09E-13 | 4.44E-06    | 6.79E-10    |          |
| phe.Fasting_ | rs180772028 | S8 | "DIAPH1,LOCrs16894241  | S4          | HIST1H2BK | 1.99E-11  | 0.000812315 | 2.96E-08    | 3.44E-14 | 1.40E-06    | 2.50E-10    |          |
| phe.Fasting_ | rs180772028 | S8 | "DIAPH1,LOCrs57503635  | S3          | NA        | 6.34E-16  | 2.59E-08    | 1.95E-12    | 3.17E-14 | 1.29E-06    | 2.34E-10    |          |
| phe.Fasting_ | rs180772028 | S8 | "DIAPH1,LOCrs7256517   | S7          | CYTH2     | 1.04E-15  | 4.24E-08    | 3.06E-12    | 4.82E-12 | 0.000196022 | 1.91E-08    |          |
| phe.Fasting_ | rs180772028 | S8 | "DIAPH1,LOCrs73392640  | S8          | POLR3B    | 2.02E-10  | 0.00826001  | 2.49E-07    | 5.19E-11 | 0.00211214  | 1.67E-07    |          |
| phe.Fasting_ | rs180772028 | S8 | "DIAPH1,LOCrs73619637  | S8          | NA        | 1.44E-15  | 5.89E-08    | 4.14E-12    | 2.05E-10 | 0.00833668  | 5.78E-07    |          |
| phe.Fasting_ | rs180772028 | S8 | "DIAPH1,LOCrs74914207  | S24         | NA        | 1.37E-10  | 0.00558626  | 1.73E-07    | 9.12E-11 | 0.0037135   | 2.80E-07    |          |
| phe.Fasting_ | rs180772028 | S8 | "DIAPH1,LOCrs75758702  | S24         | NA        | 7.02E-17  | 2.87E-09    | 3.16E-13    | 1.57E-10 | 0.00638323  | 4.59E-07    |          |
| phe.Fasting_ | rs180772028 | S8 | "DIAPH1,LOCrs7763107   | S8          | FARS2     | 5.78E-16  | 2.36E-08    | 1.79E-12    | 9.23E-12 | 0.000375564 | 3.44E-08    |          |
| phe.Fasting_ | rs180772028 | S8 | "DIAPH1,LOCrs77798597  | S7          | KPNA3     | 2.97E-15  | 1.21E-07    | 8.14E-12    | 1.09E-13 | 4.44E-06    | 6.79E-10    |          |
| phe.Fasting_ | rs180772028 | S8 | "DIAPH1,LOCrs78516788  | S8          | SLC38A1   | 2.75E-11  | 0.00112269  | 3.94E-08    | 2.44E-10 | 0.00992686  | 6.74E-07    |          |
| phe.Fasting_ | rs180772028 | S8 | "DIAPH1,LOCrs78736524  | S5          | KPNA3     | 2.97E-15  | 1.21E-07    | 8.14E-12    | 1.18E-13 | 4.80E-06    | 7.06E-10    |          |
| phe.Fasting_ | rs180772028 | S8 | "DIAPH1,LOCrs79781495  | S8          | KPNA3     | 2.97E-15  | 1.21E-07    | 8.14E-12    | 1.09E-13 | 4.44E-06    | 6.79E-10    |          |
| phe.Fasting_ | rs180772028 | S8 | "DIAPH1,LOCrs80332465  | S5          | KPNA3     | 3.13E-15  | 1.28E-07    | 8.51E-12    | 1.17E-13 | 4.77E-06    | 7.06E-10    |          |
| phe.Fasting_ | rs180772028 | S8 | "DIAPH1,LOCrs80334773  | S5          | KPNA3     | 3.13E-15  | 1.28E-07    | 8.51E-12    | 1.17E-13 | 4.77E-06    | 7.06E-10    |          |
| phe.Fasting_ | rs181224861 | S7 | DIAPH1                 | rs115787552 | S5        | KPNA3     | 2.97E-15    | 1.21E-07    | 8.14E-12 | 1.18E-13    | 4.80E-06    | 7.06E-10 |
| phe.Fasting_ | rs181224861 | S7 | DIAPH1                 | rs115888477 | S8        | NA        | 2.03E-14    | 8.28E-07    | 5.02E-11 | 2.21E-14    | 8.99E-07    | 1.73E-10 |
| phe.Fasting_ | rs181224861 | S7 | DIAPH1                 | rs116011837 | S9        | BRD2      | 4.89E-11    | 0.00199774  | 6.62E-08 | 4.07E-14    | 1.66E-06    | 2.85E-10 |
| phe.Fasting_ | rs181224861 | S7 | DIAPH1                 | rs116079984 | S8        | KPNA3     | 2.97E-15    | 1.21E-07    | 8.14E-12 | 1.24E-13    | 5.04E-06    | 7.34E-10 |
| phe.Fasting_ | rs181224861 | S7 | DIAPH1                 | rs116120727 | S9        | BRD2      | 4.89E-11    | 0.00199774  | 6.62E-08 | 4.07E-14    | 1.66E-06    | 2.85E-10 |
| phe.Fasting_ | rs181224861 | S7 | DIAPH1                 | rs116548615 | S8        | TMEM45B   | 1.73E-16    | 7.06E-09    | 6.15E-13 | 8.70E-12    | 0.000354153 | 3.26E-08 |
| phe.Fasting_ | rs181224861 | S7 | DIAPH1                 | rs146815317 | S5        | KPNA3     | 2.97E-15    | 1.21E-07    | 8.14E-12 | 1.18E-13    | 4.80E-06    | 7.06E-10 |
| phe.Fasting_ | rs181224861 | S7 | DIAPH1                 | rs150117838 | S8        | KPNA3     | 2.97E-15    | 1.21E-07    | 8.14E-12 | 1.09E-13    | 4.44E-06    | 6.79E-10 |
| phe.Fasting_ | rs181224861 | S7 | DIAPH1                 | rs16894241  | S4        | HIST1H2BK | 1.99E-11    | 0.000812315 | 2.96E-08 | 3.44E-14    | 1.40E-06    | 2.50E-10 |
| phe.Fasting_ | rs181224861 | S7 | DIAPH1                 | rs57503635  | S3        | NA        | 6.34E-16    | 2.59E-08    | 1.95E-12 | 3.17E-14    | 1.29E-06    | 2.34E-10 |
| phe.Fasting_ | rs181224861 | S7 | DIAPH1                 | rs7256517   | S7        | CYTH2     | 1.04E-15    | 4.24E-08    | 3.06E-12 | 4.82E-12    | 0.000196022 | 1.91E-08 |
| phe.Fasting_ | rs181224861 | S7 | DIAPH1                 | rs73392640  | S8        | POLR3B    | 2.02E-10    | 0.00826001  | 2.49E-07 | 5.19E-11    | 0.00211214  | 1.67E-07 |
| phe.Fasting_ | rs181224861 | S7 | DIAPH1                 | rs73619637  | S8        | NA        | 1.44E-15    | 5.89E-08    | 4.14E-12 | 2.05E-10    | 0.00833668  | 5.78E-07 |
| phe.Fasting_ | rs181224861 | S7 | DIAPH1                 | rs74914207  | S24       | NA        | 1.37E-10    | 0.00558626  | 1.73E-07 | 9.12E-11    | 0.0037135   | 2.80E-07 |
| phe.Fasting_ | rs181224861 | S7 | DIAPH1                 | rs75758702  | S24       | NA        | 7.02E-17    | 2.87E-09    | 3.16E-13 | 1.57E-10    | 0.00638323  | 4.59E-07 |
| phe.Fasting_ | rs181224861 | S7 | DIAPH1                 | rs7763107   | S8        | FARS2     | 5.78E-16    | 2.36E-08    | 1.79E-12 | 9.23E-12    | 0.000375564 | 3.44E-08 |
| phe.Fasting_ | rs181224861 | S7 | DIAPH1                 | rs77798597  | S7        | KPNA3     | 2.97E-15    | 1.21E-07    | 8.14E-12 | 1.09E-13    | 4.44E-06    | 6.79E-10 |
| phe.Fasting_ | rs181224861 | S7 | DIAPH1                 | rs78516788  | S8        | SLC38A1   | 2.75E-11    | 0.00112269  | 3.94E-08 | 2.44E-10    | 0.00992686  | 6.74E-07 |
| phe.Fasting_ | rs181224861 | S7 | DIAPH1                 | rs78736524  | S5        | KPNA3     | 2.97E-15    | 1.21E-07    | 8.14E-12 | 1.18E-13    | 4.80E-06    | 7.06E-10 |

|              |             |     |           |              |     |           |          |             |          |          |             |          |
|--------------|-------------|-----|-----------|--------------|-----|-----------|----------|-------------|----------|----------|-------------|----------|
| phe.Fasting_ | rs181224861 | S7  | DIAPH1    | rs79781495   | S8  | KPNA3     | 2.97E-15 | 1.21E-07    | 8.14E-12 | 1.09E-13 | 4.44E-06    | 6.79E-10 |
| phe.Fasting_ | rs181224861 | S7  | DIAPH1    | rs80332465   | S5  | KPNA3     | 3.13E-15 | 1.28E-07    | 8.51E-12 | 1.17E-13 | 4.77E-06    | 7.06E-10 |
| phe.Fasting_ | rs181224861 | S7  | DIAPH1    | rs80334773   | S5  | KPNA3     | 3.13E-15 | 1.28E-07    | 8.51E-12 | 1.17E-13 | 4.77E-06    | 7.06E-10 |
| phe.Fasting_ | rs181247960 | S21 | "PCDHGA9, | Prs115787552 | S5  | KPNA3     | 3.78E-16 | 1.54E-08    | 1.23E-12 | 4.20E-14 | 1.71E-06    | 2.93E-10 |
| phe.Fasting_ | rs181247960 | S21 | "PCDHGA9, | Prs115888477 | S8  | NA        | 2.72E-15 | 1.11E-07    | 7.62E-12 | 7.36E-15 | 3.00E-07    | 6.53E-11 |
| phe.Fasting_ | rs181247960 | S21 | "PCDHGA9, | Prs116079984 | S8  | KPNA3     | 3.78E-16 | 1.54E-08    | 1.23E-12 | 4.48E-14 | 1.82E-06    | 3.11E-10 |
| phe.Fasting_ | rs181247960 | S21 | "PCDHGA9, | Prs116548615 | S8  | TMEM45B   | 2.04E-17 | 8.34E-10    | 1.43E-13 | 7.86E-12 | 0.000320069 | 2.98E-08 |
| phe.Fasting_ | rs181247960 | S21 | "PCDHGA9, | Prs146815317 | S5  | KPNA3     | 3.78E-16 | 1.54E-08    | 1.23E-12 | 4.20E-14 | 1.71E-06    | 2.93E-10 |
| phe.Fasting_ | rs181247960 | S21 | "PCDHGA9, | Prs150117838 | S8  | KPNA3     | 3.78E-16 | 1.54E-08    | 1.23E-12 | 3.89E-14 | 1.58E-06    | 2.77E-10 |
| phe.Fasting_ | rs181247960 | S21 | "PCDHGA9, | Prs77798597  | S7  | KPNA3     | 3.78E-16 | 1.54E-08    | 1.23E-12 | 3.89E-14 | 1.58E-06    | 2.77E-10 |
| phe.Fasting_ | rs181247960 | S21 | "PCDHGA9, | Prs78736524  | S5  | KPNA3     | 3.78E-16 | 1.54E-08    | 1.23E-12 | 4.20E-14 | 1.71E-06    | 2.93E-10 |
| phe.Fasting_ | rs181247960 | S21 | "PCDHGA9, | Prs79781495  | S8  | KPNA3     | 3.78E-16 | 1.54E-08    | 1.23E-12 | 3.89E-14 | 1.58E-06    | 2.77E-10 |
| phe.Fasting_ | rs181247960 | S21 | "PCDHGA9, | Prs80332465  | S5  | KPNA3     | 4.04E-16 | 1.65E-08    | 1.31E-12 | 4.20E-14 | 1.71E-06    | 2.93E-10 |
| phe.Fasting_ | rs181247960 | S21 | "PCDHGA9, | Prs80334773  | S5  | KPNA3     | 4.04E-16 | 1.65E-08    | 1.31E-12 | 4.20E-14 | 1.71E-06    | 2.93E-10 |
| phe.Fasting_ | rs181824655 | S21 | "PCDHGB6, | Prs115787552 | S5  | KPNA3     | 3.78E-16 | 1.54E-08    | 1.23E-12 | 4.20E-14 | 1.71E-06    | 2.93E-10 |
| phe.Fasting_ | rs181824655 | S21 | "PCDHGB6, | Prs115888477 | S8  | NA        | 2.72E-15 | 1.11E-07    | 7.62E-12 | 7.36E-15 | 3.00E-07    | 6.53E-11 |
| phe.Fasting_ | rs181824655 | S21 | "PCDHGB6, | Prs116079984 | S8  | KPNA3     | 3.78E-16 | 1.54E-08    | 1.23E-12 | 4.48E-14 | 1.82E-06    | 3.11E-10 |
| phe.Fasting_ | rs181824655 | S21 | "PCDHGB6, | Prs116548615 | S8  | TMEM45B   | 2.04E-17 | 8.34E-10    | 1.43E-13 | 7.86E-12 | 0.000320069 | 2.98E-08 |
| phe.Fasting_ | rs181824655 | S21 | "PCDHGB6, | Prs146815317 | S5  | KPNA3     | 3.78E-16 | 1.54E-08    | 1.23E-12 | 4.20E-14 | 1.71E-06    | 2.93E-10 |
| phe.Fasting_ | rs181824655 | S21 | "PCDHGB6, | Prs150117838 | S8  | KPNA3     | 3.78E-16 | 1.54E-08    | 1.23E-12 | 3.89E-14 | 1.58E-06    | 2.77E-10 |
| phe.Fasting_ | rs181824655 | S21 | "PCDHGB6, | Prs77798597  | S7  | KPNA3     | 3.78E-16 | 1.54E-08    | 1.23E-12 | 3.89E-14 | 1.58E-06    | 2.77E-10 |
| phe.Fasting_ | rs181824655 | S21 | "PCDHGB6, | Prs78736524  | S5  | KPNA3     | 3.78E-16 | 1.54E-08    | 1.23E-12 | 4.20E-14 | 1.71E-06    | 2.93E-10 |
| phe.Fasting_ | rs181824655 | S21 | "PCDHGB6, | Prs79781495  | S8  | KPNA3     | 3.78E-16 | 1.54E-08    | 1.23E-12 | 3.89E-14 | 1.58E-06    | 2.77E-10 |
| phe.Fasting_ | rs181824655 | S21 | "PCDHGB6, | Prs80332465  | S5  | KPNA3     | 4.04E-16 | 1.65E-08    | 1.31E-12 | 4.20E-14 | 1.71E-06    | 2.93E-10 |
| phe.Fasting_ | rs181824655 | S21 | "PCDHGB6, | Prs80334773  | S5  | KPNA3     | 4.04E-16 | 1.65E-08    | 1.31E-12 | 4.20E-14 | 1.71E-06    | 2.93E-10 |
| phe.Fasting_ | rs182714699 | S8  | DIAPH1    | rs115787552  | S5  | KPNA3     | 2.97E-15 | 1.21E-07    | 8.14E-12 | 1.18E-13 | 4.80E-06    | 7.06E-10 |
| phe.Fasting_ | rs182714699 | S8  | DIAPH1    | rs115888477  | S8  | NA        | 2.03E-14 | 8.28E-07    | 5.02E-11 | 2.21E-14 | 8.99E-07    | 1.73E-10 |
| phe.Fasting_ | rs182714699 | S8  | DIAPH1    | rs116011837  | S9  | BRD2      | 4.89E-11 | 0.00199774  | 6.62E-08 | 4.07E-14 | 1.66E-06    | 2.85E-10 |
| phe.Fasting_ | rs182714699 | S8  | DIAPH1    | rs116079984  | S8  | KPNA3     | 2.97E-15 | 1.21E-07    | 8.14E-12 | 1.24E-13 | 5.04E-06    | 7.34E-10 |
| phe.Fasting_ | rs182714699 | S8  | DIAPH1    | rs116120727  | S9  | BRD2      | 4.89E-11 | 0.00199774  | 6.62E-08 | 4.07E-14 | 1.66E-06    | 2.85E-10 |
| phe.Fasting_ | rs182714699 | S8  | DIAPH1    | rs116548615  | S8  | TMEM45B   | 1.73E-16 | 7.06E-09    | 6.15E-13 | 8.70E-12 | 0.000354153 | 3.26E-08 |
| phe.Fasting_ | rs182714699 | S8  | DIAPH1    | rs146815317  | S5  | KPNA3     | 2.97E-15 | 1.21E-07    | 8.14E-12 | 1.18E-13 | 4.80E-06    | 7.06E-10 |
| phe.Fasting_ | rs182714699 | S8  | DIAPH1    | rs150117838  | S8  | KPNA3     | 2.97E-15 | 1.21E-07    | 8.14E-12 | 1.09E-13 | 4.44E-06    | 6.79E-10 |
| phe.Fasting_ | rs182714699 | S8  | DIAPH1    | rs16894241   | S4  | HIST1H2BK | 1.99E-11 | 0.000812315 | 2.96E-08 | 3.44E-14 | 1.40E-06    | 2.50E-10 |
| phe.Fasting_ | rs182714699 | S8  | DIAPH1    | rs57503635   | S3  | NA        | 6.34E-16 | 2.59E-08    | 1.95E-12 | 3.17E-14 | 1.29E-06    | 2.34E-10 |
| phe.Fasting_ | rs182714699 | S8  | DIAPH1    | rs7256517    | S7  | CYTH2     | 1.04E-15 | 4.24E-08    | 3.06E-12 | 4.82E-12 | 0.000196022 | 1.91E-08 |
| phe.Fasting_ | rs182714699 | S8  | DIAPH1    | rs73392640   | S8  | POLR3B    | 2.02E-10 | 0.00826001  | 2.49E-07 | 5.19E-11 | 0.00211214  | 1.67E-07 |
| phe.Fasting_ | rs182714699 | S8  | DIAPH1    | rs73619637   | S8  | NA        | 1.44E-15 | 5.89E-08    | 4.14E-12 | 2.05E-10 | 0.00833668  | 5.78E-07 |
| phe.Fasting_ | rs182714699 | S8  | DIAPH1    | rs74914207   | S24 | NA        | 1.37E-10 | 0.00558626  | 1.73E-07 | 9.12E-11 | 0.0037135   | 2.80E-07 |
| phe.Fasting_ | rs182714699 | S8  | DIAPH1    | rs75758702   | S24 | NA        | 7.02E-17 | 2.87E-09    | 3.16E-13 | 1.57E-10 | 0.00638323  | 4.59E-07 |

|                           |        |               |     |           |          |             |          |          |             |          |
|---------------------------|--------|---------------|-----|-----------|----------|-------------|----------|----------|-------------|----------|
| phe.Fasting_rs182714699S8 | DIAPH1 | rs7763107     | S8  | FARS2     | 5.78E-16 | 2.36E-08    | 1.79E-12 | 9.23E-12 | 0.000375564 | 3.44E-08 |
| phe.Fasting_rs182714699S8 | DIAPH1 | rs77798597    | S7  | KPNA3     | 2.97E-15 | 1.21E-07    | 8.14E-12 | 1.09E-13 | 4.44E-06    | 6.79E-10 |
| phe.Fasting_rs182714699S8 | DIAPH1 | rs78516788    | S8  | SLC38A1   | 2.75E-11 | 0.00112269  | 3.94E-08 | 2.44E-10 | 0.00992686  | 6.74E-07 |
| phe.Fasting_rs182714699S8 | DIAPH1 | rs78736524    | S5  | KPNA3     | 2.97E-15 | 1.21E-07    | 8.14E-12 | 1.18E-13 | 4.80E-06    | 7.06E-10 |
| phe.Fasting_rs182714699S8 | DIAPH1 | rs79781495    | S8  | KPNA3     | 2.97E-15 | 1.21E-07    | 8.14E-12 | 1.09E-13 | 4.44E-06    | 6.79E-10 |
| phe.Fasting_rs182714699S8 | DIAPH1 | rs80332465    | S5  | KPNA3     | 3.13E-15 | 1.28E-07    | 8.51E-12 | 1.17E-13 | 4.77E-06    | 7.06E-10 |
| phe.Fasting_rs182714699S8 | DIAPH1 | rs80334773    | S5  | KPNA3     | 3.13E-15 | 1.28E-07    | 8.51E-12 | 1.17E-13 | 4.77E-06    | 7.06E-10 |
| phe.Fasting_rs182958142S8 | DIAPH1 | rs116011837S9 |     | BRD2      | 4.39E-11 | 0.00179086  | 5.99E-08 | 2.32E-14 | 9.45E-07    | 1.79E-10 |
| phe.Fasting_rs182958142S8 | DIAPH1 | rs116079984S8 |     | KPNA3     | 1.65E-15 | 6.72E-08    | 4.71E-12 | 1.63E-10 | 0.00662252  | 4.74E-07 |
| phe.Fasting_rs182958142S8 | DIAPH1 | rs116120727S9 |     | BRD2      | 4.39E-11 | 0.00179086  | 5.99E-08 | 2.32E-14 | 9.45E-07    | 1.79E-10 |
| phe.Fasting_rs182958142S8 | DIAPH1 | rs116548615S8 |     | TMEM45B   | 8.54E-17 | 3.49E-09    | 3.71E-13 | 5.83E-13 | 2.37E-05    | 2.88E-09 |
| phe.Fasting_rs182958142S8 | DIAPH1 | rs16894241    | S4  | HIST1H2BK | 1.70E-11 | 0.000696087 | 2.59E-08 | 3.83E-15 | 1.56E-07    | 3.60E-11 |
| phe.Fasting_rs182958142S8 | DIAPH1 | rs57503635    | S3  | NA        | 3.25E-16 | 1.33E-08    | 1.08E-12 | 2.33E-15 | 9.50E-08    | 2.30E-11 |
| phe.Fasting_rs182958142S8 | DIAPH1 | rs7256517     | S7  | CYTH2     | 7.73E-16 | 3.15E-08    | 2.35E-12 | 1.59E-10 | 0.00645569  | 4.63E-07 |
| phe.Fasting_rs182965141S8 | DIAPH1 | rs112089881S8 |     | ZFAND4    | 4.45E-18 | 1.82E-10    | 6.40E-14 | 4.37E-11 | 0.00177999  | 1.43E-07 |
| phe.Fasting_rs182965141S8 | DIAPH1 | rs115787552S5 |     | KPNA3     | 6.69E-16 | 2.73E-08    | 2.05E-12 | 5.19E-15 | 2.11E-07    | 4.77E-11 |
| phe.Fasting_rs182965141S8 | DIAPH1 | rs115888477S8 |     | NA        | 4.74E-15 | 1.94E-07    | 1.24E-11 | 8.30E-16 | 3.38E-08    | 1.16E-11 |
| phe.Fasting_rs182965141S8 | DIAPH1 | rs116011837S9 |     | BRD2      | 1.24E-11 | 0.000507427 | 1.94E-08 | 1.84E-15 | 7.47E-08    | 2.00E-11 |
| phe.Fasting_rs182965141S8 | DIAPH1 | rs116079984S8 |     | KPNA3     | 6.69E-16 | 2.73E-08    | 2.05E-12 | 5.75E-15 | 2.34E-07    | 5.25E-11 |
| phe.Fasting_rs182965141S8 | DIAPH1 | rs116120727S9 |     | BRD2      | 1.24E-11 | 0.000507427 | 1.94E-08 | 1.84E-15 | 7.47E-08    | 2.00E-11 |
| phe.Fasting_rs182965141S8 | DIAPH1 | rs116548615S8 |     | TMEM45B   | 4.49E-17 | 1.83E-09    | 2.29E-13 | 3.95E-13 | 1.61E-05    | 2.13E-09 |
| phe.Fasting_rs182965141S8 | DIAPH1 | rs146815317S5 |     | KPNA3     | 6.69E-16 | 2.73E-08    | 2.05E-12 | 5.19E-15 | 2.11E-07    | 4.77E-11 |
| phe.Fasting_rs182965141S8 | DIAPH1 | rs150117838S8 |     | KPNA3     | 6.69E-16 | 2.73E-08    | 2.05E-12 | 4.80E-15 | 1.95E-07    | 4.44E-11 |
| phe.Fasting_rs182965141S8 | DIAPH1 | rs16894241    | S4  | HIST1H2BK | 5.06E-12 | 0.000206577 | 9.00E-09 | 1.66E-15 | 6.76E-08    | 1.84E-11 |
| phe.Fasting_rs182965141S8 | DIAPH1 | rs57503635    | S3  | NA        | 1.66E-16 | 6.79E-09    | 6.03E-13 | 2.32E-15 | 9.45E-08    | 2.29E-11 |
| phe.Fasting_rs182965141S8 | DIAPH1 | rs7256517     | S7  | CYTH2     | 2.17E-16 | 8.84E-09    | 7.40E-13 | 2.24E-13 | 9.10E-06    | 1.24E-09 |
| phe.Fasting_rs182965141S8 | DIAPH1 | rs73392640    | S8  | POLR3B    | 5.86E-11 | 0.00239099  | 7.87E-08 | 1.80E-12 | 7.33E-05    | 7.89E-09 |
| phe.Fasting_rs182965141S8 | DIAPH1 | rs74914207    | S24 | NA        | 3.56E-11 | 0.00145284  | 4.96E-08 | 4.17E-12 | 0.000169874 | 1.68E-08 |
| phe.Fasting_rs182965141S8 | DIAPH1 | rs75758702    | S24 | NA        | 3.26E-17 | 1.33E-09    | 1.82E-13 | 2.96E-12 | 0.0001205   | 1.26E-08 |
| phe.Fasting_rs182965141S8 | DIAPH1 | rs7763107     | S8  | FARS2     | 1.61E-16 | 6.58E-09    | 6.03E-13 | 3.34E-13 | 1.36E-05    | 1.81E-09 |
| phe.Fasting_rs182965141S8 | DIAPH1 | rs77798597    | S7  | KPNA3     | 6.69E-16 | 2.73E-08    | 2.05E-12 | 4.80E-15 | 1.95E-07    | 4.44E-11 |
| phe.Fasting_rs182965141S8 | DIAPH1 | rs78736524    | S5  | KPNA3     | 6.69E-16 | 2.73E-08    | 2.05E-12 | 5.19E-15 | 2.11E-07    | 4.77E-11 |
| phe.Fasting_rs182965141S8 | DIAPH1 | rs79781495    | S8  | KPNA3     | 6.69E-16 | 2.73E-08    | 2.05E-12 | 4.80E-15 | 1.95E-07    | 4.44E-11 |
| phe.Fasting_rs182965141S8 | DIAPH1 | rs80332465    | S5  | KPNA3     | 7.09E-16 | 2.89E-08    | 2.17E-12 | 5.17E-15 | 2.10E-07    | 4.75E-11 |
| phe.Fasting_rs182965141S8 | DIAPH1 | rs80334773    | S5  | KPNA3     | 7.09E-16 | 2.89E-08    | 2.17E-12 | 5.17E-15 | 2.10E-07    | 4.75E-11 |
| phe.Fasting_rs183597049S7 | DIAPH1 | rs115787552S5 |     | KPNA3     | 2.97E-15 | 1.21E-07    | 8.14E-12 | 1.18E-13 | 4.80E-06    | 7.06E-10 |
| phe.Fasting_rs183597049S7 | DIAPH1 | rs115888477S8 |     | NA        | 2.03E-14 | 8.28E-07    | 5.02E-11 | 2.21E-14 | 8.99E-07    | 1.73E-10 |
| phe.Fasting_rs183597049S7 | DIAPH1 | rs116011837S9 |     | BRD2      | 4.89E-11 | 0.00199774  | 6.62E-08 | 4.07E-14 | 1.66E-06    | 2.85E-10 |
| phe.Fasting_rs183597049S7 | DIAPH1 | rs116079984S8 |     | KPNA3     | 2.97E-15 | 1.21E-07    | 8.14E-12 | 1.24E-13 | 5.04E-06    | 7.34E-10 |
| phe.Fasting_rs183597049S7 | DIAPH1 | rs116120727S9 |     | BRD2      | 4.89E-11 | 0.00199774  | 6.62E-08 | 4.07E-14 | 1.66E-06    | 2.85E-10 |

|                           |        |                |           |          |             |          |          |             |          |
|---------------------------|--------|----------------|-----------|----------|-------------|----------|----------|-------------|----------|
| phe.Fasting_rs183597049S7 | DIAPH1 | rs116548615 S8 | TMEM45B   | 1.73E-16 | 7.06E-09    | 6.15E-13 | 8.70E-12 | 0.000354153 | 3.26E-08 |
| phe.Fasting_rs183597049S7 | DIAPH1 | rs146815317S5  | KPNA3     | 2.97E-15 | 1.21E-07    | 8.14E-12 | 1.18E-13 | 4.80E-06    | 7.06E-10 |
| phe.Fasting_rs183597049S7 | DIAPH1 | rs150117838S8  | KPNA3     | 2.97E-15 | 1.21E-07    | 8.14E-12 | 1.09E-13 | 4.44E-06    | 6.79E-10 |
| phe.Fasting_rs183597049S7 | DIAPH1 | rs16894241 S4  | HIST1H2BK | 1.99E-11 | 0.000812315 | 2.96E-08 | 3.44E-14 | 1.40E-06    | 2.50E-10 |
| phe.Fasting_rs183597049S7 | DIAPH1 | rs57503635 S3  | NA        | 6.34E-16 | 2.59E-08    | 1.95E-12 | 3.17E-14 | 1.29E-06    | 2.34E-10 |
| phe.Fasting_rs183597049S7 | DIAPH1 | rs7256517 S7   | CYTH2     | 1.04E-15 | 4.24E-08    | 3.06E-12 | 4.82E-12 | 0.000196022 | 1.91E-08 |
| phe.Fasting_rs183597049S7 | DIAPH1 | rs73392640 S8  | POLR3B    | 2.02E-10 | 0.00826001  | 2.49E-07 | 5.19E-11 | 0.00211214  | 1.67E-07 |
| phe.Fasting_rs183597049S7 | DIAPH1 | rs73619637 S8  | NA        | 1.44E-15 | 5.89E-08    | 4.14E-12 | 2.05E-10 | 0.00833668  | 5.78E-07 |
| phe.Fasting_rs183597049S7 | DIAPH1 | rs74914207 S24 | NA        | 1.37E-10 | 0.00558626  | 1.73E-07 | 9.12E-11 | 0.0037135   | 2.80E-07 |
| phe.Fasting_rs183597049S7 | DIAPH1 | rs75758702 S24 | NA        | 7.02E-17 | 2.87E-09    | 3.16E-13 | 1.57E-10 | 0.00638323  | 4.59E-07 |
| phe.Fasting_rs183597049S7 | DIAPH1 | rs7763107 S8   | FARS2     | 5.78E-16 | 2.36E-08    | 1.79E-12 | 9.23E-12 | 0.000375564 | 3.44E-08 |
| phe.Fasting_rs183597049S7 | DIAPH1 | rs77798597 S7  | KPNA3     | 2.97E-15 | 1.21E-07    | 8.14E-12 | 1.09E-13 | 4.44E-06    | 6.79E-10 |
| phe.Fasting_rs183597049S7 | DIAPH1 | rs78516788 S8  | SLC38A1   | 2.75E-11 | 0.00112269  | 3.94E-08 | 2.44E-10 | 0.00992686  | 6.74E-07 |
| phe.Fasting_rs183597049S7 | DIAPH1 | rs78736524 S5  | KPNA3     | 2.97E-15 | 1.21E-07    | 8.14E-12 | 1.18E-13 | 4.80E-06    | 7.06E-10 |
| phe.Fasting_rs183597049S7 | DIAPH1 | rs79781495 S8  | KPNA3     | 2.97E-15 | 1.21E-07    | 8.14E-12 | 1.09E-13 | 4.44E-06    | 6.79E-10 |
| phe.Fasting_rs183597049S7 | DIAPH1 | rs80332465 S5  | KPNA3     | 3.13E-15 | 1.28E-07    | 8.51E-12 | 1.17E-13 | 4.77E-06    | 7.06E-10 |
| phe.Fasting_rs183597049S7 | DIAPH1 | rs80334773 S5  | KPNA3     | 3.13E-15 | 1.28E-07    | 8.51E-12 | 1.17E-13 | 4.77E-06    | 7.06E-10 |
| phe.Fasting_rs183980988S2 | NA     | rs115787552S5  | KPNA3     | 2.97E-15 | 1.21E-07    | 8.14E-12 | 1.18E-13 | 4.80E-06    | 7.06E-10 |
| phe.Fasting_rs183980988S2 | NA     | rs115888477S8  | NA        | 2.03E-14 | 8.28E-07    | 5.02E-11 | 2.21E-14 | 8.99E-07    | 1.73E-10 |
| phe.Fasting_rs183980988S2 | NA     | rs116011837S9  | BRD2      | 4.89E-11 | 0.00199774  | 6.62E-08 | 4.07E-14 | 1.66E-06    | 2.85E-10 |
| phe.Fasting_rs183980988S2 | NA     | rs116079984S8  | KPNA3     | 2.97E-15 | 1.21E-07    | 8.14E-12 | 1.24E-13 | 5.04E-06    | 7.34E-10 |
| phe.Fasting_rs183980988S2 | NA     | rs116120727S9  | BRD2      | 4.89E-11 | 0.00199774  | 6.62E-08 | 4.07E-14 | 1.66E-06    | 2.85E-10 |
| phe.Fasting_rs183980988S2 | NA     | rs116548615S8  | TMEM45B   | 1.73E-16 | 7.06E-09    | 6.15E-13 | 8.70E-12 | 0.000354153 | 3.26E-08 |
| phe.Fasting_rs183980988S2 | NA     | rs146815317S5  | KPNA3     | 2.97E-15 | 1.21E-07    | 8.14E-12 | 1.18E-13 | 4.80E-06    | 7.06E-10 |
| phe.Fasting_rs183980988S2 | NA     | rs150117838S8  | KPNA3     | 2.97E-15 | 1.21E-07    | 8.14E-12 | 1.09E-13 | 4.44E-06    | 6.79E-10 |
| phe.Fasting_rs183980988S2 | NA     | rs16894241 S4  | HIST1H2BK | 1.99E-11 | 0.000812315 | 2.96E-08 | 3.44E-14 | 1.40E-06    | 2.50E-10 |
| phe.Fasting_rs183980988S2 | NA     | rs57503635 S3  | NA        | 6.34E-16 | 2.59E-08    | 1.95E-12 | 3.17E-14 | 1.29E-06    | 2.34E-10 |
| phe.Fasting_rs183980988S2 | NA     | rs7256517 S7   | CYTH2     | 1.04E-15 | 4.24E-08    | 3.06E-12 | 4.82E-12 | 0.000196022 | 1.91E-08 |
| phe.Fasting_rs183980988S2 | NA     | rs73392640 S8  | POLR3B    | 2.02E-10 | 0.00826001  | 2.49E-07 | 5.19E-11 | 0.00211214  | 1.67E-07 |
| phe.Fasting_rs183980988S2 | NA     | rs73619637 S8  | NA        | 1.44E-15 | 5.89E-08    | 4.14E-12 | 2.05E-10 | 0.00833668  | 5.78E-07 |
| phe.Fasting_rs183980988S2 | NA     | rs74914207 S24 | NA        | 1.37E-10 | 0.00558626  | 1.73E-07 | 9.12E-11 | 0.0037135   | 2.80E-07 |
| phe.Fasting_rs183980988S2 | NA     | rs75758702 S24 | NA        | 7.02E-17 | 2.87E-09    | 3.16E-13 | 1.57E-10 | 0.00638323  | 4.59E-07 |
| phe.Fasting_rs183980988S2 | NA     | rs7763107 S8   | FARS2     | 5.78E-16 | 2.36E-08    | 1.79E-12 | 9.23E-12 | 0.000375564 | 3.44E-08 |
| phe.Fasting_rs183980988S2 | NA     | rs77798597 S7  | KPNA3     | 2.97E-15 | 1.21E-07    | 8.14E-12 | 1.09E-13 | 4.44E-06    | 6.79E-10 |
| phe.Fasting_rs183980988S2 | NA     | rs78516788 S8  | SLC38A1   | 2.75E-11 | 0.00112269  | 3.94E-08 | 2.44E-10 | 0.00992686  | 6.74E-07 |
| phe.Fasting_rs183980988S2 | NA     | rs78736524 S5  | KPNA3     | 2.97E-15 | 1.21E-07    | 8.14E-12 | 1.18E-13 | 4.80E-06    | 7.06E-10 |
| phe.Fasting_rs183980988S2 | NA     | rs79781495 S8  | KPNA3     | 2.97E-15 | 1.21E-07    | 8.14E-12 | 1.09E-13 | 4.44E-06    | 6.79E-10 |
| phe.Fasting_rs183980988S2 | NA     | rs80332465 S5  | KPNA3     | 3.13E-15 | 1.28E-07    | 8.51E-12 | 1.17E-13 | 4.77E-06    | 7.06E-10 |
| phe.Fasting_rs183980988S2 | NA     | rs80334773 S5  | KPNA3     | 3.13E-15 | 1.28E-07    | 8.51E-12 | 1.17E-13 | 4.77E-06    | 7.06E-10 |
| phe.Fasting_rs184233232S7 | DIAPH1 | rs115787552S5  | KPNA3     | 2.97E-15 | 1.21E-07    | 8.14E-12 | 1.18E-13 | 4.80E-06    | 7.06E-10 |

|              |             |     |           |               |     |           |          |             |          |          |             |          |
|--------------|-------------|-----|-----------|---------------|-----|-----------|----------|-------------|----------|----------|-------------|----------|
| phe.Fasting_ | rs184233232 | S7  | DIAPH1    | rs115888477   | S8  | NA        | 2.03E-14 | 8.28E-07    | 5.02E-11 | 2.21E-14 | 8.99E-07    | 1.73E-10 |
| phe.Fasting_ | rs184233232 | S7  | DIAPH1    | rs116011837   | S9  | BRD2      | 4.89E-11 | 0.00199774  | 6.62E-08 | 4.07E-14 | 1.66E-06    | 2.85E-10 |
| phe.Fasting_ | rs184233232 | S7  | DIAPH1    | rs116079984   | S8  | KPNA3     | 2.97E-15 | 1.21E-07    | 8.14E-12 | 1.24E-13 | 5.04E-06    | 7.34E-10 |
| phe.Fasting_ | rs184233232 | S7  | DIAPH1    | rs116120727   | S9  | BRD2      | 4.89E-11 | 0.00199774  | 6.62E-08 | 4.07E-14 | 1.66E-06    | 2.85E-10 |
| phe.Fasting_ | rs184233232 | S7  | DIAPH1    | rs116548615   | S8  | TMEM45B   | 1.73E-16 | 7.06E-09    | 6.15E-13 | 8.70E-12 | 0.000354153 | 3.26E-08 |
| phe.Fasting_ | rs184233232 | S7  | DIAPH1    | rs146815317   | S5  | KPNA3     | 2.97E-15 | 1.21E-07    | 8.14E-12 | 1.18E-13 | 4.80E-06    | 7.06E-10 |
| phe.Fasting_ | rs184233232 | S7  | DIAPH1    | rs150117838   | S8  | KPNA3     | 2.97E-15 | 1.21E-07    | 8.14E-12 | 1.09E-13 | 4.44E-06    | 6.79E-10 |
| phe.Fasting_ | rs184233232 | S7  | DIAPH1    | rs16894241    | S4  | HIST1H2BK | 1.99E-11 | 0.000812315 | 2.96E-08 | 3.44E-14 | 1.40E-06    | 2.50E-10 |
| phe.Fasting_ | rs184233232 | S7  | DIAPH1    | rs57503635    | S3  | NA        | 6.34E-16 | 2.59E-08    | 1.95E-12 | 3.17E-14 | 1.29E-06    | 2.34E-10 |
| phe.Fasting_ | rs184233232 | S7  | DIAPH1    | rs7256517     | S7  | CYTH2     | 1.04E-15 | 4.24E-08    | 3.06E-12 | 4.82E-12 | 0.000196022 | 1.91E-08 |
| phe.Fasting_ | rs184233232 | S7  | DIAPH1    | rs73392640    | S8  | POLR3B    | 2.02E-10 | 0.00826001  | 2.49E-07 | 5.19E-11 | 0.00211214  | 1.67E-07 |
| phe.Fasting_ | rs184233232 | S7  | DIAPH1    | rs73619637    | S8  | NA        | 1.44E-15 | 5.89E-08    | 4.14E-12 | 2.05E-10 | 0.00833668  | 5.78E-07 |
| phe.Fasting_ | rs184233232 | S7  | DIAPH1    | rs74914207    | S24 | NA        | 1.37E-10 | 0.00558626  | 1.73E-07 | 9.12E-11 | 0.0037135   | 2.80E-07 |
| phe.Fasting_ | rs184233232 | S7  | DIAPH1    | rs75758702    | S24 | NA        | 7.02E-17 | 2.87E-09    | 3.16E-13 | 1.57E-10 | 0.00638323  | 4.59E-07 |
| phe.Fasting_ | rs184233232 | S7  | DIAPH1    | rs7763107     | S8  | FARS2     | 5.78E-16 | 2.36E-08    | 1.79E-12 | 9.23E-12 | 0.000375564 | 3.44E-08 |
| phe.Fasting_ | rs184233232 | S7  | DIAPH1    | rs77798597    | S7  | KPNA3     | 2.97E-15 | 1.21E-07    | 8.14E-12 | 1.09E-13 | 4.44E-06    | 6.79E-10 |
| phe.Fasting_ | rs184233232 | S7  | DIAPH1    | rs78516788    | S8  | SLC38A1   | 2.75E-11 | 0.00112269  | 3.94E-08 | 2.44E-10 | 0.00992686  | 6.74E-07 |
| phe.Fasting_ | rs184233232 | S7  | DIAPH1    | rs78736524    | S5  | KPNA3     | 2.97E-15 | 1.21E-07    | 8.14E-12 | 1.18E-13 | 4.80E-06    | 7.06E-10 |
| phe.Fasting_ | rs184233232 | S7  | DIAPH1    | rs79781495    | S8  | KPNA3     | 2.97E-15 | 1.21E-07    | 8.14E-12 | 1.09E-13 | 4.44E-06    | 6.79E-10 |
| phe.Fasting_ | rs184233232 | S7  | DIAPH1    | rs80332465    | S5  | KPNA3     | 3.13E-15 | 1.28E-07    | 8.51E-12 | 1.17E-13 | 4.77E-06    | 7.06E-10 |
| phe.Fasting_ | rs184233232 | S7  | DIAPH1    | rs80334773    | S5  | KPNA3     | 3.13E-15 | 1.28E-07    | 8.51E-12 | 1.17E-13 | 4.77E-06    | 7.06E-10 |
| phe.Fasting_ | rs184509477 | S13 | "PCDHGB4, | Pirs115787552 | S5  | KPNA3     | 2.97E-15 | 1.21E-07    | 8.14E-12 | 1.18E-13 | 4.80E-06    | 7.06E-10 |
| phe.Fasting_ | rs184509477 | S13 | "PCDHGB4, | Pirs115888477 | S8  | NA        | 2.03E-14 | 8.28E-07    | 5.02E-11 | 2.21E-14 | 8.99E-07    | 1.73E-10 |
| phe.Fasting_ | rs184509477 | S13 | "PCDHGB4, | Pirs116011837 | S9  | BRD2      | 4.89E-11 | 0.00199774  | 6.62E-08 | 4.07E-14 | 1.66E-06    | 2.85E-10 |
| phe.Fasting_ | rs184509477 | S13 | "PCDHGB4, | Pirs116079984 | S8  | KPNA3     | 2.97E-15 | 1.21E-07    | 8.14E-12 | 1.24E-13 | 5.04E-06    | 7.34E-10 |
| phe.Fasting_ | rs184509477 | S13 | "PCDHGB4, | Pirs116120727 | S9  | BRD2      | 4.89E-11 | 0.00199774  | 6.62E-08 | 4.07E-14 | 1.66E-06    | 2.85E-10 |
| phe.Fasting_ | rs184509477 | S13 | "PCDHGB4, | Pirs116548615 | S8  | TMEM45B   | 1.73E-16 | 7.06E-09    | 6.15E-13 | 8.70E-12 | 0.000354153 | 3.26E-08 |
| phe.Fasting_ | rs184509477 | S13 | "PCDHGB4, | Pirs146815317 | S5  | KPNA3     | 2.97E-15 | 1.21E-07    | 8.14E-12 | 1.18E-13 | 4.80E-06    | 7.06E-10 |
| phe.Fasting_ | rs184509477 | S13 | "PCDHGB4, | Pirs150117838 | S8  | KPNA3     | 2.97E-15 | 1.21E-07    | 8.14E-12 | 1.09E-13 | 4.44E-06    | 6.79E-10 |
| phe.Fasting_ | rs184509477 | S13 | "PCDHGB4, | Pirs16894241  | S4  | HIST1H2BK | 1.99E-11 | 0.000812315 | 2.96E-08 | 3.44E-14 | 1.40E-06    | 2.50E-10 |
| phe.Fasting_ | rs184509477 | S13 | "PCDHGB4, | Pirs57503635  | S3  | NA        | 6.34E-16 | 2.59E-08    | 1.95E-12 | 3.17E-14 | 1.29E-06    | 2.34E-10 |
| phe.Fasting_ | rs184509477 | S13 | "PCDHGB4, | Pirs7256517   | S7  | CYTH2     | 1.04E-15 | 4.24E-08    | 3.06E-12 | 4.82E-12 | 0.000196022 | 1.91E-08 |
| phe.Fasting_ | rs184509477 | S13 | "PCDHGB4, | Pirs73392640  | S8  | POLR3B    | 2.02E-10 | 0.00826001  | 2.49E-07 | 5.19E-11 | 0.00211214  | 1.67E-07 |
| phe.Fasting_ | rs184509477 | S13 | "PCDHGB4, | Pirs73619637  | S8  | NA        | 1.44E-15 | 5.89E-08    | 4.14E-12 | 2.05E-10 | 0.00833668  | 5.78E-07 |
| phe.Fasting_ | rs184509477 | S13 | "PCDHGB4, | Pirs74914207  | S24 | NA        | 1.37E-10 | 0.00558626  | 1.73E-07 | 9.12E-11 | 0.0037135   | 2.80E-07 |
| phe.Fasting_ | rs184509477 | S13 | "PCDHGB4, | Pirs75758702  | S24 | NA        | 7.02E-17 | 2.87E-09    | 3.16E-13 | 1.57E-10 | 0.00638323  | 4.59E-07 |
| phe.Fasting_ | rs184509477 | S13 | "PCDHGB4, | Pirs7763107   | S8  | FARS2     | 5.78E-16 | 2.36E-08    | 1.79E-12 | 9.23E-12 | 0.000375564 | 3.44E-08 |
| phe.Fasting_ | rs184509477 | S13 | "PCDHGB4, | Pirs77798597  | S7  | KPNA3     | 2.97E-15 | 1.21E-07    | 8.14E-12 | 1.09E-13 | 4.44E-06    | 6.79E-10 |
| phe.Fasting_ | rs184509477 | S13 | "PCDHGB4, | Pirs78516788  | S8  | SLC38A1   | 2.75E-11 | 0.00112269  | 3.94E-08 | 2.44E-10 | 0.00992686  | 6.74E-07 |
| phe.Fasting_ | rs184509477 | S13 | "PCDHGB4, | Pirs78736524  | S5  | KPNA3     | 2.97E-15 | 1.21E-07    | 8.14E-12 | 1.18E-13 | 4.80E-06    | 7.06E-10 |

|                             |                           |           |          |             |          |          |             |          |
|-----------------------------|---------------------------|-----------|----------|-------------|----------|----------|-------------|----------|
| phe.Fasting_rs184509477 S13 | "PCDHGB4,Prs79781495 S8   | KPNA3     | 2.97E-15 | 1.21E-07    | 8.14E-12 | 1.09E-13 | 4.44E-06    | 6.79E-10 |
| phe.Fasting_rs184509477 S13 | "PCDHGB4,Prs80332465 S5   | KPNA3     | 3.13E-15 | 1.28E-07    | 8.51E-12 | 1.17E-13 | 4.77E-06    | 7.06E-10 |
| phe.Fasting_rs184509477 S13 | "PCDHGB4,Prs80334773 S5   | KPNA3     | 3.13E-15 | 1.28E-07    | 8.51E-12 | 1.17E-13 | 4.77E-06    | 7.06E-10 |
| phe.Fasting_rs185069296 S15 | "LOC100505(rs115787552 S5 | KPNA3     | 2.97E-15 | 1.21E-07    | 8.14E-12 | 1.18E-13 | 4.80E-06    | 7.06E-10 |
| phe.Fasting_rs185069296 S15 | "LOC100505(rs115888477 S8 | NA        | 2.03E-14 | 8.28E-07    | 5.02E-11 | 2.21E-14 | 8.99E-07    | 1.73E-10 |
| phe.Fasting_rs185069296 S15 | "LOC100505(rs116011837 S9 | BRD2      | 4.89E-11 | 0.00199774  | 6.62E-08 | 4.07E-14 | 1.66E-06    | 2.85E-10 |
| phe.Fasting_rs185069296 S15 | "LOC100505(rs116079984 S8 | KPNA3     | 2.97E-15 | 1.21E-07    | 8.14E-12 | 1.24E-13 | 5.04E-06    | 7.34E-10 |
| phe.Fasting_rs185069296 S15 | "LOC100505(rs116120727 S9 | BRD2      | 4.89E-11 | 0.00199774  | 6.62E-08 | 4.07E-14 | 1.66E-06    | 2.85E-10 |
| phe.Fasting_rs185069296 S15 | "LOC100505(rs116548615 S8 | TMEM45B   | 1.73E-16 | 7.06E-09    | 6.15E-13 | 8.70E-12 | 0.000354153 | 3.26E-08 |
| phe.Fasting_rs185069296 S15 | "LOC100505(rs146815317 S5 | KPNA3     | 2.97E-15 | 1.21E-07    | 8.14E-12 | 1.18E-13 | 4.80E-06    | 7.06E-10 |
| phe.Fasting_rs185069296 S15 | "LOC100505(rs150117838 S8 | KPNA3     | 2.97E-15 | 1.21E-07    | 8.14E-12 | 1.09E-13 | 4.44E-06    | 6.79E-10 |
| phe.Fasting_rs185069296 S15 | "LOC100505(rs16894241 S4  | HIST1H2BK | 1.99E-11 | 0.000812315 | 2.96E-08 | 3.44E-14 | 1.40E-06    | 2.50E-10 |
| phe.Fasting_rs185069296 S15 | "LOC100505(rs57503635 S3  | NA        | 6.34E-16 | 2.59E-08    | 1.95E-12 | 3.17E-14 | 1.29E-06    | 2.34E-10 |
| phe.Fasting_rs185069296 S15 | "LOC100505(rs7256517 S7   | CYTH2     | 1.04E-15 | 4.24E-08    | 3.06E-12 | 4.82E-12 | 0.000196022 | 1.91E-08 |
| phe.Fasting_rs185069296 S15 | "LOC100505(rs73392640 S8  | POLR3B    | 2.02E-10 | 0.00826001  | 2.49E-07 | 5.19E-11 | 0.00211214  | 1.67E-07 |
| phe.Fasting_rs185069296 S15 | "LOC100505(rs73619637 S8  | NA        | 1.44E-15 | 5.89E-08    | 4.14E-12 | 2.05E-10 | 0.00833668  | 5.78E-07 |
| phe.Fasting_rs185069296 S15 | "LOC100505(rs74914207 S24 | NA        | 1.37E-10 | 0.00558626  | 1.73E-07 | 9.12E-11 | 0.0037135   | 2.80E-07 |
| phe.Fasting_rs185069296 S15 | "LOC100505(rs75758702 S24 | NA        | 7.02E-17 | 2.87E-09    | 3.16E-13 | 1.57E-10 | 0.00638323  | 4.59E-07 |
| phe.Fasting_rs185069296 S15 | "LOC100505(rs7763107 S8   | FARS2     | 5.78E-16 | 2.36E-08    | 1.79E-12 | 9.23E-12 | 0.000375564 | 3.44E-08 |
| phe.Fasting_rs185069296 S15 | "LOC100505(rs77798597 S7  | KPNA3     | 2.97E-15 | 1.21E-07    | 8.14E-12 | 1.09E-13 | 4.44E-06    | 6.79E-10 |
| phe.Fasting_rs185069296 S15 | "LOC100505(rs78516788 S8  | SLC38A1   | 2.75E-11 | 0.00112269  | 3.94E-08 | 2.44E-10 | 0.00992686  | 6.74E-07 |
| phe.Fasting_rs185069296 S15 | "LOC100505(rs78736524 S5  | KPNA3     | 2.97E-15 | 1.21E-07    | 8.14E-12 | 1.18E-13 | 4.80E-06    | 7.06E-10 |
| phe.Fasting_rs185069296 S15 | "LOC100505(rs79781495 S8  | KPNA3     | 2.97E-15 | 1.21E-07    | 8.14E-12 | 1.09E-13 | 4.44E-06    | 6.79E-10 |
| phe.Fasting_rs185069296 S15 | "LOC100505(rs80332465 S5  | KPNA3     | 3.13E-15 | 1.28E-07    | 8.51E-12 | 1.17E-13 | 4.77E-06    | 7.06E-10 |
| phe.Fasting_rs185069296 S15 | "LOC100505(rs80334773 S5  | KPNA3     | 3.13E-15 | 1.28E-07    | 8.51E-12 | 1.17E-13 | 4.77E-06    | 7.06E-10 |
| phe.Fasting_rs185502834 S8  | DIAPH1 rs112089881 S8     | ZFAND4    | 3.24E-18 | 1.32E-10    | 5.45E-14 | 1.95E-10 | 0.00795558  | 5.56E-07 |
| phe.Fasting_rs185502834 S8  | DIAPH1 rs115787552 S5     | KPNA3     | 5.05E-16 | 2.06E-08    | 1.59E-12 | 2.34E-14 | 9.53E-07    | 1.79E-10 |
| phe.Fasting_rs185502834 S8  | DIAPH1 rs115888477 S8     | NA        | 3.68E-15 | 1.50E-07    | 9.90E-12 | 4.11E-15 | 1.67E-07    | 3.84E-11 |
| phe.Fasting_rs185502834 S8  | DIAPH1 rs116011837 S9     | BRD2      | 9.60E-12 | 0.000392176 | 1.53E-08 | 9.05E-15 | 3.68E-07    | 7.90E-11 |
| phe.Fasting_rs185502834 S8  | DIAPH1 rs116079984 S8     | KPNA3     | 5.05E-16 | 2.06E-08    | 1.59E-12 | 2.56E-14 | 1.04E-06    | 1.94E-10 |
| phe.Fasting_rs185502834 S8  | DIAPH1 rs116120727 S9     | BRD2      | 9.60E-12 | 0.000392176 | 1.53E-08 | 9.05E-15 | 3.68E-07    | 7.90E-11 |
| phe.Fasting_rs185502834 S8  | DIAPH1 rs116548615 S8     | TMEM45B   | 2.95E-17 | 1.21E-09    | 1.69E-13 | 1.76E-12 | 7.17E-05    | 7.72E-09 |
| phe.Fasting_rs185502834 S8  | DIAPH1 rs146815317 S5     | KPNA3     | 5.05E-16 | 2.06E-08    | 1.59E-12 | 2.34E-14 | 9.53E-07    | 1.79E-10 |
| phe.Fasting_rs185502834 S8  | DIAPH1 rs150117838 S8     | KPNA3     | 5.05E-16 | 2.06E-08    | 1.59E-12 | 2.16E-14 | 8.80E-07    | 1.71E-10 |
| phe.Fasting_rs185502834 S8  | DIAPH1 rs16894241 S4      | HIST1H2BK | 3.73E-12 | 0.000152384 | 6.73E-09 | 6.62E-15 | 2.69E-07    | 5.94E-11 |
| phe.Fasting_rs185502834 S8  | DIAPH1 rs57503635 S3      | NA        | 1.28E-16 | 5.23E-09    | 5.19E-13 | 6.61E-15 | 2.69E-07    | 5.94E-11 |
| phe.Fasting_rs185502834 S8  | DIAPH1 rs7256517 S7       | CYTH2     | 1.59E-16 | 6.48E-09    | 6.03E-13 | 9.69E-13 | 3.95E-05    | 4.59E-09 |
| phe.Fasting_rs185502834 S8  | DIAPH1 rs73392640 S8      | POLR3B    | 4.58E-11 | 0.00187102  | 6.24E-08 | 6.82E-12 | 0.000277641 | 2.62E-08 |
| phe.Fasting_rs185502834 S8  | DIAPH1 rs74914207 S24     | NA        | 2.89E-11 | 0.00117833  | 4.13E-08 | 1.56E-11 | 0.000634366 | 5.60E-08 |
| phe.Fasting_rs185502834 S8  | DIAPH1 rs75758702 S24     | NA        | 1.04E-17 | 4.25E-10    | 9.89E-14 | 2.85E-11 | 0.00115844  | 9.77E-08 |



|              |             |     |           |             |             |           |          |             |          |          |             |             |          |
|--------------|-------------|-----|-----------|-------------|-------------|-----------|----------|-------------|----------|----------|-------------|-------------|----------|
| phe.Fasting_ | rs185502834 | S8  | DIAPH1    | rs7763107   | S8          | FARS2     | 9.44E-17 | 3.86E-09    | 4.06E-13 | 1.60E-12 | 6.52E-05    | 7.13E-09    |          |
| phe.Fasting_ | rs185502834 | S8  | DIAPH1    | rs77798597  | S7          | KPNA3     | 5.05E-16 | 2.06E-08    | 1.59E-12 | 2.16E-14 | 8.80E-07    | 1.71E-10    |          |
| phe.Fasting_ | rs185502834 | S8  | DIAPH1    | rs78697063  | S5          | MSI2      | 7.77E-20 | 3.17E-12    | 2.23E-14 | 1.45E-10 | 0.00591847  | 4.35E-07    |          |
| phe.Fasting_ | rs185502834 | S8  | DIAPH1    | rs78736524  | S5          | KPNA3     | 5.05E-16 | 2.06E-08    | 1.59E-12 | 2.34E-14 | 9.53E-07    | 1.79E-10    |          |
| phe.Fasting_ | rs185502834 | S8  | DIAPH1    | rs79781495  | S8          | KPNA3     | 5.05E-16 | 2.06E-08    | 1.59E-12 | 2.16E-14 | 8.80E-07    | 1.71E-10    |          |
| phe.Fasting_ | rs185502834 | S8  | DIAPH1    | rs80332465  | S5          | KPNA3     | 5.36E-16 | 2.19E-08    | 1.67E-12 | 2.32E-14 | 9.45E-07    | 1.79E-10    |          |
| phe.Fasting_ | rs185502834 | S8  | DIAPH1    | rs80334773  | S5          | KPNA3     | 5.36E-16 | 2.19E-08    | 1.67E-12 | 2.32E-14 | 9.45E-07    | 1.79E-10    |          |
| phe.Fasting_ | rs185759881 | S7  | DIAPH1    | rs115787552 | S5          | KPNA3     | 2.97E-15 | 1.21E-07    | 8.14E-12 | 1.18E-13 | 4.80E-06    | 7.06E-10    |          |
| phe.Fasting_ | rs185759881 | S7  | DIAPH1    | rs115888477 | S8          | NA        | 2.03E-14 | 8.28E-07    | 5.02E-11 | 2.21E-14 | 8.99E-07    | 1.73E-10    |          |
| phe.Fasting_ | rs185759881 | S7  | DIAPH1    | rs116011837 | S9          | BRD2      | 4.89E-11 | 0.00199774  | 6.62E-08 | 4.07E-14 | 1.66E-06    | 2.85E-10    |          |
| phe.Fasting_ | rs185759881 | S7  | DIAPH1    | rs116079984 | S8          | KPNA3     | 2.97E-15 | 1.21E-07    | 8.14E-12 | 1.24E-13 | 5.04E-06    | 7.34E-10    |          |
| phe.Fasting_ | rs185759881 | S7  | DIAPH1    | rs116120727 | S9          | BRD2      | 4.89E-11 | 0.00199774  | 6.62E-08 | 4.07E-14 | 1.66E-06    | 2.85E-10    |          |
| phe.Fasting_ | rs185759881 | S7  | DIAPH1    | rs116548615 | S8          | TMEM45B   | 1.73E-16 | 7.06E-09    | 6.15E-13 | 8.70E-12 | 0.000354153 | 3.26E-08    |          |
| phe.Fasting_ | rs185759881 | S7  | DIAPH1    | rs146815317 | S5          | KPNA3     | 2.97E-15 | 1.21E-07    | 8.14E-12 | 1.18E-13 | 4.80E-06    | 7.06E-10    |          |
| phe.Fasting_ | rs185759881 | S7  | DIAPH1    | rs150117838 | S8          | KPNA3     | 2.97E-15 | 1.21E-07    | 8.14E-12 | 1.09E-13 | 4.44E-06    | 6.79E-10    |          |
| phe.Fasting_ | rs185759881 | S7  | DIAPH1    | rs16894241  | S4          | HIST1H2BK | 1.99E-11 | 0.000812315 | 2.96E-08 | 3.44E-14 | 1.40E-06    | 2.50E-10    |          |
| phe.Fasting_ | rs185759881 | S7  | DIAPH1    | rs57503635  | S3          | NA        | 6.34E-16 | 2.59E-08    | 1.95E-12 | 3.17E-14 | 1.29E-06    | 2.34E-10    |          |
| phe.Fasting_ | rs185759881 | S7  | DIAPH1    | rs7256517   | S7          | CYTH2     | 1.04E-15 | 4.24E-08    | 3.06E-12 | 4.82E-12 | 0.000196022 | 1.91E-08    |          |
| phe.Fasting_ | rs185759881 | S7  | DIAPH1    | rs73392640  | S8          | POLR3B    | 2.02E-10 | 0.00826001  | 2.49E-07 | 5.19E-11 | 0.00211214  | 1.67E-07    |          |
| phe.Fasting_ | rs185759881 | S7  | DIAPH1    | rs73619637  | S8          | NA        | 1.44E-15 | 5.89E-08    | 4.14E-12 | 2.05E-10 | 0.00833668  | 5.78E-07    |          |
| phe.Fasting_ | rs185759881 | S7  | DIAPH1    | rs74914207  | S24         | NA        | 1.37E-10 | 0.00558626  | 1.73E-07 | 9.12E-11 | 0.0037135   | 2.80E-07    |          |
| phe.Fasting_ | rs185759881 | S7  | DIAPH1    | rs75758702  | S24         | NA        | 7.02E-17 | 2.87E-09    | 3.16E-13 | 1.57E-10 | 0.00638323  | 4.59E-07    |          |
| phe.Fasting_ | rs185759881 | S7  | DIAPH1    | rs7763107   | S8          | FARS2     | 5.78E-16 | 2.36E-08    | 1.79E-12 | 9.23E-12 | 0.000375564 | 3.44E-08    |          |
| phe.Fasting_ | rs185759881 | S7  | DIAPH1    | rs77798597  | S7          | KPNA3     | 2.97E-15 | 1.21E-07    | 8.14E-12 | 1.09E-13 | 4.44E-06    | 6.79E-10    |          |
| phe.Fasting_ | rs185759881 | S7  | DIAPH1    | rs78516788  | S8          | SLC38A1   | 2.75E-11 | 0.00112269  | 3.94E-08 | 2.44E-10 | 0.00992686  | 6.74E-07    |          |
| phe.Fasting_ | rs185759881 | S7  | DIAPH1    | rs78736524  | S5          | KPNA3     | 2.97E-15 | 1.21E-07    | 8.14E-12 | 1.18E-13 | 4.80E-06    | 7.06E-10    |          |
| phe.Fasting_ | rs185759881 | S7  | DIAPH1    | rs79781495  | S8          | KPNA3     | 2.97E-15 | 1.21E-07    | 8.14E-12 | 1.09E-13 | 4.44E-06    | 6.79E-10    |          |
| phe.Fasting_ | rs185759881 | S7  | DIAPH1    | rs80332465  | S5          | KPNA3     | 3.13E-15 | 1.28E-07    | 8.51E-12 | 1.17E-13 | 4.77E-06    | 7.06E-10    |          |
| phe.Fasting_ | rs185759881 | S7  | DIAPH1    | rs80334773  | S5          | KPNA3     | 3.13E-15 | 1.28E-07    | 8.51E-12 | 1.17E-13 | 4.77E-06    | 7.06E-10    |          |
| phe.Fasting_ | rs186288044 | S21 | "PCDHGB4, | P           | rs115787552 | S5        | KPNA3    | 3.78E-16    | 1.54E-08 | 1.23E-12 | 4.20E-14    | 1.71E-06    | 2.93E-10 |
| phe.Fasting_ | rs186288044 | S21 | "PCDHGB4, | P           | rs115888477 | S8        | NA       | 2.72E-15    | 1.11E-07 | 7.62E-12 | 7.36E-15    | 3.00E-07    | 6.53E-11 |
| phe.Fasting_ | rs186288044 | S21 | "PCDHGB4, | P           | rs116079984 | S8        | KPNA3    | 3.78E-16    | 1.54E-08 | 1.23E-12 | 4.48E-14    | 1.82E-06    | 3.11E-10 |
| phe.Fasting_ | rs186288044 | S21 | "PCDHGB4, | P           | rs116548615 | S8        | TMEM45B  | 2.04E-17    | 8.34E-10 | 1.43E-13 | 7.86E-12    | 0.000320069 | 2.98E-08 |
| phe.Fasting_ | rs186288044 | S21 | "PCDHGB4, | P           | rs146815317 | S5        | KPNA3    | 3.78E-16    | 1.54E-08 | 1.23E-12 | 4.20E-14    | 1.71E-06    | 2.93E-10 |
| phe.Fasting_ | rs186288044 | S21 | "PCDHGB4, | P           | rs150117838 | S8        | KPNA3    | 3.78E-16    | 1.54E-08 | 1.23E-12 | 3.89E-14    | 1.58E-06    | 2.77E-10 |
| phe.Fasting_ | rs186288044 | S21 | "PCDHGB4, | P           | rs77798597  | S7        | KPNA3    | 3.78E-16    | 1.54E-08 | 1.23E-12 | 3.89E-14    | 1.58E-06    | 2.77E-10 |
| phe.Fasting_ | rs186288044 | S21 | "PCDHGB4, | P           | rs78736524  | S5        | KPNA3    | 3.78E-16    | 1.54E-08 | 1.23E-12 | 4.20E-14    | 1.71E-06    | 2.93E-10 |
| phe.Fasting_ | rs186288044 | S21 | "PCDHGB4, | P           | rs79781495  | S8        | KPNA3    | 3.78E-16    | 1.54E-08 | 1.23E-12 | 3.89E-14    | 1.58E-06    | 2.77E-10 |
| phe.Fasting_ | rs186288044 | S21 | "PCDHGB4, | P           | rs80332465  | S5        | KPNA3    | 4.04E-16    | 1.65E-08 | 1.31E-12 | 4.20E-14    | 1.71E-06    | 2.93E-10 |
| phe.Fasting_ | rs186288044 | S21 | "PCDHGB4, | P           | rs80334773  | S5        | KPNA3    | 4.04E-16    | 1.65E-08 | 1.31E-12 | 4.20E-14    | 1.71E-06    | 2.93E-10 |

|              |             |     |             |             |     |           |          |             |          |          |             |          |
|--------------|-------------|-----|-------------|-------------|-----|-----------|----------|-------------|----------|----------|-------------|----------|
| phe.Fasting_ | rs187000011 | S11 | DIAPH1      | rs115787552 | S5  | KPNA3     | 2.97E-15 | 1.21E-07    | 8.14E-12 | 1.18E-13 | 4.80E-06    | 7.06E-10 |
| phe.Fasting_ | rs187000011 | S11 | DIAPH1      | rs115888477 | S8  | NA        | 2.03E-14 | 8.28E-07    | 5.02E-11 | 2.21E-14 | 8.99E-07    | 1.73E-10 |
| phe.Fasting_ | rs187000011 | S11 | DIAPH1      | rs116011837 | S9  | BRD2      | 4.89E-11 | 0.00199774  | 6.62E-08 | 4.07E-14 | 1.66E-06    | 2.85E-10 |
| phe.Fasting_ | rs187000011 | S11 | DIAPH1      | rs116079984 | S8  | KPNA3     | 2.97E-15 | 1.21E-07    | 8.14E-12 | 1.24E-13 | 5.04E-06    | 7.34E-10 |
| phe.Fasting_ | rs187000011 | S11 | DIAPH1      | rs116120727 | S9  | BRD2      | 4.89E-11 | 0.00199774  | 6.62E-08 | 4.07E-14 | 1.66E-06    | 2.85E-10 |
| phe.Fasting_ | rs187000011 | S11 | DIAPH1      | rs116548615 | S8  | TMEM45B   | 1.73E-16 | 7.06E-09    | 6.15E-13 | 8.70E-12 | 0.000354153 | 3.26E-08 |
| phe.Fasting_ | rs187000011 | S11 | DIAPH1      | rs146815317 | S5  | KPNA3     | 2.97E-15 | 1.21E-07    | 8.14E-12 | 1.18E-13 | 4.80E-06    | 7.06E-10 |
| phe.Fasting_ | rs187000011 | S11 | DIAPH1      | rs150117838 | S8  | KPNA3     | 2.97E-15 | 1.21E-07    | 8.14E-12 | 1.09E-13 | 4.44E-06    | 6.79E-10 |
| phe.Fasting_ | rs187000011 | S11 | DIAPH1      | rs16894241  | S4  | HIST1H2BK | 1.99E-11 | 0.000812315 | 2.96E-08 | 3.44E-14 | 1.40E-06    | 2.50E-10 |
| phe.Fasting_ | rs187000011 | S11 | DIAPH1      | rs57503635  | S3  | NA        | 6.34E-16 | 2.59E-08    | 1.95E-12 | 3.17E-14 | 1.29E-06    | 2.34E-10 |
| phe.Fasting_ | rs187000011 | S11 | DIAPH1      | rs7256517   | S7  | CYTH2     | 1.04E-15 | 4.24E-08    | 3.06E-12 | 4.82E-12 | 0.000196022 | 1.91E-08 |
| phe.Fasting_ | rs187000011 | S11 | DIAPH1      | rs73392640  | S8  | POLR3B    | 2.02E-10 | 0.00826001  | 2.49E-07 | 5.19E-11 | 0.00211214  | 1.67E-07 |
| phe.Fasting_ | rs187000011 | S11 | DIAPH1      | rs73619637  | S8  | NA        | 1.44E-15 | 5.89E-08    | 4.14E-12 | 2.05E-10 | 0.00833668  | 5.78E-07 |
| phe.Fasting_ | rs187000011 | S11 | DIAPH1      | rs74914207  | S24 | NA        | 1.37E-10 | 0.00558626  | 1.73E-07 | 9.12E-11 | 0.0037135   | 2.80E-07 |
| phe.Fasting_ | rs187000011 | S11 | DIAPH1      | rs75758702  | S24 | NA        | 7.02E-17 | 2.87E-09    | 3.16E-13 | 1.57E-10 | 0.00638323  | 4.59E-07 |
| phe.Fasting_ | rs187000011 | S11 | DIAPH1      | rs7763107   | S8  | FARS2     | 5.78E-16 | 2.36E-08    | 1.79E-12 | 9.23E-12 | 0.000375564 | 3.44E-08 |
| phe.Fasting_ | rs187000011 | S11 | DIAPH1      | rs77798597  | S7  | KPNA3     | 2.97E-15 | 1.21E-07    | 8.14E-12 | 1.09E-13 | 4.44E-06    | 6.79E-10 |
| phe.Fasting_ | rs187000011 | S11 | DIAPH1      | rs78516788  | S8  | SLC38A1   | 2.75E-11 | 0.00112269  | 3.94E-08 | 2.44E-10 | 0.00992686  | 6.74E-07 |
| phe.Fasting_ | rs187000011 | S11 | DIAPH1      | rs78736524  | S5  | KPNA3     | 2.97E-15 | 1.21E-07    | 8.14E-12 | 1.18E-13 | 4.80E-06    | 7.06E-10 |
| phe.Fasting_ | rs187000011 | S11 | DIAPH1      | rs79781495  | S8  | KPNA3     | 2.97E-15 | 1.21E-07    | 8.14E-12 | 1.09E-13 | 4.44E-06    | 6.79E-10 |
| phe.Fasting_ | rs187000011 | S11 | DIAPH1      | rs80332465  | S5  | KPNA3     | 3.13E-15 | 1.28E-07    | 8.51E-12 | 1.17E-13 | 4.77E-06    | 7.06E-10 |
| phe.Fasting_ | rs187000011 | S11 | DIAPH1      | rs80334773  | S5  | KPNA3     | 3.13E-15 | 1.28E-07    | 8.51E-12 | 1.17E-13 | 4.77E-06    | 7.06E-10 |
| phe.Fasting_ | rs188981295 | S5  | "RPS27AP10, | rs115787552 | S5  | KPNA3     | 2.97E-15 | 1.21E-07    | 8.14E-12 | 1.18E-13 | 4.80E-06    | 7.06E-10 |
| phe.Fasting_ | rs188981295 | S5  | "RPS27AP10, | rs115888477 | S8  | NA        | 2.03E-14 | 8.28E-07    | 5.02E-11 | 2.21E-14 | 8.99E-07    | 1.73E-10 |
| phe.Fasting_ | rs188981295 | S5  | "RPS27AP10, | rs116011837 | S9  | BRD2      | 4.89E-11 | 0.00199774  | 6.62E-08 | 4.07E-14 | 1.66E-06    | 2.85E-10 |
| phe.Fasting_ | rs188981295 | S5  | "RPS27AP10, | rs116079984 | S8  | KPNA3     | 2.97E-15 | 1.21E-07    | 8.14E-12 | 1.24E-13 | 5.04E-06    | 7.34E-10 |
| phe.Fasting_ | rs188981295 | S5  | "RPS27AP10, | rs116120727 | S9  | BRD2      | 4.89E-11 | 0.00199774  | 6.62E-08 | 4.07E-14 | 1.66E-06    | 2.85E-10 |
| phe.Fasting_ | rs188981295 | S5  | "RPS27AP10, | rs116548615 | S8  | TMEM45B   | 1.73E-16 | 7.06E-09    | 6.15E-13 | 8.70E-12 | 0.000354153 | 3.26E-08 |
| phe.Fasting_ | rs188981295 | S5  | "RPS27AP10, | rs146815317 | S5  | KPNA3     | 2.97E-15 | 1.21E-07    | 8.14E-12 | 1.18E-13 | 4.80E-06    | 7.06E-10 |
| phe.Fasting_ | rs188981295 | S5  | "RPS27AP10, | rs150117838 | S8  | KPNA3     | 2.97E-15 | 1.21E-07    | 8.14E-12 | 1.09E-13 | 4.44E-06    | 6.79E-10 |
| phe.Fasting_ | rs188981295 | S5  | "RPS27AP10, | rs16894241  | S4  | HIST1H2BK | 1.99E-11 | 0.000812315 | 2.96E-08 | 3.44E-14 | 1.40E-06    | 2.50E-10 |
| phe.Fasting_ | rs188981295 | S5  | "RPS27AP10, | rs57503635  | S3  | NA        | 6.34E-16 | 2.59E-08    | 1.95E-12 | 3.17E-14 | 1.29E-06    | 2.34E-10 |
| phe.Fasting_ | rs188981295 | S5  | "RPS27AP10, | rs7256517   | S7  | CYTH2     | 1.04E-15 | 4.24E-08    | 3.06E-12 | 4.82E-12 | 0.000196022 | 1.91E-08 |
| phe.Fasting_ | rs188981295 | S5  | "RPS27AP10, | rs73392640  | S8  | POLR3B    | 2.02E-10 | 0.00826001  | 2.49E-07 | 5.19E-11 | 0.00211214  | 1.67E-07 |
| phe.Fasting_ | rs188981295 | S5  | "RPS27AP10, | rs73619637  | S8  | NA        | 1.44E-15 | 5.89E-08    | 4.14E-12 | 2.05E-10 | 0.00833668  | 5.78E-07 |
| phe.Fasting_ | rs188981295 | S5  | "RPS27AP10, | rs74914207  | S24 | NA        | 1.37E-10 | 0.00558626  | 1.73E-07 | 9.12E-11 | 0.0037135   | 2.80E-07 |
| phe.Fasting_ | rs188981295 | S5  | "RPS27AP10, | rs75758702  | S24 | NA        | 7.02E-17 | 2.87E-09    | 3.16E-13 | 1.57E-10 | 0.00638323  | 4.59E-07 |
| phe.Fasting_ | rs188981295 | S5  | "RPS27AP10, | rs7763107   | S8  | FARS2     | 5.78E-16 | 2.36E-08    | 1.79E-12 | 9.23E-12 | 0.000375564 | 3.44E-08 |
| phe.Fasting_ | rs188981295 | S5  | "RPS27AP10, | rs77798597  | S7  | KPNA3     | 2.97E-15 | 1.21E-07    | 8.14E-12 | 1.09E-13 | 4.44E-06    | 6.79E-10 |
| phe.Fasting_ | rs188981295 | S5  | "RPS27AP10, | rs78516788  | S8  | SLC38A1   | 2.75E-11 | 0.00112269  | 3.94E-08 | 2.44E-10 | 0.00992686  | 6.74E-07 |

|                            |                          |           |          |             |          |          |             |          |
|----------------------------|--------------------------|-----------|----------|-------------|----------|----------|-------------|----------|
| phe.Fasting_rs188981295 S5 | "RPS27AP10,rs78736524 S5 | KPNA3     | 2.97E-15 | 1.21E-07    | 8.14E-12 | 1.18E-13 | 4.80E-06    | 7.06E-10 |
| phe.Fasting_rs188981295 S5 | "RPS27AP10,rs79781495 S8 | KPNA3     | 2.97E-15 | 1.21E-07    | 8.14E-12 | 1.09E-13 | 4.44E-06    | 6.79E-10 |
| phe.Fasting_rs188981295 S5 | "RPS27AP10,rs80332465 S5 | KPNA3     | 3.13E-15 | 1.28E-07    | 8.51E-12 | 1.17E-13 | 4.77E-06    | 7.06E-10 |
| phe.Fasting_rs188981295 S5 | "RPS27AP10,rs80334773 S5 | KPNA3     | 3.13E-15 | 1.28E-07    | 8.51E-12 | 1.17E-13 | 4.77E-06    | 7.06E-10 |
| phe.Fasting_rs190559574 S7 | DIAPH1 rs112089881 S8    | ZFAND4    | 3.24E-18 | 1.32E-10    | 5.45E-14 | 1.95E-10 | 0.00795558  | 5.56E-07 |
| phe.Fasting_rs190559574 S7 | DIAPH1 rs115787552 S5    | KPNA3     | 5.05E-16 | 2.06E-08    | 1.59E-12 | 2.34E-14 | 9.53E-07    | 1.79E-10 |
| phe.Fasting_rs190559574 S7 | DIAPH1 rs115888477 S8    | NA        | 3.68E-15 | 1.50E-07    | 9.90E-12 | 4.11E-15 | 1.67E-07    | 3.84E-11 |
| phe.Fasting_rs190559574 S7 | DIAPH1 rs116011837 S9    | BRD2      | 9.60E-12 | 0.000392176 | 1.53E-08 | 9.05E-15 | 3.68E-07    | 7.90E-11 |
| phe.Fasting_rs190559574 S7 | DIAPH1 rs116079984 S8    | KPNA3     | 5.05E-16 | 2.06E-08    | 1.59E-12 | 2.56E-14 | 1.04E-06    | 1.94E-10 |
| phe.Fasting_rs190559574 S7 | DIAPH1 rs116120727 S9    | BRD2      | 9.60E-12 | 0.000392176 | 1.53E-08 | 9.05E-15 | 3.68E-07    | 7.90E-11 |
| phe.Fasting_rs190559574 S7 | DIAPH1 rs116548615 S8    | TMEM45B   | 2.95E-17 | 1.21E-09    | 1.69E-13 | 1.76E-12 | 7.17E-05    | 7.72E-09 |
| phe.Fasting_rs190559574 S7 | DIAPH1 rs146815317 S5    | KPNA3     | 5.05E-16 | 2.06E-08    | 1.59E-12 | 2.34E-14 | 9.53E-07    | 1.79E-10 |
| phe.Fasting_rs190559574 S7 | DIAPH1 rs150117838 S8    | KPNA3     | 5.05E-16 | 2.06E-08    | 1.59E-12 | 2.16E-14 | 8.80E-07    | 1.71E-10 |
| phe.Fasting_rs190559574 S7 | DIAPH1 rs16894241 S4     | HIST1H2BK | 3.73E-12 | 0.000152384 | 6.73E-09 | 6.62E-15 | 2.69E-07    | 5.94E-11 |
| phe.Fasting_rs190559574 S7 | DIAPH1 rs57503635 S3     | NA        | 1.28E-16 | 5.23E-09    | 5.19E-13 | 6.61E-15 | 2.69E-07    | 5.94E-11 |
| phe.Fasting_rs190559574 S7 | DIAPH1 rs7256517 S7      | CYTH2     | 1.59E-16 | 6.48E-09    | 6.03E-13 | 9.69E-13 | 3.95E-05    | 4.59E-09 |
| phe.Fasting_rs190559574 S7 | DIAPH1 rs73392640 S8     | POLR3B    | 4.58E-11 | 0.00187102  | 6.24E-08 | 6.82E-12 | 0.000277641 | 2.62E-08 |
| phe.Fasting_rs190559574 S7 | DIAPH1 rs74914207 S24    | NA        | 2.89E-11 | 0.00117833  | 4.13E-08 | 1.56E-11 | 0.000634366 | 5.60E-08 |
| phe.Fasting_rs190559574 S7 | DIAPH1 rs75758702 S24    | NA        | 1.04E-17 | 4.25E-10    | 9.89E-14 | 2.85E-11 | 0.00115844  | 9.77E-08 |
| phe.Fasting_rs190559574 S7 | DIAPH1 rs7763107 S8      | FARS2     | 9.44E-17 | 3.86E-09    | 4.06E-13 | 1.60E-12 | 6.52E-05    | 7.13E-09 |
| phe.Fasting_rs190559574 S7 | DIAPH1 rs77798597 S7     | KPNA3     | 5.05E-16 | 2.06E-08    | 1.59E-12 | 2.16E-14 | 8.80E-07    | 1.71E-10 |
| phe.Fasting_rs190559574 S7 | DIAPH1 rs78697063 S5     | MSI2      | 7.77E-20 | 3.17E-12    | 2.23E-14 | 1.45E-10 | 0.00591847  | 4.35E-07 |
| phe.Fasting_rs190559574 S7 | DIAPH1 rs78736524 S5     | KPNA3     | 5.05E-16 | 2.06E-08    | 1.59E-12 | 2.34E-14 | 9.53E-07    | 1.79E-10 |
| phe.Fasting_rs190559574 S7 | DIAPH1 rs79781495 S8     | KPNA3     | 5.05E-16 | 2.06E-08    | 1.59E-12 | 2.16E-14 | 8.80E-07    | 1.71E-10 |
| phe.Fasting_rs190559574 S7 | DIAPH1 rs80332465 S5     | KPNA3     | 5.36E-16 | 2.19E-08    | 1.67E-12 | 2.32E-14 | 9.45E-07    | 1.79E-10 |
| phe.Fasting_rs190559574 S7 | DIAPH1 rs80334773 S5     | KPNA3     | 5.36E-16 | 2.19E-08    | 1.67E-12 | 2.32E-14 | 9.45E-07    | 1.79E-10 |
| phe.Fasting_rs191544043 S8 | DIAPH1 rs115787552 S5    | KPNA3     | 2.97E-15 | 1.21E-07    | 8.14E-12 | 1.18E-13 | 4.80E-06    | 7.06E-10 |
| phe.Fasting_rs191544043 S8 | DIAPH1 rs115888477 S8    | NA        | 2.03E-14 | 8.28E-07    | 5.02E-11 | 2.21E-14 | 8.99E-07    | 1.73E-10 |
| phe.Fasting_rs191544043 S8 | DIAPH1 rs116011837 S9    | BRD2      | 4.89E-11 | 0.00199774  | 6.62E-08 | 4.07E-14 | 1.66E-06    | 2.85E-10 |
| phe.Fasting_rs191544043 S8 | DIAPH1 rs116079984 S8    | KPNA3     | 2.97E-15 | 1.21E-07    | 8.14E-12 | 1.24E-13 | 5.04E-06    | 7.34E-10 |
| phe.Fasting_rs191544043 S8 | DIAPH1 rs116120727 S9    | BRD2      | 4.89E-11 | 0.00199774  | 6.62E-08 | 4.07E-14 | 1.66E-06    | 2.85E-10 |
| phe.Fasting_rs191544043 S8 | DIAPH1 rs116548615 S8    | TMEM45B   | 1.73E-16 | 7.06E-09    | 6.15E-13 | 8.70E-12 | 0.000354153 | 3.26E-08 |
| phe.Fasting_rs191544043 S8 | DIAPH1 rs146815317 S5    | KPNA3     | 2.97E-15 | 1.21E-07    | 8.14E-12 | 1.18E-13 | 4.80E-06    | 7.06E-10 |
| phe.Fasting_rs191544043 S8 | DIAPH1 rs150117838 S8    | KPNA3     | 2.97E-15 | 1.21E-07    | 8.14E-12 | 1.09E-13 | 4.44E-06    | 6.79E-10 |
| phe.Fasting_rs191544043 S8 | DIAPH1 rs16894241 S4     | HIST1H2BK | 1.99E-11 | 0.000812315 | 2.96E-08 | 3.44E-14 | 1.40E-06    | 2.50E-10 |
| phe.Fasting_rs191544043 S8 | DIAPH1 rs57503635 S3     | NA        | 6.34E-16 | 2.59E-08    | 1.95E-12 | 3.17E-14 | 1.29E-06    | 2.34E-10 |
| phe.Fasting_rs191544043 S8 | DIAPH1 rs7256517 S7      | CYTH2     | 1.04E-15 | 4.24E-08    | 3.06E-12 | 4.82E-12 | 0.000196022 | 1.91E-08 |
| phe.Fasting_rs191544043 S8 | DIAPH1 rs73392640 S8     | POLR3B    | 2.02E-10 | 0.00826001  | 2.49E-07 | 5.19E-11 | 0.00211214  | 1.67E-07 |
| phe.Fasting_rs191544043 S8 | DIAPH1 rs73619637 S8     | NA        | 1.44E-15 | 5.89E-08    | 4.14E-12 | 2.05E-10 | 0.00833668  | 5.78E-07 |
| phe.Fasting_rs191544043 S8 | DIAPH1 rs74914207 S24    | NA        | 1.37E-10 | 0.00558626  | 1.73E-07 | 9.12E-11 | 0.0037135   | 2.80E-07 |

|                            |        |                |           |          |             |          |          |             |          |
|----------------------------|--------|----------------|-----------|----------|-------------|----------|----------|-------------|----------|
| phe.Fasting_rs191544043 S8 | DIAPH1 | rs75758702 S24 | NA        | 7.02E-17 | 2.87E-09    | 3.16E-13 | 1.57E-10 | 0.00638323  | 4.59E-07 |
| phe.Fasting_rs191544043 S8 | DIAPH1 | rs7763107 S8   | FARS2     | 5.78E-16 | 2.36E-08    | 1.79E-12 | 9.23E-12 | 0.000375564 | 3.44E-08 |
| phe.Fasting_rs191544043 S8 | DIAPH1 | rs77798597 S7  | KPNA3     | 2.97E-15 | 1.21E-07    | 8.14E-12 | 1.09E-13 | 4.44E-06    | 6.79E-10 |
| phe.Fasting_rs191544043 S8 | DIAPH1 | rs78516788 S8  | SLC38A1   | 2.75E-11 | 0.00112269  | 3.94E-08 | 2.44E-10 | 0.00992686  | 6.74E-07 |
| phe.Fasting_rs191544043 S8 | DIAPH1 | rs78736524 S5  | KPNA3     | 2.97E-15 | 1.21E-07    | 8.14E-12 | 1.18E-13 | 4.80E-06    | 7.06E-10 |
| phe.Fasting_rs191544043 S8 | DIAPH1 | rs79781495 S8  | KPNA3     | 2.97E-15 | 1.21E-07    | 8.14E-12 | 1.09E-13 | 4.44E-06    | 6.79E-10 |
| phe.Fasting_rs191544043 S8 | DIAPH1 | rs80332465 S5  | KPNA3     | 3.13E-15 | 1.28E-07    | 8.51E-12 | 1.17E-13 | 4.77E-06    | 7.06E-10 |
| phe.Fasting_rs191544043 S8 | DIAPH1 | rs80334773 S5  | KPNA3     | 3.13E-15 | 1.28E-07    | 8.51E-12 | 1.17E-13 | 4.77E-06    | 7.06E-10 |
| phe.Fasting_rs191766712 S7 | DIAPH1 | rs115787552 S5 | KPNA3     | 2.97E-15 | 1.21E-07    | 8.14E-12 | 1.18E-13 | 4.80E-06    | 7.06E-10 |
| phe.Fasting_rs191766712 S7 | DIAPH1 | rs115888477 S8 | NA        | 2.03E-14 | 8.28E-07    | 5.02E-11 | 2.21E-14 | 8.99E-07    | 1.73E-10 |
| phe.Fasting_rs191766712 S7 | DIAPH1 | rs116011837 S9 | BRD2      | 4.89E-11 | 0.00199774  | 6.62E-08 | 4.07E-14 | 1.66E-06    | 2.85E-10 |
| phe.Fasting_rs191766712 S7 | DIAPH1 | rs116079984 S8 | KPNA3     | 2.97E-15 | 1.21E-07    | 8.14E-12 | 1.24E-13 | 5.04E-06    | 7.34E-10 |
| phe.Fasting_rs191766712 S7 | DIAPH1 | rs116120727 S9 | BRD2      | 4.89E-11 | 0.00199774  | 6.62E-08 | 4.07E-14 | 1.66E-06    | 2.85E-10 |
| phe.Fasting_rs191766712 S7 | DIAPH1 | rs116548615 S8 | TMEM45B   | 1.73E-16 | 7.06E-09    | 6.15E-13 | 8.70E-12 | 0.000354153 | 3.26E-08 |
| phe.Fasting_rs191766712 S7 | DIAPH1 | rs146815317 S5 | KPNA3     | 2.97E-15 | 1.21E-07    | 8.14E-12 | 1.18E-13 | 4.80E-06    | 7.06E-10 |
| phe.Fasting_rs191766712 S7 | DIAPH1 | rs150117838 S8 | KPNA3     | 2.97E-15 | 1.21E-07    | 8.14E-12 | 1.09E-13 | 4.44E-06    | 6.79E-10 |
| phe.Fasting_rs191766712 S7 | DIAPH1 | rs16894241 S4  | HIST1H2BK | 1.99E-11 | 0.000812315 | 2.96E-08 | 3.44E-14 | 1.40E-06    | 2.50E-10 |
| phe.Fasting_rs191766712 S7 | DIAPH1 | rs57503635 S3  | NA        | 6.34E-16 | 2.59E-08    | 1.95E-12 | 3.17E-14 | 1.29E-06    | 2.34E-10 |
| phe.Fasting_rs191766712 S7 | DIAPH1 | rs7256517 S7   | CYTH2     | 1.04E-15 | 4.24E-08    | 3.06E-12 | 4.82E-12 | 0.000196022 | 1.91E-08 |
| phe.Fasting_rs191766712 S7 | DIAPH1 | rs73392640 S8  | POLR3B    | 2.02E-10 | 0.00826001  | 2.49E-07 | 5.19E-11 | 0.00211214  | 1.67E-07 |
| phe.Fasting_rs191766712 S7 | DIAPH1 | rs736169637 S8 | NA        | 1.44E-15 | 5.89E-08    | 4.14E-12 | 2.05E-10 | 0.00833668  | 5.78E-07 |
| phe.Fasting_rs191766712 S7 | DIAPH1 | rs74914207 S24 | NA        | 1.37E-10 | 0.00558626  | 1.73E-07 | 9.12E-11 | 0.0037135   | 2.80E-07 |
| phe.Fasting_rs191766712 S7 | DIAPH1 | rs75758702 S24 | NA        | 7.02E-17 | 2.87E-09    | 3.16E-13 | 1.57E-10 | 0.00638323  | 4.59E-07 |
| phe.Fasting_rs191766712 S7 | DIAPH1 | rs7763107 S8   | FARS2     | 5.78E-16 | 2.36E-08    | 1.79E-12 | 9.23E-12 | 0.000375564 | 3.44E-08 |
| phe.Fasting_rs191766712 S7 | DIAPH1 | rs77798597 S7  | KPNA3     | 2.97E-15 | 1.21E-07    | 8.14E-12 | 1.09E-13 | 4.44E-06    | 6.79E-10 |
| phe.Fasting_rs191766712 S7 | DIAPH1 | rs78516788 S8  | SLC38A1   | 2.75E-11 | 0.00112269  | 3.94E-08 | 2.44E-10 | 0.00992686  | 6.74E-07 |
| phe.Fasting_rs191766712 S7 | DIAPH1 | rs78736524 S5  | KPNA3     | 2.97E-15 | 1.21E-07    | 8.14E-12 | 1.18E-13 | 4.80E-06    | 7.06E-10 |
| phe.Fasting_rs191766712 S7 | DIAPH1 | rs79781495 S8  | KPNA3     | 2.97E-15 | 1.21E-07    | 8.14E-12 | 1.09E-13 | 4.44E-06    | 6.79E-10 |
| phe.Fasting_rs191766712 S7 | DIAPH1 | rs80332465 S5  | KPNA3     | 3.13E-15 | 1.28E-07    | 8.51E-12 | 1.17E-13 | 4.77E-06    | 7.06E-10 |
| phe.Fasting_rs191766712 S7 | DIAPH1 | rs80334773 S5  | KPNA3     | 3.13E-15 | 1.28E-07    | 8.51E-12 | 1.17E-13 | 4.77E-06    | 7.06E-10 |
| phe.Fasting_rs192690040 S7 | DIAPH1 | rs115787552 S5 | KPNA3     | 2.97E-15 | 1.21E-07    | 8.14E-12 | 1.18E-13 | 4.80E-06    | 7.06E-10 |
| phe.Fasting_rs192690040 S7 | DIAPH1 | rs115888477 S8 | NA        | 2.03E-14 | 8.28E-07    | 5.02E-11 | 2.21E-14 | 8.99E-07    | 1.73E-10 |
| phe.Fasting_rs192690040 S7 | DIAPH1 | rs116011837 S9 | BRD2      | 4.89E-11 | 0.00199774  | 6.62E-08 | 4.07E-14 | 1.66E-06    | 2.85E-10 |
| phe.Fasting_rs192690040 S7 | DIAPH1 | rs116079984 S8 | KPNA3     | 2.97E-15 | 1.21E-07    | 8.14E-12 | 1.24E-13 | 5.04E-06    | 7.34E-10 |
| phe.Fasting_rs192690040 S7 | DIAPH1 | rs116120727 S9 | BRD2      | 4.89E-11 | 0.00199774  | 6.62E-08 | 4.07E-14 | 1.66E-06    | 2.85E-10 |
| phe.Fasting_rs192690040 S7 | DIAPH1 | rs116548615 S8 | TMEM45B   | 1.73E-16 | 7.06E-09    | 6.15E-13 | 8.70E-12 | 0.000354153 | 3.26E-08 |
| phe.Fasting_rs192690040 S7 | DIAPH1 | rs146815317 S5 | KPNA3     | 2.97E-15 | 1.21E-07    | 8.14E-12 | 1.18E-13 | 4.80E-06    | 7.06E-10 |
| phe.Fasting_rs192690040 S7 | DIAPH1 | rs150117838 S8 | KPNA3     | 2.97E-15 | 1.21E-07    | 8.14E-12 | 1.09E-13 | 4.44E-06    | 6.79E-10 |
| phe.Fasting_rs192690040 S7 | DIAPH1 | rs16894241 S4  | HIST1H2BK | 1.99E-11 | 0.000812315 | 2.96E-08 | 3.44E-14 | 1.40E-06    | 2.50E-10 |
| phe.Fasting_rs192690040 S7 | DIAPH1 | rs57503635 S3  | NA        | 6.34E-16 | 2.59E-08    | 1.95E-12 | 3.17E-14 | 1.29E-06    | 2.34E-10 |

|                           |        |             |     |           |          |             |          |          |             |          |
|---------------------------|--------|-------------|-----|-----------|----------|-------------|----------|----------|-------------|----------|
| phe.Fasting_rs192690040S7 | DIAPH1 | rs7256517   | S7  | CYTH2     | 1.04E-15 | 4.24E-08    | 3.06E-12 | 4.82E-12 | 0.000196022 | 1.91E-08 |
| phe.Fasting_rs192690040S7 | DIAPH1 | rs73392640  | S8  | POLR3B    | 2.02E-10 | 0.00826001  | 2.49E-07 | 5.19E-11 | 0.00211214  | 1.67E-07 |
| phe.Fasting_rs192690040S7 | DIAPH1 | rs73619637  | S8  | NA        | 1.44E-15 | 5.89E-08    | 4.14E-12 | 2.05E-10 | 0.00833668  | 5.78E-07 |
| phe.Fasting_rs192690040S7 | DIAPH1 | rs74914207  | S24 | NA        | 1.37E-10 | 0.00558626  | 1.73E-07 | 9.12E-11 | 0.0037135   | 2.80E-07 |
| phe.Fasting_rs192690040S7 | DIAPH1 | rs75758702  | S24 | NA        | 7.02E-17 | 2.87E-09    | 3.16E-13 | 1.57E-10 | 0.00638323  | 4.59E-07 |
| phe.Fasting_rs192690040S7 | DIAPH1 | rs7763107   | S8  | FARS2     | 5.78E-16 | 2.36E-08    | 1.79E-12 | 9.23E-12 | 0.000375564 | 3.44E-08 |
| phe.Fasting_rs192690040S7 | DIAPH1 | rs77798597  | S7  | KPNA3     | 2.97E-15 | 1.21E-07    | 8.14E-12 | 1.09E-13 | 4.44E-06    | 6.79E-10 |
| phe.Fasting_rs192690040S7 | DIAPH1 | rs78516788  | S8  | SLC38A1   | 2.75E-11 | 0.00112269  | 3.94E-08 | 2.44E-10 | 0.00992686  | 6.74E-07 |
| phe.Fasting_rs192690040S7 | DIAPH1 | rs78736524  | S5  | KPNA3     | 2.97E-15 | 1.21E-07    | 8.14E-12 | 1.18E-13 | 4.80E-06    | 7.06E-10 |
| phe.Fasting_rs192690040S7 | DIAPH1 | rs79781495  | S8  | KPNA3     | 2.97E-15 | 1.21E-07    | 8.14E-12 | 1.09E-13 | 4.44E-06    | 6.79E-10 |
| phe.Fasting_rs192690040S7 | DIAPH1 | rs80332465  | S5  | KPNA3     | 3.13E-15 | 1.28E-07    | 8.51E-12 | 1.17E-13 | 4.77E-06    | 7.06E-10 |
| phe.Fasting_rs192690040S7 | DIAPH1 | rs80334773  | S5  | KPNA3     | 3.13E-15 | 1.28E-07    | 8.51E-12 | 1.17E-13 | 4.77E-06    | 7.06E-10 |
| phe.Fasting_rs192765219S7 | DIAPH1 | rs115787552 | S5  | KPNA3     | 2.97E-15 | 1.21E-07    | 8.14E-12 | 1.18E-13 | 4.80E-06    | 7.06E-10 |
| phe.Fasting_rs192765219S7 | DIAPH1 | rs115888477 | S8  | NA        | 2.03E-14 | 8.28E-07    | 5.02E-11 | 2.21E-14 | 8.99E-07    | 1.73E-10 |
| phe.Fasting_rs192765219S7 | DIAPH1 | rs116011837 | S9  | BRD2      | 4.89E-11 | 0.00199774  | 6.62E-08 | 4.07E-14 | 1.66E-06    | 2.85E-10 |
| phe.Fasting_rs192765219S7 | DIAPH1 | rs116079984 | S8  | KPNA3     | 2.97E-15 | 1.21E-07    | 8.14E-12 | 1.24E-13 | 5.04E-06    | 7.34E-10 |
| phe.Fasting_rs192765219S7 | DIAPH1 | rs116120727 | S9  | BRD2      | 4.89E-11 | 0.00199774  | 6.62E-08 | 4.07E-14 | 1.66E-06    | 2.85E-10 |
| phe.Fasting_rs192765219S7 | DIAPH1 | rs116548615 | S8  | TMEM45B   | 1.73E-16 | 7.06E-09    | 6.15E-13 | 8.70E-12 | 0.000354153 | 3.26E-08 |
| phe.Fasting_rs192765219S7 | DIAPH1 | rs146815317 | S5  | KPNA3     | 2.97E-15 | 1.21E-07    | 8.14E-12 | 1.18E-13 | 4.80E-06    | 7.06E-10 |
| phe.Fasting_rs192765219S7 | DIAPH1 | rs150117838 | S8  | KPNA3     | 2.97E-15 | 1.21E-07    | 8.14E-12 | 1.09E-13 | 4.44E-06    | 6.79E-10 |
| phe.Fasting_rs192765219S7 | DIAPH1 | rs16894241  | S4  | HIST1H2BK | 1.99E-11 | 0.000812315 | 2.96E-08 | 3.44E-14 | 1.40E-06    | 2.50E-10 |
| phe.Fasting_rs192765219S7 | DIAPH1 | rs57503635  | S3  | NA        | 6.34E-16 | 2.59E-08    | 1.95E-12 | 3.17E-14 | 1.29E-06    | 2.34E-10 |
| phe.Fasting_rs192765219S7 | DIAPH1 | rs7256517   | S7  | CYTH2     | 1.04E-15 | 4.24E-08    | 3.06E-12 | 4.82E-12 | 0.000196022 | 1.91E-08 |
| phe.Fasting_rs192765219S7 | DIAPH1 | rs73392640  | S8  | POLR3B    | 2.02E-10 | 0.00826001  | 2.49E-07 | 5.19E-11 | 0.00211214  | 1.67E-07 |
| phe.Fasting_rs192765219S7 | DIAPH1 | rs73619637  | S8  | NA        | 1.44E-15 | 5.89E-08    | 4.14E-12 | 2.05E-10 | 0.00833668  | 5.78E-07 |
| phe.Fasting_rs192765219S7 | DIAPH1 | rs74914207  | S24 | NA        | 1.37E-10 | 0.00558626  | 1.73E-07 | 9.12E-11 | 0.0037135   | 2.80E-07 |
| phe.Fasting_rs192765219S7 | DIAPH1 | rs75758702  | S24 | NA        | 7.02E-17 | 2.87E-09    | 3.16E-13 | 1.57E-10 | 0.00638323  | 4.59E-07 |
| phe.Fasting_rs192765219S7 | DIAPH1 | rs7763107   | S8  | FARS2     | 5.78E-16 | 2.36E-08    | 1.79E-12 | 9.23E-12 | 0.000375564 | 3.44E-08 |
| phe.Fasting_rs192765219S7 | DIAPH1 | rs77798597  | S7  | KPNA3     | 2.97E-15 | 1.21E-07    | 8.14E-12 | 1.09E-13 | 4.44E-06    | 6.79E-10 |
| phe.Fasting_rs192765219S7 | DIAPH1 | rs78516788  | S8  | SLC38A1   | 2.75E-11 | 0.00112269  | 3.94E-08 | 2.44E-10 | 0.00992686  | 6.74E-07 |
| phe.Fasting_rs192765219S7 | DIAPH1 | rs78736524  | S5  | KPNA3     | 2.97E-15 | 1.21E-07    | 8.14E-12 | 1.18E-13 | 4.80E-06    | 7.06E-10 |
| phe.Fasting_rs192765219S7 | DIAPH1 | rs79781495  | S8  | KPNA3     | 2.97E-15 | 1.21E-07    | 8.14E-12 | 1.09E-13 | 4.44E-06    | 6.79E-10 |
| phe.Fasting_rs192765219S7 | DIAPH1 | rs80332465  | S5  | KPNA3     | 3.13E-15 | 1.28E-07    | 8.51E-12 | 1.17E-13 | 4.77E-06    | 7.06E-10 |
| phe.Fasting_rs192765219S7 | DIAPH1 | rs80334773  | S5  | KPNA3     | 3.13E-15 | 1.28E-07    | 8.51E-12 | 1.17E-13 | 4.77E-06    | 7.06E-10 |
| phe.Fasting_rs192770525S7 | DIAPH1 | rs115787552 | S5  | KPNA3     | 2.97E-15 | 1.21E-07    | 8.14E-12 | 1.18E-13 | 4.80E-06    | 7.06E-10 |
| phe.Fasting_rs192770525S7 | DIAPH1 | rs115888477 | S8  | NA        | 2.03E-14 | 8.28E-07    | 5.02E-11 | 2.21E-14 | 8.99E-07    | 1.73E-10 |
| phe.Fasting_rs192770525S7 | DIAPH1 | rs116011837 | S9  | BRD2      | 4.89E-11 | 0.00199774  | 6.62E-08 | 4.07E-14 | 1.66E-06    | 2.85E-10 |
| phe.Fasting_rs192770525S7 | DIAPH1 | rs116079984 | S8  | KPNA3     | 2.97E-15 | 1.21E-07    | 8.14E-12 | 1.24E-13 | 5.04E-06    | 7.34E-10 |
| phe.Fasting_rs192770525S7 | DIAPH1 | rs116120727 | S9  | BRD2      | 4.89E-11 | 0.00199774  | 6.62E-08 | 4.07E-14 | 1.66E-06    | 2.85E-10 |
| phe.Fasting_rs192770525S7 | DIAPH1 | rs116548615 | S8  | TMEM45B   | 1.73E-16 | 7.06E-09    | 6.15E-13 | 8.70E-12 | 0.000354153 | 3.26E-08 |

|                            |        |                |             |          |             |          |          |             |          |
|----------------------------|--------|----------------|-------------|----------|-------------|----------|----------|-------------|----------|
| phe.Fasting_rs192770525 S7 | DIAPH1 | rs146815317 S5 | KPNA3       | 2.97E-15 | 1.21E-07    | 8.14E-12 | 1.18E-13 | 4.80E-06    | 7.06E-10 |
| phe.Fasting_rs192770525 S7 | DIAPH1 | rs150117838 S8 | KPNA3       | 2.97E-15 | 1.21E-07    | 8.14E-12 | 1.09E-13 | 4.44E-06    | 6.79E-10 |
| phe.Fasting_rs192770525 S7 | DIAPH1 | rs16894241 S4  | HIST1H2BK   | 1.99E-11 | 0.000812315 | 2.96E-08 | 3.44E-14 | 1.40E-06    | 2.50E-10 |
| phe.Fasting_rs192770525 S7 | DIAPH1 | rs57503635 S3  | NA          | 6.34E-16 | 2.59E-08    | 1.95E-12 | 3.17E-14 | 1.29E-06    | 2.34E-10 |
| phe.Fasting_rs192770525 S7 | DIAPH1 | rs7256517 S7   | CYTH2       | 1.04E-15 | 4.24E-08    | 3.06E-12 | 4.82E-12 | 0.000196022 | 1.91E-08 |
| phe.Fasting_rs192770525 S7 | DIAPH1 | rs73392640 S8  | POLR3B      | 2.02E-10 | 0.00826001  | 2.49E-07 | 5.19E-11 | 0.00211214  | 1.67E-07 |
| phe.Fasting_rs192770525 S7 | DIAPH1 | rs73619637 S8  | NA          | 1.44E-15 | 5.89E-08    | 4.14E-12 | 2.05E-10 | 0.00833668  | 5.78E-07 |
| phe.Fasting_rs192770525 S7 | DIAPH1 | rs74914207 S24 | NA          | 1.37E-10 | 0.00558626  | 1.73E-07 | 9.12E-11 | 0.0037135   | 2.80E-07 |
| phe.Fasting_rs192770525 S7 | DIAPH1 | rs75758702 S24 | NA          | 7.02E-17 | 2.87E-09    | 3.16E-13 | 1.57E-10 | 0.00638323  | 4.59E-07 |
| phe.Fasting_rs192770525 S7 | DIAPH1 | rs7763107 S8   | FARS2       | 5.78E-16 | 2.36E-08    | 1.79E-12 | 9.23E-12 | 0.000375564 | 3.44E-08 |
| phe.Fasting_rs192770525 S7 | DIAPH1 | rs77798597 S7  | KPNA3       | 2.97E-15 | 1.21E-07    | 8.14E-12 | 1.09E-13 | 4.44E-06    | 6.79E-10 |
| phe.Fasting_rs192770525 S7 | DIAPH1 | rs78516788 S8  | SLC38A1     | 2.75E-11 | 0.00112269  | 3.94E-08 | 2.44E-10 | 0.00992686  | 6.74E-07 |
| phe.Fasting_rs192770525 S7 | DIAPH1 | rs78736524 S5  | KPNA3       | 2.97E-15 | 1.21E-07    | 8.14E-12 | 1.18E-13 | 4.80E-06    | 7.06E-10 |
| phe.Fasting_rs192770525 S7 | DIAPH1 | rs79781495 S8  | KPNA3       | 2.97E-15 | 1.21E-07    | 8.14E-12 | 1.09E-13 | 4.44E-06    | 6.79E-10 |
| phe.Fasting_rs192770525 S7 | DIAPH1 | rs80332465 S5  | KPNA3       | 3.13E-15 | 1.28E-07    | 8.51E-12 | 1.17E-13 | 4.77E-06    | 7.06E-10 |
| phe.Fasting_rs192770525 S7 | DIAPH1 | rs80334773 S5  | KPNA3       | 3.13E-15 | 1.28E-07    | 8.51E-12 | 1.17E-13 | 4.77E-06    | 7.06E-10 |
| phe.Fasting_rs2241292 S8   | GPR160 | rs116011837 S9 | BRD2        | 2.78E-13 | 1.13E-05    | 5.98E-10 | 2.39E-11 | 0.000974774 | 8.32E-08 |
| phe.Fasting_rs2241292 S8   | GPR160 | rs116120727 S9 | BRD2        | 2.78E-13 | 1.13E-05    | 5.98E-10 | 2.39E-11 | 0.000974774 | 8.32E-08 |
| phe.Fasting_rs2241292 S8   | GPR160 | rs141926074 S8 | ATE1        | 1.29E-19 | 5.27E-12    | 2.23E-14 | 1.52E-11 | 0.000620605 | 5.49E-08 |
| phe.Fasting_rs2924507 S5   | ZC3H3  | rs139070959 S8 | RPN2        | 1.38E-18 | 5.64E-11    | 3.38E-14 | 5.20E-15 | 2.12E-07    | 4.77E-11 |
| phe.Fasting_rs2924507 S5   | ZC3H3  | rs145412529 S8 | "RBL1,RPS3A | 7.67E-19 | 3.13E-11    | 2.70E-14 | 6.02E-15 | 2.45E-07    | 5.46E-11 |
| phe.Fasting_rs2924508 S8   | ZC3H3  | rs139070959 S8 | RPN2        | 1.38E-18 | 5.64E-11    | 3.38E-14 | 6.31E-15 | 2.57E-07    | 5.71E-11 |
| phe.Fasting_rs2924508 S8   | ZC3H3  | rs145412529 S8 | "RBL1,RPS3A | 7.67E-19 | 3.13E-11    | 2.70E-14 | 7.32E-15 | 2.98E-07    | 6.50E-11 |
| phe.Fasting_rs2924511 S7   | ZC3H3  | rs139070959 S8 | RPN2        | 1.38E-18 | 5.64E-11    | 3.38E-14 | 5.09E-15 | 2.07E-07    | 4.69E-11 |
| phe.Fasting_rs2924511 S7   | ZC3H3  | rs145412529 S8 | "RBL1,RPS3A | 7.67E-19 | 3.13E-11    | 2.70E-14 | 5.88E-15 | 2.40E-07    | 5.36E-11 |
| phe.Fasting_rs2924512 S7   | ZC3H3  | rs139070959 S8 | RPN2        | 1.57E-18 | 6.41E-11    | 3.60E-14 | 5.52E-15 | 2.25E-07    | 5.04E-11 |
| phe.Fasting_rs2924512 S7   | ZC3H3  | rs145412529 S8 | "RBL1,RPS3A | 8.77E-19 | 3.58E-11    | 2.75E-14 | 6.40E-15 | 2.61E-07    | 5.79E-11 |
| phe.Fasting_rs2956376 S8   | ZC3H3  | rs139070959 S8 | RPN2        | 1.38E-18 | 5.64E-11    | 3.38E-14 | 4.19E-15 | 1.70E-07    | 3.90E-11 |
| phe.Fasting_rs2956376 S8   | ZC3H3  | rs145412529 S8 | "RBL1,RPS3A | 7.67E-19 | 3.13E-11    | 2.70E-14 | 4.82E-15 | 1.96E-07    | 4.46E-11 |
| phe.Fasting_rs2980270 S7   | ZC3H3  | rs139070959 S8 | RPN2        | 1.38E-18 | 5.64E-11    | 3.38E-14 | 4.19E-15 | 1.70E-07    | 3.90E-11 |
| phe.Fasting_rs2980270 S7   | ZC3H3  | rs145412529 S8 | "RBL1,RPS3A | 7.67E-19 | 3.13E-11    | 2.70E-14 | 4.82E-15 | 1.96E-07    | 4.46E-11 |
| phe.Fasting_rs2980272 S7   | ZC3H3  | rs139070959 S8 | RPN2        | 1.57E-18 | 6.41E-11    | 3.60E-14 | 5.95E-15 | 2.42E-07    | 5.41E-11 |
| phe.Fasting_rs2980272 S7   | ZC3H3  | rs145412529 S8 | "RBL1,RPS3A | 8.77E-19 | 3.58E-11    | 2.75E-14 | 6.86E-15 | 2.79E-07    | 6.13E-11 |
| phe.Fasting_rs2980275 S5   | ZC3H3  | rs139070959 S8 | RPN2        | 1.38E-18 | 5.64E-11    | 3.38E-14 | 5.20E-15 | 2.12E-07    | 4.77E-11 |
| phe.Fasting_rs2980275 S5   | ZC3H3  | rs145412529 S8 | "RBL1,RPS3A | 7.67E-19 | 3.13E-11    | 2.70E-14 | 6.02E-15 | 2.45E-07    | 5.46E-11 |
| phe.Fasting_rs35990401 S7  | DIAPH1 | rs115787552 S5 | KPNA3       | 2.33E-15 | 9.53E-08    | 6.57E-12 | 4.20E-14 | 1.71E-06    | 2.93E-10 |
| phe.Fasting_rs35990401 S7  | DIAPH1 | rs115888477 S8 | NA          | 1.61E-14 | 6.59E-07    | 4.05E-11 | 7.57E-15 | 3.08E-07    | 6.71E-11 |
| phe.Fasting_rs35990401 S7  | DIAPH1 | rs116011837 S9 | BRD2        | 4.39E-11 | 0.00179411  | 6.00E-08 | 1.51E-14 | 6.13E-07    | 1.27E-10 |
| phe.Fasting_rs35990401 S7  | DIAPH1 | rs116079984 S8 | KPNA3       | 2.33E-15 | 9.53E-08    | 6.57E-12 | 4.41E-14 | 1.80E-06    | 3.07E-10 |
| phe.Fasting_rs35990401 S7  | DIAPH1 | rs116120727 S9 | BRD2        | 4.39E-11 | 0.00179411  | 6.00E-08 | 1.51E-14 | 6.13E-07    | 1.27E-10 |

|                        |    |        |             |     |             |          |             |          |          |             |          |
|------------------------|----|--------|-------------|-----|-------------|----------|-------------|----------|----------|-------------|----------|
| phe.Fasting_rs35990401 | S7 | DIAPH1 | rs116548615 | S8  | TMEM45B     | 1.34E-16 | 5.49E-09    | 5.35E-13 | 4.86E-12 | 0.000197863 | 1.92E-08 |
| phe.Fasting_rs35990401 | S7 | DIAPH1 | rs146815317 | S5  | KPNA3       | 2.33E-15 | 9.53E-08    | 6.57E-12 | 4.20E-14 | 1.71E-06    | 2.93E-10 |
| phe.Fasting_rs35990401 | S7 | DIAPH1 | rs150117838 | S8  | KPNA3       | 2.33E-15 | 9.53E-08    | 6.57E-12 | 3.88E-14 | 1.58E-06    | 2.77E-10 |
| phe.Fasting_rs35990401 | S7 | DIAPH1 | rs16894241  | S4  | HIST1H2BK   | 1.95E-11 | 0.000797308 | 2.91E-08 | 1.21E-14 | 4.92E-07    | 1.04E-10 |
| phe.Fasting_rs35990401 | S7 | DIAPH1 | rs57503635  | S3  | NA          | 5.14E-16 | 2.10E-08    | 1.62E-12 | 1.17E-14 | 4.77E-07    | 1.01E-10 |
| phe.Fasting_rs35990401 | S7 | DIAPH1 | rs7256517   | S7  | CYTH2       | 7.66E-16 | 3.13E-08    | 2.33E-12 | 1.66E-12 | 6.75E-05    | 7.38E-09 |
| phe.Fasting_rs35990401 | S7 | DIAPH1 | rs73392640  | S8  | POLR3B      | 2.09E-10 | 0.00851672  | 2.57E-07 | 1.81E-11 | 0.000735868 | 6.45E-08 |
| phe.Fasting_rs35990401 | S7 | DIAPH1 | rs74914207  | S24 | NA          | 1.27E-10 | 0.00520584  | 1.62E-07 | 3.83E-11 | 0.00156001  | 1.27E-07 |
| phe.Fasting_rs35990401 | S7 | DIAPH1 | rs75758702  | S24 | NA          | 5.25E-17 | 2.14E-09    | 2.57E-13 | 4.83E-11 | 0.00196695  | 1.56E-07 |
| phe.Fasting_rs35990401 | S7 | DIAPH1 | rs7763107   | S8  | FARS2       | 4.27E-16 | 1.75E-08    | 1.38E-12 | 2.93E-12 | 0.000119347 | 1.25E-08 |
| phe.Fasting_rs35990401 | S7 | DIAPH1 | rs77798597  | S7  | KPNA3       | 2.33E-15 | 9.53E-08    | 6.57E-12 | 3.88E-14 | 1.58E-06    | 2.77E-10 |
| phe.Fasting_rs35990401 | S7 | DIAPH1 | rs78516788  | S8  | SLC38A1     | 2.51E-11 | 0.0010242   | 3.64E-08 | 9.15E-11 | 0.0037246   | 2.81E-07 |
| phe.Fasting_rs35990401 | S7 | DIAPH1 | rs78697063  | S5  | MSI2        | 5.33E-19 | 2.17E-11    | 2.49E-14 | 2.11E-10 | 0.00860784  | 5.94E-07 |
| phe.Fasting_rs35990401 | S7 | DIAPH1 | rs78736524  | S5  | KPNA3       | 2.33E-15 | 9.53E-08    | 6.57E-12 | 4.20E-14 | 1.71E-06    | 2.93E-10 |
| phe.Fasting_rs35990401 | S7 | DIAPH1 | rs79781495  | S8  | KPNA3       | 2.33E-15 | 9.53E-08    | 6.57E-12 | 3.88E-14 | 1.58E-06    | 2.77E-10 |
| phe.Fasting_rs35990401 | S7 | DIAPH1 | rs80332465  | S5  | KPNA3       | 2.46E-15 | 1.01E-07    | 6.92E-12 | 4.18E-14 | 1.70E-06    | 2.93E-10 |
| phe.Fasting_rs35990401 | S7 | DIAPH1 | rs80334773  | S5  | KPNA3       | 2.46E-15 | 1.01E-07    | 6.92E-12 | 4.18E-14 | 1.70E-06    | 2.93E-10 |
| phe.Fasting_rs366767   | S5 | ZC3H3  | rs139070959 | S8  | RPN2        | 1.79E-18 | 7.31E-11    | 3.84E-14 | 4.54E-15 | 1.85E-07    | 4.22E-11 |
| phe.Fasting_rs366767   | S5 | ZC3H3  | rs145412529 | S8  | "RBL1,RPS3A | 9.93E-19 | 4.06E-11    | 2.92E-14 | 5.18E-15 | 2.11E-07    | 4.77E-11 |
| phe.Fasting_rs3772186  | S6 | PHC3   | rs116011837 | S9  | BRD2        | 2.70E-13 | 1.10E-05    | 5.81E-10 | 2.07E-11 | 0.000841008 | 7.31E-08 |
| phe.Fasting_rs3772186  | S6 | PHC3   | rs116120727 | S9  | BRD2        | 2.70E-13 | 1.10E-05    | 5.81E-10 | 2.07E-11 | 0.000841008 | 7.31E-08 |
| phe.Fasting_rs3772186  | S6 | PHC3   | rs141926074 | S8  | ATE1        | 1.23E-19 | 5.04E-12    | 2.23E-14 | 1.34E-11 | 0.000545558 | 4.89E-08 |
| phe.Fasting_rs55741453 | S8 | NEK1   | rs113357907 | S24 | ISL1        | 6.12E-18 | 2.50E-10    | 7.50E-14 | 9.34E-16 | 3.80E-08    | 1.16E-11 |
| phe.Fasting_rs55741453 | S8 | NEK1   | rs116011837 | S9  | BRD2        | 2.29E-17 | 9.34E-10    | 1.45E-13 | 2.21E-10 | 0.00900315  | 6.20E-07 |
| phe.Fasting_rs55741453 | S8 | NEK1   | rs116120727 | S9  | BRD2        | 2.29E-17 | 9.34E-10    | 1.45E-13 | 2.21E-10 | 0.00900315  | 6.20E-07 |
| phe.Fasting_rs55741453 | S8 | NEK1   | rs6881310   | S23 | ISL1        | 4.23E-17 | 1.73E-09    | 2.22E-13 | 2.34E-12 | 9.53E-05    | 1.01E-08 |
| phe.Fasting_rs55741453 | S8 | NEK1   | rs77444916  | S23 | LOC642366   | 1.50E-17 | 6.11E-10    | 1.18E-13 | 8.75E-16 | 3.56E-08    | 1.16E-11 |
| phe.Fasting_rs55741453 | S8 | NEK1   | rs80258830  | S24 | LOC642366   | 1.50E-17 | 6.11E-10    | 1.18E-13 | 8.75E-16 | 3.56E-08    | 1.16E-11 |
| phe.Fasting_rs55765964 | S8 | NEK1   | rs113357907 | S24 | ISL1        | 6.21E-18 | 2.54E-10    | 7.56E-14 | 9.34E-16 | 3.80E-08    | 1.16E-11 |
| phe.Fasting_rs55765964 | S8 | NEK1   | rs6881310   | S23 | ISL1        | 4.39E-17 | 1.79E-09    | 2.29E-13 | 2.34E-12 | 9.53E-05    | 1.01E-08 |
| phe.Fasting_rs55765964 | S8 | NEK1   | rs77444916  | S23 | LOC642366   | 1.55E-17 | 6.32E-10    | 1.20E-13 | 8.75E-16 | 3.56E-08    | 1.16E-11 |
| phe.Fasting_rs55765964 | S8 | NEK1   | rs80258830  | S24 | LOC642366   | 1.55E-17 | 6.32E-10    | 1.20E-13 | 8.75E-16 | 3.56E-08    | 1.16E-11 |
| phe.Fasting_rs55900860 | S7 | DIAPH1 | rs112089881 | S8  | ZFAND4      | 3.24E-18 | 1.32E-10    | 5.45E-14 | 1.95E-10 | 0.00795558  | 5.56E-07 |
| phe.Fasting_rs55900860 | S7 | DIAPH1 | rs115787552 | S5  | KPNA3       | 5.05E-16 | 2.06E-08    | 1.59E-12 | 2.34E-14 | 9.53E-07    | 1.79E-10 |
| phe.Fasting_rs55900860 | S7 | DIAPH1 | rs115888477 | S8  | NA          | 3.68E-15 | 1.50E-07    | 9.90E-12 | 4.11E-15 | 1.67E-07    | 3.84E-11 |
| phe.Fasting_rs55900860 | S7 | DIAPH1 | rs116011837 | S9  | BRD2        | 9.60E-12 | 0.000392176 | 1.53E-08 | 9.05E-15 | 3.68E-07    | 7.90E-11 |
| phe.Fasting_rs55900860 | S7 | DIAPH1 | rs116079984 | S8  | KPNA3       | 5.05E-16 | 2.06E-08    | 1.59E-12 | 2.56E-14 | 1.04E-06    | 1.94E-10 |
| phe.Fasting_rs55900860 | S7 | DIAPH1 | rs116120727 | S9  | BRD2        | 9.60E-12 | 0.000392176 | 1.53E-08 | 9.05E-15 | 3.68E-07    | 7.90E-11 |
| phe.Fasting_rs55900860 | S7 | DIAPH1 | rs116548615 | S8  | TMEM45B     | 2.95E-17 | 1.21E-09    | 1.69E-13 | 1.76E-12 | 7.17E-05    | 7.72E-09 |
| phe.Fasting_rs55900860 | S7 | DIAPH1 | rs146815317 | S5  | KPNA3       | 5.05E-16 | 2.06E-08    | 1.59E-12 | 2.34E-14 | 9.53E-07    | 1.79E-10 |

|                        |     |        |             |     |             |          |             |          |          |             |          |
|------------------------|-----|--------|-------------|-----|-------------|----------|-------------|----------|----------|-------------|----------|
| phe.Fasting_rs55900860 | S7  | DIAPH1 | rs150117838 | S8  | KPNA3       | 5.05E-16 | 2.06E-08    | 1.59E-12 | 2.16E-14 | 8.80E-07    | 1.71E-10 |
| phe.Fasting_rs55900860 | S7  | DIAPH1 | rs16894241  | S4  | HIST1H2BK   | 3.73E-12 | 0.000152384 | 6.73E-09 | 6.62E-15 | 2.69E-07    | 5.94E-11 |
| phe.Fasting_rs55900860 | S7  | DIAPH1 | rs57503635  | S3  | NA          | 1.28E-16 | 5.23E-09    | 5.19E-13 | 6.61E-15 | 2.69E-07    | 5.94E-11 |
| phe.Fasting_rs55900860 | S7  | DIAPH1 | rs7256517   | S7  | CYTH2       | 1.59E-16 | 6.48E-09    | 6.03E-13 | 9.69E-13 | 3.95E-05    | 4.59E-09 |
| phe.Fasting_rs55900860 | S7  | DIAPH1 | rs73392640  | S8  | POLR3B      | 4.58E-11 | 0.00187102  | 6.24E-08 | 6.82E-12 | 0.000277641 | 2.62E-08 |
| phe.Fasting_rs55900860 | S7  | DIAPH1 | rs74914207  | S24 | NA          | 2.89E-11 | 0.00117833  | 4.13E-08 | 1.56E-11 | 0.000634366 | 5.60E-08 |
| phe.Fasting_rs55900860 | S7  | DIAPH1 | rs75758702  | S24 | NA          | 1.04E-17 | 4.25E-10    | 9.89E-14 | 2.85E-11 | 0.00115844  | 9.77E-08 |
| phe.Fasting_rs55900860 | S7  | DIAPH1 | rs7763107   | S8  | FARS2       | 9.44E-17 | 3.86E-09    | 4.06E-13 | 1.60E-12 | 6.52E-05    | 7.13E-09 |
| phe.Fasting_rs55900860 | S7  | DIAPH1 | rs77798597  | S7  | KPNA3       | 5.05E-16 | 2.06E-08    | 1.59E-12 | 2.16E-14 | 8.80E-07    | 1.71E-10 |
| phe.Fasting_rs55900860 | S7  | DIAPH1 | rs78697063  | S5  | MSI2        | 7.77E-20 | 3.17E-12    | 2.23E-14 | 1.45E-10 | 0.00591847  | 4.35E-07 |
| phe.Fasting_rs55900860 | S7  | DIAPH1 | rs78736524  | S5  | KPNA3       | 5.05E-16 | 2.06E-08    | 1.59E-12 | 2.34E-14 | 9.53E-07    | 1.79E-10 |
| phe.Fasting_rs55900860 | S7  | DIAPH1 | rs79781495  | S8  | KPNA3       | 5.05E-16 | 2.06E-08    | 1.59E-12 | 2.16E-14 | 8.80E-07    | 1.71E-10 |
| phe.Fasting_rs55900860 | S7  | DIAPH1 | rs80332465  | S5  | KPNA3       | 5.36E-16 | 2.19E-08    | 1.67E-12 | 2.32E-14 | 9.45E-07    | 1.79E-10 |
| phe.Fasting_rs55900860 | S7  | DIAPH1 | rs80334773  | S5  | KPNA3       | 5.36E-16 | 2.19E-08    | 1.67E-12 | 2.32E-14 | 9.45E-07    | 1.79E-10 |
| phe.Fasting_rs57165556 | S8  | NEK1   | rs113357907 | S24 | ISL1        | 6.12E-18 | 2.50E-10    | 7.50E-14 | 9.34E-16 | 3.80E-08    | 1.16E-11 |
| phe.Fasting_rs57165556 | S8  | NEK1   | rs116011837 | S9  | BRD2        | 2.29E-17 | 9.34E-10    | 1.45E-13 | 2.21E-10 | 0.00900315  | 6.20E-07 |
| phe.Fasting_rs57165556 | S8  | NEK1   | rs116120727 | S9  | BRD2        | 2.29E-17 | 9.34E-10    | 1.45E-13 | 2.21E-10 | 0.00900315  | 6.20E-07 |
| phe.Fasting_rs57165556 | S8  | NEK1   | rs6881310   | S23 | ISL1        | 4.23E-17 | 1.73E-09    | 2.22E-13 | 2.34E-12 | 9.53E-05    | 1.01E-08 |
| phe.Fasting_rs57165556 | S8  | NEK1   | rs77444916  | S23 | LOC642366   | 1.50E-17 | 6.11E-10    | 1.18E-13 | 8.75E-16 | 3.56E-08    | 1.16E-11 |
| phe.Fasting_rs57165556 | S8  | NEK1   | rs80258830  | S24 | LOC642366   | 1.50E-17 | 6.11E-10    | 1.18E-13 | 8.75E-16 | 3.56E-08    | 1.16E-11 |
| phe.Fasting_rs57287019 | S5  | CLCN3  | rs113357907 | S24 | ISL1        | 5.36E-17 | 2.19E-09    | 2.62E-13 | 4.72E-13 | 1.92E-05    | 2.49E-09 |
| phe.Fasting_rs57287019 | S5  | CLCN3  | rs6881310   | S23 | ISL1        | 3.54E-16 | 1.45E-08    | 1.16E-12 | 5.77E-11 | 0.00234866  | 1.84E-07 |
| phe.Fasting_rs57287019 | S5  | CLCN3  | rs77444916  | S23 | LOC642366   | 1.19E-16 | 4.86E-09    | 4.89E-13 | 4.41E-13 | 1.80E-05    | 2.36E-09 |
| phe.Fasting_rs57287019 | S5  | CLCN3  | rs80258830  | S24 | LOC642366   | 1.19E-16 | 4.86E-09    | 4.89E-13 | 4.41E-13 | 1.80E-05    | 2.36E-09 |
| phe.Fasting_rs57503635 | S3  | NA     | rs139070959 | S8  | RPN2        | 5.04E-17 | 2.06E-09    | 2.48E-13 | 1.75E-10 | 0.00714015  | 5.04E-07 |
| phe.Fasting_rs57503635 | S3  | NA     | rs145412529 | S8  | "RBL1,RPS3A | 2.98E-17 | 1.22E-09    | 1.70E-13 | 1.96E-10 | 0.00797955  | 5.58E-07 |
| phe.Fasting_rs58286737 | S8  | NEK1   | rs113357907 | S24 | ISL1        | 6.12E-18 | 2.50E-10    | 7.50E-14 | 4.03E-16 | 1.64E-08    | 1.16E-11 |
| phe.Fasting_rs58286737 | S8  | NEK1   | rs116011837 | S9  | BRD2        | 2.29E-17 | 9.34E-10    | 1.45E-13 | 8.57E-11 | 0.00348829  | 2.64E-07 |
| phe.Fasting_rs58286737 | S8  | NEK1   | rs116120727 | S9  | BRD2        | 2.29E-17 | 9.34E-10    | 1.45E-13 | 8.57E-11 | 0.00348829  | 2.64E-07 |
| phe.Fasting_rs58286737 | S8  | NEK1   | rs6881310   | S23 | ISL1        | 4.23E-17 | 1.73E-09    | 2.22E-13 | 8.72E-13 | 3.55E-05    | 4.15E-09 |
| phe.Fasting_rs58286737 | S8  | NEK1   | rs77444916  | S23 | LOC642366   | 1.50E-17 | 6.11E-10    | 1.18E-13 | 3.78E-16 | 1.54E-08    | 1.16E-11 |
| phe.Fasting_rs58286737 | S8  | NEK1   | rs80258830  | S24 | LOC642366   | 1.50E-17 | 6.11E-10    | 1.18E-13 | 3.78E-16 | 1.54E-08    | 1.16E-11 |
| phe.Fasting_rs58417766 | S7  | PHC3   | rs116011837 | S9  | BRD2        | 2.70E-13 | 1.10E-05    | 5.81E-10 | 2.07E-11 | 0.000841008 | 7.31E-08 |
| phe.Fasting_rs58417766 | S7  | PHC3   | rs116120727 | S9  | BRD2        | 2.70E-13 | 1.10E-05    | 5.81E-10 | 2.07E-11 | 0.000841008 | 7.31E-08 |
| phe.Fasting_rs58417766 | S7  | PHC3   | rs141926074 | S8  | ATE1        | 1.23E-19 | 5.04E-12    | 2.23E-14 | 1.34E-11 | 0.000545558 | 4.89E-08 |
| phe.Fasting_rs60011869 | S16 | NA     | rs139070959 | S8  | RPN2        | 6.07E-18 | 2.48E-10    | 7.49E-14 | 5.74E-11 | 0.00233779  | 1.84E-07 |
| phe.Fasting_rs60011869 | S16 | NA     | rs145412529 | S8  | "RBL1,RPS3A | 3.45E-18 | 1.41E-10    | 5.60E-14 | 6.57E-11 | 0.00267324  | 2.08E-07 |
| phe.Fasting_rs60011869 | S16 | NA     | rs57503635  | S3  | NA          | 7.45E-17 | 3.04E-09    | 3.33E-13 | 5.95E-13 | 2.42E-05    | 2.94E-09 |
| phe.Fasting_rs61267727 | S8  | NEK1   | rs113357907 | S24 | ISL1        | 6.12E-18 | 2.50E-10    | 7.50E-14 | 4.03E-16 | 1.64E-08    | 1.16E-11 |
| phe.Fasting_rs61267727 | S8  | NEK1   | rs116011837 | S9  | BRD2        | 2.29E-17 | 9.34E-10    | 1.45E-13 | 8.57E-11 | 0.00348829  | 2.64E-07 |



|                        |     |       |             |     |           |          |          |          |          |             |          |
|------------------------|-----|-------|-------------|-----|-----------|----------|----------|----------|----------|-------------|----------|
| phe.Fasting_rs61267727 | S8  | NEK1  | rs116120727 | S9  | BRD2      | 2.29E-17 | 9.34E-10 | 1.45E-13 | 8.57E-11 | 0.00348829  | 2.64E-07 |
| phe.Fasting_rs61267727 | S8  | NEK1  | rs6881310   | S23 | ISL1      | 4.23E-17 | 1.73E-09 | 2.22E-13 | 8.72E-13 | 3.55E-05    | 4.15E-09 |
| phe.Fasting_rs61267727 | S8  | NEK1  | rs77444916  | S23 | LOC642366 | 1.50E-17 | 6.11E-10 | 1.18E-13 | 3.78E-16 | 1.54E-08    | 1.16E-11 |
| phe.Fasting_rs61267727 | S8  | NEK1  | rs80258830  | S24 | LOC642366 | 1.50E-17 | 6.11E-10 | 1.18E-13 | 3.78E-16 | 1.54E-08    | 1.16E-11 |
| phe.Fasting_rs61613048 | S8  | MYO1B | rs113357907 | S24 | ISL1      | 1.17E-16 | 4.79E-09 | 4.85E-13 | 9.36E-15 | 3.81E-07    | 8.15E-11 |
| phe.Fasting_rs61613048 | S8  | MYO1B | rs13400525  | S8  | MFF       | 1.94E-15 | 7.94E-08 | 5.54E-12 | 1.22E-10 | 0.00498048  | 3.70E-07 |
| phe.Fasting_rs61613048 | S8  | MYO1B | rs141926074 | S8  | ATE1      | 1.72E-17 | 7.03E-10 | 1.28E-13 | 8.15E-12 | 0.000331646 | 3.07E-08 |
| phe.Fasting_rs61613048 | S8  | MYO1B | rs6881310   | S23 | ISL1      | 7.38E-16 | 3.01E-08 | 2.25E-12 | 3.70E-12 | 0.000150673 | 1.54E-08 |
| phe.Fasting_rs61613048 | S8  | MYO1B | rs73619637  | S8  | NA        | 1.26E-15 | 5.15E-08 | 3.67E-12 | 1.42E-15 | 5.78E-08    | 1.60E-11 |
| phe.Fasting_rs61613048 | S8  | MYO1B | rs75758702  | S24 | NA        | 1.04E-16 | 4.26E-09 | 4.42E-13 | 7.87E-12 | 0.000320329 | 2.98E-08 |
| phe.Fasting_rs61613048 | S8  | MYO1B | rs77444916  | S23 | LOC642366 | 2.55E-16 | 1.04E-08 | 8.62E-13 | 8.90E-15 | 3.62E-07    | 7.81E-11 |
| phe.Fasting_rs61613048 | S8  | MYO1B | rs80258830  | S24 | LOC642366 | 2.55E-16 | 1.04E-08 | 8.62E-13 | 8.90E-15 | 3.62E-07    | 7.81E-11 |
| phe.Fasting_rs6553443  | S8  | NEK1  | rs113357907 | S24 | ISL1      | 6.12E-18 | 2.50E-10 | 7.50E-14 | 9.34E-16 | 3.80E-08    | 1.16E-11 |
| phe.Fasting_rs6553443  | S8  | NEK1  | rs116011837 | S9  | BRD2      | 2.29E-17 | 9.34E-10 | 1.45E-13 | 2.21E-10 | 0.00900315  | 6.20E-07 |
| phe.Fasting_rs6553443  | S8  | NEK1  | rs116120727 | S9  | BRD2      | 2.29E-17 | 9.34E-10 | 1.45E-13 | 2.21E-10 | 0.00900315  | 6.20E-07 |
| phe.Fasting_rs6553443  | S8  | NEK1  | rs6881310   | S23 | ISL1      | 4.23E-17 | 1.73E-09 | 2.22E-13 | 2.34E-12 | 9.53E-05    | 1.01E-08 |
| phe.Fasting_rs6553443  | S8  | NEK1  | rs77444916  | S23 | LOC642366 | 1.50E-17 | 6.11E-10 | 1.18E-13 | 8.75E-16 | 3.56E-08    | 1.16E-11 |
| phe.Fasting_rs6553443  | S8  | NEK1  | rs80258830  | S24 | LOC642366 | 1.50E-17 | 6.11E-10 | 1.18E-13 | 8.75E-16 | 3.56E-08    | 1.16E-11 |
| phe.Fasting_rs6763396  | S5  | PHC3  | rs116011837 | S9  | BRD2      | 2.95E-13 | 1.21E-05 | 6.34E-10 | 2.12E-11 | 0.000864406 | 7.47E-08 |
| phe.Fasting_rs6763396  | S5  | PHC3  | rs116120727 | S9  | BRD2      | 2.95E-13 | 1.21E-05 | 6.34E-10 | 2.12E-11 | 0.000864406 | 7.47E-08 |
| phe.Fasting_rs6763396  | S5  | PHC3  | rs141926074 | S8  | ATE1      | 1.28E-19 | 5.21E-12 | 2.23E-14 | 1.38E-11 | 0.000562151 | 5.01E-08 |
| phe.Fasting_rs6781454  | S8  | PHC3  | rs116011837 | S9  | BRD2      | 2.77E-13 | 1.13E-05 | 5.95E-10 | 2.10E-11 | 0.000853749 | 7.39E-08 |
| phe.Fasting_rs6781454  | S8  | PHC3  | rs116120727 | S9  | BRD2      | 2.77E-13 | 1.13E-05 | 5.95E-10 | 2.10E-11 | 0.000853749 | 7.39E-08 |
| phe.Fasting_rs6781454  | S8  | PHC3  | rs141926074 | S8  | ATE1      | 1.26E-19 | 5.15E-12 | 2.23E-14 | 1.36E-11 | 0.00055511  | 4.95E-08 |
| phe.Fasting_rs6786022  | S8  | PHC3  | rs116011837 | S9  | BRD2      | 4.93E-13 | 2.01E-05 | 1.04E-09 | 2.60E-11 | 0.0010602   | 8.99E-08 |
| phe.Fasting_rs6786022  | S8  | PHC3  | rs116120727 | S9  | BRD2      | 4.93E-13 | 2.01E-05 | 1.04E-09 | 2.60E-11 | 0.0010602   | 8.99E-08 |
| phe.Fasting_rs6808506  | S7  | PHC3  | rs116011837 | S9  | BRD2      | 2.70E-13 | 1.10E-05 | 5.81E-10 | 2.07E-11 | 0.000841008 | 7.31E-08 |
| phe.Fasting_rs6808506  | S7  | PHC3  | rs116120727 | S9  | BRD2      | 2.70E-13 | 1.10E-05 | 5.81E-10 | 2.07E-11 | 0.000841008 | 7.31E-08 |
| phe.Fasting_rs6808506  | S7  | PHC3  | rs141926074 | S8  | ATE1      | 1.23E-19 | 5.04E-12 | 2.23E-14 | 1.34E-11 | 0.000545558 | 4.89E-08 |
| phe.Fasting_rs6822970  | S8  | NEK1  | rs113357907 | S24 | ISL1      | 6.12E-18 | 2.50E-10 | 7.50E-14 | 9.34E-16 | 3.80E-08    | 1.16E-11 |
| phe.Fasting_rs6822970  | S8  | NEK1  | rs116011837 | S9  | BRD2      | 2.29E-17 | 9.34E-10 | 1.45E-13 | 2.21E-10 | 0.00900315  | 6.20E-07 |
| phe.Fasting_rs6822970  | S8  | NEK1  | rs116120727 | S9  | BRD2      | 2.29E-17 | 9.34E-10 | 1.45E-13 | 2.21E-10 | 0.00900315  | 6.20E-07 |
| phe.Fasting_rs6822970  | S8  | NEK1  | rs6881310   | S23 | ISL1      | 4.23E-17 | 1.73E-09 | 2.22E-13 | 2.34E-12 | 9.53E-05    | 1.01E-08 |
| phe.Fasting_rs6822970  | S8  | NEK1  | rs77444916  | S23 | LOC642366 | 1.50E-17 | 6.11E-10 | 1.18E-13 | 8.75E-16 | 3.56E-08    | 1.16E-11 |
| phe.Fasting_rs6822970  | S8  | NEK1  | rs80258830  | S24 | LOC642366 | 1.50E-17 | 6.11E-10 | 1.18E-13 | 8.75E-16 | 3.56E-08    | 1.16E-11 |
| phe.Fasting_rs6822970  | S8  | NEK1  | rs113357907 | S24 | ISL1      | 6.12E-18 | 2.50E-10 | 7.50E-14 | 4.03E-16 | 1.64E-08    | 1.16E-11 |
| phe.Fasting_rs6829220  | S20 | NEK1  | rs116011837 | S9  | BRD2      | 2.29E-17 | 9.34E-10 | 1.45E-13 | 8.57E-11 | 0.00348829  | 2.64E-07 |
| phe.Fasting_rs6829220  | S20 | NEK1  | rs116120727 | S9  | BRD2      | 2.29E-17 | 9.34E-10 | 1.45E-13 | 8.57E-11 | 0.00348829  | 2.64E-07 |
| phe.Fasting_rs6829220  | S20 | NEK1  | rs6881310   | S23 | ISL1      | 4.23E-17 | 1.73E-09 | 2.22E-13 | 8.72E-13 | 3.55E-05    | 4.15E-09 |
| phe.Fasting_rs6829220  | S20 | NEK1  | rs77444916  | S23 | LOC642366 | 1.50E-17 | 6.11E-10 | 1.18E-13 | 3.78E-16 | 1.54E-08    | 1.16E-11 |

|                        |     |        |             |     |             |          |             |          |          |             |          |
|------------------------|-----|--------|-------------|-----|-------------|----------|-------------|----------|----------|-------------|----------|
| phe.Fasting_rs6829220  | S20 | NEK1   | rs80258830  | S24 | LOC642366   | 1.50E-17 | 6.11E-10    | 1.18E-13 | 3.78E-16 | 1.54E-08    | 1.16E-11 |
| phe.Fasting_rs6881310  | S23 | ISL1   | rs111576333 | S5  | TMEM64      | 1.08E-16 | 4.40E-09    | 4.54E-13 | 2.77E-12 | 0.000112791 | 1.18E-08 |
| phe.Fasting_rs6881310  | S23 | ISL1   | rs112091318 | S5  | TMEM64      | 3.20E-17 | 1.31E-09    | 1.80E-13 | 3.90E-12 | 0.000158821 | 1.61E-08 |
| phe.Fasting_rs6881310  | S23 | ISL1   | rs114565620 | S8  | RCL1        | 7.36E-17 | 3.01E-09    | 3.30E-13 | 5.29E-16 | 2.16E-08    | 1.16E-11 |
| phe.Fasting_rs6881310  | S23 | ISL1   | rs115787552 | S5  | KPNA3       | 7.90E-16 | 3.23E-08    | 2.39E-12 | 5.45E-11 | 0.00221813  | 1.75E-07 |
| phe.Fasting_rs6881310  | S23 | ISL1   | rs115888477 | S8  | NA          | 5.37E-15 | 2.19E-07    | 1.40E-11 | 7.87E-12 | 0.000320516 | 2.98E-08 |
| phe.Fasting_rs6881310  | S23 | ISL1   | rs116011837 | S9  | BRD2        | 6.72E-17 | 2.74E-09    | 3.07E-13 | 2.73E-12 | 0.000111142 | 1.17E-08 |
| phe.Fasting_rs6881310  | S23 | ISL1   | rs116079984 | S8  | KPNA3       | 7.90E-16 | 3.23E-08    | 2.39E-12 | 6.53E-11 | 0.00265964  | 2.06E-07 |
| phe.Fasting_rs6881310  | S23 | ISL1   | rs116120727 | S9  | BRD2        | 6.72E-17 | 2.74E-09    | 3.07E-13 | 2.73E-12 | 0.000111142 | 1.17E-08 |
| phe.Fasting_rs6881310  | S23 | ISL1   | rs11989304  | S4  | TMEM64      | 1.08E-16 | 4.40E-09    | 4.54E-13 | 2.68E-12 | 0.000109081 | 1.15E-08 |
| phe.Fasting_rs6881310  | S23 | ISL1   | rs141926074 | S8  | ATE1        | 1.62E-17 | 6.61E-10    | 1.24E-13 | 9.17E-15 | 3.73E-07    | 8.00E-11 |
| phe.Fasting_rs6881310  | S23 | ISL1   | rs146815317 | S5  | KPNA3       | 7.90E-16 | 3.23E-08    | 2.39E-12 | 5.45E-11 | 0.00221813  | 1.75E-07 |
| phe.Fasting_rs6881310  | S23 | ISL1   | rs150117838 | S8  | KPNA3       | 7.90E-16 | 3.23E-08    | 2.39E-12 | 5.14E-11 | 0.00209292  | 1.66E-07 |
| phe.Fasting_rs6881310  | S23 | ISL1   | rs57503635  | S3  | NA          | 1.73E-12 | 7.08E-05    | 3.32E-09 | 7.11E-11 | 0.00289423  | 2.23E-07 |
| phe.Fasting_rs6881310  | S23 | ISL1   | rs73283603  | S7  | ZWINT       | 2.97E-16 | 1.21E-08    | 9.90E-13 | 5.59E-16 | 2.27E-08    | 1.16E-11 |
| phe.Fasting_rs6881310  | S23 | ISL1   | rs75350765  | S5  | RCL1        | 7.36E-17 | 3.01E-09    | 3.30E-13 | 5.29E-16 | 2.16E-08    | 1.16E-11 |
| phe.Fasting_rs6881310  | S23 | ISL1   | rs75758702  | S24 | NA          | 1.62E-17 | 6.61E-10    | 1.24E-13 | 1.39E-17 | 5.67E-10    | 2.12E-12 |
| phe.Fasting_rs6881310  | S23 | ISL1   | rs75949566  | S5  | TMEM64      | 1.11E-16 | 4.52E-09    | 4.65E-13 | 4.23E-12 | 0.000172242 | 1.70E-08 |
| phe.Fasting_rs6881310  | S23 | ISL1   | rs77798597  | S7  | KPNA3       | 7.90E-16 | 3.23E-08    | 2.39E-12 | 5.14E-11 | 0.00209292  | 1.66E-07 |
| phe.Fasting_rs6881310  | S23 | ISL1   | rs77845645  | S21 | NA          | 5.07E-13 | 2.07E-05    | 1.07E-09 | 1.13E-15 | 4.59E-08    | 1.30E-11 |
| phe.Fasting_rs6881310  | S23 | ISL1   | rs78697063  | S5  | MSI2        | 1.75E-19 | 7.13E-12    | 2.40E-14 | 5.76E-12 | 0.000234647 | 2.25E-08 |
| phe.Fasting_rs6881310  | S23 | ISL1   | rs78736524  | S5  | KPNA3       | 7.90E-16 | 3.23E-08    | 2.39E-12 | 5.45E-11 | 0.00221813  | 1.75E-07 |
| phe.Fasting_rs6881310  | S23 | ISL1   | rs78990344  | S2  | LOC1005063  | 1.08E-16 | 4.40E-09    | 4.54E-13 | 2.68E-12 | 0.000109081 | 1.15E-08 |
| phe.Fasting_rs6881310  | S23 | ISL1   | rs79781495  | S8  | KPNA3       | 7.90E-16 | 3.23E-08    | 2.39E-12 | 5.14E-11 | 0.00209292  | 1.66E-07 |
| phe.Fasting_rs6881310  | S23 | ISL1   | rs80332465  | S5  | KPNA3       | 8.53E-16 | 3.48E-08    | 2.55E-12 | 5.35E-11 | 0.00217737  | 1.72E-07 |
| phe.Fasting_rs6881310  | S23 | ISL1   | rs80334773  | S5  | KPNA3       | 8.53E-16 | 3.48E-08    | 2.55E-12 | 5.35E-11 | 0.00217737  | 1.72E-07 |
| phe.Fasting_rs7004597  | S8  | NA     | rs73619637  | S8  | NA          | 3.31E-14 | 1.35E-06    | 8.02E-11 | 3.71E-11 | 0.00151073  | 1.23E-07 |
| phe.Fasting_rs717886   | S8  | NA     | rs141692339 | S3  | "PCDHGA6,PI | 3.74E-15 | 1.53E-07    | 1.00E-11 | 7.70E-12 | 0.000313295 | 2.92E-08 |
| phe.Fasting_rs717886   | S8  | NA     | rs150992994 | S11 | "PCDHGA5,PI | 3.75E-14 | 1.53E-06    | 9.03E-11 | 1.81E-11 | 0.000737294 | 6.46E-08 |
| phe.Fasting_rs718215   | S8  | NA     | rs141692339 | S3  | "PCDHGA6,PI | 4.01E-15 | 1.64E-07    | 1.06E-11 | 7.80E-12 | 0.000317304 | 2.96E-08 |
| phe.Fasting_rs718215   | S8  | NA     | rs150992994 | S11 | "PCDHGA5,PI | 4.01E-14 | 1.64E-06    | 9.63E-11 | 1.84E-11 | 0.000747904 | 6.55E-08 |
| phe.Fasting_rs718215   | S8  | NA     | rs60011869  | S16 | NA          | 9.46E-12 | 0.000386498 | 1.52E-08 | 1.16E-13 | 4.71E-06    | 7.06E-10 |
| phe.Fasting_rs73058677 | S5  | MYO1B  | rs113357907 | S24 | ISL1        | 9.16E-17 | 3.74E-09    | 3.95E-13 | 7.23E-15 | 2.94E-07    | 6.43E-11 |
| phe.Fasting_rs73058677 | S5  | MYO1B  | rs13400525  | S8  | MFF         | 1.15E-15 | 4.69E-08    | 3.37E-12 | 7.83E-11 | 0.00318582  | 2.44E-07 |
| phe.Fasting_rs73058677 | S5  | MYO1B  | rs141926074 | S8  | ATE1        | 1.60E-17 | 6.51E-10    | 1.22E-13 | 6.10E-12 | 0.000248306 | 2.36E-08 |
| phe.Fasting_rs73058677 | S5  | MYO1B  | rs6881310   | S23 | ISL1        | 5.93E-16 | 2.42E-08    | 1.84E-12 | 2.67E-12 | 0.000108628 | 1.14E-08 |
| phe.Fasting_rs73058677 | S5  | MYO1B  | rs75758702  | S24 | NA          | 7.83E-17 | 3.20E-09    | 3.47E-13 | 5.38E-12 | 0.000218866 | 2.11E-08 |
| phe.Fasting_rs73058677 | S5  | MYO1B  | rs77444916  | S23 | LOC642366   | 2.06E-16 | 8.39E-09    | 7.10E-13 | 6.87E-15 | 2.80E-07    | 6.14E-11 |
| phe.Fasting_rs73058677 | S5  | MYO1B  | rs80258830  | S24 | LOC642366   | 2.06E-16 | 8.39E-09    | 7.10E-13 | 6.87E-15 | 2.80E-07    | 6.14E-11 |
| phe.Fasting_rs73392640 | S8  | POLR3B | rs115305957 | S23 | NA          | 2.53E-16 | 1.03E-08    | 8.58E-13 | 3.40E-24 | 1.39E-16    | 4.62E-17 |

|                        |     |            |             |     |           |          |          |          |          |             |          |
|------------------------|-----|------------|-------------|-----|-----------|----------|----------|----------|----------|-------------|----------|
| phe.Fasting_rs73392640 | S8  | POLR3B     | rs74701059  | S24 | C17orf102 | 2.57E-16 | 1.05E-08 | 8.69E-13 | 6.55E-24 | 2.67E-16    | 6.66E-17 |
| phe.Fasting_rs73392640 | S8  | POLR3B     | rs79703349  | S24 | C17orf102 | 2.57E-16 | 1.05E-08 | 8.69E-13 | 9.28E-24 | 3.78E-16    | 7.56E-17 |
| phe.Fasting_rs73794928 | S13 | "PCDHGA9,P | rs78697063  | S5  | MSI2      | 1.35E-19 | 5.51E-12 | 2.29E-14 | 8.58E-11 | 0.00349174  | 2.65E-07 |
| phe.Fasting_rs73864708 | S8  | NEK1       | rs113357907 | S24 | ISL1      | 6.12E-18 | 2.50E-10 | 7.50E-14 | 9.34E-16 | 3.80E-08    | 1.16E-11 |
| phe.Fasting_rs73864708 | S8  | NEK1       | rs116011837 | S9  | BRD2      | 2.29E-17 | 9.34E-10 | 1.45E-13 | 2.21E-10 | 0.00900315  | 6.20E-07 |
| phe.Fasting_rs73864708 | S8  | NEK1       | rs116120727 | S9  | BRD2      | 2.29E-17 | 9.34E-10 | 1.45E-13 | 2.21E-10 | 0.00900315  | 6.20E-07 |
| phe.Fasting_rs73864708 | S8  | NEK1       | rs6881310   | S23 | ISL1      | 4.23E-17 | 1.73E-09 | 2.22E-13 | 2.34E-12 | 9.53E-05    | 1.01E-08 |
| phe.Fasting_rs73864708 | S8  | NEK1       | rs77444916  | S23 | LOC642366 | 1.50E-17 | 6.11E-10 | 1.18E-13 | 8.75E-16 | 3.56E-08    | 1.16E-11 |
| phe.Fasting_rs73864708 | S8  | NEK1       | rs80258830  | S24 | LOC642366 | 1.50E-17 | 6.11E-10 | 1.18E-13 | 8.75E-16 | 3.56E-08    | 1.16E-11 |
| phe.Fasting_rs73864714 | S8  | NEK1       | rs113357907 | S24 | ISL1      | 6.12E-18 | 2.50E-10 | 7.50E-14 | 9.34E-16 | 3.80E-08    | 1.16E-11 |
| phe.Fasting_rs73864714 | S8  | NEK1       | rs116011837 | S9  | BRD2      | 2.29E-17 | 9.34E-10 | 1.45E-13 | 2.21E-10 | 0.00900315  | 6.20E-07 |
| phe.Fasting_rs73864714 | S8  | NEK1       | rs116120727 | S9  | BRD2      | 2.29E-17 | 9.34E-10 | 1.45E-13 | 2.21E-10 | 0.00900315  | 6.20E-07 |
| phe.Fasting_rs73864714 | S8  | NEK1       | rs6881310   | S23 | ISL1      | 4.23E-17 | 1.73E-09 | 2.22E-13 | 2.34E-12 | 9.53E-05    | 1.01E-08 |
| phe.Fasting_rs73864714 | S8  | NEK1       | rs77444916  | S23 | LOC642366 | 1.50E-17 | 6.11E-10 | 1.18E-13 | 8.75E-16 | 3.56E-08    | 1.16E-11 |
| phe.Fasting_rs73864714 | S8  | NEK1       | rs80258830  | S24 | LOC642366 | 1.50E-17 | 6.11E-10 | 1.18E-13 | 8.75E-16 | 3.56E-08    | 1.16E-11 |
| phe.Fasting_rs73864724 | S8  | NEK1       | rs113357907 | S24 | ISL1      | 6.12E-18 | 2.50E-10 | 7.50E-14 | 8.90E-16 | 3.62E-08    | 1.16E-11 |
| phe.Fasting_rs73864724 | S8  | NEK1       | rs116011837 | S9  | BRD2      | 2.29E-17 | 9.34E-10 | 1.45E-13 | 2.23E-10 | 0.00906089  | 6.23E-07 |
| phe.Fasting_rs73864724 | S8  | NEK1       | rs116120727 | S9  | BRD2      | 2.29E-17 | 9.34E-10 | 1.45E-13 | 2.23E-10 | 0.00906089  | 6.23E-07 |
| phe.Fasting_rs73864724 | S8  | NEK1       | rs6881310   | S23 | ISL1      | 4.23E-17 | 1.73E-09 | 2.22E-13 | 2.33E-12 | 9.47E-05    | 1.00E-08 |
| phe.Fasting_rs73864724 | S8  | NEK1       | rs77444916  | S23 | LOC642366 | 1.50E-17 | 6.11E-10 | 1.18E-13 | 8.34E-16 | 3.40E-08    | 1.16E-11 |
| phe.Fasting_rs73864724 | S8  | NEK1       | rs80258830  | S24 | LOC642366 | 1.50E-17 | 6.11E-10 | 1.18E-13 | 8.34E-16 | 3.40E-08    | 1.16E-11 |
| phe.Fasting_rs73864726 | S8  | NEK1       | rs113357907 | S24 | ISL1      | 6.12E-18 | 2.50E-10 | 7.50E-14 | 1.27E-15 | 5.16E-08    | 1.44E-11 |
| phe.Fasting_rs73864726 | S8  | NEK1       | rs6881310   | S23 | ISL1      | 4.23E-17 | 1.73E-09 | 2.22E-13 | 3.40E-12 | 0.000138444 | 1.43E-08 |
| phe.Fasting_rs73864726 | S8  | NEK1       | rs77444916  | S23 | LOC642366 | 1.50E-17 | 6.11E-10 | 1.18E-13 | 1.19E-15 | 4.84E-08    | 1.36E-11 |
| phe.Fasting_rs73864726 | S8  | NEK1       | rs80258830  | S24 | LOC642366 | 1.50E-17 | 6.11E-10 | 1.18E-13 | 1.19E-15 | 4.84E-08    | 1.36E-11 |
| phe.Fasting_rs73864731 | S5  | NEK1       | rs113357907 | S24 | ISL1      | 1.21E-17 | 4.92E-10 | 1.05E-13 | 1.27E-15 | 5.16E-08    | 1.44E-11 |
| phe.Fasting_rs73864731 | S5  | NEK1       | rs6881310   | S23 | ISL1      | 8.19E-17 | 3.35E-09 | 3.59E-13 | 3.40E-12 | 0.000138444 | 1.43E-08 |
| phe.Fasting_rs73864731 | S5  | NEK1       | rs77444916  | S23 | LOC642366 | 2.90E-17 | 1.18E-09 | 1.66E-13 | 1.19E-15 | 4.84E-08    | 1.36E-11 |
| phe.Fasting_rs73864731 | S5  | NEK1       | rs80258830  | S24 | LOC642366 | 2.90E-17 | 1.18E-09 | 1.66E-13 | 1.19E-15 | 4.84E-08    | 1.36E-11 |
| phe.Fasting_rs73864732 | S8  | NEK1       | rs113357907 | S24 | ISL1      | 1.35E-17 | 5.51E-10 | 1.11E-13 | 1.21E-15 | 4.92E-08    | 1.38E-11 |
| phe.Fasting_rs73864732 | S8  | NEK1       | rs116011837 | S9  | BRD2      | 5.27E-17 | 2.15E-09 | 2.57E-13 | 1.69E-10 | 0.00686251  | 4.88E-07 |
| phe.Fasting_rs73864732 | S8  | NEK1       | rs116120727 | S9  | BRD2      | 5.27E-17 | 2.15E-09 | 2.57E-13 | 1.69E-10 | 0.00686251  | 4.88E-07 |
| phe.Fasting_rs73864732 | S8  | NEK1       | rs6881310   | S23 | ISL1      | 9.11E-17 | 3.72E-09 | 3.94E-13 | 3.29E-12 | 0.000134008 | 1.39E-08 |
| phe.Fasting_rs73864732 | S8  | NEK1       | rs77444916  | S23 | LOC642366 | 3.24E-17 | 1.32E-09 | 1.81E-13 | 1.13E-15 | 4.62E-08    | 1.30E-11 |
| phe.Fasting_rs73864732 | S8  | NEK1       | rs80258830  | S24 | LOC642366 | 3.24E-17 | 1.32E-09 | 1.81E-13 | 1.13E-15 | 4.62E-08    | 1.30E-11 |
| phe.Fasting_rs73864740 | S2  | NA         | rs113357907 | S24 | ISL1      | 1.30E-17 | 5.33E-10 | 1.09E-13 | 1.21E-15 | 4.92E-08    | 1.38E-11 |
| phe.Fasting_rs73864740 | S2  | NA         | rs116011837 | S9  | BRD2      | 5.05E-17 | 2.06E-09 | 2.49E-13 | 1.69E-10 | 0.00686251  | 4.88E-07 |
| phe.Fasting_rs73864740 | S2  | NA         | rs116120727 | S9  | BRD2      | 5.05E-17 | 2.06E-09 | 2.49E-13 | 1.69E-10 | 0.00686251  | 4.88E-07 |
| phe.Fasting_rs73864740 | S2  | NA         | rs6881310   | S23 | ISL1      | 8.85E-17 | 3.61E-09 | 3.83E-13 | 3.29E-12 | 0.000134008 | 1.39E-08 |
| phe.Fasting_rs73864740 | S2  | NA         | rs77444916  | S23 | LOC642366 | 3.15E-17 | 1.29E-09 | 1.77E-13 | 1.13E-15 | 4.62E-08    | 1.30E-11 |

|                        |     |        |             |     |             |          |          |          |          |             |          |
|------------------------|-----|--------|-------------|-----|-------------|----------|----------|----------|----------|-------------|----------|
| phe.Fasting_rs73864740 | S2  | NA     | rs80258830  | S24 | LOC642366   | 3.15E-17 | 1.29E-09 | 1.77E-13 | 1.13E-15 | 4.62E-08    | 1.30E-11 |
| phe.Fasting_rs73864759 | S8  | CLCN3  | rs113357907 | S24 | ISL1        | 3.21E-18 | 1.31E-10 | 5.44E-14 | 6.03E-16 | 2.45E-08    | 1.16E-11 |
| phe.Fasting_rs73864759 | S8  | CLCN3  | rs116011837 | S9  | BRD2        | 1.28E-17 | 5.24E-10 | 1.08E-13 | 1.59E-10 | 0.00649019  | 4.65E-07 |
| phe.Fasting_rs73864759 | S8  | CLCN3  | rs116120727 | S9  | BRD2        | 1.28E-17 | 5.24E-10 | 1.08E-13 | 1.59E-10 | 0.00649019  | 4.65E-07 |
| phe.Fasting_rs73864759 | S8  | CLCN3  | rs6881310   | S23 | ISL1        | 2.32E-17 | 9.49E-10 | 1.47E-13 | 1.40E-12 | 5.72E-05    | 6.34E-09 |
| phe.Fasting_rs73864759 | S8  | CLCN3  | rs77444916  | S23 | LOC642366   | 8.01E-18 | 3.27E-10 | 8.58E-14 | 5.65E-16 | 2.30E-08    | 1.16E-11 |
| phe.Fasting_rs73864759 | S8  | CLCN3  | rs80258830  | S24 | LOC642366   | 8.01E-18 | 3.27E-10 | 8.58E-14 | 5.65E-16 | 2.30E-08    | 1.16E-11 |
| phe.Fasting_rs73879173 | S8  | PHC3   | rs116011837 | S9  | BRD2        | 2.70E-13 | 1.10E-05 | 5.81E-10 | 2.07E-11 | 0.000841008 | 7.31E-08 |
| phe.Fasting_rs73879173 | S8  | PHC3   | rs116120727 | S9  | BRD2        | 2.70E-13 | 1.10E-05 | 5.81E-10 | 2.07E-11 | 0.000841008 | 7.31E-08 |
| phe.Fasting_rs73879173 | S8  | PHC3   | rs141926074 | S8  | ATE1        | 1.23E-19 | 5.04E-12 | 2.23E-14 | 1.34E-11 | 0.000545558 | 4.89E-08 |
| phe.Fasting_rs73879178 | S10 | PHC3   | rs116011837 | S9  | BRD2        | 4.93E-13 | 2.01E-05 | 1.04E-09 | 2.60E-11 | 0.0010602   | 8.99E-08 |
| phe.Fasting_rs73879178 | S10 | PHC3   | rs116120727 | S9  | BRD2        | 4.93E-13 | 2.01E-05 | 1.04E-09 | 2.60E-11 | 0.0010602   | 8.99E-08 |
| phe.Fasting_rs73879182 | S6  | PHC3   | rs116011837 | S9  | BRD2        | 2.70E-13 | 1.10E-05 | 5.81E-10 | 2.07E-11 | 0.000841008 | 7.31E-08 |
| phe.Fasting_rs73879182 | S6  | PHC3   | rs116120727 | S9  | BRD2        | 2.70E-13 | 1.10E-05 | 5.81E-10 | 2.07E-11 | 0.000841008 | 7.31E-08 |
| phe.Fasting_rs73879182 | S6  | PHC3   | rs141926074 | S8  | ATE1        | 1.23E-19 | 5.04E-12 | 2.23E-14 | 1.34E-11 | 0.000545558 | 4.89E-08 |
| phe.Fasting_rs74986829 | S8  | NEK1   | rs113357907 | S24 | ISL1        | 6.12E-18 | 2.50E-10 | 7.50E-14 | 1.27E-15 | 5.16E-08    | 1.44E-11 |
| phe.Fasting_rs74986829 | S8  | NEK1   | rs6881310   | S23 | ISL1        | 4.23E-17 | 1.73E-09 | 2.22E-13 | 3.40E-12 | 0.000138444 | 1.43E-08 |
| phe.Fasting_rs74986829 | S8  | NEK1   | rs77444916  | S23 | LOC642366   | 1.50E-17 | 6.11E-10 | 1.18E-13 | 1.19E-15 | 4.84E-08    | 1.36E-11 |
| phe.Fasting_rs74986829 | S8  | NEK1   | rs80258830  | S24 | LOC642366   | 1.50E-17 | 6.11E-10 | 1.18E-13 | 1.19E-15 | 4.84E-08    | 1.36E-11 |
| phe.Fasting_rs75350765 | S5  | RCL1   | rs115083290 | S19 | NA          | 2.89E-17 | 1.18E-09 | 1.66E-13 | 3.20E-14 | 1.30E-06    | 2.35E-10 |
| phe.Fasting_rs75350765 | S5  | RCL1   | rs115752779 | S19 | NA          | 2.89E-17 | 1.18E-09 | 1.66E-13 | 3.20E-14 | 1.30E-06    | 2.35E-10 |
| phe.Fasting_rs75350765 | S5  | RCL1   | rs139070959 | S8  | RPN2        | 5.03E-18 | 2.06E-10 | 6.86E-14 | 9.04E-15 | 3.68E-07    | 7.90E-11 |
| phe.Fasting_rs75350765 | S5  | RCL1   | rs145412529 | S8  | "RBL1,RPS3A | 2.94E-18 | 1.20E-10 | 5.06E-14 | 1.03E-14 | 4.19E-07    | 8.92E-11 |
| phe.Fasting_rs75350765 | S5  | RCL1   | rs57503635  | S3  | NA          | 4.19E-17 | 1.71E-09 | 2.22E-13 | 1.28E-21 | 5.23E-14    | 4.02E-15 |
| phe.Fasting_rs75350765 | S5  | RCL1   | rs73619637  | S8  | NA          | 5.38E-17 | 2.20E-09 | 2.63E-13 | 4.57E-11 | 0.00185897  | 1.49E-07 |
| phe.Fasting_rs75374128 | S5  | CNTLN  | rs139070959 | S8  | RPN2        | 1.05E-17 | 4.28E-10 | 9.93E-14 | 3.36E-12 | 0.000136888 | 1.42E-08 |
| phe.Fasting_rs75758702 | S24 | NA     | rs73619637  | S8  | NA          | 4.24E-17 | 1.73E-09 | 2.22E-13 | 2.23E-19 | 9.08E-12    | 3.49E-13 |
| phe.Fasting_rs75864203 | S8  | CNTLN  | rs139070959 | S8  | RPN2        | 1.05E-17 | 4.28E-10 | 9.93E-14 | 3.36E-12 | 0.000136888 | 1.42E-08 |
| phe.Fasting_rs75949566 | S5  | TMEM64 | rs73283603  | S7  | ZWINT       | 3.41E-16 | 1.39E-08 | 1.13E-12 | 9.14E-11 | 0.00371982  | 2.80E-07 |
| phe.Fasting_rs76146702 | S5  | PHC3   | rs116011837 | S9  | BRD2        | 3.20E-13 | 1.31E-05 | 6.85E-10 | 1.54E-11 | 0.00062499  | 5.53E-08 |
| phe.Fasting_rs76146702 | S5  | PHC3   | rs116120727 | S9  | BRD2        | 3.20E-13 | 1.31E-05 | 6.85E-10 | 1.54E-11 | 0.00062499  | 5.53E-08 |
| phe.Fasting_rs76146702 | S5  | PHC3   | rs116548615 | S8  | TMEM45B     | 1.72E-18 | 7.00E-11 | 3.71E-14 | 2.09E-10 | 0.00851021  | 5.89E-07 |
| phe.Fasting_rs76146702 | S5  | PHC3   | rs141926074 | S8  | ATE1        | 1.66E-19 | 6.78E-12 | 2.40E-14 | 8.65E-11 | 0.00352252  | 2.67E-07 |
| phe.Fasting_rs7615039  | S8  | PHC3   | rs116011837 | S9  | BRD2        | 2.39E-13 | 9.74E-06 | 5.15E-10 | 3.34E-11 | 0.00135925  | 1.12E-07 |
| phe.Fasting_rs7615039  | S8  | PHC3   | rs116120727 | S9  | BRD2        | 2.39E-13 | 9.74E-06 | 5.15E-10 | 3.34E-11 | 0.00135925  | 1.12E-07 |
| phe.Fasting_rs7615039  | S8  | PHC3   | rs141926074 | S8  | ATE1        | 1.10E-19 | 4.51E-12 | 2.23E-14 | 2.10E-11 | 0.000854079 | 7.39E-08 |
| phe.Fasting_rs7638400  | S7  | PHC3   | rs116011837 | S9  | BRD2        | 2.70E-13 | 1.10E-05 | 5.81E-10 | 2.07E-11 | 0.000841008 | 7.31E-08 |
| phe.Fasting_rs7638400  | S7  | PHC3   | rs116120727 | S9  | BRD2        | 2.70E-13 | 1.10E-05 | 5.81E-10 | 2.07E-11 | 0.000841008 | 7.31E-08 |
| phe.Fasting_rs7638400  | S7  | PHC3   | rs141926074 | S8  | ATE1        | 1.23E-19 | 5.04E-12 | 2.23E-14 | 1.34E-11 | 0.000545558 | 4.89E-08 |
| phe.Fasting_rs76542405 | S5  | SPTLC1 | rs12581352  | S2  | NA          | 7.63E-18 | 3.12E-10 | 8.49E-14 | 2.07E-13 | 8.42E-06    | 1.15E-09 |

|                        |     |           |              |     |           |          |             |          |          |             |          |
|------------------------|-----|-----------|--------------|-----|-----------|----------|-------------|----------|----------|-------------|----------|
| phe.Fasting_rs7657672  | S8  | CLCN3     | rs113357907  | S24 | ISL1      | 5.58E-17 | 2.28E-09    | 2.68E-13 | 5.69E-13 | 2.32E-05    | 2.82E-09 |
| phe.Fasting_rs7657672  | S8  | CLCN3     | rs182965141  | S8  | DIAPH1    | 1.81E-14 | 7.38E-07    | 4.52E-11 | 1.47E-10 | 0.00598212  | 4.39E-07 |
| phe.Fasting_rs7657672  | S8  | CLCN3     | rs6881310    | S23 | ISL1      | 3.07E-12 | 0.000125534 | 5.63E-09 | 7.01E-11 | 0.00285495  | 2.20E-07 |
| phe.Fasting_rs7657672  | S8  | CLCN3     | rs77444916   | S23 | LOC642366 | 1.23E-16 | 5.01E-09    | 5.00E-13 | 5.32E-13 | 2.17E-05    | 2.65E-09 |
| phe.Fasting_rs7657672  | S8  | CLCN3     | rs80258830   | S24 | LOC642366 | 1.23E-16 | 5.01E-09    | 5.00E-13 | 5.32E-13 | 2.17E-05    | 2.65E-09 |
| phe.Fasting_rs76737663 | S1  | LOC654841 | rs57503635   | S3  | NA        | 1.33E-16 | 5.42E-09    | 5.30E-13 | 2.03E-32 | 8.25E-25    | 4.52E-25 |
| phe.Fasting_rs7675011  | S8  | NEK1      | rs113357907  | S24 | ISL1      | 6.12E-18 | 2.50E-10    | 7.50E-14 | 1.27E-15 | 5.16E-08    | 1.44E-11 |
| phe.Fasting_rs7675011  | S8  | NEK1      | rs6881310    | S23 | ISL1      | 4.23E-17 | 1.73E-09    | 2.22E-13 | 3.40E-12 | 0.000138444 | 1.43E-08 |
| phe.Fasting_rs7675011  | S8  | NEK1      | rs77444916   | S23 | LOC642366 | 1.50E-17 | 6.11E-10    | 1.18E-13 | 1.19E-15 | 4.84E-08    | 1.36E-11 |
| phe.Fasting_rs7675011  | S8  | NEK1      | rs80258830   | S24 | LOC642366 | 1.50E-17 | 6.11E-10    | 1.18E-13 | 1.19E-15 | 4.84E-08    | 1.36E-11 |
| phe.Fasting_rs76844308 | S8  | CNTLN     | rs139070959  | S8  | RPN2      | 3.76E-18 | 1.54E-10    | 5.76E-14 | 3.24E-12 | 0.000131982 | 1.37E-08 |
| phe.Fasting_rs76844308 | S8  | CNTLN     | rs57503635   | S3  | NA        | 4.62E-17 | 1.89E-09    | 2.34E-13 | 6.15E-16 | 2.50E-08    | 1.16E-11 |
| phe.Fasting_rs7690583  | S8  | NEK1      | rs113357907  | S24 | ISL1      | 6.12E-18 | 2.50E-10    | 7.50E-14 | 8.90E-16 | 3.62E-08    | 1.16E-11 |
| phe.Fasting_rs7690583  | S8  | NEK1      | rs116011837  | S9  | BRD2      | 2.29E-17 | 9.34E-10    | 1.45E-13 | 2.23E-10 | 0.00906089  | 6.23E-07 |
| phe.Fasting_rs7690583  | S8  | NEK1      | rs116120727  | S9  | BRD2      | 2.29E-17 | 9.34E-10    | 1.45E-13 | 2.23E-10 | 0.00906089  | 6.23E-07 |
| phe.Fasting_rs7690583  | S8  | NEK1      | rs6881310    | S23 | ISL1      | 4.23E-17 | 1.73E-09    | 2.22E-13 | 2.33E-12 | 9.47E-05    | 1.00E-08 |
| phe.Fasting_rs7690583  | S8  | NEK1      | rs77444916   | S23 | LOC642366 | 1.50E-17 | 6.11E-10    | 1.18E-13 | 8.34E-16 | 3.40E-08    | 1.16E-11 |
| phe.Fasting_rs7690583  | S8  | NEK1      | rs80258830   | S24 | LOC642366 | 1.50E-17 | 6.11E-10    | 1.18E-13 | 8.34E-16 | 3.40E-08    | 1.16E-11 |
| phe.Fasting_rs77444916 | S23 | LOC642366 | rs111576333  | S5  | TMEM64    | 3.76E-17 | 1.53E-09    | 2.04E-13 | 6.78E-15 | 2.76E-07    | 6.06E-11 |
| phe.Fasting_rs77444916 | S23 | LOC642366 | rs112091318  | S5  | TMEM64    | 1.13E-17 | 4.62E-10    | 1.02E-13 | 8.04E-15 | 3.27E-07    | 7.10E-11 |
| phe.Fasting_rs77444916 | S23 | LOC642366 | rs1144334325 | S7  | AP3M2     | 1.30E-11 | 0.000530003 | 2.02E-08 | 4.93E-15 | 2.01E-07    | 4.56E-11 |
| phe.Fasting_rs77444916 | S23 | LOC642366 | rs114394395  | S7  | AP3M2     | 1.35E-11 | 0.00055115  | 2.09E-08 | 4.93E-15 | 2.01E-07    | 4.56E-11 |
| phe.Fasting_rs77444916 | S23 | LOC642366 | rs114565620  | S8  | RCL1      | 2.52E-17 | 1.03E-09    | 1.56E-13 | 5.48E-15 | 2.23E-07    | 5.01E-11 |
| phe.Fasting_rs77444916 | S23 | LOC642366 | rs115305957  | S23 | NA        | 1.48E-17 | 6.03E-10    | 1.17E-13 | 3.16E-15 | 1.29E-07    | 3.03E-11 |
| phe.Fasting_rs77444916 | S23 | LOC642366 | rs115787552  | S5  | KPNA3     | 2.72E-16 | 1.11E-08    | 9.14E-13 | 3.09E-14 | 1.26E-06    | 2.29E-10 |
| phe.Fasting_rs77444916 | S23 | LOC642366 | rs115888477  | S8  | NA        | 1.85E-15 | 7.54E-08    | 5.27E-12 | 5.33E-15 | 2.17E-07    | 4.88E-11 |
| phe.Fasting_rs77444916 | S23 | LOC642366 | rs116011837  | S9  | BRD2      | 2.31E-17 | 9.43E-10    | 1.46E-13 | 2.99E-13 | 1.22E-05    | 1.64E-09 |
| phe.Fasting_rs77444916 | S23 | LOC642366 | rs116079984  | S8  | KPNA3     | 2.72E-16 | 1.11E-08    | 9.14E-13 | 3.49E-14 | 1.42E-06    | 2.53E-10 |
| phe.Fasting_rs77444916 | S23 | LOC642366 | rs116120727  | S9  | BRD2      | 2.31E-17 | 9.43E-10    | 1.46E-13 | 2.99E-13 | 1.22E-05    | 1.64E-09 |
| phe.Fasting_rs77444916 | S23 | LOC642366 | rs116406581  | S2  | NA        | 5.35E-11 | 0.00218631  | 7.23E-08 | 3.94E-15 | 1.60E-07    | 3.70E-11 |
| phe.Fasting_rs77444916 | S23 | LOC642366 | rs116696844  | S3  | AP3M2     | 1.83E-11 | 0.000748556 | 2.76E-08 | 4.93E-15 | 2.01E-07    | 4.56E-11 |
| phe.Fasting_rs77444916 | S23 | LOC642366 | rs11989304   | S4  | TMEM64    | 3.76E-17 | 1.53E-09    | 2.04E-13 | 6.48E-15 | 2.64E-07    | 5.85E-11 |
| phe.Fasting_rs77444916 | S23 | LOC642366 | rs141926074  | S8  | ATE1      | 5.64E-18 | 2.30E-10    | 7.14E-14 | 8.39E-14 | 3.41E-06    | 5.61E-10 |
| phe.Fasting_rs77444916 | S23 | LOC642366 | rs146815317  | S5  | KPNA3     | 2.72E-16 | 1.11E-08    | 9.14E-13 | 3.09E-14 | 1.26E-06    | 2.29E-10 |
| phe.Fasting_rs77444916 | S23 | LOC642366 | rs1470889    | S5  | ZC3H3     | 3.47E-18 | 1.42E-10    | 5.60E-14 | 2.19E-13 | 8.93E-06    | 1.21E-09 |
| phe.Fasting_rs77444916 | S23 | LOC642366 | rs1470890    | S5  | ZC3H3     | 3.47E-18 | 1.42E-10    | 5.60E-14 | 2.19E-13 | 8.93E-06    | 1.21E-09 |
| phe.Fasting_rs77444916 | S23 | LOC642366 | rs150117838  | S8  | KPNA3     | 2.72E-16 | 1.11E-08    | 9.14E-13 | 2.88E-14 | 1.17E-06    | 2.16E-10 |
| phe.Fasting_rs77444916 | S23 | LOC642366 | rs17494290   | S5  | CDH2      | 3.23E-19 | 1.32E-11    | 2.40E-14 | 2.27E-12 | 9.32E-05    | 9.79E-09 |
| phe.Fasting_rs77444916 | S23 | LOC642366 | rs2924507    | S5  | ZC3H3     | 3.47E-18 | 1.42E-10    | 5.60E-14 | 2.19E-13 | 8.93E-06    | 1.21E-09 |
| phe.Fasting_rs77444916 | S23 | LOC642366 | rs2924508    | S8  | ZC3H3     | 3.47E-18 | 1.42E-10    | 5.60E-14 | 3.11E-13 | 1.27E-05    | 1.70E-09 |

|                        |     |           |             |     |             |          |             |          |          |             |          |
|------------------------|-----|-----------|-------------|-----|-------------|----------|-------------|----------|----------|-------------|----------|
| phe.Fasting_rs77444916 | S23 | LOC642366 | rs2924511   | S7  | ZC3H3       | 3.47E-18 | 1.42E-10    | 5.60E-14 | 1.97E-13 | 8.01E-06    | 1.10E-09 |
| phe.Fasting_rs77444916 | S23 | LOC642366 | rs2924512   | S7  | ZC3H3       | 3.97E-18 | 1.62E-10    | 5.99E-14 | 2.29E-13 | 9.30E-06    | 1.26E-09 |
| phe.Fasting_rs77444916 | S23 | LOC642366 | rs2956376   | S8  | ZC3H3       | 3.47E-18 | 1.42E-10    | 5.60E-14 | 1.33E-13 | 5.43E-06    | 7.77E-10 |
| phe.Fasting_rs77444916 | S23 | LOC642366 | rs2980270   | S7  | ZC3H3       | 3.47E-18 | 1.42E-10    | 5.60E-14 | 1.33E-13 | 5.43E-06    | 7.77E-10 |
| phe.Fasting_rs77444916 | S23 | LOC642366 | rs2980272   | S7  | ZC3H3       | 3.97E-18 | 1.62E-10    | 5.99E-14 | 2.52E-13 | 1.03E-05    | 1.39E-09 |
| phe.Fasting_rs77444916 | S23 | LOC642366 | rs2980275   | S5  | ZC3H3       | 3.47E-18 | 1.42E-10    | 5.60E-14 | 2.19E-13 | 8.93E-06    | 1.21E-09 |
| phe.Fasting_rs77444916 | S23 | LOC642366 | rs366767    | S5  | ZC3H3       | 4.74E-18 | 1.93E-10    | 6.62E-14 | 1.49E-13 | 6.06E-06    | 8.45E-10 |
| phe.Fasting_rs77444916 | S23 | LOC642366 | rs57503635  | S3  | NA          | 8.73E-17 | 3.57E-09    | 3.79E-13 | 1.25E-14 | 5.07E-07    | 1.07E-10 |
| phe.Fasting_rs77444916 | S23 | LOC642366 | rs7004597   | S8  | NA          | 1.30E-11 | 0.000530003 | 2.02E-08 | 3.39E-15 | 1.38E-07    | 3.24E-11 |
| phe.Fasting_rs77444916 | S23 | LOC642366 | rs7256517   | S7  | CYTH2       | 1.01E-16 | 4.11E-09    | 4.28E-13 | 8.71E-15 | 3.55E-07    | 7.66E-11 |
| phe.Fasting_rs77444916 | S23 | LOC642366 | rs73283603  | S7  | ZWINT       | 9.84E-17 | 4.02E-09    | 4.21E-13 | 5.66E-15 | 2.30E-07    | 5.16E-11 |
| phe.Fasting_rs77444916 | S23 | LOC642366 | rs73392640  | S8  | POLR3B      | 1.50E-16 | 6.14E-09    | 5.83E-13 | 9.36E-12 | 0.000380943 | 3.49E-08 |
| phe.Fasting_rs77444916 | S23 | LOC642366 | rs74627895  | S8  | TMEM64      | 1.13E-17 | 4.62E-10    | 1.02E-13 | 3.94E-15 | 1.60E-07    | 3.70E-11 |
| phe.Fasting_rs77444916 | S23 | LOC642366 | rs74701059  | S24 | C17orf102   | 1.50E-17 | 6.14E-10    | 1.18E-13 | 3.22E-15 | 1.31E-07    | 3.09E-11 |
| phe.Fasting_rs77444916 | S23 | LOC642366 | rs74914207  | S24 | NA          | 3.46E-12 | 0.000141389 | 6.28E-09 | 1.58E-11 | 0.000644651 | 5.68E-08 |
| phe.Fasting_rs77444916 | S23 | LOC642366 | rs75350765  | S5  | RCL1        | 2.52E-17 | 1.03E-09    | 1.56E-13 | 5.48E-15 | 2.23E-07    | 5.01E-11 |
| phe.Fasting_rs77444916 | S23 | LOC642366 | rs75374128  | S5  | CNTLN       | 1.14E-17 | 4.66E-10    | 1.02E-13 | 8.56E-11 | 0.00348551  | 2.64E-07 |
| phe.Fasting_rs77444916 | S23 | LOC642366 | rs75758702  | S24 | NA          | 5.36E-18 | 2.19E-10    | 7.01E-14 | 1.92E-16 | 7.80E-09    | 7.61E-12 |
| phe.Fasting_rs77444916 | S23 | LOC642366 | rs75864203  | S8  | CNTLN       | 1.14E-17 | 4.66E-10    | 1.02E-13 | 8.56E-11 | 0.00348551  | 2.64E-07 |
| phe.Fasting_rs77444916 | S23 | LOC642366 | rs75949566  | S5  | TMEM64      | 3.79E-17 | 1.55E-09    | 2.05E-13 | 9.41E-15 | 3.83E-07    | 8.18E-11 |
| phe.Fasting_rs77444916 | S23 | LOC642366 | rs7763107   | S8  | FARS2       | 6.68E-17 | 2.73E-09    | 3.05E-13 | 1.29E-15 | 5.24E-08    | 1.46E-11 |
| phe.Fasting_rs77444916 | S23 | LOC642366 | rs77798597  | S7  | KPNA3       | 2.72E-16 | 1.11E-08    | 9.14E-13 | 2.88E-14 | 1.17E-06    | 2.16E-10 |
| phe.Fasting_rs77444916 | S23 | LOC642366 | rs77845645  | S21 | NA          | 1.59E-17 | 6.50E-10    | 1.22E-13 | 1.19E-14 | 4.85E-07    | 1.02E-10 |
| phe.Fasting_rs77444916 | S23 | LOC642366 | rs78353402  | S8  | AP3M2       | 1.30E-11 | 0.000530003 | 2.02E-08 | 4.93E-15 | 2.01E-07    | 4.56E-11 |
| phe.Fasting_rs77444916 | S23 | LOC642366 | rs78516788  | S8  | SLC38A1     | 1.33E-17 | 5.43E-10    | 1.10E-13 | 1.01E-14 | 4.10E-07    | 8.74E-11 |
| phe.Fasting_rs77444916 | S23 | LOC642366 | rs78697063  | S5  | MSI2        | 5.49E-20 | 2.24E-12    | 2.23E-14 | 3.16E-15 | 1.28E-07    | 3.03E-11 |
| phe.Fasting_rs77444916 | S23 | LOC642366 | rs78722272  | S5  | CNTLN       | 1.14E-17 | 4.66E-10    | 1.02E-13 | 8.46E-11 | 0.00344297  | 2.62E-07 |
| phe.Fasting_rs77444916 | S23 | LOC642366 | rs78736524  | S5  | KPNA3       | 2.72E-16 | 1.11E-08    | 9.14E-13 | 3.09E-14 | 1.26E-06    | 2.29E-10 |
| phe.Fasting_rs77444916 | S23 | LOC642366 | rs78990344  | S2  | LOC10050631 | 3.76E-17 | 1.53E-09    | 2.04E-13 | 6.48E-15 | 2.64E-07    | 5.85E-11 |
| phe.Fasting_rs77444916 | S23 | LOC642366 | rs79703349  | S24 | C17orf102   | 1.50E-17 | 6.14E-10    | 1.18E-13 | 3.66E-15 | 1.49E-07    | 3.48E-11 |
| phe.Fasting_rs77444916 | S23 | LOC642366 | rs79781495  | S8  | KPNA3       | 2.72E-16 | 1.11E-08    | 9.14E-13 | 2.88E-14 | 1.17E-06    | 2.16E-10 |
| phe.Fasting_rs77444916 | S23 | LOC642366 | rs80332465  | S5  | KPNA3       | 2.95E-16 | 1.21E-08    | 9.83E-13 | 3.02E-14 | 1.23E-06    | 2.25E-10 |
| phe.Fasting_rs77444916 | S23 | LOC642366 | rs80334773  | S5  | KPNA3       | 2.95E-16 | 1.21E-08    | 9.83E-13 | 3.02E-14 | 1.23E-06    | 2.25E-10 |
| phe.Fasting_rs77523818 | S7  | SPTLC1    | rs12581352  | S2  | NA          | 7.63E-18 | 3.12E-10    | 8.49E-14 | 2.07E-13 | 8.42E-06    | 1.15E-09 |
| phe.Fasting_rs77798597 | S7  | KPNA3     | rs57503635  | S3  | NA          | 1.29E-15 | 5.25E-08    | 3.74E-12 | 4.13E-15 | 1.68E-07    | 3.85E-11 |
| phe.Fasting_rs77845645 | S21 | NA        | rs114334325 | S7  | AP3M2       | 2.01E-12 | 8.21E-05    | 3.80E-09 | 8.48E-14 | 3.45E-06    | 5.67E-10 |
| phe.Fasting_rs77845645 | S21 | NA        | rs114394395 | S7  | AP3M2       | 2.12E-12 | 8.66E-05    | 3.98E-09 | 8.48E-14 | 3.45E-06    | 5.67E-10 |
| phe.Fasting_rs77845645 | S21 | NA        | rs114565620 | S8  | RCL1        | 8.97E-18 | 3.66E-10    | 9.19E-14 | 9.34E-16 | 3.80E-08    | 1.16E-11 |
| phe.Fasting_rs77845645 | S21 | NA        | rs116406581 | S2  | NA          | 7.82E-12 | 0.000319355 | 1.31E-08 | 4.52E-14 | 1.84E-06    | 3.14E-10 |
| phe.Fasting_rs77845645 | S21 | NA        | rs116696844 | S3  | AP3M2       | 2.71E-12 | 0.00011073  | 5.01E-09 | 8.48E-14 | 3.45E-06    | 5.67E-10 |

|                        |     |             |             |     |           |          |             |          |          |             |          |
|------------------------|-----|-------------|-------------|-----|-----------|----------|-------------|----------|----------|-------------|----------|
| phe.Fasting_rs77845645 | S21 | NA          | rs141926074 | S8  | ATE1      | 5.46E-18 | 2.23E-10    | 7.07E-14 | 2.36E-11 | 0.000959051 | 8.19E-08 |
| phe.Fasting_rs77845645 | S21 | NA          | rs7004597   | S8  | NA        | 2.01E-12 | 8.21E-05    | 3.80E-09 | 4.28E-14 | 1.74E-06    | 2.98E-10 |
| phe.Fasting_rs77845645 | S21 | NA          | rs73392640  | S8  | POLR3B    | 1.43E-16 | 5.85E-09    | 5.66E-13 | 3.33E-12 | 0.000135717 | 1.41E-08 |
| phe.Fasting_rs77845645 | S21 | NA          | rs73619637  | S8  | NA        | 2.17E-10 | 0.00886193  | 2.67E-07 | 6.28E-17 | 2.56E-09    | 4.32E-12 |
| phe.Fasting_rs77845645 | S21 | NA          | rs74914207  | S24 | NA        | 1.55E-17 | 6.34E-10    | 1.20E-13 | 4.08E-11 | 0.00165898  | 1.34E-07 |
| phe.Fasting_rs77845645 | S21 | NA          | rs75350765  | S5  | RCL1      | 8.97E-18 | 3.66E-10    | 9.19E-14 | 9.34E-16 | 3.80E-08    | 1.16E-11 |
| phe.Fasting_rs77845645 | S21 | NA          | rs78353402  | S8  | AP3M2     | 2.01E-12 | 8.21E-05    | 3.80E-09 | 8.48E-14 | 3.45E-06    | 5.67E-10 |
| phe.Fasting_rs78353402 | S8  | AP3M2       | rs73619637  | S8  | NA        | 3.31E-14 | 1.35E-06    | 8.02E-11 | 5.78E-11 | 0.0023523   | 1.85E-07 |
| phe.Fasting_rs78722272 | S5  | CNTLN       | rs139070959 | S8  | RPN2      | 1.05E-17 | 4.28E-10    | 9.93E-14 | 3.49E-12 | 0.000142251 | 1.47E-08 |
| phe.Fasting_rs78736524 | S5  | KPNA3       | rs57503635  | S3  | NA        | 1.29E-15 | 5.25E-08    | 3.74E-12 | 4.33E-15 | 1.76E-07    | 4.03E-11 |
| phe.Fasting_rs78990344 | S2  | LOC1005063  | rs73392640  | S8  | POLR3B    | 1.29E-10 | 0.00525587  | 1.64E-07 | 9.02E-11 | 0.00367219  | 2.78E-07 |
| phe.Fasting_rs79389383 | S8  | PHC3        | rs116011837 | S9  | BRD2      | 2.77E-13 | 1.13E-05    | 5.95E-10 | 2.10E-11 | 0.000853749 | 7.39E-08 |
| phe.Fasting_rs79389383 | S8  | PHC3        | rs116120727 | S9  | BRD2      | 2.77E-13 | 1.13E-05    | 5.95E-10 | 2.10E-11 | 0.000853749 | 7.39E-08 |
| phe.Fasting_rs79389383 | S8  | PHC3        | rs141926074 | S8  | ATE1      | 1.26E-19 | 5.15E-12    | 2.23E-14 | 1.36E-11 | 0.00055511  | 4.95E-08 |
| phe.Fasting_rs79517926 | S15 | "DIAPH1,LOC | rs115787552 | S5  | KPNA3     | 7.26E-16 | 2.96E-08    | 2.22E-12 | 3.07E-19 | 1.25E-11    | 3.60E-13 |
| phe.Fasting_rs79517926 | S15 | "DIAPH1,LOC | rs115888477 | S8  | NA        | 5.65E-15 | 2.31E-07    | 1.47E-11 | 1.06E-16 | 4.32E-09    | 5.87E-12 |
| phe.Fasting_rs79517926 | S15 | "DIAPH1,LOC | rs116011837 | S9  | BRD2      | 1.30E-11 | 0.00053113  | 2.02E-08 | 2.01E-15 | 8.17E-08    | 2.11E-11 |
| phe.Fasting_rs79517926 | S15 | "DIAPH1,LOC | rs116079984 | S8  | KPNA3     | 7.26E-16 | 2.96E-08    | 2.22E-12 | 3.52E-19 | 1.43E-11    | 3.88E-13 |
| phe.Fasting_rs79517926 | S15 | "DIAPH1,LOC | rs116120727 | S9  | BRD2      | 1.30E-11 | 0.00053113  | 2.02E-08 | 2.01E-15 | 8.17E-08    | 2.11E-11 |
| phe.Fasting_rs79517926 | S15 | "DIAPH1,LOC | rs146815317 | S5  | KPNA3     | 7.26E-16 | 2.96E-08    | 2.22E-12 | 3.07E-19 | 1.25E-11    | 3.60E-13 |
| phe.Fasting_rs79517926 | S15 | "DIAPH1,LOC | rs150117838 | S8  | KPNA3     | 7.26E-16 | 2.96E-08    | 2.22E-12 | 2.85E-19 | 1.16E-11    | 3.60E-13 |
| phe.Fasting_rs79517926 | S15 | "DIAPH1,LOC | rs16894241  | S4  | HIST1H2BK | 9.78E-12 | 0.000399226 | 1.56E-08 | 2.78E-19 | 1.13E-11    | 3.60E-13 |
| phe.Fasting_rs79517926 | S15 | "DIAPH1,LOC | rs57503635  | S3  | NA        | 1.45E-16 | 5.93E-09    | 5.72E-13 | 3.68E-12 | 0.000149984 | 1.53E-08 |
| phe.Fasting_rs79517926 | S15 | "DIAPH1,LOC | rs73392640  | S8  | POLR3B    | 6.27E-11 | 0.00255856  | 8.39E-08 | 1.23E-13 | 5.00E-06    | 7.33E-10 |
| phe.Fasting_rs79517926 | S15 | "DIAPH1,LOC | rs74914207  | S24 | NA        | 3.23E-11 | 0.00131905  | 4.55E-08 | 2.22E-15 | 9.02E-08    | 2.24E-11 |
| phe.Fasting_rs79517926 | S15 | "DIAPH1,LOC | rs76844308  | S8  | CNTLN     | 1.42E-17 | 5.81E-10    | 1.15E-13 | 4.70E-11 | 0.00191221  | 1.52E-07 |
| phe.Fasting_rs79517926 | S15 | "DIAPH1,LOC | rs77798597  | S7  | KPNA3     | 7.26E-16 | 2.96E-08    | 2.22E-12 | 2.85E-19 | 1.16E-11    | 3.60E-13 |
| phe.Fasting_rs79517926 | S15 | "DIAPH1,LOC | rs78736524  | S5  | KPNA3     | 7.26E-16 | 2.96E-08    | 2.22E-12 | 3.07E-19 | 1.25E-11    | 3.60E-13 |
| phe.Fasting_rs79517926 | S15 | "DIAPH1,LOC | rs79781495  | S8  | KPNA3     | 7.26E-16 | 2.96E-08    | 2.22E-12 | 2.85E-19 | 1.16E-11    | 3.60E-13 |
| phe.Fasting_rs79517926 | S15 | "DIAPH1,LOC | rs80332465  | S5  | KPNA3     | 7.70E-16 | 3.15E-08    | 2.35E-12 | 3.18E-19 | 1.29E-11    | 3.60E-13 |
| phe.Fasting_rs79517926 | S15 | "DIAPH1,LOC | rs80334773  | S5  | KPNA3     | 7.70E-16 | 3.15E-08    | 2.35E-12 | 3.18E-19 | 1.29E-11    | 3.60E-13 |
| phe.Fasting_rs79518241 | S6  | PHC3        | rs116011837 | S9  | BRD2      | 2.70E-13 | 1.10E-05    | 5.81E-10 | 2.07E-11 | 0.000841008 | 7.31E-08 |
| phe.Fasting_rs79518241 | S6  | PHC3        | rs116120727 | S9  | BRD2      | 2.70E-13 | 1.10E-05    | 5.81E-10 | 2.07E-11 | 0.000841008 | 7.31E-08 |
| phe.Fasting_rs79518241 | S6  | PHC3        | rs141926074 | S8  | ATE1      | 1.23E-19 | 5.04E-12    | 2.23E-14 | 1.34E-11 | 0.000545558 | 4.89E-08 |
| phe.Fasting_rs79781495 | S8  | KPNA3       | rs57503635  | S3  | NA        | 1.29E-15 | 5.25E-08    | 3.74E-12 | 4.13E-15 | 1.68E-07    | 3.85E-11 |
| phe.Fasting_rs80157533 | S8  | NEK1        | rs113357907 | S24 | ISL1      | 6.12E-18 | 2.50E-10    | 7.50E-14 | 4.03E-16 | 1.64E-08    | 1.16E-11 |
| phe.Fasting_rs80157533 | S8  | NEK1        | rs116011837 | S9  | BRD2      | 2.29E-17 | 9.34E-10    | 1.45E-13 | 8.57E-11 | 0.00348829  | 2.64E-07 |
| phe.Fasting_rs80157533 | S8  | NEK1        | rs116120727 | S9  | BRD2      | 2.29E-17 | 9.34E-10    | 1.45E-13 | 8.57E-11 | 0.00348829  | 2.64E-07 |
| phe.Fasting_rs80157533 | S8  | NEK1        | rs6881310   | S23 | ISL1      | 4.23E-17 | 1.73E-09    | 2.22E-13 | 8.72E-13 | 3.55E-05    | 4.15E-09 |
| phe.Fasting_rs80157533 | S8  | NEK1        | rs77444916  | S23 | LOC642366 | 1.50E-17 | 6.11E-10    | 1.18E-13 | 3.78E-16 | 1.54E-08    | 1.16E-11 |

|                        |     |           |             |     |           |          |             |          |          |             |          |
|------------------------|-----|-----------|-------------|-----|-----------|----------|-------------|----------|----------|-------------|----------|
| phe.Fasting_rs80157533 | S8  | NEK1      | rs80258830  | S24 | LOC642366 | 1.50E-17 | 6.11E-10    | 1.18E-13 | 3.78E-16 | 1.54E-08    | 1.16E-11 |
| phe.Fasting_rs80200953 | S8  | PPP2R5D   | rs114565620 | S8  | RCL1      | 4.47E-18 | 1.83E-10    | 6.40E-14 | 2.13E-16 | 8.68E-09    | 8.14E-12 |
| phe.Fasting_rs80200953 | S8  | PPP2R5D   | rs75350765  | S5  | RCL1      | 4.47E-18 | 1.83E-10    | 6.40E-14 | 2.13E-16 | 8.68E-09    | 8.14E-12 |
| phe.Fasting_rs80258830 | S24 | LOC642366 | rs111576333 | S5  | TMEM64    | 3.76E-17 | 1.53E-09    | 2.04E-13 | 6.78E-15 | 2.76E-07    | 6.06E-11 |
| phe.Fasting_rs80258830 | S24 | LOC642366 | rs112091318 | S5  | TMEM64    | 1.13E-17 | 4.62E-10    | 1.02E-13 | 8.04E-15 | 3.27E-07    | 7.10E-11 |
| phe.Fasting_rs80258830 | S24 | LOC642366 | rs114334325 | S7  | AP3M2     | 1.30E-11 | 0.000530003 | 2.02E-08 | 4.93E-15 | 2.01E-07    | 4.56E-11 |
| phe.Fasting_rs80258830 | S24 | LOC642366 | rs114394395 | S7  | AP3M2     | 1.35E-11 | 0.00055115  | 2.09E-08 | 4.93E-15 | 2.01E-07    | 4.56E-11 |
| phe.Fasting_rs80258830 | S24 | LOC642366 | rs114565620 | S8  | RCL1      | 2.52E-17 | 1.03E-09    | 1.56E-13 | 5.48E-15 | 2.23E-07    | 5.01E-11 |
| phe.Fasting_rs80258830 | S24 | LOC642366 | rs115305957 | S23 | NA        | 1.48E-17 | 6.03E-10    | 1.17E-13 | 3.16E-15 | 1.29E-07    | 3.03E-11 |
| phe.Fasting_rs80258830 | S24 | LOC642366 | rs115787552 | S5  | KPNA3     | 2.72E-16 | 1.11E-08    | 9.14E-13 | 3.09E-14 | 1.26E-06    | 2.29E-10 |
| phe.Fasting_rs80258830 | S24 | LOC642366 | rs115888477 | S8  | NA        | 1.85E-15 | 7.54E-08    | 5.27E-12 | 5.33E-15 | 2.17E-07    | 4.88E-11 |
| phe.Fasting_rs80258830 | S24 | LOC642366 | rs116011837 | S9  | BRD2      | 2.31E-17 | 9.43E-10    | 1.46E-13 | 2.99E-13 | 1.22E-05    | 1.64E-09 |
| phe.Fasting_rs80258830 | S24 | LOC642366 | rs116079984 | S8  | KPNA3     | 2.72E-16 | 1.11E-08    | 9.14E-13 | 3.49E-14 | 1.42E-06    | 2.53E-10 |
| phe.Fasting_rs80258830 | S24 | LOC642366 | rs116120727 | S9  | BRD2      | 2.31E-17 | 9.43E-10    | 1.46E-13 | 2.99E-13 | 1.22E-05    | 1.64E-09 |
| phe.Fasting_rs80258830 | S24 | LOC642366 | rs116406581 | S2  | NA        | 5.35E-11 | 0.00218631  | 7.23E-08 | 3.94E-15 | 1.60E-07    | 3.70E-11 |
| phe.Fasting_rs80258830 | S24 | LOC642366 | rs116696844 | S3  | AP3M2     | 1.83E-11 | 0.000748556 | 2.76E-08 | 4.93E-15 | 2.01E-07    | 4.56E-11 |
| phe.Fasting_rs80258830 | S24 | LOC642366 | rs11989304  | S4  | TMEM64    | 3.76E-17 | 1.53E-09    | 2.04E-13 | 6.48E-15 | 2.64E-07    | 5.85E-11 |
| phe.Fasting_rs80258830 | S24 | LOC642366 | rs141926074 | S8  | ATE1      | 5.64E-18 | 2.30E-10    | 7.14E-14 | 8.39E-14 | 3.41E-06    | 5.61E-10 |
| phe.Fasting_rs80258830 | S24 | LOC642366 | rs146815317 | S5  | KPNA3     | 2.72E-16 | 1.11E-08    | 9.14E-13 | 3.09E-14 | 1.26E-06    | 2.29E-10 |
| phe.Fasting_rs80258830 | S24 | LOC642366 | rs1470889   | S5  | ZC3H3     | 3.47E-18 | 1.42E-10    | 5.60E-14 | 2.19E-13 | 8.93E-06    | 1.21E-09 |
| phe.Fasting_rs80258830 | S24 | LOC642366 | rs1470890   | S5  | ZC3H3     | 3.47E-18 | 1.42E-10    | 5.60E-14 | 2.19E-13 | 8.93E-06    | 1.21E-09 |
| phe.Fasting_rs80258830 | S24 | LOC642366 | rs150117838 | S8  | KPNA3     | 2.72E-16 | 1.11E-08    | 9.14E-13 | 2.88E-14 | 1.17E-06    | 2.16E-10 |
| phe.Fasting_rs80258830 | S24 | LOC642366 | rs17494290  | S5  | CDH2      | 3.23E-19 | 1.32E-11    | 2.40E-14 | 2.27E-12 | 9.24E-05    | 9.79E-09 |
| phe.Fasting_rs80258830 | S24 | LOC642366 | rs2924507   | S5  | ZC3H3     | 3.47E-18 | 1.42E-10    | 5.60E-14 | 2.19E-13 | 8.93E-06    | 1.21E-09 |
| phe.Fasting_rs80258830 | S24 | LOC642366 | rs2924508   | S8  | ZC3H3     | 3.47E-18 | 1.42E-10    | 5.60E-14 | 3.11E-13 | 1.27E-05    | 1.70E-09 |
| phe.Fasting_rs80258830 | S24 | LOC642366 | rs2924511   | S7  | ZC3H3     | 3.47E-18 | 1.42E-10    | 5.60E-14 | 1.97E-13 | 8.01E-06    | 1.10E-09 |
| phe.Fasting_rs80258830 | S24 | LOC642366 | rs2924512   | S7  | ZC3H3     | 3.97E-18 | 1.62E-10    | 5.99E-14 | 2.29E-13 | 9.30E-06    | 1.26E-09 |
| phe.Fasting_rs80258830 | S24 | LOC642366 | rs2956376   | S8  | ZC3H3     | 3.47E-18 | 1.42E-10    | 5.60E-14 | 1.33E-13 | 5.43E-06    | 7.77E-10 |
| phe.Fasting_rs80258830 | S24 | LOC642366 | rs2980270   | S7  | ZC3H3     | 3.47E-18 | 1.42E-10    | 5.60E-14 | 1.33E-13 | 5.43E-06    | 7.77E-10 |
| phe.Fasting_rs80258830 | S24 | LOC642366 | rs2980272   | S7  | ZC3H3     | 3.97E-18 | 1.62E-10    | 5.99E-14 | 2.52E-13 | 1.03E-05    | 1.39E-09 |
| phe.Fasting_rs80258830 | S24 | LOC642366 | rs2980275   | S5  | ZC3H3     | 3.47E-18 | 1.42E-10    | 5.60E-14 | 2.19E-13 | 8.93E-06    | 1.21E-09 |
| phe.Fasting_rs80258830 | S24 | LOC642366 | rs366767    | S5  | ZC3H3     | 4.74E-18 | 1.93E-10    | 6.62E-14 | 1.49E-13 | 6.06E-06    | 8.45E-10 |
| phe.Fasting_rs80258830 | S24 | LOC642366 | rs57503635  | S3  | NA        | 8.73E-17 | 3.57E-09    | 3.79E-13 | 1.25E-14 | 5.07E-07    | 1.07E-10 |
| phe.Fasting_rs80258830 | S24 | LOC642366 | rs7004597   | S8  | NA        | 1.30E-11 | 0.000530003 | 2.02E-08 | 3.39E-15 | 1.38E-07    | 3.24E-11 |
| phe.Fasting_rs80258830 | S24 | LOC642366 | rs7256517   | S7  | CYTH2     | 1.01E-16 | 4.11E-09    | 4.28E-13 | 8.71E-15 | 3.55E-07    | 7.66E-11 |
| phe.Fasting_rs80258830 | S24 | LOC642366 | rs73283603  | S7  | ZWINT     | 9.84E-17 | 4.02E-09    | 4.21E-13 | 5.66E-15 | 2.30E-07    | 5.16E-11 |
| phe.Fasting_rs80258830 | S24 | LOC642366 | rs73392640  | S8  | POLR3B    | 1.50E-16 | 6.14E-09    | 5.83E-13 | 9.36E-12 | 0.000380943 | 3.49E-08 |
| phe.Fasting_rs80258830 | S24 | LOC642366 | rs74627895  | S8  | TMEM64    | 1.13E-17 | 4.62E-10    | 1.02E-13 | 3.94E-15 | 1.60E-07    | 3.70E-11 |
| phe.Fasting_rs80258830 | S24 | LOC642366 | rs74701059  | S24 | C17orf102 | 1.50E-17 | 6.14E-10    | 1.18E-13 | 3.22E-15 | 1.31E-07    | 3.09E-11 |
| phe.Fasting_rs80258830 | S24 | LOC642366 | rs74914207  | S24 | NA        | 3.46E-12 | 0.000141389 | 6.28E-09 | 1.58E-11 | 0.000644651 | 5.68E-08 |



|                        |     |           |            |     |            |          |             |          |          |            |          |
|------------------------|-----|-----------|------------|-----|------------|----------|-------------|----------|----------|------------|----------|
| phe.Fasting_rs80258830 | S24 | LOC642366 | rs75350765 | S5  | RCL1       | 2.52E-17 | 1.03E-09    | 1.56E-13 | 5.48E-15 | 2.23E-07   | 5.01E-11 |
| phe.Fasting_rs80258830 | S24 | LOC642366 | rs75374128 | S5  | CNTLN      | 1.14E-17 | 4.66E-10    | 1.02E-13 | 8.56E-11 | 0.00348551 | 2.64E-07 |
| phe.Fasting_rs80258830 | S24 | LOC642366 | rs75758702 | S24 | NA         | 5.36E-18 | 2.19E-10    | 7.01E-14 | 1.92E-16 | 7.80E-09   | 7.61E-12 |
| phe.Fasting_rs80258830 | S24 | LOC642366 | rs75864203 | S8  | CNTLN      | 1.14E-17 | 4.66E-10    | 1.02E-13 | 8.56E-11 | 0.00348551 | 2.64E-07 |
| phe.Fasting_rs80258830 | S24 | LOC642366 | rs75949566 | S5  | TMEM64     | 3.79E-17 | 1.55E-09    | 2.05E-13 | 9.41E-15 | 3.83E-07   | 8.18E-11 |
| phe.Fasting_rs80258830 | S24 | LOC642366 | rs7763107  | S8  | FARS2      | 6.68E-17 | 2.73E-09    | 3.05E-13 | 1.29E-15 | 5.24E-08   | 1.46E-11 |
| phe.Fasting_rs80258830 | S24 | LOC642366 | rs77798597 | S7  | KPNA3      | 2.72E-16 | 1.11E-08    | 9.14E-13 | 2.88E-14 | 1.17E-06   | 2.16E-10 |
| phe.Fasting_rs80258830 | S24 | LOC642366 | rs77845645 | S21 | NA         | 1.59E-17 | 6.50E-10    | 1.22E-13 | 1.19E-14 | 4.85E-07   | 1.02E-10 |
| phe.Fasting_rs80258830 | S24 | LOC642366 | rs78353402 | S8  | AP3M2      | 1.30E-11 | 0.000530003 | 2.02E-08 | 4.93E-15 | 2.01E-07   | 4.56E-11 |
| phe.Fasting_rs80258830 | S24 | LOC642366 | rs78516788 | S8  | SLC38A1    | 1.33E-17 | 5.43E-10    | 1.10E-13 | 1.01E-14 | 4.10E-07   | 8.74E-11 |
| phe.Fasting_rs80258830 | S24 | LOC642366 | rs78697063 | S5  | MSI2       | 5.49E-20 | 2.24E-12    | 2.23E-14 | 3.16E-15 | 1.28E-07   | 3.03E-11 |
| phe.Fasting_rs80258830 | S24 | LOC642366 | rs78722272 | S5  | CNTLN      | 1.14E-17 | 4.66E-10    | 1.02E-13 | 8.46E-11 | 0.00344297 | 2.62E-07 |
| phe.Fasting_rs80258830 | S24 | LOC642366 | rs78736524 | S5  | KPNA3      | 2.72E-16 | 1.11E-08    | 9.14E-13 | 3.09E-14 | 1.26E-06   | 2.29E-10 |
| phe.Fasting_rs80258830 | S24 | LOC642366 | rs78990344 | S2  | LOC1005063 | 3.76E-17 | 1.53E-09    | 2.04E-13 | 6.48E-15 | 2.64E-07   | 5.85E-11 |
| phe.Fasting_rs80258830 | S24 | LOC642366 | rs79703349 | S24 | C17orf102  | 1.50E-17 | 6.14E-10    | 1.18E-13 | 3.66E-15 | 1.49E-07   | 3.48E-11 |
| phe.Fasting_rs80258830 | S24 | LOC642366 | rs79781495 | S8  | KPNA3      | 2.72E-16 | 1.11E-08    | 9.14E-13 | 2.88E-14 | 1.17E-06   | 2.16E-10 |
| phe.Fasting_rs80258830 | S24 | LOC642366 | rs80332465 | S5  | KPNA3      | 2.95E-16 | 1.21E-08    | 9.83E-13 | 3.02E-14 | 1.23E-06   | 2.25E-10 |
| phe.Fasting_rs80258830 | S24 | LOC642366 | rs80334773 | S5  | KPNA3      | 2.95E-16 | 1.21E-08    | 9.83E-13 | 3.02E-14 | 1.23E-06   | 2.25E-10 |
| phe.Fasting_rs80332465 | S5  | KPNA3     | rs57503635 | S3  | NA         | 1.37E-15 | 5.60E-08    | 3.96E-12 | 4.42E-15 | 1.80E-07   | 4.10E-11 |
| phe.Fasting_rs80334773 | S5  | KPNA3     | rs57503635 | S3  | NA         | 1.37E-15 | 5.60E-08    | 3.96E-12 | 4.42E-15 | 1.80E-07   | 4.10E-11 |

**Table 4: Replicated Results after FDR Correction**

| Phenotype    | SNP_1      | State_1 | Gene_1 | SNP_2       | State_2 | Gene_2      | Discovery_pval | Discovery_bonf_pval | Discovery_FDR_pval | Replication_pval | Replication_bonf_pval | Replication_FDR_pval |
|--------------|------------|---------|--------|-------------|---------|-------------|----------------|---------------------|--------------------|------------------|-----------------------|----------------------|
| phe.Fasting_ | rs10019772 | S7      | LETM1  | rs113357907 | S24     | ISL1        | 9.78E-09       | 3.99E-01            | 9.14E-06           | 2.80E-10         | 1.14E-02              | 7.66E-07             |
| phe.Fasting_ | rs10019772 | S7      | LETM1  | rs116011837 | S9      | BRD2        | 9.87E-09       | 4.03E-01            | 9.22E-06           | 3.94E-06         | 1.00E+00              | 3.71E-03             |
| phe.Fasting_ | rs10019772 | S7      | LETM1  | rs116120727 | S9      | BRD2        | 9.87E-09       | 4.03E-01            | 9.22E-06           | 3.94E-06         | 1.00E+00              | 3.71E-03             |
| phe.Fasting_ | rs10019772 | S7      | LETM1  | rs77444916  | S23     | LOC642366   | 3.10E-08       | 1.00E+00            | 2.65E-05           | 2.67E-10         | 1.09E-02              | 7.33E-07             |
| phe.Fasting_ | rs10019772 | S7      | LETM1  | rs80258830  | S24     | LOC642366   | 3.10E-08       | 1.00E+00            | 2.65E-05           | 2.67E-10         | 1.09E-02              | 7.33E-07             |
| phe.Fasting_ | rs10166084 | S23     | NA     | rs112027720 | S7      | DIAPH1      | 1.30E-07       | 1.00E+00            | 9.62E-05           | 3.13E-06         | 1.00E+00              | 3.04E-03             |
| phe.Fasting_ | rs10166084 | S23     | NA     | rs113219478 | S7      | DIAPH1      | 1.30E-07       | 1.00E+00            | 9.62E-05           | 3.13E-06         | 1.00E+00              | 3.04E-03             |
| phe.Fasting_ | rs10166084 | S23     | NA     | rs138487229 | S11     | DIAPH1      | 1.30E-07       | 1                   | 9.62E-05           | 3.13E-06         | 1.00E+00              | 3.04E-03             |
| phe.Fasting_ | rs10166084 | S23     | NA     | rs138738950 | S8      | "PCDHGB2,Pi | 1.30E-07       | 1                   | 9.62E-05           | 3.15E-06         | 1.00E+00              | 3.05E-03             |
| phe.Fasting_ | rs10166084 | S23     | NA     | rs139297927 | S8      | DIAPH1      | 1.30E-07       | 1                   | 9.62E-05           | 3.13E-06         | 1.00E+00              | 3.04E-03             |
| phe.Fasting_ | rs10166084 | S23     | NA     | rs139337303 | S8      | DIAPH1      | 1.30E-07       | 1.00E+00            | 9.62E-05           | 3.13E-06         | 1.00E+00              | 3.04E-03             |
| phe.Fasting_ | rs10166084 | S23     | NA     | rs139621309 | S18     | "LOC1005056 | 1.30E-07       | 1                   | 9.62E-05           | 3.13E-06         | 1.00E+00              | 3.04E-03             |
| phe.Fasting_ | rs10166084 | S23     | NA     | rs140070363 | S8      | DIAPH1      | 1.30E-07       | 1.00E+00            | 9.62E-05           | 3.13E-06         | 1.00E+00              | 3.04E-03             |
| phe.Fasting_ | rs10166084 | S23     | NA     | rs140644750 | S13     | DIAPH1      | 1.30E-07       | 1.00E+00            | 9.62E-05           | 3.13E-06         | 1.00E+00              | 3.04E-03             |
| phe.Fasting_ | rs10166084 | S23     | NA     | rs141022544 | S8      | DIAPH1      | 1.30E-07       | 1.00E+00            | 9.62E-05           | 3.13E-06         | 1.00E+00              | 3.04E-03             |
| phe.Fasting_ | rs10166084 | S23     | NA     | rs141525984 | S5      | DIAPH1      | 1.30E-07       | 1.00E+00            | 9.62E-05           | 3.13E-06         | 1.00E+00              | 3.04E-03             |
| phe.Fasting_ | rs10166084 | S23     | NA     | rs142480565 | S8      | DIAPH1      | 1.30E-07       | 1.00E+00            | 9.62E-05           | 3.13E-06         | 1.00E+00              | 3.04E-03             |
| phe.Fasting_ | rs10166084 | S23     | NA     | rs142718558 | S7      | "DIAPH1,LOC | 1.30E-07       | 1.00E+00            | 9.62E-05           | 3.13E-06         | 1.00E+00              | 3.04E-03             |
| phe.Fasting_ | rs10166084 | S23     | NA     | rs144613910 | S8      | DIAPH1      | 1.30E-07       | 1.00E+00            | 9.62E-05           | 3.13E-06         | 1.00E+00              | 3.04E-03             |
| phe.Fasting_ | rs10166084 | S23     | NA     | rs146220673 | S7      | DIAPH1      | 1.30E-07       | 1.00E+00            | 9.62E-05           | 3.13E-06         | 1.00E+00              | 3.04E-03             |
| phe.Fasting_ | rs10166084 | S23     | NA     | rs146878162 | S7      | DIAPH1      | 1.30E-07       | 1.00E+00            | 9.62E-05           | 3.13E-06         | 1.00E+00              | 3.04E-03             |
| phe.Fasting_ | rs10166084 | S23     | NA     | rs147314451 | S8      | DIAPH1      | 1.30E-07       | 1                   | 9.62E-05           | 3.13E-06         | 1.00E+00              | 3.04E-03             |
| phe.Fasting_ | rs10166084 | S23     | NA     | rs147646948 | S7      | "LOC1005056 | 1.30E-07       | 1                   | 9.62E-05           | 3.13E-06         | 1.00E+00              | 3.04E-03             |
| phe.Fasting_ | rs10166084 | S23     | NA     | rs148116628 | S7      | DIAPH1      | 1.30E-07       | 1                   | 9.62E-05           | 3.13E-06         | 1.00E+00              | 3.04E-03             |
| phe.Fasting_ | rs10166084 | S23     | NA     | rs148423011 | S7      | DIAPH1      | 1.30E-07       | 1                   | 9.62E-05           | 3.13E-06         | 1.00E+00              | 3.04E-03             |
| phe.Fasting_ | rs10166084 | S23     | NA     | rs149075406 | S8      | DIAPH1      | 1.30E-07       | 1.00E+00            | 9.62E-05           | 3.13E-06         | 1.00E+00              | 3.04E-03             |
| phe.Fasting_ | rs10166084 | S23     | NA     | rs149334783 | S8      | DIAPH1      | 1.30E-07       | 1.00E+00            | 9.62E-05           | 3.13E-06         | 1.00E+00              | 3.04E-03             |
| phe.Fasting_ | rs10166084 | S23     | NA     | rs149716949 | S5      | DIAPH1      | 6.95E-09       | 2.84E-01            | 6.67E-06           | 1.73E-06         | 1.00E+00              | 1.82E-03             |
| phe.Fasting_ | rs10166084 | S23     | NA     | rs150452206 | S13     | "DIAPH1,LOC | 1.30E-07       | 1.00E+00            | 9.62E-05           | 3.13E-06         | 1.00E+00              | 3.04E-03             |
| phe.Fasting_ | rs10166084 | S23     | NA     | rs150675915 | S7      | DIAPH1      | 1.30E-07       | 1                   | 9.62E-05           | 3.13E-06         | 1.00E+00              | 3.04E-03             |
| phe.Fasting_ | rs10166084 | S23     | NA     | rs150765570 | S7      | DIAPH1      | 1.30E-07       | 1                   | 9.62E-05           | 3.13E-06         | 1.00E+00              | 3.04E-03             |
| phe.Fasting_ | rs10166084 | S23     | NA     | rs151204700 | S8      | DIAPH1      | 1.30E-07       | 1                   | 9.62E-05           | 3.13E-06         | 1.00E+00              | 3.04E-03             |
| phe.Fasting_ | rs10166084 | S23     | NA     | rs180772028 | S8      | "DIAPH1,LOC | 1.30E-07       | 1                   | 9.62E-05           | 3.13E-06         | 1.00E+00              | 3.04E-03             |
| phe.Fasting_ | rs10166084 | S23     | NA     | rs181224861 | S7      | DIAPH1      | 1.30E-07       | 1                   | 9.62E-05           | 3.13E-06         | 1.00E+00              | 3.04E-03             |
| phe.Fasting_ | rs10166084 | S23     | NA     | rs182714699 | S8      | DIAPH1      | 1.30E-07       | 1                   | 9.62E-05           | 3.13E-06         | 1.00E+00              | 3.04E-03             |
| phe.Fasting_ | rs10166084 | S23     | NA     | rs183597049 | S7      | DIAPH1      | 1.30E-07       | 1                   | 9.62E-05           | 3.13E-06         | 1.00E+00              | 3.04E-03             |

|                        |     |       |                 |               |          |          |             |          |          |          |
|------------------------|-----|-------|-----------------|---------------|----------|----------|-------------|----------|----------|----------|
| phe.Fasting_rs10166084 | S23 | NA    | rs183980988 S2  | NA            | 1.30E-07 | 1        | 9.62E-05    | 3.13E-06 | 1.00E+00 | 3.04E-03 |
| phe.Fasting_rs10166084 | S23 | NA    | rs184233232 S7  | DIAPH1        | 1.30E-07 | 1        | 9.62E-05    | 3.13E-06 | 1.00E+00 | 3.04E-03 |
| phe.Fasting_rs10166084 | S23 | NA    | rs184509477 S13 | "PCDHGB4,PI   | 1.30E-07 | 1        | 9.62E-05    | 3.13E-06 | 1.00E+00 | 3.04E-03 |
| phe.Fasting_rs10166084 | S23 | NA    | rs185069296 S15 | "LOC100505056 | 1.30E-07 | 1        | 9.62E-05    | 3.13E-06 | 1.00E+00 | 3.04E-03 |
| phe.Fasting_rs10166084 | S23 | NA    | rs185759881 S7  | DIAPH1        | 1.30E-07 | 1        | 9.62E-05    | 3.13E-06 | 1.00E+00 | 3.04E-03 |
| phe.Fasting_rs10166084 | S23 | NA    | rs187000011 S11 | DIAPH1        | 1.30E-07 | 1        | 9.62E-05    | 3.13E-06 | 1.00E+00 | 3.04E-03 |
| phe.Fasting_rs10166084 | S23 | NA    | rs188981295 S5  | "RPS27AP10,   | 1.30E-07 | 1        | 9.62E-05    | 3.13E-06 | 1.00E+00 | 3.04E-03 |
| phe.Fasting_rs10166084 | S23 | NA    | rs191544043 S8  | DIAPH1        | 1.30E-07 | 1        | 9.62E-05    | 3.13E-06 | 1.00E+00 | 3.04E-03 |
| phe.Fasting_rs10166084 | S23 | NA    | rs191766712 S7  | DIAPH1        | 1.30E-07 | 1        | 9.62E-05    | 3.13E-06 | 1.00E+00 | 3.04E-03 |
| phe.Fasting_rs10166084 | S23 | NA    | rs192690040 S7  | DIAPH1        | 1.30E-07 | 1        | 9.62E-05    | 3.13E-06 | 1.00E+00 | 3.04E-03 |
| phe.Fasting_rs10166084 | S23 | NA    | rs192765219 S7  | DIAPH1        | 1.30E-07 | 1        | 9.62E-05    | 3.13E-06 | 1.00E+00 | 3.04E-03 |
| phe.Fasting_rs10166084 | S23 | NA    | rs192770525 S7  | DIAPH1        | 1.30E-07 | 1        | 9.62E-05    | 3.13E-06 | 1.00E+00 | 3.04E-03 |
| phe.Fasting_rs10194708 | S5  | LIMS1 | rs112027720 S7  | DIAPH1        | 7.58E-08 | 1        | 5.94E-05    | 4.80E-06 | 1.00E+00 | 4.42E-03 |
| phe.Fasting_rs10194708 | S5  | LIMS1 | rs112940854 S5  | MYO1B         | 1.63E-05 | 1        | 6.96E-03    | 7.31E-07 | 1.00E+00 | 8.48E-04 |
| phe.Fasting_rs10194708 | S5  | LIMS1 | rs113219478 S7  | DIAPH1        | 7.58E-08 | 1        | 5.94E-05    | 4.80E-06 | 1.00E+00 | 4.42E-03 |
| phe.Fasting_rs10194708 | S5  | LIMS1 | rs115888477 S8  | NA            | 5.65E-07 | 1        | 3.67E-04    | 1.54E-07 | 1.00E+00 | 2.09E-04 |
| phe.Fasting_rs10194708 | S5  | LIMS1 | rs138090701 S5  | HDAC3         | 1.05E-07 | 1.00E+00 | 7.97E-05    | 6.46E-06 | 1.00E+00 | 5.68E-03 |
| phe.Fasting_rs10194708 | S5  | LIMS1 | rs138136869 S7  | DIAPH1        | 1.77E-08 | 0.72259  | 1.57E-05    | 2.12E-06 | 1.00E+00 | 2.17E-03 |
| phe.Fasting_rs10194708 | S5  | LIMS1 | rs138457103 S10 | DIAPH1        | 1.62E-06 | 1        | 0.000930264 | 7.69E-06 | 1.00E+00 | 6.56E-03 |
| phe.Fasting_rs10194708 | S5  | LIMS1 | rs138487229 S11 | DIAPH1        | 7.58E-08 | 1        | 5.94E-05    | 4.80E-06 | 1.00E+00 | 4.42E-03 |
| phe.Fasting_rs10194708 | S5  | LIMS1 | rs138738950 S8  | "PCDHGB2,PI   | 7.58E-08 | 1        | 5.94E-05    | 4.79E-06 | 1.00E+00 | 4.42E-03 |
| phe.Fasting_rs10194708 | S5  | LIMS1 | rs139297927 S8  | DIAPH1        | 7.58E-08 | 1        | 5.94E-05    | 4.80E-06 | 1.00E+00 | 4.42E-03 |
| phe.Fasting_rs10194708 | S5  | LIMS1 | rs139337303 S8  | DIAPH1        | 7.58E-08 | 1        | 5.94E-05    | 4.80E-06 | 1.00E+00 | 4.42E-03 |
| phe.Fasting_rs10194708 | S5  | LIMS1 | rs139403963 S8  | DIAPH1        | 1.77E-08 | 0.72259  | 1.57E-05    | 2.12E-06 | 1.00E+00 | 2.17E-03 |
| phe.Fasting_rs10194708 | S5  | LIMS1 | rs139621309 S18 | "LOC100505056 | 7.58E-08 | 1.00E+00 | 5.94E-05    | 4.80E-06 | 1.00E+00 | 4.42E-03 |
| phe.Fasting_rs10194708 | S5  | LIMS1 | rs139828110 S8  | DIAPH1        | 1.77E-08 | 0.72259  | 1.57E-05    | 2.12E-06 | 1.00E+00 | 2.17E-03 |
| phe.Fasting_rs10194708 | S5  | LIMS1 | rs140070363 S8  | DIAPH1        | 7.58E-08 | 1        | 5.94E-05    | 4.80E-06 | 1.00E+00 | 4.42E-03 |
| phe.Fasting_rs10194708 | S5  | LIMS1 | rs140644750 S13 | DIAPH1        | 7.58E-08 | 1        | 5.94E-05    | 4.80E-06 | 1.00E+00 | 4.42E-03 |
| phe.Fasting_rs10194708 | S5  | LIMS1 | rs141022544 S8  | DIAPH1        | 7.58E-08 | 1        | 5.94E-05    | 4.80E-06 | 1.00E+00 | 4.42E-03 |
| phe.Fasting_rs10194708 | S5  | LIMS1 | rs141525984 S5  | DIAPH1        | 7.58E-08 | 1        | 5.94E-05    | 4.80E-06 | 1.00E+00 | 4.42E-03 |
| phe.Fasting_rs10194708 | S5  | LIMS1 | rs142480565 S8  | DIAPH1        | 7.58E-08 | 1        | 5.94E-05    | 4.80E-06 | 1.00E+00 | 4.42E-03 |
| phe.Fasting_rs10194708 | S5  | LIMS1 | rs142718558 S7  | "DIAPH1,LOC   | 7.58E-08 | 1        | 5.94E-05    | 4.80E-06 | 1.00E+00 | 4.42E-03 |
| phe.Fasting_rs10194708 | S5  | LIMS1 | rs142789100 S8  | DIAPH1        | 1.77E-08 | 0.72259  | 1.57E-05    | 2.12E-06 | 1.00E+00 | 2.17E-03 |
| phe.Fasting_rs10194708 | S5  | LIMS1 | rs142812798 S7  | DIAPH1        | 1.77E-08 | 0.72259  | 1.57E-05    | 2.12E-06 | 1.00E+00 | 2.17E-03 |
| phe.Fasting_rs10194708 | S5  | LIMS1 | rs143377827 S13 | "DIAPH1,LOC   | 1.03E-08 | 4.22E-01 | 9.60E-06    | 1.57E-06 | 1.00E+00 | 1.68E-03 |
| phe.Fasting_rs10194708 | S5  | LIMS1 | rs143691978 S11 | DIAPH1        | 1.77E-08 | 7.23E-01 | 1.57E-05    | 2.18E-06 | 1.00E+00 | 2.23E-03 |
| phe.Fasting_rs10194708 | S5  | LIMS1 | rs144081334 S11 | DIAPH1        | 1.77E-08 | 0.72259  | 1.57E-05    | 2.18E-06 | 1.00E+00 | 2.23E-03 |
| phe.Fasting_rs10194708 | S5  | LIMS1 | rs144613910 S8  | DIAPH1        | 7.58E-08 | 1        | 5.94E-05    | 4.80E-06 | 1.00E+00 | 4.42E-03 |
| phe.Fasting_rs10194708 | S5  | LIMS1 | rs145027704 S11 | DIAPH1        | 1.77E-08 | 0.72259  | 1.57E-05    | 2.18E-06 | 1.00E+00 | 2.23E-03 |
| phe.Fasting_rs10194708 | S5  | LIMS1 | rs146220673 S7  | DIAPH1        | 7.58E-08 | 1        | 5.94E-05    | 4.80E-06 | 1.00E+00 | 4.42E-03 |

|                        |    |       |                |             |          |          |          |          |          |          |
|------------------------|----|-------|----------------|-------------|----------|----------|----------|----------|----------|----------|
| phe.Fasting_rs10194708 | S5 | LIMS1 | rs146622060S13 | DIAPH1      | 1.77E-08 | 0.72259  | 1.57E-05 | 2.18E-06 | 1.00E+00 | 2.23E-03 |
| phe.Fasting_rs10194708 | S5 | LIMS1 | rs146878162S7  | DIAPH1      | 7.58E-08 | 1        | 5.94E-05 | 4.80E-06 | 1.00E+00 | 4.42E-03 |
| phe.Fasting_rs10194708 | S5 | LIMS1 | rs147314451S8  | DIAPH1      | 7.58E-08 | 1.00E+00 | 5.94E-05 | 4.80E-06 | 1.00E+00 | 4.42E-03 |
| phe.Fasting_rs10194708 | S5 | LIMS1 | rs147417996S7  | DIAPH1      | 1.77E-08 | 7.23E-01 | 1.57E-05 | 2.18E-06 | 1.00E+00 | 2.23E-03 |
| phe.Fasting_rs10194708 | S5 | LIMS1 | rs147646948S7  | "LOC1005056 | 7.58E-08 | 1        | 5.94E-05 | 4.80E-06 | 1.00E+00 | 4.42E-03 |
| phe.Fasting_rs10194708 | S5 | LIMS1 | rs147677041S8  | DIAPH1      | 1.77E-08 | 0.72259  | 1.57E-05 | 2.12E-06 | 1.00E+00 | 2.17E-03 |
| phe.Fasting_rs10194708 | S5 | LIMS1 | rs148116628S7  | DIAPH1      | 7.58E-08 | 1        | 5.94E-05 | 4.80E-06 | 1.00E+00 | 4.42E-03 |
| phe.Fasting_rs10194708 | S5 | LIMS1 | rs148423011S7  | DIAPH1      | 7.58E-08 | 1        | 5.94E-05 | 4.80E-06 | 1.00E+00 | 4.42E-03 |
| phe.Fasting_rs10194708 | S5 | LIMS1 | rs149019627S8  | DIAPH1      | 1.77E-08 | 0.72259  | 1.57E-05 | 2.12E-06 | 1.00E+00 | 2.17E-03 |
| phe.Fasting_rs10194708 | S5 | LIMS1 | rs149075406S8  | DIAPH1      | 7.58E-08 | 1        | 5.94E-05 | 4.80E-06 | 1.00E+00 | 4.42E-03 |
| phe.Fasting_rs10194708 | S5 | LIMS1 | rs149334783S8  | DIAPH1      | 7.58E-08 | 1.00E+00 | 5.94E-05 | 4.80E-06 | 1.00E+00 | 4.42E-03 |
| phe.Fasting_rs10194708 | S5 | LIMS1 | rs149716949S5  | DIAPH1      | 1.69E-07 | 1.00E+00 | 1.22E-04 | 3.26E-06 | 1.00E+00 | 3.15E-03 |
| phe.Fasting_rs10194708 | S5 | LIMS1 | rs149791570S5  | DIAPH1      | 1.77E-08 | 7.23E-01 | 1.57E-05 | 2.12E-06 | 1.00E+00 | 2.17E-03 |
| phe.Fasting_rs10194708 | S5 | LIMS1 | rs150452206S13 | "DIAPH1,LOC | 7.58E-08 | 1.00E+00 | 5.94E-05 | 4.80E-06 | 1.00E+00 | 4.42E-03 |
| phe.Fasting_rs10194708 | S5 | LIMS1 | rs150675915S7  | DIAPH1      | 7.58E-08 | 1.00E+00 | 5.94E-05 | 4.80E-06 | 1.00E+00 | 4.42E-03 |
| phe.Fasting_rs10194708 | S5 | LIMS1 | rs150765570S7  | DIAPH1      | 7.58E-08 | 1.00E+00 | 5.94E-05 | 4.80E-06 | 1.00E+00 | 4.42E-03 |
| phe.Fasting_rs10194708 | S5 | LIMS1 | rs150992994S11 | "PCDHGAS,PI | 7.46E-08 | 1.00E+00 | 5.86E-05 | 1.96E-06 | 1.00E+00 | 2.04E-03 |
| phe.Fasting_rs10194708 | S5 | LIMS1 | rs151204700S8  | DIAPH1      | 7.58E-08 | 1.00E+00 | 5.94E-05 | 4.80E-06 | 1.00E+00 | 4.42E-03 |
| phe.Fasting_rs10194708 | S5 | LIMS1 | rs151330468S8  | DIAPH1      | 1.77E-08 | 7.23E-01 | 1.57E-05 | 2.18E-06 | 1.00E+00 | 2.23E-03 |
| phe.Fasting_rs10194708 | S5 | LIMS1 | rs16833551S5   | MYO1B       | 1.74E-05 | 1.00E+00 | 7.37E-03 | 1.21E-07 | 1.00E+00 | 1.68E-04 |
| phe.Fasting_rs10194708 | S5 | LIMS1 | rs180772028S8  | "DIAPH1,LOC | 7.58E-08 | 1.00E+00 | 5.94E-05 | 4.80E-06 | 1.00E+00 | 4.42E-03 |
| phe.Fasting_rs10194708 | S5 | LIMS1 | rs181224861S7  | DIAPH1      | 7.58E-08 | 1.00E+00 | 5.94E-05 | 4.80E-06 | 1.00E+00 | 4.42E-03 |
| phe.Fasting_rs10194708 | S5 | LIMS1 | rs182714699S8  | DIAPH1      | 7.58E-08 | 1.00E+00 | 5.94E-05 | 4.80E-06 | 1.00E+00 | 4.42E-03 |
| phe.Fasting_rs10194708 | S5 | LIMS1 | rs182965141S8  | DIAPH1      | 2.05E-08 | 8.37E-01 | 1.81E-05 | 1.36E-06 | 1.00E+00 | 1.49E-03 |
| phe.Fasting_rs10194708 | S5 | LIMS1 | rs183597049S7  | DIAPH1      | 7.58E-08 | 1.00E+00 | 5.94E-05 | 4.80E-06 | 1.00E+00 | 4.42E-03 |
| phe.Fasting_rs10194708 | S5 | LIMS1 | rs183980988S2  | NA          | 7.58E-08 | 1.00E+00 | 5.94E-05 | 4.80E-06 | 1.00E+00 | 4.42E-03 |
| phe.Fasting_rs10194708 | S5 | LIMS1 | rs184233232S7  | DIAPH1      | 7.58E-08 | 1.00E+00 | 5.94E-05 | 4.80E-06 | 1.00E+00 | 4.42E-03 |
| phe.Fasting_rs10194708 | S5 | LIMS1 | rs184509477S13 | "PCDHGB4,PI | 7.58E-08 | 1.00E+00 | 5.94E-05 | 4.80E-06 | 1.00E+00 | 4.42E-03 |
| phe.Fasting_rs10194708 | S5 | LIMS1 | rs185069296S15 | "LOC1005056 | 7.58E-08 | 1.00E+00 | 5.94E-05 | 4.80E-06 | 1.00E+00 | 4.42E-03 |
| phe.Fasting_rs10194708 | S5 | LIMS1 | rs185502834S8  | DIAPH1      | 1.77E-08 | 7.23E-01 | 1.57E-05 | 2.12E-06 | 1.00E+00 | 2.17E-03 |
| phe.Fasting_rs10194708 | S5 | LIMS1 | rs185759881S7  | DIAPH1      | 7.58E-08 | 1.00E+00 | 5.94E-05 | 4.80E-06 | 1.00E+00 | 4.42E-03 |
| phe.Fasting_rs10194708 | S5 | LIMS1 | rs187000011S11 | DIAPH1      | 7.58E-08 | 1.00E+00 | 5.94E-05 | 4.80E-06 | 1.00E+00 | 4.42E-03 |
| phe.Fasting_rs10194708 | S5 | LIMS1 | rs188981295S5  | "RPS27AP10, | 7.58E-08 | 1.00E+00 | 5.94E-05 | 4.80E-06 | 1.00E+00 | 4.42E-03 |
| phe.Fasting_rs10194708 | S5 | LIMS1 | rs190559574S7  | DIAPH1      | 1.77E-08 | 7.23E-01 | 1.57E-05 | 2.12E-06 | 1.00E+00 | 2.17E-03 |
| phe.Fasting_rs10194708 | S5 | LIMS1 | rs191544043S8  | DIAPH1      | 7.58E-08 | 1.00E+00 | 5.94E-05 | 4.80E-06 | 1.00E+00 | 4.42E-03 |
| phe.Fasting_rs10194708 | S5 | LIMS1 | rs191766712S7  | DIAPH1      | 7.58E-08 | 1.00E+00 | 5.94E-05 | 4.80E-06 | 1.00E+00 | 4.42E-03 |
| phe.Fasting_rs10194708 | S5 | LIMS1 | rs192690040S7  | DIAPH1      | 7.58E-08 | 1.00E+00 | 5.94E-05 | 4.80E-06 | 1.00E+00 | 4.42E-03 |
| phe.Fasting_rs10194708 | S5 | LIMS1 | rs192765219S7  | DIAPH1      | 7.58E-08 | 1.00E+00 | 5.94E-05 | 4.80E-06 | 1.00E+00 | 4.42E-03 |
| phe.Fasting_rs10194708 | S5 | LIMS1 | rs192770525S7  | DIAPH1      | 7.58E-08 | 1.00E+00 | 5.94E-05 | 4.80E-06 | 1.00E+00 | 4.42E-03 |
| phe.Fasting_rs10194708 | S5 | LIMS1 | rs35990401S7   | DIAPH1      | 1.20E-07 | 1.00E+00 | 8.98E-05 | 1.12E-06 | 1.00E+00 | 1.25E-03 |

|                           |        |                |               |          |          |             |          |          |          |
|---------------------------|--------|----------------|---------------|----------|----------|-------------|----------|----------|----------|
| phe.Fasting_rs10194708 S5 | LIMS1  | rs55900860 S7  | DIAPH1        | 1.77E-08 | 7.23E-01 | 1.57E-05    | 2.12E-06 | 1.00E+00 | 2.17E-03 |
| phe.Fasting_rs10194708 S5 | LIMS1  | rs61613048 S8  | MYO1B         | 1.86E-05 | 1.00E+00 | 7.83E-03    | 3.77E-07 | 1.00E+00 | 4.66E-04 |
| phe.Fasting_rs10194708 S5 | LIMS1  | rs73058677 S5  | MYO1B         | 1.63E-05 | 1.00E+00 | 6.96E-03    | 1.93E-07 | 1.00E+00 | 2.56E-04 |
| phe.Fasting_rs10212542 S7 | FANCD2 | rs112027720S7  | DIAPH1        | 4.36E-07 | 1.00E+00 | 2.89E-04    | 1.62E-06 | 1.00E+00 | 1.72E-03 |
| phe.Fasting_rs10212542 S7 | FANCD2 | rs113219478S7  | DIAPH1        | 4.36E-07 | 1.00E+00 | 2.89E-04    | 1.62E-06 | 1.00E+00 | 1.72E-03 |
| phe.Fasting_rs10212542 S7 | FANCD2 | rs116279995S20 | "PCDHGA4,PI   | 6.20E-07 | 1        | 0.000397692 | 3.53E-06 | 1.00E+00 | 3.38E-03 |
| phe.Fasting_rs10212542 S7 | FANCD2 | rs138090701S5  | HDAC3         | 9.73E-07 | 1        | 0.000591548 | 5.73E-06 | 1.00E+00 | 5.12E-03 |
| phe.Fasting_rs10212542 S7 | FANCD2 | rs138136869S7  | DIAPH1        | 7.49E-08 | 1.00E+00 | 5.87E-05    | 2.85E-07 | 1.00E+00 | 3.62E-04 |
| phe.Fasting_rs10212542 S7 | FANCD2 | rs138457103S10 | DIAPH1        | 2.44E-07 | 1.00E+00 | 1.71E-04    | 1.37E-06 | 1.00E+00 | 1.49E-03 |
| phe.Fasting_rs10212542 S7 | FANCD2 | rs138487229S11 | DIAPH1        | 4.36E-07 | 1.00E+00 | 2.89E-04    | 1.62E-06 | 1.00E+00 | 1.72E-03 |
| phe.Fasting_rs10212542 S7 | FANCD2 | rs138738950S8  | "PCDHGB2,PI   | 4.36E-07 | 1        | 0.000289116 | 1.61E-06 | 1.00E+00 | 1.71E-03 |
| phe.Fasting_rs10212542 S7 | FANCD2 | rs139297927S8  | DIAPH1        | 4.36E-07 | 1        | 0.000289116 | 1.62E-06 | 1.00E+00 | 1.72E-03 |
| phe.Fasting_rs10212542 S7 | FANCD2 | rs139337303S8  | DIAPH1        | 4.36E-07 | 1        | 0.000289116 | 1.62E-06 | 1.00E+00 | 1.72E-03 |
| phe.Fasting_rs10212542 S7 | FANCD2 | rs139403963S8  | DIAPH1        | 7.49E-08 | 1        | 5.87E-05    | 2.85E-07 | 1.00E+00 | 3.62E-04 |
| phe.Fasting_rs10212542 S7 | FANCD2 | rs139621309S18 | "LOC100505056 | 4.36E-07 | 1        | 0.000289116 | 1.62E-06 | 1.00E+00 | 1.72E-03 |
| phe.Fasting_rs10212542 S7 | FANCD2 | rs139828110S8  | DIAPH1        | 7.49E-08 | 1        | 5.87E-05    | 2.85E-07 | 1.00E+00 | 3.62E-04 |
| phe.Fasting_rs10212542 S7 | FANCD2 | rs140070363S8  | DIAPH1        | 4.36E-07 | 1        | 0.000289116 | 1.62E-06 | 1.00E+00 | 1.72E-03 |
| phe.Fasting_rs10212542 S7 | FANCD2 | rs140644750S13 | DIAPH1        | 4.36E-07 | 1.00E+00 | 2.89E-04    | 1.62E-06 | 1.00E+00 | 1.72E-03 |
| phe.Fasting_rs10212542 S7 | FANCD2 | rs141022544S8  | DIAPH1        | 4.36E-07 | 1.00E+00 | 2.89E-04    | 1.62E-06 | 1.00E+00 | 1.72E-03 |
| phe.Fasting_rs10212542 S7 | FANCD2 | rs141525984S5  | DIAPH1        | 4.36E-07 | 1.00E+00 | 2.89E-04    | 1.62E-06 | 1.00E+00 | 1.72E-03 |
| phe.Fasting_rs10212542 S7 | FANCD2 | rs141692339S3  | "PCDHGA6,PI   | 8.21E-07 | 1.00E+00 | 5.08E-04    | 5.19E-06 | 1.00E+00 | 4.72E-03 |
| phe.Fasting_rs10212542 S7 | FANCD2 | rs141926074S8  | ATE1          | 2.88E-07 | 1.00E+00 | 1.99E-04    | 2.16E-06 | 1.00E+00 | 2.21E-03 |
| phe.Fasting_rs10212542 S7 | FANCD2 | rs142480565S8  | DIAPH1        | 4.36E-07 | 1.00E+00 | 2.89E-04    | 1.62E-06 | 1.00E+00 | 1.72E-03 |
| phe.Fasting_rs10212542 S7 | FANCD2 | rs142718558S7  | "DIAPH1,LOC   | 4.36E-07 | 1        | 0.000289116 | 1.62E-06 | 1.00E+00 | 1.72E-03 |
| phe.Fasting_rs10212542 S7 | FANCD2 | rs142789100S8  | DIAPH1        | 7.49E-08 | 1.00E+00 | 5.87E-05    | 2.85E-07 | 1.00E+00 | 3.62E-04 |
| phe.Fasting_rs10212542 S7 | FANCD2 | rs142812798S7  | DIAPH1        | 7.49E-08 | 1.00E+00 | 5.87E-05    | 2.85E-07 | 1.00E+00 | 3.62E-04 |
| phe.Fasting_rs10212542 S7 | FANCD2 | rs143377827S13 | "DIAPH1,LOC   | 8.22E-08 | 1.00E+00 | 6.39E-05    | 2.35E-07 | 1.00E+00 | 3.05E-04 |
| phe.Fasting_rs10212542 S7 | FANCD2 | rs143691978S11 | DIAPH1        | 7.49E-08 | 1.00E+00 | 5.87E-05    | 2.97E-07 | 1.00E+00 | 3.76E-04 |
| phe.Fasting_rs10212542 S7 | FANCD2 | rs144081334S11 | DIAPH1        | 7.49E-08 | 1.00E+00 | 5.87E-05    | 2.97E-07 | 1.00E+00 | 3.76E-04 |
| phe.Fasting_rs10212542 S7 | FANCD2 | rs144613910S8  | DIAPH1        | 4.36E-07 | 1        | 0.000289116 | 1.62E-06 | 1.00E+00 | 1.72E-03 |
| phe.Fasting_rs10212542 S7 | FANCD2 | rs145027704S11 | DIAPH1        | 7.49E-08 | 1.00E+00 | 5.87E-05    | 2.97E-07 | 1.00E+00 | 3.76E-04 |
| phe.Fasting_rs10212542 S7 | FANCD2 | rs146220673S7  | DIAPH1        | 4.36E-07 | 1        | 0.000289116 | 1.62E-06 | 1.00E+00 | 1.72E-03 |
| phe.Fasting_rs10212542 S7 | FANCD2 | rs146622060S13 | DIAPH1        | 7.49E-08 | 1        | 5.87E-05    | 2.97E-07 | 1.00E+00 | 3.76E-04 |
| phe.Fasting_rs10212542 S7 | FANCD2 | rs146878162S7  | DIAPH1        | 4.36E-07 | 1        | 0.000289116 | 1.62E-06 | 1.00E+00 | 1.72E-03 |
| phe.Fasting_rs10212542 S7 | FANCD2 | rs147314451S8  | DIAPH1        | 4.36E-07 | 1        | 0.000289116 | 1.62E-06 | 1.00E+00 | 1.72E-03 |
| phe.Fasting_rs10212542 S7 | FANCD2 | rs147417996S7  | DIAPH1        | 7.49E-08 | 1        | 5.87E-05    | 2.97E-07 | 1.00E+00 | 3.76E-04 |
| phe.Fasting_rs10212542 S7 | FANCD2 | rs147506725S21 | "PCDHGA1,PI   | 6.20E-07 | 1.00E+00 | 3.98E-04    | 3.53E-06 | 1.00E+00 | 3.38E-03 |
| phe.Fasting_rs10212542 S7 | FANCD2 | rs147646948S7  | "LOC100505056 | 4.36E-07 | 1.00E+00 | 2.89E-04    | 1.62E-06 | 1.00E+00 | 1.72E-03 |
| phe.Fasting_rs10212542 S7 | FANCD2 | rs147677041S8  | DIAPH1        | 7.49E-08 | 1.00E+00 | 5.87E-05    | 2.85E-07 | 1.00E+00 | 3.62E-04 |
| phe.Fasting_rs10212542 S7 | FANCD2 | rs148116628S7  | DIAPH1        | 4.36E-07 | 1.00E+00 | 2.89E-04    | 1.62E-06 | 1.00E+00 | 1.72E-03 |

|                        |    |        |             |     |             |          |          |             |          |          |          |
|------------------------|----|--------|-------------|-----|-------------|----------|----------|-------------|----------|----------|----------|
| phe.Fasting_rs10212542 | S7 | FANCD2 | rs148423011 | S7  | DIAPH1      | 4.36E-07 | 1.00E+00 | 2.89E-04    | 1.62E-06 | 1.00E+00 | 1.72E-03 |
| phe.Fasting_rs10212542 | S7 | FANCD2 | rs149019627 | S8  | DIAPH1      | 7.49E-08 | 1        | 5.87E-05    | 2.85E-07 | 1.00E+00 | 3.62E-04 |
| phe.Fasting_rs10212542 | S7 | FANCD2 | rs149075406 | S8  | DIAPH1      | 4.36E-07 | 1        | 0.000289116 | 1.62E-06 | 1.00E+00 | 1.72E-03 |
| phe.Fasting_rs10212542 | S7 | FANCD2 | rs149334783 | S8  | DIAPH1      | 4.36E-07 | 1        | 0.000289116 | 1.62E-06 | 1.00E+00 | 1.72E-03 |
| phe.Fasting_rs10212542 | S7 | FANCD2 | rs149553852 | S21 | "PCDHGA10,  | 6.20E-07 | 1        | 0.000397692 | 3.53E-06 | 1.00E+00 | 3.38E-03 |
| phe.Fasting_rs10212542 | S7 | FANCD2 | rs149716949 | S5  | DIAPH1      | 4.70E-08 | 1        | 3.87E-05    | 3.17E-07 | 1.00E+00 | 3.99E-04 |
| phe.Fasting_rs10212542 | S7 | FANCD2 | rs149791570 | S5  | DIAPH1      | 7.49E-08 | 1.00E+00 | 5.87E-05    | 2.85E-07 | 1.00E+00 | 3.62E-04 |
| phe.Fasting_rs10212542 | S7 | FANCD2 | rs150452206 | S13 | "DIAPH1,LOC | 4.36E-07 | 1.00E+00 | 2.89E-04    | 1.62E-06 | 1.00E+00 | 1.72E-03 |
| phe.Fasting_rs10212542 | S7 | FANCD2 | rs150675915 | S7  | DIAPH1      | 4.36E-07 | 1.00E+00 | 2.89E-04    | 1.62E-06 | 1.00E+00 | 1.72E-03 |
| phe.Fasting_rs10212542 | S7 | FANCD2 | rs150765570 | S7  | DIAPH1      | 4.36E-07 | 1.00E+00 | 2.89E-04    | 1.62E-06 | 1.00E+00 | 1.72E-03 |
| phe.Fasting_rs10212542 | S7 | FANCD2 | rs150992994 | S11 | "PCDHGA5,PI | 4.50E-07 | 1.00E+00 | 2.98E-04    | 1.56E-06 | 1.00E+00 | 1.66E-03 |
| phe.Fasting_rs10212542 | S7 | FANCD2 | rs151204700 | S8  | DIAPH1      | 4.36E-07 | 1.00E+00 | 2.89E-04    | 1.62E-06 | 1.00E+00 | 1.72E-03 |
| phe.Fasting_rs10212542 | S7 | FANCD2 | rs151330468 | S8  | DIAPH1      | 7.49E-08 | 1.00E+00 | 5.87E-05    | 2.97E-07 | 1.00E+00 | 3.76E-04 |
| phe.Fasting_rs10212542 | S7 | FANCD2 | rs180772028 | S8  | "DIAPH1,LOC | 4.36E-07 | 1.00E+00 | 2.89E-04    | 1.62E-06 | 1.00E+00 | 1.72E-03 |
| phe.Fasting_rs10212542 | S7 | FANCD2 | rs181224861 | S7  | DIAPH1      | 4.36E-07 | 1.00E+00 | 2.89E-04    | 1.62E-06 | 1.00E+00 | 1.72E-03 |
| phe.Fasting_rs10212542 | S7 | FANCD2 | rs181247960 | S21 | "PCDHGA9,PI | 6.20E-07 | 1.00E+00 | 3.98E-04    | 3.53E-06 | 1.00E+00 | 3.38E-03 |
| phe.Fasting_rs10212542 | S7 | FANCD2 | rs181824655 | S21 | "PCDHGB6,PI | 6.20E-07 | 1.00E+00 | 3.98E-04    | 3.53E-06 | 1.00E+00 | 3.38E-03 |
| phe.Fasting_rs10212542 | S7 | FANCD2 | rs182714699 | S8  | DIAPH1      | 4.36E-07 | 1.00E+00 | 2.89E-04    | 1.62E-06 | 1.00E+00 | 1.72E-03 |
| phe.Fasting_rs10212542 | S7 | FANCD2 | rs182958142 | S8  | DIAPH1      | 2.15E-07 | 1.00E+00 | 1.52E-04    | 5.72E-06 | 1.00E+00 | 5.11E-03 |
| phe.Fasting_rs10212542 | S7 | FANCD2 | rs182965141 | S8  | DIAPH1      | 8.44E-08 | 1.00E+00 | 6.55E-05    | 3.00E-06 | 1.00E+00 | 2.92E-03 |
| phe.Fasting_rs10212542 | S7 | FANCD2 | rs183597049 | S7  | DIAPH1      | 4.36E-07 | 1.00E+00 | 2.89E-04    | 1.62E-06 | 1.00E+00 | 1.72E-03 |
| phe.Fasting_rs10212542 | S7 | FANCD2 | rs183980988 | S2  | NA          | 4.36E-07 | 1.00E+00 | 2.89E-04    | 1.62E-06 | 1.00E+00 | 1.72E-03 |
| phe.Fasting_rs10212542 | S7 | FANCD2 | rs184233232 | S7  | DIAPH1      | 4.36E-07 | 1.00E+00 | 2.89E-04    | 1.62E-06 | 1.00E+00 | 1.72E-03 |
| phe.Fasting_rs10212542 | S7 | FANCD2 | rs184509477 | S13 | "PCDHGB4,PI | 4.36E-07 | 1.00E+00 | 2.89E-04    | 1.62E-06 | 1.00E+00 | 1.72E-03 |
| phe.Fasting_rs10212542 | S7 | FANCD2 | rs185069296 | S15 | "LOC1005056 | 4.36E-07 | 1.00E+00 | 2.89E-04    | 1.62E-06 | 1.00E+00 | 1.72E-03 |
| phe.Fasting_rs10212542 | S7 | FANCD2 | rs185502834 | S8  | DIAPH1      | 7.49E-08 | 1.00E+00 | 5.87E-05    | 2.85E-07 | 1.00E+00 | 3.62E-04 |
| phe.Fasting_rs10212542 | S7 | FANCD2 | rs185759881 | S7  | DIAPH1      | 4.36E-07 | 1.00E+00 | 2.89E-04    | 1.62E-06 | 1.00E+00 | 1.72E-03 |
| phe.Fasting_rs10212542 | S7 | FANCD2 | rs186288044 | S21 | "PCDHGB4,PI | 6.20E-07 | 1.00E+00 | 3.98E-04    | 3.53E-06 | 1.00E+00 | 3.38E-03 |
| phe.Fasting_rs10212542 | S7 | FANCD2 | rs187000011 | S11 | DIAPH1      | 4.36E-07 | 1.00E+00 | 2.89E-04    | 1.62E-06 | 1.00E+00 | 1.72E-03 |
| phe.Fasting_rs10212542 | S7 | FANCD2 | rs188981295 | S5  | "RPS27AP10, | 4.36E-07 | 1.00E+00 | 2.89E-04    | 1.62E-06 | 1.00E+00 | 1.72E-03 |
| phe.Fasting_rs10212542 | S7 | FANCD2 | rs190559574 | S7  | DIAPH1      | 7.49E-08 | 1        | 5.87E-05    | 2.85E-07 | 1.00E+00 | 3.62E-04 |
| phe.Fasting_rs10212542 | S7 | FANCD2 | rs191544043 | S8  | DIAPH1      | 4.36E-07 | 1        | 0.000289116 | 1.62E-06 | 1.00E+00 | 1.72E-03 |
| phe.Fasting_rs10212542 | S7 | FANCD2 | rs191766712 | S7  | DIAPH1      | 4.36E-07 | 1        | 0.000289116 | 1.62E-06 | 1.00E+00 | 1.72E-03 |
| phe.Fasting_rs10212542 | S7 | FANCD2 | rs192690040 | S7  | DIAPH1      | 4.36E-07 | 1        | 0.000289116 | 1.62E-06 | 1.00E+00 | 1.72E-03 |
| phe.Fasting_rs10212542 | S7 | FANCD2 | rs192765219 | S7  | DIAPH1      | 4.36E-07 | 1        | 0.000289116 | 1.62E-06 | 1.00E+00 | 1.72E-03 |
| phe.Fasting_rs10212542 | S7 | FANCD2 | rs192770525 | S7  | DIAPH1      | 4.36E-07 | 1        | 0.000289116 | 1.62E-06 | 1.00E+00 | 1.72E-03 |
| phe.Fasting_rs10212542 | S7 | FANCD2 | rs35990401  | S7  | DIAPH1      | 3.35E-07 | 1        | 0.000229529 | 5.65E-07 | 1.00E+00 | 6.69E-04 |
| phe.Fasting_rs10212542 | S7 | FANCD2 | rs3856797   | S12 | VGLL4       | 1.22E-05 | 1        | 0.00541401  | 6.19E-07 | 1.00E+00 | 7.28E-04 |
| phe.Fasting_rs10212542 | S7 | FANCD2 | rs55900860  | S7  | DIAPH1      | 7.49E-08 | 1.00E+00 | 5.87E-05    | 2.85E-07 | 1.00E+00 | 3.62E-04 |
| phe.Fasting_rs10212542 | S7 | FANCD2 | rs57503635  | S3  | NA          | 3.60E-09 | 0.147212 | 3.63E-06    | 4.64E-17 | 1.89E-09 | 3.64E-12 |

|                         |     |        |             |     |             |          |          |             |          |          |          |
|-------------------------|-----|--------|-------------|-----|-------------|----------|----------|-------------|----------|----------|----------|
| phe.Fasting_rs10212542  | S7  | FANCD2 | rs79517926  | S15 | "DIAPH1,LOC | 1.06E-07 | 1        | 8.00E-05    | 2.93E-06 | 1.00E+00 | 2.87E-03 |
| phe.Fasting_rs10818995  | S15 | NA     | rs140524622 | S7  | MRPL10      | 9.15E-07 | 1.00E+00 | 5.59E-04    | 6.98E-08 | 1.00E+00 | 1.02E-04 |
| phe.Fasting_rs10818996  | S15 | NA     | rs140524622 | S7  | MRPL10      | 9.15E-07 | 1.00E+00 | 5.59E-04    | 6.98E-08 | 1.00E+00 | 1.02E-04 |
| phe.Fasting_rs10917006  | S24 | ALPL   | rs73392640  | S8  | POLR3B      | 4.22E-06 | 1.00E+00 | 2.15E-03    | 2.74E-08 | 1.00E+00 | 4.48E-05 |
| phe.Fasting_rs10954275  | S8  | COPG2  | rs116079984 | S8  | KPNA3       | 6.63E-06 | 1.00E+00 | 3.20E-03    | 3.88E-08 | 1.00E+00 | 6.09E-05 |
| phe.Fasting_rs10954275  | S8  | COPG2  | rs74627895  | S8  | TMEM64      | 2.30E-10 | 9.41E-03 | 2.82E-07    | 8.18E-06 | 1.00E+00 | 6.92E-03 |
| phe.Fasting_rs11121014  | S7  | CAMTA1 | rs115586038 | S5  | MICA        | 1.88E-18 | 7.67E-11 | 3.95E-14    | 3.41E-06 | 1.00E+00 | 3.27E-03 |
| phe.Fasting_rs11121014  | S7  | CAMTA1 | rs115967895 | S6  | MICA        | 7.08E-08 | 1.00E+00 | 5.60E-05    | 4.28E-06 | 1.00E+00 | 4.00E-03 |
| phe.Fasting_rs11121014  | S7  | CAMTA1 | rs2153597   | S8  | ZNF438      | 4.60E-07 | 1.00E+00 | 3.04E-04    | 1.79E-06 | 1.00E+00 | 1.88E-03 |
| phe.Fasting_rs11121014  | S7  | CAMTA1 | rs3741054   | S1  | ACAT1       | 3.51E-09 | 1.43E-01 | 3.54E-06    | 1.01E-05 | 1.00E+00 | 8.24E-03 |
| phe.Fasting_rs111576333 | S5  | TMEM64 | rs112348319 | S8  | SPTLC1      | 1.78E-07 | 1.00E+00 | 1.28E-04    | 3.60E-06 | 1.00E+00 | 3.43E-03 |
| phe.Fasting_rs111576333 | S5  | TMEM64 | rs112608164 | S8  | SPTLC1      | 1.78E-07 | 1.00E+00 | 1.28E-04    | 3.60E-06 | 1.00E+00 | 3.43E-03 |
| phe.Fasting_rs111576333 | S5  | TMEM64 | rs115787552 | S5  | KPNA3       | 1.88E-06 | 1.00E+00 | 1.06E-03    | 3.91E-15 | 1.59E-07 | 3.68E-11 |
| phe.Fasting_rs111576333 | S5  | TMEM64 | rs115888477 | S8  | NA          | 9.13E-06 | 1.00E+00 | 4.22E-03    | 6.14E-16 | 2.50E-08 | 1.16E-11 |
| phe.Fasting_rs111576333 | S5  | TMEM64 | rs116079984 | S8  | KPNA3       | 1.88E-06 | 1.00E+00 | 1.06E-03    | 4.62E-15 | 1.88E-07 | 4.28E-11 |
| phe.Fasting_rs111576333 | S5  | TMEM64 | rs141926074 | S8  | ATE1        | 1.17E-17 | 4.76E-10 | 1.03E-13    | 2.68E-06 | 1.00E+00 | 2.65E-03 |
| phe.Fasting_rs111576333 | S5  | TMEM64 | rs146815317 | S5  | KPNA3       | 1.88E-06 | 1.00E+00 | 1.06E-03    | 3.91E-15 | 1.59E-07 | 3.68E-11 |
| phe.Fasting_rs111576333 | S5  | TMEM64 | rs150117838 | S8  | KPNA3       | 1.88E-06 | 1.00E+00 | 1.06E-03    | 3.71E-15 | 1.51E-07 | 3.52E-11 |
| phe.Fasting_rs111576333 | S5  | TMEM64 | rs73283603  | S7  | ZWINT       | 3.14E-16 | 1.28E-08 | 1.04E-12    | 6.16E-09 | 2.51E-01 | 1.20E-05 |
| phe.Fasting_rs111576333 | S5  | TMEM64 | rs73392640  | S8  | POLR3B      | 1.29E-10 | 5.26E-03 | 1.64E-07    | 1.65E-14 | 6.72E-07 | 1.38E-10 |
| phe.Fasting_rs111576333 | S5  | TMEM64 | rs75758702  | S24 | NA          | 9.04E-08 | 1.00E+00 | 6.96E-05    | 3.10E-06 | 1.00E+00 | 3.01E-03 |
| phe.Fasting_rs111576333 | S5  | TMEM64 | rs76542405  | S5  | SPTLC1      | 1.78E-07 | 1.00E+00 | 1.28E-04    | 3.60E-06 | 1.00E+00 | 3.43E-03 |
| phe.Fasting_rs111576333 | S5  | TMEM64 | rs77523818  | S7  | SPTLC1      | 1.78E-07 | 1.00E+00 | 1.28E-04    | 3.60E-06 | 1.00E+00 | 3.43E-03 |
| phe.Fasting_rs111576333 | S5  | TMEM64 | rs77798597  | S7  | KPNA3       | 1.88E-06 | 1.00E+00 | 1.06E-03    | 3.71E-15 | 1.51E-07 | 3.52E-11 |
| phe.Fasting_rs111576333 | S5  | TMEM64 | rs78736524  | S5  | KPNA3       | 1.88E-06 | 1.00E+00 | 1.06E-03    | 3.91E-15 | 1.59E-07 | 3.68E-11 |
| phe.Fasting_rs111576333 | S5  | TMEM64 | rs79781495  | S8  | KPNA3       | 1.88E-06 | 1.00E+00 | 1.06E-03    | 3.71E-15 | 1.51E-07 | 3.52E-11 |
| phe.Fasting_rs111576333 | S5  | TMEM64 | rs80332465  | S5  | KPNA3       | 1.90E-06 | 1.00E+00 | 1.07E-03    | 4.00E-15 | 1.63E-07 | 3.75E-11 |
| phe.Fasting_rs111576333 | S5  | TMEM64 | rs80334773  | S5  | KPNA3       | 1.90E-06 | 1.00E+00 | 1.07E-03    | 4.00E-15 | 1.63E-07 | 3.75E-11 |
| phe.Fasting_rs111576333 | S5  | TMEM64 | rs8075478   | S8  | MYH10       | 1.56E-07 | 1.00E+00 | 1.14E-04    | 1.10E-06 | 1.00E+00 | 1.23E-03 |
| phe.Fasting_rs112009962 | S8  | NA     | rs139070959 | S8  | RPN2        | 8.65E-18 | 3.53E-10 | 8.93E-14    | 6.23E-15 | 2.54E-07 | 5.64E-11 |
| phe.Fasting_rs112009962 | S8  | NA     | rs145412529 | S8  | "RBL1,RPS3A | 5.02E-18 | 2.05E-10 | 6.85E-14    | 8.03E-12 | 3.27E-04 | 3.03E-08 |
| phe.Fasting_rs112009962 | S8  | NA     | rs57503635  | S3  | NA          | 1.57E-06 | 1        | 0.000908628 | 1.76E-06 | 1.00E+00 | 1.85E-03 |
| phe.Fasting_rs112027720 | S7  | DIAPH1 | rs111576333 | S5  | TMEM64      | 2.37E-06 | 1        | 0.00129547  | 5.87E-14 | 2.39E-06 | 3.99E-10 |
| phe.Fasting_rs112027720 | S7  | DIAPH1 | rs112089881 | S8  | ZFAND4      | 2.04E-17 | 8.32E-10 | 1.43E-13    | 1.09E-09 | 4.45E-02 | 2.58E-06 |
| phe.Fasting_rs112027720 | S7  | DIAPH1 | rs112091318 | S5  | TMEM64      | 7.32E-07 | 1        | 0.000459899 | 3.91E-08 | 1.00E+00 | 6.13E-05 |
| phe.Fasting_rs112027720 | S7  | DIAPH1 | rs114334325 | S7  | AP3M2       | 4.51E-15 | 1.84E-07 | 1.18E-11    | 3.87E-07 | 1.00E+00 | 4.75E-04 |
| phe.Fasting_rs112027720 | S7  | DIAPH1 | rs114394395 | S7  | AP3M2       | 4.81E-15 | 1.97E-07 | 1.25E-11    | 3.87E-07 | 1.00E+00 | 4.75E-04 |
| phe.Fasting_rs112027720 | S7  | DIAPH1 | rs114565620 | S8  | RCL1        | 1.82E-16 | 7.42E-09 | 6.37E-13    | 3.70E-08 | 1.00E+00 | 5.84E-05 |
| phe.Fasting_rs112027720 | S7  | DIAPH1 | rs115083290 | S19 | NA          | 4.38E-16 | 1.79E-08 | 1.40E-12    | 1.42E-08 | 5.77E-01 | 2.53E-05 |
| phe.Fasting_rs112027720 | S7  | DIAPH1 | rs11524145  | S5  | CDK6        | 7.80E-07 | 1.00E+00 | 4.86E-04    | 7.89E-06 | 1.00E+00 | 6.69E-03 |

|              |               |        |                |           |          |            |          |          |          |          |
|--------------|---------------|--------|----------------|-----------|----------|------------|----------|----------|----------|----------|
| phe.Fasting_ | rs112027720S7 | DIAPH1 | rs115752779S19 | NA        | 4.38E-16 | 1.79E-08   | 1.40E-12 | 1.42E-08 | 5.77E-01 | 2.53E-05 |
| phe.Fasting_ | rs112027720S7 | DIAPH1 | rs115787552S5  | KPNA3     | 2.97E-15 | 1.21E-07   | 8.14E-12 | 1.18E-13 | 4.80E-06 | 7.06E-10 |
| phe.Fasting_ | rs112027720S7 | DIAPH1 | rs115888477S8  | NA        | 2.03E-14 | 8.28E-07   | 5.02E-11 | 2.21E-14 | 8.99E-07 | 1.73E-10 |
| phe.Fasting_ | rs112027720S7 | DIAPH1 | rs116011837S9  | BRD2      | 4.89E-11 | 0.00199774 | 6.62E-08 | 4.07E-14 | 1.66E-06 | 2.85E-10 |
| phe.Fasting_ | rs112027720S7 | DIAPH1 | rs116079984S8  | KPNA3     | 2.97E-15 | 1.21E-07   | 8.14E-12 | 1.24E-13 | 5.04E-06 | 7.34E-10 |
| phe.Fasting_ | rs112027720S7 | DIAPH1 | rs116120727S9  | BRD2      | 4.89E-11 | 0.00199774 | 6.62E-08 | 4.07E-14 | 1.66E-06 | 2.85E-10 |
| phe.Fasting_ | rs112027720S7 | DIAPH1 | rs116406581S2  | NA        | 1.81E-14 | 7.39E-07   | 4.52E-11 | 2.35E-07 | 1.00E+00 | 3.05E-04 |
| phe.Fasting_ | rs112027720S7 | DIAPH1 | rs116548615S8  | TMEM45B   | 1.73E-16 | 7.06E-09   | 6.15E-13 | 8.70E-12 | 3.54E-04 | 3.26E-08 |
| phe.Fasting_ | rs112027720S7 | DIAPH1 | rs116696844S3  | AP3M2     | 6.92E-15 | 2.83E-07   | 1.78E-11 | 3.87E-07 | 1.00E+00 | 4.75E-04 |
| phe.Fasting_ | rs112027720S7 | DIAPH1 | rs11989304 S4  | TMEM64    | 2.37E-06 | 1.00E+00   | 1.30E-03 | 6.78E-11 | 2.76E-03 | 2.13E-07 |
| phe.Fasting_ | rs112027720S7 | DIAPH1 | rs140524622S7  | MRPL10    | 1.08E-16 | 4.41E-09   | 4.54E-13 | 7.35E-06 | 1.00E+00 | 6.31E-03 |
| phe.Fasting_ | rs112027720S7 | DIAPH1 | rs146815317S5  | KPNA3     | 2.97E-15 | 1.21E-07   | 8.14E-12 | 1.18E-13 | 4.80E-06 | 7.06E-10 |
| phe.Fasting_ | rs112027720S7 | DIAPH1 | rs150117838S8  | KPNA3     | 2.97E-15 | 1.21E-07   | 8.14E-12 | 1.09E-13 | 4.44E-06 | 6.79E-10 |
| phe.Fasting_ | rs112027720S7 | DIAPH1 | rs150916187S4  | HIST1H2BK | 1.38E-05 | 1.00E+00   | 6.05E-03 | 1.37E-14 | 5.59E-07 | 1.16E-10 |
| phe.Fasting_ | rs112027720S7 | DIAPH1 | rs16894241 S4  | HIST1H2BK | 1.99E-11 | 8.12E-04   | 2.96E-08 | 3.44E-14 | 1.40E-06 | 2.50E-10 |
| phe.Fasting_ | rs112027720S7 | DIAPH1 | rs2032062 S8   | NA        | 1.22E-14 | 4.98E-07   | 3.09E-11 | 8.48E-06 | 1.00E+00 | 7.14E-03 |
| phe.Fasting_ | rs112027720S7 | DIAPH1 | rs2153597 S8   | ZNF438    | 5.51E-11 | 2.25E-03   | 7.42E-08 | 4.52E-09 | 1.84E-01 | 9.08E-06 |
| phe.Fasting_ | rs112027720S7 | DIAPH1 | rs2835656 S7   | TTC3      | 3.01E-10 | 1.23E-02   | 3.60E-07 | 9.12E-06 | 1.00E+00 | 7.57E-03 |
| phe.Fasting_ | rs112027720S7 | DIAPH1 | rs34801978 S3  | HOXB2     | 1.23E-05 | 1.00E+00   | 5.46E-03 | 1.03E-08 | 4.19E-01 | 1.90E-05 |
| phe.Fasting_ | rs112027720S7 | DIAPH1 | rs352346 S3    | GRPEL2    | 1.85E-11 | 7.55E-04   | 2.78E-08 | 8.42E-06 | 1.00E+00 | 7.10E-03 |
| phe.Fasting_ | rs112027720S7 | DIAPH1 | rs3750898 S8   | DCLRE1A   | 2.29E-05 | 1.00E+00   | 9.35E-03 | 8.76E-06 | 1.00E+00 | 7.32E-03 |
| phe.Fasting_ | rs112027720S7 | DIAPH1 | rs4732511 S13  | POR       | 2.30E-15 | 9.39E-08   | 6.48E-12 | 9.65E-06 | 1.00E+00 | 7.93E-03 |
| phe.Fasting_ | rs112027720S7 | DIAPH1 | rs57503635 S3  | NA        | 6.34E-16 | 2.59E-08   | 1.95E-12 | 3.17E-14 | 1.29E-06 | 2.34E-10 |
| phe.Fasting_ | rs112027720S7 | DIAPH1 | rs58905476 S7  | TTC3      | 3.29E-10 | 0.0134302  | 3.90E-07 | 9.79E-06 | 1.00E+00 | 8.01E-03 |
| phe.Fasting_ | rs112027720S7 | DIAPH1 | rs60011869 S16 | NA        | 1.04E-05 | 1.00E+00   | 4.72E-03 | 8.16E-10 | 3.32E-02 | 1.98E-06 |
| phe.Fasting_ | rs112027720S7 | DIAPH1 | rs6964407 S7   | POR       | 7.55E-15 | 3.08E-07   | 1.94E-11 | 8.91E-06 | 1.00E+00 | 7.43E-03 |
| phe.Fasting_ | rs112027720S7 | DIAPH1 | rs7004597 S8   | NA        | 4.51E-15 | 1.84E-07   | 1.18E-11 | 2.34E-07 | 1.00E+00 | 3.04E-04 |
| phe.Fasting_ | rs112027720S7 | DIAPH1 | rs7256517 S7   | CYTH2     | 1.04E-15 | 4.24E-08   | 3.06E-12 | 4.82E-12 | 1.96E-04 | 1.91E-08 |
| phe.Fasting_ | rs112027720S7 | DIAPH1 | rs73283603 S7  | ZWINT     | 1.90E-06 | 1.00E+00   | 1.07E-03 | 2.03E-07 | 1.00E+00 | 2.68E-04 |
| phe.Fasting_ | rs112027720S7 | DIAPH1 | rs73392640 S8  | POLR3B    | 2.02E-10 | 8.26E-03   | 2.49E-07 | 5.19E-11 | 2.11E-03 | 1.67E-07 |
| phe.Fasting_ | rs112027720S7 | DIAPH1 | rs734069 S19   | NA        | 2.06E-08 | 8.39E-01   | 1.81E-05 | 6.71E-10 | 2.73E-02 | 1.68E-06 |
| phe.Fasting_ | rs112027720S7 | DIAPH1 | rs73619637 S8  | NA        | 1.44E-15 | 5.89E-08   | 4.14E-12 | 2.05E-10 | 8.34E-03 | 5.78E-07 |
| phe.Fasting_ | rs112027720S7 | DIAPH1 | rs74627895 S8  | TMEM64    | 7.32E-07 | 1.00E+00   | 4.60E-04 | 2.03E-08 | 8.28E-01 | 3.48E-05 |
| phe.Fasting_ | rs112027720S7 | DIAPH1 | rs74914207 S24 | NA        | 1.37E-10 | 5.59E-03   | 1.73E-07 | 9.12E-11 | 3.71E-03 | 2.80E-07 |
| phe.Fasting_ | rs112027720S7 | DIAPH1 | rs75350765 S5  | RCL1      | 1.82E-16 | 7.42E-09   | 6.37E-13 | 3.70E-08 | 1.00E+00 | 5.84E-05 |
| phe.Fasting_ | rs112027720S7 | DIAPH1 | rs75374128 S5  | CNTLN     | 1.47E-16 | 6.01E-09   | 5.72E-13 | 1.01E-07 | 1.00E+00 | 1.42E-04 |
| phe.Fasting_ | rs112027720S7 | DIAPH1 | rs75506779 S5  | TMCO3     | 5.55E-07 | 1.00E+00   | 3.61E-04 | 1.10E-08 | 4.50E-01 | 2.03E-05 |
| phe.Fasting_ | rs112027720S7 | DIAPH1 | rs75758702 S24 | NA        | 7.02E-17 | 2.87E-09   | 3.16E-13 | 1.57E-10 | 6.38E-03 | 4.59E-07 |
| phe.Fasting_ | rs112027720S7 | DIAPH1 | rs75864203 S8  | CNTLN     | 1.47E-16 | 6.01E-09   | 5.72E-13 | 1.01E-07 | 1.00E+00 | 1.42E-04 |
| phe.Fasting_ | rs112027720S7 | DIAPH1 | rs75949566 S5  | TMEM64    | 2.76E-06 | 1.00E+00   | 1.47E-03 | 8.48E-11 | 3.45E-03 | 2.62E-07 |



|                           |        |             |     |            |          |            |             |          |          |          |
|---------------------------|--------|-------------|-----|------------|----------|------------|-------------|----------|----------|----------|
| phe.Fasting_rs112027720S7 | DIAPH1 | rs76844308  | S8  | CNTLN      | 7.68E-17 | 3.14E-09   | 3.41E-13    | 9.52E-08 | 1.00E+00 | 1.35E-04 |
| phe.Fasting_rs112027720S7 | DIAPH1 | rs7763107   | S8  | FARS2      | 5.78E-16 | 2.36E-08   | 1.79E-12    | 9.23E-12 | 3.76E-04 | 3.44E-08 |
| phe.Fasting_rs112027720S7 | DIAPH1 | rs77798597  | S7  | KPNA3      | 2.97E-15 | 1.21E-07   | 8.14E-12    | 1.09E-13 | 4.44E-06 | 6.79E-10 |
| phe.Fasting_rs112027720S7 | DIAPH1 | rs77845645  | S21 | NA         | 1.53E-06 | 1          | 0.000888475 | 4.20E-11 | 1.71E-03 | 1.38E-07 |
| phe.Fasting_rs112027720S7 | DIAPH1 | rs78353402  | S8  | AP3M2      | 4.51E-15 | 1.84E-07   | 1.18E-11    | 3.87E-07 | 1.00E+00 | 4.75E-04 |
| phe.Fasting_rs112027720S7 | DIAPH1 | rs78516788  | S8  | SLC38A1    | 2.75E-11 | 0.00112269 | 3.94E-08    | 2.44E-10 | 9.93E-03 | 6.74E-07 |
| phe.Fasting_rs112027720S7 | DIAPH1 | rs78697063  | S5  | MSI2       | 8.23E-19 | 3.36E-11   | 2.70E-14    | 6.84E-10 | 2.78E-02 | 1.70E-06 |
| phe.Fasting_rs112027720S7 | DIAPH1 | rs78722272  | S5  | CNTLN      | 1.47E-16 | 6.01E-09   | 5.72E-13    | 1.05E-07 | 1.00E+00 | 1.48E-04 |
| phe.Fasting_rs112027720S7 | DIAPH1 | rs78736524  | S5  | KPNA3      | 2.97E-15 | 1.21E-07   | 8.14E-12    | 1.18E-13 | 4.80E-06 | 7.06E-10 |
| phe.Fasting_rs112027720S7 | DIAPH1 | rs78990344  | S2  | LOC1005063 | 2.37E-06 | 1.00E+00   | 1.30E-03    | 6.78E-11 | 2.76E-03 | 2.13E-07 |
| phe.Fasting_rs112027720S7 | DIAPH1 | rs79781495  | S8  | KPNA3      | 2.97E-15 | 1.21E-07   | 8.14E-12    | 1.09E-13 | 4.44E-06 | 6.79E-10 |
| phe.Fasting_rs112027720S7 | DIAPH1 | rs79886603  | S15 | NA         | 8.71E-08 | 1          | 6.74E-05    | 4.66E-07 | 1.00E+00 | 5.59E-04 |
| phe.Fasting_rs112027720S7 | DIAPH1 | rs80200953  | S8  | PPP2R5D    | 8.49E-17 | 3.47E-09   | 3.69E-13    | 3.65E-09 | 1.48E-01 | 7.55E-06 |
| phe.Fasting_rs112027720S7 | DIAPH1 | rs80332465  | S5  | KPNA3      | 3.13E-15 | 1.28E-07   | 8.51E-12    | 1.17E-13 | 4.77E-06 | 7.06E-10 |
| phe.Fasting_rs112027720S7 | DIAPH1 | rs80334773  | S5  | KPNA3      | 3.13E-15 | 1.28E-07   | 8.51E-12    | 1.17E-13 | 4.77E-06 | 7.06E-10 |
| phe.Fasting_rs112089881S8 | ZFAND4 | rs115787552 | S5  | KPNA3      | 5.82E-07 | 1          | 0.000376379 | 6.03E-08 | 1.00E+00 | 9.08E-05 |
| phe.Fasting_rs112089881S8 | ZFAND4 | rs115888477 | S8  | NA         | 5.98E-06 | 1          | 0.00291466  | 1.15E-08 | 4.69E-01 | 2.11E-05 |
| phe.Fasting_rs112089881S8 | ZFAND4 | rs116079984 | S8  | KPNA3      | 5.82E-07 | 1          | 0.000376379 | 7.70E-08 | 1.00E+00 | 1.12E-04 |
| phe.Fasting_rs112089881S8 | ZFAND4 | rs140524622 | S7  | MRPL10     | 5.20E-08 | 1          | 4.24E-05    | 8.93E-18 | 3.63E-10 | 1.40E-12 |
| phe.Fasting_rs112089881S8 | ZFAND4 | rs141926074 | S8  | ATE1       | 7.45E-19 | 3.04E-11   | 2.69E-14    | 4.47E-09 | 1.82E-01 | 9.03E-06 |
| phe.Fasting_rs112089881S8 | ZFAND4 | rs146815317 | S5  | KPNA3      | 5.82E-07 | 1          | 0.000376379 | 6.03E-08 | 1.00E+00 | 9.08E-05 |
| phe.Fasting_rs112089881S8 | ZFAND4 | rs150117838 | S8  | KPNA3      | 5.82E-07 | 1          | 0.000376379 | 5.96E-08 | 1.00E+00 | 9.00E-05 |
| phe.Fasting_rs112089881S8 | ZFAND4 | rs7256517   | S7  | CYTH2      | 1.08E-05 | 1          | 0.00491215  | 1.71E-06 | 1.00E+00 | 1.80E-03 |
| phe.Fasting_rs112089881S8 | ZFAND4 | rs73283603  | S7  | ZWINT      | 1.55E-08 | 0.634958   | 1.40E-05    | 5.05E-09 | 2.06E-01 | 1.01E-05 |
| phe.Fasting_rs112089881S8 | ZFAND4 | rs73392640  | S8  | POLR3B     | 8.63E-11 | 3.52E-03   | 1.13E-07    | 8.14E-09 | 3.31E-01 | 1.55E-05 |
| phe.Fasting_rs112089881S8 | ZFAND4 | rs73619637  | S8  | NA         | 3.10E-07 | 1          | 0.000213828 | 1.50E-09 | 6.11E-02 | 3.41E-06 |
| phe.Fasting_rs112089881S8 | ZFAND4 | rs77798597  | S7  | KPNA3      | 5.82E-07 | 1          | 0.000376379 | 5.96E-08 | 1.00E+00 | 9.00E-05 |
| phe.Fasting_rs112089881S8 | ZFAND4 | rs78736524  | S5  | KPNA3      | 5.82E-07 | 1          | 0.000376379 | 6.03E-08 | 1.00E+00 | 9.08E-05 |
| phe.Fasting_rs112089881S8 | ZFAND4 | rs79781495  | S8  | KPNA3      | 5.82E-07 | 1          | 0.000376379 | 5.96E-08 | 1.00E+00 | 9.00E-05 |
| phe.Fasting_rs112089881S8 | ZFAND4 | rs80332465  | S5  | KPNA3      | 8.05E-07 | 1          | 0.000500772 | 6.21E-08 | 1.00E+00 | 9.34E-05 |
| phe.Fasting_rs112089881S8 | ZFAND4 | rs80334773  | S5  | KPNA3      | 8.05E-07 | 1          | 0.000500772 | 6.21E-08 | 1.00E+00 | 9.34E-05 |
| phe.Fasting_rs112089881S8 | ZFAND4 | rs8075478   | S8  | MYH10      | 2.35E-05 | 1          | 0.0095888   | 8.99E-08 | 1.00E+00 | 1.29E-04 |
| phe.Fasting_rs112091318S5 | TMEM64 | rs112348319 | S8  | SPTLC1     | 1.41E-17 | 5.75E-10   | 1.14E-13    | 4.32E-06 | 1.00E+00 | 4.04E-03 |
| phe.Fasting_rs112091318S5 | TMEM64 | rs112608164 | S8  | SPTLC1     | 1.41E-17 | 5.75E-10   | 1.14E-13    | 4.32E-06 | 1.00E+00 | 4.04E-03 |
| phe.Fasting_rs112091318S5 | TMEM64 | rs115787552 | S5  | KPNA3      | 2.06E-16 | 8.43E-09   | 7.10E-13    | 5.89E-15 | 2.40E-07 | 5.36E-11 |
| phe.Fasting_rs112091318S5 | TMEM64 | rs115888477 | S8  | NA         | 1.42E-15 | 5.80E-08   | 4.09E-12    | 8.94E-16 | 3.64E-08 | 1.16E-11 |
| phe.Fasting_rs112091318S5 | TMEM64 | rs116079984 | S8  | KPNA3      | 2.06E-16 | 8.43E-09   | 7.10E-13    | 7.16E-15 | 2.91E-07 | 6.38E-11 |
| phe.Fasting_rs112091318S5 | TMEM64 | rs146815317 | S5  | KPNA3      | 2.06E-16 | 8.43E-09   | 7.10E-13    | 5.89E-15 | 2.40E-07 | 5.36E-11 |
| phe.Fasting_rs112091318S5 | TMEM64 | rs1470889   | S5  | ZC3H3      | 4.97E-08 | 1          | 4.07E-05    | 1.82E-07 | 1.00E+00 | 2.44E-04 |
| phe.Fasting_rs112091318S5 | TMEM64 | rs1470890   | S5  | ZC3H3      | 4.97E-08 | 1          | 4.07E-05    | 1.82E-07 | 1.00E+00 | 2.44E-04 |

|                           |        |                |           |          |           |             |          |          |          |
|---------------------------|--------|----------------|-----------|----------|-----------|-------------|----------|----------|----------|
| phe.Fasting_rs112091318S5 | TMEM64 | rs150117838S8  | KPNA3     | 2.06E-16 | 8.43E-09  | 7.10E-13    | 5.57E-15 | 2.27E-07 | 5.09E-11 |
| phe.Fasting_rs112091318S5 | TMEM64 | rs2924507 S5   | ZC3H3     | 4.97E-08 | 1         | 4.07E-05    | 1.82E-07 | 1.00E+00 | 2.44E-04 |
| phe.Fasting_rs112091318S5 | TMEM64 | rs2924508 S8   | ZC3H3     | 4.97E-08 | 1         | 4.07E-05    | 1.42E-09 | 5.78E-02 | 3.24E-06 |
| phe.Fasting_rs112091318S5 | TMEM64 | rs2924511 S7   | ZC3H3     | 4.97E-08 | 1         | 4.07E-05    | 1.87E-07 | 1.00E+00 | 2.49E-04 |
| phe.Fasting_rs112091318S5 | TMEM64 | rs2924512 S7   | ZC3H3     | 1.06E-07 | 1         | 8.02E-05    | 2.25E-07 | 1.00E+00 | 2.94E-04 |
| phe.Fasting_rs112091318S5 | TMEM64 | rs2956376 S8   | ZC3H3     | 4.97E-08 | 1         | 4.07E-05    | 1.25E-07 | 1.00E+00 | 1.73E-04 |
| phe.Fasting_rs112091318S5 | TMEM64 | rs2980270 S7   | ZC3H3     | 4.97E-08 | 1         | 4.07E-05    | 1.25E-07 | 1.00E+00 | 1.73E-04 |
| phe.Fasting_rs112091318S5 | TMEM64 | rs2980272 S7   | ZC3H3     | 1.06E-07 | 1         | 8.02E-05    | 2.38E-07 | 1.00E+00 | 3.08E-04 |
| phe.Fasting_rs112091318S5 | TMEM64 | rs2980275 S5   | ZC3H3     | 4.97E-08 | 1         | 4.07E-05    | 1.82E-07 | 1.00E+00 | 2.44E-04 |
| phe.Fasting_rs112091318S5 | TMEM64 | rs366767 S5    | ZC3H3     | 7.52E-08 | 1.00E+00  | 5.89E-05    | 1.40E-07 | 1.00E+00 | 1.92E-04 |
| phe.Fasting_rs112091318S5 | TMEM64 | rs73283603 S7  | ZWINT     | 8.87E-17 | 3.62E-09  | 3.84E-13    | 8.93E-09 | 3.63E-01 | 1.69E-05 |
| phe.Fasting_rs112091318S5 | TMEM64 | rs73392640 S8  | POLR3B    | 9.88E-17 | 4.04E-09  | 4.23E-13    | 4.48E-08 | 1.00E+00 | 6.95E-05 |
| phe.Fasting_rs112091318S5 | TMEM64 | rs74701059 S24 | C17orf102 | 6.46E-07 | 1         | 4.12E-04    | 2.38E-06 | 1.00E+00 | 2.40E-03 |
| phe.Fasting_rs112091318S5 | TMEM64 | rs75758702 S24 | NA        | 5.00E-18 | 2.04E-10  | 6.84E-14    | 6.31E-06 | 1.00E+00 | 5.56E-03 |
| phe.Fasting_rs112091318S5 | TMEM64 | rs76542405 S5  | SPTLC1    | 1.41E-17 | 5.75E-10  | 1.14E-13    | 4.32E-06 | 1.00E+00 | 4.04E-03 |
| phe.Fasting_rs112091318S5 | TMEM64 | rs77523818 S7  | SPTLC1    | 1.41E-17 | 5.75E-10  | 1.14E-13    | 4.32E-06 | 1.00E+00 | 4.04E-03 |
| phe.Fasting_rs112091318S5 | TMEM64 | rs77798597 S7  | KPNA3     | 2.06E-16 | 8.43E-09  | 7.10E-13    | 5.57E-15 | 2.27E-07 | 5.09E-11 |
| phe.Fasting_rs112091318S5 | TMEM64 | rs78736524 S5  | KPNA3     | 2.06E-16 | 8.43E-09  | 7.10E-13    | 5.89E-15 | 2.40E-07 | 5.36E-11 |
| phe.Fasting_rs112091318S5 | TMEM64 | rs79703349 S24 | C17orf102 | 6.46E-07 | 1         | 4.12E-04    | 3.02E-06 | 1.00E+00 | 2.94E-03 |
| phe.Fasting_rs112091318S5 | TMEM64 | rs79781495 S8  | KPNA3     | 2.06E-16 | 8.43E-09  | 7.10E-13    | 5.57E-15 | 2.27E-07 | 5.09E-11 |
| phe.Fasting_rs112091318S5 | TMEM64 | rs80332465 S5  | KPNA3     | 2.06E-16 | 8.43E-09  | 7.10E-13    | 5.99E-15 | 2.44E-07 | 5.45E-11 |
| phe.Fasting_rs112091318S5 | TMEM64 | rs80334773 S5  | KPNA3     | 2.06E-16 | 8.43E-09  | 7.10E-13    | 5.99E-15 | 2.44E-07 | 5.45E-11 |
| phe.Fasting_rs112091318S5 | TMEM64 | rs8075478 S8   | MYH10     | 1.17E-17 | 4.79E-10  | 1.04E-13    | 1.43E-06 | 1.00E+00 | 1.56E-03 |
| phe.Fasting_rs112348319S8 | SPTLC1 | rs114968018S21 | NA        | 7.91E-14 | 3.23E-06  | 1.82E-10    | 1.22E-06 | 1.00E+00 | 1.35E-03 |
| phe.Fasting_rs112348319S8 | SPTLC1 | rs115305957S23 | NA        | 2.18E-06 | 1         | 1.21E-03    | 1.25E-11 | 5.08E-04 | 4.57E-08 |
| phe.Fasting_rs112348319S8 | SPTLC1 | rs115787552S5  | KPNA3     | 8.45E-06 | 1.00E+00  | 3.95E-03    | 1.44E-15 | 5.86E-08 | 1.61E-11 |
| phe.Fasting_rs112348319S8 | SPTLC1 | rs116079984S8  | KPNA3     | 8.45E-06 | 1.00E+00  | 3.95E-03    | 1.78E-15 | 7.24E-08 | 1.94E-11 |
| phe.Fasting_rs112348319S8 | SPTLC1 | rs12581352 S2  | NA        | 7.63E-18 | 3.12E-10  | 8.49E-14    | 2.07E-13 | 8.42E-06 | 1.15E-09 |
| phe.Fasting_rs112348319S8 | SPTLC1 | rs140524622S7  | MRPL10    | 4.51E-07 | 1.00E+00  | 2.98E-04    | 9.18E-09 | 3.74E-01 | 1.73E-05 |
| phe.Fasting_rs112348319S8 | SPTLC1 | rs146815317S5  | KPNA3     | 8.45E-06 | 1.00E+00  | 3.95E-03    | 1.44E-15 | 5.86E-08 | 1.61E-11 |
| phe.Fasting_rs112348319S8 | SPTLC1 | rs150117838S8  | KPNA3     | 8.45E-06 | 1.00E+00  | 3.95E-03    | 1.39E-15 | 5.68E-08 | 1.57E-11 |
| phe.Fasting_rs112348319S8 | SPTLC1 | rs4820499 S10  | PAC SIN2  | 3.11E-09 | 0.127003  | 3.16E-06    | 1.69E-09 | 6.89E-02 | 3.80E-06 |
| phe.Fasting_rs112348319S8 | SPTLC1 | rs57503635 S3  | NA        | 1.02E-06 | 1         | 0.00061519  | 3.81E-15 | 1.55E-07 | 3.60E-11 |
| phe.Fasting_rs112348319S8 | SPTLC1 | rs7256517 S7   | CYTH2     | 1.97E-13 | 8.05E-06  | 4.34E-10    | 8.09E-08 | 1.00E+00 | 1.17E-04 |
| phe.Fasting_rs112348319S8 | SPTLC1 | rs73392640 S8  | POLR3B    | 3.49E-07 | 1         | 0.000238236 | 2.52E-09 | 1.03E-01 | 5.42E-06 |
| phe.Fasting_rs112348319S8 | SPTLC1 | rs73619637 S8  | NA        | 6.45E-17 | 2.63E-09  | 2.97E-13    | 1.16E-08 | 4.71E-01 | 2.11E-05 |
| phe.Fasting_rs112348319S8 | SPTLC1 | rs74701059 S24 | C17orf102 | 2.09E-06 | 1         | 1.17E-03    | 1.43E-11 | 5.81E-04 | 5.16E-08 |
| phe.Fasting_rs112348319S8 | SPTLC1 | rs74914207 S24 | NA        | 3.96E-06 | 1         | 2.03E-03    | 5.67E-09 | 2.31E-01 | 1.11E-05 |
| phe.Fasting_rs112348319S8 | SPTLC1 | rs7511534 S12  | PAC SIN2  | 2.43E-09 | 0.0993832 | 2.51E-06    | 2.13E-09 | 8.67E-02 | 4.68E-06 |
| phe.Fasting_rs112348319S8 | SPTLC1 | rs77798597 S7  | KPNA3     | 8.45E-06 | 1         | 0.00394669  | 1.39E-15 | 5.68E-08 | 1.57E-11 |

|                           |        |                |             |          |           |             |          |          |          |
|---------------------------|--------|----------------|-------------|----------|-----------|-------------|----------|----------|----------|
| phe.Fasting_rs112348319S8 | SPTLC1 | rs78736524 S5  | KPNA3       | 8.45E-06 | 1         | 0.00394669  | 1.44E-15 | 5.86E-08 | 1.61E-11 |
| phe.Fasting_rs112348319S8 | SPTLC1 | rs79703349 S24 | C17orf102   | 2.09E-06 | 1         | 0.00116731  | 1.80E-11 | 7.34E-04 | 6.43E-08 |
| phe.Fasting_rs112348319S8 | SPTLC1 | rs79781495 S8  | KPNA3       | 8.45E-06 | 1         | 0.00394669  | 1.39E-15 | 5.68E-08 | 1.57E-11 |
| phe.Fasting_rs112348319S8 | SPTLC1 | rs80332465 S5  | KPNA3       | 1.20E-05 | 1         | 0.00535958  | 1.50E-15 | 6.12E-08 | 1.67E-11 |
| phe.Fasting_rs112348319S8 | SPTLC1 | rs80334773 S5  | KPNA3       | 1.20E-05 | 1         | 0.00535958  | 1.50E-15 | 6.12E-08 | 1.67E-11 |
| phe.Fasting_rs112608164S8 | SPTLC1 | rs114968018S21 | NA          | 7.91E-14 | 3.23E-06  | 1.82E-10    | 1.22E-06 | 1.00E+00 | 1.35E-03 |
| phe.Fasting_rs112608164S8 | SPTLC1 | rs115305957S23 | NA          | 2.18E-06 | 1         | 0.00120716  | 1.25E-11 | 5.08E-04 | 4.57E-08 |
| phe.Fasting_rs112608164S8 | SPTLC1 | rs115787552S5  | KPNA3       | 8.45E-06 | 1         | 0.00394669  | 1.44E-15 | 5.86E-08 | 1.61E-11 |
| phe.Fasting_rs112608164S8 | SPTLC1 | rs116079984S8  | KPNA3       | 8.45E-06 | 1         | 0.00394669  | 1.78E-15 | 7.24E-08 | 1.94E-11 |
| phe.Fasting_rs112608164S8 | SPTLC1 | rs12581352 S2  | NA          | 7.63E-18 | 3.12E-10  | 8.49E-14    | 2.07E-13 | 8.42E-06 | 1.15E-09 |
| phe.Fasting_rs112608164S8 | SPTLC1 | rs140524622S7  | MRPL10      | 4.51E-07 | 1         | 0.000298232 | 9.18E-09 | 3.74E-01 | 1.73E-05 |
| phe.Fasting_rs112608164S8 | SPTLC1 | rs146815317S5  | KPNA3       | 8.45E-06 | 1         | 0.00394669  | 1.44E-15 | 5.86E-08 | 1.61E-11 |
| phe.Fasting_rs112608164S8 | SPTLC1 | rs150117838S8  | KPNA3       | 8.45E-06 | 1         | 0.00394669  | 1.39E-15 | 5.68E-08 | 1.57E-11 |
| phe.Fasting_rs112608164S8 | SPTLC1 | rs4820499 S10  | PAC3IN2     | 3.11E-09 | 0.127003  | 3.16E-06    | 1.69E-09 | 6.89E-02 | 3.80E-06 |
| phe.Fasting_rs112608164S8 | SPTLC1 | rs57503635 S3  | NA          | 1.02E-06 | 1.00E+00  | 6.15E-04    | 3.81E-15 | 1.55E-07 | 3.60E-11 |
| phe.Fasting_rs112608164S8 | SPTLC1 | rs7256517 S7   | CYTH2       | 1.97E-13 | 8.05E-06  | 4.34E-10    | 8.09E-08 | 1.00E+00 | 1.17E-04 |
| phe.Fasting_rs112608164S8 | SPTLC1 | rs73392640 S8  | POLR3B      | 3.49E-07 | 1         | 0.000238236 | 2.52E-09 | 1.03E-01 | 5.42E-06 |
| phe.Fasting_rs112608164S8 | SPTLC1 | rs73619637 S8  | NA          | 6.45E-17 | 2.63E-09  | 2.97E-13    | 1.16E-08 | 4.71E-01 | 2.11E-05 |
| phe.Fasting_rs112608164S8 | SPTLC1 | rs74701059 S24 | C17orf102   | 2.09E-06 | 1         | 0.00116731  | 1.43E-11 | 5.81E-04 | 5.16E-08 |
| phe.Fasting_rs112608164S8 | SPTLC1 | rs74914207 S24 | NA          | 3.96E-06 | 1         | 0.002026    | 5.67E-09 | 2.31E-01 | 1.11E-05 |
| phe.Fasting_rs112608164S8 | SPTLC1 | rs7511534 S12  | PAC3IN2     | 2.43E-09 | 0.0993832 | 2.51E-06    | 2.13E-09 | 8.67E-02 | 4.68E-06 |
| phe.Fasting_rs112608164S8 | SPTLC1 | rs77798597 S7  | KPNA3       | 8.45E-06 | 1         | 0.00394669  | 1.39E-15 | 5.68E-08 | 1.57E-11 |
| phe.Fasting_rs112608164S8 | SPTLC1 | rs78736524 S5  | KPNA3       | 8.45E-06 | 1         | 0.00394669  | 1.44E-15 | 5.86E-08 | 1.61E-11 |
| phe.Fasting_rs112608164S8 | SPTLC1 | rs79703349 S24 | C17orf102   | 2.09E-06 | 1.00E+00  | 1.17E-03    | 1.80E-11 | 7.34E-04 | 6.43E-08 |
| phe.Fasting_rs112608164S8 | SPTLC1 | rs79781495 S8  | KPNA3       | 8.45E-06 | 1.00E+00  | 3.95E-03    | 1.39E-15 | 5.68E-08 | 1.57E-11 |
| phe.Fasting_rs112608164S8 | SPTLC1 | rs80332465 S5  | KPNA3       | 1.20E-05 | 1.00E+00  | 5.36E-03    | 1.50E-15 | 6.12E-08 | 1.67E-11 |
| phe.Fasting_rs112608164S8 | SPTLC1 | rs80334773 S5  | KPNA3       | 1.20E-05 | 1         | 0.00535958  | 1.50E-15 | 6.12E-08 | 1.67E-11 |
| phe.Fasting_rs112940854S5 | MYO1B  | rs112027720S7  | DIAPH1      | 3.87E-07 | 1         | 0.000261569 | 2.08E-11 | 8.49E-04 | 7.34E-08 |
| phe.Fasting_rs112940854S5 | MYO1B  | rs112089881S8  | ZFAND4      | 2.72E-17 | 1.11E-09  | 1.64E-13    | 3.02E-08 | 1.00E+00 | 4.91E-05 |
| phe.Fasting_rs112940854S5 | MYO1B  | rs113219478S7  | DIAPH1      | 3.87E-07 | 1         | 0.000261569 | 2.08E-11 | 8.49E-04 | 7.34E-08 |
| phe.Fasting_rs112940854S5 | MYO1B  | rs113357907S24 | ISL1        | 9.16E-17 | 3.74E-09  | 3.95E-13    | 1.29E-14 | 5.26E-07 | 1.10E-10 |
| phe.Fasting_rs112940854S5 | MYO1B  | rs114565620S8  | RCL1        | 3.95E-16 | 1.61E-08  | 1.28E-12    | 1.01E-05 | 1.00E+00 | 8.25E-03 |
| phe.Fasting_rs112940854S5 | MYO1B  | rs115787552S5  | KPNA3       | 3.32E-15 | 1.36E-07  | 9.02E-12    | 4.30E-06 | 1.00E+00 | 4.02E-03 |
| phe.Fasting_rs112940854S5 | MYO1B  | rs115888477S8  | NA          | 2.14E-14 | 8.74E-07  | 5.29E-11    | 1.06E-06 | 1.00E+00 | 1.19E-03 |
| phe.Fasting_rs112940854S5 | MYO1B  | rs116011837S9  | BRD2        | 4.92E-11 | 2.01E-03  | 6.66E-08    | 5.12E-09 | 2.09E-01 | 1.01E-05 |
| phe.Fasting_rs112940854S5 | MYO1B  | rs116079984S8  | KPNA3       | 3.32E-15 | 1.36E-07  | 9.02E-12    | 5.38E-06 | 1.00E+00 | 4.87E-03 |
| phe.Fasting_rs112940854S5 | MYO1B  | rs116120727S9  | BRD2        | 4.92E-11 | 2.01E-03  | 6.66E-08    | 5.12E-09 | 2.09E-01 | 1.01E-05 |
| phe.Fasting_rs112940854S5 | MYO1B  | rs116279995S20 | "PCDHGA4,Pi | 4.63E-06 | 1.00E+00  | 2.33E-03    | 9.97E-12 | 4.06E-04 | 3.69E-08 |
| phe.Fasting_rs112940854S5 | MYO1B  | rs12488988 S6  | PHC3        | 7.51E-07 | 1         | 4.70E-04    | 6.32E-11 | 2.57E-03 | 2.00E-07 |
| phe.Fasting_rs112940854S5 | MYO1B  | rs12492606 S8  | PHC3        | 7.51E-07 | 1.00E+00  | 4.70E-04    | 6.19E-11 | 2.52E-03 | 1.97E-07 |

|              |                |       |                 |             |          |          |             |          |          |          |
|--------------|----------------|-------|-----------------|-------------|----------|----------|-------------|----------|----------|----------|
| phe.Fasting_ | rs112940854 S5 | MYO1B | rs13400525 S8   | MFF         | 1.15E-15 | 4.69E-08 | 3.37E-12    | 2.01E-10 | 8.18E-03 | 5.71E-07 |
| phe.Fasting_ | rs112940854 S5 | MYO1B | rs138090701 S5  | HDAC3       | 7.07E-08 | 1.00E+00 | 5.59E-05    | 2.23E-11 | 9.09E-04 | 7.78E-08 |
| phe.Fasting_ | rs112940854 S5 | MYO1B | rs138136869 S7  | DIAPH1      | 1.25E-07 | 1.00E+00 | 9.30E-05    | 5.32E-12 | 2.16E-04 | 2.09E-08 |
| phe.Fasting_ | rs112940854 S5 | MYO1B | rs138457103 S10 | DIAPH1      | 2.67E-07 | 1.00E+00 | 1.86E-04    | 2.24E-11 | 9.10E-04 | 7.80E-08 |
| phe.Fasting_ | rs112940854 S5 | MYO1B | rs138487229 S11 | DIAPH1      | 3.87E-07 | 1.00E+00 | 2.62E-04    | 2.08E-11 | 8.49E-04 | 7.34E-08 |
| phe.Fasting_ | rs112940854 S5 | MYO1B | rs138738950 S8  | "PCDHGB2,PI | 3.87E-07 | 1.00E+00 | 2.62E-04    | 2.09E-11 | 8.52E-04 | 7.37E-08 |
| phe.Fasting_ | rs112940854 S5 | MYO1B | rs139297927 S8  | DIAPH1      | 3.87E-07 | 1.00E+00 | 2.62E-04    | 2.08E-11 | 8.49E-04 | 7.34E-08 |
| phe.Fasting_ | rs112940854 S5 | MYO1B | rs139337303 S8  | DIAPH1      | 3.87E-07 | 1.00E+00 | 2.62E-04    | 2.08E-11 | 8.49E-04 | 7.34E-08 |
| phe.Fasting_ | rs112940854 S5 | MYO1B | rs139403963 S8  | DIAPH1      | 1.25E-07 | 1.00E+00 | 9.30E-05    | 5.32E-12 | 2.16E-04 | 2.09E-08 |
| phe.Fasting_ | rs112940854 S5 | MYO1B | rs139621309 S18 | "LOC1005056 | 3.87E-07 | 1        | 2.62E-04    | 2.08E-11 | 8.49E-04 | 7.34E-08 |
| phe.Fasting_ | rs112940854 S5 | MYO1B | rs139828110 S8  | DIAPH1      | 1.25E-07 | 1        | 9.30E-05    | 5.32E-12 | 2.16E-04 | 2.09E-08 |
| phe.Fasting_ | rs112940854 S5 | MYO1B | rs140070363 S8  | DIAPH1      | 3.87E-07 | 1        | 2.62E-04    | 2.08E-11 | 8.49E-04 | 7.34E-08 |
| phe.Fasting_ | rs112940854 S5 | MYO1B | rs140524622 S7  | MRPL10      | 1.27E-16 | 5.21E-09 | 5.18E-13    | 3.29E-08 | 1.00E+00 | 5.26E-05 |
| phe.Fasting_ | rs112940854 S5 | MYO1B | rs140644750 S13 | DIAPH1      | 3.87E-07 | 1.00E+00 | 2.62E-04    | 2.08E-11 | 8.49E-04 | 7.34E-08 |
| phe.Fasting_ | rs112940854 S5 | MYO1B | rs141022544 S8  | DIAPH1      | 3.87E-07 | 1.00E+00 | 2.62E-04    | 2.08E-11 | 8.49E-04 | 7.34E-08 |
| phe.Fasting_ | rs112940854 S5 | MYO1B | rs141525984 S5  | DIAPH1      | 3.87E-07 | 1.00E+00 | 2.62E-04    | 2.08E-11 | 8.49E-04 | 7.34E-08 |
| phe.Fasting_ | rs112940854 S5 | MYO1B | rs141692339 S3  | "PCDHGA6,PI | 5.05E-06 | 1.00E+00 | 2.51E-03    | 1.43E-11 | 5.81E-04 | 5.16E-08 |
| phe.Fasting_ | rs112940854 S5 | MYO1B | rs141926074 S8  | ATE1        | 1.60E-17 | 6.51E-10 | 1.22E-13    | 1.23E-11 | 5.02E-04 | 4.52E-08 |
| phe.Fasting_ | rs112940854 S5 | MYO1B | rs142480565 S8  | DIAPH1      | 3.87E-07 | 1.00E+00 | 2.62E-04    | 2.08E-11 | 8.49E-04 | 7.34E-08 |
| phe.Fasting_ | rs112940854 S5 | MYO1B | rs142718558 S7  | "DIAPH1,LOC | 3.87E-07 | 1        | 2.62E-04    | 2.08E-11 | 8.49E-04 | 7.34E-08 |
| phe.Fasting_ | rs112940854 S5 | MYO1B | rs142789100 S8  | DIAPH1      | 1.25E-07 | 1        | 9.30E-05    | 5.32E-12 | 2.16E-04 | 2.09E-08 |
| phe.Fasting_ | rs112940854 S5 | MYO1B | rs142812798 S7  | DIAPH1      | 1.25E-07 | 1        | 9.30E-05    | 5.32E-12 | 2.16E-04 | 2.09E-08 |
| phe.Fasting_ | rs112940854 S5 | MYO1B | rs143377827 S13 | "DIAPH1,LOC | 1.07E-07 | 1        | 8.10E-05    | 4.01E-12 | 1.63E-04 | 1.65E-08 |
| phe.Fasting_ | rs112940854 S5 | MYO1B | rs143691978 S11 | DIAPH1      | 1.25E-07 | 1        | 9.30E-05    | 5.68E-12 | 2.31E-04 | 2.22E-08 |
| phe.Fasting_ | rs112940854 S5 | MYO1B | rs144081334 S11 | DIAPH1      | 1.25E-07 | 1        | 9.30E-05    | 5.68E-12 | 2.31E-04 | 2.22E-08 |
| phe.Fasting_ | rs112940854 S5 | MYO1B | rs144613910 S8  | DIAPH1      | 3.87E-07 | 1        | 0.000261569 | 2.08E-11 | 8.49E-04 | 7.34E-08 |
| phe.Fasting_ | rs112940854 S5 | MYO1B | rs145027704 S11 | DIAPH1      | 1.25E-07 | 1.00E+00 | 9.30E-05    | 5.68E-12 | 2.31E-04 | 2.22E-08 |
| phe.Fasting_ | rs112940854 S5 | MYO1B | rs146220673 S7  | DIAPH1      | 3.87E-07 | 1.00E+00 | 2.62E-04    | 2.08E-11 | 8.49E-04 | 7.34E-08 |
| phe.Fasting_ | rs112940854 S5 | MYO1B | rs146622060 S13 | DIAPH1      | 1.25E-07 | 1.00E+00 | 9.30E-05    | 5.68E-12 | 2.31E-04 | 2.22E-08 |
| phe.Fasting_ | rs112940854 S5 | MYO1B | rs146815317 S5  | KPNA3       | 3.32E-15 | 1.36E-07 | 9.02E-12    | 4.30E-06 | 1.00E+00 | 4.02E-03 |
| phe.Fasting_ | rs112940854 S5 | MYO1B | rs146878162 S7  | DIAPH1      | 3.87E-07 | 1        | 2.62E-04    | 2.08E-11 | 8.49E-04 | 7.34E-08 |
| phe.Fasting_ | rs112940854 S5 | MYO1B | rs147314451 S8  | DIAPH1      | 3.87E-07 | 1        | 2.62E-04    | 2.08E-11 | 8.49E-04 | 7.34E-08 |
| phe.Fasting_ | rs112940854 S5 | MYO1B | rs147417996 S7  | DIAPH1      | 1.25E-07 | 1        | 9.30E-05    | 5.68E-12 | 2.31E-04 | 2.22E-08 |
| phe.Fasting_ | rs112940854 S5 | MYO1B | rs147506725 S21 | "PCDHGA1,PI | 4.63E-06 | 1        | 0.00232586  | 9.97E-12 | 4.06E-04 | 3.69E-08 |
| phe.Fasting_ | rs112940854 S5 | MYO1B | rs147646948 S7  | "LOC1005056 | 3.87E-07 | 1        | 0.000261569 | 2.08E-11 | 8.49E-04 | 7.34E-08 |
| phe.Fasting_ | rs112940854 S5 | MYO1B | rs147677041 S8  | DIAPH1      | 1.25E-07 | 1.00E+00 | 9.30E-05    | 5.32E-12 | 2.16E-04 | 2.09E-08 |
| phe.Fasting_ | rs112940854 S5 | MYO1B | rs148116628 S7  | DIAPH1      | 3.87E-07 | 1.00E+00 | 2.62E-04    | 2.08E-11 | 8.49E-04 | 7.34E-08 |
| phe.Fasting_ | rs112940854 S5 | MYO1B | rs148423011 S7  | DIAPH1      | 3.87E-07 | 1        | 0.000261569 | 2.08E-11 | 8.49E-04 | 7.34E-08 |
| phe.Fasting_ | rs112940854 S5 | MYO1B | rs149019627 S8  | DIAPH1      | 1.25E-07 | 1        | 9.30E-05    | 5.32E-12 | 2.16E-04 | 2.09E-08 |
| phe.Fasting_ | rs112940854 S5 | MYO1B | rs149075406 S8  | DIAPH1      | 3.87E-07 | 1        | 0.000261569 | 2.08E-11 | 8.49E-04 | 7.34E-08 |

|              |             |    |       |             |     |             |          |          |             |          |          |          |
|--------------|-------------|----|-------|-------------|-----|-------------|----------|----------|-------------|----------|----------|----------|
| phe.Fasting_ | rs112940854 | S5 | MYO1B | rs149334783 | S8  | DIAPH1      | 3.87E-07 | 1        | 0.000261569 | 2.08E-11 | 8.49E-04 | 7.34E-08 |
| phe.Fasting_ | rs112940854 | S5 | MYO1B | rs149553852 | S21 | "PCDHGA10,  | 4.63E-06 | 1        | 0.00232586  | 9.97E-12 | 4.06E-04 | 3.69E-08 |
| phe.Fasting_ | rs112940854 | S5 | MYO1B | rs149716949 | S5  | DIAPH1      | 5.22E-08 | 1        | 4.26E-05    | 2.22E-12 | 9.04E-05 | 9.59E-09 |
| phe.Fasting_ | rs112940854 | S5 | MYO1B | rs149791570 | S5  | DIAPH1      | 1.25E-07 | 1        | 9.30E-05    | 5.32E-12 | 2.16E-04 | 2.09E-08 |
| phe.Fasting_ | rs112940854 | S5 | MYO1B | rs150117838 | S8  | KPNA3       | 3.32E-15 | 1.36E-07 | 9.02E-12    | 4.29E-06 | 1.00E+00 | 4.01E-03 |
| phe.Fasting_ | rs112940854 | S5 | MYO1B | rs150452206 | S13 | "DIAPH1,LOC | 3.87E-07 | 1        | 0.000261569 | 2.08E-11 | 8.49E-04 | 7.34E-08 |
| phe.Fasting_ | rs112940854 | S5 | MYO1B | rs150675915 | S7  | DIAPH1      | 3.87E-07 | 1        | 0.000261569 | 2.08E-11 | 8.49E-04 | 7.34E-08 |
| phe.Fasting_ | rs112940854 | S5 | MYO1B | rs150765570 | S7  | DIAPH1      | 3.87E-07 | 1        | 0.000261569 | 2.08E-11 | 8.49E-04 | 7.34E-08 |
| phe.Fasting_ | rs112940854 | S5 | MYO1B | rs150992994 | S11 | "PCDHGA5,Pi | 4.05E-07 | 1        | 0.000271703 | 2.00E-11 | 8.14E-04 | 7.09E-08 |
| phe.Fasting_ | rs112940854 | S5 | MYO1B | rs151204700 | S8  | DIAPH1      | 3.87E-07 | 1        | 0.000261569 | 2.08E-11 | 8.49E-04 | 7.34E-08 |
| phe.Fasting_ | rs112940854 | S5 | MYO1B | rs151330468 | S8  | DIAPH1      | 1.25E-07 | 1        | 9.30E-05    | 5.68E-12 | 2.31E-04 | 2.22E-08 |
| phe.Fasting_ | rs112940854 | S5 | MYO1B | rs16854875  | S2  | NA          | 5.88E-07 | 1        | 0.000379667 | 5.96E-08 | 1.00E+00 | 9.00E-05 |
| phe.Fasting_ | rs112940854 | S5 | MYO1B | rs17236830  | S6  | PHC3        | 1.28E-06 | 1        | 0.000757024 | 7.99E-11 | 3.25E-03 | 2.49E-07 |
| phe.Fasting_ | rs112940854 | S5 | MYO1B | rs180772028 | S8  | "DIAPH1,LOC | 3.87E-07 | 1        | 0.000261569 | 2.08E-11 | 8.49E-04 | 7.34E-08 |
| phe.Fasting_ | rs112940854 | S5 | MYO1B | rs181224861 | S7  | DIAPH1      | 3.87E-07 | 1        | 0.000261569 | 2.08E-11 | 8.49E-04 | 7.34E-08 |
| phe.Fasting_ | rs112940854 | S5 | MYO1B | rs181247960 | S21 | "PCDHGA9,Pi | 4.63E-06 | 1        | 0.00232586  | 9.97E-12 | 4.06E-04 | 3.69E-08 |
| phe.Fasting_ | rs112940854 | S5 | MYO1B | rs181824655 | S21 | "PCDHGB6,Pi | 4.63E-06 | 1        | 0.00232586  | 9.97E-12 | 4.06E-04 | 3.69E-08 |
| phe.Fasting_ | rs112940854 | S5 | MYO1B | rs182714699 | S8  | DIAPH1      | 3.87E-07 | 1.00E+00 | 2.62E-04    | 2.08E-11 | 8.49E-04 | 7.34E-08 |
| phe.Fasting_ | rs112940854 | S5 | MYO1B | rs182958142 | S8  | DIAPH1      | 6.31E-07 | 1        | 0.000403696 | 2.06E-12 | 8.40E-05 | 8.98E-09 |
| phe.Fasting_ | rs112940854 | S5 | MYO1B | rs182965141 | S8  | DIAPH1      | 1.36E-07 | 1        | 0.000100007 | 1.58E-09 | 6.44E-02 | 3.58E-06 |
| phe.Fasting_ | rs112940854 | S5 | MYO1B | rs183597049 | S7  | DIAPH1      | 3.87E-07 | 1        | 0.000261569 | 2.08E-11 | 8.49E-04 | 7.34E-08 |
| phe.Fasting_ | rs112940854 | S5 | MYO1B | rs183980988 | S2  | NA          | 3.87E-07 | 1        | 0.000261569 | 2.08E-11 | 8.49E-04 | 7.34E-08 |
| phe.Fasting_ | rs112940854 | S5 | MYO1B | rs184233232 | S7  | DIAPH1      | 3.87E-07 | 1        | 0.000261569 | 2.08E-11 | 8.49E-04 | 7.34E-08 |
| phe.Fasting_ | rs112940854 | S5 | MYO1B | rs184509477 | S13 | "PCDHGB4,Pi | 3.87E-07 | 1        | 0.000261569 | 2.08E-11 | 8.49E-04 | 7.34E-08 |
| phe.Fasting_ | rs112940854 | S5 | MYO1B | rs185069296 | S15 | "LOC100505  | 3.87E-07 | 1        | 0.000261569 | 2.08E-11 | 8.49E-04 | 7.34E-08 |
| phe.Fasting_ | rs112940854 | S5 | MYO1B | rs185502834 | S8  | DIAPH1      | 1.25E-07 | 1        | 9.30E-05    | 5.32E-12 | 2.16E-04 | 2.09E-08 |
| phe.Fasting_ | rs112940854 | S5 | MYO1B | rs185759881 | S7  | DIAPH1      | 3.87E-07 | 1        | 2.62E-04    | 2.08E-11 | 8.49E-04 | 7.34E-08 |
| phe.Fasting_ | rs112940854 | S5 | MYO1B | rs186288044 | S21 | "PCDHGB4,Pi | 4.63E-06 | 1.00E+00 | 2.33E-03    | 9.97E-12 | 4.06E-04 | 3.69E-08 |
| phe.Fasting_ | rs112940854 | S5 | MYO1B | rs187000011 | S11 | DIAPH1      | 3.87E-07 | 1.00E+00 | 2.62E-04    | 2.08E-11 | 8.49E-04 | 7.34E-08 |
| phe.Fasting_ | rs112940854 | S5 | MYO1B | rs188981295 | S5  | "RPS27AP10, | 3.87E-07 | 1.00E+00 | 2.62E-04    | 2.08E-11 | 8.49E-04 | 7.34E-08 |
| phe.Fasting_ | rs112940854 | S5 | MYO1B | rs190559574 | S7  | DIAPH1      | 1.25E-07 | 1.00E+00 | 9.30E-05    | 5.32E-12 | 2.16E-04 | 2.09E-08 |
| phe.Fasting_ | rs112940854 | S5 | MYO1B | rs191544043 | S8  | DIAPH1      | 3.87E-07 | 1        | 0.000261569 | 2.08E-11 | 8.49E-04 | 7.34E-08 |
| phe.Fasting_ | rs112940854 | S5 | MYO1B | rs191766712 | S7  | DIAPH1      | 3.87E-07 | 1        | 0.000261569 | 2.08E-11 | 8.49E-04 | 7.34E-08 |
| phe.Fasting_ | rs112940854 | S5 | MYO1B | rs192690040 | S7  | DIAPH1      | 3.87E-07 | 1        | 0.000261569 | 2.08E-11 | 8.49E-04 | 7.34E-08 |
| phe.Fasting_ | rs112940854 | S5 | MYO1B | rs192765219 | S7  | DIAPH1      | 3.87E-07 | 1.00E+00 | 2.62E-04    | 2.08E-11 | 8.49E-04 | 7.34E-08 |
| phe.Fasting_ | rs112940854 | S5 | MYO1B | rs192770525 | S7  | DIAPH1      | 3.87E-07 | 1.00E+00 | 2.62E-04    | 2.08E-11 | 8.49E-04 | 7.34E-08 |
| phe.Fasting_ | rs112940854 | S5 | MYO1B | rs2241292   | S8  | GPR160      | 7.71E-07 | 1.00E+00 | 4.81E-04    | 1.00E-10 | 4.08E-03 | 3.06E-07 |
| phe.Fasting_ | rs112940854 | S5 | MYO1B | rs35990401  | S7  | DIAPH1      | 4.16E-07 | 1        | 2.78E-04    | 7.14E-12 | 2.91E-04 | 2.74E-08 |
| phe.Fasting_ | rs112940854 | S5 | MYO1B | rs3772186   | S6  | PHC3        | 7.51E-07 | 1        | 4.70E-04    | 6.19E-11 | 2.52E-03 | 1.97E-07 |
| phe.Fasting_ | rs112940854 | S5 | MYO1B | rs55900860  | S7  | DIAPH1      | 1.25E-07 | 1        | 9.30E-05    | 5.32E-12 | 2.16E-04 | 2.09E-08 |

|                           |        |             |     |             |          |            |             |          |          |          |
|---------------------------|--------|-------------|-----|-------------|----------|------------|-------------|----------|----------|----------|
| phe.Fasting_rs112940854S5 | MYO1B  | rs57287019  | S5  | CLCN3       | 3.46E-11 | 0.00141227 | 4.84E-08    | 1.15E-05 | 1.00E+00 | 9.11E-03 |
| phe.Fasting_rs112940854S5 | MYO1B  | rs57503635  | S3  | NA          | 5.73E-07 | 1          | 0.000371124 | 2.25E-06 | 1.00E+00 | 2.29E-03 |
| phe.Fasting_rs112940854S5 | MYO1B  | rs58417766  | S7  | PHC3        | 7.51E-07 | 1          | 0.000470352 | 6.19E-11 | 2.52E-03 | 1.97E-07 |
| phe.Fasting_rs112940854S5 | MYO1B  | rs6763396   | S5  | PHC3        | 8.07E-07 | 1          | 0.000501984 | 6.36E-11 | 2.59E-03 | 2.01E-07 |
| phe.Fasting_rs112940854S5 | MYO1B  | rs6781454   | S8  | PHC3        | 7.65E-07 | 1          | 0.000478609 | 6.30E-11 | 2.56E-03 | 2.00E-07 |
| phe.Fasting_rs112940854S5 | MYO1B  | rs6786022   | S8  | PHC3        | 1.23E-06 | 1          | 0.000729317 | 7.72E-11 | 3.14E-03 | 2.41E-07 |
| phe.Fasting_rs112940854S5 | MYO1B  | rs6808506   | S7  | PHC3        | 7.51E-07 | 1          | 0.000470352 | 6.19E-11 | 2.52E-03 | 1.97E-07 |
| phe.Fasting_rs112940854S5 | MYO1B  | rs6881310   | S23 | ISL1        | 5.93E-16 | 2.42E-08   | 1.84E-12    | 5.44E-12 | 2.21E-04 | 2.14E-08 |
| phe.Fasting_rs112940854S5 | MYO1B  | rs7256517   | S7  | CYTH2       | 1.84E-05 | 1.00E+00   | 7.75E-03    | 4.01E-06 | 1.00E+00 | 3.78E-03 |
| phe.Fasting_rs112940854S5 | MYO1B  | rs73619637  | S8  | NA          | 8.20E-07 | 1.00E+00   | 5.08E-04    | 2.37E-15 | 9.64E-08 | 2.33E-11 |
| phe.Fasting_rs112940854S5 | MYO1B  | rs73879173  | S8  | PHC3        | 7.51E-07 | 1.00E+00   | 4.70E-04    | 6.19E-11 | 2.52E-03 | 1.97E-07 |
| phe.Fasting_rs112940854S5 | MYO1B  | rs73879178  | S10 | PHC3        | 1.23E-06 | 1.00E+00   | 7.29E-04    | 7.72E-11 | 3.14E-03 | 2.41E-07 |
| phe.Fasting_rs112940854S5 | MYO1B  | rs73879182  | S6  | PHC3        | 7.51E-07 | 1.00E+00   | 4.70E-04    | 6.19E-11 | 2.52E-03 | 1.97E-07 |
| phe.Fasting_rs112940854S5 | MYO1B  | rs74627895  | S8  | TMEM64      | 7.39E-08 | 1.00E+00   | 5.81E-05    | 1.27E-05 | 1.00E+00 | 9.83E-03 |
| phe.Fasting_rs112940854S5 | MYO1B  | rs75350765  | S5  | RCL1        | 3.95E-16 | 1.61E-08   | 1.28E-12    | 1.01E-05 | 1.00E+00 | 8.25E-03 |
| phe.Fasting_rs112940854S5 | MYO1B  | rs75758702  | S24 | NA          | 7.83E-17 | 3.20E-09   | 3.47E-13    | 1.29E-11 | 5.25E-04 | 4.72E-08 |
| phe.Fasting_rs112940854S5 | MYO1B  | rs76146702  | S5  | PHC3        | 8.11E-07 | 1.00E+00   | 5.04E-04    | 3.45E-11 | 1.40E-03 | 1.15E-07 |
| phe.Fasting_rs112940854S5 | MYO1B  | rs7615039   | S8  | PHC3        | 6.80E-07 | 1.00E+00   | 4.32E-04    | 9.63E-11 | 3.92E-03 | 2.95E-07 |
| phe.Fasting_rs112940854S5 | MYO1B  | rs7638400   | S7  | PHC3        | 7.51E-07 | 1.00E+00   | 4.70E-04    | 6.19E-11 | 2.52E-03 | 1.97E-07 |
| phe.Fasting_rs112940854S5 | MYO1B  | rs76737663  | S1  | LOC654841   | 1.29E-15 | 5.25E-08   | 3.74E-12    | 2.23E-09 | 9.08E-02 | 4.87E-06 |
| phe.Fasting_rs112940854S5 | MYO1B  | rs77444916  | S23 | LOC642366   | 2.06E-16 | 8.39E-09   | 7.10E-13    | 1.23E-14 | 5.00E-07 | 1.05E-10 |
| phe.Fasting_rs112940854S5 | MYO1B  | rs77798597  | S7  | KPNA3       | 3.32E-15 | 1.36E-07   | 9.02E-12    | 4.29E-06 | 1.00E+00 | 4.01E-03 |
| phe.Fasting_rs112940854S5 | MYO1B  | rs78516788  | S8  | SLC38A1     | 6.09E-06 | 1.00E+00   | 2.96E-03    | 1.58E-15 | 6.43E-08 | 1.76E-11 |
| phe.Fasting_rs112940854S5 | MYO1B  | rs78736524  | S5  | KPNA3       | 3.32E-15 | 1.36E-07   | 9.02E-12    | 4.30E-06 | 1.00E+00 | 4.02E-03 |
| phe.Fasting_rs112940854S5 | MYO1B  | rs79389383  | S8  | PHC3        | 7.65E-07 | 1.00E+00   | 4.79E-04    | 6.30E-11 | 2.56E-03 | 2.00E-07 |
| phe.Fasting_rs112940854S5 | MYO1B  | rs79517926  | S15 | "DIAPH1,LOC | 1.64E-07 | 1.00E+00   | 1.18E-04    | 1.72E-12 | 6.99E-05 | 7.56E-09 |
| phe.Fasting_rs112940854S5 | MYO1B  | rs79518241  | S6  | PHC3        | 7.51E-07 | 1          | 4.70E-04    | 6.19E-11 | 2.52E-03 | 1.97E-07 |
| phe.Fasting_rs112940854S5 | MYO1B  | rs79781495  | S8  | KPNA3       | 3.32E-15 | 1.36E-07   | 9.02E-12    | 4.29E-06 | 1.00E+00 | 4.01E-03 |
| phe.Fasting_rs112940854S5 | MYO1B  | rs80258830  | S24 | LOC642366   | 2.06E-16 | 8.39E-09   | 7.10E-13    | 1.23E-14 | 5.00E-07 | 1.05E-10 |
| phe.Fasting_rs112940854S5 | MYO1B  | rs80332465  | S5  | KPNA3       | 3.53E-15 | 1.44E-07   | 9.50E-12    | 4.45E-06 | 1.00E+00 | 4.14E-03 |
| phe.Fasting_rs112940854S5 | MYO1B  | rs80334773  | S5  | KPNA3       | 3.53E-15 | 1.44E-07   | 9.50E-12    | 4.45E-06 | 1.00E+00 | 4.14E-03 |
| phe.Fasting_rs113219478S7 | DIAPH1 | rs111576333 | S5  | TMEM64      | 2.37E-06 | 1.00E+00   | 1.30E-03    | 5.87E-14 | 2.39E-06 | 3.99E-10 |
| phe.Fasting_rs113219478S7 | DIAPH1 | rs112089881 | S8  | ZFAND4      | 2.04E-17 | 8.32E-10   | 1.43E-13    | 1.09E-09 | 4.45E-02 | 2.58E-06 |
| phe.Fasting_rs113219478S7 | DIAPH1 | rs112091318 | S5  | TMEM64      | 7.32E-07 | 1.00E+00   | 4.60E-04    | 3.91E-08 | 1.00E+00 | 6.13E-05 |
| phe.Fasting_rs113219478S7 | DIAPH1 | rs114334325 | S7  | AP3M2       | 4.51E-15 | 1.84E-07   | 1.18E-11    | 3.87E-07 | 1.00E+00 | 4.75E-04 |
| phe.Fasting_rs113219478S7 | DIAPH1 | rs114394395 | S7  | AP3M2       | 4.81E-15 | 1.97E-07   | 1.25E-11    | 3.87E-07 | 1.00E+00 | 4.75E-04 |
| phe.Fasting_rs113219478S7 | DIAPH1 | rs114565620 | S8  | RCL1        | 1.82E-16 | 7.42E-09   | 6.37E-13    | 3.70E-08 | 1.00E+00 | 5.84E-05 |
| phe.Fasting_rs113219478S7 | DIAPH1 | rs115083290 | S19 | NA          | 4.38E-16 | 1.79E-08   | 1.40E-12    | 1.42E-08 | 5.77E-01 | 2.53E-05 |
| phe.Fasting_rs113219478S7 | DIAPH1 | rs11524145  | S5  | CDK6        | 7.80E-07 | 1.00E+00   | 4.86E-04    | 7.89E-06 | 1.00E+00 | 6.69E-03 |
| phe.Fasting_rs113219478S7 | DIAPH1 | rs115752779 | S19 | NA          | 4.38E-16 | 1.79E-08   | 1.40E-12    | 1.42E-08 | 5.77E-01 | 2.53E-05 |

|              |                |        |                |           |          |             |            |          |          |          |
|--------------|----------------|--------|----------------|-----------|----------|-------------|------------|----------|----------|----------|
| phe.Fasting_ | rs113219478 S7 | DIAPH1 | rs115787552 S5 | KPNA3     | 2.97E-15 | 1.21E-07    | 8.14E-12   | 1.18E-13 | 4.80E-06 | 7.06E-10 |
| phe.Fasting_ | rs113219478 S7 | DIAPH1 | rs115888477 S8 | NA        | 2.03E-14 | 8.28E-07    | 5.02E-11   | 2.21E-14 | 8.99E-07 | 1.73E-10 |
| phe.Fasting_ | rs113219478 S7 | DIAPH1 | rs116011837 S9 | BRD2      | 4.89E-11 | 0.00199774  | 6.62E-08   | 4.07E-14 | 1.66E-06 | 2.85E-10 |
| phe.Fasting_ | rs113219478 S7 | DIAPH1 | rs116079984 S8 | KPNA3     | 2.97E-15 | 1.21E-07    | 8.14E-12   | 1.24E-13 | 5.04E-06 | 7.34E-10 |
| phe.Fasting_ | rs113219478 S7 | DIAPH1 | rs116120727 S9 | BRD2      | 4.89E-11 | 2.00E-03    | 6.62E-08   | 4.07E-14 | 1.66E-06 | 2.85E-10 |
| phe.Fasting_ | rs113219478 S7 | DIAPH1 | rs116406581 S2 | NA        | 1.81E-14 | 7.39E-07    | 4.52E-11   | 2.35E-07 | 1.00E+00 | 3.05E-04 |
| phe.Fasting_ | rs113219478 S7 | DIAPH1 | rs116548615 S8 | TMEM45B   | 1.73E-16 | 7.06E-09    | 6.15E-13   | 8.70E-12 | 3.54E-04 | 3.26E-08 |
| phe.Fasting_ | rs113219478 S7 | DIAPH1 | rs116696844 S3 | AP3M2     | 6.92E-15 | 2.83E-07    | 1.78E-11   | 3.87E-07 | 1.00E+00 | 4.75E-04 |
| phe.Fasting_ | rs113219478 S7 | DIAPH1 | rs11989304 S4  | TMEM64    | 2.37E-06 | 1           | 0.00129547 | 6.78E-11 | 2.76E-03 | 2.13E-07 |
| phe.Fasting_ | rs113219478 S7 | DIAPH1 | rs140524622 S7 | MRPL10    | 1.08E-16 | 4.41E-09    | 4.54E-13   | 7.35E-06 | 1.00E+00 | 6.31E-03 |
| phe.Fasting_ | rs113219478 S7 | DIAPH1 | rs146815317 S5 | KPNA3     | 2.97E-15 | 1.21E-07    | 8.14E-12   | 1.18E-13 | 4.80E-06 | 7.06E-10 |
| phe.Fasting_ | rs113219478 S7 | DIAPH1 | rs150117838 S8 | KPNA3     | 2.97E-15 | 1.21E-07    | 8.14E-12   | 1.09E-13 | 4.44E-06 | 6.79E-10 |
| phe.Fasting_ | rs113219478 S7 | DIAPH1 | rs150916187 S4 | HIST1H2BK | 1.38E-05 | 1.00E+00    | 6.05E-03   | 1.37E-14 | 5.59E-07 | 1.16E-10 |
| phe.Fasting_ | rs113219478 S7 | DIAPH1 | rs16894241 S4  | HIST1H2BK | 1.99E-11 | 8.12E-04    | 2.96E-08   | 3.44E-14 | 1.40E-06 | 2.50E-10 |
| phe.Fasting_ | rs113219478 S7 | DIAPH1 | rs2032062 S8   | NA        | 1.22E-14 | 4.98E-07    | 3.09E-11   | 8.48E-06 | 1.00E+00 | 7.14E-03 |
| phe.Fasting_ | rs113219478 S7 | DIAPH1 | rs2153597 S8   | ZNF438    | 5.51E-11 | 2.25E-03    | 7.42E-08   | 4.52E-09 | 1.84E-01 | 9.08E-06 |
| phe.Fasting_ | rs113219478 S7 | DIAPH1 | rs2835656 S7   | TTC3      | 3.01E-10 | 0.0122766   | 3.60E-07   | 9.12E-06 | 1.00E+00 | 7.57E-03 |
| phe.Fasting_ | rs113219478 S7 | DIAPH1 | rs34801978 S3  | HOXB2     | 1.23E-05 | 1           | 5.46E-03   | 1.03E-08 | 4.19E-01 | 1.90E-05 |
| phe.Fasting_ | rs113219478 S7 | DIAPH1 | rs352346 S3    | GRPEL2    | 1.85E-11 | 0.000754995 | 2.78E-08   | 8.42E-06 | 1.00E+00 | 7.10E-03 |
| phe.Fasting_ | rs113219478 S7 | DIAPH1 | rs3750898 S8   | DCLRE1A   | 2.29E-05 | 1           | 9.35E-03   | 8.76E-06 | 1.00E+00 | 7.32E-03 |
| phe.Fasting_ | rs113219478 S7 | DIAPH1 | rs4732511 S13  | POR       | 2.30E-15 | 9.39E-08    | 6.48E-12   | 9.65E-06 | 1.00E+00 | 7.93E-03 |
| phe.Fasting_ | rs113219478 S7 | DIAPH1 | rs57503635 S3  | NA        | 6.34E-16 | 2.59E-08    | 1.95E-12   | 3.17E-14 | 1.29E-06 | 2.34E-10 |
| phe.Fasting_ | rs113219478 S7 | DIAPH1 | rs58905476 S7  | TTC3      | 3.29E-10 | 0.0134302   | 3.90E-07   | 9.79E-06 | 1.00E+00 | 8.01E-03 |
| phe.Fasting_ | rs113219478 S7 | DIAPH1 | rs60011869 S16 | NA        | 1.04E-05 | 1           | 4.72E-03   | 8.16E-10 | 3.32E-02 | 1.98E-06 |
| phe.Fasting_ | rs113219478 S7 | DIAPH1 | rs6964407 S7   | POR       | 7.55E-15 | 3.08E-07    | 1.94E-11   | 8.91E-06 | 1.00E+00 | 7.43E-03 |
| phe.Fasting_ | rs113219478 S7 | DIAPH1 | rs7004597 S8   | NA        | 4.51E-15 | 1.84E-07    | 1.18E-11   | 2.34E-07 | 1.00E+00 | 3.04E-04 |
| phe.Fasting_ | rs113219478 S7 | DIAPH1 | rs7256517 S7   | CYTH2     | 1.04E-15 | 4.24E-08    | 3.06E-12   | 4.82E-12 | 1.96E-04 | 1.91E-08 |
| phe.Fasting_ | rs113219478 S7 | DIAPH1 | rs73283603 S7  | ZWINT     | 1.90E-06 | 1.00E+00    | 1.07E-03   | 2.03E-07 | 1.00E+00 | 2.68E-04 |
| phe.Fasting_ | rs113219478 S7 | DIAPH1 | rs73392640 S8  | POLR3B    | 2.02E-10 | 0.00826001  | 2.49E-07   | 5.19E-11 | 2.11E-03 | 1.67E-07 |
| phe.Fasting_ | rs113219478 S7 | DIAPH1 | rs734069 S19   | NA        | 2.06E-08 | 0.839421    | 1.81E-05   | 6.71E-10 | 2.73E-02 | 1.68E-06 |
| phe.Fasting_ | rs113219478 S7 | DIAPH1 | rs73619637 S8  | NA        | 1.44E-15 | 5.89E-08    | 4.14E-12   | 2.05E-10 | 8.34E-03 | 5.78E-07 |
| phe.Fasting_ | rs113219478 S7 | DIAPH1 | rs74627895 S8  | TMEM64    | 7.32E-07 | 1           | 4.60E-04   | 2.03E-08 | 8.28E-01 | 3.48E-05 |
| phe.Fasting_ | rs113219478 S7 | DIAPH1 | rs74914207 S24 | NA        | 1.37E-10 | 0.00558626  | 1.73E-07   | 9.12E-11 | 3.71E-03 | 2.80E-07 |
| phe.Fasting_ | rs113219478 S7 | DIAPH1 | rs75350765 S5  | RCL1      | 1.82E-16 | 7.42E-09    | 6.37E-13   | 3.70E-08 | 1.00E+00 | 5.84E-05 |
| phe.Fasting_ | rs113219478 S7 | DIAPH1 | rs75374128 S5  | CNTLN     | 1.47E-16 | 6.01E-09    | 5.72E-13   | 1.01E-07 | 1.00E+00 | 1.42E-04 |
| phe.Fasting_ | rs113219478 S7 | DIAPH1 | rs75506779 S5  | TMCO3     | 5.55E-07 | 1.00E+00    | 3.61E-04   | 1.10E-08 | 4.50E-01 | 2.03E-05 |
| phe.Fasting_ | rs113219478 S7 | DIAPH1 | rs75758702 S24 | NA        | 7.02E-17 | 2.87E-09    | 3.16E-13   | 1.57E-10 | 6.38E-03 | 4.59E-07 |
| phe.Fasting_ | rs113219478 S7 | DIAPH1 | rs75864203 S8  | CNTLN     | 1.47E-16 | 6.01E-09    | 5.72E-13   | 1.01E-07 | 1.00E+00 | 1.42E-04 |
| phe.Fasting_ | rs113219478 S7 | DIAPH1 | rs75949566 S5  | TMEM64    | 2.76E-06 | 1.00E+00    | 1.47E-03   | 8.48E-11 | 3.45E-03 | 2.62E-07 |
| phe.Fasting_ | rs113219478 S7 | DIAPH1 | rs76844308 S8  | CNTLN     | 7.68E-17 | 3.14E-09    | 3.41E-13   | 9.52E-08 | 1.00E+00 | 1.35E-04 |

|              |                |        |             |     |             |          |             |             |          |          |          |
|--------------|----------------|--------|-------------|-----|-------------|----------|-------------|-------------|----------|----------|----------|
| phe.Fasting_ | rs113219478S7  | DIAPH1 | rs7763107   | S8  | FARS2       | 5.78E-16 | 2.36E-08    | 1.79E-12    | 9.23E-12 | 3.76E-04 | 3.44E-08 |
| phe.Fasting_ | rs113219478S7  | DIAPH1 | rs77798597  | S7  | KPNA3       | 2.97E-15 | 1.21E-07    | 8.14E-12    | 1.09E-13 | 4.44E-06 | 6.79E-10 |
| phe.Fasting_ | rs113219478S7  | DIAPH1 | rs77845645  | S21 | NA          | 1.53E-06 | 1.00E+00    | 8.88E-04    | 4.20E-11 | 1.71E-03 | 1.38E-07 |
| phe.Fasting_ | rs113219478S7  | DIAPH1 | rs78353402  | S8  | AP3M2       | 4.51E-15 | 1.84E-07    | 1.18E-11    | 3.87E-07 | 1.00E+00 | 4.75E-04 |
| phe.Fasting_ | rs113219478S7  | DIAPH1 | rs78516788  | S8  | SLC38A1     | 2.75E-11 | 1.12E-03    | 3.94E-08    | 2.44E-10 | 9.93E-03 | 6.74E-07 |
| phe.Fasting_ | rs113219478S7  | DIAPH1 | rs78697063  | S5  | MSI2        | 8.23E-19 | 3.36E-11    | 2.70E-14    | 6.84E-10 | 2.78E-02 | 1.70E-06 |
| phe.Fasting_ | rs113219478S7  | DIAPH1 | rs78722272  | S5  | CNTLN       | 1.47E-16 | 6.01E-09    | 5.72E-13    | 1.05E-07 | 1.00E+00 | 1.48E-04 |
| phe.Fasting_ | rs113219478S7  | DIAPH1 | rs78736524  | S5  | KPNA3       | 2.97E-15 | 1.21E-07    | 8.14E-12    | 1.18E-13 | 4.80E-06 | 7.06E-10 |
| phe.Fasting_ | rs113219478S7  | DIAPH1 | rs78990344  | S2  | LOC10050631 | 2.37E-06 | 1           | 1.30E-03    | 6.78E-11 | 2.76E-03 | 2.13E-07 |
| phe.Fasting_ | rs113219478S7  | DIAPH1 | rs79781495  | S8  | KPNA3       | 2.97E-15 | 1.21E-07    | 8.14E-12    | 1.09E-13 | 4.44E-06 | 6.79E-10 |
| phe.Fasting_ | rs113219478S7  | DIAPH1 | rs79886603  | S15 | NA          | 8.71E-08 | 1           | 6.74E-05    | 4.66E-07 | 1.00E+00 | 5.59E-04 |
| phe.Fasting_ | rs113219478S7  | DIAPH1 | rs80200953  | S8  | PPP2R5D     | 8.49E-17 | 3.47E-09    | 3.69E-13    | 3.65E-09 | 1.48E-01 | 7.55E-06 |
| phe.Fasting_ | rs113219478S7  | DIAPH1 | rs80332465  | S5  | KPNA3       | 3.13E-15 | 1.28E-07    | 8.51E-12    | 1.17E-13 | 4.77E-06 | 7.06E-10 |
| phe.Fasting_ | rs113219478S7  | DIAPH1 | rs80334773  | S5  | KPNA3       | 3.13E-15 | 1.28E-07    | 8.51E-12    | 1.17E-13 | 4.77E-06 | 7.06E-10 |
| phe.Fasting_ | rs113357907S24 | ISL1   | rs111576333 | S5  | TMEM64      | 1.53E-17 | 6.25E-10    | 1.19E-13    | 7.14E-15 | 2.91E-07 | 6.37E-11 |
| phe.Fasting_ | rs113357907S24 | ISL1   | rs112027720 | S7  | DIAPH1      | 2.93E-06 | 1           | 1.55E-03    | 1.36E-13 | 5.54E-06 | 7.87E-10 |
| phe.Fasting_ | rs113357907S24 | ISL1   | rs112089881 | S8  | ZFAND4      | 2.87E-08 | 1           | 2.46E-05    | 3.17E-16 | 1.29E-08 | 1.05E-11 |
| phe.Fasting_ | rs113357907S24 | ISL1   | rs112091318 | S5  | TMEM64      | 4.64E-18 | 1.89E-10    | 6.53E-14    | 8.48E-15 | 3.45E-07 | 7.46E-11 |
| phe.Fasting_ | rs113357907S24 | ISL1   | rs113219478 | S7  | DIAPH1      | 2.93E-06 | 1           | 1.55E-03    | 1.36E-13 | 5.54E-06 | 7.87E-10 |
| phe.Fasting_ | rs113357907S24 | ISL1   | rs113568654 | S12 | SPTLC1      | 5.91E-08 | 1           | 4.76E-05    | 1.54E-13 | 6.25E-06 | 8.72E-10 |
| phe.Fasting_ | rs113357907S24 | ISL1   | rs114334325 | S7  | AP3M2       | 5.53E-12 | 0.000225777 | 9.75E-09    | 5.21E-15 | 2.12E-07 | 4.77E-11 |
| phe.Fasting_ | rs113357907S24 | ISL1   | rs114394395 | S7  | AP3M2       | 5.76E-12 | 2.35E-04    | 1.01E-08    | 5.21E-15 | 2.12E-07 | 4.77E-11 |
| phe.Fasting_ | rs113357907S24 | ISL1   | rs114565620 | S8  | RCL1        | 7.60E-18 | 3.10E-10    | 8.48E-14    | 5.79E-15 | 2.36E-07 | 5.27E-11 |
| phe.Fasting_ | rs113357907S24 | ISL1   | rs115083290 | S19 | NA          | 7.33E-07 | 1           | 0.000460091 | 8.92E-16 | 3.63E-08 | 1.16E-11 |
| phe.Fasting_ | rs113357907S24 | ISL1   | rs115305957 | S23 | NA          | 6.19E-18 | 2.53E-10    | 7.56E-14    | 3.34E-15 | 1.36E-07 | 3.20E-11 |
| phe.Fasting_ | rs113357907S24 | ISL1   | rs115752779 | S19 | NA          | 7.33E-07 | 1           | 0.000460091 | 8.92E-16 | 3.63E-08 | 1.16E-11 |
| phe.Fasting_ | rs113357907S24 | ISL1   | rs115787552 | S5  | KPNA3       | 6.45E-17 | 2.64E-09    | 2.97E-13    | 3.26E-14 | 1.33E-06 | 2.39E-10 |
| phe.Fasting_ | rs113357907S24 | ISL1   | rs115888477 | S8  | NA          | 5.08E-16 | 2.08E-08    | 1.60E-12    | 5.65E-15 | 2.30E-07 | 5.16E-11 |
| phe.Fasting_ | rs113357907S24 | ISL1   | rs116011837 | S9  | BRD2        | 9.34E-18 | 3.81E-10    | 9.31E-14    | 3.16E-13 | 1.29E-05 | 1.73E-09 |
| phe.Fasting_ | rs113357907S24 | ISL1   | rs116079984 | S8  | KPNA3       | 6.45E-17 | 2.64E-09    | 2.97E-13    | 3.69E-14 | 1.50E-06 | 2.65E-10 |
| phe.Fasting_ | rs113357907S24 | ISL1   | rs116120727 | S9  | BRD2        | 9.34E-18 | 3.81E-10    | 9.31E-14    | 3.16E-13 | 1.29E-05 | 1.73E-09 |
| phe.Fasting_ | rs113357907S24 | ISL1   | rs116279995 | S20 | "PCDHGA4, P | 3.91E-07 | 1.00E+00    | 2.64E-04    | 5.50E-14 | 2.24E-06 | 3.79E-10 |
| phe.Fasting_ | rs113357907S24 | ISL1   | rs116406581 | S2  | NA          | 2.35E-11 | 9.58E-04    | 3.42E-08    | 4.16E-15 | 1.69E-07 | 3.88E-11 |
| phe.Fasting_ | rs113357907S24 | ISL1   | rs116548615 | S8  | TMEM45B     | 7.87E-18 | 3.21E-10    | 8.51E-14    | 7.19E-09 | 2.92E-01 | 1.38E-05 |
| phe.Fasting_ | rs113357907S24 | ISL1   | rs116696844 | S3  | AP3M2       | 1.27E-11 | 0.000516614 | 1.97E-08    | 5.21E-15 | 2.12E-07 | 4.77E-11 |
| phe.Fasting_ | rs113357907S24 | ISL1   | rs11989304  | S4  | TMEM64      | 1.53E-17 | 6.25E-10    | 1.19E-13    | 6.84E-15 | 2.78E-07 | 6.11E-11 |
| phe.Fasting_ | rs113357907S24 | ISL1   | rs13353823  | S8  | MAST4       | 1.27E-07 | 1.00E+00    | 9.47E-05    | 7.01E-09 | 2.85E-01 | 1.35E-05 |
| phe.Fasting_ | rs113357907S24 | ISL1   | rs138090701 | S5  | HDAC3       | 4.17E-07 | 1.00E+00    | 2.79E-04    | 1.22E-13 | 4.98E-06 | 7.30E-10 |
| phe.Fasting_ | rs113357907S24 | ISL1   | rs138136869 | S7  | DIAPH1      | 6.63E-07 | 1.00E+00    | 4.22E-04    | 3.67E-14 | 1.49E-06 | 2.64E-10 |
| phe.Fasting_ | rs113357907S24 | ISL1   | rs138457103 | S10 | DIAPH1      | 1.71E-06 | 1.00E+00    | 9.75E-04    | 1.31E-13 | 5.31E-06 | 7.62E-10 |



|              |                 |      |                 |             |          |          |             |          |          |          |
|--------------|-----------------|------|-----------------|-------------|----------|----------|-------------|----------|----------|----------|
| phe.Fasting_ | rs113357907 S24 | ISL1 | rs138487229 S11 | DIAPH1      | 2.93E-06 | 1.00E+00 | 1.55E-03    | 1.36E-13 | 5.54E-06 | 7.87E-10 |
| phe.Fasting_ | rs113357907 S24 | ISL1 | rs138738950 S8  | "PCDHGB2,Pi | 2.93E-06 | 1.00E+00 | 1.55E-03    | 1.38E-13 | 5.62E-06 | 7.93E-10 |
| phe.Fasting_ | rs113357907 S24 | ISL1 | rs139297927 S8  | DIAPH1      | 2.93E-06 | 1.00E+00 | 1.55E-03    | 1.36E-13 | 5.54E-06 | 7.87E-10 |
| phe.Fasting_ | rs113357907 S24 | ISL1 | rs139337303 S8  | DIAPH1      | 2.93E-06 | 1.00E+00 | 1.55E-03    | 1.36E-13 | 5.54E-06 | 7.87E-10 |
| phe.Fasting_ | rs113357907 S24 | ISL1 | rs139403963 S8  | DIAPH1      | 6.63E-07 | 1.00E+00 | 4.22E-04    | 3.67E-14 | 1.49E-06 | 2.64E-10 |
| phe.Fasting_ | rs113357907 S24 | ISL1 | rs139621309 S18 | "LOC1005056 | 2.93E-06 | 1        | 0.001548    | 1.36E-13 | 5.54E-06 | 7.87E-10 |
| phe.Fasting_ | rs113357907 S24 | ISL1 | rs139828110 S8  | DIAPH1      | 6.63E-07 | 1        | 0.00042181  | 3.67E-14 | 1.49E-06 | 2.64E-10 |
| phe.Fasting_ | rs113357907 S24 | ISL1 | rs140070363 S8  | DIAPH1      | 2.93E-06 | 1.00E+00 | 1.55E-03    | 1.36E-13 | 5.54E-06 | 7.87E-10 |
| phe.Fasting_ | rs113357907 S24 | ISL1 | rs140524622 S7  | MRPL10      | 1.76E-07 | 1.00E+00 | 1.27E-04    | 6.08E-15 | 2.47E-07 | 5.51E-11 |
| phe.Fasting_ | rs113357907 S24 | ISL1 | rs140644750 S13 | DIAPH1      | 2.93E-06 | 1.00E+00 | 1.55E-03    | 1.36E-13 | 5.54E-06 | 7.87E-10 |
| phe.Fasting_ | rs113357907 S24 | ISL1 | rs141022544 S8  | DIAPH1      | 2.93E-06 | 1.00E+00 | 1.55E-03    | 1.36E-13 | 5.54E-06 | 7.87E-10 |
| phe.Fasting_ | rs113357907 S24 | ISL1 | rs141525984 S5  | DIAPH1      | 2.93E-06 | 1.00E+00 | 1.55E-03    | 1.36E-13 | 5.54E-06 | 7.87E-10 |
| phe.Fasting_ | rs113357907 S24 | ISL1 | rs141692339 S3  | "PCDHGA6,Pi | 4.92E-07 | 1.00E+00 | 3.23E-04    | 7.54E-14 | 3.07E-06 | 5.05E-10 |
| phe.Fasting_ | rs113357907 S24 | ISL1 | rs141926074 S8  | ATE1        | 2.19E-18 | 8.94E-11 | 4.33E-14    | 8.91E-14 | 3.63E-06 | 5.94E-10 |
| phe.Fasting_ | rs113357907 S24 | ISL1 | rs142480565 S8  | DIAPH1      | 2.93E-06 | 1.00E+00 | 1.55E-03    | 1.36E-13 | 5.54E-06 | 7.87E-10 |
| phe.Fasting_ | rs113357907 S24 | ISL1 | rs142718558 S7  | "DIAPH1,LOC | 2.93E-06 | 1        | 0.001548    | 1.36E-13 | 5.54E-06 | 7.87E-10 |
| phe.Fasting_ | rs113357907 S24 | ISL1 | rs142789100 S8  | DIAPH1      | 6.63E-07 | 1        | 0.00042181  | 3.67E-14 | 1.49E-06 | 2.64E-10 |
| phe.Fasting_ | rs113357907 S24 | ISL1 | rs142812798 S7  | DIAPH1      | 6.63E-07 | 1.00E+00 | 4.22E-04    | 3.67E-14 | 1.49E-06 | 2.64E-10 |
| phe.Fasting_ | rs113357907 S24 | ISL1 | rs143377827 S13 | "DIAPH1,LOC | 6.95E-07 | 1.00E+00 | 4.40E-04    | 2.99E-14 | 1.22E-06 | 2.23E-10 |
| phe.Fasting_ | rs113357907 S24 | ISL1 | rs143691978 S11 | DIAPH1      | 6.63E-07 | 1.00E+00 | 4.22E-04    | 4.02E-14 | 1.64E-06 | 2.85E-10 |
| phe.Fasting_ | rs113357907 S24 | ISL1 | rs144081334 S11 | DIAPH1      | 6.63E-07 | 1.00E+00 | 4.22E-04    | 4.02E-14 | 1.64E-06 | 2.85E-10 |
| phe.Fasting_ | rs113357907 S24 | ISL1 | rs144613910 S8  | DIAPH1      | 2.93E-06 | 1.00E+00 | 1.55E-03    | 1.36E-13 | 5.54E-06 | 7.87E-10 |
| phe.Fasting_ | rs113357907 S24 | ISL1 | rs145027704 S11 | DIAPH1      | 6.63E-07 | 1.00E+00 | 4.22E-04    | 4.02E-14 | 1.64E-06 | 2.85E-10 |
| phe.Fasting_ | rs113357907 S24 | ISL1 | rs146220673 S7  | DIAPH1      | 2.93E-06 | 1.00E+00 | 1.55E-03    | 1.36E-13 | 5.54E-06 | 7.87E-10 |
| phe.Fasting_ | rs113357907 S24 | ISL1 | rs146622060 S13 | DIAPH1      | 6.63E-07 | 1.00E+00 | 4.22E-04    | 4.02E-14 | 1.64E-06 | 2.85E-10 |
| phe.Fasting_ | rs113357907 S24 | ISL1 | rs146815317 S5  | KPNA3       | 6.45E-17 | 2.64E-09 | 2.97E-13    | 3.26E-14 | 1.33E-06 | 2.39E-10 |
| phe.Fasting_ | rs113357907 S24 | ISL1 | rs146878162 S7  | DIAPH1      | 2.93E-06 | 1.00E+00 | 1.55E-03    | 1.36E-13 | 5.54E-06 | 7.87E-10 |
| phe.Fasting_ | rs113357907 S24 | ISL1 | rs1470889 S5    | ZC3H3       | 9.88E-19 | 4.04E-11 | 2.92E-14    | 2.34E-13 | 9.52E-06 | 1.29E-09 |
| phe.Fasting_ | rs113357907 S24 | ISL1 | rs1470890 S5    | ZC3H3       | 9.88E-19 | 4.04E-11 | 2.92E-14    | 2.34E-13 | 9.52E-06 | 1.29E-09 |
| phe.Fasting_ | rs113357907 S24 | ISL1 | rs147314451 S8  | DIAPH1      | 2.93E-06 | 1.00E+00 | 1.55E-03    | 1.36E-13 | 5.54E-06 | 7.87E-10 |
| phe.Fasting_ | rs113357907 S24 | ISL1 | rs147417996 S7  | DIAPH1      | 6.63E-07 | 1.00E+00 | 4.22E-04    | 4.02E-14 | 1.64E-06 | 2.85E-10 |
| phe.Fasting_ | rs113357907 S24 | ISL1 | rs147506725 S21 | "PCDHGA1,Pi | 3.91E-07 | 1.00E+00 | 2.64E-04    | 5.50E-14 | 2.24E-06 | 3.79E-10 |
| phe.Fasting_ | rs113357907 S24 | ISL1 | rs147646948 S7  | "LOC1005056 | 2.93E-06 | 1        | 0.001548    | 1.36E-13 | 5.54E-06 | 7.87E-10 |
| phe.Fasting_ | rs113357907 S24 | ISL1 | rs147677041 S8  | DIAPH1      | 6.63E-07 | 1        | 0.00042181  | 3.67E-14 | 1.49E-06 | 2.64E-10 |
| phe.Fasting_ | rs113357907 S24 | ISL1 | rs148116628 S7  | DIAPH1      | 2.93E-06 | 1        | 0.001548    | 1.36E-13 | 5.54E-06 | 7.87E-10 |
| phe.Fasting_ | rs113357907 S24 | ISL1 | rs148423011 S7  | DIAPH1      | 2.93E-06 | 1        | 0.001548    | 1.36E-13 | 5.54E-06 | 7.87E-10 |
| phe.Fasting_ | rs113357907 S24 | ISL1 | rs149019627 S8  | DIAPH1      | 6.63E-07 | 1        | 0.00042181  | 3.67E-14 | 1.49E-06 | 2.64E-10 |
| phe.Fasting_ | rs113357907 S24 | ISL1 | rs149075406 S8  | DIAPH1      | 2.93E-06 | 1        | 0.001548    | 1.36E-13 | 5.54E-06 | 7.87E-10 |
| phe.Fasting_ | rs113357907 S24 | ISL1 | rs149334783 S8  | DIAPH1      | 2.93E-06 | 1        | 0.001548    | 1.36E-13 | 5.54E-06 | 7.87E-10 |
| phe.Fasting_ | rs113357907 S24 | ISL1 | rs149553852 S21 | "PCDHGA10,  | 3.91E-07 | 1        | 0.000263579 | 5.50E-14 | 2.24E-06 | 3.79E-10 |

|                             |      |                 |             |          |          |             |          |          |          |
|-----------------------------|------|-----------------|-------------|----------|----------|-------------|----------|----------|----------|
| phe.Fasting_rs113357907 S24 | ISL1 | rs149716949 S5  | DIAPH1      | 3.79E-07 | 1        | 0.000257237 | 1.71E-14 | 6.95E-07 | 1.41E-10 |
| phe.Fasting_rs113357907 S24 | ISL1 | rs149791570 S5  | DIAPH1      | 6.63E-07 | 1        | 0.00042181  | 3.67E-14 | 1.49E-06 | 2.64E-10 |
| phe.Fasting_rs113357907 S24 | ISL1 | rs150117838 S8  | KPNA3       | 6.45E-17 | 2.64E-09 | 2.97E-13    | 3.04E-14 | 1.24E-06 | 2.27E-10 |
| phe.Fasting_rs113357907 S24 | ISL1 | rs150452206 S13 | "DIAPH1,LOC | 2.93E-06 | 1.00E+00 | 1.55E-03    | 1.36E-13 | 5.54E-06 | 7.87E-10 |
| phe.Fasting_rs113357907 S24 | ISL1 | rs150675915 S7  | DIAPH1      | 2.93E-06 | 1        | 0.001548    | 1.36E-13 | 5.54E-06 | 7.87E-10 |
| phe.Fasting_rs113357907 S24 | ISL1 | rs150765570 S7  | DIAPH1      | 2.93E-06 | 1        | 0.001548    | 1.36E-13 | 5.54E-06 | 7.87E-10 |
| phe.Fasting_rs113357907 S24 | ISL1 | rs150916187 S4  | HIST1H2BK   | 2.33E-07 | 1        | 0.000163703 | 6.36E-15 | 2.59E-07 | 5.75E-11 |
| phe.Fasting_rs113357907 S24 | ISL1 | rs150992994 S11 | "PCDHGA5,PI | 2.95E-06 | 1.00E+00 | 1.56E-03    | 1.30E-13 | 5.28E-06 | 7.59E-10 |
| phe.Fasting_rs113357907 S24 | ISL1 | rs151204700 S8  | DIAPH1      | 2.93E-06 | 1        | 0.001548    | 1.36E-13 | 5.54E-06 | 7.87E-10 |
| phe.Fasting_rs113357907 S24 | ISL1 | rs151330468 S8  | DIAPH1      | 6.63E-07 | 1        | 0.00042181  | 4.02E-14 | 1.64E-06 | 2.85E-10 |
| phe.Fasting_rs113357907 S24 | ISL1 | rs16894241 S4   | HIST1H2BK   | 4.15E-07 | 1        | 0.0002778   | 1.05E-14 | 4.28E-07 | 9.12E-11 |
| phe.Fasting_rs113357907 S24 | ISL1 | rs17494290 S5   | CDH2        | 1.20E-19 | 4.91E-12 | 2.23E-14    | 2.40E-12 | 9.78E-05 | 1.03E-08 |
| phe.Fasting_rs113357907 S24 | ISL1 | rs180772028 S8  | "DIAPH1,LOC | 2.93E-06 | 1        | 0.001548    | 1.36E-13 | 5.54E-06 | 7.87E-10 |
| phe.Fasting_rs113357907 S24 | ISL1 | rs181224861 S7  | DIAPH1      | 2.93E-06 | 1.00E+00 | 1.55E-03    | 1.36E-13 | 5.54E-06 | 7.87E-10 |
| phe.Fasting_rs113357907 S24 | ISL1 | rs181247960 S21 | "PCDHGA9,PI | 3.91E-07 | 1.00E+00 | 2.64E-04    | 5.50E-14 | 2.24E-06 | 3.79E-10 |
| phe.Fasting_rs113357907 S24 | ISL1 | rs181824655 S21 | "PCDHGB6,PI | 3.91E-07 | 1.00E+00 | 2.64E-04    | 5.50E-14 | 2.24E-06 | 3.79E-10 |
| phe.Fasting_rs113357907 S24 | ISL1 | rs182714699 S8  | DIAPH1      | 2.93E-06 | 1.00E+00 | 1.55E-03    | 1.36E-13 | 5.54E-06 | 7.87E-10 |
| phe.Fasting_rs113357907 S24 | ISL1 | rs182958142 S8  | DIAPH1      | 1.57E-06 | 1.00E+00 | 9.08E-04    | 1.34E-14 | 5.44E-07 | 1.14E-10 |
| phe.Fasting_rs113357907 S24 | ISL1 | rs182965141 S8  | DIAPH1      | 7.30E-07 | 1.00E+00 | 4.59E-04    | 9.41E-15 | 3.83E-07 | 8.18E-11 |
| phe.Fasting_rs113357907 S24 | ISL1 | rs183597049 S7  | DIAPH1      | 2.93E-06 | 1.00E+00 | 1.55E-03    | 1.36E-13 | 5.54E-06 | 7.87E-10 |
| phe.Fasting_rs113357907 S24 | ISL1 | rs183980988 S2  | NA          | 2.93E-06 | 1.00E+00 | 1.55E-03    | 1.36E-13 | 5.54E-06 | 7.87E-10 |
| phe.Fasting_rs113357907 S24 | ISL1 | rs184233232 S7  | DIAPH1      | 2.93E-06 | 1.00E+00 | 1.55E-03    | 1.36E-13 | 5.54E-06 | 7.87E-10 |
| phe.Fasting_rs113357907 S24 | ISL1 | rs184509477 S13 | "PCDHGB4,PI | 2.93E-06 | 1.00E+00 | 1.55E-03    | 1.36E-13 | 5.54E-06 | 7.87E-10 |
| phe.Fasting_rs113357907 S24 | ISL1 | rs185069296 S15 | "LOC1005056 | 2.93E-06 | 1.00E+00 | 1.55E-03    | 1.36E-13 | 5.54E-06 | 7.87E-10 |
| phe.Fasting_rs113357907 S24 | ISL1 | rs185502834 S8  | DIAPH1      | 6.63E-07 | 1.00E+00 | 4.22E-04    | 3.67E-14 | 1.49E-06 | 2.64E-10 |
| phe.Fasting_rs113357907 S24 | ISL1 | rs185759881 S7  | DIAPH1      | 2.93E-06 | 1.00E+00 | 1.55E-03    | 1.36E-13 | 5.54E-06 | 7.87E-10 |
| phe.Fasting_rs113357907 S24 | ISL1 | rs186288044 S21 | "PCDHGB4,PI | 3.91E-07 | 1.00E+00 | 2.64E-04    | 5.50E-14 | 2.24E-06 | 3.79E-10 |
| phe.Fasting_rs113357907 S24 | ISL1 | rs187000011 S11 | DIAPH1      | 2.93E-06 | 1.00E+00 | 1.55E-03    | 1.36E-13 | 5.54E-06 | 7.87E-10 |
| phe.Fasting_rs113357907 S24 | ISL1 | rs188981295 S5  | "RPS27AP10, | 2.93E-06 | 1.00E+00 | 1.55E-03    | 1.36E-13 | 5.54E-06 | 7.87E-10 |
| phe.Fasting_rs113357907 S24 | ISL1 | rs190559574 S7  | DIAPH1      | 6.63E-07 | 1        | 4.22E-04    | 3.67E-14 | 1.49E-06 | 2.64E-10 |
| phe.Fasting_rs113357907 S24 | ISL1 | rs191544043 S8  | DIAPH1      | 2.93E-06 | 1        | 1.55E-03    | 1.36E-13 | 5.54E-06 | 7.87E-10 |
| phe.Fasting_rs113357907 S24 | ISL1 | rs191766712 S7  | DIAPH1      | 2.93E-06 | 1        | 1.55E-03    | 1.36E-13 | 5.54E-06 | 7.87E-10 |
| phe.Fasting_rs113357907 S24 | ISL1 | rs192690040 S7  | DIAPH1      | 2.93E-06 | 1        | 1.55E-03    | 1.36E-13 | 5.54E-06 | 7.87E-10 |
| phe.Fasting_rs113357907 S24 | ISL1 | rs192765219 S7  | DIAPH1      | 2.93E-06 | 1        | 1.55E-03    | 1.36E-13 | 5.54E-06 | 7.87E-10 |
| phe.Fasting_rs113357907 S24 | ISL1 | rs192770525 S7  | DIAPH1      | 2.93E-06 | 1        | 1.55E-03    | 1.36E-13 | 5.54E-06 | 7.87E-10 |
| phe.Fasting_rs113357907 S24 | ISL1 | rs2285645 S7    | MTMR3       | 4.84E-08 | 1        | 3.98E-05    | 5.24E-14 | 2.13E-06 | 3.61E-10 |
| phe.Fasting_rs113357907 S24 | ISL1 | rs2924507 S5    | ZC3H3       | 9.88E-19 | 4.04E-11 | 2.92E-14    | 2.34E-13 | 9.52E-06 | 1.29E-09 |
| phe.Fasting_rs113357907 S24 | ISL1 | rs2924508 S8    | ZC3H3       | 9.88E-19 | 4.04E-11 | 2.92E-14    | 3.32E-13 | 1.35E-05 | 1.80E-09 |
| phe.Fasting_rs113357907 S24 | ISL1 | rs2924511 S7    | ZC3H3       | 9.88E-19 | 4.04E-11 | 2.92E-14    | 2.10E-13 | 8.55E-06 | 1.17E-09 |
| phe.Fasting_rs113357907 S24 | ISL1 | rs2924512 S7    | ZC3H3       | 1.14E-18 | 4.67E-11 | 3.11E-14    | 2.44E-13 | 9.92E-06 | 1.34E-09 |

|                             |      |            |     |             |          |             |          |          |          |          |
|-----------------------------|------|------------|-----|-------------|----------|-------------|----------|----------|----------|----------|
| phe.Fasting_rs113357907 S24 | ISL1 | rs2956376  | S8  | ZC3H3       | 9.88E-19 | 4.04E-11    | 2.92E-14 | 1.42E-13 | 5.79E-06 | 8.10E-10 |
| phe.Fasting_rs113357907 S24 | ISL1 | rs2980270  | S7  | ZC3H3       | 9.88E-19 | 4.04E-11    | 2.92E-14 | 1.42E-13 | 5.79E-06 | 8.10E-10 |
| phe.Fasting_rs113357907 S24 | ISL1 | rs2980272  | S7  | ZC3H3       | 1.14E-18 | 4.67E-11    | 3.11E-14 | 2.69E-13 | 1.09E-05 | 1.48E-09 |
| phe.Fasting_rs113357907 S24 | ISL1 | rs2980275  | S5  | ZC3H3       | 9.88E-19 | 4.04E-11    | 2.92E-14 | 2.34E-13 | 9.52E-06 | 1.29E-09 |
| phe.Fasting_rs113357907 S24 | ISL1 | rs35990401 | S7  | DIAPH1      | 2.47E-06 | 1.00E+00    | 1.34E-03 | 5.36E-14 | 2.18E-06 | 3.69E-10 |
| phe.Fasting_rs113357907 S24 | ISL1 | rs366767   | S5  | ZC3H3       | 1.45E-18 | 5.92E-11    | 3.49E-14 | 1.59E-13 | 6.46E-06 | 9.00E-10 |
| phe.Fasting_rs113357907 S24 | ISL1 | rs4732511  | S13 | POR         | 5.87E-19 | 2.40E-11    | 2.55E-14 | 2.22E-06 | 1.00E+00 | 2.27E-03 |
| phe.Fasting_rs113357907 S24 | ISL1 | rs55900860 | S7  | DIAPH1      | 6.63E-07 | 1           | 4.22E-04 | 3.67E-14 | 1.49E-06 | 2.64E-10 |
| phe.Fasting_rs113357907 S24 | ISL1 | rs57503635 | S3  | NA          | 3.56E-17 | 1.46E-09    | 1.95E-13 | 1.31E-14 | 5.34E-07 | 1.12E-10 |
| phe.Fasting_rs113357907 S24 | ISL1 | rs60011869 | S16 | NA          | 2.46E-07 | 1           | 1.72E-04 | 5.36E-15 | 2.18E-07 | 4.90E-11 |
| phe.Fasting_rs113357907 S24 | ISL1 | rs6964407  | S7  | POR         | 1.85E-18 | 7.55E-11    | 3.90E-14 | 2.08E-06 | 1.00E+00 | 2.14E-03 |
| phe.Fasting_rs113357907 S24 | ISL1 | rs7004597  | S8  | NA          | 5.53E-12 | 0.000225777 | 9.75E-09 | 3.58E-15 | 1.46E-07 | 3.41E-11 |
| phe.Fasting_rs113357907 S24 | ISL1 | rs7256517  | S7  | CYTH2       | 4.07E-17 | 1.66E-09    | 2.15E-13 | 9.22E-15 | 3.75E-07 | 8.04E-11 |
| phe.Fasting_rs113357907 S24 | ISL1 | rs73283603 | S7  | ZWINT       | 3.93E-17 | 1.60E-09    | 2.11E-13 | 5.99E-15 | 2.44E-07 | 5.44E-11 |
| phe.Fasting_rs113357907 S24 | ISL1 | rs73392640 | S8  | POLR3B      | 1.58E-05 | 1.00E+00    | 6.77E-03 | 9.92E-12 | 4.04E-04 | 3.67E-08 |
| phe.Fasting_rs113357907 S24 | ISL1 | rs73619637 | S8  | NA          | 4.28E-06 | 1.00E+00    | 2.17E-03 | 5.81E-16 | 2.36E-08 | 1.16E-11 |
| phe.Fasting_rs113357907 S24 | ISL1 | rs73794928 | S13 | "PCDHGA9,Pi | 5.60E-07 | 1.00E+00    | 3.64E-04 | 2.67E-14 | 1.09E-06 | 2.02E-10 |
| phe.Fasting_rs113357907 S24 | ISL1 | rs74627895 | S8  | TMEM64      | 4.64E-18 | 1.89E-10    | 6.53E-14 | 4.16E-15 | 1.69E-07 | 3.88E-11 |
| phe.Fasting_rs113357907 S24 | ISL1 | rs74701059 | S24 | C17orf102   | 6.33E-18 | 2.58E-10    | 7.66E-14 | 3.41E-15 | 1.39E-07 | 3.26E-11 |
| phe.Fasting_rs113357907 S24 | ISL1 | rs74914207 | S24 | NA          | 1.33E-12 | 5.44E-05    | 2.62E-09 | 1.66E-11 | 6.76E-04 | 5.95E-08 |
| phe.Fasting_rs113357907 S24 | ISL1 | rs75350765 | S5  | RCL1        | 7.60E-18 | 3.10E-10    | 8.48E-14 | 5.79E-15 | 2.36E-07 | 5.27E-11 |
| phe.Fasting_rs113357907 S24 | ISL1 | rs75374128 | S5  | CNTLN       | 4.46E-18 | 1.82E-10    | 6.40E-14 | 8.93E-11 | 3.63E-03 | 2.75E-07 |
| phe.Fasting_rs113357907 S24 | ISL1 | rs75758702 | S24 | NA          | 1.61E-06 | 1.00E+00    | 9.26E-04 | 2.04E-16 | 8.30E-09 | 7.98E-12 |
| phe.Fasting_rs113357907 S24 | ISL1 | rs75864203 | S8  | CNTLN       | 4.46E-18 | 1.82E-10    | 6.40E-14 | 8.93E-11 | 3.63E-03 | 2.75E-07 |
| phe.Fasting_rs113357907 S24 | ISL1 | rs75949566 | S5  | TMEM64      | 1.56E-17 | 6.37E-10    | 1.20E-13 | 9.89E-15 | 4.03E-07 | 8.59E-11 |
| phe.Fasting_rs113357907 S24 | ISL1 | rs76844308 | S8  | CNTLN       | 3.18E-07 | 1.00E+00    | 2.19E-04 | 3.01E-15 | 1.23E-07 | 2.90E-11 |
| phe.Fasting_rs113357907 S24 | ISL1 | rs7763107  | S8  | FARS2       | 2.78E-17 | 1.13E-09    | 1.64E-13 | 1.37E-15 | 5.56E-08 | 1.54E-11 |
| phe.Fasting_rs113357907 S24 | ISL1 | rs77798597 | S7  | KPNA3       | 6.45E-17 | 2.64E-09    | 2.97E-13 | 3.04E-14 | 1.24E-06 | 2.27E-10 |
| phe.Fasting_rs113357907 S24 | ISL1 | rs77845645 | S21 | NA          | 6.39E-18 | 2.61E-10    | 7.72E-14 | 1.26E-14 | 5.13E-07 | 1.08E-10 |
| phe.Fasting_rs113357907 S24 | ISL1 | rs78353402 | S8  | AP3M2       | 5.53E-12 | 2.26E-04    | 9.75E-09 | 5.21E-15 | 2.12E-07 | 4.77E-11 |
| phe.Fasting_rs113357907 S24 | ISL1 | rs78516788 | S8  | SLC38A1     | 4.92E-18 | 2.01E-10    | 6.76E-14 | 1.07E-14 | 4.35E-07 | 9.27E-11 |
| phe.Fasting_rs113357907 S24 | ISL1 | rs78697063 | S5  | MSI2        | 1.84E-20 | 7.51E-13    | 1.89E-14 | 3.34E-15 | 1.36E-07 | 3.20E-11 |
| phe.Fasting_rs113357907 S24 | ISL1 | rs78722272 | S5  | CNTLN       | 4.46E-18 | 1.82E-10    | 6.40E-14 | 8.82E-11 | 3.59E-03 | 2.72E-07 |
| phe.Fasting_rs113357907 S24 | ISL1 | rs78736524 | S5  | KPNA3       | 6.45E-17 | 2.64E-09    | 2.97E-13 | 3.26E-14 | 1.33E-06 | 2.39E-10 |
| phe.Fasting_rs113357907 S24 | ISL1 | rs78990344 | S2  | LOC10050631 | 1.53E-17 | 6.25E-10    | 1.19E-13 | 6.84E-15 | 2.78E-07 | 6.11E-11 |
| phe.Fasting_rs113357907 S24 | ISL1 | rs79517926 | S15 | "DIAPH1,LOC | 6.15E-07 | 1.00E+00    | 3.95E-04 | 6.14E-15 | 2.50E-07 | 5.56E-11 |
| phe.Fasting_rs113357907 S24 | ISL1 | rs79703349 | S24 | C17orf102   | 6.33E-18 | 2.58E-10    | 7.66E-14 | 3.88E-15 | 1.58E-07 | 3.65E-11 |
| phe.Fasting_rs113357907 S24 | ISL1 | rs79781495 | S8  | KPNA3       | 6.45E-17 | 2.64E-09    | 2.97E-13 | 3.04E-14 | 1.24E-06 | 2.27E-10 |
| phe.Fasting_rs113357907 S24 | ISL1 | rs80332465 | S5  | KPNA3       | 7.00E-17 | 2.86E-09    | 3.16E-13 | 3.19E-14 | 1.30E-06 | 2.35E-10 |
| phe.Fasting_rs113357907 S24 | ISL1 | rs80334773 | S5  | KPNA3       | 7.00E-17 | 2.86E-09    | 3.16E-13 | 3.19E-14 | 1.30E-06 | 2.35E-10 |

|              |             |     |             |             |     |             |          |          |             |          |          |          |
|--------------|-------------|-----|-------------|-------------|-----|-------------|----------|----------|-------------|----------|----------|----------|
| phe.Fasting_ | rs113357907 | S24 | ISL1        | rs8075478   | S8  | MYH10       | 2.01E-07 | 1        | 1.43E-04    | 1.33E-15 | 5.41E-08 | 1.51E-11 |
| phe.Fasting_ | rs113357907 | S24 | ISL1        | rs9620939   | S7  | MTMR3       | 5.12E-08 | 1        | 4.18E-05    | 1.05E-16 | 4.26E-09 | 5.84E-12 |
| phe.Fasting_ | rs113357907 | S24 | ISL1        | rs9625903   | S7  | MTMR3       | 6.13E-08 | 1        | 4.93E-05    | 3.90E-17 | 1.59E-09 | 3.33E-12 |
| phe.Fasting_ | rs113360615 | S5  | UBE2W       | rs139070959 | S8  | RPN2        | 1.18E-06 | 1.00E+00 | 7.01E-04    | 2.24E-07 | 1.00E+00 | 2.93E-04 |
| phe.Fasting_ | rs113360615 | S5  | UBE2W       | rs145412529 | S8  | "RBL1,RPS3A | 6.02E-07 | 1.00E+00 | 3.88E-04    | 1.57E-06 | 1.00E+00 | 1.67E-03 |
| phe.Fasting_ | rs113568654 | S12 | SPTLC1      | rs114968018 | S21 | NA          | 8.27E-14 | 3.38E-06 | 1.89E-10    | 5.41E-06 | 1.00E+00 | 4.90E-03 |
| phe.Fasting_ | rs113568654 | S12 | SPTLC1      | rs115305957 | S23 | NA          | 1.91E-06 | 1.00E+00 | 1.08E-03    | 1.26E-10 | 5.11E-03 | 3.79E-07 |
| phe.Fasting_ | rs113568654 | S12 | SPTLC1      | rs115787552 | S5  | KPNA3       | 8.00E-06 | 1.00E+00 | 3.76E-03    | 1.22E-14 | 4.95E-07 | 1.04E-10 |
| phe.Fasting_ | rs113568654 | S12 | SPTLC1      | rs116079984 | S8  | KPNA3       | 8.00E-06 | 1.00E+00 | 3.76E-03    | 1.48E-14 | 6.04E-07 | 1.25E-10 |
| phe.Fasting_ | rs113568654 | S12 | SPTLC1      | rs12581352  | S2  | NA          | 7.73E-18 | 3.16E-10 | 8.51E-14    | 1.06E-12 | 4.32E-05 | 4.92E-09 |
| phe.Fasting_ | rs113568654 | S12 | SPTLC1      | rs140524622 | S7  | MRPL10      | 4.24E-07 | 1.00E+00 | 2.83E-04    | 8.12E-08 | 1.00E+00 | 1.18E-04 |
| phe.Fasting_ | rs113568654 | S12 | SPTLC1      | rs146815317 | S5  | KPNA3       | 8.00E-06 | 1.00E+00 | 3.76E-03    | 1.22E-14 | 4.95E-07 | 1.04E-10 |
| phe.Fasting_ | rs113568654 | S12 | SPTLC1      | rs150117838 | S8  | KPNA3       | 8.00E-06 | 1.00E+00 | 3.76E-03    | 1.18E-14 | 4.79E-07 | 1.01E-10 |
| phe.Fasting_ | rs113568654 | S12 | SPTLC1      | rs2153597   | S8  | ZNF438      | 9.55E-06 | 1.00E+00 | 4.39E-03    | 2.24E-06 | 1.00E+00 | 2.29E-03 |
| phe.Fasting_ | rs113568654 | S12 | SPTLC1      | rs4820499   | S10 | PACSLIN2    | 3.19E-09 | 0.130452 | 3.24E-06    | 3.42E-10 | 1.39E-02 | 9.10E-07 |
| phe.Fasting_ | rs113568654 | S12 | SPTLC1      | rs57503635  | S3  | NA          | 9.34E-07 | 1.00E+00 | 5.70E-04    | 1.97E-14 | 8.01E-07 | 1.58E-10 |
| phe.Fasting_ | rs113568654 | S12 | SPTLC1      | rs7256517   | S7  | CYTH2       | 2.17E-13 | 8.84E-06 | 4.71E-10    | 4.35E-07 | 1.00E+00 | 5.27E-04 |
| phe.Fasting_ | rs113568654 | S12 | SPTLC1      | rs73392640  | S8  | POLR3B      | 3.02E-07 | 1.00E+00 | 2.08E-04    | 2.03E-08 | 8.28E-01 | 3.48E-05 |
| phe.Fasting_ | rs113568654 | S12 | SPTLC1      | rs73619637  | S8  | NA          | 5.45E-17 | 2.22E-09 | 2.64E-13    | 7.11E-08 | 1.00E+00 | 1.04E-04 |
| phe.Fasting_ | rs113568654 | S12 | SPTLC1      | rs74701059  | S24 | C17orf102   | 1.84E-06 | 1.00E+00 | 1.04E-03    | 1.40E-10 | 5.71E-03 | 4.21E-07 |
| phe.Fasting_ | rs113568654 | S12 | SPTLC1      | rs74914207  | S24 | NA          | 3.57E-06 | 1.00E+00 | 1.84E-03    | 4.06E-08 | 1.00E+00 | 6.35E-05 |
| phe.Fasting_ | rs113568654 | S12 | SPTLC1      | rs7511534   | S12 | PACSLIN2    | 2.48E-09 | 0.101291 | 2.56E-06    | 4.30E-10 | 1.75E-02 | 1.13E-06 |
| phe.Fasting_ | rs113568654 | S12 | SPTLC1      | rs77798597  | S7  | KPNA3       | 8.00E-06 | 1        | 3.76E-03    | 1.18E-14 | 4.79E-07 | 1.01E-10 |
| phe.Fasting_ | rs113568654 | S12 | SPTLC1      | rs78736524  | S5  | KPNA3       | 8.00E-06 | 1.00E+00 | 3.76E-03    | 1.22E-14 | 4.95E-07 | 1.04E-10 |
| phe.Fasting_ | rs113568654 | S12 | SPTLC1      | rs79703349  | S24 | C17orf102   | 1.84E-06 | 1.00E+00 | 1.04E-03    | 1.75E-10 | 7.11E-03 | 5.04E-07 |
| phe.Fasting_ | rs113568654 | S12 | SPTLC1      | rs79781495  | S8  | KPNA3       | 8.00E-06 | 1        | 0.00376035  | 1.18E-14 | 4.79E-07 | 1.01E-10 |
| phe.Fasting_ | rs113568654 | S12 | SPTLC1      | rs80332465  | S5  | KPNA3       | 1.14E-05 | 1        | 0.00513361  | 1.27E-14 | 5.16E-07 | 1.08E-10 |
| phe.Fasting_ | rs113568654 | S12 | SPTLC1      | rs80334773  | S5  | KPNA3       | 1.14E-05 | 1        | 0.00513361  | 1.27E-14 | 5.16E-07 | 1.08E-10 |
| phe.Fasting_ | rs113602719 | S8  | "FANCD2,FAI | rs112027720 | S7  | DIAPH1      | 4.36E-07 | 1        | 0.000289116 | 1.54E-06 | 1.00E+00 | 1.65E-03 |
| phe.Fasting_ | rs113602719 | S8  | "FANCD2,FAI | rs113219478 | S7  | DIAPH1      | 4.36E-07 | 1        | 0.000289116 | 1.54E-06 | 1.00E+00 | 1.65E-03 |
| phe.Fasting_ | rs113602719 | S8  | "FANCD2,FAI | rs116279995 | S20 | "PCDHGA4,PI | 6.20E-07 | 1        | 0.000397692 | 3.33E-06 | 1.00E+00 | 3.20E-03 |
| phe.Fasting_ | rs113602719 | S8  | "FANCD2,FAI | rs138090701 | S5  | HDAC3       | 9.73E-07 | 1        | 0.000591548 | 5.43E-06 | 1.00E+00 | 4.91E-03 |
| phe.Fasting_ | rs113602719 | S8  | "FANCD2,FAI | rs138136869 | S7  | DIAPH1      | 7.49E-08 | 1        | 5.87E-05    | 2.68E-07 | 1.00E+00 | 3.43E-04 |
| phe.Fasting_ | rs113602719 | S8  | "FANCD2,FAI | rs138457103 | S10 | DIAPH1      | 2.44E-07 | 1        | 0.00017071  | 1.29E-06 | 1.00E+00 | 1.42E-03 |
| phe.Fasting_ | rs113602719 | S8  | "FANCD2,FAI | rs138487229 | S11 | DIAPH1      | 4.36E-07 | 1        | 0.000289116 | 1.54E-06 | 1.00E+00 | 1.65E-03 |
| phe.Fasting_ | rs113602719 | S8  | "FANCD2,FAI | rs138738950 | S8  | "PCDHGB2,PI | 4.36E-07 | 1        | 0.000289116 | 1.52E-06 | 1.00E+00 | 1.64E-03 |
| phe.Fasting_ | rs113602719 | S8  | "FANCD2,FAI | rs139297927 | S8  | DIAPH1      | 4.36E-07 | 1        | 0.000289116 | 1.54E-06 | 1.00E+00 | 1.65E-03 |
| phe.Fasting_ | rs113602719 | S8  | "FANCD2,FAI | rs139337303 | S8  | DIAPH1      | 4.36E-07 | 1        | 0.000289116 | 1.54E-06 | 1.00E+00 | 1.65E-03 |
| phe.Fasting_ | rs113602719 | S8  | "FANCD2,FAI | rs139403963 | S8  | DIAPH1      | 7.49E-08 | 1        | 5.87E-05    | 2.68E-07 | 1.00E+00 | 3.43E-04 |
| phe.Fasting_ | rs113602719 | S8  | "FANCD2,FAI | rs139621309 | S18 | "LOC1005056 | 4.36E-07 | 1        | 0.000289116 | 1.54E-06 | 1.00E+00 | 1.65E-03 |

|              |                |             |                 |             |          |          |             |          |          |          |
|--------------|----------------|-------------|-----------------|-------------|----------|----------|-------------|----------|----------|----------|
| phe.Fasting_ | rs113602719 S8 | "FANCD2,FAI | rs139828110 S8  | DIAPH1      | 7.49E-08 | 1.00E+00 | 5.87E-05    | 2.68E-07 | 1.00E+00 | 3.43E-04 |
| phe.Fasting_ | rs113602719 S8 | "FANCD2,FAI | rs140070363 S8  | DIAPH1      | 4.36E-07 | 1.00E+00 | 2.89E-04    | 1.54E-06 | 1.00E+00 | 1.65E-03 |
| phe.Fasting_ | rs113602719 S8 | "FANCD2,FAI | rs140644750 S13 | DIAPH1      | 4.36E-07 | 1        | 2.89E-04    | 1.54E-06 | 1.00E+00 | 1.65E-03 |
| phe.Fasting_ | rs113602719 S8 | "FANCD2,FAI | rs141022544 S8  | DIAPH1      | 4.36E-07 | 1        | 2.89E-04    | 1.54E-06 | 1.00E+00 | 1.65E-03 |
| phe.Fasting_ | rs113602719 S8 | "FANCD2,FAI | rs141525984 S5  | DIAPH1      | 4.36E-07 | 1        | 0.000289116 | 1.54E-06 | 1.00E+00 | 1.65E-03 |
| phe.Fasting_ | rs113602719 S8 | "FANCD2,FAI | rs141692339 S3  | "PCDHGA6,Pi | 8.21E-07 | 1        | 5.08E-04    | 4.90E-06 | 1.00E+00 | 4.49E-03 |
| phe.Fasting_ | rs113602719 S8 | "FANCD2,FAI | rs141926074 S8  | ATE1        | 2.88E-07 | 1        | 1.99E-04    | 2.02E-06 | 1.00E+00 | 2.09E-03 |
| phe.Fasting_ | rs113602719 S8 | "FANCD2,FAI | rs142480565 S8  | DIAPH1      | 4.36E-07 | 1        | 2.89E-04    | 1.54E-06 | 1.00E+00 | 1.65E-03 |
| phe.Fasting_ | rs113602719 S8 | "FANCD2,FAI | rs142718558 S7  | "DIAPH1,LOC | 4.36E-07 | 1        | 2.89E-04    | 1.54E-06 | 1.00E+00 | 1.65E-03 |
| phe.Fasting_ | rs113602719 S8 | "FANCD2,FAI | rs142789100 S8  | DIAPH1      | 7.49E-08 | 1        | 5.87E-05    | 2.68E-07 | 1.00E+00 | 3.43E-04 |
| phe.Fasting_ | rs113602719 S8 | "FANCD2,FAI | rs142812798 S7  | DIAPH1      | 7.49E-08 | 1        | 5.87E-05    | 2.68E-07 | 1.00E+00 | 3.43E-04 |
| phe.Fasting_ | rs113602719 S8 | "FANCD2,FAI | rs143377827 S13 | "DIAPH1,LOC | 8.22E-08 | 1        | 6.39E-05    | 2.21E-07 | 1.00E+00 | 2.90E-04 |
| phe.Fasting_ | rs113602719 S8 | "FANCD2,FAI | rs143691978 S11 | DIAPH1      | 7.49E-08 | 1        | 5.87E-05    | 2.79E-07 | 1.00E+00 | 3.56E-04 |
| phe.Fasting_ | rs113602719 S8 | "FANCD2,FAI | rs144081334 S11 | DIAPH1      | 7.49E-08 | 1        | 5.87E-05    | 2.79E-07 | 1.00E+00 | 3.56E-04 |
| phe.Fasting_ | rs113602719 S8 | "FANCD2,FAI | rs144613910 S8  | DIAPH1      | 4.36E-07 | 1        | 0.000289116 | 1.54E-06 | 1.00E+00 | 1.65E-03 |
| phe.Fasting_ | rs113602719 S8 | "FANCD2,FAI | rs145027704 S11 | DIAPH1      | 7.49E-08 | 1.00E+00 | 5.87E-05    | 2.79E-07 | 1.00E+00 | 3.56E-04 |
| phe.Fasting_ | rs113602719 S8 | "FANCD2,FAI | rs146220673 S7  | DIAPH1      | 4.36E-07 | 1.00E+00 | 2.89E-04    | 1.54E-06 | 1.00E+00 | 1.65E-03 |
| phe.Fasting_ | rs113602719 S8 | "FANCD2,FAI | rs146622060 S13 | DIAPH1      | 7.49E-08 | 1.00E+00 | 5.87E-05    | 2.79E-07 | 1.00E+00 | 3.56E-04 |
| phe.Fasting_ | rs113602719 S8 | "FANCD2,FAI | rs146878162 S7  | DIAPH1      | 4.36E-07 | 1.00E+00 | 2.89E-04    | 1.54E-06 | 1.00E+00 | 1.65E-03 |
| phe.Fasting_ | rs113602719 S8 | "FANCD2,FAI | rs147314451 S8  | DIAPH1      | 4.36E-07 | 1.00E+00 | 2.89E-04    | 1.54E-06 | 1.00E+00 | 1.65E-03 |
| phe.Fasting_ | rs113602719 S8 | "FANCD2,FAI | rs147417996 S7  | DIAPH1      | 7.49E-08 | 1.00E+00 | 5.87E-05    | 2.79E-07 | 1.00E+00 | 3.56E-04 |
| phe.Fasting_ | rs113602719 S8 | "FANCD2,FAI | rs147506725 S21 | "PCDHGA1,Pi | 6.20E-07 | 1        | 0.000397692 | 3.33E-06 | 1.00E+00 | 3.20E-03 |
| phe.Fasting_ | rs113602719 S8 | "FANCD2,FAI | rs147646948 S7  | "LOC1005056 | 4.36E-07 | 1        | 0.000289116 | 1.54E-06 | 1.00E+00 | 1.65E-03 |
| phe.Fasting_ | rs113602719 S8 | "FANCD2,FAI | rs147677041 S8  | DIAPH1      | 7.49E-08 | 1.00E+00 | 5.87E-05    | 2.68E-07 | 1.00E+00 | 3.43E-04 |
| phe.Fasting_ | rs113602719 S8 | "FANCD2,FAI | rs148116628 S7  | DIAPH1      | 4.36E-07 | 1.00E+00 | 2.89E-04    | 1.54E-06 | 1.00E+00 | 1.65E-03 |
| phe.Fasting_ | rs113602719 S8 | "FANCD2,FAI | rs148423011 S7  | DIAPH1      | 4.36E-07 | 1        | 0.000289116 | 1.54E-06 | 1.00E+00 | 1.65E-03 |
| phe.Fasting_ | rs113602719 S8 | "FANCD2,FAI | rs149019627 S8  | DIAPH1      | 7.49E-08 | 1.00E+00 | 5.87E-05    | 2.68E-07 | 1.00E+00 | 3.43E-04 |
| phe.Fasting_ | rs113602719 S8 | "FANCD2,FAI | rs149075406 S8  | DIAPH1      | 4.36E-07 | 1.00E+00 | 2.89E-04    | 1.54E-06 | 1.00E+00 | 1.65E-03 |
| phe.Fasting_ | rs113602719 S8 | "FANCD2,FAI | rs149334783 S8  | DIAPH1      | 4.36E-07 | 1        | 2.89E-04    | 1.54E-06 | 1.00E+00 | 1.65E-03 |
| phe.Fasting_ | rs113602719 S8 | "FANCD2,FAI | rs149553852 S21 | "PCDHGA10,I | 6.20E-07 | 1        | 3.98E-04    | 3.33E-06 | 1.00E+00 | 3.20E-03 |
| phe.Fasting_ | rs113602719 S8 | "FANCD2,FAI | rs149716949 S5  | DIAPH1      | 4.70E-08 | 1        | 3.87E-05    | 2.98E-07 | 1.00E+00 | 3.77E-04 |
| phe.Fasting_ | rs113602719 S8 | "FANCD2,FAI | rs149791570 S5  | DIAPH1      | 7.49E-08 | 1        | 5.87E-05    | 2.68E-07 | 1.00E+00 | 3.43E-04 |
| phe.Fasting_ | rs113602719 S8 | "FANCD2,FAI | rs150452206 S13 | "DIAPH1,LOC | 4.36E-07 | 1        | 2.89E-04    | 1.54E-06 | 1.00E+00 | 1.65E-03 |
| phe.Fasting_ | rs113602719 S8 | "FANCD2,FAI | rs150675915 S7  | DIAPH1      | 4.36E-07 | 1        | 2.89E-04    | 1.54E-06 | 1.00E+00 | 1.65E-03 |
| phe.Fasting_ | rs113602719 S8 | "FANCD2,FAI | rs150765570 S7  | DIAPH1      | 4.36E-07 | 1        | 2.89E-04    | 1.54E-06 | 1.00E+00 | 1.65E-03 |
| phe.Fasting_ | rs113602719 S8 | "FANCD2,FAI | rs150992994 S11 | "PCDHGA5,Pi | 4.50E-07 | 1        | 2.98E-04    | 1.47E-06 | 1.00E+00 | 1.59E-03 |
| phe.Fasting_ | rs113602719 S8 | "FANCD2,FAI | rs151204700 S8  | DIAPH1      | 4.36E-07 | 1        | 2.89E-04    | 1.54E-06 | 1.00E+00 | 1.65E-03 |
| phe.Fasting_ | rs113602719 S8 | "FANCD2,FAI | rs151330468 S8  | DIAPH1      | 7.49E-08 | 1        | 5.87E-05    | 2.79E-07 | 1.00E+00 | 3.56E-04 |
| phe.Fasting_ | rs113602719 S8 | "FANCD2,FAI | rs180772028 S8  | "DIAPH1,LOC | 4.36E-07 | 1        | 2.89E-04    | 1.54E-06 | 1.00E+00 | 1.65E-03 |
| phe.Fasting_ | rs113602719 S8 | "FANCD2,FAI | rs181224861 S7  | DIAPH1      | 4.36E-07 | 1        | 2.89E-04    | 1.54E-06 | 1.00E+00 | 1.65E-03 |

|              |                 |             |                 |             |          |           |             |          |          |          |
|--------------|-----------------|-------------|-----------------|-------------|----------|-----------|-------------|----------|----------|----------|
| phe.Fasting_ | rs113602719 S8  | "FANCD2,FAI | rs181247960 S21 | "PCDHGA9,PI | 6.20E-07 | 1         | 3.98E-04    | 3.33E-06 | 1.00E+00 | 3.20E-03 |
| phe.Fasting_ | rs113602719 S8  | "FANCD2,FAI | rs181824655 S21 | "PCDHGB6,PI | 6.20E-07 | 1         | 3.98E-04    | 3.33E-06 | 1.00E+00 | 3.20E-03 |
| phe.Fasting_ | rs113602719 S8  | "FANCD2,FAI | rs182714699 S8  | DIAPH1      | 4.36E-07 | 1         | 2.89E-04    | 1.54E-06 | 1.00E+00 | 1.65E-03 |
| phe.Fasting_ | rs113602719 S8  | "FANCD2,FAI | rs182958142 S8  | DIAPH1      | 2.15E-07 | 1         | 1.52E-04    | 5.42E-06 | 1.00E+00 | 4.91E-03 |
| phe.Fasting_ | rs113602719 S8  | "FANCD2,FAI | rs182965141 S8  | DIAPH1      | 8.44E-08 | 1         | 6.55E-05    | 2.83E-06 | 1.00E+00 | 2.78E-03 |
| phe.Fasting_ | rs113602719 S8  | "FANCD2,FAI | rs183597049 S7  | DIAPH1      | 4.36E-07 | 1         | 2.89E-04    | 1.54E-06 | 1.00E+00 | 1.65E-03 |
| phe.Fasting_ | rs113602719 S8  | "FANCD2,FAI | rs183980988 S2  | NA          | 4.36E-07 | 1         | 2.89E-04    | 1.54E-06 | 1.00E+00 | 1.65E-03 |
| phe.Fasting_ | rs113602719 S8  | "FANCD2,FAI | rs184233232 S7  | DIAPH1      | 4.36E-07 | 1         | 2.89E-04    | 1.54E-06 | 1.00E+00 | 1.65E-03 |
| phe.Fasting_ | rs113602719 S8  | "FANCD2,FAI | rs184509477 S13 | "PCDHGB4,PI | 4.36E-07 | 1         | 2.89E-04    | 1.54E-06 | 1.00E+00 | 1.65E-03 |
| phe.Fasting_ | rs113602719 S8  | "FANCD2,FAI | rs185069296 S15 | "LOC1005056 | 4.36E-07 | 1         | 2.89E-04    | 1.54E-06 | 1.00E+00 | 1.65E-03 |
| phe.Fasting_ | rs113602719 S8  | "FANCD2,FAI | rs185502834 S8  | DIAPH1      | 7.49E-08 | 1.00E+00  | 5.87E-05    | 2.68E-07 | 1.00E+00 | 3.43E-04 |
| phe.Fasting_ | rs113602719 S8  | "FANCD2,FAI | rs185759881 S7  | DIAPH1      | 4.36E-07 | 1.00E+00  | 2.89E-04    | 1.54E-06 | 1.00E+00 | 1.65E-03 |
| phe.Fasting_ | rs113602719 S8  | "FANCD2,FAI | rs186288044 S21 | "PCDHGB4,PI | 6.20E-07 | 1.00E+00  | 3.98E-04    | 3.33E-06 | 1.00E+00 | 3.20E-03 |
| phe.Fasting_ | rs113602719 S8  | "FANCD2,FAI | rs187000011 S11 | DIAPH1      | 4.36E-07 | 1.00E+00  | 2.89E-04    | 1.54E-06 | 1.00E+00 | 1.65E-03 |
| phe.Fasting_ | rs113602719 S8  | "FANCD2,FAI | rs188981295 S5  | "RPS27AP10, | 4.36E-07 | 1.00E+00  | 2.89E-04    | 1.54E-06 | 1.00E+00 | 1.65E-03 |
| phe.Fasting_ | rs113602719 S8  | "FANCD2,FAI | rs190559574 S7  | DIAPH1      | 7.49E-08 | 1.00E+00  | 5.87E-05    | 2.68E-07 | 1.00E+00 | 3.43E-04 |
| phe.Fasting_ | rs113602719 S8  | "FANCD2,FAI | rs191544043 S8  | DIAPH1      | 4.36E-07 | 1.00E+00  | 2.89E-04    | 1.54E-06 | 1.00E+00 | 1.65E-03 |
| phe.Fasting_ | rs113602719 S8  | "FANCD2,FAI | rs191766712 S7  | DIAPH1      | 4.36E-07 | 1.00E+00  | 2.89E-04    | 1.54E-06 | 1.00E+00 | 1.65E-03 |
| phe.Fasting_ | rs113602719 S8  | "FANCD2,FAI | rs192690040 S7  | DIAPH1      | 4.36E-07 | 1.00E+00  | 2.89E-04    | 1.54E-06 | 1.00E+00 | 1.65E-03 |
| phe.Fasting_ | rs113602719 S8  | "FANCD2,FAI | rs192765219 S7  | DIAPH1      | 4.36E-07 | 1         | 0.000289116 | 1.54E-06 | 1.00E+00 | 1.65E-03 |
| phe.Fasting_ | rs113602719 S8  | "FANCD2,FAI | rs192770525 S7  | DIAPH1      | 4.36E-07 | 1         | 0.000289116 | 1.54E-06 | 1.00E+00 | 1.65E-03 |
| phe.Fasting_ | rs113602719 S8  | "FANCD2,FAI | rs35990401 S7   | DIAPH1      | 3.35E-07 | 1         | 0.000229529 | 5.33E-07 | 1.00E+00 | 6.34E-04 |
| phe.Fasting_ | rs113602719 S8  | "FANCD2,FAI | rs3856797 S12   | VGLL4       | 1.22E-05 | 1         | 0.00541401  | 9.28E-07 | 1.00E+00 | 1.05E-03 |
| phe.Fasting_ | rs113602719 S8  | "FANCD2,FAI | rs55900860 S7   | DIAPH1      | 7.49E-08 | 1.00E+00  | 5.87E-05    | 2.68E-07 | 1.00E+00 | 3.43E-04 |
| phe.Fasting_ | rs113602719 S8  | "FANCD2,FAI | rs57503635 S3   | NA          | 3.60E-09 | 1.47E-01  | 3.63E-06    | 4.32E-17 | 1.76E-09 | 3.52E-12 |
| phe.Fasting_ | rs113602719 S8  | "FANCD2,FAI | rs79517926 S15  | "DIAPH1,LOC | 1.06E-07 | 1         | 8.00E-05    | 2.75E-06 | 1.00E+00 | 2.71E-03 |
| phe.Fasting_ | rs114032844 S21 | NA          | rs139070959 S8  | RPN2        | 9.49E-17 | 3.88E-09  | 4.08E-13    | 1.38E-14 | 5.63E-07 | 1.17E-10 |
| phe.Fasting_ | rs114032844 S21 | NA          | rs145412529 S8  | "RBL1,RPS3A | 5.68E-17 | 2.32E-09  | 2.72E-13    | 1.54E-14 | 6.27E-07 | 1.29E-10 |
| phe.Fasting_ | rs114032844 S21 | NA          | rs57503635 S3   | NA          | 3.06E-07 | 1         | 2.11E-04    | 8.44E-07 | 1.00E+00 | 9.67E-04 |
| phe.Fasting_ | rs114041958 S24 | HLA-G       | rs114764631 S23 | NA          | 2.82E-07 | 1         | 1.96E-04    | 4.13E-09 | 1.68E-01 | 8.45E-06 |
| phe.Fasting_ | rs114041958 S24 | HLA-G       | rs139070959 S8  | RPN2        | 1.85E-09 | 0.0755239 | 1.94E-06    | 2.41E-06 | 1.00E+00 | 2.43E-03 |
| phe.Fasting_ | rs114041958 S24 | HLA-G       | rs145412529 S8  | "RBL1,RPS3A | 1.03E-09 | 0.0420988 | 1.13E-06    | 2.51E-06 | 1.00E+00 | 2.51E-03 |
| phe.Fasting_ | rs114214896 S24 | HCG4P8      | rs114764631 S23 | NA          | 2.82E-07 | 1         | 1.96E-04    | 4.13E-09 | 1.68E-01 | 8.45E-06 |
| phe.Fasting_ | rs114214896 S24 | HCG4P8      | rs139070959 S8  | RPN2        | 1.85E-09 | 0.0755239 | 1.94E-06    | 2.41E-06 | 1.00E+00 | 2.43E-03 |
| phe.Fasting_ | rs114214896 S24 | HCG4P8      | rs145412529 S8  | "RBL1,RPS3A | 1.03E-09 | 0.0420988 | 1.13E-06    | 2.51E-06 | 1.00E+00 | 2.51E-03 |
| phe.Fasting_ | rs114251653 S24 | NA          | rs114764631 S23 | NA          | 2.82E-07 | 1         | 1.96E-04    | 4.13E-09 | 1.68E-01 | 8.45E-06 |
| phe.Fasting_ | rs114251653 S24 | NA          | rs139070959 S8  | RPN2        | 1.85E-09 | 0.0755239 | 1.94E-06    | 2.41E-06 | 1.00E+00 | 2.43E-03 |
| phe.Fasting_ | rs114251653 S24 | NA          | rs145412529 S8  | "RBL1,RPS3A | 1.03E-09 | 4.21E-02  | 1.13E-06    | 2.51E-06 | 1.00E+00 | 2.51E-03 |
| phe.Fasting_ | rs114311782 S19 | NA          | rs114764631 S23 | NA          | 2.82E-07 | 1.00E+00  | 1.96E-04    | 4.13E-09 | 1.68E-01 | 8.45E-06 |
| phe.Fasting_ | rs114311782 S19 | NA          | rs139070959 S8  | RPN2        | 1.85E-09 | 7.55E-02  | 1.94E-06    | 2.41E-06 | 1.00E+00 | 2.43E-03 |

|                             |       |                |             |          |          |          |          |          |          |
|-----------------------------|-------|----------------|-------------|----------|----------|----------|----------|----------|----------|
| phe.Fasting_rs114311782 S19 | NA    | rs145412529 S8 | "RBL1,RPS3A | 1.03E-09 | 4.21E-02 | 1.13E-06 | 2.51E-06 | 1.00E+00 | 2.51E-03 |
| phe.Fasting_rs114334325 S7  | AP3M2 | rs111576333 S5 | TMEM64      | 1.38E-15 | 5.65E-08 | 3.99E-12 | 6.72E-08 | 1.00E+00 | 1.00E-04 |
| phe.Fasting_rs114334325 S7  | AP3M2 | rs112091318 S5 | TMEM64      | 3.67E-16 | 1.50E-08 | 1.20E-12 | 3.09E-08 | 1.00E+00 | 4.98E-05 |
| phe.Fasting_rs114334325 S7  | AP3M2 | rs11989304 S4  | TMEM64      | 1.38E-15 | 5.65E-08 | 3.99E-12 | 1.33E-06 | 1.00E+00 | 1.46E-03 |
| phe.Fasting_rs114334325 S7  | AP3M2 | rs141926074 S8 | ATE1        | 5.12E-17 | 2.09E-09 | 2.51E-13 | 3.83E-08 | 1.00E+00 | 6.03E-05 |
| phe.Fasting_rs114334325 S7  | AP3M2 | rs1470889 S5   | ZC3H3       | 4.41E-09 | 1.80E-01 | 4.35E-06 | 4.45E-07 | 1.00E+00 | 5.38E-04 |
| phe.Fasting_rs114334325 S7  | AP3M2 | rs1470890 S5   | ZC3H3       | 4.41E-09 | 1.80E-01 | 4.35E-06 | 4.45E-07 | 1.00E+00 | 5.38E-04 |
| phe.Fasting_rs114334325 S7  | AP3M2 | rs2924507 S5   | ZC3H3       | 4.41E-09 | 0.180281 | 4.35E-06 | 4.45E-07 | 1.00E+00 | 5.38E-04 |
| phe.Fasting_rs114334325 S7  | AP3M2 | rs2924508 S8   | ZC3H3       | 4.41E-09 | 0.180281 | 4.35E-06 | 1.22E-08 | 4.96E-01 | 2.22E-05 |
| phe.Fasting_rs114334325 S7  | AP3M2 | rs2924511 S7   | ZC3H3       | 4.41E-09 | 0.180281 | 4.35E-06 | 3.96E-07 | 1.00E+00 | 4.84E-04 |
| phe.Fasting_rs114334325 S7  | AP3M2 | rs2924512 S7   | ZC3H3       | 4.92E-09 | 0.201    | 4.82E-06 | 5.18E-07 | 1.00E+00 | 6.17E-04 |
| phe.Fasting_rs114334325 S7  | AP3M2 | rs2956376 S8   | ZC3H3       | 4.41E-09 | 1.80E-01 | 4.35E-06 | 2.73E-07 | 1.00E+00 | 3.49E-04 |
| phe.Fasting_rs114334325 S7  | AP3M2 | rs2980270 S7   | ZC3H3       | 4.41E-09 | 1.80E-01 | 4.35E-06 | 2.73E-07 | 1.00E+00 | 3.49E-04 |
| phe.Fasting_rs114334325 S7  | AP3M2 | rs2980272 S7   | ZC3H3       | 4.92E-09 | 2.01E-01 | 4.82E-06 | 5.49E-07 | 1.00E+00 | 6.52E-04 |
| phe.Fasting_rs114334325 S7  | AP3M2 | rs2980275 S5   | ZC3H3       | 4.41E-09 | 1.80E-01 | 4.35E-06 | 4.45E-07 | 1.00E+00 | 5.38E-04 |
| phe.Fasting_rs114334325 S7  | AP3M2 | rs366767 S5    | ZC3H3       | 8.73E-09 | 3.56E-01 | 8.25E-06 | 3.06E-07 | 1.00E+00 | 3.86E-04 |
| phe.Fasting_rs114334325 S7  | AP3M2 | rs73283603 S7  | ZWINT       | 9.00E-13 | 3.68E-05 | 1.86E-09 | 2.55E-06 | 1.00E+00 | 2.54E-03 |
| phe.Fasting_rs114334325 S7  | AP3M2 | rs73392640 S8  | POLR3B      | 9.66E-15 | 3.94E-07 | 2.46E-11 | 5.32E-08 | 1.00E+00 | 8.11E-05 |
| phe.Fasting_rs114334325 S7  | AP3M2 | rs73619637 S8  | NA          | 3.31E-14 | 1.35E-06 | 8.02E-11 | 5.78E-11 | 2.35E-03 | 1.85E-07 |
| phe.Fasting_rs114334325 S7  | AP3M2 | rs74627895 S8  | TMEM64      | 3.67E-16 | 1.50E-08 | 1.20E-12 | 2.74E-07 | 1.00E+00 | 3.50E-04 |
| phe.Fasting_rs114334325 S7  | AP3M2 | rs75949566 S5  | TMEM64      | 1.70E-15 | 6.95E-08 | 4.87E-12 | 1.63E-06 | 1.00E+00 | 1.72E-03 |
| phe.Fasting_rs114334325 S7  | AP3M2 | rs78990344 S2  | LOC10050631 | 1.38E-15 | 5.65E-08 | 3.99E-12 | 1.33E-06 | 1.00E+00 | 1.46E-03 |
| phe.Fasting_rs114334325 S7  | AP3M2 | rs8075478 S8   | MYH10       | 3.01E-10 | 1.23E-02 | 3.60E-07 | 1.26E-06 | 1.00E+00 | 1.38E-03 |
| phe.Fasting_rs114394395 S7  | AP3M2 | rs111576333 S5 | TMEM64      | 1.48E-15 | 6.06E-08 | 4.25E-12 | 6.72E-08 | 1.00E+00 | 1.00E-04 |
| phe.Fasting_rs114394395 S7  | AP3M2 | rs112091318 S5 | TMEM64      | 3.97E-16 | 1.62E-08 | 1.29E-12 | 3.09E-08 | 1.00E+00 | 4.98E-05 |
| phe.Fasting_rs114394395 S7  | AP3M2 | rs11989304 S4  | TMEM64      | 1.48E-15 | 6.06E-08 | 4.25E-12 | 1.33E-06 | 1.00E+00 | 1.46E-03 |
| phe.Fasting_rs114394395 S7  | AP3M2 | rs141926074 S8 | ATE1        | 5.58E-17 | 2.28E-09 | 2.68E-13 | 3.83E-08 | 1.00E+00 | 6.03E-05 |
| phe.Fasting_rs114394395 S7  | AP3M2 | rs1470889 S5   | ZC3H3       | 4.61E-09 | 0.188265 | 4.53E-06 | 4.45E-07 | 1.00E+00 | 5.38E-04 |
| phe.Fasting_rs114394395 S7  | AP3M2 | rs1470890 S5   | ZC3H3       | 4.61E-09 | 0.188265 | 4.53E-06 | 4.45E-07 | 1.00E+00 | 5.38E-04 |
| phe.Fasting_rs114394395 S7  | AP3M2 | rs2924507 S5   | ZC3H3       | 4.61E-09 | 1.88E-01 | 4.53E-06 | 4.45E-07 | 1.00E+00 | 5.38E-04 |
| phe.Fasting_rs114394395 S7  | AP3M2 | rs2924508 S8   | ZC3H3       | 4.61E-09 | 1.88E-01 | 4.53E-06 | 1.22E-08 | 4.96E-01 | 2.22E-05 |
| phe.Fasting_rs114394395 S7  | AP3M2 | rs2924511 S7   | ZC3H3       | 4.61E-09 | 1.88E-01 | 4.53E-06 | 3.96E-07 | 1.00E+00 | 4.84E-04 |
| phe.Fasting_rs114394395 S7  | AP3M2 | rs2924512 S7   | ZC3H3       | 5.14E-09 | 0.209826 | 5.02E-06 | 5.18E-07 | 1.00E+00 | 6.17E-04 |
| phe.Fasting_rs114394395 S7  | AP3M2 | rs2956376 S8   | ZC3H3       | 4.61E-09 | 0.188265 | 4.53E-06 | 2.73E-07 | 1.00E+00 | 3.49E-04 |
| phe.Fasting_rs114394395 S7  | AP3M2 | rs2980270 S7   | ZC3H3       | 4.61E-09 | 0.188265 | 4.53E-06 | 2.73E-07 | 1.00E+00 | 3.49E-04 |
| phe.Fasting_rs114394395 S7  | AP3M2 | rs2980272 S7   | ZC3H3       | 5.14E-09 | 0.209826 | 5.02E-06 | 5.49E-07 | 1.00E+00 | 6.52E-04 |
| phe.Fasting_rs114394395 S7  | AP3M2 | rs2980275 S5   | ZC3H3       | 4.61E-09 | 0.188265 | 4.53E-06 | 4.45E-07 | 1.00E+00 | 5.38E-04 |
| phe.Fasting_rs114394395 S7  | AP3M2 | rs366767 S5    | ZC3H3       | 9.11E-09 | 0.371924 | 8.57E-06 | 3.06E-07 | 1.00E+00 | 3.86E-04 |
| phe.Fasting_rs114394395 S7  | AP3M2 | rs73283603 S7  | ZWINT       | 9.59E-13 | 3.92E-05 | 1.98E-09 | 2.55E-06 | 1.00E+00 | 2.54E-03 |
| phe.Fasting_rs114394395 S7  | AP3M2 | rs73392640 S8  | POLR3B      | 1.03E-14 | 4.20E-07 | 2.62E-11 | 5.32E-08 | 1.00E+00 | 8.11E-05 |

|              |                 |       |                 |             |          |           |             |          |          |          |
|--------------|-----------------|-------|-----------------|-------------|----------|-----------|-------------|----------|----------|----------|
| phe.Fasting_ | rs114394395 S7  | AP3M2 | rs73619637 S8   | NA          | 3.53E-14 | 1.44E-06  | 8.53E-11    | 5.78E-11 | 2.35E-03 | 1.85E-07 |
| phe.Fasting_ | rs114394395 S7  | AP3M2 | rs74627895 S8   | TMEM64      | 3.97E-16 | 1.62E-08  | 1.29E-12    | 2.74E-07 | 1.00E+00 | 3.50E-04 |
| phe.Fasting_ | rs114394395 S7  | AP3M2 | rs75949566 S5   | TMEM64      | 1.83E-15 | 7.46E-08  | 5.21E-12    | 1.63E-06 | 1.00E+00 | 1.72E-03 |
| phe.Fasting_ | rs114394395 S7  | AP3M2 | rs78990344 S2   | LOC1005063  | 1.48E-15 | 6.06E-08  | 4.25E-12    | 1.33E-06 | 1.00E+00 | 1.46E-03 |
| phe.Fasting_ | rs114394395 S7  | AP3M2 | rs8075478 S8    | MYH10       | 3.10E-10 | 0.0126417 | 3.68E-07    | 1.26E-06 | 1.00E+00 | 1.38E-03 |
| phe.Fasting_ | rs114464250 S24 | NA    | rs116548615 S8  | TMEM45B     | 1.58E-06 | 1         | 0.000912741 | 2.64E-08 | 1.00E+00 | 4.33E-05 |
| phe.Fasting_ | rs114464250 S24 | NA    | rs75374128 S5   | CNTLN       | 3.21E-08 | 1         | 2.74E-05    | 4.38E-07 | 1.00E+00 | 5.30E-04 |
| phe.Fasting_ | rs114464250 S24 | NA    | rs75864203 S8   | CNTLN       | 3.21E-08 | 1.00E+00  | 2.74E-05    | 4.38E-07 | 1.00E+00 | 5.30E-04 |
| phe.Fasting_ | rs114464250 S24 | NA    | rs76844308 S8   | CNTLN       | 2.15E-11 | 8.79E-04  | 3.18E-08    | 7.32E-07 | 1.00E+00 | 8.50E-04 |
| phe.Fasting_ | rs114464250 S24 | NA    | rs78722272 S5   | CNTLN       | 3.21E-08 | 1.00E+00  | 2.74E-05    | 4.56E-07 | 1.00E+00 | 5.49E-04 |
| phe.Fasting_ | rs114465622 S23 | HLA-G | rs114764631 S23 | NA          | 2.82E-07 | 1.00E+00  | 1.96E-04    | 4.13E-09 | 1.68E-01 | 8.45E-06 |
| phe.Fasting_ | rs114465622 S23 | HLA-G | rs139070959 S8  | RPN2        | 1.85E-09 | 7.55E-02  | 1.94E-06    | 2.41E-06 | 1.00E+00 | 2.43E-03 |
| phe.Fasting_ | rs114465622 S23 | HLA-G | rs145412529 S8  | "RBL1,RPS3A | 1.03E-09 | 4.21E-02  | 1.13E-06    | 2.51E-06 | 1.00E+00 | 2.51E-03 |
| phe.Fasting_ | rs114565620 S8  | RCL1  | rs112009962 S8  | NA          | 6.93E-06 | 1.00E+00  | 3.33E-03    | 1.37E-15 | 5.56E-08 | 1.54E-11 |
| phe.Fasting_ | rs114565620 S8  | RCL1  | rs112089881 S8  | ZFAND4      | 9.81E-19 | 4.01E-11  | 2.92E-14    | 8.31E-10 | 3.38E-02 | 2.02E-06 |
| phe.Fasting_ | rs114565620 S8  | RCL1  | rs115083290 S19 | NA          | 2.89E-17 | 1.18E-09  | 1.66E-13    | 3.20E-14 | 1.30E-06 | 2.35E-10 |
| phe.Fasting_ | rs114565620 S8  | RCL1  | rs115752779 S19 | NA          | 2.89E-17 | 1.18E-09  | 1.66E-13    | 3.20E-14 | 1.30E-06 | 2.35E-10 |
| phe.Fasting_ | rs114565620 S8  | RCL1  | rs12581352 S2   | NA          | 1.21E-05 | 1         | 0.00539647  | 1.49E-15 | 6.06E-08 | 1.66E-11 |
| phe.Fasting_ | rs114565620 S8  | RCL1  | rs139070959 S8  | RPN2        | 5.03E-18 | 2.06E-10  | 6.86E-14    | 9.04E-15 | 3.68E-07 | 7.90E-11 |
| phe.Fasting_ | rs114565620 S8  | RCL1  | rs141926074 S8  | ATE1        | 5.29E-19 | 2.16E-11  | 2.49E-14    | 9.87E-09 | 4.02E-01 | 1.84E-05 |
| phe.Fasting_ | rs114565620 S8  | RCL1  | rs145412529 S8  | "RBL1,RPS3A | 2.94E-18 | 1.20E-10  | 5.06E-14    | 1.03E-14 | 4.19E-07 | 8.92E-11 |
| phe.Fasting_ | rs114565620 S8  | RCL1  | rs2153597 S8    | ZNF438      | 1.03E-11 | 4.20E-04  | 1.63E-08    | 3.10E-10 | 1.26E-02 | 8.36E-07 |
| phe.Fasting_ | rs114565620 S8  | RCL1  | rs56398234 S8   | LRCH1       | 1.31E-05 | 1.00E+00  | 5.77E-03    | 8.26E-07 | 1.00E+00 | 9.48E-04 |
| phe.Fasting_ | rs114565620 S8  | RCL1  | rs57503635 S3   | NA          | 4.19E-17 | 1.71E-09  | 2.22E-13    | 1.28E-21 | 5.23E-14 | 4.02E-15 |
| phe.Fasting_ | rs114565620 S8  | RCL1  | rs7256517 S7    | CYTH2       | 1.74E-16 | 7.10E-09  | 6.18E-13    | 1.53E-07 | 1.00E+00 | 2.08E-04 |
| phe.Fasting_ | rs114565620 S8  | RCL1  | rs73283603 S7   | ZWINT       | 5.69E-17 | 2.32E-09  | 2.72E-13    | 5.34E-07 | 1.00E+00 | 6.35E-04 |
| phe.Fasting_ | rs114565620 S8  | RCL1  | rs73392640 S8   | POLR3B      | 1.04E-07 | 1.00E+00  | 7.92E-05    | 9.18E-08 | 1.00E+00 | 1.31E-04 |
| phe.Fasting_ | rs114565620 S8  | RCL1  | rs73619637 S8   | NA          | 5.38E-17 | 2.20E-09  | 2.63E-13    | 4.57E-11 | 1.86E-03 | 1.49E-07 |
| phe.Fasting_ | rs114565620 S8  | RCL1  | rs75374128 S5   | CNTLN       | 2.86E-18 | 1.17E-10  | 4.97E-14    | 1.17E-09 | 4.77E-02 | 2.75E-06 |
| phe.Fasting_ | rs114565620 S8  | RCL1  | rs75506779 S5   | TMCO3       | 1.24E-07 | 1         | 9.24E-05    | 2.68E-06 | 1.00E+00 | 2.65E-03 |
| phe.Fasting_ | rs114565620 S8  | RCL1  | rs75864203 S8   | CNTLN       | 2.86E-18 | 1.17E-10  | 4.97E-14    | 1.17E-09 | 4.77E-02 | 2.75E-06 |
| phe.Fasting_ | rs114565620 S8  | RCL1  | rs76844308 S8   | CNTLN       | 5.35E-18 | 2.19E-10  | 7.01E-14    | 8.63E-10 | 3.51E-02 | 2.08E-06 |
| phe.Fasting_ | rs114565620 S8  | RCL1  | rs78722272 S5   | CNTLN       | 2.86E-18 | 1.17E-10  | 4.97E-14    | 1.24E-09 | 5.05E-02 | 2.89E-06 |
| phe.Fasting_ | rs114676355 S24 | HLA-G | rs114764631 S23 | NA          | 2.82E-07 | 1         | 0.000195724 | 4.13E-09 | 1.68E-01 | 8.45E-06 |
| phe.Fasting_ | rs114676355 S24 | HLA-G | rs139070959 S8  | RPN2        | 1.85E-09 | 0.0755239 | 1.94E-06    | 2.41E-06 | 1.00E+00 | 2.43E-03 |
| phe.Fasting_ | rs114676355 S24 | HLA-G | rs145412529 S8  | "RBL1,RPS3A | 1.03E-09 | 0.0420988 | 1.13E-06    | 2.51E-06 | 1.00E+00 | 2.51E-03 |
| phe.Fasting_ | rs114764631 S23 | NA    | rs112009962 S8  | NA          | 2.59E-18 | 1.06E-10  | 4.63E-14    | 3.08E-15 | 1.25E-07 | 2.96E-11 |
| phe.Fasting_ | rs114764631 S23 | NA    | rs114032844 S21 | NA          | 1.96E-06 | 1         | 0.00110067  | 2.45E-15 | 9.99E-08 | 2.40E-11 |
| phe.Fasting_ | rs114764631 S23 | NA    | rs114565620 S8  | RCL1        | 9.76E-10 | 0.0398382 | 1.07E-06    | 8.07E-06 | 1.00E+00 | 6.83E-03 |
| phe.Fasting_ | rs114764631 S23 | NA    | rs114968018 S21 | NA          | 2.86E-06 | 1         | 0.00151722  | 2.61E-14 | 1.06E-06 | 1.98E-10 |



|                             |           |                 |             |          |            |             |          |          |          |
|-----------------------------|-----------|-----------------|-------------|----------|------------|-------------|----------|----------|----------|
| phe.Fasting_rs114764631 S23 | NA        | rs115083290 S19 | NA          | 2.20E-10 | 0.00900061 | 2.70E-07    | 5.29E-08 | 1.00E+00 | 8.08E-05 |
| phe.Fasting_rs114764631 S23 | NA        | rs115223560 S24 | NA          | 9.99E-06 | 1          | 0.00457303  | 8.13E-16 | 3.31E-08 | 1.16E-11 |
| phe.Fasting_rs114764631 S23 | NA        | rs115752779 S19 | NA          | 2.20E-10 | 0.00900061 | 2.70E-07    | 5.29E-08 | 1.00E+00 | 8.08E-05 |
| phe.Fasting_rs114764631 S23 | NA        | rs116681717 S8  | DTD2        | 1.55E-18 | 6.31E-11   | 3.60E-14    | 8.34E-06 | 1.00E+00 | 7.05E-03 |
| phe.Fasting_rs114764631 S23 | NA        | rs12581352 S2   | NA          | 3.05E-18 | 1.25E-10   | 5.24E-14    | 1.55E-15 | 6.32E-08 | 1.73E-11 |
| phe.Fasting_rs114764631 S23 | NA        | rs139070959 S8  | RPN2        | 2.06E-18 | 8.43E-11   | 4.20E-14    | 1.89E-09 | 7.70E-02 | 4.20E-06 |
| phe.Fasting_rs114764631 S23 | NA        | rs145412529 S8  | "RBL1,RPS3A | 1.18E-18 | 4.82E-11   | 3.16E-14    | 2.17E-09 | 8.85E-02 | 4.76E-06 |
| phe.Fasting_rs114764631 S23 | NA        | rs16908547 S8   | PAG1        | 9.77E-07 | 1          | 0.00059392  | 3.83E-14 | 1.56E-06 | 2.74E-10 |
| phe.Fasting_rs114764631 S23 | NA        | rs60011869 S16  | NA          | 4.55E-06 | 1          | 0.0022928   | 1.91E-15 | 7.77E-08 | 2.07E-11 |
| phe.Fasting_rs114764631 S23 | NA        | rs75350765 S5   | RCL1        | 9.76E-10 | 0.0398382  | 1.07E-06    | 8.07E-06 | 1.00E+00 | 6.83E-03 |
| phe.Fasting_rs114764631 S23 | NA        | rs7845181 S21   | NA          | 1.45E-05 | 1          | 0.00632191  | 9.80E-16 | 3.99E-08 | 1.17E-11 |
| phe.Fasting_rs115031102 S23 | LOC554223 | rs114764631 S23 | NA          | 1.40E-11 | 0.00057143 | 2.16E-08    | 6.53E-09 | 2.66E-01 | 1.26E-05 |
| phe.Fasting_rs115031102 S23 | LOC554223 | rs139070959 S8  | RPN2        | 2.83E-09 | 0.115681   | 2.90E-06    | 3.42E-06 | 1.00E+00 | 3.29E-03 |
| phe.Fasting_rs115031102 S23 | LOC554223 | rs145412529 S8  | "RBL1,RPS3A | 1.60E-09 | 0.0654976  | 1.70E-06    | 3.58E-06 | 1.00E+00 | 3.41E-03 |
| phe.Fasting_rs115083290 S19 | NA        | rs139070959 S8  | RPN2        | 2.80E-17 | 1.15E-09   | 1.64E-13    | 1.96E-12 | 7.97E-05 | 8.52E-09 |
| phe.Fasting_rs115083290 S19 | NA        | rs145412529 S8  | "RBL1,RPS3A | 1.67E-17 | 6.80E-10   | 1.26E-13    | 2.21E-12 | 9.01E-05 | 9.56E-09 |
| phe.Fasting_rs115083290 S19 | NA        | rs4820499 S10   | PAC3IN2     | 1.87E-14 | 7.63E-07   | 4.66E-11    | 9.81E-06 | 1.00E+00 | 8.02E-03 |
| phe.Fasting_rs115083290 S19 | NA        | rs56398234 S8   | LRCH1       | 1.37E-07 | 1          | 0.000101115 | 9.48E-08 | 1.00E+00 | 1.35E-04 |
| phe.Fasting_rs115083290 S19 | NA        | rs57503635 S3   | NA          | 2.42E-16 | 9.88E-09   | 8.21E-13    | 6.72E-14 | 2.74E-06 | 4.55E-10 |
| phe.Fasting_rs115083290 S19 | NA        | rs7511534 S12   | PAC3IN2     | 9.52E-15 | 3.89E-07   | 2.43E-11    | 1.15E-05 | 1.00E+00 | 9.10E-03 |
| phe.Fasting_rs115087242 S19 | NA        | rs114764631 S23 | NA          | 2.82E-07 | 1          | 0.000195724 | 4.13E-09 | 1.68E-01 | 8.44E-06 |
| phe.Fasting_rs115087242 S19 | NA        | rs139070959 S8  | RPN2        | 1.85E-09 | 0.0755239  | 1.94E-06    | 2.39E-06 | 1.00E+00 | 2.41E-03 |
| phe.Fasting_rs115087242 S19 | NA        | rs145412529 S8  | "RBL1,RPS3A | 1.03E-09 | 0.0420988  | 1.13E-06    | 2.48E-06 | 1.00E+00 | 2.48E-03 |
| phe.Fasting_rs115088919 S24 | NA        | rs114032844 S21 | NA          | 1.86E-06 | 1          | 0.00105574  | 1.44E-15 | 5.86E-08 | 1.61E-11 |
| phe.Fasting_rs115088919 S24 | NA        | rs114565620 S8  | RCL1        | 9.00E-10 | 0.0367522  | 9.91E-07    | 4.78E-06 | 1.00E+00 | 4.41E-03 |
| phe.Fasting_rs115088919 S24 | NA        | rs116681717 S8  | DTD2        | 1.30E-18 | 5.31E-11   | 3.28E-14    | 4.37E-06 | 1.00E+00 | 4.08E-03 |
| phe.Fasting_rs115088919 S24 | NA        | rs12581352 S2   | NA          | 2.60E-18 | 1.06E-10   | 4.65E-14    | 1.14E-11 | 4.63E-04 | 4.18E-08 |
| phe.Fasting_rs115088919 S24 | NA        | rs139070959 S8  | RPN2        | 1.70E-18 | 6.96E-11   | 3.69E-14    | 1.48E-08 | 6.01E-01 | 2.63E-05 |
| phe.Fasting_rs115088919 S24 | NA        | rs141072133 S8  | DTD2        | 9.08E-19 | 3.71E-11   | 2.78E-14    | 7.51E-06 | 1.00E+00 | 6.42E-03 |
| phe.Fasting_rs115088919 S24 | NA        | rs145412529 S8  | "RBL1,RPS3A | 9.72E-19 | 3.97E-11   | 2.92E-14    | 1.75E-07 | 1.00E+00 | 2.35E-04 |
| phe.Fasting_rs115088919 S24 | NA        | rs16908547 S8   | PAG1        | 1.11E-06 | 1          | 0.000663089 | 2.65E-09 | 1.08E-01 | 5.68E-06 |
| phe.Fasting_rs115088919 S24 | NA        | rs60011869 S16  | NA          | 4.21E-06 | 1          | 0.00213984  | 1.16E-15 | 4.71E-08 | 1.33E-11 |
| phe.Fasting_rs115088919 S24 | NA        | rs75350765 S5   | RCL1        | 9.00E-10 | 0.0367522  | 9.91E-07    | 4.78E-06 | 1.00E+00 | 4.41E-03 |
| phe.Fasting_rs115120603 S24 | HLA-G     | rs114764631 S23 | NA          | 2.82E-07 | 1          | 0.000195724 | 4.13E-09 | 1.68E-01 | 8.45E-06 |
| phe.Fasting_rs115120603 S24 | HLA-G     | rs139070959 S8  | RPN2        | 1.85E-09 | 0.0755239  | 1.94E-06    | 2.41E-06 | 1.00E+00 | 2.43E-03 |
| phe.Fasting_rs115120603 S24 | HLA-G     | rs145412529 S8  | "RBL1,RPS3A | 1.03E-09 | 0.0420988  | 1.13E-06    | 2.51E-06 | 1.00E+00 | 2.51E-03 |
| phe.Fasting_rs115223560 S24 | NA        | rs139070959 S8  | RPN2        | 1.41E-18 | 5.75E-11   | 3.43E-14    | 1.16E-08 | 4.71E-01 | 2.12E-05 |
| phe.Fasting_rs115223560 S24 | NA        | rs145412529 S8  | "RBL1,RPS3A | 7.95E-19 | 3.25E-11   | 2.70E-14    | 1.39E-08 | 5.67E-01 | 2.49E-05 |
| phe.Fasting_rs11524145 S5   | CDK6      | rs115305957 S23 | NA          | 2.70E-18 | 1.10E-10   | 4.80E-14    | 1.61E-08 | 6.56E-01 | 2.83E-05 |
| phe.Fasting_rs11524145 S5   | CDK6      | rs141926074 S8  | ATE1        | 1.78E-06 | 1.00E+00   | 1.01E-03    | 7.24E-06 | 1.00E+00 | 6.24E-03 |

|              |             |     |             |             |     |             |          |             |             |          |          |          |
|--------------|-------------|-----|-------------|-------------|-----|-------------|----------|-------------|-------------|----------|----------|----------|
| phe.Fasting_ | rs11524145  | S5  | CDK6        | rs74701059  | S24 | C17orf102   | 2.79E-18 | 1.14E-10    | 4.91E-14    | 1.98E-08 | 8.04E-01 | 3.39E-05 |
| phe.Fasting_ | rs11524145  | S5  | CDK6        | rs79703349  | S24 | C17orf102   | 2.79E-18 | 1.14E-10    | 4.91E-14    | 2.52E-08 | 1.00E+00 | 4.14E-05 |
| phe.Fasting_ | rs115554530 | S8  | ASNS        | rs115305957 | S23 | NA          | 8.91E-17 | 3.64E-09    | 3.86E-13    | 1.92E-06 | 1.00E+00 | 2.00E-03 |
| phe.Fasting_ | rs115554530 | S8  | ASNS        | rs74701059  | S24 | C17orf102   | 8.56E-17 | 3.50E-09    | 3.72E-13    | 2.26E-06 | 1.00E+00 | 2.30E-03 |
| phe.Fasting_ | rs115554530 | S8  | ASNS        | rs79703349  | S24 | C17orf102   | 8.56E-17 | 3.50E-09    | 3.72E-13    | 2.69E-06 | 1.00E+00 | 2.67E-03 |
| phe.Fasting_ | rs115583841 | S23 | "HCG4,LOC5! | rs114764631 | S23 | NA          | 1.40E-11 | 0.00057143  | 2.16E-08    | 6.53E-09 | 2.66E-01 | 1.26E-05 |
| phe.Fasting_ | rs115583841 | S23 | "HCG4,LOC5! | rs139070959 | S8  | RPN2        | 2.83E-09 | 0.115681    | 2.90E-06    | 3.42E-06 | 1.00E+00 | 3.29E-03 |
| phe.Fasting_ | rs115583841 | S23 | "HCG4,LOC5! | rs145412529 | S8  | "RBL1,RPS3A | 1.60E-09 | 0.0654976   | 1.70E-06    | 3.58E-06 | 1.00E+00 | 3.41E-03 |
| phe.Fasting_ | rs115586038 | S5  | MICA        | rs112009962 | S8  | NA          | 4.72E-07 | 1           | 3.11E-04    | 1.65E-07 | 1.00E+00 | 2.22E-04 |
| phe.Fasting_ | rs115586038 | S5  | MICA        | rs112348319 | S8  | SPTLC1      | 1.10E-06 | 1           | 0.000660514 | 7.81E-07 | 1.00E+00 | 9.01E-04 |
| phe.Fasting_ | rs115586038 | S5  | MICA        | rs112608164 | S8  | SPTLC1      | 1.10E-06 | 1           | 0.000660514 | 7.81E-07 | 1.00E+00 | 9.01E-04 |
| phe.Fasting_ | rs115586038 | S5  | MICA        | rs113568654 | S12 | SPTLC1      | 1.06E-06 | 1           | 0.000635659 | 3.59E-06 | 1.00E+00 | 3.42E-03 |
| phe.Fasting_ | rs115586038 | S5  | MICA        | rs114032844 | S21 | NA          | 1.55E-08 | 0.633389    | 1.40E-05    | 1.84E-07 | 1.00E+00 | 2.47E-04 |
| phe.Fasting_ | rs115586038 | S5  | MICA        | rs114565620 | S8  | RCL1        | 2.31E-05 | 1.00E+00    | 9.45E-03    | 1.60E-06 | 1.00E+00 | 1.70E-03 |
| phe.Fasting_ | rs115586038 | S5  | MICA        | rs114968018 | S21 | NA          | 1.90E-08 | 0.775362    | 1.68E-05    | 4.92E-15 | 2.00E-07 | 4.56E-11 |
| phe.Fasting_ | rs115586038 | S5  | MICA        | rs12581352  | S2  | NA          | 5.48E-07 | 1.00E+00    | 3.57E-04    | 2.84E-08 | 1.00E+00 | 4.64E-05 |
| phe.Fasting_ | rs115586038 | S5  | MICA        | rs139070959 | S8  | RPN2        | 1.80E-07 | 1.00E+00    | 1.29E-04    | 1.14E-05 | 1.00E+00 | 9.04E-03 |
| phe.Fasting_ | rs115586038 | S5  | MICA        | rs145412529 | S8  | "RBL1,RPS3A | 1.05E-07 | 1.00E+00    | 7.96E-05    | 1.25E-05 | 1.00E+00 | 9.72E-03 |
| phe.Fasting_ | rs115586038 | S5  | MICA        | rs75350765  | S5  | RCL1        | 2.31E-05 | 1           | 0.00945364  | 1.60E-06 | 1.00E+00 | 1.70E-03 |
| phe.Fasting_ | rs115586038 | S5  | MICA        | rs75374128  | S5  | CNTLN       | 3.56E-06 | 1           | 0.00183843  | 7.27E-08 | 1.00E+00 | 1.07E-04 |
| phe.Fasting_ | rs115586038 | S5  | MICA        | rs75864203  | S8  | CNTLN       | 3.56E-06 | 1           | 1.84E-03    | 7.27E-08 | 1.00E+00 | 1.07E-04 |
| phe.Fasting_ | rs115586038 | S5  | MICA        | rs76542405  | S5  | SPTLC1      | 1.10E-06 | 1           | 6.61E-04    | 7.81E-07 | 1.00E+00 | 9.01E-04 |
| phe.Fasting_ | rs115586038 | S5  | MICA        | rs76844308  | S8  | CNTLN       | 1.69E-06 | 1.00E+00    | 9.68E-04    | 8.06E-08 | 1.00E+00 | 1.17E-04 |
| phe.Fasting_ | rs115586038 | S5  | MICA        | rs77523818  | S7  | SPTLC1      | 1.10E-06 | 1.00E+00    | 6.61E-04    | 7.81E-07 | 1.00E+00 | 9.01E-04 |
| phe.Fasting_ | rs115586038 | S5  | MICA        | rs78722272  | S5  | CNTLN       | 3.56E-06 | 1.00E+00    | 1.84E-03    | 7.56E-08 | 1.00E+00 | 1.10E-04 |
| phe.Fasting_ | rs115688876 | S24 | LOC554223   | rs114764631 | S23 | NA          | 2.82E-07 | 1           | 0.000195724 | 3.92E-09 | 1.60E-01 | 8.06E-06 |
| phe.Fasting_ | rs115688876 | S24 | LOC554223   | rs139070959 | S8  | RPN2        | 1.85E-09 | 0.0755239   | 1.94E-06    | 2.29E-06 | 1.00E+00 | 2.33E-03 |
| phe.Fasting_ | rs115688876 | S24 | LOC554223   | rs145412529 | S8  | "RBL1,RPS3A | 1.03E-09 | 0.0420988   | 1.13E-06    | 2.38E-06 | 1.00E+00 | 2.40E-03 |
| phe.Fasting_ | rs115752779 | S19 | NA          | rs139070959 | S8  | RPN2        | 2.80E-17 | 1.15E-09    | 1.64E-13    | 1.96E-12 | 7.97E-05 | 8.52E-09 |
| phe.Fasting_ | rs115752779 | S19 | NA          | rs145412529 | S8  | "RBL1,RPS3A | 1.67E-17 | 6.80E-10    | 1.26E-13    | 2.21E-12 | 9.01E-05 | 9.56E-09 |
| phe.Fasting_ | rs115752779 | S19 | NA          | rs4820499   | S10 | PAC3IN2     | 1.87E-14 | 7.63E-07    | 4.66E-11    | 9.81E-06 | 1.00E+00 | 8.02E-03 |
| phe.Fasting_ | rs115752779 | S19 | NA          | rs56398234  | S8  | LRCH1       | 1.37E-07 | 1           | 0.000101115 | 9.48E-08 | 1.00E+00 | 1.35E-04 |
| phe.Fasting_ | rs115752779 | S19 | NA          | rs57503635  | S3  | NA          | 2.42E-16 | 9.88E-09    | 8.21E-13    | 6.72E-14 | 2.74E-06 | 4.55E-10 |
| phe.Fasting_ | rs115752779 | S19 | NA          | rs7511534   | S12 | PAC3IN2     | 9.52E-15 | 3.89E-07    | 2.43E-11    | 1.15E-05 | 1.00E+00 | 9.10E-03 |
| phe.Fasting_ | rs115787552 | S5  | KPNA3       | rs140524622 | S7  | MRPL10      | 3.78E-08 | 1           | 3.18E-05    | 1.56E-16 | 6.34E-09 | 6.88E-12 |
| phe.Fasting_ | rs115787552 | S5  | KPNA3       | rs57503635  | S3  | NA          | 1.29E-15 | 5.25E-08    | 3.74E-12    | 4.33E-15 | 1.76E-07 | 4.03E-11 |
| phe.Fasting_ | rs115787552 | S5  | KPNA3       | rs7256517   | S7  | CYTH2       | 1.78E-05 | 1           | 0.00753655  | 1.17E-06 | 1.00E+00 | 1.30E-03 |
| phe.Fasting_ | rs115787552 | S5  | KPNA3       | rs75506779  | S5  | TMCO3       | 2.52E-06 | 1           | 0.00136748  | 2.54E-15 | 1.03E-07 | 2.48E-11 |
| phe.Fasting_ | rs115868643 | S23 | LOC554223   | rs114764631 | S23 | NA          | 8.80E-12 | 0.000359291 | 1.46E-08    | 6.52E-09 | 2.65E-01 | 1.26E-05 |
| phe.Fasting_ | rs115868643 | S23 | LOC554223   | rs139070959 | S8  | RPN2        | 1.87E-09 | 0.0761727   | 1.96E-06    | 3.41E-06 | 1.00E+00 | 3.28E-03 |

|                             |           |                 |             |          |             |             |          |          |          |
|-----------------------------|-----------|-----------------|-------------|----------|-------------|-------------|----------|----------|----------|
| phe.Fasting_rs115868643 S23 | LOC554223 | rs145412529 S8  | "RBL1,RPS3A | 1.05E-09 | 0.0427011   | 1.14E-06    | 3.56E-06 | 1.00E+00 | 3.40E-03 |
| phe.Fasting_rs11586977 S24  | ALPL      | rs73392640 S8   | POLR3B      | 4.16E-06 | 1           | 0.00211971  | 3.12E-08 | 1.00E+00 | 5.01E-05 |
| phe.Fasting_rs11587694 S5   | LUZP1     | rs112348319 S8  | SPTLC1      | 4.50E-06 | 1           | 0.00227012  | 3.81E-07 | 1.00E+00 | 4.70E-04 |
| phe.Fasting_rs11587694 S5   | LUZP1     | rs112608164 S8  | SPTLC1      | 4.50E-06 | 1           | 0.00227012  | 3.81E-07 | 1.00E+00 | 4.70E-04 |
| phe.Fasting_rs11587694 S5   | LUZP1     | rs113568654 S12 | SPTLC1      | 4.19E-06 | 1           | 0.002133    | 2.88E-06 | 1.00E+00 | 2.82E-03 |
| phe.Fasting_rs11587694 S5   | LUZP1     | rs76542405 S5   | SPTLC1      | 4.50E-06 | 1           | 0.00227012  | 3.81E-07 | 1.00E+00 | 4.70E-04 |
| phe.Fasting_rs11587694 S5   | LUZP1     | rs77523818 S7   | SPTLC1      | 4.50E-06 | 1           | 0.00227012  | 3.81E-07 | 1.00E+00 | 4.70E-04 |
| phe.Fasting_rs115888477 S8  | NA        | rs140524622 S7  | MRPL10      | 1.98E-07 | 1           | 0.000140985 | 1.60E-16 | 6.53E-09 | 6.90E-12 |
| phe.Fasting_rs115888477 S8  | NA        | rs57503635 S3   | NA          | 8.77E-15 | 3.58E-07    | 2.24E-11    | 7.79E-16 | 3.17E-08 | 1.16E-11 |
| phe.Fasting_rs115888477 S8  | NA        | rs7256517 S7    | CYTH2       | 2.35E-14 | 9.59E-07    | 5.79E-11    | 1.77E-07 | 1.00E+00 | 2.38E-04 |
| phe.Fasting_rs115888477 S8  | NA        | rs73619637 S8   | NA          | 1.18E-14 | 4.80E-07    | 2.99E-11    | 4.77E-06 | 1.00E+00 | 4.40E-03 |
| phe.Fasting_rs115888477 S8  | NA        | rs75506779 S5   | TMCO3       | 1.13E-15 | 4.60E-08    | 3.30E-12    | 3.86E-16 | 1.57E-08 | 1.16E-11 |
| phe.Fasting_rs115924449 S23 | HLA-G     | rs114764631 S23 | NA          | 2.82E-07 | 1           | 0.000195724 | 4.13E-09 | 1.68E-01 | 8.45E-06 |
| phe.Fasting_rs115924449 S23 | HLA-G     | rs139070959 S8  | RPN2        | 1.85E-09 | 0.0755239   | 1.94E-06    | 2.41E-06 | 1.00E+00 | 2.43E-03 |
| phe.Fasting_rs115924449 S23 | HLA-G     | rs145412529 S8  | "RBL1,RPS3A | 1.03E-09 | 0.0420988   | 1.13E-06    | 2.51E-06 | 1.00E+00 | 2.51E-03 |
| phe.Fasting_rs115967895 S6  | MICA      | rs112009962 S8  | NA          | 8.91E-08 | 1           | 6.88E-05    | 7.86E-07 | 1.00E+00 | 9.06E-04 |
| phe.Fasting_rs115967895 S6  | MICA      | rs113568654 S12 | SPTLC1      | 8.16E-11 | 0.00333254  | 1.08E-07    | 1.06E-06 | 1.00E+00 | 1.19E-03 |
| phe.Fasting_rs115967895 S6  | MICA      | rs115554530 S8  | ASNS        | 1.41E-12 | 5.74E-05    | 2.76E-09    | 9.29E-06 | 1.00E+00 | 7.68E-03 |
| phe.Fasting_rs115967895 S6  | MICA      | rs12581352 S2   | NA          | 4.69E-09 | 0.191622    | 4.61E-06    | 3.87E-07 | 1.00E+00 | 4.75E-04 |
| phe.Fasting_rs116011837 S9  | BRD2      | rs112089881 S8  | ZFAND4      | 2.75E-18 | 1.12E-10    | 4.87E-14    | 2.89E-17 | 1.18E-09 | 2.81E-12 |
| phe.Fasting_rs116011837 S9  | BRD2      | rs112348319 S8  | SPTLC1      | 9.09E-14 | 3.71E-06    | 2.08E-10    | 4.63E-11 | 1.89E-03 | 1.51E-07 |
| phe.Fasting_rs116011837 S9  | BRD2      | rs112608164 S8  | SPTLC1      | 9.09E-14 | 3.71E-06    | 2.08E-10    | 4.63E-11 | 1.89E-03 | 1.51E-07 |
| phe.Fasting_rs116011837 S9  | BRD2      | rs113568654 S12 | SPTLC1      | 7.73E-14 | 3.16E-06    | 1.78E-10    | 2.81E-10 | 1.14E-02 | 7.68E-07 |
| phe.Fasting_rs116011837 S9  | BRD2      | rs114334325 S7  | AP3M2       | 5.95E-16 | 2.43E-08    | 1.84E-12    | 7.47E-14 | 3.04E-06 | 5.01E-10 |
| phe.Fasting_rs116011837 S9  | BRD2      | rs114394395 S7  | AP3M2       | 6.40E-16 | 2.61E-08    | 1.97E-12    | 7.47E-14 | 3.04E-06 | 5.01E-10 |
| phe.Fasting_rs116011837 S9  | BRD2      | rs114565620 S8  | RCL1        | 1.29E-17 | 5.27E-10    | 1.08E-13    | 2.80E-12 | 1.14E-04 | 1.19E-08 |
| phe.Fasting_rs116011837 S9  | BRD2      | rs115083290 S19 | NA          | 7.17E-17 | 2.93E-09    | 3.22E-13    | 1.49E-08 | 6.07E-01 | 2.65E-05 |
| phe.Fasting_rs116011837 S9  | BRD2      | rs115305957 S23 | NA          | 6.33E-14 | 2.59E-06    | 1.47E-10    | 5.30E-07 | 1.00E+00 | 6.31E-04 |
| phe.Fasting_rs116011837 S9  | BRD2      | rs115752779 S19 | NA          | 7.17E-17 | 2.93E-09    | 3.22E-13    | 1.49E-08 | 6.07E-01 | 2.65E-05 |
| phe.Fasting_rs116011837 S9  | BRD2      | rs115787552 S5  | KPNA3       | 6.47E-12 | 0.000264296 | 1.13E-08    | 5.11E-15 | 2.08E-07 | 4.70E-11 |
| phe.Fasting_rs116011837 S9  | BRD2      | rs115888477 S8  | NA          | 2.63E-11 | 0.00107232  | 3.78E-08    | 1.14E-15 | 4.64E-08 | 1.31E-11 |
| phe.Fasting_rs116011837 S9  | BRD2      | rs116079984 S8  | KPNA3       | 6.47E-12 | 0.000264296 | 1.13E-08    | 8.10E-15 | 3.30E-07 | 7.15E-11 |
| phe.Fasting_rs116011837 S9  | BRD2      | rs11612419 S8   | NRIP2       | 3.68E-06 | 1.00E+00    | 1.90E-03    | 8.64E-06 | 1.00E+00 | 7.24E-03 |
| phe.Fasting_rs116011837 S9  | BRD2      | rs116406581 S2  | NA          | 2.60E-15 | 1.06E-07    | 7.29E-12    | 4.98E-14 | 2.03E-06 | 3.45E-10 |
| phe.Fasting_rs116011837 S9  | BRD2      | rs116548615 S8  | TMEM45B     | 2.55E-17 | 1.04E-09    | 1.58E-13    | 2.14E-12 | 8.73E-05 | 9.31E-09 |
| phe.Fasting_rs116011837 S9  | BRD2      | rs116696844 S3  | AP3M2       | 9.71E-16 | 3.96E-08    | 2.89E-12    | 7.47E-14 | 3.04E-06 | 5.01E-10 |
| phe.Fasting_rs116011837 S9  | BRD2      | rs140524622 S7  | MRPL10      | 1.84E-06 | 1.00E+00    | 1.04E-03    | 1.09E-10 | 4.44E-03 | 3.32E-07 |
| phe.Fasting_rs116011837 S9  | BRD2      | rs141926074 S8  | ATE1        | 4.36E-18 | 1.78E-10    | 6.36E-14    | 8.52E-14 | 3.47E-06 | 5.69E-10 |
| phe.Fasting_rs116011837 S9  | BRD2      | rs146815317 S5  | KPNA3       | 6.47E-12 | 2.64E-04    | 1.13E-08    | 5.11E-15 | 2.08E-07 | 4.70E-11 |
| phe.Fasting_rs116011837 S9  | BRD2      | rs150117838 S8  | KPNA3       | 6.47E-12 | 2.64E-04    | 1.13E-08    | 6.64E-15 | 2.70E-07 | 5.95E-11 |

|                            |       |             |     |             |          |             |            |          |          |          |
|----------------------------|-------|-------------|-----|-------------|----------|-------------|------------|----------|----------|----------|
| phe.Fasting_rs116011837S9  | BRD2  | rs16908547  | S8  | PAG1        | 1.95E-10 | 7.98E-03    | 2.41E-07   | 4.34E-10 | 1.77E-02 | 1.14E-06 |
| phe.Fasting_rs116011837S9  | BRD2  | rs16929995  | S8  | NRIP2       | 3.26E-06 | 1           | 0.00170342 | 8.67E-06 | 1.00E+00 | 7.26E-03 |
| phe.Fasting_rs116011837S9  | BRD2  | rs366767    | S5  | ZC3H3       | 1.08E-13 | 4.41E-06    | 2.45E-10   | 9.53E-13 | 3.88E-05 | 4.53E-09 |
| phe.Fasting_rs116011837S9  | BRD2  | rs57503635  | S3  | NA          | 1.10E-16 | 4.48E-09    | 4.61E-13   | 3.70E-08 | 1.00E+00 | 5.84E-05 |
| phe.Fasting_rs116011837S9  | BRD2  | rs60011869  | S16 | NA          | 8.30E-12 | 3.39E-04    | 1.38E-08   | 4.47E-10 | 1.82E-02 | 1.17E-06 |
| phe.Fasting_rs116011837S9  | BRD2  | rs7004597   | S8  | NA          | 5.95E-16 | 2.43E-08    | 1.84E-12   | 4.49E-14 | 1.83E-06 | 3.12E-10 |
| phe.Fasting_rs116011837S9  | BRD2  | rs7256517   | S7  | CYTH2       | 2.03E-16 | 8.29E-09    | 7.05E-13   | 1.06E-09 | 4.30E-02 | 2.50E-06 |
| phe.Fasting_rs116011837S9  | BRD2  | rs7307516   | S8  | NRIP2       | 3.50E-06 | 1           | 0.00181368 | 8.55E-06 | 1.00E+00 | 7.17E-03 |
| phe.Fasting_rs116011837S9  | BRD2  | rs73619637  | S8  | NA          | 5.81E-06 | 1           | 0.00284598 | 1.82E-12 | 7.40E-05 | 7.96E-09 |
| phe.Fasting_rs116011837S9  | BRD2  | rs74701059  | S24 | C17orf102   | 5.18E-14 | 2.12E-06    | 1.22E-10   | 2.10E-08 | 8.56E-01 | 3.59E-05 |
| phe.Fasting_rs116011837S9  | BRD2  | rs74914207  | S24 | NA          | 8.13E-10 | 0.0331811   | 9.00E-07   | 3.61E-08 | 1.00E+00 | 5.73E-05 |
| phe.Fasting_rs116011837S9  | BRD2  | rs75350765  | S5  | RCL1        | 1.29E-17 | 5.27E-10    | 1.08E-13   | 2.80E-12 | 1.14E-04 | 1.19E-08 |
| phe.Fasting_rs116011837S9  | BRD2  | rs75374128  | S5  | CNTLN       | 1.61E-13 | 6.59E-06    | 3.62E-10   | 5.08E-06 | 1.00E+00 | 4.63E-03 |
| phe.Fasting_rs116011837S9  | BRD2  | rs75506779  | S5  | TMCO3       | 3.56E-12 | 0.000145372 | 6.43E-09   | 2.91E-08 | 1.00E+00 | 4.74E-05 |
| phe.Fasting_rs116011837S9  | BRD2  | rs75758702  | S24 | NA          | 1.02E-17 | 4.19E-10    | 9.80E-14   | 4.31E-10 | 1.75E-02 | 1.13E-06 |
| phe.Fasting_rs116011837S9  | BRD2  | rs75864203  | S8  | CNTLN       | 1.61E-13 | 6.59E-06    | 3.62E-10   | 5.08E-06 | 1.00E+00 | 4.63E-03 |
| phe.Fasting_rs116011837S9  | BRD2  | rs76542405  | S5  | SPTLC1      | 9.09E-14 | 3.71E-06    | 2.08E-10   | 4.63E-11 | 1.89E-03 | 1.51E-07 |
| phe.Fasting_rs116011837S9  | BRD2  | rs76844308  | S8  | CNTLN       | 6.35E-14 | 2.59E-06    | 1.48E-10   | 5.33E-06 | 1.00E+00 | 4.84E-03 |
| phe.Fasting_rs116011837S9  | BRD2  | rs77523818  | S7  | SPTLC1      | 9.09E-14 | 3.71E-06    | 2.08E-10   | 4.63E-11 | 1.89E-03 | 1.51E-07 |
| phe.Fasting_rs116011837S9  | BRD2  | rs77798597  | S7  | KPNA3       | 6.47E-12 | 0.000264296 | 1.13E-08   | 6.64E-15 | 2.70E-07 | 5.95E-11 |
| phe.Fasting_rs116011837S9  | BRD2  | rs77845645  | S21 | NA          | 2.95E-17 | 1.20E-09    | 1.69E-13   | 9.77E-06 | 1.00E+00 | 8.01E-03 |
| phe.Fasting_rs116011837S9  | BRD2  | rs78353402  | S8  | AP3M2       | 5.95E-16 | 2.43E-08    | 1.84E-12   | 7.47E-14 | 3.04E-06 | 5.01E-10 |
| phe.Fasting_rs116011837S9  | BRD2  | rs78516788  | S8  | SLC38A1     | 2.24E-06 | 1.00E+00    | 1.24E-03   | 1.00E-12 | 4.08E-05 | 4.74E-09 |
| phe.Fasting_rs116011837S9  | BRD2  | rs78722272  | S5  | CNTLN       | 1.61E-13 | 6.59E-06    | 3.62E-10   | 5.19E-06 | 1.00E+00 | 4.72E-03 |
| phe.Fasting_rs116011837S9  | BRD2  | rs78736524  | S5  | KPNA3       | 6.47E-12 | 2.64E-04    | 1.13E-08   | 5.11E-15 | 2.08E-07 | 4.70E-11 |
| phe.Fasting_rs116011837S9  | BRD2  | rs79703349  | S24 | C17orf102   | 5.18E-14 | 2.12E-06    | 1.22E-10   | 5.11E-11 | 2.08E-03 | 1.65E-07 |
| phe.Fasting_rs116011837S9  | BRD2  | rs79781495  | S8  | KPNA3       | 6.47E-12 | 2.64E-04    | 1.13E-08   | 6.64E-15 | 2.70E-07 | 5.95E-11 |
| phe.Fasting_rs116011837S9  | BRD2  | rs79886603  | S15 | NA          | 2.25E-08 | 9.20E-01    | 1.97E-05   | 5.60E-14 | 2.28E-06 | 3.85E-10 |
| phe.Fasting_rs116011837S9  | BRD2  | rs80200953  | S8  | PPP2R5D     | 1.34E-06 | 1.00E+00    | 7.87E-04   | 3.69E-10 | 1.50E-02 | 9.76E-07 |
| phe.Fasting_rs116011837S9  | BRD2  | rs80332465  | S5  | KPNA3       | 6.98E-12 | 2.85E-04    | 1.20E-08   | 8.15E-15 | 3.32E-07 | 7.19E-11 |
| phe.Fasting_rs116011837S9  | BRD2  | rs80334773  | S5  | KPNA3       | 6.98E-12 | 2.85E-04    | 1.20E-08   | 8.15E-15 | 3.32E-07 | 7.19E-11 |
| phe.Fasting_rs116079984S8  | KPNA3 | rs140524622 | S7  | MRPL10      | 3.78E-08 | 1.00E+00    | 3.18E-05   | 1.95E-16 | 7.95E-09 | 7.69E-12 |
| phe.Fasting_rs116079984S8  | KPNA3 | rs57503635  | S3  | NA          | 1.29E-15 | 5.25E-08    | 3.74E-12   | 5.16E-15 | 2.10E-07 | 4.74E-11 |
| phe.Fasting_rs116079984S8  | KPNA3 | rs7256517   | S7  | CYTH2       | 1.78E-05 | 1.00E+00    | 7.54E-03   | 1.65E-06 | 1.00E+00 | 1.74E-03 |
| phe.Fasting_rs116079984S8  | KPNA3 | rs75506779  | S5  | TMCO3       | 2.52E-06 | 1.00E+00    | 1.37E-03   | 4.53E-15 | 1.85E-07 | 4.21E-11 |
| phe.Fasting_rs116080931S23 | HLA-G | rs114764631 | S23 | NA          | 2.82E-07 | 1.00E+00    | 1.96E-04   | 4.13E-09 | 1.68E-01 | 8.45E-06 |
| phe.Fasting_rs116080931S23 | HLA-G | rs139070959 | S8  | RPN2        | 1.85E-09 | 7.55E-02    | 1.94E-06   | 2.41E-06 | 1.00E+00 | 2.43E-03 |
| phe.Fasting_rs116080931S23 | HLA-G | rs145412529 | S8  | "RBL1,RPS3A | 1.03E-09 | 4.21E-02    | 1.13E-06   | 2.51E-06 | 1.00E+00 | 2.51E-03 |
| phe.Fasting_rs116120727S9  | BRD2  | rs112089881 | S8  | ZFAND4      | 2.75E-18 | 1.12E-10    | 4.87E-14   | 2.89E-17 | 1.18E-09 | 2.81E-12 |
| phe.Fasting_rs116120727S9  | BRD2  | rs112348319 | S8  | SPTLC1      | 9.09E-14 | 3.71E-06    | 2.08E-10   | 4.63E-11 | 1.89E-03 | 1.51E-07 |

|                            |      |                 |           |          |          |          |          |          |          |
|----------------------------|------|-----------------|-----------|----------|----------|----------|----------|----------|----------|
| phe.Fasting_rs116120727 S9 | BRD2 | rs112608164 S8  | SPTLC1    | 9.09E-14 | 3.71E-06 | 2.08E-10 | 4.63E-11 | 1.89E-03 | 1.51E-07 |
| phe.Fasting_rs116120727 S9 | BRD2 | rs113568654 S12 | SPTLC1    | 7.73E-14 | 3.16E-06 | 1.78E-10 | 2.81E-10 | 1.14E-02 | 7.68E-07 |
| phe.Fasting_rs116120727 S9 | BRD2 | rs114334325 S7  | AP3M2     | 5.95E-16 | 2.43E-08 | 1.84E-12 | 7.47E-14 | 3.04E-06 | 5.01E-10 |
| phe.Fasting_rs116120727 S9 | BRD2 | rs114394395 S7  | AP3M2     | 6.40E-16 | 2.61E-08 | 1.97E-12 | 7.47E-14 | 3.04E-06 | 5.01E-10 |
| phe.Fasting_rs116120727 S9 | BRD2 | rs114565620 S8  | RCL1      | 1.29E-17 | 5.27E-10 | 1.08E-13 | 2.80E-12 | 1.14E-04 | 1.19E-08 |
| phe.Fasting_rs116120727 S9 | BRD2 | rs115083290 S19 | NA        | 7.17E-17 | 2.93E-09 | 3.22E-13 | 1.49E-08 | 6.07E-01 | 2.65E-05 |
| phe.Fasting_rs116120727 S9 | BRD2 | rs115305957 S23 | NA        | 6.33E-14 | 2.59E-06 | 1.47E-10 | 5.30E-07 | 1.00E+00 | 6.31E-04 |
| phe.Fasting_rs116120727 S9 | BRD2 | rs115752779 S19 | NA        | 7.17E-17 | 2.93E-09 | 3.22E-13 | 1.49E-08 | 6.07E-01 | 2.65E-05 |
| phe.Fasting_rs116120727 S9 | BRD2 | rs115787552 S5  | KPNA3     | 6.47E-12 | 2.64E-04 | 1.13E-08 | 5.11E-15 | 2.08E-07 | 4.70E-11 |
| phe.Fasting_rs116120727 S9 | BRD2 | rs115888477 S8  | NA        | 2.63E-11 | 1.07E-03 | 3.78E-08 | 1.14E-15 | 4.64E-08 | 1.31E-11 |
| phe.Fasting_rs116120727 S9 | BRD2 | rs116079984 S8  | KPNA3     | 6.47E-12 | 2.64E-04 | 1.13E-08 | 8.10E-15 | 3.30E-07 | 7.15E-11 |
| phe.Fasting_rs116120727 S9 | BRD2 | rs11612419 S8   | NRIP2     | 3.68E-06 | 1.00E+00 | 1.90E-03 | 8.64E-06 | 1.00E+00 | 7.24E-03 |
| phe.Fasting_rs116120727 S9 | BRD2 | rs116406581 S2  | NA        | 2.60E-15 | 1.06E-07 | 7.29E-12 | 4.98E-14 | 2.03E-06 | 3.45E-10 |
| phe.Fasting_rs116120727 S9 | BRD2 | rs116548615 S8  | TMEM45B   | 2.55E-17 | 1.04E-09 | 1.58E-13 | 2.14E-12 | 8.73E-05 | 9.31E-09 |
| phe.Fasting_rs116120727 S9 | BRD2 | rs116696844 S3  | AP3M2     | 9.71E-16 | 3.96E-08 | 2.89E-12 | 7.47E-14 | 3.04E-06 | 5.01E-10 |
| phe.Fasting_rs116120727 S9 | BRD2 | rs140524622 S7  | MRPL10    | 1.84E-06 | 1.00E+00 | 1.04E-03 | 1.09E-10 | 4.44E-03 | 3.32E-07 |
| phe.Fasting_rs116120727 S9 | BRD2 | rs141926074 S8  | ATE1      | 4.36E-18 | 1.78E-10 | 6.36E-14 | 8.52E-14 | 3.47E-06 | 5.69E-10 |
| phe.Fasting_rs116120727 S9 | BRD2 | rs146815317 S5  | KPNA3     | 6.47E-12 | 2.64E-04 | 1.13E-08 | 5.11E-15 | 2.08E-07 | 4.70E-11 |
| phe.Fasting_rs116120727 S9 | BRD2 | rs150117838 S8  | KPNA3     | 6.47E-12 | 2.64E-04 | 1.13E-08 | 6.64E-15 | 2.70E-07 | 5.95E-11 |
| phe.Fasting_rs116120727 S9 | BRD2 | rs16908547 S8   | PAG1      | 1.95E-10 | 7.98E-03 | 2.41E-07 | 4.34E-10 | 1.77E-02 | 1.14E-06 |
| phe.Fasting_rs116120727 S9 | BRD2 | rs16929995 S8   | NRIP2     | 3.26E-06 | 1.00E+00 | 1.70E-03 | 8.67E-06 | 1.00E+00 | 7.26E-03 |
| phe.Fasting_rs116120727 S9 | BRD2 | rs366767 S5     | ZC3H3     | 1.08E-13 | 4.41E-06 | 2.45E-10 | 9.53E-13 | 3.88E-05 | 4.53E-09 |
| phe.Fasting_rs116120727 S9 | BRD2 | rs57503635 S3   | NA        | 1.10E-16 | 4.48E-09 | 4.61E-13 | 3.70E-08 | 1.00E+00 | 5.84E-05 |
| phe.Fasting_rs116120727 S9 | BRD2 | rs60011869 S16  | NA        | 8.30E-12 | 3.39E-04 | 1.38E-08 | 4.47E-10 | 1.82E-02 | 1.17E-06 |
| phe.Fasting_rs116120727 S9 | BRD2 | rs7004597 S8    | NA        | 5.95E-16 | 2.43E-08 | 1.84E-12 | 4.49E-14 | 1.83E-06 | 3.12E-10 |
| phe.Fasting_rs116120727 S9 | BRD2 | rs7256517 S7    | CYTH2     | 2.03E-16 | 8.29E-09 | 7.05E-13 | 1.06E-09 | 4.30E-02 | 2.50E-06 |
| phe.Fasting_rs116120727 S9 | BRD2 | rs7307516 S8    | NRIP2     | 3.50E-06 | 1.00E+00 | 1.81E-03 | 8.55E-06 | 1.00E+00 | 7.17E-03 |
| phe.Fasting_rs116120727 S9 | BRD2 | rs73619637 S8   | NA        | 5.81E-06 | 1.00E+00 | 2.85E-03 | 1.82E-12 | 7.40E-05 | 7.96E-09 |
| phe.Fasting_rs116120727 S9 | BRD2 | rs74701059 S24  | C17orf102 | 5.18E-14 | 2.12E-06 | 1.22E-10 | 2.10E-08 | 8.56E-01 | 3.59E-05 |
| phe.Fasting_rs116120727 S9 | BRD2 | rs74914207 S24  | NA        | 8.13E-10 | 3.32E-02 | 9.00E-07 | 3.61E-08 | 1.00E+00 | 5.73E-05 |
| phe.Fasting_rs116120727 S9 | BRD2 | rs75350765 S5   | RCL1      | 1.29E-17 | 5.27E-10 | 1.08E-13 | 2.80E-12 | 1.14E-04 | 1.19E-08 |
| phe.Fasting_rs116120727 S9 | BRD2 | rs75374128 S5   | CNTLN     | 1.61E-13 | 6.59E-06 | 3.62E-10 | 5.08E-06 | 1.00E+00 | 4.63E-03 |
| phe.Fasting_rs116120727 S9 | BRD2 | rs75506779 S5   | TMCO3     | 3.56E-12 | 1.45E-04 | 6.43E-09 | 2.91E-08 | 1.00E+00 | 4.74E-05 |
| phe.Fasting_rs116120727 S9 | BRD2 | rs75758702 S24  | NA        | 1.02E-17 | 4.19E-10 | 9.80E-14 | 4.31E-10 | 1.75E-02 | 1.13E-06 |
| phe.Fasting_rs116120727 S9 | BRD2 | rs75864203 S8   | CNTLN     | 1.61E-13 | 6.59E-06 | 3.62E-10 | 5.08E-06 | 1.00E+00 | 4.63E-03 |
| phe.Fasting_rs116120727 S9 | BRD2 | rs76542405 S5   | SPTLC1    | 9.09E-14 | 3.71E-06 | 2.08E-10 | 4.63E-11 | 1.89E-03 | 1.51E-07 |
| phe.Fasting_rs116120727 S9 | BRD2 | rs76844308 S8   | CNTLN     | 6.35E-14 | 2.59E-06 | 1.48E-10 | 5.33E-06 | 1.00E+00 | 4.84E-03 |
| phe.Fasting_rs116120727 S9 | BRD2 | rs77523818 S7   | SPTLC1    | 9.09E-14 | 3.71E-06 | 2.08E-10 | 4.63E-11 | 1.89E-03 | 1.51E-07 |
| phe.Fasting_rs116120727 S9 | BRD2 | rs77798597 S7   | KPNA3     | 6.47E-12 | 2.64E-04 | 1.13E-08 | 6.64E-15 | 2.70E-07 | 5.95E-11 |
| phe.Fasting_rs116120727 S9 | BRD2 | rs77845645 S21  | NA        | 2.95E-17 | 1.20E-09 | 1.69E-13 | 9.77E-06 | 1.00E+00 | 8.01E-03 |

|              |             |     |           |              |     |           |          |            |           |          |          |          |
|--------------|-------------|-----|-----------|--------------|-----|-----------|----------|------------|-----------|----------|----------|----------|
| phe.Fasting_ | rs116120727 | S9  | BRD2      | rs78353402   | S8  | AP3M2     | 5.95E-16 | 2.43E-08   | 1.84E-12  | 7.47E-14 | 3.04E-06 | 5.01E-10 |
| phe.Fasting_ | rs116120727 | S9  | BRD2      | rs78516788   | S8  | SLC38A1   | 2.24E-06 | 1.00E+00   | 1.24E-03  | 1.00E-12 | 4.08E-05 | 4.74E-09 |
| phe.Fasting_ | rs116120727 | S9  | BRD2      | rs78722272   | S5  | CNTLN     | 1.61E-13 | 6.59E-06   | 3.62E-10  | 5.19E-06 | 1.00E+00 | 4.72E-03 |
| phe.Fasting_ | rs116120727 | S9  | BRD2      | rs78736524   | S5  | KPNA3     | 6.47E-12 | 2.64E-04   | 1.13E-08  | 5.11E-15 | 2.08E-07 | 4.70E-11 |
| phe.Fasting_ | rs116120727 | S9  | BRD2      | rs79703349   | S24 | C17orf102 | 5.18E-14 | 2.12E-06   | 1.22E-10  | 5.11E-11 | 2.08E-03 | 1.65E-07 |
| phe.Fasting_ | rs116120727 | S9  | BRD2      | rs79781495   | S8  | KPNA3     | 6.47E-12 | 2.64E-04   | 1.13E-08  | 6.64E-15 | 2.70E-07 | 5.95E-11 |
| phe.Fasting_ | rs116120727 | S9  | BRD2      | rs79886603   | S15 | NA        | 2.25E-08 | 9.20E-01   | 1.97E-05  | 5.60E-14 | 2.28E-06 | 3.85E-10 |
| phe.Fasting_ | rs116120727 | S9  | BRD2      | rs80200953   | S8  | PPP2R5D   | 1.34E-06 | 1.00E+00   | 7.87E-04  | 3.69E-10 | 1.50E-02 | 9.76E-07 |
| phe.Fasting_ | rs116120727 | S9  | BRD2      | rs80332465   | S5  | KPNA3     | 6.98E-12 | 2.85E-04   | 1.20E-08  | 8.15E-15 | 3.32E-07 | 7.19E-11 |
| phe.Fasting_ | rs116120727 | S9  | BRD2      | rs80334773   | S5  | KPNA3     | 6.98E-12 | 2.85E-04   | 1.20E-08  | 8.15E-15 | 3.32E-07 | 7.19E-11 |
| phe.Fasting_ | rs116129306 | S3  | MICA      | rs114565620  | S8  | RCL1      | 2.27E-05 | 1.00E+00   | 9.31E-03  | 1.11E-06 | 1.00E+00 | 1.24E-03 |
| phe.Fasting_ | rs116129306 | S3  | MICA      | rs12581352   | S2  | NA        | 5.03E-07 | 1.00E+00   | 3.30E-04  | 2.80E-08 | 1.00E+00 | 4.57E-05 |
| phe.Fasting_ | rs116129306 | S3  | MICA      | rs139070959  | S8  | RPN2      | 1.60E-07 | 1.00E+00   | 1.16E-04  | 6.64E-06 | 1.00E+00 | 5.80E-03 |
| phe.Fasting_ | rs116129306 | S3  | MICA      | rs75350765   | S5  | RCL1      | 2.27E-05 | 1.00E+00   | 9.31E-03  | 1.11E-06 | 1.00E+00 | 1.24E-03 |
| phe.Fasting_ | rs116279995 | S20 | "PCDHGA4, | Prs112089881 | S8  | ZFAND4    | 1.96E-18 | 7.99E-11   | 4.03E-14  | 3.02E-10 | 1.23E-02 | 8.15E-07 |
| phe.Fasting_ | rs116279995 | S20 | "PCDHGA4, | Prs112091318 | S5  | TMEM64    | 1.52E-05 | 1.00E+00   | 6.58E-03  | 2.56E-07 | 1.00E+00 | 3.30E-04 |
| phe.Fasting_ | rs116279995 | S20 | "PCDHGA4, | Prs114334325 | S7  | AP3M2     | 8.70E-16 | 3.55E-08   | 2.60E-12  | 5.52E-06 | 1.00E+00 | 4.97E-03 |
| phe.Fasting_ | rs116279995 | S20 | "PCDHGA4, | Prs114394395 | S7  | AP3M2     | 9.30E-16 | 3.80E-08   | 2.77E-12  | 5.52E-06 | 1.00E+00 | 4.97E-03 |
| phe.Fasting_ | rs116279995 | S20 | "PCDHGA4, | Prs114565620 | S8  | RCL1      | 1.29E-17 | 5.26E-10   | 1.08E-13  | 1.39E-08 | 5.66E-01 | 2.49E-05 |
| phe.Fasting_ | rs116279995 | S20 | "PCDHGA4, | Prs115305957 | S23 | NA        | 1.81E-05 | 1.00E+00   | 7.66E-03  | 1.43E-12 | 5.82E-05 | 6.44E-09 |
| phe.Fasting_ | rs116279995 | S20 | "PCDHGA4, | Prs115787552 | S5  | KPNA3     | 3.78E-16 | 1.54E-08   | 1.23E-12  | 4.20E-14 | 1.71E-06 | 2.93E-10 |
| phe.Fasting_ | rs116279995 | S20 | "PCDHGA4, | Prs115888477 | S8  | NA        | 2.72E-15 | 1.11E-07   | 7.62E-12  | 7.36E-15 | 3.00E-07 | 6.53E-11 |
| phe.Fasting_ | rs116279995 | S20 | "PCDHGA4, | Prs116011837 | S9  | BRD2      | 1.05E-06 | 1.00E+00   | 6.32E-04  | 6.95E-14 | 2.83E-06 | 4.69E-10 |
| phe.Fasting_ | rs116279995 | S20 | "PCDHGA4, | Prs116079984 | S8  | KPNA3     | 3.78E-16 | 1.54E-08   | 1.23E-12  | 4.48E-14 | 1.82E-06 | 3.11E-10 |
| phe.Fasting_ | rs116279995 | S20 | "PCDHGA4, | Prs116120727 | S9  | BRD2      | 1.05E-06 | 1.00E+00   | 6.32E-04  | 6.95E-14 | 2.83E-06 | 4.69E-10 |
| phe.Fasting_ | rs116279995 | S20 | "PCDHGA4, | Prs116406581 | S2  | NA        | 3.68E-15 | 1.50E-07   | 9.90E-12  | 3.30E-06 | 1.00E+00 | 3.18E-03 |
| phe.Fasting_ | rs116279995 | S20 | "PCDHGA4, | Prs116548615 | S8  | TMEM45B   | 2.04E-17 | 8.34E-10   | 1.43E-13  | 7.86E-12 | 3.20E-04 | 2.98E-08 |
| phe.Fasting_ | rs116279995 | S20 | "PCDHGA4, | Prs116696844 | S3  | AP3M2     | 1.40E-15 | 5.70E-08   | 4.02E-12  | 5.52E-06 | 1.00E+00 | 4.97E-03 |
| phe.Fasting_ | rs116279995 | S20 | "PCDHGA4, | Prs146815317 | S5  | KPNA3     | 3.78E-16 | 1.54E-08   | 1.23E-12  | 4.20E-14 | 1.71E-06 | 2.93E-10 |
| phe.Fasting_ | rs116279995 | S20 | "PCDHGA4, | Prs150117838 | S8  | KPNA3     | 3.78E-16 | 1.54E-08   | 1.23E-12  | 3.89E-14 | 1.58E-06 | 2.77E-10 |
| phe.Fasting_ | rs116279995 | S20 | "PCDHGA4, | Prs16894241  | S4  | HIST1H2BK | 1.90E-07 | 1.00E+00   | 1.36E-04  | 1.18E-14 | 4.80E-07 | 1.01E-10 |
| phe.Fasting_ | rs116279995 | S20 | "PCDHGA4, | Prs2153597   | S8  | ZNF438    | 5.42E-12 | 2.22E-04   | 9.59E-09  | 5.42E-06 | 1.00E+00 | 4.90E-03 |
| phe.Fasting_ | rs116279995 | S20 | "PCDHGA4, | Prs352346    | S3  | GRPEL2    | 2.27E-07 | 1.00E+00   | 1.60E-04  | 1.07E-05 | 1.00E+00 | 8.65E-03 |
| phe.Fasting_ | rs116279995 | S20 | "PCDHGA4, | Prs57503635  | S3  | NA        | 7.95E-08 | 1.00E+00   | 6.20E-05  | 1.16E-14 | 4.73E-07 | 1.00E-10 |
| phe.Fasting_ | rs116279995 | S20 | "PCDHGA4, | Prs60011869  | S16 | NA        | 1.45E-06 | 1.00E+00   | 8.45E-04  | 3.19E-10 | 1.30E-02 | 8.56E-07 |
| phe.Fasting_ | rs116279995 | S20 | "PCDHGA4, | Prs7004597   | S8  | NA        | 8.70E-16 | 3.55E-08   | 2.60E-12  | 3.26E-06 | 1.00E+00 | 3.15E-03 |
| phe.Fasting_ | rs116279995 | S20 | "PCDHGA4, | Prs7256517   | S7  | CYTH2     | 1.38E-16 | 5.63E-09   | 5.47E-13  | 2.91E-10 | 1.18E-02 | 7.91E-07 |
| phe.Fasting_ | rs116279995 | S20 | "PCDHGA4, | Prs73392640  | S8  | POLR3B    | 3.00E-11 | 0.00122354 | 4.24E-08  | 4.09E-10 | 1.66E-02 | 1.07E-06 |
| phe.Fasting_ | rs116279995 | S20 | "PCDHGA4, | Prs74627895  | S8  | TMEM64    | 1.52E-05 | 1          | 0.0065785 | 1.28E-07 | 1.00E+00 | 1.77E-04 |
| phe.Fasting_ | rs116279995 | S20 | "PCDHGA4, | Prs74701059  | S24 | C17orf102 | 1.84E-05 | 1.00E+00   | 7.76E-03  | 2.11E-12 | 8.58E-05 | 9.15E-09 |

|                             |                          |             |          |           |          |          |          |          |
|-----------------------------|--------------------------|-------------|----------|-----------|----------|----------|----------|----------|
| phe.Fasting_rs116279995 S20 | "PCDHGA4,Prs74914207 S24 | NA          | 1.23E-11 | 5.03E-04  | 1.92E-08 | 1.49E-07 | 1.00E+00 | 2.03E-04 |
| phe.Fasting_rs116279995 S20 | "PCDHGA4,Prs75350765 S5  | RCL1        | 1.29E-17 | 5.26E-10  | 1.08E-13 | 1.39E-08 | 5.66E-01 | 2.49E-05 |
| phe.Fasting_rs116279995 S20 | "PCDHGA4,Prs75374128 S5  | CNTLN       | 1.32E-17 | 5.41E-10  | 1.09E-13 | 2.01E-06 | 1.00E+00 | 2.08E-03 |
| phe.Fasting_rs116279995 S20 | "PCDHGA4,Prs75758702 S24 | NA          | 7.70E-18 | 3.14E-10  | 8.50E-14 | 6.42E-10 | 2.61E-02 | 1.61E-06 |
| phe.Fasting_rs116279995 S20 | "PCDHGA4,Prs75864203 S8  | CNTLN       | 1.32E-17 | 5.41E-10  | 1.09E-13 | 2.01E-06 | 1.00E+00 | 2.08E-03 |
| phe.Fasting_rs116279995 S20 | "PCDHGA4,Prs76844308 S8  | CNTLN       | 7.07E-18 | 2.89E-10  | 8.18E-14 | 1.78E-06 | 1.00E+00 | 1.87E-03 |
| phe.Fasting_rs116279995 S20 | "PCDHGA4,Prs7763107 S8   | FARS2       | 2.63E-08 | 1.00E+00  | 2.28E-05 | 3.07E-10 | 1.25E-02 | 8.27E-07 |
| phe.Fasting_rs116279995 S20 | "PCDHGA4,Prs77798597 S7  | KPNA3       | 3.78E-16 | 1.54E-08  | 1.23E-12 | 3.89E-14 | 1.58E-06 | 2.77E-10 |
| phe.Fasting_rs116279995 S20 | "PCDHGA4,Prs77845645 S21 | NA          | 2.15E-07 | 1.00E+00  | 1.52E-04 | 2.70E-11 | 1.10E-03 | 9.29E-08 |
| phe.Fasting_rs116279995 S20 | "PCDHGA4,Prs78353402 S8  | AP3M2       | 8.70E-16 | 3.55E-08  | 2.60E-12 | 5.52E-06 | 1.00E+00 | 4.97E-03 |
| phe.Fasting_rs116279995 S20 | "PCDHGA4,Prs78516788 S8  | SLC38A1     | 3.43E-12 | 1.40E-04  | 6.23E-09 | 7.67E-09 | 3.12E-01 | 1.47E-05 |
| phe.Fasting_rs116279995 S20 | "PCDHGA4,Prs78697063 S5  | MSI2        | 4.23E-20 | 1.73E-12  | 2.23E-14 | 2.49E-10 | 1.01E-02 | 6.85E-07 |
| phe.Fasting_rs116279995 S20 | "PCDHGA4,Prs78722272 S5  | CNTLN       | 1.32E-17 | 5.41E-10  | 1.09E-13 | 2.07E-06 | 1.00E+00 | 2.14E-03 |
| phe.Fasting_rs116279995 S20 | "PCDHGA4,Prs78736524 S5  | KPNA3       | 3.78E-16 | 1.54E-08  | 1.23E-12 | 4.20E-14 | 1.71E-06 | 2.93E-10 |
| phe.Fasting_rs116279995 S20 | "PCDHGA4,Prs79703349 S24 | C17orf102   | 1.84E-05 | 1.00E+00  | 7.76E-03 | 2.63E-12 | 1.07E-04 | 1.13E-08 |
| phe.Fasting_rs116279995 S20 | "PCDHGA4,Prs79781495 S8  | KPNA3       | 3.78E-16 | 1.54E-08  | 1.23E-12 | 3.89E-14 | 1.58E-06 | 2.77E-10 |
| phe.Fasting_rs116279995 S20 | "PCDHGA4,Prs79886603 S15 | NA          | 1.10E-08 | 4.48E-01  | 1.01E-05 | 9.00E-06 | 1.00E+00 | 7.49E-03 |
| phe.Fasting_rs116279995 S20 | "PCDHGA4,Prs80200953 S8  | PPP2R5D     | 1.32E-08 | 5.39E-01  | 1.20E-05 | 3.10E-06 | 1.00E+00 | 3.01E-03 |
| phe.Fasting_rs116279995 S20 | "PCDHGA4,Prs80332465 S5  | KPNA3       | 4.04E-16 | 1.65E-08  | 1.31E-12 | 4.20E-14 | 1.71E-06 | 2.93E-10 |
| phe.Fasting_rs116279995 S20 | "PCDHGA4,Prs80334773 S5  | KPNA3       | 4.04E-16 | 1.65E-08  | 1.31E-12 | 4.20E-14 | 1.71E-06 | 2.93E-10 |
| phe.Fasting_rs116354769 S23 | HLA-G rs114764631 S23    | NA          | 2.82E-07 | 1.00E+00  | 1.96E-04 | 4.13E-09 | 1.68E-01 | 8.45E-06 |
| phe.Fasting_rs116354769 S23 | HLA-G rs139070959 S8     | RPN2        | 1.85E-09 | 0.0755239 | 1.94E-06 | 2.41E-06 | 1.00E+00 | 2.43E-03 |
| phe.Fasting_rs116354769 S23 | HLA-G rs145412529 S8     | "RBL1,RPS3A | 1.03E-09 | 0.0420988 | 1.13E-06 | 2.51E-06 | 1.00E+00 | 2.51E-03 |
| phe.Fasting_rs116406581 S2  | NA rs111576333 S5        | TMEM64      | 5.02E-15 | 2.05E-07  | 1.31E-11 | 4.12E-08 | 1.00E+00 | 6.44E-05 |
| phe.Fasting_rs116406581 S2  | NA rs112089881 S8        | ZFAND4      | 9.39E-09 | 3.84E-01  | 8.82E-06 | 1.95E-06 | 1.00E+00 | 2.03E-03 |
| phe.Fasting_rs116406581 S2  | NA rs112091318 S5        | TMEM64      | 1.37E-15 | 5.60E-08  | 3.96E-12 | 1.54E-08 | 6.27E-01 | 2.73E-05 |
| phe.Fasting_rs116406581 S2  | NA rs11989304 S4         | TMEM64      | 5.02E-15 | 2.05E-07  | 1.31E-11 | 8.19E-07 | 1.00E+00 | 9.41E-04 |
| phe.Fasting_rs116406581 S2  | NA rs141926074 S8        | ATE1        | 2.29E-16 | 9.33E-09  | 7.77E-13 | 2.01E-08 | 8.17E-01 | 3.45E-05 |
| phe.Fasting_rs116406581 S2  | NA rs1470889 S5          | ZC3H3       | 1.86E-08 | 7.60E-01  | 1.65E-05 | 5.11E-09 | 2.08E-01 | 1.01E-05 |
| phe.Fasting_rs116406581 S2  | NA rs1470890 S5          | ZC3H3       | 1.86E-08 | 7.60E-01  | 1.65E-05 | 5.11E-09 | 2.08E-01 | 1.01E-05 |
| phe.Fasting_rs116406581 S2  | NA rs2924507 S5          | ZC3H3       | 1.86E-08 | 7.60E-01  | 1.65E-05 | 5.11E-09 | 2.08E-01 | 1.01E-05 |
| phe.Fasting_rs116406581 S2  | NA rs2924508 S8          | ZC3H3       | 1.86E-08 | 7.60E-01  | 1.65E-05 | 6.37E-09 | 2.59E-01 | 1.24E-05 |
| phe.Fasting_rs116406581 S2  | NA rs2924511 S7          | ZC3H3       | 1.86E-08 | 7.60E-01  | 1.65E-05 | 4.40E-09 | 1.79E-01 | 8.96E-06 |
| phe.Fasting_rs116406581 S2  | NA rs2924512 S7          | ZC3H3       | 2.04E-08 | 8.33E-01  | 1.80E-05 | 5.75E-09 | 2.34E-01 | 1.13E-05 |
| phe.Fasting_rs116406581 S2  | NA rs2956376 S8          | ZC3H3       | 1.86E-08 | 7.60E-01  | 1.65E-05 | 2.82E-09 | 1.15E-01 | 6.01E-06 |
| phe.Fasting_rs116406581 S2  | NA rs2980270 S7          | ZC3H3       | 1.86E-08 | 7.60E-01  | 1.65E-05 | 2.82E-09 | 1.15E-01 | 6.01E-06 |
| phe.Fasting_rs116406581 S2  | NA rs2980272 S7          | ZC3H3       | 2.04E-08 | 8.33E-01  | 1.80E-05 | 6.20E-09 | 2.52E-01 | 1.20E-05 |
| phe.Fasting_rs116406581 S2  | NA rs2980275 S5          | ZC3H3       | 1.86E-08 | 7.60E-01  | 1.65E-05 | 5.11E-09 | 2.08E-01 | 1.01E-05 |
| phe.Fasting_rs116406581 S2  | NA rs366767 S5           | ZC3H3       | 3.62E-08 | 1.00E+00  | 3.05E-05 | 3.23E-09 | 1.32E-01 | 6.80E-06 |
| phe.Fasting_rs116406581 S2  | NA rs73283603 S7         | ZWINT       | 4.09E-12 | 1.67E-04  | 7.36E-09 | 1.40E-06 | 1.00E+00 | 1.53E-03 |

|              |             |     |           |             |     |             |          |          |          |          |          |          |
|--------------|-------------|-----|-----------|-------------|-----|-------------|----------|----------|----------|----------|----------|----------|
| phe.Fasting_ | rs116406581 | S2  | NA        | rs73392640  | S8  | POLR3B      | 3.88E-14 | 1.58E-06 | 9.32E-11 | 2.42E-08 | 9.84E-01 | 4.00E-05 |
| phe.Fasting_ | rs116406581 | S2  | NA        | rs73619637  | S8  | NA          | 1.39E-13 | 5.67E-06 | 3.13E-10 | 4.17E-11 | 1.70E-03 | 1.37E-07 |
| phe.Fasting_ | rs116406581 | S2  | NA        | rs74627895  | S8  | TMEM64      | 1.37E-15 | 5.60E-08 | 3.96E-12 | 1.34E-07 | 1.00E+00 | 1.85E-04 |
| phe.Fasting_ | rs116406581 | S2  | NA        | rs75949566  | S5  | TMEM64      | 6.15E-15 | 2.51E-07 | 1.59E-11 | 1.02E-06 | 1.00E+00 | 1.15E-03 |
| phe.Fasting_ | rs116406581 | S2  | NA        | rs78990344  | S2  | LOC1005063! | 5.02E-15 | 2.05E-07 | 1.31E-11 | 8.19E-07 | 1.00E+00 | 9.41E-04 |
| phe.Fasting_ | rs116406581 | S2  | NA        | rs8075478   | S8  | MYH10       | 8.91E-10 | 3.64E-02 | 9.82E-07 | 7.16E-07 | 1.00E+00 | 8.33E-04 |
| phe.Fasting_ | rs116510017 | S23 | LOC554223 | rs114764631 | S23 | NA          | 1.40E-11 | 5.71E-04 | 2.16E-08 | 6.53E-09 | 2.66E-01 | 1.26E-05 |
| phe.Fasting_ | rs116510017 | S23 | LOC554223 | rs139070959 | S8  | RPN2        | 2.83E-09 | 1.16E-01 | 2.90E-06 | 3.42E-06 | 1.00E+00 | 3.29E-03 |
| phe.Fasting_ | rs116510017 | S23 | LOC554223 | rs145412529 | S8  | "RBL1,RPS3A | 1.60E-09 | 6.55E-02 | 1.70E-06 | 3.58E-06 | 1.00E+00 | 3.41E-03 |
| phe.Fasting_ | rs116548615 | S8  | TMEM45B   | rs57503635  | S3  | NA          | 8.28E-17 | 3.38E-09 | 3.63E-13 | 6.87E-07 | 1.00E+00 | 8.01E-04 |
| phe.Fasting_ | rs116548615 | S8  | TMEM45B   | rs73619637  | S8  | NA          | 1.70E-16 | 6.94E-09 | 6.08E-13 | 2.12E-17 | 8.64E-10 | 2.33E-12 |
| phe.Fasting_ | rs116548615 | S8  | TMEM45B   | rs8075478   | S8  | MYH10       | 1.72E-17 | 7.02E-10 | 1.28E-13 | 6.34E-08 | 1.00E+00 | 9.52E-05 |
| phe.Fasting_ | rs116630630 | S23 | HLA-G     | rs114764631 | S23 | NA          | 2.82E-07 | 1.00E+00 | 1.96E-04 | 4.13E-09 | 1.68E-01 | 8.45E-06 |
| phe.Fasting_ | rs116630630 | S23 | HLA-G     | rs139070959 | S8  | RPN2        | 1.85E-09 | 7.55E-02 | 1.94E-06 | 2.41E-06 | 1.00E+00 | 2.43E-03 |
| phe.Fasting_ | rs116630630 | S23 | HLA-G     | rs145412529 | S8  | "RBL1,RPS3A | 1.03E-09 | 4.21E-02 | 1.13E-06 | 2.51E-06 | 1.00E+00 | 2.51E-03 |
| phe.Fasting_ | rs116696844 | S3  | AP3M2     | rs111576333 | S5  | TMEM64      | 2.15E-15 | 8.80E-08 | 6.10E-12 | 6.72E-08 | 1.00E+00 | 1.00E-04 |
| phe.Fasting_ | rs116696844 | S3  | AP3M2     | rs112091318 | S5  | TMEM64      | 5.98E-16 | 2.44E-08 | 1.85E-12 | 3.09E-08 | 1.00E+00 | 4.98E-05 |
| phe.Fasting_ | rs116696844 | S3  | AP3M2     | rs11989304  | S4  | TMEM64      | 2.15E-15 | 8.80E-08 | 6.10E-12 | 1.33E-06 | 1.00E+00 | 1.46E-03 |
| phe.Fasting_ | rs116696844 | S3  | AP3M2     | rs141926074 | S8  | ATE1        | 8.14E-17 | 3.32E-09 | 3.58E-13 | 3.83E-08 | 1.00E+00 | 6.03E-05 |
| phe.Fasting_ | rs116696844 | S3  | AP3M2     | rs1470889   | S5  | ZC3H3       | 5.38E-09 | 2.20E-01 | 5.24E-06 | 4.45E-07 | 1.00E+00 | 5.38E-04 |
| phe.Fasting_ | rs116696844 | S3  | AP3M2     | rs1470890   | S5  | ZC3H3       | 5.38E-09 | 2.20E-01 | 5.24E-06 | 4.45E-07 | 1.00E+00 | 5.38E-04 |
| phe.Fasting_ | rs116696844 | S3  | AP3M2     | rs2924507   | S5  | ZC3H3       | 5.38E-09 | 2.20E-01 | 5.24E-06 | 4.45E-07 | 1.00E+00 | 5.38E-04 |
| phe.Fasting_ | rs116696844 | S3  | AP3M2     | rs2924508   | S8  | ZC3H3       | 5.38E-09 | 2.20E-01 | 5.24E-06 | 1.22E-08 | 4.96E-01 | 2.22E-05 |
| phe.Fasting_ | rs116696844 | S3  | AP3M2     | rs2924511   | S7  | ZC3H3       | 5.38E-09 | 2.20E-01 | 5.24E-06 | 3.96E-07 | 1.00E+00 | 4.84E-04 |
| phe.Fasting_ | rs116696844 | S3  | AP3M2     | rs2924512   | S7  | ZC3H3       | 6.00E-09 | 2.45E-01 | 5.81E-06 | 5.18E-07 | 1.00E+00 | 6.17E-04 |
| phe.Fasting_ | rs116696844 | S3  | AP3M2     | rs2956376   | S8  | ZC3H3       | 5.38E-09 | 2.20E-01 | 5.24E-06 | 2.73E-07 | 1.00E+00 | 3.49E-04 |
| phe.Fasting_ | rs116696844 | S3  | AP3M2     | rs2980270   | S7  | ZC3H3       | 5.38E-09 | 2.20E-01 | 5.24E-06 | 2.73E-07 | 1.00E+00 | 3.49E-04 |
| phe.Fasting_ | rs116696844 | S3  | AP3M2     | rs2980272   | S7  | ZC3H3       | 6.00E-09 | 2.45E-01 | 5.81E-06 | 5.49E-07 | 1.00E+00 | 6.52E-04 |
| phe.Fasting_ | rs116696844 | S3  | AP3M2     | rs2980275   | S5  | ZC3H3       | 5.38E-09 | 2.20E-01 | 5.24E-06 | 4.45E-07 | 1.00E+00 | 5.38E-04 |
| phe.Fasting_ | rs116696844 | S3  | AP3M2     | rs366767    | S5  | ZC3H3       | 1.06E-08 | 4.32E-01 | 9.81E-06 | 3.06E-07 | 1.00E+00 | 3.86E-04 |
| phe.Fasting_ | rs116696844 | S3  | AP3M2     | rs73283603  | S7  | ZWINT       | 2.54E-12 | 1.04E-04 | 4.70E-09 | 2.55E-06 | 1.00E+00 | 2.54E-03 |
| phe.Fasting_ | rs116696844 | S3  | AP3M2     | rs73392640  | S8  | POLR3B      | 1.41E-14 | 5.75E-07 | 3.56E-11 | 5.32E-08 | 1.00E+00 | 8.11E-05 |
| phe.Fasting_ | rs116696844 | S3  | AP3M2     | rs73619637  | S8  | NA          | 4.88E-14 | 1.99E-06 | 1.15E-10 | 5.78E-11 | 2.35E-03 | 1.85E-07 |
| phe.Fasting_ | rs116696844 | S3  | AP3M2     | rs74627895  | S8  | TMEM64      | 5.98E-16 | 2.44E-08 | 1.85E-12 | 2.74E-07 | 1.00E+00 | 3.50E-04 |
| phe.Fasting_ | rs116696844 | S3  | AP3M2     | rs75949566  | S5  | TMEM64      | 2.66E-15 | 1.09E-07 | 7.46E-12 | 1.63E-06 | 1.00E+00 | 1.72E-03 |
| phe.Fasting_ | rs116696844 | S3  | AP3M2     | rs78990344  | S2  | LOC1005063! | 2.15E-15 | 8.80E-08 | 6.10E-12 | 1.33E-06 | 1.00E+00 | 1.46E-03 |
| phe.Fasting_ | rs116696844 | S3  | AP3M2     | rs8075478   | S8  | MYH10       | 4.16E-10 | 1.70E-02 | 4.82E-07 | 1.26E-06 | 1.00E+00 | 1.38E-03 |
| phe.Fasting_ | rs116708491 | S5  | MICA      | rs112009962 | S8  | NA          | 4.31E-07 | 1.00E+00 | 2.88E-04 | 7.41E-08 | 1.00E+00 | 1.08E-04 |
| phe.Fasting_ | rs116708491 | S5  | MICA      | rs112348319 | S8  | SPTLC1      | 1.03E-06 | 1.00E+00 | 6.25E-04 | 5.57E-07 | 1.00E+00 | 6.60E-04 |
| phe.Fasting_ | rs116708491 | S5  | MICA      | rs112608164 | S8  | SPTLC1      | 1.03E-06 | 1.00E+00 | 6.25E-04 | 5.57E-07 | 1.00E+00 | 6.60E-04 |



|                            |        |                 |             |          |          |             |          |          |          |
|----------------------------|--------|-----------------|-------------|----------|----------|-------------|----------|----------|----------|
| phe.Fasting_rs116708491 S5 | MICA   | rs113568654 S12 | SPTLC1      | 9.91E-07 | 1.00E+00 | 6.01E-04    | 2.61E-06 | 1.00E+00 | 2.59E-03 |
| phe.Fasting_rs116708491 S5 | MICA   | rs114032844 S21 | NA          | 1.42E-08 | 5.82E-01 | 1.29E-05    | 1.33E-07 | 1.00E+00 | 1.83E-04 |
| phe.Fasting_rs116708491 S5 | MICA   | rs114565620 S8  | RCL1        | 2.17E-05 | 1.00E+00 | 8.95E-03    | 1.18E-06 | 1.00E+00 | 1.31E-03 |
| phe.Fasting_rs116708491 S5 | MICA   | rs114968018 S21 | NA          | 1.75E-08 | 7.13E-01 | 1.56E-05    | 3.53E-15 | 1.44E-07 | 3.37E-11 |
| phe.Fasting_rs116708491 S5 | MICA   | rs115083290 S19 | NA          | 3.84E-11 | 1.57E-03 | 5.30E-08    | 4.17E-07 | 1.00E+00 | 5.07E-04 |
| phe.Fasting_rs116708491 S5 | MICA   | rs115752779 S19 | NA          | 3.84E-11 | 1.57E-03 | 5.30E-08    | 4.17E-07 | 1.00E+00 | 5.07E-04 |
| phe.Fasting_rs116708491 S5 | MICA   | rs12581352 S2   | NA          | 5.00E-07 | 1        | 3.28E-04    | 1.30E-08 | 5.31E-01 | 2.36E-05 |
| phe.Fasting_rs116708491 S5 | MICA   | rs139070959 S8  | RPN2        | 1.64E-07 | 1        | 1.19E-04    | 7.27E-06 | 1.00E+00 | 6.25E-03 |
| phe.Fasting_rs116708491 S5 | MICA   | rs145412529 S8  | "RBL1,RPS3A | 9.54E-08 | 1        | 7.31E-05    | 7.92E-06 | 1.00E+00 | 6.72E-03 |
| phe.Fasting_rs116708491 S5 | MICA   | rs75350765 S5   | RCL1        | 2.17E-05 | 1        | 0.00894955  | 1.18E-06 | 1.00E+00 | 1.31E-03 |
| phe.Fasting_rs116708491 S5 | MICA   | rs75374128 S5   | CNTLN       | 3.37E-06 | 1.00E+00 | 1.76E-03    | 5.06E-08 | 1.00E+00 | 7.76E-05 |
| phe.Fasting_rs116708491 S5 | MICA   | rs75864203 S8   | CNTLN       | 3.37E-06 | 1.00E+00 | 1.76E-03    | 5.06E-08 | 1.00E+00 | 7.76E-05 |
| phe.Fasting_rs116708491 S5 | MICA   | rs76542405 S5   | SPTLC1      | 1.03E-06 | 1.00E+00 | 6.25E-04    | 5.57E-07 | 1.00E+00 | 6.60E-04 |
| phe.Fasting_rs116708491 S5 | MICA   | rs76844308 S8   | CNTLN       | 1.60E-06 | 1.00E+00 | 9.20E-04    | 5.61E-08 | 1.00E+00 | 8.51E-05 |
| phe.Fasting_rs116708491 S5 | MICA   | rs77523818 S7   | SPTLC1      | 1.03E-06 | 1.00E+00 | 6.25E-04    | 5.57E-07 | 1.00E+00 | 6.60E-04 |
| phe.Fasting_rs116708491 S5 | MICA   | rs78722272 S5   | CNTLN       | 3.37E-06 | 1.00E+00 | 1.76E-03    | 5.26E-08 | 1.00E+00 | 8.05E-05 |
| phe.Fasting_rs11709083 S8  | TRAK1  | rs77845645 S21  | NA          | 3.46E-07 | 1.00E+00 | 2.36E-04    | 2.12E-07 | 1.00E+00 | 2.79E-04 |
| phe.Fasting_rs11762817 S8  | COPG2  | rs116079984 S8  | KPNA3       | 5.27E-06 | 1.00E+00 | 2.61E-03    | 6.48E-10 | 2.64E-02 | 1.63E-06 |
| phe.Fasting_rs11762817 S8  | COPG2  | rs74627895 S8   | TMEM64      | 1.77E-10 | 7.23E-03 | 2.21E-07    | 8.53E-06 | 1.00E+00 | 7.16E-03 |
| phe.Fasting_rs11772632 S8  | COPG2  | rs116079984 S8  | KPNA3       | 5.27E-06 | 1.00E+00 | 2.61E-03    | 6.70E-10 | 2.73E-02 | 1.68E-06 |
| phe.Fasting_rs11772632 S8  | COPG2  | rs74627895 S8   | TMEM64      | 1.77E-10 | 7.23E-03 | 2.21E-07    | 8.70E-06 | 1.00E+00 | 7.28E-03 |
| phe.Fasting_rs11989304 S4  | TMEM64 | rs112348319 S8  | SPTLC1      | 1.78E-07 | 1        | 0.000127529 | 3.54E-06 | 1.00E+00 | 3.38E-03 |
| phe.Fasting_rs11989304 S4  | TMEM64 | rs112608164 S8  | SPTLC1      | 1.78E-07 | 1        | 0.000127529 | 3.54E-06 | 1.00E+00 | 3.38E-03 |
| phe.Fasting_rs11989304 S4  | TMEM64 | rs115787552 S5  | KPNA3       | 1.88E-06 | 1        | 0.00106213  | 3.73E-15 | 1.52E-07 | 3.54E-11 |
| phe.Fasting_rs11989304 S4  | TMEM64 | rs115888477 S8  | NA          | 9.13E-06 | 1        | 0.00422468  | 5.84E-16 | 2.38E-08 | 1.16E-11 |
| phe.Fasting_rs11989304 S4  | TMEM64 | rs116079984 S8  | KPNA3       | 1.88E-06 | 1        | 0.00106213  | 4.41E-15 | 1.80E-07 | 4.10E-11 |
| phe.Fasting_rs11989304 S4  | TMEM64 | rs146815317 S5  | KPNA3       | 1.88E-06 | 1        | 0.00106213  | 3.73E-15 | 1.52E-07 | 3.54E-11 |
| phe.Fasting_rs11989304 S4  | TMEM64 | rs150117838 S8  | KPNA3       | 1.88E-06 | 1.00E+00 | 1.06E-03    | 3.54E-15 | 1.44E-07 | 3.37E-11 |
| phe.Fasting_rs11989304 S4  | TMEM64 | rs73283603 S7   | ZWINT       | 3.14E-16 | 1.28E-08 | 1.04E-12    | 6.26E-09 | 2.55E-01 | 1.22E-05 |
| phe.Fasting_rs11989304 S4  | TMEM64 | rs73392640 S8   | POLR3B      | 1.29E-10 | 5.26E-03 | 1.64E-07    | 9.02E-11 | 3.67E-03 | 2.78E-07 |
| phe.Fasting_rs11989304 S4  | TMEM64 | rs75758702 S24  | NA          | 9.04E-08 | 1.00E+00 | 6.96E-05    | 3.15E-06 | 1.00E+00 | 3.05E-03 |
| phe.Fasting_rs11989304 S4  | TMEM64 | rs76542405 S5   | SPTLC1      | 1.78E-07 | 1.00E+00 | 1.28E-04    | 3.54E-06 | 1.00E+00 | 3.38E-03 |
| phe.Fasting_rs11989304 S4  | TMEM64 | rs77523818 S7   | SPTLC1      | 1.78E-07 | 1.00E+00 | 1.28E-04    | 3.54E-06 | 1.00E+00 | 3.38E-03 |
| phe.Fasting_rs11989304 S4  | TMEM64 | rs77798597 S7   | KPNA3       | 1.88E-06 | 1.00E+00 | 1.06E-03    | 3.54E-15 | 1.44E-07 | 3.37E-11 |
| phe.Fasting_rs11989304 S4  | TMEM64 | rs78736524 S5   | KPNA3       | 1.88E-06 | 1.00E+00 | 1.06E-03    | 3.73E-15 | 1.52E-07 | 3.54E-11 |
| phe.Fasting_rs11989304 S4  | TMEM64 | rs79781495 S8   | KPNA3       | 1.88E-06 | 1.00E+00 | 1.06E-03    | 3.54E-15 | 1.44E-07 | 3.37E-11 |
| phe.Fasting_rs11989304 S4  | TMEM64 | rs80332465 S5   | KPNA3       | 1.90E-06 | 1        | 0.00107061  | 3.82E-15 | 1.55E-07 | 3.60E-11 |
| phe.Fasting_rs11989304 S4  | TMEM64 | rs80334773 S5   | KPNA3       | 1.90E-06 | 1        | 0.00107061  | 3.82E-15 | 1.55E-07 | 3.60E-11 |
| phe.Fasting_rs11989304 S4  | TMEM64 | rs8075478 S8    | MYH10       | 1.56E-07 | 1        | 0.00011375  | 1.07E-06 | 1.00E+00 | 1.20E-03 |
| phe.Fasting_rs12045943 S7  | UBE4B  | rs112348319 S8  | SPTLC1      | 5.95E-06 | 1        | 0.0029039   | 9.31E-07 | 1.00E+00 | 1.06E-03 |

|                        |    |         |             |     |            |          |           |             |          |          |          |
|------------------------|----|---------|-------------|-----|------------|----------|-----------|-------------|----------|----------|----------|
| phe.Fasting_rs12045943 | S7 | UBE4B   | rs112608164 | S8  | SPTLC1     | 5.95E-06 | 1         | 0.0029039   | 9.31E-07 | 1.00E+00 | 1.06E-03 |
| phe.Fasting_rs12045943 | S7 | UBE4B   | rs113568654 | S12 | SPTLC1     | 6.77E-06 | 1         | 0.00326051  | 8.96E-06 | 1.00E+00 | 7.46E-03 |
| phe.Fasting_rs12045943 | S7 | UBE4B   | rs138090701 | S5  | HDAC3      | 2.03E-05 | 1         | 0.00844571  | 1.16E-06 | 1.00E+00 | 1.29E-03 |
| phe.Fasting_rs12045943 | S7 | UBE4B   | rs140524622 | S7  | MRPL10     | 1.61E-09 | 0.0658157 | 1.71E-06    | 2.10E-06 | 1.00E+00 | 2.16E-03 |
| phe.Fasting_rs12045943 | S7 | UBE4B   | rs149716949 | S5  | DIAPH1     | 1.67E-05 | 1.00E+00  | 7.11E-03    | 9.60E-07 | 1.00E+00 | 1.09E-03 |
| phe.Fasting_rs12045943 | S7 | UBE4B   | rs6881310   | S23 | ISL1       | 4.92E-07 | 1.00E+00  | 3.23E-04    | 8.99E-06 | 1.00E+00 | 7.48E-03 |
| phe.Fasting_rs12045943 | S7 | UBE4B   | rs76542405  | S5  | SPTLC1     | 5.95E-06 | 1.00E+00  | 2.90E-03    | 9.31E-07 | 1.00E+00 | 1.06E-03 |
| phe.Fasting_rs12045943 | S7 | UBE4B   | rs77444916  | S23 | LOC642366  | 6.42E-07 | 1.00E+00  | 4.10E-04    | 4.24E-12 | 1.72E-04 | 1.70E-08 |
| phe.Fasting_rs12045943 | S7 | UBE4B   | rs77523818  | S7  | SPTLC1     | 5.95E-06 | 1.00E+00  | 2.90E-03    | 9.31E-07 | 1.00E+00 | 1.06E-03 |
| phe.Fasting_rs12045943 | S7 | UBE4B   | rs77845645  | S21 | NA         | 1.07E-06 | 1.00E+00  | 6.46E-04    | 6.09E-09 | 2.48E-01 | 1.18E-05 |
| phe.Fasting_rs12045943 | S7 | UBE4B   | rs80258830  | S24 | LOC642366  | 6.42E-07 | 1.00E+00  | 4.10E-04    | 4.24E-12 | 1.72E-04 | 1.70E-08 |
| phe.Fasting_rs12332637 | S8 | TNFAIP8 | rs140524622 | S7  | MRPL10     | 9.10E-08 | 1.00E+00  | 7.00E-05    | 8.49E-06 | 1.00E+00 | 7.14E-03 |
| phe.Fasting_rs12488988 | S6 | PHC3    | rs111576333 | S5  | TMEM64     | 2.07E-08 | 8.44E-01  | 1.82E-05    | 2.37E-10 | 9.65E-03 | 6.58E-07 |
| phe.Fasting_rs12488988 | S6 | PHC3    | rs112091318 | S5  | TMEM64     | 6.28E-09 | 2.57E-01  | 6.07E-06    | 3.45E-10 | 1.40E-02 | 9.16E-07 |
| phe.Fasting_rs12488988 | S6 | PHC3    | rs112348319 | S8  | SPTLC1     | 1.92E-05 | 1.00E+00  | 8.06E-03    | 8.00E-10 | 3.26E-02 | 1.96E-06 |
| phe.Fasting_rs12488988 | S6 | PHC3    | rs112608164 | S8  | SPTLC1     | 1.92E-05 | 1         | 8.06E-03    | 8.00E-10 | 3.26E-02 | 1.96E-06 |
| phe.Fasting_rs12488988 | S6 | PHC3    | rs113568654 | S12 | SPTLC1     | 1.84E-05 | 1         | 0.00776102  | 1.06E-08 | 4.30E-01 | 1.94E-05 |
| phe.Fasting_rs12488988 | S6 | PHC3    | rs114565620 | S8  | RCL1       | 2.84E-19 | 1.16E-11  | 2.40E-14    | 4.09E-07 | 1.00E+00 | 4.98E-04 |
| phe.Fasting_rs12488988 | S6 | PHC3    | rs115083290 | S19 | NA         | 8.85E-08 | 1         | 6.83E-05    | 3.47E-09 | 1.41E-01 | 7.24E-06 |
| phe.Fasting_rs12488988 | S6 | PHC3    | rs115752779 | S19 | NA         | 8.85E-08 | 1         | 6.83E-05    | 3.47E-09 | 1.41E-01 | 7.24E-06 |
| phe.Fasting_rs12488988 | S6 | PHC3    | rs115888477 | S8  | NA         | 1.34E-06 | 1         | 0.000791384 | 8.03E-11 | 3.27E-03 | 2.50E-07 |
| phe.Fasting_rs12488988 | S6 | PHC3    | rs116011837 | S9  | BRD2       | 2.70E-13 | 1.10E-05  | 5.81E-10    | 2.12E-11 | 8.63E-04 | 7.46E-08 |
| phe.Fasting_rs12488988 | S6 | PHC3    | rs116120727 | S9  | BRD2       | 2.70E-13 | 1.10E-05  | 5.81E-10    | 2.12E-11 | 8.63E-04 | 7.46E-08 |
| phe.Fasting_rs12488988 | S6 | PHC3    | rs116548615 | S8  | TMEM45B    | 5.29E-19 | 2.16E-11  | 2.49E-14    | 8.09E-10 | 3.29E-02 | 1.97E-06 |
| phe.Fasting_rs12488988 | S6 | PHC3    | rs11989304  | S4  | TMEM64     | 2.07E-08 | 8.44E-01  | 1.82E-05    | 2.35E-10 | 9.56E-03 | 6.52E-07 |
| phe.Fasting_rs12488988 | S6 | PHC3    | rs140524622 | S7  | MRPL10     | 2.30E-08 | 9.39E-01  | 2.01E-05    | 2.18E-06 | 1.00E+00 | 2.23E-03 |
| phe.Fasting_rs12488988 | S6 | PHC3    | rs141926074 | S8  | ATE1       | 1.23E-19 | 5.04E-12  | 2.23E-14    | 1.38E-11 | 5.60E-04 | 5.00E-08 |
| phe.Fasting_rs12488988 | S6 | PHC3    | rs73392640  | S8  | POLR3B     | 6.58E-08 | 1.00E+00  | 5.26E-05    | 9.14E-06 | 1.00E+00 | 7.58E-03 |
| phe.Fasting_rs12488988 | S6 | PHC3    | rs74627895  | S8  | TMEM64     | 6.28E-09 | 2.57E-01  | 6.07E-06    | 1.30E-06 | 1.00E+00 | 1.43E-03 |
| phe.Fasting_rs12488988 | S6 | PHC3    | rs75350765  | S5  | RCL1       | 2.84E-19 | 1.16E-11  | 2.40E-14    | 4.09E-07 | 1.00E+00 | 4.98E-04 |
| phe.Fasting_rs12488988 | S6 | PHC3    | rs75506779  | S5  | TMCO3      | 7.38E-14 | 3.01E-06  | 1.70E-10    | 3.56E-06 | 1.00E+00 | 3.40E-03 |
| phe.Fasting_rs12488988 | S6 | PHC3    | rs75949566  | S5  | TMEM64     | 2.26E-08 | 9.24E-01  | 1.98E-05    | 3.32E-10 | 1.35E-02 | 8.85E-07 |
| phe.Fasting_rs12488988 | S6 | PHC3    | rs76542405  | S5  | SPTLC1     | 1.92E-05 | 1.00E+00  | 8.06E-03    | 8.00E-10 | 3.26E-02 | 1.96E-06 |
| phe.Fasting_rs12488988 | S6 | PHC3    | rs77523818  | S7  | SPTLC1     | 1.92E-05 | 1.00E+00  | 8.06E-03    | 8.00E-10 | 3.26E-02 | 1.96E-06 |
| phe.Fasting_rs12488988 | S6 | PHC3    | rs7763107   | S8  | FARS2      | 1.30E-09 | 5.33E-02  | 1.41E-06    | 2.93E-06 | 1.00E+00 | 2.87E-03 |
| phe.Fasting_rs12488988 | S6 | PHC3    | rs77845645  | S21 | NA         | 9.87E-09 | 4.03E-01  | 9.22E-06    | 1.01E-12 | 4.11E-05 | 4.74E-09 |
| phe.Fasting_rs12488988 | S6 | PHC3    | rs78990344  | S2  | LOC1005063 | 2.07E-08 | 8.44E-01  | 1.82E-05    | 2.35E-10 | 9.56E-03 | 6.52E-07 |
| phe.Fasting_rs12492606 | S8 | PHC3    | rs111576333 | S5  | TMEM64     | 2.07E-08 | 8.44E-01  | 1.82E-05    | 2.31E-10 | 9.41E-03 | 6.43E-07 |
| phe.Fasting_rs12492606 | S8 | PHC3    | rs112091318 | S5  | TMEM64     | 6.28E-09 | 2.57E-01  | 6.07E-06    | 3.37E-10 | 1.37E-02 | 8.96E-07 |
| phe.Fasting_rs12492606 | S8 | PHC3    | rs112348319 | S8  | SPTLC1     | 1.92E-05 | 1.00E+00  | 8.06E-03    | 7.84E-10 | 3.19E-02 | 1.93E-06 |

|                        |    |       |             |     |             |          |          |             |          |          |          |
|------------------------|----|-------|-------------|-----|-------------|----------|----------|-------------|----------|----------|----------|
| phe.Fasting_rs12492606 | S8 | PHC3  | rs112608164 | S8  | SPTLC1      | 1.92E-05 | 1.00E+00 | 8.06E-03    | 7.84E-10 | 3.19E-02 | 1.93E-06 |
| phe.Fasting_rs12492606 | S8 | PHC3  | rs113568654 | S12 | SPTLC1      | 1.84E-05 | 1.00E+00 | 7.76E-03    | 1.04E-08 | 4.21E-01 | 1.91E-05 |
| phe.Fasting_rs12492606 | S8 | PHC3  | rs114565620 | S8  | RCL1        | 2.84E-19 | 1.16E-11 | 2.40E-14    | 4.01E-07 | 1.00E+00 | 4.90E-04 |
| phe.Fasting_rs12492606 | S8 | PHC3  | rs115083290 | S19 | NA          | 8.85E-08 | 1.00E+00 | 6.83E-05    | 3.40E-09 | 1.39E-01 | 7.12E-06 |
| phe.Fasting_rs12492606 | S8 | PHC3  | rs115752779 | S19 | NA          | 8.85E-08 | 1.00E+00 | 6.83E-05    | 3.40E-09 | 1.39E-01 | 7.12E-06 |
| phe.Fasting_rs12492606 | S8 | PHC3  | rs115888477 | S8  | NA          | 1.34E-06 | 1        | 0.000791384 | 7.82E-11 | 3.18E-03 | 2.44E-07 |
| phe.Fasting_rs12492606 | S8 | PHC3  | rs116011837 | S9  | BRD2        | 2.70E-13 | 1.10E-05 | 5.81E-10    | 2.07E-11 | 8.41E-04 | 7.31E-08 |
| phe.Fasting_rs12492606 | S8 | PHC3  | rs116120727 | S9  | BRD2        | 2.70E-13 | 1.10E-05 | 5.81E-10    | 2.07E-11 | 8.41E-04 | 7.31E-08 |
| phe.Fasting_rs12492606 | S8 | PHC3  | rs116548615 | S8  | TMEM45B     | 5.29E-19 | 2.16E-11 | 2.49E-14    | 7.92E-10 | 3.23E-02 | 1.95E-06 |
| phe.Fasting_rs12492606 | S8 | PHC3  | rs11989304  | S4  | TMEM64      | 2.07E-08 | 8.44E-01 | 1.82E-05    | 2.29E-10 | 9.33E-03 | 6.39E-07 |
| phe.Fasting_rs12492606 | S8 | PHC3  | rs140524622 | S7  | MRPL10      | 2.30E-08 | 9.39E-01 | 2.01E-05    | 2.14E-06 | 1.00E+00 | 2.19E-03 |
| phe.Fasting_rs12492606 | S8 | PHC3  | rs141926074 | S8  | ATE1        | 1.23E-19 | 5.04E-12 | 2.23E-14    | 1.34E-11 | 5.46E-04 | 4.89E-08 |
| phe.Fasting_rs12492606 | S8 | PHC3  | rs73392640  | S8  | POLR3B      | 6.58E-08 | 1.00E+00 | 5.26E-05    | 8.97E-06 | 1.00E+00 | 7.47E-03 |
| phe.Fasting_rs12492606 | S8 | PHC3  | rs74627895  | S8  | TMEM64      | 6.28E-09 | 2.57E-01 | 6.07E-06    | 1.27E-06 | 1.00E+00 | 1.40E-03 |
| phe.Fasting_rs12492606 | S8 | PHC3  | rs75350765  | S5  | RCL1        | 2.84E-19 | 1.16E-11 | 2.40E-14    | 4.01E-07 | 1.00E+00 | 4.90E-04 |
| phe.Fasting_rs12492606 | S8 | PHC3  | rs75506779  | S5  | TMCO3       | 7.38E-14 | 3.01E-06 | 1.70E-10    | 3.50E-06 | 1.00E+00 | 3.35E-03 |
| phe.Fasting_rs12492606 | S8 | PHC3  | rs75949566  | S5  | TMEM64      | 2.26E-08 | 9.24E-01 | 1.98E-05    | 3.24E-10 | 1.32E-02 | 8.70E-07 |
| phe.Fasting_rs12492606 | S8 | PHC3  | rs76542405  | S5  | SPTLC1      | 1.92E-05 | 1.00E+00 | 8.06E-03    | 7.84E-10 | 3.19E-02 | 1.93E-06 |
| phe.Fasting_rs12492606 | S8 | PHC3  | rs77523818  | S7  | SPTLC1      | 1.92E-05 | 1.00E+00 | 8.06E-03    | 7.84E-10 | 3.19E-02 | 1.93E-06 |
| phe.Fasting_rs12492606 | S8 | PHC3  | rs7763107   | S8  | FARS2       | 1.30E-09 | 5.33E-02 | 1.41E-06    | 2.87E-06 | 1.00E+00 | 2.82E-03 |
| phe.Fasting_rs12492606 | S8 | PHC3  | rs77845645  | S21 | NA          | 9.87E-09 | 4.03E-01 | 9.22E-06    | 9.90E-13 | 4.03E-05 | 4.68E-09 |
| phe.Fasting_rs12492606 | S8 | PHC3  | rs78990344  | S2  | LOC1005063  | 2.07E-08 | 8.44E-01 | 1.82E-05    | 2.29E-10 | 9.33E-03 | 6.39E-07 |
| phe.Fasting_rs12581352 | S2 | NA    | rs114968018 | S21 | NA          | 3.18E-08 | 1.00E+00 | 2.72E-05    | 1.85E-06 | 1.00E+00 | 1.93E-03 |
| phe.Fasting_rs12581352 | S2 | NA    | rs139070959 | S8  | RPN2        | 1.02E-17 | 4.16E-10 | 9.76E-14    | 6.94E-15 | 2.83E-07 | 6.20E-11 |
| phe.Fasting_rs12581352 | S2 | NA    | rs145412529 | S8  | "RBL1,RPS3A | 5.94E-18 | 2.43E-10 | 7.36E-14    | 7.73E-15 | 3.15E-07 | 6.86E-11 |
| phe.Fasting_rs12581352 | S2 | NA    | rs57503635  | S3  | NA          | 8.95E-17 | 3.65E-09 | 3.87E-13    | 1.78E-06 | 1.00E+00 | 1.87E-03 |
| phe.Fasting_rs13024983 | S8 | MTX2  | rs116011837 | S9  | BRD2        | 1.57E-05 | 1.00E+00 | 6.75E-03    | 5.43E-06 | 1.00E+00 | 4.91E-03 |
| phe.Fasting_rs13024983 | S8 | MTX2  | rs116120727 | S9  | BRD2        | 1.57E-05 | 1.00E+00 | 6.75E-03    | 5.43E-06 | 1.00E+00 | 4.91E-03 |
| phe.Fasting_rs13252117 | S7 | UBE2W | rs139070959 | S8  | RPN2        | 1.23E-06 | 1.00E+00 | 7.29E-04    | 2.05E-07 | 1.00E+00 | 2.70E-04 |
| phe.Fasting_rs13252117 | S7 | UBE2W | rs145412529 | S8  | "RBL1,RPS3A | 6.28E-07 | 1.00E+00 | 4.02E-04    | 1.43E-06 | 1.00E+00 | 1.56E-03 |
| phe.Fasting_rs13277962 | S6 | UBE2W | rs139070959 | S8  | RPN2        | 1.18E-06 | 1.00E+00 | 7.01E-04    | 2.19E-07 | 1.00E+00 | 2.87E-04 |
| phe.Fasting_rs13277962 | S6 | UBE2W | rs145412529 | S8  | "RBL1,RPS3A | 6.02E-07 | 1.00E+00 | 3.88E-04    | 1.54E-06 | 1.00E+00 | 1.65E-03 |
| phe.Fasting_rs13353823 | S8 | MAST4 | rs139070959 | S8  | RPN2        | 1.88E-18 | 7.67E-11 | 3.95E-14    | 2.26E-09 | 9.19E-02 | 4.92E-06 |
| phe.Fasting_rs13353823 | S8 | MAST4 | rs145412529 | S8  | "RBL1,RPS3A | 1.01E-18 | 4.14E-11 | 2.93E-14    | 2.52E-09 | 1.03E-01 | 5.42E-06 |
| phe.Fasting_rs13353823 | S8 | MAST4 | rs2153597   | S8  | ZNF438      | 1.06E-07 | 1.00E+00 | 8.03E-05    | 6.07E-06 | 1.00E+00 | 5.38E-03 |
| phe.Fasting_rs13400525 | S8 | MFF   | rs113357907 | S24 | ISL1        | 1.23E-06 | 1.00E+00 | 7.30E-04    | 1.28E-09 | 5.21E-02 | 2.94E-06 |
| phe.Fasting_rs13400525 | S8 | MFF   | rs114565620 | S8  | RCL1        | 3.62E-18 | 1.48E-10 | 5.68E-14    | 2.21E-06 | 1.00E+00 | 2.25E-03 |
| phe.Fasting_rs13400525 | S8 | MFF   | rs116011837 | S9  | BRD2        | 2.48E-06 | 1.00E+00 | 1.35E-03    | 3.12E-13 | 1.27E-05 | 1.70E-09 |
| phe.Fasting_rs13400525 | S8 | MFF   | rs116120727 | S9  | BRD2        | 2.48E-06 | 1.00E+00 | 1.35E-03    | 3.12E-13 | 1.27E-05 | 1.70E-09 |
| phe.Fasting_rs13400525 | S8 | MFF   | rs139070959 | S8  | RPN2        | 1.11E-17 | 4.53E-10 | 1.02E-13    | 4.11E-10 | 1.67E-02 | 1.08E-06 |

|              |            |    |       |             |     |              |          |          |             |          |          |          |
|--------------|------------|----|-------|-------------|-----|--------------|----------|----------|-------------|----------|----------|----------|
| phe.Fasting_ | rs13400525 | S8 | MFF   | rs141926074 | S8  | ATE1         | 7.89E-14 | 3.22E-06 | 1.81E-10    | 2.66E-09 | 1.08E-01 | 5.71E-06 |
| phe.Fasting_ | rs13400525 | S8 | MFF   | rs145412529 | S8  | "RBL1,RPS3A  | 6.51E-18 | 2.66E-10 | 7.85E-14    | 4.59E-10 | 1.87E-02 | 1.20E-06 |
| phe.Fasting_ | rs13400525 | S8 | MFF   | rs150916187 | S4  | HIST1H2BK    | 5.16E-07 | 1.00E+00 | 3.38E-04    | 1.30E-12 | 5.28E-05 | 5.87E-09 |
| phe.Fasting_ | rs13400525 | S8 | MFF   | rs16894241  | S4  | HIST1H2BK    | 7.57E-07 | 1.00E+00 | 4.74E-04    | 3.52E-12 | 1.43E-04 | 1.48E-08 |
| phe.Fasting_ | rs13400525 | S8 | MFF   | rs2153597   | S8  | ZNF438       | 1.29E-10 | 5.27E-03 | 1.64E-07    | 2.48E-06 | 1.00E+00 | 2.48E-03 |
| phe.Fasting_ | rs13400525 | S8 | MFF   | rs57503635  | S3  | NA           | 1.05E-16 | 4.30E-09 | 4.46E-13    | 2.22E-32 | 9.05E-25 | 4.52E-25 |
| phe.Fasting_ | rs13400525 | S8 | MFF   | rs6881310   | S23 | ISL1         | 6.90E-17 | 2.82E-09 | 3.13E-13    | 1.44E-06 | 1.00E+00 | 1.56E-03 |
| phe.Fasting_ | rs13400525 | S8 | MFF   | rs74701059  | S24 | C17orf102    | 7.65E-06 | 1.00E+00 | 3.62E-03    | 1.92E-07 | 1.00E+00 | 2.55E-04 |
| phe.Fasting_ | rs13400525 | S8 | MFF   | rs75350765  | S5  | RCL1         | 3.62E-18 | 1.48E-10 | 5.68E-14    | 2.21E-06 | 1.00E+00 | 2.25E-03 |
| phe.Fasting_ | rs13400525 | S8 | MFF   | rs75374128  | S5  | CNTLN        | 2.60E-06 | 1.00E+00 | 1.40E-03    | 3.64E-07 | 1.00E+00 | 4.51E-04 |
| phe.Fasting_ | rs13400525 | S8 | MFF   | rs75864203  | S8  | CNTLN        | 2.60E-06 | 1.00E+00 | 1.40E-03    | 3.64E-07 | 1.00E+00 | 4.51E-04 |
| phe.Fasting_ | rs13400525 | S8 | MFF   | rs77444916  | S23 | LOC642366    | 2.28E-17 | 9.31E-10 | 1.45E-13    | 1.22E-09 | 4.98E-02 | 2.86E-06 |
| phe.Fasting_ | rs13400525 | S8 | MFF   | rs77845645  | S21 | NA           | 2.50E-17 | 1.02E-09 | 1.55E-13    | 5.83E-07 | 1.00E+00 | 6.89E-04 |
| phe.Fasting_ | rs13400525 | S8 | MFF   | rs78722272  | S5  | CNTLN        | 2.60E-06 | 1.00E+00 | 1.40E-03    | 3.84E-07 | 1.00E+00 | 4.73E-04 |
| phe.Fasting_ | rs13400525 | S8 | MFF   | rs79703349  | S24 | C17orf102    | 7.65E-06 | 1.00E+00 | 3.62E-03    | 2.50E-07 | 1.00E+00 | 3.23E-04 |
| phe.Fasting_ | rs13400525 | S8 | MFF   | rs80258830  | S24 | LOC642366    | 2.28E-17 | 9.31E-10 | 1.45E-13    | 1.22E-09 | 4.98E-02 | 2.86E-06 |
| phe.Fasting_ | rs13411824 | S5 | LIMS1 | rs112027720 | S7  | DIAPH1       | 2.36E-06 | 1.00E+00 | 1.29E-03    | 4.89E-06 | 1.00E+00 | 4.49E-03 |
| phe.Fasting_ | rs13411824 | S5 | LIMS1 | rs112940854 | S5  | MYO1B        | 2.04E-05 | 1.00E+00 | 8.48E-03    | 7.34E-07 | 1.00E+00 | 8.51E-04 |
| phe.Fasting_ | rs13411824 | S5 | LIMS1 | rs113219478 | S7  | DIAPH1       | 2.36E-06 | 1.00E+00 | 1.29E-03    | 4.89E-06 | 1.00E+00 | 4.49E-03 |
| phe.Fasting_ | rs13411824 | S5 | LIMS1 | rs115888477 | S8  | NA           | 6.37E-07 | 1.00E+00 | 4.07E-04    | 5.18E-06 | 1.00E+00 | 4.72E-03 |
| phe.Fasting_ | rs13411824 | S5 | LIMS1 | rs138090701 | S5  | HDAC3        | 1.16E-06 | 1        | 0.000689146 | 6.51E-06 | 1.00E+00 | 5.71E-03 |
| phe.Fasting_ | rs13411824 | S5 | LIMS1 | rs138136869 | S7  | DIAPH1       | 7.48E-07 | 1        | 0.000468386 | 2.13E-06 | 1.00E+00 | 2.18E-03 |
| phe.Fasting_ | rs13411824 | S5 | LIMS1 | rs138487229 | S11 | DIAPH1       | 2.36E-06 | 1.00E+00 | 1.29E-03    | 4.89E-06 | 1.00E+00 | 4.49E-03 |
| phe.Fasting_ | rs13411824 | S5 | LIMS1 | rs138738950 | S8  | "PCDHGB2,Pi  | 2.36E-06 | 1.00E+00 | 1.29E-03    | 4.88E-06 | 1.00E+00 | 4.48E-03 |
| phe.Fasting_ | rs13411824 | S5 | LIMS1 | rs139297927 | S8  | DIAPH1       | 2.36E-06 | 1.00E+00 | 1.29E-03    | 4.89E-06 | 1.00E+00 | 4.49E-03 |
| phe.Fasting_ | rs13411824 | S5 | LIMS1 | rs139337303 | S8  | DIAPH1       | 2.36E-06 | 1.00E+00 | 1.29E-03    | 4.89E-06 | 1.00E+00 | 4.49E-03 |
| phe.Fasting_ | rs13411824 | S5 | LIMS1 | rs139403963 | S8  | DIAPH1       | 7.48E-07 | 1.00E+00 | 4.68E-04    | 2.13E-06 | 1.00E+00 | 2.18E-03 |
| phe.Fasting_ | rs13411824 | S5 | LIMS1 | rs139621309 | S18 | "LOC10050506 | 2.36E-06 | 1.00E+00 | 1.29E-03    | 4.89E-06 | 1.00E+00 | 4.49E-03 |
| phe.Fasting_ | rs13411824 | S5 | LIMS1 | rs139828110 | S8  | DIAPH1       | 7.48E-07 | 1.00E+00 | 4.68E-04    | 2.13E-06 | 1.00E+00 | 2.18E-03 |
| phe.Fasting_ | rs13411824 | S5 | LIMS1 | rs140070363 | S8  | DIAPH1       | 2.36E-06 | 1.00E+00 | 1.29E-03    | 4.89E-06 | 1.00E+00 | 4.49E-03 |
| phe.Fasting_ | rs13411824 | S5 | LIMS1 | rs140644750 | S13 | DIAPH1       | 2.36E-06 | 1.00E+00 | 1.29E-03    | 4.89E-06 | 1.00E+00 | 4.49E-03 |
| phe.Fasting_ | rs13411824 | S5 | LIMS1 | rs141022544 | S8  | DIAPH1       | 2.36E-06 | 1.00E+00 | 1.29E-03    | 4.89E-06 | 1.00E+00 | 4.49E-03 |
| phe.Fasting_ | rs13411824 | S5 | LIMS1 | rs141525984 | S5  | DIAPH1       | 2.36E-06 | 1.00E+00 | 1.29E-03    | 4.89E-06 | 1.00E+00 | 4.49E-03 |
| phe.Fasting_ | rs13411824 | S5 | LIMS1 | rs142480565 | S8  | DIAPH1       | 2.36E-06 | 1.00E+00 | 1.29E-03    | 4.89E-06 | 1.00E+00 | 4.49E-03 |
| phe.Fasting_ | rs13411824 | S5 | LIMS1 | rs142718558 | S7  | "DIAPH1,LOC  | 2.36E-06 | 1        | 1.29E-03    | 4.89E-06 | 1.00E+00 | 4.49E-03 |
| phe.Fasting_ | rs13411824 | S5 | LIMS1 | rs142789100 | S8  | DIAPH1       | 7.48E-07 | 1        | 4.68E-04    | 2.13E-06 | 1.00E+00 | 2.18E-03 |
| phe.Fasting_ | rs13411824 | S5 | LIMS1 | rs142812798 | S7  | DIAPH1       | 7.48E-07 | 1        | 4.68E-04    | 2.13E-06 | 1.00E+00 | 2.18E-03 |
| phe.Fasting_ | rs13411824 | S5 | LIMS1 | rs143377827 | S13 | "DIAPH1,LOC  | 3.96E-07 | 1        | 2.67E-04    | 1.60E-06 | 1.00E+00 | 1.70E-03 |
| phe.Fasting_ | rs13411824 | S5 | LIMS1 | rs143691978 | S11 | DIAPH1       | 7.48E-07 | 1        | 4.68E-04    | 2.19E-06 | 1.00E+00 | 2.24E-03 |
| phe.Fasting_ | rs13411824 | S5 | LIMS1 | rs144081334 | S11 | DIAPH1       | 7.48E-07 | 1        | 4.68E-04    | 2.19E-06 | 1.00E+00 | 2.24E-03 |

|                        |    |       |                |             |          |   |            |          |          |          |
|------------------------|----|-------|----------------|-------------|----------|---|------------|----------|----------|----------|
| phe.Fasting_rs13411824 | S5 | LIMS1 | rs144613910S8  | DIAPH1      | 2.36E-06 | 1 | 1.29E-03   | 4.89E-06 | 1.00E+00 | 4.49E-03 |
| phe.Fasting_rs13411824 | S5 | LIMS1 | rs145027704S11 | DIAPH1      | 7.48E-07 | 1 | 4.68E-04   | 2.19E-06 | 1.00E+00 | 2.24E-03 |
| phe.Fasting_rs13411824 | S5 | LIMS1 | rs146220673S7  | DIAPH1      | 2.36E-06 | 1 | 1.29E-03   | 4.89E-06 | 1.00E+00 | 4.49E-03 |
| phe.Fasting_rs13411824 | S5 | LIMS1 | rs146622060S13 | DIAPH1      | 7.48E-07 | 1 | 4.68E-04   | 2.19E-06 | 1.00E+00 | 2.24E-03 |
| phe.Fasting_rs13411824 | S5 | LIMS1 | rs146878162S7  | DIAPH1      | 2.36E-06 | 1 | 1.29E-03   | 4.89E-06 | 1.00E+00 | 4.49E-03 |
| phe.Fasting_rs13411824 | S5 | LIMS1 | rs147314451S8  | DIAPH1      | 2.36E-06 | 1 | 1.29E-03   | 4.89E-06 | 1.00E+00 | 4.49E-03 |
| phe.Fasting_rs13411824 | S5 | LIMS1 | rs147417996S7  | DIAPH1      | 7.48E-07 | 1 | 4.68E-04   | 2.19E-06 | 1.00E+00 | 2.24E-03 |
| phe.Fasting_rs13411824 | S5 | LIMS1 | rs147646948S7  | "LOC1005056 | 2.36E-06 | 1 | 1.29E-03   | 4.89E-06 | 1.00E+00 | 4.49E-03 |
| phe.Fasting_rs13411824 | S5 | LIMS1 | rs147677041S8  | DIAPH1      | 7.48E-07 | 1 | 4.68E-04   | 2.13E-06 | 1.00E+00 | 2.18E-03 |
| phe.Fasting_rs13411824 | S5 | LIMS1 | rs148116628S7  | DIAPH1      | 2.36E-06 | 1 | 1.29E-03   | 4.89E-06 | 1.00E+00 | 4.49E-03 |
| phe.Fasting_rs13411824 | S5 | LIMS1 | rs148423011S7  | DIAPH1      | 2.36E-06 | 1 | 1.29E-03   | 4.89E-06 | 1.00E+00 | 4.49E-03 |
| phe.Fasting_rs13411824 | S5 | LIMS1 | rs149019627S8  | DIAPH1      | 7.48E-07 | 1 | 4.68E-04   | 2.13E-06 | 1.00E+00 | 2.18E-03 |
| phe.Fasting_rs13411824 | S5 | LIMS1 | rs149075406S8  | DIAPH1      | 2.36E-06 | 1 | 1.29E-03   | 4.89E-06 | 1.00E+00 | 4.49E-03 |
| phe.Fasting_rs13411824 | S5 | LIMS1 | rs149334783S8  | DIAPH1      | 2.36E-06 | 1 | 1.29E-03   | 4.89E-06 | 1.00E+00 | 4.49E-03 |
| phe.Fasting_rs13411824 | S5 | LIMS1 | rs149791570S5  | DIAPH1      | 7.48E-07 | 1 | 4.68E-04   | 2.13E-06 | 1.00E+00 | 2.18E-03 |
| phe.Fasting_rs13411824 | S5 | LIMS1 | rs150452206S13 | "DIAPH1,LOC | 2.36E-06 | 1 | 1.29E-03   | 4.89E-06 | 1.00E+00 | 4.49E-03 |
| phe.Fasting_rs13411824 | S5 | LIMS1 | rs150675915S7  | DIAPH1      | 2.36E-06 | 1 | 1.29E-03   | 4.89E-06 | 1.00E+00 | 4.49E-03 |
| phe.Fasting_rs13411824 | S5 | LIMS1 | rs150765570S7  | DIAPH1      | 2.36E-06 | 1 | 1.29E-03   | 4.89E-06 | 1.00E+00 | 4.49E-03 |
| phe.Fasting_rs13411824 | S5 | LIMS1 | rs150992994S11 | "PCDHGA5,PI | 2.38E-06 | 1 | 1.30E-03   | 2.01E-06 | 1.00E+00 | 2.08E-03 |
| phe.Fasting_rs13411824 | S5 | LIMS1 | rs151204700S8  | DIAPH1      | 2.36E-06 | 1 | 1.29E-03   | 4.89E-06 | 1.00E+00 | 4.49E-03 |
| phe.Fasting_rs13411824 | S5 | LIMS1 | rs151330468S8  | DIAPH1      | 7.48E-07 | 1 | 4.68E-04   | 2.19E-06 | 1.00E+00 | 2.24E-03 |
| phe.Fasting_rs13411824 | S5 | LIMS1 | rs16833551 S5  | MYO1B       | 2.18E-05 | 1 | 8.98E-03   | 1.22E-07 | 1.00E+00 | 1.70E-04 |
| phe.Fasting_rs13411824 | S5 | LIMS1 | rs180772028S8  | "DIAPH1,LOC | 2.36E-06 | 1 | 1.29E-03   | 4.89E-06 | 1.00E+00 | 4.49E-03 |
| phe.Fasting_rs13411824 | S5 | LIMS1 | rs181224861S7  | DIAPH1      | 2.36E-06 | 1 | 1.29E-03   | 4.89E-06 | 1.00E+00 | 4.49E-03 |
| phe.Fasting_rs13411824 | S5 | LIMS1 | rs182714699S8  | DIAPH1      | 2.36E-06 | 1 | 1.29E-03   | 4.89E-06 | 1.00E+00 | 4.49E-03 |
| phe.Fasting_rs13411824 | S5 | LIMS1 | rs182965141S8  | DIAPH1      | 8.60E-07 | 1 | 5.29E-04   | 1.37E-06 | 1.00E+00 | 1.50E-03 |
| phe.Fasting_rs13411824 | S5 | LIMS1 | rs183597049S7  | DIAPH1      | 2.36E-06 | 1 | 1.29E-03   | 4.89E-06 | 1.00E+00 | 4.49E-03 |
| phe.Fasting_rs13411824 | S5 | LIMS1 | rs183980988S2  | NA          | 2.36E-06 | 1 | 1.29E-03   | 4.89E-06 | 1.00E+00 | 4.49E-03 |
| phe.Fasting_rs13411824 | S5 | LIMS1 | rs184233232S7  | DIAPH1      | 2.36E-06 | 1 | 1.29E-03   | 4.89E-06 | 1.00E+00 | 4.49E-03 |
| phe.Fasting_rs13411824 | S5 | LIMS1 | rs184509477S13 | "PCDHGB4,PI | 2.36E-06 | 1 | 1.29E-03   | 4.89E-06 | 1.00E+00 | 4.49E-03 |
| phe.Fasting_rs13411824 | S5 | LIMS1 | rs185069296S15 | "LOC1005056 | 2.36E-06 | 1 | 1.29E-03   | 4.89E-06 | 1.00E+00 | 4.49E-03 |
| phe.Fasting_rs13411824 | S5 | LIMS1 | rs185502834S8  | DIAPH1      | 7.48E-07 | 1 | 4.68E-04   | 2.13E-06 | 1.00E+00 | 2.18E-03 |
| phe.Fasting_rs13411824 | S5 | LIMS1 | rs185759881S7  | DIAPH1      | 2.36E-06 | 1 | 1.29E-03   | 4.89E-06 | 1.00E+00 | 4.49E-03 |
| phe.Fasting_rs13411824 | S5 | LIMS1 | rs187000011S11 | DIAPH1      | 2.36E-06 | 1 | 1.29E-03   | 4.89E-06 | 1.00E+00 | 4.49E-03 |
| phe.Fasting_rs13411824 | S5 | LIMS1 | rs188981295S5  | "RPS27AP10, | 2.36E-06 | 1 | 1.29E-03   | 4.89E-06 | 1.00E+00 | 4.49E-03 |
| phe.Fasting_rs13411824 | S5 | LIMS1 | rs190559574S7  | DIAPH1      | 7.48E-07 | 1 | 4.68E-04   | 2.13E-06 | 1.00E+00 | 2.18E-03 |
| phe.Fasting_rs13411824 | S5 | LIMS1 | rs191544043S8  | DIAPH1      | 2.36E-06 | 1 | 0.00129052 | 4.89E-06 | 1.00E+00 | 4.49E-03 |
| phe.Fasting_rs13411824 | S5 | LIMS1 | rs191766712S7  | DIAPH1      | 2.36E-06 | 1 | 0.00129052 | 4.89E-06 | 1.00E+00 | 4.49E-03 |
| phe.Fasting_rs13411824 | S5 | LIMS1 | rs192690040S7  | DIAPH1      | 2.36E-06 | 1 | 0.00129052 | 4.89E-06 | 1.00E+00 | 4.49E-03 |
| phe.Fasting_rs13411824 | S5 | LIMS1 | rs192765219S7  | DIAPH1      | 2.36E-06 | 1 | 0.00129052 | 4.89E-06 | 1.00E+00 | 4.49E-03 |

|                         |    |       |             |     |           |          |             |             |          |          |          |
|-------------------------|----|-------|-------------|-----|-----------|----------|-------------|-------------|----------|----------|----------|
| phe.Fasting_rs13411824  | S5 | LIMS1 | rs192770525 | S7  | DIAPH1    | 2.36E-06 | 1           | 0.00129052  | 4.89E-06 | 1.00E+00 | 4.49E-03 |
| phe.Fasting_rs13411824  | S5 | LIMS1 | rs35990401  | S7  | DIAPH1    | 4.77E-06 | 1           | 0.00238879  | 1.13E-06 | 1.00E+00 | 1.26E-03 |
| phe.Fasting_rs13411824  | S5 | LIMS1 | rs55900860  | S7  | DIAPH1    | 7.48E-07 | 1           | 0.000468386 | 2.13E-06 | 1.00E+00 | 2.18E-03 |
| phe.Fasting_rs13411824  | S5 | LIMS1 | rs61613048  | S8  | MYO1B     | 2.25E-05 | 1           | 0.00923407  | 3.79E-07 | 1.00E+00 | 4.69E-04 |
| phe.Fasting_rs13411824  | S5 | LIMS1 | rs73058677  | S5  | MYO1B     | 2.04E-05 | 1           | 0.00847867  | 1.94E-07 | 1.00E+00 | 2.57E-04 |
| phe.Fasting_rs138090701 | S5 | HDAC3 | rs1000115   | S5  | LPAR1     | 1.19E-05 | 1           | 0.00529204  | 2.34E-06 | 1.00E+00 | 2.37E-03 |
| phe.Fasting_rs138090701 | S5 | HDAC3 | rs111576333 | S5  | TMEM64    | 3.85E-07 | 1           | 0.00026032  | 5.81E-09 | 2.37E-01 | 1.14E-05 |
| phe.Fasting_rs138090701 | S5 | HDAC3 | rs112089881 | S8  | ZFAND4    | 1.49E-05 | 1           | 0.00645033  | 8.09E-10 | 3.29E-02 | 1.97E-06 |
| phe.Fasting_rs138090701 | S5 | HDAC3 | rs112091318 | S5  | TMEM64    | 1.15E-07 | 1           | 8.65E-05    | 3.54E-08 | 1.00E+00 | 5.64E-05 |
| phe.Fasting_rs138090701 | S5 | HDAC3 | rs114334325 | S7  | AP3M2     | 6.04E-16 | 2.47E-08    | 1.87E-12    | 3.43E-07 | 1.00E+00 | 4.27E-04 |
| phe.Fasting_rs138090701 | S5 | HDAC3 | rs114394395 | S7  | AP3M2     | 6.51E-16 | 2.66E-08    | 2.00E-12    | 3.43E-07 | 1.00E+00 | 4.27E-04 |
| phe.Fasting_rs138090701 | S5 | HDAC3 | rs114565620 | S8  | RCL1      | 1.22E-07 | 1           | 9.15E-05    | 3.31E-08 | 1.00E+00 | 5.30E-05 |
| phe.Fasting_rs138090701 | S5 | HDAC3 | rs115083290 | S19 | NA        | 5.71E-17 | 2.33E-09    | 2.73E-13    | 1.17E-08 | 4.77E-01 | 2.14E-05 |
| phe.Fasting_rs138090701 | S5 | HDAC3 | rs11524145  | S5  | CDK6      | 8.61E-08 | 1           | 6.67E-05    | 7.00E-06 | 1.00E+00 | 6.07E-03 |
| phe.Fasting_rs138090701 | S5 | HDAC3 | rs115305957 | S23 | NA        | 1.88E-05 | 1           | 0.00789798  | 1.02E-08 | 4.15E-01 | 1.89E-05 |
| phe.Fasting_rs138090701 | S5 | HDAC3 | rs115752779 | S19 | NA        | 5.71E-17 | 2.33E-09    | 2.73E-13    | 1.17E-08 | 4.77E-01 | 2.14E-05 |
| phe.Fasting_rs138090701 | S5 | HDAC3 | rs115787552 | S5  | KPNA3     | 4.18E-16 | 1.71E-08    | 1.35E-12    | 1.29E-10 | 5.26E-03 | 3.89E-07 |
| phe.Fasting_rs138090701 | S5 | HDAC3 | rs115888477 | S8  | NA        | 3.16E-15 | 1.29E-07    | 8.58E-12    | 1.17E-11 | 4.75E-04 | 4.28E-08 |
| phe.Fasting_rs138090701 | S5 | HDAC3 | rs116011837 | S9  | BRD2      | 5.65E-12 | 0.000230913 | 9.97E-09    | 1.74E-13 | 7.08E-06 | 9.84E-10 |
| phe.Fasting_rs138090701 | S5 | HDAC3 | rs116079984 | S8  | KPNA3     | 4.18E-16 | 1.71E-08    | 1.35E-12    | 1.42E-10 | 5.79E-03 | 4.27E-07 |
| phe.Fasting_rs138090701 | S5 | HDAC3 | rs116120727 | S9  | BRD2      | 5.65E-12 | 2.31E-04    | 9.97E-09    | 1.74E-13 | 7.08E-06 | 9.84E-10 |
| phe.Fasting_rs138090701 | S5 | HDAC3 | rs116406581 | S2  | NA        | 2.66E-15 | 1.09E-07    | 7.46E-12    | 2.06E-07 | 1.00E+00 | 2.71E-04 |
| phe.Fasting_rs138090701 | S5 | HDAC3 | rs116548615 | S8  | TMEM45B   | 2.13E-17 | 8.70E-10    | 1.43E-13    | 1.27E-11 | 5.16E-04 | 4.64E-08 |
| phe.Fasting_rs138090701 | S5 | HDAC3 | rs116696844 | S3  | AP3M2     | 9.55E-16 | 3.90E-08    | 2.84E-12    | 3.43E-07 | 1.00E+00 | 4.27E-04 |
| phe.Fasting_rs138090701 | S5 | HDAC3 | rs11989304  | S4  | TMEM64    | 3.85E-07 | 1           | 0.00026032  | 2.57E-07 | 1.00E+00 | 3.30E-04 |
| phe.Fasting_rs138090701 | S5 | HDAC3 | rs140524622 | S7  | MRPL10    | 1.47E-17 | 6.01E-10    | 1.17E-13    | 7.87E-06 | 1.00E+00 | 6.68E-03 |
| phe.Fasting_rs138090701 | S5 | HDAC3 | rs146815317 | S5  | KPNA3     | 4.18E-16 | 1.71E-08    | 1.35E-12    | 1.29E-10 | 5.26E-03 | 3.89E-07 |
| phe.Fasting_rs138090701 | S5 | HDAC3 | rs1470889   | S5  | ZC3H3     | 1.42E-05 | 1           | 0.00617517  | 2.30E-14 | 9.37E-07 | 1.79E-10 |
| phe.Fasting_rs138090701 | S5 | HDAC3 | rs1470890   | S5  | ZC3H3     | 1.42E-05 | 1           | 0.00617517  | 2.30E-14 | 9.37E-07 | 1.79E-10 |
| phe.Fasting_rs138090701 | S5 | HDAC3 | rs150117838 | S8  | KPNA3     | 4.18E-16 | 1.71E-08    | 1.35E-12    | 1.21E-10 | 4.94E-03 | 3.67E-07 |
| phe.Fasting_rs138090701 | S5 | HDAC3 | rs16894241  | S4  | HIST1H2BK | 1.01E-07 | 1           | 7.67E-05    | 2.97E-14 | 1.21E-06 | 2.22E-10 |
| phe.Fasting_rs138090701 | S5 | HDAC3 | rs2153597   | S8  | ZNF438    | 6.37E-10 | 0.0260027   | 7.17E-07    | 8.96E-06 | 1.00E+00 | 7.46E-03 |
| phe.Fasting_rs138090701 | S5 | HDAC3 | rs2924507   | S5  | ZC3H3     | 1.42E-05 | 1           | 0.00617517  | 2.30E-14 | 9.37E-07 | 1.79E-10 |
| phe.Fasting_rs138090701 | S5 | HDAC3 | rs2924508   | S8  | ZC3H3     | 1.42E-05 | 1           | 0.00617517  | 3.24E-14 | 1.32E-06 | 2.38E-10 |
| phe.Fasting_rs138090701 | S5 | HDAC3 | rs2924511   | S7  | ZC3H3     | 1.42E-05 | 1           | 0.00617517  | 3.22E-14 | 1.31E-06 | 2.36E-10 |
| phe.Fasting_rs138090701 | S5 | HDAC3 | rs2924512   | S7  | ZC3H3     | 1.53E-05 | 1           | 0.00661914  | 4.39E-14 | 1.79E-06 | 3.05E-10 |
| phe.Fasting_rs138090701 | S5 | HDAC3 | rs2955503   | S22 | NA        | 1.54E-05 | 1           | 0.00663194  | 4.90E-09 | 1.99E-01 | 9.78E-06 |
| phe.Fasting_rs138090701 | S5 | HDAC3 | rs2956376   | S8  | ZC3H3     | 1.42E-05 | 1           | 0.00617517  | 2.11E-14 | 8.59E-07 | 1.68E-10 |
| phe.Fasting_rs138090701 | S5 | HDAC3 | rs2980270   | S7  | ZC3H3     | 1.42E-05 | 1           | 0.00617517  | 2.11E-14 | 8.59E-07 | 1.68E-10 |
| phe.Fasting_rs138090701 | S5 | HDAC3 | rs2980272   | S7  | ZC3H3     | 1.53E-05 | 1           | 0.00661914  | 4.85E-14 | 1.98E-06 | 3.36E-10 |

|                           |        |             |     |             |          |          |             |          |          |          |
|---------------------------|--------|-------------|-----|-------------|----------|----------|-------------|----------|----------|----------|
| phe.Fasting_rs138090701S5 | HDAC3  | rs2980275   | S5  | ZC3H3       | 1.42E-05 | 1        | 0.00617517  | 2.30E-14 | 9.37E-07 | 1.79E-10 |
| phe.Fasting_rs138090701S5 | HDAC3  | rs352346    | S3  | GRPEL2      | 2.28E-07 | 1        | 0.000160433 | 1.50E-06 | 1.00E+00 | 1.62E-03 |
| phe.Fasting_rs138090701S5 | HDAC3  | rs366767    | S5  | ZC3H3       | 2.28E-05 | 1        | 0.00933365  | 2.15E-14 | 8.73E-07 | 1.71E-10 |
| phe.Fasting_rs138090701S5 | HDAC3  | rs57503635  | S3  | NA          | 8.68E-17 | 3.54E-09 | 3.77E-13    | 2.76E-14 | 1.12E-06 | 2.08E-10 |
| phe.Fasting_rs138090701S5 | HDAC3  | rs60011869  | S16 | NA          | 1.42E-06 | 1        | 0.000828846 | 7.80E-07 | 1.00E+00 | 9.00E-04 |
| phe.Fasting_rs138090701S5 | HDAC3  | rs7004597   | S8  | NA          | 6.04E-16 | 2.47E-08 | 1.87E-12    | 2.04E-07 | 1.00E+00 | 2.69E-04 |
| phe.Fasting_rs138090701S5 | HDAC3  | rs7256517   | S7  | CYTH2       | 8.61E-07 | 1        | 0.000528926 | 6.03E-12 | 2.45E-04 | 2.33E-08 |
| phe.Fasting_rs138090701S5 | HDAC3  | rs73283603  | S7  | ZWINT       | 2.94E-07 | 1        | 0.000203416 | 6.07E-08 | 1.00E+00 | 9.14E-05 |
| phe.Fasting_rs138090701S5 | HDAC3  | rs73392640  | S8  | POLR3B      | 9.94E-07 | 1        | 0.000603058 | 4.55E-11 | 1.85E-03 | 1.48E-07 |
| phe.Fasting_rs138090701S5 | HDAC3  | rs734069    | S19 | NA          | 2.75E-06 | 1        | 0.00146922  | 2.15E-08 | 8.73E-01 | 3.66E-05 |
| phe.Fasting_rs138090701S5 | HDAC3  | rs73619637  | S8  | NA          | 1.31E-16 | 5.37E-09 | 5.26E-13    | 4.64E-09 | 1.89E-01 | 9.30E-06 |
| phe.Fasting_rs138090701S5 | HDAC3  | rs74627895  | S8  | TMEM64      | 1.15E-07 | 1        | 8.65E-05    | 1.82E-08 | 7.41E-01 | 3.16E-05 |
| phe.Fasting_rs138090701S5 | HDAC3  | rs74701059  | S24 | C17orf102   | 1.87E-05 | 1        | 0.00786942  | 1.48E-08 | 6.03E-01 | 2.63E-05 |
| phe.Fasting_rs138090701S5 | HDAC3  | rs74914207  | S24 | NA          | 1.99E-07 | 1        | 0.000141711 | 3.84E-09 | 1.56E-01 | 7.91E-06 |
| phe.Fasting_rs138090701S5 | HDAC3  | rs75350765  | S5  | RCL1        | 1.22E-07 | 1        | 9.15E-05    | 3.31E-08 | 1.00E+00 | 5.30E-05 |
| phe.Fasting_rs138090701S5 | HDAC3  | rs75758702  | S24 | NA          | 1.08E-07 | 1        | 8.18E-05    | 1.54E-10 | 6.26E-03 | 4.54E-07 |
| phe.Fasting_rs138090701S5 | HDAC3  | rs75949566  | S5  | TMEM64      | 4.46E-07 | 1        | 0.000295516 | 3.09E-07 | 1.00E+00 | 3.89E-04 |
| phe.Fasting_rs138090701S5 | HDAC3  | rs7763107   | S8  | FARS2       | 7.46E-17 | 3.04E-09 | 3.33E-13    | 8.38E-12 | 3.41E-04 | 3.15E-08 |
| phe.Fasting_rs138090701S5 | HDAC3  | rs77798597  | S7  | KPNA3       | 4.18E-16 | 1.71E-08 | 1.35E-12    | 1.21E-10 | 4.94E-03 | 3.67E-07 |
| phe.Fasting_rs138090701S5 | HDAC3  | rs77845645  | S21 | NA          | 2.22E-07 | 1        | 0.00015696  | 9.07E-08 | 1.00E+00 | 1.30E-04 |
| phe.Fasting_rs138090701S5 | HDAC3  | rs78353402  | S8  | AP3M2       | 6.04E-16 | 2.47E-08 | 1.87E-12    | 3.43E-07 | 1.00E+00 | 4.27E-04 |
| phe.Fasting_rs138090701S5 | HDAC3  | rs78516788  | S8  | SLC38A1     | 2.01E-05 | 1        | 0.00837876  | 1.36E-08 | 5.52E-01 | 2.44E-05 |
| phe.Fasting_rs138090701S5 | HDAC3  | rs78697063  | S5  | MSI2        | 8.01E-10 | 0.032698 | 8.88E-07    | 2.64E-07 | 1.00E+00 | 3.39E-04 |
| phe.Fasting_rs138090701S5 | HDAC3  | rs78736524  | S5  | KPNA3       | 4.18E-16 | 1.71E-08 | 1.35E-12    | 1.29E-10 | 5.26E-03 | 3.89E-07 |
| phe.Fasting_rs138090701S5 | HDAC3  | rs78990344  | S2  | LOC10050631 | 3.85E-07 | 1        | 0.00026032  | 2.57E-07 | 1.00E+00 | 3.30E-04 |
| phe.Fasting_rs138090701S5 | HDAC3  | rs79703349  | S24 | C17orf102   | 1.87E-05 | 1.00E+00 | 7.87E-03    | 1.82E-08 | 7.41E-01 | 3.17E-05 |
| phe.Fasting_rs138090701S5 | HDAC3  | rs79781495  | S8  | KPNA3       | 4.18E-16 | 1.71E-08 | 1.35E-12    | 1.21E-10 | 4.94E-03 | 3.67E-07 |
| phe.Fasting_rs138090701S5 | HDAC3  | rs79886603  | S15 | NA          | 9.13E-09 | 3.73E-01 | 8.60E-06    | 3.87E-07 | 1.00E+00 | 4.75E-04 |
| phe.Fasting_rs138090701S5 | HDAC3  | rs80200953  | S8  | PPP2R5D     | 9.02E-08 | 1.00E+00 | 6.94E-05    | 4.17E-09 | 1.70E-01 | 8.52E-06 |
| phe.Fasting_rs138090701S5 | HDAC3  | rs8024871   | S8  | RAB8B       | 1.10E-05 | 1        | 0.00498752  | 6.62E-06 | 1.00E+00 | 5.79E-03 |
| phe.Fasting_rs138090701S5 | HDAC3  | rs80332465  | S5  | KPNA3       | 4.42E-16 | 1.80E-08 | 1.42E-12    | 1.29E-10 | 5.24E-03 | 3.88E-07 |
| phe.Fasting_rs138090701S5 | HDAC3  | rs80334773  | S5  | KPNA3       | 4.42E-16 | 1.80E-08 | 1.42E-12    | 1.29E-10 | 5.24E-03 | 3.88E-07 |
| phe.Fasting_rs138136869S7 | DIAPH1 | rs111576333 | S5  | TMEM64      | 5.56E-07 | 1        | 0.000361481 | 7.80E-15 | 3.17E-07 | 6.90E-11 |
| phe.Fasting_rs138136869S7 | DIAPH1 | rs112089881 | S8  | ZFAND4      | 3.24E-18 | 1.32E-10 | 5.45E-14    | 1.95E-10 | 7.96E-03 | 5.56E-07 |
| phe.Fasting_rs138136869S7 | DIAPH1 | rs112091318 | S5  | TMEM64      | 1.64E-07 | 1        | 0.000118218 | 9.13E-09 | 3.72E-01 | 1.72E-05 |
| phe.Fasting_rs138136869S7 | DIAPH1 | rs114334325 | S7  | AP3M2       | 1.25E-15 | 5.12E-08 | 3.65E-12    | 8.81E-08 | 1.00E+00 | 1.26E-04 |
| phe.Fasting_rs138136869S7 | DIAPH1 | rs114394395 | S7  | AP3M2       | 1.33E-15 | 5.44E-08 | 3.85E-12    | 8.81E-08 | 1.00E+00 | 1.26E-04 |
| phe.Fasting_rs138136869S7 | DIAPH1 | rs114565620 | S8  | RCL1        | 2.03E-17 | 8.30E-10 | 1.43E-13    | 8.23E-09 | 3.35E-01 | 1.57E-05 |
| phe.Fasting_rs138136869S7 | DIAPH1 | rs115083290 | S19 | NA          | 8.17E-17 | 3.34E-09 | 3.58E-13    | 2.77E-09 | 1.13E-01 | 5.90E-06 |
| phe.Fasting_rs138136869S7 | DIAPH1 | rs115752779 | S19 | NA          | 8.17E-17 | 3.34E-09 | 3.58E-13    | 2.77E-09 | 1.13E-01 | 5.90E-06 |

|                           |        |                |           |          |             |             |          |          |          |
|---------------------------|--------|----------------|-----------|----------|-------------|-------------|----------|----------|----------|
| phe.Fasting_rs138136869S7 | DIAPH1 | rs115787552S5  | KPNA3     | 5.05E-16 | 2.06E-08    | 1.59E-12    | 2.34E-14 | 9.53E-07 | 1.79E-10 |
| phe.Fasting_rs138136869S7 | DIAPH1 | rs115888477S8  | NA        | 3.68E-15 | 1.50E-07    | 9.90E-12    | 4.11E-15 | 1.67E-07 | 3.84E-11 |
| phe.Fasting_rs138136869S7 | DIAPH1 | rs116011837S9  | BRD2      | 9.60E-12 | 0.000392176 | 1.53E-08    | 9.05E-15 | 3.68E-07 | 7.90E-11 |
| phe.Fasting_rs138136869S7 | DIAPH1 | rs116079984S8  | KPNA3     | 5.05E-16 | 2.06E-08    | 1.59E-12    | 2.56E-14 | 1.04E-06 | 1.94E-10 |
| phe.Fasting_rs138136869S7 | DIAPH1 | rs116120727S9  | BRD2      | 9.60E-12 | 3.92E-04    | 1.53E-08    | 9.05E-15 | 3.68E-07 | 7.90E-11 |
| phe.Fasting_rs138136869S7 | DIAPH1 | rs116406581S2  | NA        | 5.24E-15 | 2.14E-07    | 1.36E-11    | 5.32E-08 | 1.00E+00 | 8.11E-05 |
| phe.Fasting_rs138136869S7 | DIAPH1 | rs116548615S8  | TMEM45B   | 2.95E-17 | 1.21E-09    | 1.69E-13    | 1.76E-12 | 7.17E-05 | 7.72E-09 |
| phe.Fasting_rs138136869S7 | DIAPH1 | rs116696844S3  | AP3M2     | 1.90E-15 | 7.75E-08    | 5.41E-12    | 8.81E-08 | 1.00E+00 | 1.26E-04 |
| phe.Fasting_rs138136869S7 | DIAPH1 | rs11989304 S4  | TMEM64    | 5.56E-07 | 1.00E+00    | 3.61E-04    | 1.11E-11 | 4.53E-04 | 4.10E-08 |
| phe.Fasting_rs138136869S7 | DIAPH1 | rs140524622S7  | MRPL10    | 1.81E-17 | 7.37E-10    | 1.32E-13    | 2.83E-06 | 1.00E+00 | 1.27E-03 |
| phe.Fasting_rs138136869S7 | DIAPH1 | rs146815317S5  | KPNA3     | 5.05E-16 | 2.06E-08    | 1.59E-12    | 2.34E-14 | 9.53E-07 | 1.79E-10 |
| phe.Fasting_rs138136869S7 | DIAPH1 | rs150117838S8  | KPNA3     | 5.05E-16 | 2.06E-08    | 1.59E-12    | 2.16E-14 | 8.80E-07 | 1.71E-10 |
| phe.Fasting_rs138136869S7 | DIAPH1 | rs150916187S4  | HIST1H2BK | 4.14E-06 | 1.00E+00    | 2.11E-03    | 2.61E-15 | 1.06E-07 | 2.55E-11 |
| phe.Fasting_rs138136869S7 | DIAPH1 | rs16894241 S4  | HIST1H2BK | 3.73E-12 | 1.52E-04    | 6.73E-09    | 6.62E-15 | 2.69E-07 | 5.94E-11 |
| phe.Fasting_rs138136869S7 | DIAPH1 | rs34801978 S3  | HOXB2     | 2.19E-06 | 1.00E+00    | 1.21E-03    | 1.65E-09 | 6.71E-02 | 3.72E-06 |
| phe.Fasting_rs138136869S7 | DIAPH1 | rs4732511 S13  | POR       | 9.61E-15 | 3.93E-07    | 2.45E-11    | 2.36E-06 | 1.00E+00 | 2.39E-03 |
| phe.Fasting_rs138136869S7 | DIAPH1 | rs57503635 S3  | NA        | 1.28E-16 | 5.23E-09    | 5.19E-13    | 6.61E-15 | 2.69E-07 | 5.94E-11 |
| phe.Fasting_rs138136869S7 | DIAPH1 | rs60011869 S16 | NA        | 2.13E-06 | 1.00E+00    | 1.18E-03    | 1.78E-07 | 1.00E+00 | 2.39E-04 |
| phe.Fasting_rs138136869S7 | DIAPH1 | rs6964407 S7   | POR       | 3.32E-14 | 1.36E-06    | 8.04E-11    | 2.16E-06 | 1.00E+00 | 2.22E-03 |
| phe.Fasting_rs138136869S7 | DIAPH1 | rs7004597 S8   | NA        | 1.25E-15 | 5.12E-08    | 3.65E-12    | 5.12E-08 | 1.00E+00 | 7.84E-05 |
| phe.Fasting_rs138136869S7 | DIAPH1 | rs7256517 S7   | CYTH2     | 1.59E-16 | 6.48E-09    | 6.03E-13    | 9.69E-13 | 3.95E-05 | 4.59E-09 |
| phe.Fasting_rs138136869S7 | DIAPH1 | rs73283603 S7  | ZWINT     | 4.49E-07 | 1.00E+00    | 2.97E-04    | 4.53E-08 | 1.00E+00 | 7.02E-05 |
| phe.Fasting_rs138136869S7 | DIAPH1 | rs73392640 S8  | POLR3B    | 4.58E-11 | 1.87E-03    | 6.24E-08    | 6.82E-12 | 2.78E-04 | 2.62E-08 |
| phe.Fasting_rs138136869S7 | DIAPH1 | rs73619637 S8  | NA        | 2.00E-16 | 8.15E-09    | 6.95E-13    | 6.35E-08 | 1.00E+00 | 9.54E-05 |
| phe.Fasting_rs138136869S7 | DIAPH1 | rs74627895 S8  | TMEM64    | 1.64E-07 | 1.00E+00    | 1.18E-04    | 4.42E-09 | 1.80E-01 | 8.98E-06 |
| phe.Fasting_rs138136869S7 | DIAPH1 | rs74914207 S24 | NA        | 2.89E-11 | 0.00117833  | 4.13E-08    | 1.56E-11 | 6.34E-04 | 5.60E-08 |
| phe.Fasting_rs138136869S7 | DIAPH1 | rs75350765 S5  | RCL1      | 2.03E-17 | 8.30E-10    | 1.43E-13    | 8.23E-09 | 3.35E-01 | 1.57E-05 |
| phe.Fasting_rs138136869S7 | DIAPH1 | rs75374128 S5  | CNTLN     | 5.25E-06 | 1           | 0.00259743  | 1.83E-08 | 7.47E-01 | 3.18E-05 |
| phe.Fasting_rs138136869S7 | DIAPH1 | rs75506779 S5  | TMCO3     | 1.04E-07 | 1           | 7.88E-05    | 2.32E-09 | 9.43E-02 | 5.04E-06 |
| phe.Fasting_rs138136869S7 | DIAPH1 | rs75758702 S24 | NA        | 1.04E-17 | 4.25E-10    | 9.89E-14    | 2.85E-11 | 1.16E-03 | 9.77E-08 |
| phe.Fasting_rs138136869S7 | DIAPH1 | rs75864203 S8  | CNTLN     | 5.25E-06 | 1           | 0.00259743  | 1.83E-08 | 7.47E-01 | 3.18E-05 |
| phe.Fasting_rs138136869S7 | DIAPH1 | rs75949566 S5  | TMEM64    | 6.52E-07 | 1           | 0.000415514 | 1.49E-11 | 6.08E-04 | 5.38E-08 |
| phe.Fasting_rs138136869S7 | DIAPH1 | rs76844308 S8  | CNTLN     | 2.67E-06 | 1           | 0.00143908  | 1.80E-08 | 7.34E-01 | 3.14E-05 |
| phe.Fasting_rs138136869S7 | DIAPH1 | rs7763107 S8   | FARS2     | 9.44E-17 | 3.86E-09    | 4.06E-13    | 1.60E-12 | 6.52E-05 | 7.13E-09 |
| phe.Fasting_rs138136869S7 | DIAPH1 | rs77798597 S7  | KPNA3     | 5.05E-16 | 2.06E-08    | 1.59E-12    | 2.16E-14 | 8.80E-07 | 1.71E-10 |
| phe.Fasting_rs138136869S7 | DIAPH1 | rs77845645 S21 | NA        | 3.35E-07 | 1           | 0.000229183 | 1.04E-11 | 4.24E-04 | 3.85E-08 |
| phe.Fasting_rs138136869S7 | DIAPH1 | rs78353402 S8  | AP3M2     | 1.25E-15 | 5.12E-08    | 3.65E-12    | 8.81E-08 | 1.00E+00 | 1.26E-04 |
| phe.Fasting_rs138136869S7 | DIAPH1 | rs78516788 S8  | SLC38A1   | 1.24E-06 | 1           | 0.000737575 | 2.76E-09 | 1.12E-01 | 5.89E-06 |
| phe.Fasting_rs138136869S7 | DIAPH1 | rs78697063 S5  | MSI2      | 7.77E-20 | 3.17E-12    | 2.23E-14    | 1.45E-10 | 5.92E-03 | 4.35E-07 |
| phe.Fasting_rs138136869S7 | DIAPH1 | rs78703708 S7  | FAF2      | 7.40E-12 | 0.000302252 | 1.27E-08    | 7.08E-06 | 1.00E+00 | 6.12E-03 |



|              |             |     |        |             |     |            |          |            |             |          |          |          |
|--------------|-------------|-----|--------|-------------|-----|------------|----------|------------|-------------|----------|----------|----------|
| phe.Fasting_ | rs138136869 | S7  | DIAPH1 | rs78722272  | S5  | CNTLN      | 5.25E-06 | 1          | 0.00259743  | 1.89E-08 | 7.67E-01 | 3.26E-05 |
| phe.Fasting_ | rs138136869 | S7  | DIAPH1 | rs78736524  | S5  | KPNA3      | 5.05E-16 | 2.06E-08   | 1.59E-12    | 2.34E-14 | 9.53E-07 | 1.79E-10 |
| phe.Fasting_ | rs138136869 | S7  | DIAPH1 | rs78990344  | S2  | LOC1005063 | 5.56E-07 | 1          | 0.000361481 | 1.11E-11 | 4.53E-04 | 4.10E-08 |
| phe.Fasting_ | rs138136869 | S7  | DIAPH1 | rs79781495  | S8  | KPNA3      | 5.05E-16 | 2.06E-08   | 1.59E-12    | 2.16E-14 | 8.80E-07 | 1.71E-10 |
| phe.Fasting_ | rs138136869 | S7  | DIAPH1 | rs80200953  | S8  | PPP2R5D    | 1.41E-17 | 5.76E-10   | 1.14E-13    | 8.37E-10 | 3.41E-02 | 2.03E-06 |
| phe.Fasting_ | rs138136869 | S7  | DIAPH1 | rs80332465  | S5  | KPNA3      | 5.36E-16 | 2.19E-08   | 1.67E-12    | 2.32E-14 | 9.45E-07 | 1.79E-10 |
| phe.Fasting_ | rs138136869 | S7  | DIAPH1 | rs80334773  | S5  | KPNA3      | 5.36E-16 | 2.19E-08   | 1.67E-12    | 2.32E-14 | 9.45E-07 | 1.79E-10 |
| phe.Fasting_ | rs138136869 | S7  | DIAPH1 | rs891061    | S7  | POP4       | 6.59E-07 | 1          | 0.000419527 | 1.19E-05 | 1.00E+00 | 9.35E-03 |
| phe.Fasting_ | rs138457103 | S10 | DIAPH1 | rs111576333 | S5  | TMEM64     | 1.54E-06 | 1          | 0.000893483 | 4.98E-14 | 2.03E-06 | 3.45E-10 |
| phe.Fasting_ | rs138457103 | S10 | DIAPH1 | rs112089881 | S8  | ZFAND4     | 1.10E-17 | 4.48E-10   | 1.01E-13    | 8.78E-10 | 3.57E-02 | 2.12E-06 |
| phe.Fasting_ | rs138457103 | S10 | DIAPH1 | rs112091318 | S5  | TMEM64     | 4.68E-07 | 1          | 3.09E-04    | 3.64E-08 | 1.00E+00 | 5.77E-05 |
| phe.Fasting_ | rs138457103 | S10 | DIAPH1 | rs114334325 | S7  | AP3M2      | 3.11E-15 | 1.27E-07   | 8.49E-12    | 2.82E-07 | 1.00E+00 | 3.59E-04 |
| phe.Fasting_ | rs138457103 | S10 | DIAPH1 | rs114394395 | S7  | AP3M2      | 3.32E-15 | 1.36E-07   | 9.01E-12    | 2.82E-07 | 1.00E+00 | 3.59E-04 |
| phe.Fasting_ | rs138457103 | S10 | DIAPH1 | rs114565620 | S8  | RCL1       | 8.65E-17 | 3.53E-09   | 3.75E-13    | 3.32E-08 | 1.00E+00 | 5.31E-05 |
| phe.Fasting_ | rs138457103 | S10 | DIAPH1 | rs115083290 | S19 | NA         | 2.56E-16 | 1.04E-08   | 8.66E-13    | 1.24E-08 | 5.03E-01 | 2.25E-05 |
| phe.Fasting_ | rs138457103 | S10 | DIAPH1 | rs115752779 | S19 | NA         | 2.56E-16 | 1.04E-08   | 8.66E-13    | 1.24E-08 | 5.03E-01 | 2.25E-05 |
| phe.Fasting_ | rs138457103 | S10 | DIAPH1 | rs115787552 | S5  | KPNA3      | 1.71E-15 | 7.00E-08   | 4.90E-12    | 1.02E-13 | 4.14E-06 | 6.47E-10 |
| phe.Fasting_ | rs138457103 | S10 | DIAPH1 | rs115888477 | S8  | NA         | 1.18E-14 | 4.83E-07   | 3.01E-11    | 1.96E-14 | 7.99E-07 | 1.58E-10 |
| phe.Fasting_ | rs138457103 | S10 | DIAPH1 | rs116011837 | S9  | BRD2       | 2.95E-11 | 0.00120633 | 4.18E-08    | 2.52E-14 | 1.02E-06 | 1.91E-10 |
| phe.Fasting_ | rs138457103 | S10 | DIAPH1 | rs116079984 | S8  | KPNA3      | 1.71E-15 | 7.00E-08   | 4.90E-12    | 1.13E-13 | 4.62E-06 | 7.01E-10 |
| phe.Fasting_ | rs138457103 | S10 | DIAPH1 | rs116120727 | S9  | BRD2       | 2.95E-11 | 0.00120633 | 4.18E-08    | 2.52E-14 | 1.02E-06 | 1.91E-10 |
| phe.Fasting_ | rs138457103 | S10 | DIAPH1 | rs116406581 | S2  | NA         | 1.27E-14 | 5.19E-07   | 3.22E-11    | 1.67E-07 | 1.00E+00 | 2.26E-04 |
| phe.Fasting_ | rs138457103 | S10 | DIAPH1 | rs116548615 | S8  | TMEM45B    | 9.91E-17 | 4.05E-09   | 4.23E-13    | 2.20E-09 | 8.97E-02 | 4.82E-06 |
| phe.Fasting_ | rs138457103 | S10 | DIAPH1 | rs116696844 | S3  | AP3M2      | 4.82E-15 | 1.97E-07   | 1.26E-11    | 2.82E-07 | 1.00E+00 | 3.59E-04 |
| phe.Fasting_ | rs138457103 | S10 | DIAPH1 | rs11989304  | S4  | TMEM64     | 1.54E-06 | 1          | 8.93E-04    | 5.94E-11 | 2.42E-03 | 1.90E-07 |
| phe.Fasting_ | rs138457103 | S10 | DIAPH1 | rs140524622 | S7  | MRPL10     | 6.28E-17 | 2.56E-09   | 2.90E-13    | 7.60E-06 | 1.00E+00 | 6.49E-03 |
| phe.Fasting_ | rs138457103 | S10 | DIAPH1 | rs146815317 | S5  | KPNA3      | 1.71E-15 | 7.00E-08   | 4.90E-12    | 1.02E-13 | 4.14E-06 | 6.47E-10 |
| phe.Fasting_ | rs138457103 | S10 | DIAPH1 | rs150117838 | S8  | KPNA3      | 1.71E-15 | 7.00E-08   | 4.90E-12    | 9.90E-14 | 4.03E-06 | 6.40E-10 |
| phe.Fasting_ | rs138457103 | S10 | DIAPH1 | rs16894241  | S4  | HIST1H2BK  | 9.15E-07 | 1          | 5.59E-04    | 3.12E-14 | 1.27E-06 | 2.32E-10 |
| phe.Fasting_ | rs138457103 | S10 | DIAPH1 | rs2153597   | S8  | ZNF438     | 3.03E-11 | 0.00123592 | 4.28E-08    | 5.35E-08 | 1.00E+00 | 8.15E-05 |
| phe.Fasting_ | rs138457103 | S10 | DIAPH1 | rs34801978  | S3  | HOXB2      | 7.50E-06 | 1          | 3.56E-03    | 1.18E-07 | 1.00E+00 | 1.64E-04 |
| phe.Fasting_ | rs138457103 | S10 | DIAPH1 | rs57503635  | S3  | NA         | 3.60E-16 | 1.47E-08   | 1.18E-12    | 2.95E-14 | 1.20E-06 | 2.20E-10 |
| phe.Fasting_ | rs138457103 | S10 | DIAPH1 | rs60011869  | S16 | NA         | 6.26E-06 | 1          | 3.04E-03    | 6.44E-10 | 2.62E-02 | 1.62E-06 |
| phe.Fasting_ | rs138457103 | S10 | DIAPH1 | rs7004597   | S8  | NA         | 3.11E-15 | 1.27E-07   | 8.49E-12    | 1.68E-07 | 1.00E+00 | 2.27E-04 |
| phe.Fasting_ | rs138457103 | S10 | DIAPH1 | rs7256517   | S7  | CYTH2      | 6.10E-16 | 2.49E-08   | 1.89E-12    | 7.13E-10 | 2.90E-02 | 1.77E-06 |
| phe.Fasting_ | rs138457103 | S10 | DIAPH1 | rs73283603  | S7  | ZWINT      | 1.27E-06 | 1          | 7.51E-04    | 2.10E-07 | 1.00E+00 | 2.76E-04 |
| phe.Fasting_ | rs138457103 | S10 | DIAPH1 | rs73392640  | S8  | POLR3B     | 1.25E-10 | 0.00508581 | 1.59E-07    | 5.02E-09 | 2.04E-01 | 1.00E-05 |
| phe.Fasting_ | rs138457103 | S10 | DIAPH1 | rs734069    | S19 | NA         | 1.84E-06 | 1          | 1.04E-03    | 9.23E-10 | 3.76E-02 | 2.20E-06 |
| phe.Fasting_ | rs138457103 | S10 | DIAPH1 | rs73619637  | S8  | NA         | 7.71E-16 | 3.15E-08   | 2.35E-12    | 1.95E-10 | 7.93E-03 | 5.55E-07 |
| phe.Fasting_ | rs138457103 | S10 | DIAPH1 | rs74627895  | S8  | TMEM64     | 4.68E-07 | 1          | 3.09E-04    | 1.87E-08 | 7.60E-01 | 3.23E-05 |

|                             |        |                 |             |          |             |          |          |          |          |
|-----------------------------|--------|-----------------|-------------|----------|-------------|----------|----------|----------|----------|
| phe.Fasting_rs138457103 S10 | DIAPH1 | rs74914207 S24  | NA          | 8.07E-11 | 0.00329638  | 1.06E-07 | 1.19E-10 | 4.84E-03 | 3.60E-07 |
| phe.Fasting_rs138457103 S10 | DIAPH1 | rs75350765 S5   | RCL1        | 8.65E-17 | 3.53E-09    | 3.75E-13 | 3.32E-08 | 1.00E+00 | 5.31E-05 |
| phe.Fasting_rs138457103 S10 | DIAPH1 | rs75374128 S5   | CNTLN       | 7.78E-17 | 3.18E-09    | 3.45E-13 | 8.71E-08 | 1.00E+00 | 1.25E-04 |
| phe.Fasting_rs138457103 S10 | DIAPH1 | rs75758702 S24  | NA          | 3.96E-17 | 1.62E-09    | 2.13E-13 | 1.49E-10 | 6.07E-03 | 4.45E-07 |
| phe.Fasting_rs138457103 S10 | DIAPH1 | rs75864203 S8   | CNTLN       | 7.78E-17 | 3.18E-09    | 3.45E-13 | 8.71E-08 | 1.00E+00 | 1.25E-04 |
| phe.Fasting_rs138457103 S10 | DIAPH1 | rs75949566 S5   | TMEM64      | 1.80E-06 | 1           | 1.02E-03 | 7.49E-11 | 3.05E-03 | 2.34E-07 |
| phe.Fasting_rs138457103 S10 | DIAPH1 | rs76844308 S8   | CNTLN       | 4.08E-17 | 1.66E-09    | 2.16E-13 | 8.19E-08 | 1.00E+00 | 1.18E-04 |
| phe.Fasting_rs138457103 S10 | DIAPH1 | rs7763107 S8    | FARS2       | 3.51E-16 | 1.44E-08    | 1.15E-12 | 8.67E-12 | 3.53E-04 | 3.26E-08 |
| phe.Fasting_rs138457103 S10 | DIAPH1 | rs77798597 S7   | KPNA3       | 1.71E-15 | 7.00E-08    | 4.90E-12 | 9.90E-14 | 4.03E-06 | 6.40E-10 |
| phe.Fasting_rs138457103 S10 | DIAPH1 | rs77845645 S21  | NA          | 9.25E-07 | 1           | 5.65E-04 | 3.00E-09 | 1.22E-01 | 6.36E-06 |
| phe.Fasting_rs138457103 S10 | DIAPH1 | rs78353402 S8   | AP3M2       | 3.11E-15 | 1.27E-07    | 8.49E-12 | 2.82E-07 | 1.00E+00 | 3.59E-04 |
| phe.Fasting_rs138457103 S10 | DIAPH1 | rs78516788 S8   | SLC38A1     | 1.62E-11 | 0.000660642 | 2.47E-08 | 2.25E-10 | 9.16E-03 | 6.30E-07 |
| phe.Fasting_rs138457103 S10 | DIAPH1 | rs78697063 S5   | MSI2        | 3.69E-19 | 1.51E-11    | 2.40E-14 | 6.70E-10 | 2.73E-02 | 1.68E-06 |
| phe.Fasting_rs138457103 S10 | DIAPH1 | rs78722272 S5   | CNTLN       | 7.78E-17 | 3.18E-09    | 3.45E-13 | 9.08E-08 | 1.00E+00 | 1.30E-04 |
| phe.Fasting_rs138457103 S10 | DIAPH1 | rs78736524 S5   | KPNA3       | 1.71E-15 | 7.00E-08    | 4.90E-12 | 1.02E-13 | 4.14E-06 | 6.47E-10 |
| phe.Fasting_rs138457103 S10 | DIAPH1 | rs78990344 S2   | LOC10050631 | 1.54E-06 | 1           | 8.93E-04 | 5.94E-11 | 2.42E-03 | 1.90E-07 |
| phe.Fasting_rs138457103 S10 | DIAPH1 | rs79781495 S8   | KPNA3       | 1.71E-15 | 7.00E-08    | 4.90E-12 | 9.90E-14 | 4.03E-06 | 6.40E-10 |
| phe.Fasting_rs138457103 S10 | DIAPH1 | rs79886603 S15  | NA          | 5.23E-08 | 1           | 4.27E-05 | 3.41E-07 | 1.00E+00 | 4.25E-04 |
| phe.Fasting_rs138457103 S10 | DIAPH1 | rs80200953 S8   | PPP2R5D     | 4.65E-17 | 1.90E-09    | 2.35E-13 | 4.04E-09 | 1.65E-01 | 8.29E-06 |
| phe.Fasting_rs138457103 S10 | DIAPH1 | rs80332465 S5   | KPNA3       | 1.81E-15 | 7.41E-08    | 5.18E-12 | 1.07E-13 | 4.34E-06 | 6.76E-10 |
| phe.Fasting_rs138457103 S10 | DIAPH1 | rs80334773 S5   | KPNA3       | 1.81E-15 | 7.41E-08    | 5.18E-12 | 1.07E-13 | 4.34E-06 | 6.76E-10 |
| phe.Fasting_rs138487229 S11 | DIAPH1 | rs111576333 S5  | TMEM64      | 2.37E-06 | 1           | 1.30E-03 | 5.87E-14 | 2.39E-06 | 3.99E-10 |
| phe.Fasting_rs138487229 S11 | DIAPH1 | rs112089881 S8  | ZFAND4      | 2.04E-17 | 8.32E-10    | 1.43E-13 | 1.09E-09 | 4.45E-02 | 2.58E-06 |
| phe.Fasting_rs138487229 S11 | DIAPH1 | rs112091318 S5  | TMEM64      | 7.32E-07 | 1           | 4.60E-04 | 3.91E-08 | 1.00E+00 | 6.13E-05 |
| phe.Fasting_rs138487229 S11 | DIAPH1 | rs114334325 S7  | AP3M2       | 4.51E-15 | 1.84E-07    | 1.18E-11 | 3.87E-07 | 1.00E+00 | 4.75E-04 |
| phe.Fasting_rs138487229 S11 | DIAPH1 | rs114394395 S7  | AP3M2       | 4.81E-15 | 1.97E-07    | 1.25E-11 | 3.87E-07 | 1.00E+00 | 4.75E-04 |
| phe.Fasting_rs138487229 S11 | DIAPH1 | rs114565620 S8  | RCL1        | 1.82E-16 | 7.42E-09    | 6.37E-13 | 3.70E-08 | 1.00E+00 | 5.84E-05 |
| phe.Fasting_rs138487229 S11 | DIAPH1 | rs115083290 S19 | NA          | 4.38E-16 | 1.79E-08    | 1.40E-12 | 1.42E-08 | 5.77E-01 | 2.53E-05 |
| phe.Fasting_rs138487229 S11 | DIAPH1 | rs11524145 S5   | CDK6        | 7.80E-07 | 1           | 4.86E-04 | 7.89E-06 | 1.00E+00 | 6.69E-03 |
| phe.Fasting_rs138487229 S11 | DIAPH1 | rs115752779 S19 | NA          | 4.38E-16 | 1.79E-08    | 1.40E-12 | 1.42E-08 | 5.77E-01 | 2.53E-05 |
| phe.Fasting_rs138487229 S11 | DIAPH1 | rs115787552 S5  | KPNA3       | 2.97E-15 | 1.21E-07    | 8.14E-12 | 1.18E-13 | 4.80E-06 | 7.06E-10 |
| phe.Fasting_rs138487229 S11 | DIAPH1 | rs115888477 S8  | NA          | 2.03E-14 | 8.28E-07    | 5.02E-11 | 2.21E-14 | 8.99E-07 | 1.73E-10 |
| phe.Fasting_rs138487229 S11 | DIAPH1 | rs116011837 S9  | BRD2        | 4.89E-11 | 0.00199774  | 6.62E-08 | 4.07E-14 | 1.66E-06 | 2.85E-10 |
| phe.Fasting_rs138487229 S11 | DIAPH1 | rs116079984 S8  | KPNA3       | 2.97E-15 | 1.21E-07    | 8.14E-12 | 1.24E-13 | 5.04E-06 | 7.34E-10 |
| phe.Fasting_rs138487229 S11 | DIAPH1 | rs116120727 S9  | BRD2        | 4.89E-11 | 0.00199774  | 6.62E-08 | 4.07E-14 | 1.66E-06 | 2.85E-10 |
| phe.Fasting_rs138487229 S11 | DIAPH1 | rs116406581 S2  | NA          | 1.81E-14 | 7.39E-07    | 4.52E-11 | 2.35E-07 | 1.00E+00 | 3.05E-04 |
| phe.Fasting_rs138487229 S11 | DIAPH1 | rs116548615 S8  | TMEM45B     | 1.73E-16 | 7.06E-09    | 6.15E-13 | 8.70E-12 | 3.54E-04 | 3.26E-08 |
| phe.Fasting_rs138487229 S11 | DIAPH1 | rs116696844 S3  | AP3M2       | 6.92E-15 | 2.83E-07    | 1.78E-11 | 3.87E-07 | 1.00E+00 | 4.75E-04 |
| phe.Fasting_rs138487229 S11 | DIAPH1 | rs11989304 S4   | TMEM64      | 2.37E-06 | 1           | 1.30E-03 | 6.78E-11 | 2.76E-03 | 2.13E-07 |
| phe.Fasting_rs138487229 S11 | DIAPH1 | rs140524622 S7  | MRPL10      | 1.08E-16 | 4.41E-09    | 4.54E-13 | 7.35E-06 | 1.00E+00 | 6.31E-03 |

|                            |        |                |             |          |             |          |          |          |          |
|----------------------------|--------|----------------|-------------|----------|-------------|----------|----------|----------|----------|
| phe.Fasting_rs138487229S11 | DIAPH1 | rs146815317 S5 | KPNA3       | 2.97E-15 | 1.21E-07    | 8.14E-12 | 1.18E-13 | 4.80E-06 | 7.06E-10 |
| phe.Fasting_rs138487229S11 | DIAPH1 | rs150117838 S8 | KPNA3       | 2.97E-15 | 1.21E-07    | 8.14E-12 | 1.09E-13 | 4.44E-06 | 6.79E-10 |
| phe.Fasting_rs138487229S11 | DIAPH1 | rs150916187 S4 | HIST1H2BK   | 1.38E-05 | 1           | 6.05E-03 | 1.37E-14 | 5.59E-07 | 1.16E-10 |
| phe.Fasting_rs138487229S11 | DIAPH1 | rs16894241 S4  | HIST1H2BK   | 1.99E-11 | 0.000812315 | 2.96E-08 | 3.44E-14 | 1.40E-06 | 2.50E-10 |
| phe.Fasting_rs138487229S11 | DIAPH1 | rs2032062 S8   | NA          | 1.22E-14 | 4.98E-07    | 3.09E-11 | 8.48E-06 | 1.00E+00 | 7.14E-03 |
| phe.Fasting_rs138487229S11 | DIAPH1 | rs2153597 S8   | ZNF438      | 5.51E-11 | 0.00224928  | 7.42E-08 | 4.52E-09 | 1.84E-01 | 9.08E-06 |
| phe.Fasting_rs138487229S11 | DIAPH1 | rs2835656 S7   | TTC3        | 3.01E-10 | 0.0122766   | 3.60E-07 | 9.12E-06 | 1.00E+00 | 7.57E-03 |
| phe.Fasting_rs138487229S11 | DIAPH1 | rs34801978 S3  | HOXB2       | 1.23E-05 | 1           | 5.46E-03 | 1.03E-08 | 4.19E-01 | 1.90E-05 |
| phe.Fasting_rs138487229S11 | DIAPH1 | rs352346 S3    | GRPEL2      | 1.85E-11 | 0.000754995 | 2.78E-08 | 8.42E-06 | 1.00E+00 | 7.10E-03 |
| phe.Fasting_rs138487229S11 | DIAPH1 | rs3750898 S8   | DCLRE1A     | 2.29E-05 | 1           | 9.35E-03 | 8.76E-06 | 1.00E+00 | 7.32E-03 |
| phe.Fasting_rs138487229S11 | DIAPH1 | rs4732511 S13  | POR         | 2.30E-15 | 9.39E-08    | 6.48E-12 | 9.65E-06 | 1.00E+00 | 7.93E-03 |
| phe.Fasting_rs138487229S11 | DIAPH1 | rs57503635 S3  | NA          | 6.34E-16 | 2.59E-08    | 1.95E-12 | 3.17E-14 | 1.29E-06 | 2.34E-10 |
| phe.Fasting_rs138487229S11 | DIAPH1 | rs58905476 S7  | TTC3        | 3.29E-10 | 1.34E-02    | 3.90E-07 | 9.79E-06 | 1.00E+00 | 8.01E-03 |
| phe.Fasting_rs138487229S11 | DIAPH1 | rs60011869 S16 | NA          | 1.04E-05 | 1.00E+00    | 4.72E-03 | 8.16E-10 | 3.32E-02 | 1.98E-06 |
| phe.Fasting_rs138487229S11 | DIAPH1 | rs6964407 S7   | POR         | 7.55E-15 | 3.08E-07    | 1.94E-11 | 8.91E-06 | 1.00E+00 | 7.43E-03 |
| phe.Fasting_rs138487229S11 | DIAPH1 | rs7004597 S8   | NA          | 4.51E-15 | 1.84E-07    | 1.18E-11 | 2.34E-07 | 1.00E+00 | 3.04E-04 |
| phe.Fasting_rs138487229S11 | DIAPH1 | rs7256517 S7   | CYTH2       | 1.04E-15 | 4.24E-08    | 3.06E-12 | 4.82E-12 | 1.96E-04 | 1.91E-08 |
| phe.Fasting_rs138487229S11 | DIAPH1 | rs73283603 S7  | ZWINT       | 1.90E-06 | 1.00E+00    | 1.07E-03 | 2.03E-07 | 1.00E+00 | 2.68E-04 |
| phe.Fasting_rs138487229S11 | DIAPH1 | rs73392640 S8  | POLR3B      | 2.02E-10 | 8.26E-03    | 2.49E-07 | 5.19E-11 | 2.11E-03 | 1.67E-07 |
| phe.Fasting_rs138487229S11 | DIAPH1 | rs734069 S19   | NA          | 2.06E-08 | 8.39E-01    | 1.81E-05 | 6.71E-10 | 2.73E-02 | 1.68E-06 |
| phe.Fasting_rs138487229S11 | DIAPH1 | rs73619637 S8  | NA          | 1.44E-15 | 5.89E-08    | 4.14E-12 | 2.05E-10 | 8.34E-03 | 5.78E-07 |
| phe.Fasting_rs138487229S11 | DIAPH1 | rs74627895 S8  | TMEM64      | 7.32E-07 | 1.00E+00    | 4.60E-04 | 2.03E-08 | 8.28E-01 | 3.48E-05 |
| phe.Fasting_rs138487229S11 | DIAPH1 | rs74914207 S24 | NA          | 1.37E-10 | 5.59E-03    | 1.73E-07 | 9.12E-11 | 3.71E-03 | 2.80E-07 |
| phe.Fasting_rs138487229S11 | DIAPH1 | rs75350765 S5  | RCL1        | 1.82E-16 | 7.42E-09    | 6.37E-13 | 3.70E-08 | 1.00E+00 | 5.84E-05 |
| phe.Fasting_rs138487229S11 | DIAPH1 | rs75374128 S5  | CNTLN       | 1.47E-16 | 6.01E-09    | 5.72E-13 | 1.01E-07 | 1.00E+00 | 1.42E-04 |
| phe.Fasting_rs138487229S11 | DIAPH1 | rs75506779 S5  | TMCO3       | 5.55E-07 | 1.00E+00    | 3.61E-04 | 1.10E-08 | 4.50E-01 | 2.03E-05 |
| phe.Fasting_rs138487229S11 | DIAPH1 | rs75758702 S24 | NA          | 7.02E-17 | 2.87E-09    | 3.16E-13 | 1.57E-10 | 6.38E-03 | 4.59E-07 |
| phe.Fasting_rs138487229S11 | DIAPH1 | rs75864203 S8  | CNTLN       | 1.47E-16 | 6.01E-09    | 5.72E-13 | 1.01E-07 | 1.00E+00 | 1.42E-04 |
| phe.Fasting_rs138487229S11 | DIAPH1 | rs75949566 S5  | TMEM64      | 2.76E-06 | 1.00E+00    | 1.47E-03 | 8.48E-11 | 3.45E-03 | 2.62E-07 |
| phe.Fasting_rs138487229S11 | DIAPH1 | rs76844308 S8  | CNTLN       | 7.68E-17 | 3.14E-09    | 3.41E-13 | 9.52E-08 | 1.00E+00 | 1.35E-04 |
| phe.Fasting_rs138487229S11 | DIAPH1 | rs7763107 S8   | FARS2       | 5.78E-16 | 2.36E-08    | 1.79E-12 | 9.23E-12 | 3.76E-04 | 3.44E-08 |
| phe.Fasting_rs138487229S11 | DIAPH1 | rs77798597 S7  | KPNA3       | 2.97E-15 | 1.21E-07    | 8.14E-12 | 1.09E-13 | 4.44E-06 | 6.79E-10 |
| phe.Fasting_rs138487229S11 | DIAPH1 | rs77845645 S21 | NA          | 1.53E-06 | 1.00E+00    | 8.88E-04 | 4.20E-11 | 1.71E-03 | 1.38E-07 |
| phe.Fasting_rs138487229S11 | DIAPH1 | rs78353402 S8  | AP3M2       | 4.51E-15 | 1.84E-07    | 1.18E-11 | 3.87E-07 | 1.00E+00 | 4.75E-04 |
| phe.Fasting_rs138487229S11 | DIAPH1 | rs78516788 S8  | SLC38A1     | 2.75E-11 | 1.12E-03    | 3.94E-08 | 2.44E-10 | 9.93E-03 | 6.74E-07 |
| phe.Fasting_rs138487229S11 | DIAPH1 | rs78697063 S5  | MSI2        | 8.23E-19 | 3.36E-11    | 2.70E-14 | 6.84E-10 | 2.78E-02 | 1.70E-06 |
| phe.Fasting_rs138487229S11 | DIAPH1 | rs78722272 S5  | CNTLN       | 1.47E-16 | 6.01E-09    | 5.72E-13 | 1.05E-07 | 1.00E+00 | 1.48E-04 |
| phe.Fasting_rs138487229S11 | DIAPH1 | rs78736524 S5  | KPNA3       | 2.97E-15 | 1.21E-07    | 8.14E-12 | 1.18E-13 | 4.80E-06 | 7.06E-10 |
| phe.Fasting_rs138487229S11 | DIAPH1 | rs78990344 S2  | LOC10050631 | 2.37E-06 | 1.00E+00    | 1.30E-03 | 6.78E-11 | 2.76E-03 | 2.13E-07 |
| phe.Fasting_rs138487229S11 | DIAPH1 | rs79781495 S8  | KPNA3       | 2.97E-15 | 1.21E-07    | 8.14E-12 | 1.09E-13 | 4.44E-06 | 6.79E-10 |

|              |             |     |           |               |     |           |          |             |            |          |          |          |
|--------------|-------------|-----|-----------|---------------|-----|-----------|----------|-------------|------------|----------|----------|----------|
| phe.Fasting_ | rs138487229 | S11 | DIAPH1    | rs79886603    | S15 | NA        | 8.71E-08 | 1.00E+00    | 6.74E-05   | 4.66E-07 | 1.00E+00 | 5.59E-04 |
| phe.Fasting_ | rs138487229 | S11 | DIAPH1    | rs80200953    | S8  | PPP2R5D   | 8.49E-17 | 3.47E-09    | 3.69E-13   | 3.65E-09 | 1.48E-01 | 7.55E-06 |
| phe.Fasting_ | rs138487229 | S11 | DIAPH1    | rs80332465    | S5  | KPNA3     | 3.13E-15 | 1.28E-07    | 8.51E-12   | 1.17E-13 | 4.77E-06 | 7.06E-10 |
| phe.Fasting_ | rs138487229 | S11 | DIAPH1    | rs80334773    | S5  | KPNA3     | 3.13E-15 | 1.28E-07    | 8.51E-12   | 1.17E-13 | 4.77E-06 | 7.06E-10 |
| phe.Fasting_ | rs138738950 | S8  | "PCDHGB2, | Pirs111576333 | S5  | TMEM64    | 2.37E-06 | 1.00E+00    | 1.30E-03   | 5.95E-14 | 2.42E-06 | 4.04E-10 |
| phe.Fasting_ | rs138738950 | S8  | "PCDHGB2, | Pirs112089881 | S8  | ZFAND4    | 2.04E-17 | 8.32E-10    | 1.43E-13   | 1.09E-09 | 4.43E-02 | 2.58E-06 |
| phe.Fasting_ | rs138738950 | S8  | "PCDHGB2, | Pirs112091318 | S5  | TMEM64    | 7.32E-07 | 1.00E+00    | 4.60E-04   | 3.90E-08 | 1.00E+00 | 6.13E-05 |
| phe.Fasting_ | rs138738950 | S8  | "PCDHGB2, | Pirs114334325 | S7  | AP3M2     | 4.51E-15 | 1.84E-07    | 1.18E-11   | 3.81E-07 | 1.00E+00 | 4.70E-04 |
| phe.Fasting_ | rs138738950 | S8  | "PCDHGB2, | Pirs114394395 | S7  | AP3M2     | 4.81E-15 | 1.97E-07    | 1.25E-11   | 3.81E-07 | 1.00E+00 | 4.70E-04 |
| phe.Fasting_ | rs138738950 | S8  | "PCDHGB2, | Pirs114565620 | S8  | RCL1      | 1.82E-16 | 7.42E-09    | 6.37E-13   | 3.68E-08 | 1.00E+00 | 5.84E-05 |
| phe.Fasting_ | rs138738950 | S8  | "PCDHGB2, | Pirs115083290 | S19 | NA        | 4.38E-16 | 1.79E-08    | 1.40E-12   | 1.42E-08 | 5.76E-01 | 2.53E-05 |
| phe.Fasting_ | rs138738950 | S8  | "PCDHGB2, | Pirs11524145  | S5  | CDK6      | 7.80E-07 | 1.00E+00    | 4.86E-04   | 7.90E-06 | 1.00E+00 | 6.70E-03 |
| phe.Fasting_ | rs138738950 | S8  | "PCDHGB2, | Pirs115752779 | S19 | NA        | 4.38E-16 | 1.79E-08    | 1.40E-12   | 1.42E-08 | 5.76E-01 | 2.53E-05 |
| phe.Fasting_ | rs138738950 | S8  | "PCDHGB2, | Pirs115787552 | S5  | KPNA3     | 2.97E-15 | 1.21E-07    | 8.14E-12   | 1.20E-13 | 4.88E-06 | 7.16E-10 |
| phe.Fasting_ | rs138738950 | S8  | "PCDHGB2, | Pirs115888477 | S8  | NA        | 2.03E-14 | 8.28E-07    | 5.02E-11   | 2.24E-14 | 9.14E-07 | 1.76E-10 |
| phe.Fasting_ | rs138738950 | S8  | "PCDHGB2, | Pirs116011837 | S9  | BRD2      | 4.89E-11 | 2.00E-03    | 6.62E-08   | 5.22E-14 | 2.12E-06 | 3.61E-10 |
| phe.Fasting_ | rs138738950 | S8  | "PCDHGB2, | Pirs116079984 | S8  | KPNA3     | 2.97E-15 | 1.21E-07    | 8.14E-12   | 1.26E-13 | 5.11E-06 | 7.44E-10 |
| phe.Fasting_ | rs138738950 | S8  | "PCDHGB2, | Pirs116120727 | S9  | BRD2      | 4.89E-11 | 2.00E-03    | 6.62E-08   | 5.22E-14 | 2.12E-06 | 3.61E-10 |
| phe.Fasting_ | rs138738950 | S8  | "PCDHGB2, | Pirs116406581 | S2  | NA        | 1.81E-14 | 7.39E-07    | 4.52E-11   | 2.31E-07 | 1.00E+00 | 3.00E-04 |
| phe.Fasting_ | rs138738950 | S8  | "PCDHGB2, | Pirs116548615 | S8  | TMEM45B   | 1.73E-16 | 7.06E-09    | 6.15E-13   | 8.70E-12 | 3.54E-04 | 3.26E-08 |
| phe.Fasting_ | rs138738950 | S8  | "PCDHGB2, | Pirs116696844 | S3  | AP3M2     | 6.92E-15 | 2.83E-07    | 1.78E-11   | 3.81E-07 | 1.00E+00 | 4.70E-04 |
| phe.Fasting_ | rs138738950 | S8  | "PCDHGB2, | Pirs11989304  | S4  | TMEM64    | 2.37E-06 | 1           | 0.00129547 | 6.78E-11 | 2.76E-03 | 2.13E-07 |
| phe.Fasting_ | rs138738950 | S8  | "PCDHGB2, | Pirs140524622 | S7  | MRPL10    | 1.08E-16 | 4.41E-09    | 4.54E-13   | 7.32E-06 | 1.00E+00 | 6.29E-03 |
| phe.Fasting_ | rs138738950 | S8  | "PCDHGB2, | Pirs146815317 | S5  | KPNA3     | 2.97E-15 | 1.21E-07    | 8.14E-12   | 1.20E-13 | 4.88E-06 | 7.16E-10 |
| phe.Fasting_ | rs138738950 | S8  | "PCDHGB2, | Pirs150117838 | S8  | KPNA3     | 2.97E-15 | 1.21E-07    | 8.14E-12   | 1.11E-13 | 4.50E-06 | 6.84E-10 |
| phe.Fasting_ | rs138738950 | S8  | "PCDHGB2, | Pirs150916187 | S4  | HIST1H2BK | 1.38E-05 | 1           | 0.00605332 | 1.39E-14 | 5.66E-07 | 1.17E-10 |
| phe.Fasting_ | rs138738950 | S8  | "PCDHGB2, | Pirs16894241  | S4  | HIST1H2BK | 1.99E-11 | 0.000812315 | 2.96E-08   | 3.48E-14 | 1.42E-06 | 2.52E-10 |
| phe.Fasting_ | rs138738950 | S8  | "PCDHGB2, | Pirs2032062   | S8  | NA        | 1.22E-14 | 4.98E-07    | 3.09E-11   | 8.14E-06 | 1.00E+00 | 6.88E-03 |
| phe.Fasting_ | rs138738950 | S8  | "PCDHGB2, | Pirs2153597   | S8  | ZNF438    | 5.51E-11 | 0.00224928  | 7.42E-08   | 4.52E-09 | 1.84E-01 | 9.08E-06 |
| phe.Fasting_ | rs138738950 | S8  | "PCDHGB2, | Pirs2835656   | S7  | TTC3      | 3.01E-10 | 0.0122766   | 3.60E-07   | 8.75E-06 | 1.00E+00 | 7.31E-03 |
| phe.Fasting_ | rs138738950 | S8  | "PCDHGB2, | Pirs34801978  | S3  | HOXB2     | 1.23E-05 | 1           | 0.00545724 | 1.03E-08 | 4.19E-01 | 1.90E-05 |
| phe.Fasting_ | rs138738950 | S8  | "PCDHGB2, | Pirs352346    | S3  | GRPEL2    | 1.85E-11 | 0.000754995 | 2.78E-08   | 8.34E-06 | 1.00E+00 | 7.05E-03 |
| phe.Fasting_ | rs138738950 | S8  | "PCDHGB2, | Pirs3750898   | S8  | DCLRE1A   | 2.29E-05 | 1           | 0.0093502  | 8.71E-06 | 1.00E+00 | 7.29E-03 |
| phe.Fasting_ | rs138738950 | S8  | "PCDHGB2, | Pirs4732511   | S13 | POR       | 2.30E-15 | 9.39E-08    | 6.48E-12   | 9.71E-06 | 1.00E+00 | 7.97E-03 |
| phe.Fasting_ | rs138738950 | S8  | "PCDHGB2, | Pirs57503635  | S3  | NA        | 6.34E-16 | 2.59E-08    | 1.95E-12   | 3.21E-14 | 1.31E-06 | 2.36E-10 |
| phe.Fasting_ | rs138738950 | S8  | "PCDHGB2, | Pirs58905476  | S7  | TTC3      | 3.29E-10 | 0.0134302   | 3.90E-07   | 9.42E-06 | 1.00E+00 | 7.77E-03 |
| phe.Fasting_ | rs138738950 | S8  | "PCDHGB2, | Pirs60011869  | S16 | NA        | 1.04E-05 | 1           | 0.00472365 | 8.18E-10 | 3.33E-02 | 1.99E-06 |
| phe.Fasting_ | rs138738950 | S8  | "PCDHGB2, | Pirs6964407   | S7  | POR       | 7.55E-15 | 3.08E-07    | 1.94E-11   | 8.97E-06 | 1.00E+00 | 7.47E-03 |
| phe.Fasting_ | rs138738950 | S8  | "PCDHGB2, | Pirs7004597   | S8  | NA        | 4.51E-15 | 1.84E-07    | 1.18E-11   | 2.30E-07 | 1.00E+00 | 3.00E-04 |
| phe.Fasting_ | rs138738950 | S8  | "PCDHGB2, | Pirs7256517   | S7  | CYTH2     | 1.04E-15 | 4.24E-08    | 3.06E-12   | 4.87E-12 | 1.98E-04 | 1.93E-08 |

|                           |                       |     |             |          |            |             |          |          |          |
|---------------------------|-----------------------|-----|-------------|----------|------------|-------------|----------|----------|----------|
| phe.Fasting_rs138738950S8 | "PCDHGB2,Pirs73283603 | S7  | ZWINT       | 1.90E-06 | 1          | 0.0010688   | 2.02E-07 | 1.00E+00 | 2.68E-04 |
| phe.Fasting_rs138738950S8 | "PCDHGB2,Pirs73392640 | S8  | POLR3B      | 2.02E-10 | 0.00826001 | 2.49E-07    | 5.19E-11 | 2.11E-03 | 1.67E-07 |
| phe.Fasting_rs138738950S8 | "PCDHGB2,Pirs734069   | S19 | NA          | 2.06E-08 | 0.839421   | 1.81E-05    | 6.71E-10 | 2.73E-02 | 1.68E-06 |
| phe.Fasting_rs138738950S8 | "PCDHGB2,Pirs73619637 | S8  | NA          | 1.44E-15 | 5.89E-08   | 4.14E-12    | 2.06E-10 | 8.40E-03 | 5.82E-07 |
| phe.Fasting_rs138738950S8 | "PCDHGB2,Pirs74627895 | S8  | TMEM64      | 7.32E-07 | 1          | 4.60E-04    | 2.03E-08 | 8.27E-01 | 3.48E-05 |
| phe.Fasting_rs138738950S8 | "PCDHGB2,Pirs74914207 | S24 | NA          | 1.37E-10 | 0.00558626 | 1.73E-07    | 9.14E-11 | 3.72E-03 | 2.80E-07 |
| phe.Fasting_rs138738950S8 | "PCDHGB2,Pirs75350765 | S5  | RCL1        | 1.82E-16 | 7.42E-09   | 6.37E-13    | 3.68E-08 | 1.00E+00 | 5.84E-05 |
| phe.Fasting_rs138738950S8 | "PCDHGB2,Pirs75374128 | S5  | CNTLN       | 1.47E-16 | 6.01E-09   | 5.72E-13    | 1.11E-07 | 1.00E+00 | 1.56E-04 |
| phe.Fasting_rs138738950S8 | "PCDHGB2,Pirs75506779 | S5  | TMCO3       | 5.55E-07 | 1          | 0.000360863 | 1.11E-08 | 4.52E-01 | 2.03E-05 |
| phe.Fasting_rs138738950S8 | "PCDHGB2,Pirs75758702 | S24 | NA          | 7.02E-17 | 2.87E-09   | 3.16E-13    | 1.58E-10 | 6.42E-03 | 4.61E-07 |
| phe.Fasting_rs138738950S8 | "PCDHGB2,Pirs75864203 | S8  | CNTLN       | 1.47E-16 | 6.01E-09   | 5.72E-13    | 1.11E-07 | 1.00E+00 | 1.56E-04 |
| phe.Fasting_rs138738950S8 | "PCDHGB2,Pirs75949566 | S5  | TMEM64      | 2.76E-06 | 1          | 0.001473    | 8.46E-11 | 3.45E-03 | 2.62E-07 |
| phe.Fasting_rs138738950S8 | "PCDHGB2,Pirs76844308 | S8  | CNTLN       | 7.68E-17 | 3.14E-09   | 3.41E-13    | 1.08E-07 | 1.00E+00 | 1.51E-04 |
| phe.Fasting_rs138738950S8 | "PCDHGB2,Pirs7763107  | S8  | FARS2       | 5.78E-16 | 2.36E-08   | 1.79E-12    | 9.26E-12 | 3.77E-04 | 3.45E-08 |
| phe.Fasting_rs138738950S8 | "PCDHGB2,Pirs77798597 | S7  | KPNA3       | 2.97E-15 | 1.21E-07   | 8.14E-12    | 1.11E-13 | 4.50E-06 | 6.84E-10 |
| phe.Fasting_rs138738950S8 | "PCDHGB2,Pirs77845645 | S21 | NA          | 1.53E-06 | 1          | 0.000888475 | 4.21E-11 | 1.71E-03 | 1.38E-07 |
| phe.Fasting_rs138738950S8 | "PCDHGB2,Pirs78353402 | S8  | AP3M2       | 4.51E-15 | 1.84E-07   | 1.18E-11    | 3.81E-07 | 1.00E+00 | 4.70E-04 |
| phe.Fasting_rs138738950S8 | "PCDHGB2,Pirs78516788 | S8  | SLC38A1     | 2.75E-11 | 0.00112269 | 3.94E-08    | 2.46E-10 | 1.00E-02 | 6.80E-07 |
| phe.Fasting_rs138738950S8 | "PCDHGB2,Pirs78697063 | S5  | MSI2        | 8.23E-19 | 3.36E-11   | 2.70E-14    | 6.81E-10 | 2.77E-02 | 1.70E-06 |
| phe.Fasting_rs138738950S8 | "PCDHGB2,Pirs78722272 | S5  | CNTLN       | 1.47E-16 | 6.01E-09   | 5.72E-13    | 1.16E-07 | 1.00E+00 | 1.61E-04 |
| phe.Fasting_rs138738950S8 | "PCDHGB2,Pirs78736524 | S5  | KPNA3       | 2.97E-15 | 1.21E-07   | 8.14E-12    | 1.20E-13 | 4.88E-06 | 7.16E-10 |
| phe.Fasting_rs138738950S8 | "PCDHGB2,Pirs78990344 | S2  | LOC10050631 | 2.37E-06 | 1          | 0.00129547  | 6.78E-11 | 2.76E-03 | 2.13E-07 |
| phe.Fasting_rs138738950S8 | "PCDHGB2,Pirs79781495 | S8  | KPNA3       | 2.97E-15 | 1.21E-07   | 8.14E-12    | 1.11E-13 | 4.50E-06 | 6.84E-10 |
| phe.Fasting_rs138738950S8 | "PCDHGB2,Pirs79886603 | S15 | NA          | 8.71E-08 | 1          | 6.74E-05    | 4.66E-07 | 1.00E+00 | 5.59E-04 |
| phe.Fasting_rs138738950S8 | "PCDHGB2,Pirs80200953 | S8  | PPP2R5D     | 8.49E-17 | 3.47E-09   | 3.69E-13    | 3.65E-09 | 1.49E-01 | 7.55E-06 |
| phe.Fasting_rs138738950S8 | "PCDHGB2,Pirs80332465 | S5  | KPNA3       | 3.13E-15 | 1.28E-07   | 8.51E-12    | 1.19E-13 | 4.84E-06 | 7.11E-10 |
| phe.Fasting_rs138738950S8 | "PCDHGB2,Pirs80334773 | S5  | KPNA3       | 3.13E-15 | 1.28E-07   | 8.51E-12    | 1.19E-13 | 4.84E-06 | 7.11E-10 |
| phe.Fasting_rs139070959S8 | RPN2 rs2285645        | S7  | MTMR3       | 5.59E-09 | 0.228305   | 5.44E-06    | 3.99E-07 | 1.00E+00 | 4.87E-04 |
| phe.Fasting_rs139070959S8 | RPN2 rs9620939        | S7  | MTMR3       | 5.93E-09 | 0.242162   | 5.75E-06    | 3.79E-08 | 1.00E+00 | 5.96E-05 |
| phe.Fasting_rs139070959S8 | RPN2 rs9625903        | S7  | MTMR3       | 6.98E-09 | 0.284998   | 6.70E-06    | 1.75E-08 | 7.11E-01 | 3.04E-05 |
| phe.Fasting_rs139297927S8 | DIAPH1 rs111576333    | S5  | TMEM64      | 2.37E-06 | 1          | 0.00129547  | 5.87E-14 | 2.39E-06 | 3.99E-10 |
| phe.Fasting_rs139297927S8 | DIAPH1 rs112089881    | S8  | ZFAND4      | 2.04E-17 | 8.32E-10   | 1.43E-13    | 1.09E-09 | 4.45E-02 | 2.58E-06 |
| phe.Fasting_rs139297927S8 | DIAPH1 rs112091318    | S5  | TMEM64      | 7.32E-07 | 1          | 0.000459899 | 3.91E-08 | 1.00E+00 | 6.13E-05 |
| phe.Fasting_rs139297927S8 | DIAPH1 rs114334325    | S7  | AP3M2       | 4.51E-15 | 1.84E-07   | 1.18E-11    | 3.87E-07 | 1.00E+00 | 4.75E-04 |
| phe.Fasting_rs139297927S8 | DIAPH1 rs114394395    | S7  | AP3M2       | 4.81E-15 | 1.97E-07   | 1.25E-11    | 3.87E-07 | 1.00E+00 | 4.75E-04 |
| phe.Fasting_rs139297927S8 | DIAPH1 rs114565620    | S8  | RCL1        | 1.82E-16 | 7.42E-09   | 6.37E-13    | 3.70E-08 | 1.00E+00 | 5.84E-05 |
| phe.Fasting_rs139297927S8 | DIAPH1 rs115083290    | S19 | NA          | 4.38E-16 | 1.79E-08   | 1.40E-12    | 1.42E-08 | 5.77E-01 | 2.53E-05 |
| phe.Fasting_rs139297927S8 | DIAPH1 rs11524145     | S5  | CDK6        | 7.80E-07 | 1          | 4.86E-04    | 7.89E-06 | 1.00E+00 | 6.69E-03 |
| phe.Fasting_rs139297927S8 | DIAPH1 rs115752779    | S19 | NA          | 4.38E-16 | 1.79E-08   | 1.40E-12    | 1.42E-08 | 5.77E-01 | 2.53E-05 |
| phe.Fasting_rs139297927S8 | DIAPH1 rs115787552    | S5  | KPNA3       | 2.97E-15 | 1.21E-07   | 8.14E-12    | 1.18E-13 | 4.80E-06 | 7.06E-10 |

|                            |        |                |           |          |             |             |          |          |          |
|----------------------------|--------|----------------|-----------|----------|-------------|-------------|----------|----------|----------|
| phe.Fasting_rs139297927 S8 | DIAPH1 | rs115888477 S8 | NA        | 2.03E-14 | 8.28E-07    | 5.02E-11    | 2.21E-14 | 8.99E-07 | 1.73E-10 |
| phe.Fasting_rs139297927 S8 | DIAPH1 | rs116011837 S9 | BRD2      | 4.89E-11 | 0.00199774  | 6.62E-08    | 4.07E-14 | 1.66E-06 | 2.85E-10 |
| phe.Fasting_rs139297927 S8 | DIAPH1 | rs116079984 S8 | KPNA3     | 2.97E-15 | 1.21E-07    | 8.14E-12    | 1.24E-13 | 5.04E-06 | 7.34E-10 |
| phe.Fasting_rs139297927 S8 | DIAPH1 | rs116120727 S9 | BRD2      | 4.89E-11 | 0.00199774  | 6.62E-08    | 4.07E-14 | 1.66E-06 | 2.85E-10 |
| phe.Fasting_rs139297927 S8 | DIAPH1 | rs116406581 S2 | NA        | 1.81E-14 | 7.39E-07    | 4.52E-11    | 2.35E-07 | 1.00E+00 | 3.05E-04 |
| phe.Fasting_rs139297927 S8 | DIAPH1 | rs116548615 S8 | TMEM45B   | 1.73E-16 | 7.06E-09    | 6.15E-13    | 8.70E-12 | 3.54E-04 | 3.26E-08 |
| phe.Fasting_rs139297927 S8 | DIAPH1 | rs116696844 S3 | AP3M2     | 6.92E-15 | 2.83E-07    | 1.78E-11    | 3.87E-07 | 1.00E+00 | 4.75E-04 |
| phe.Fasting_rs139297927 S8 | DIAPH1 | rs11989304 S4  | TMEM64    | 2.37E-06 | 1           | 0.00129547  | 6.78E-11 | 2.76E-03 | 2.13E-07 |
| phe.Fasting_rs139297927 S8 | DIAPH1 | rs140524622 S7 | MRPL10    | 1.08E-16 | 4.41E-09    | 4.54E-13    | 7.35E-06 | 1.00E+00 | 6.31E-03 |
| phe.Fasting_rs139297927 S8 | DIAPH1 | rs146815317 S5 | KPNA3     | 2.97E-15 | 1.21E-07    | 8.14E-12    | 1.18E-13 | 4.80E-06 | 7.06E-10 |
| phe.Fasting_rs139297927 S8 | DIAPH1 | rs150117838 S8 | KPNA3     | 2.97E-15 | 1.21E-07    | 8.14E-12    | 1.09E-13 | 4.44E-06 | 6.79E-10 |
| phe.Fasting_rs139297927 S8 | DIAPH1 | rs150916187 S4 | HIST1H2BK | 1.38E-05 | 1           | 0.00605332  | 1.37E-14 | 5.59E-07 | 1.16E-10 |
| phe.Fasting_rs139297927 S8 | DIAPH1 | rs16894241 S4  | HIST1H2BK | 1.99E-11 | 0.000812315 | 2.96E-08    | 3.44E-14 | 1.40E-06 | 2.50E-10 |
| phe.Fasting_rs139297927 S8 | DIAPH1 | rs2032062 S8   | NA        | 1.22E-14 | 4.98E-07    | 3.09E-11    | 8.48E-06 | 1.00E+00 | 7.14E-03 |
| phe.Fasting_rs139297927 S8 | DIAPH1 | rs2153597 S8   | ZNF438    | 5.51E-11 | 0.00224928  | 7.42E-08    | 4.52E-09 | 1.84E-01 | 9.08E-06 |
| phe.Fasting_rs139297927 S8 | DIAPH1 | rs2835656 S7   | TTC3      | 3.01E-10 | 0.0122766   | 3.60E-07    | 9.12E-06 | 1.00E+00 | 7.57E-03 |
| phe.Fasting_rs139297927 S8 | DIAPH1 | rs34801978 S3  | HOXB2     | 1.23E-05 | 1           | 0.00545724  | 1.03E-08 | 4.19E-01 | 1.90E-05 |
| phe.Fasting_rs139297927 S8 | DIAPH1 | rs352346 S3    | GRPEL2    | 1.85E-11 | 0.000754995 | 2.78E-08    | 8.42E-06 | 1.00E+00 | 7.10E-03 |
| phe.Fasting_rs139297927 S8 | DIAPH1 | rs3750898 S8   | DCLRE1A   | 2.29E-05 | 1           | 0.0093502   | 8.76E-06 | 1.00E+00 | 7.32E-03 |
| phe.Fasting_rs139297927 S8 | DIAPH1 | rs4732511 S13  | POR       | 2.30E-15 | 9.39E-07    | 6.48E-12    | 9.65E-06 | 1.00E+00 | 7.93E-03 |
| phe.Fasting_rs139297927 S8 | DIAPH1 | rs57503635 S3  | NA        | 6.34E-16 | 2.59E-08    | 1.95E-12    | 3.17E-14 | 1.29E-06 | 2.34E-10 |
| phe.Fasting_rs139297927 S8 | DIAPH1 | rs58905476 S7  | TTC3      | 3.29E-10 | 0.0134302   | 3.90E-07    | 9.79E-06 | 1.00E+00 | 8.01E-03 |
| phe.Fasting_rs139297927 S8 | DIAPH1 | rs60011869 S16 | NA        | 1.04E-05 | 1           | 0.00472365  | 8.16E-10 | 3.32E-02 | 1.98E-06 |
| phe.Fasting_rs139297927 S8 | DIAPH1 | rs6964407 S7   | POR       | 7.55E-15 | 3.08E-07    | 1.94E-11    | 8.91E-06 | 1.00E+00 | 7.43E-03 |
| phe.Fasting_rs139297927 S8 | DIAPH1 | rs7004597 S8   | NA        | 4.51E-15 | 1.84E-07    | 1.18E-11    | 2.34E-07 | 1.00E+00 | 3.04E-04 |
| phe.Fasting_rs139297927 S8 | DIAPH1 | rs7256517 S7   | CYTH2     | 1.04E-15 | 4.24E-08    | 3.06E-12    | 4.82E-12 | 1.96E-04 | 1.91E-08 |
| phe.Fasting_rs139297927 S8 | DIAPH1 | rs73283603 S7  | ZWINT     | 1.90E-06 | 1           | 0.0010688   | 2.03E-07 | 1.00E+00 | 2.68E-04 |
| phe.Fasting_rs139297927 S8 | DIAPH1 | rs73392640 S8  | POLR3B    | 2.02E-10 | 0.00826001  | 2.49E-07    | 5.19E-11 | 2.11E-03 | 1.67E-07 |
| phe.Fasting_rs139297927 S8 | DIAPH1 | rs734069 S19   | NA        | 2.06E-08 | 0.839421    | 1.81E-05    | 6.71E-10 | 2.73E-02 | 1.68E-06 |
| phe.Fasting_rs139297927 S8 | DIAPH1 | rs73619637 S8  | NA        | 1.44E-15 | 5.89E-08    | 4.14E-12    | 2.05E-10 | 8.34E-03 | 5.78E-07 |
| phe.Fasting_rs139297927 S8 | DIAPH1 | rs74627895 S8  | TMEM64    | 7.32E-07 | 1           | 0.000459899 | 2.03E-08 | 8.28E-01 | 3.48E-05 |
| phe.Fasting_rs139297927 S8 | DIAPH1 | rs74914207 S24 | NA        | 1.37E-10 | 0.00558626  | 1.73E-07    | 9.12E-11 | 3.71E-03 | 2.80E-07 |
| phe.Fasting_rs139297927 S8 | DIAPH1 | rs75350765 S5  | RCL1      | 1.82E-16 | 7.42E-09    | 6.37E-13    | 3.70E-08 | 1.00E+00 | 5.84E-05 |
| phe.Fasting_rs139297927 S8 | DIAPH1 | rs75374128 S5  | CNTLN     | 1.47E-16 | 6.01E-09    | 5.72E-13    | 1.01E-07 | 1.00E+00 | 1.42E-04 |
| phe.Fasting_rs139297927 S8 | DIAPH1 | rs75506779 S5  | TMCO3     | 5.55E-07 | 1           | 0.000360863 | 1.10E-08 | 4.50E-01 | 2.03E-05 |
| phe.Fasting_rs139297927 S8 | DIAPH1 | rs75758702 S24 | NA        | 7.02E-17 | 2.87E-09    | 3.16E-13    | 1.57E-10 | 6.38E-03 | 4.59E-07 |
| phe.Fasting_rs139297927 S8 | DIAPH1 | rs75864203 S8  | CNTLN     | 1.47E-16 | 6.01E-09    | 5.72E-13    | 1.01E-07 | 1.00E+00 | 1.42E-04 |
| phe.Fasting_rs139297927 S8 | DIAPH1 | rs75949566 S5  | TMEM64    | 2.76E-06 | 1           | 0.001473    | 8.48E-11 | 3.45E-03 | 2.62E-07 |
| phe.Fasting_rs139297927 S8 | DIAPH1 | rs76844308 S8  | CNTLN     | 7.68E-17 | 3.14E-09    | 3.41E-13    | 9.52E-08 | 1.00E+00 | 1.35E-04 |
| phe.Fasting_rs139297927 S8 | DIAPH1 | rs7763107 S8   | FARS2     | 5.78E-16 | 2.36E-08    | 1.79E-12    | 9.23E-12 | 3.76E-04 | 3.44E-08 |

|                            |        |                 |             |          |             |             |          |          |          |
|----------------------------|--------|-----------------|-------------|----------|-------------|-------------|----------|----------|----------|
| phe.Fasting_rs139297927 S8 | DIAPH1 | rs77798597 S7   | KPNA3       | 2.97E-15 | 1.21E-07    | 8.14E-12    | 1.09E-13 | 4.44E-06 | 6.79E-10 |
| phe.Fasting_rs139297927 S8 | DIAPH1 | rs77845645 S21  | NA          | 1.53E-06 | 1.00E+00    | 8.88E-04    | 4.20E-11 | 1.71E-03 | 1.38E-07 |
| phe.Fasting_rs139297927 S8 | DIAPH1 | rs78353402 S8   | AP3M2       | 4.51E-15 | 1.84E-07    | 1.18E-11    | 3.87E-07 | 1.00E+00 | 4.75E-04 |
| phe.Fasting_rs139297927 S8 | DIAPH1 | rs78516788 S8   | SLC38A1     | 2.75E-11 | 1.12E-03    | 3.94E-08    | 2.44E-10 | 9.93E-03 | 6.74E-07 |
| phe.Fasting_rs139297927 S8 | DIAPH1 | rs78697063 S5   | MSI2        | 8.23E-19 | 3.36E-11    | 2.70E-14    | 6.84E-10 | 2.78E-02 | 1.70E-06 |
| phe.Fasting_rs139297927 S8 | DIAPH1 | rs78722272 S5   | CNTLN       | 1.47E-16 | 6.01E-09    | 5.72E-13    | 1.05E-07 | 1.00E+00 | 1.48E-04 |
| phe.Fasting_rs139297927 S8 | DIAPH1 | rs78736524 S5   | KPNA3       | 2.97E-15 | 1.21E-07    | 8.14E-12    | 1.18E-13 | 4.80E-06 | 7.06E-10 |
| phe.Fasting_rs139297927 S8 | DIAPH1 | rs78990344 S2   | LOC10050631 | 2.37E-06 | 1.00E+00    | 1.30E-03    | 6.78E-11 | 2.76E-03 | 2.13E-07 |
| phe.Fasting_rs139297927 S8 | DIAPH1 | rs79781495 S8   | KPNA3       | 2.97E-15 | 1.21E-07    | 8.14E-12    | 1.09E-13 | 4.44E-06 | 6.79E-10 |
| phe.Fasting_rs139297927 S8 | DIAPH1 | rs79886603 S15  | NA          | 8.71E-08 | 1.00E+00    | 6.74E-05    | 4.66E-07 | 1.00E+00 | 5.59E-04 |
| phe.Fasting_rs139297927 S8 | DIAPH1 | rs80200953 S8   | PPP2R5D     | 8.49E-17 | 3.47E-09    | 3.69E-13    | 3.65E-09 | 1.48E-01 | 7.55E-06 |
| phe.Fasting_rs139297927 S8 | DIAPH1 | rs80332465 S5   | KPNA3       | 3.13E-15 | 1.28E-07    | 8.51E-12    | 1.17E-13 | 4.77E-06 | 7.06E-10 |
| phe.Fasting_rs139297927 S8 | DIAPH1 | rs80334773 S5   | KPNA3       | 3.13E-15 | 1.28E-07    | 8.51E-12    | 1.17E-13 | 4.77E-06 | 7.06E-10 |
| phe.Fasting_rs139337303 S8 | DIAPH1 | rs111576333 S5  | TMEM64      | 2.37E-06 | 1           | 0.00129547  | 5.87E-14 | 2.39E-06 | 3.99E-10 |
| phe.Fasting_rs139337303 S8 | DIAPH1 | rs112089881 S8  | ZFAND4      | 2.04E-17 | 8.32E-10    | 1.43E-13    | 1.09E-09 | 4.45E-02 | 2.58E-06 |
| phe.Fasting_rs139337303 S8 | DIAPH1 | rs112091318 S5  | TMEM64      | 7.32E-07 | 1           | 0.000459899 | 3.91E-08 | 1.00E+00 | 6.13E-05 |
| phe.Fasting_rs139337303 S8 | DIAPH1 | rs114334325 S7  | AP3M2       | 4.51E-15 | 1.84E-07    | 1.18E-11    | 3.87E-07 | 1.00E+00 | 4.75E-04 |
| phe.Fasting_rs139337303 S8 | DIAPH1 | rs114394395 S7  | AP3M2       | 4.81E-15 | 1.97E-07    | 1.25E-11    | 3.87E-07 | 1.00E+00 | 4.75E-04 |
| phe.Fasting_rs139337303 S8 | DIAPH1 | rs114565620 S8  | RCL1        | 1.82E-16 | 7.42E-09    | 6.37E-13    | 3.70E-08 | 1.00E+00 | 5.84E-05 |
| phe.Fasting_rs139337303 S8 | DIAPH1 | rs115083290 S19 | NA          | 4.38E-16 | 1.79E-08    | 1.40E-12    | 1.42E-08 | 5.77E-01 | 2.53E-05 |
| phe.Fasting_rs139337303 S8 | DIAPH1 | rs11524145 S5   | CDK6        | 7.80E-07 | 1           | 0.000486356 | 7.89E-06 | 1.00E+00 | 6.69E-03 |
| phe.Fasting_rs139337303 S8 | DIAPH1 | rs115752779 S19 | NA          | 4.38E-16 | 1.79E-08    | 1.40E-12    | 1.42E-08 | 5.77E-01 | 2.53E-05 |
| phe.Fasting_rs139337303 S8 | DIAPH1 | rs115787552 S5  | KPNA3       | 2.97E-15 | 1.21E-07    | 8.14E-12    | 1.18E-13 | 4.80E-06 | 7.06E-10 |
| phe.Fasting_rs139337303 S8 | DIAPH1 | rs115888477 S8  | NA          | 2.03E-14 | 8.28E-07    | 5.02E-11    | 2.21E-14 | 8.99E-07 | 1.73E-10 |
| phe.Fasting_rs139337303 S8 | DIAPH1 | rs116011837 S9  | BRD2        | 4.89E-11 | 2.00E-03    | 6.62E-08    | 4.07E-14 | 1.66E-06 | 2.85E-10 |
| phe.Fasting_rs139337303 S8 | DIAPH1 | rs116079984 S8  | KPNA3       | 2.97E-15 | 1.21E-07    | 8.14E-12    | 1.24E-13 | 5.04E-06 | 7.34E-10 |
| phe.Fasting_rs139337303 S8 | DIAPH1 | rs116120727 S9  | BRD2        | 4.89E-11 | 2.00E-03    | 6.62E-08    | 4.07E-14 | 1.66E-06 | 2.85E-10 |
| phe.Fasting_rs139337303 S8 | DIAPH1 | rs116406581 S2  | NA          | 1.81E-14 | 7.39E-07    | 4.52E-11    | 2.35E-07 | 1.00E+00 | 3.05E-04 |
| phe.Fasting_rs139337303 S8 | DIAPH1 | rs116548615 S8  | TMEM45B     | 1.73E-16 | 7.06E-09    | 6.15E-13    | 8.70E-12 | 3.54E-04 | 3.26E-08 |
| phe.Fasting_rs139337303 S8 | DIAPH1 | rs116696844 S3  | AP3M2       | 6.92E-15 | 2.83E-07    | 1.78E-11    | 3.87E-07 | 1.00E+00 | 4.75E-04 |
| phe.Fasting_rs139337303 S8 | DIAPH1 | rs11989304 S4   | TMEM64      | 2.37E-06 | 1.00E+00    | 1.30E-03    | 6.78E-11 | 2.76E-03 | 2.13E-07 |
| phe.Fasting_rs139337303 S8 | DIAPH1 | rs140524622 S7  | MRPL10      | 1.08E-16 | 4.41E-09    | 4.54E-13    | 7.35E-06 | 1.00E+00 | 6.31E-03 |
| phe.Fasting_rs139337303 S8 | DIAPH1 | rs146815317 S5  | KPNA3       | 2.97E-15 | 1.21E-07    | 8.14E-12    | 1.18E-13 | 4.80E-06 | 7.06E-10 |
| phe.Fasting_rs139337303 S8 | DIAPH1 | rs150117838 S8  | KPNA3       | 2.97E-15 | 1.21E-07    | 8.14E-12    | 1.09E-13 | 4.44E-06 | 6.79E-10 |
| phe.Fasting_rs139337303 S8 | DIAPH1 | rs150916187 S4  | HIST1H2BK   | 1.38E-05 | 1           | 0.00605332  | 1.37E-14 | 5.59E-07 | 1.16E-10 |
| phe.Fasting_rs139337303 S8 | DIAPH1 | rs16894241 S4   | HIST1H2BK   | 1.99E-11 | 0.000812315 | 2.96E-08    | 3.44E-14 | 1.40E-06 | 2.50E-10 |
| phe.Fasting_rs139337303 S8 | DIAPH1 | rs2032062 S8    | NA          | 1.22E-14 | 4.98E-07    | 3.09E-11    | 8.48E-06 | 1.00E+00 | 7.14E-03 |
| phe.Fasting_rs139337303 S8 | DIAPH1 | rs2153597 S8    | ZNF438      | 5.51E-11 | 2.25E-03    | 7.42E-08    | 4.52E-09 | 1.84E-01 | 9.08E-06 |
| phe.Fasting_rs139337303 S8 | DIAPH1 | rs2835656 S7    | TTC3        | 3.01E-10 | 1.23E-02    | 3.60E-07    | 9.12E-06 | 1.00E+00 | 7.57E-03 |
| phe.Fasting_rs139337303 S8 | DIAPH1 | rs34801978 S3   | HOXB2       | 1.23E-05 | 1.00E+00    | 5.46E-03    | 1.03E-08 | 4.19E-01 | 1.90E-05 |

|                            |        |             |     |             |          |          |             |          |          |          |
|----------------------------|--------|-------------|-----|-------------|----------|----------|-------------|----------|----------|----------|
| phe.Fasting_rs139337303 S8 | DIAPH1 | rs352346    | S3  | GRPEL2      | 1.85E-11 | 7.55E-04 | 2.78E-08    | 8.42E-06 | 1.00E+00 | 7.10E-03 |
| phe.Fasting_rs139337303 S8 | DIAPH1 | rs3750898   | S8  | DCLRE1A     | 2.29E-05 | 1        | 9.35E-03    | 8.76E-06 | 1.00E+00 | 7.32E-03 |
| phe.Fasting_rs139337303 S8 | DIAPH1 | rs4732511   | S13 | POR         | 2.30E-15 | 9.39E-08 | 6.48E-12    | 9.65E-06 | 1.00E+00 | 7.93E-03 |
| phe.Fasting_rs139337303 S8 | DIAPH1 | rs57503635  | S3  | NA          | 6.34E-16 | 2.59E-08 | 1.95E-12    | 3.17E-14 | 1.29E-06 | 2.34E-10 |
| phe.Fasting_rs139337303 S8 | DIAPH1 | rs58905476  | S7  | TTC3        | 3.29E-10 | 1.34E-02 | 3.90E-07    | 9.79E-06 | 1.00E+00 | 8.01E-03 |
| phe.Fasting_rs139337303 S8 | DIAPH1 | rs60011869  | S16 | NA          | 1.04E-05 | 1        | 0.00472365  | 8.16E-10 | 3.32E-02 | 1.98E-06 |
| phe.Fasting_rs139337303 S8 | DIAPH1 | rs6964407   | S7  | POR         | 7.55E-15 | 3.08E-07 | 1.94E-11    | 8.91E-06 | 1.00E+00 | 7.43E-03 |
| phe.Fasting_rs139337303 S8 | DIAPH1 | rs7004597   | S8  | NA          | 4.51E-15 | 1.84E-07 | 1.18E-11    | 2.34E-07 | 1.00E+00 | 3.04E-04 |
| phe.Fasting_rs139337303 S8 | DIAPH1 | rs7256517   | S7  | CYTH2       | 1.04E-15 | 4.24E-08 | 3.06E-12    | 4.82E-12 | 1.96E-04 | 1.91E-08 |
| phe.Fasting_rs139337303 S8 | DIAPH1 | rs73283603  | S7  | ZWINT       | 1.90E-06 | 1.00E+00 | 1.07E-03    | 2.03E-07 | 1.00E+00 | 2.68E-04 |
| phe.Fasting_rs139337303 S8 | DIAPH1 | rs73392640  | S8  | POLR3B      | 2.02E-10 | 8.26E-03 | 2.49E-07    | 5.19E-11 | 2.11E-03 | 1.67E-07 |
| phe.Fasting_rs139337303 S8 | DIAPH1 | rs734069    | S19 | NA          | 2.06E-08 | 0.839421 | 1.81E-05    | 6.71E-10 | 2.73E-02 | 1.68E-06 |
| phe.Fasting_rs139337303 S8 | DIAPH1 | rs73619637  | S8  | NA          | 1.44E-15 | 5.89E-08 | 4.14E-12    | 2.05E-10 | 8.34E-03 | 5.78E-07 |
| phe.Fasting_rs139337303 S8 | DIAPH1 | rs74627895  | S8  | TMEM64      | 7.32E-07 | 1.00E+00 | 4.60E-04    | 2.03E-08 | 8.28E-01 | 3.48E-05 |
| phe.Fasting_rs139337303 S8 | DIAPH1 | rs74914207  | S24 | NA          | 1.37E-10 | 5.59E-03 | 1.73E-07    | 9.12E-11 | 3.71E-03 | 2.80E-07 |
| phe.Fasting_rs139337303 S8 | DIAPH1 | rs75350765  | S5  | RCL1        | 1.82E-16 | 7.42E-09 | 6.37E-13    | 3.70E-08 | 1.00E+00 | 5.84E-05 |
| phe.Fasting_rs139337303 S8 | DIAPH1 | rs75374128  | S5  | CNTLN       | 1.47E-16 | 6.01E-09 | 5.72E-13    | 1.01E-07 | 1.00E+00 | 1.42E-04 |
| phe.Fasting_rs139337303 S8 | DIAPH1 | rs75506779  | S5  | TMCO3       | 5.55E-07 | 1.00E+00 | 3.61E-04    | 1.10E-08 | 4.50E-01 | 2.03E-05 |
| phe.Fasting_rs139337303 S8 | DIAPH1 | rs75758702  | S24 | NA          | 7.02E-17 | 2.87E-09 | 3.16E-13    | 1.57E-10 | 6.38E-03 | 4.59E-07 |
| phe.Fasting_rs139337303 S8 | DIAPH1 | rs75864203  | S8  | CNTLN       | 1.47E-16 | 6.01E-09 | 5.72E-13    | 1.01E-07 | 1.00E+00 | 1.42E-04 |
| phe.Fasting_rs139337303 S8 | DIAPH1 | rs75949566  | S5  | TMEM64      | 2.76E-06 | 1.00E+00 | 1.47E-03    | 8.48E-11 | 3.45E-03 | 2.62E-07 |
| phe.Fasting_rs139337303 S8 | DIAPH1 | rs76844308  | S8  | CNTLN       | 7.68E-17 | 3.14E-09 | 3.41E-13    | 9.52E-08 | 1.00E+00 | 1.35E-04 |
| phe.Fasting_rs139337303 S8 | DIAPH1 | rs7763107   | S8  | FARS2       | 5.78E-16 | 2.36E-08 | 1.79E-12    | 9.23E-12 | 3.76E-04 | 3.44E-08 |
| phe.Fasting_rs139337303 S8 | DIAPH1 | rs77798597  | S7  | KPNA3       | 2.97E-15 | 1.21E-07 | 8.14E-12    | 1.09E-13 | 4.44E-06 | 6.79E-10 |
| phe.Fasting_rs139337303 S8 | DIAPH1 | rs77845645  | S21 | NA          | 1.53E-06 | 1        | 0.000888475 | 4.20E-11 | 1.71E-03 | 1.38E-07 |
| phe.Fasting_rs139337303 S8 | DIAPH1 | rs78353402  | S8  | AP3M2       | 4.51E-15 | 1.84E-07 | 1.18E-11    | 3.87E-07 | 1.00E+00 | 4.75E-04 |
| phe.Fasting_rs139337303 S8 | DIAPH1 | rs78516788  | S8  | SLC38A1     | 2.75E-11 | 1.12E-03 | 3.94E-08    | 2.44E-10 | 9.93E-03 | 6.74E-07 |
| phe.Fasting_rs139337303 S8 | DIAPH1 | rs78697063  | S5  | MSI2        | 8.23E-19 | 3.36E-11 | 2.70E-14    | 6.84E-10 | 2.78E-02 | 1.70E-06 |
| phe.Fasting_rs139337303 S8 | DIAPH1 | rs78722272  | S5  | CNTLN       | 1.47E-16 | 6.01E-09 | 5.72E-13    | 1.05E-07 | 1.00E+00 | 1.48E-04 |
| phe.Fasting_rs139337303 S8 | DIAPH1 | rs78736524  | S5  | KPNA3       | 2.97E-15 | 1.21E-07 | 8.14E-12    | 1.18E-13 | 4.80E-06 | 7.06E-10 |
| phe.Fasting_rs139337303 S8 | DIAPH1 | rs78990344  | S2  | LOC10050631 | 2.37E-06 | 1.00E+00 | 1.30E-03    | 6.78E-11 | 2.76E-03 | 2.13E-07 |
| phe.Fasting_rs139337303 S8 | DIAPH1 | rs79781495  | S8  | KPNA3       | 2.97E-15 | 1.21E-07 | 8.14E-12    | 1.09E-13 | 4.44E-06 | 6.79E-10 |
| phe.Fasting_rs139337303 S8 | DIAPH1 | rs79886603  | S15 | NA          | 8.71E-08 | 1.00E+00 | 6.74E-05    | 4.66E-07 | 1.00E+00 | 5.59E-04 |
| phe.Fasting_rs139337303 S8 | DIAPH1 | rs80200953  | S8  | PPP2R5D     | 8.49E-17 | 3.47E-09 | 3.69E-13    | 3.65E-09 | 1.48E-01 | 7.55E-06 |
| phe.Fasting_rs139337303 S8 | DIAPH1 | rs80332465  | S5  | KPNA3       | 3.13E-15 | 1.28E-07 | 8.51E-12    | 1.17E-13 | 4.77E-06 | 7.06E-10 |
| phe.Fasting_rs139337303 S8 | DIAPH1 | rs80334773  | S5  | KPNA3       | 3.13E-15 | 1.28E-07 | 8.51E-12    | 1.17E-13 | 4.77E-06 | 7.06E-10 |
| phe.Fasting_rs139403963 S8 | DIAPH1 | rs111576333 | S5  | TMEM64      | 5.56E-07 | 1.00E+00 | 3.61E-04    | 7.80E-15 | 3.17E-07 | 6.90E-11 |
| phe.Fasting_rs139403963 S8 | DIAPH1 | rs112089881 | S8  | ZFAND4      | 3.24E-18 | 1.32E-10 | 5.45E-14    | 1.95E-10 | 7.96E-03 | 5.56E-07 |
| phe.Fasting_rs139403963 S8 | DIAPH1 | rs112091318 | S5  | TMEM64      | 1.64E-07 | 1.00E+00 | 1.18E-04    | 9.13E-09 | 3.72E-01 | 1.72E-05 |
| phe.Fasting_rs139403963 S8 | DIAPH1 | rs114334325 | S7  | AP3M2       | 1.25E-15 | 5.12E-08 | 3.65E-12    | 8.81E-08 | 1.00E+00 | 1.26E-04 |



|                            |        |                 |           |          |          |          |          |          |          |
|----------------------------|--------|-----------------|-----------|----------|----------|----------|----------|----------|----------|
| phe.Fasting_rs139403963 S8 | DIAPH1 | rs114394395 S7  | AP3M2     | 1.33E-15 | 5.44E-08 | 3.85E-12 | 8.81E-08 | 1.00E+00 | 1.26E-04 |
| phe.Fasting_rs139403963 S8 | DIAPH1 | rs114565620 S8  | RCL1      | 2.03E-17 | 8.30E-10 | 1.43E-13 | 8.23E-09 | 3.35E-01 | 1.57E-05 |
| phe.Fasting_rs139403963 S8 | DIAPH1 | rs115083290 S19 | NA        | 8.17E-17 | 3.34E-09 | 3.58E-13 | 2.77E-09 | 1.13E-01 | 5.90E-06 |
| phe.Fasting_rs139403963 S8 | DIAPH1 | rs115752779 S19 | NA        | 8.17E-17 | 3.34E-09 | 3.58E-13 | 2.77E-09 | 1.13E-01 | 5.90E-06 |
| phe.Fasting_rs139403963 S8 | DIAPH1 | rs115787552 S5  | KPNA3     | 5.05E-16 | 2.06E-08 | 1.59E-12 | 2.34E-14 | 9.53E-07 | 1.79E-10 |
| phe.Fasting_rs139403963 S8 | DIAPH1 | rs115888477 S8  | NA        | 3.68E-15 | 1.50E-07 | 9.90E-12 | 4.11E-15 | 1.67E-07 | 3.84E-11 |
| phe.Fasting_rs139403963 S8 | DIAPH1 | rs116011837 S9  | BRD2      | 9.60E-12 | 3.92E-04 | 1.53E-08 | 9.05E-15 | 3.68E-07 | 7.90E-11 |
| phe.Fasting_rs139403963 S8 | DIAPH1 | rs116079984 S8  | KPNA3     | 5.05E-16 | 2.06E-08 | 1.59E-12 | 2.56E-14 | 1.04E-06 | 1.94E-10 |
| phe.Fasting_rs139403963 S8 | DIAPH1 | rs116120727 S9  | BRD2      | 9.60E-12 | 3.92E-04 | 1.53E-08 | 9.05E-15 | 3.68E-07 | 7.90E-11 |
| phe.Fasting_rs139403963 S8 | DIAPH1 | rs116406581 S2  | NA        | 5.24E-15 | 2.14E-07 | 1.36E-11 | 5.32E-08 | 1.00E+00 | 8.11E-05 |
| phe.Fasting_rs139403963 S8 | DIAPH1 | rs116548615 S8  | TMEM45B   | 2.95E-17 | 1.21E-09 | 1.69E-13 | 1.76E-12 | 7.17E-05 | 7.72E-09 |
| phe.Fasting_rs139403963 S8 | DIAPH1 | rs116696844 S3  | AP3M2     | 1.90E-15 | 7.75E-08 | 5.41E-12 | 8.81E-08 | 1.00E+00 | 1.26E-04 |
| phe.Fasting_rs139403963 S8 | DIAPH1 | rs11989304 S4   | TMEM64    | 5.56E-07 | 1.00E+00 | 3.61E-04 | 1.11E-11 | 4.53E-04 | 4.10E-08 |
| phe.Fasting_rs139403963 S8 | DIAPH1 | rs140524622 S7  | MRPL10    | 1.81E-17 | 7.37E-10 | 1.32E-13 | 2.83E-06 | 1.00E+00 | 2.79E-03 |
| phe.Fasting_rs139403963 S8 | DIAPH1 | rs146815317 S5  | KPNA3     | 5.05E-16 | 2.06E-08 | 1.59E-12 | 2.34E-14 | 9.53E-07 | 1.79E-10 |
| phe.Fasting_rs139403963 S8 | DIAPH1 | rs150117838 S8  | KPNA3     | 5.05E-16 | 2.06E-08 | 1.59E-12 | 2.16E-14 | 8.80E-07 | 1.71E-10 |
| phe.Fasting_rs139403963 S8 | DIAPH1 | rs150916187 S4  | HIST1H2BK | 4.14E-06 | 1.00E+00 | 2.11E-03 | 2.61E-15 | 1.06E-07 | 2.55E-11 |
| phe.Fasting_rs139403963 S8 | DIAPH1 | rs16894241 S4   | HIST1H2BK | 3.73E-12 | 1.52E-04 | 6.73E-09 | 6.62E-15 | 2.69E-07 | 5.94E-11 |
| phe.Fasting_rs139403963 S8 | DIAPH1 | rs34801978 S3   | HOXB2     | 2.19E-06 | 1.00E+00 | 1.21E-03 | 1.65E-09 | 6.71E-02 | 3.72E-06 |
| phe.Fasting_rs139403963 S8 | DIAPH1 | rs4732511 S13   | POR       | 9.61E-15 | 3.93E-07 | 2.45E-11 | 2.36E-06 | 1.00E+00 | 2.39E-03 |
| phe.Fasting_rs139403963 S8 | DIAPH1 | rs57503635 S3   | NA        | 1.28E-16 | 5.23E-09 | 5.19E-13 | 6.61E-15 | 2.69E-07 | 5.94E-11 |
| phe.Fasting_rs139403963 S8 | DIAPH1 | rs60011869 S16  | NA        | 2.13E-06 | 1.00E+00 | 1.18E-03 | 1.78E-07 | 1.00E+00 | 2.39E-04 |
| phe.Fasting_rs139403963 S8 | DIAPH1 | rs6964407 S7    | POR       | 3.32E-14 | 1.36E-06 | 8.04E-11 | 2.16E-06 | 1.00E+00 | 2.22E-03 |
| phe.Fasting_rs139403963 S8 | DIAPH1 | rs7004597 S8    | NA        | 1.25E-15 | 5.12E-08 | 3.65E-12 | 5.12E-08 | 1.00E+00 | 7.84E-05 |
| phe.Fasting_rs139403963 S8 | DIAPH1 | rs7256517 S7    | CYTH2     | 1.59E-16 | 6.48E-09 | 6.03E-13 | 9.69E-13 | 3.95E-05 | 4.59E-09 |
| phe.Fasting_rs139403963 S8 | DIAPH1 | rs73283603 S7   | ZWINT     | 4.49E-07 | 1.00E+00 | 2.97E-04 | 4.53E-08 | 1.00E+00 | 7.02E-05 |
| phe.Fasting_rs139403963 S8 | DIAPH1 | rs73392640 S8   | POLR3B    | 4.58E-11 | 1.87E-03 | 6.24E-08 | 6.82E-12 | 2.78E-04 | 2.62E-08 |
| phe.Fasting_rs139403963 S8 | DIAPH1 | rs73619637 S8   | NA        | 2.00E-16 | 8.15E-09 | 6.95E-13 | 6.35E-08 | 1.00E+00 | 9.54E-05 |
| phe.Fasting_rs139403963 S8 | DIAPH1 | rs74627895 S8   | TMEM64    | 1.64E-07 | 1.00E+00 | 1.18E-04 | 4.42E-09 | 1.80E-01 | 8.98E-06 |
| phe.Fasting_rs139403963 S8 | DIAPH1 | rs74914207 S24  | NA        | 2.89E-11 | 1.18E-03 | 4.13E-08 | 1.56E-11 | 6.34E-04 | 5.60E-08 |
| phe.Fasting_rs139403963 S8 | DIAPH1 | rs75350765 S5   | RCL1      | 2.03E-17 | 8.30E-10 | 1.43E-13 | 8.23E-09 | 3.35E-01 | 1.57E-05 |
| phe.Fasting_rs139403963 S8 | DIAPH1 | rs75374128 S5   | CNTLN     | 5.25E-06 | 1.00E+00 | 2.60E-03 | 1.83E-08 | 7.47E-01 | 3.18E-05 |
| phe.Fasting_rs139403963 S8 | DIAPH1 | rs75506779 S5   | TMCO3     | 1.04E-07 | 1.00E+00 | 7.88E-05 | 2.32E-09 | 9.43E-02 | 5.04E-06 |
| phe.Fasting_rs139403963 S8 | DIAPH1 | rs75758702 S24  | NA        | 1.04E-17 | 4.25E-10 | 9.89E-14 | 2.85E-11 | 1.16E-03 | 9.77E-08 |
| phe.Fasting_rs139403963 S8 | DIAPH1 | rs75864203 S8   | CNTLN     | 5.25E-06 | 1.00E+00 | 2.60E-03 | 1.83E-08 | 7.47E-01 | 3.18E-05 |
| phe.Fasting_rs139403963 S8 | DIAPH1 | rs75949566 S5   | TMEM64    | 6.52E-07 | 1.00E+00 | 4.16E-04 | 1.49E-11 | 6.08E-04 | 5.38E-08 |
| phe.Fasting_rs139403963 S8 | DIAPH1 | rs76844308 S8   | CNTLN     | 2.67E-06 | 1.00E+00 | 1.44E-03 | 1.80E-08 | 7.34E-01 | 3.14E-05 |
| phe.Fasting_rs139403963 S8 | DIAPH1 | rs7763107 S8    | FARS2     | 9.44E-17 | 3.86E-09 | 4.06E-13 | 1.60E-12 | 6.52E-05 | 7.13E-09 |
| phe.Fasting_rs139403963 S8 | DIAPH1 | rs77798597 S7   | KPNA3     | 5.05E-16 | 2.06E-08 | 1.59E-12 | 2.16E-14 | 8.80E-07 | 1.71E-10 |
| phe.Fasting_rs139403963 S8 | DIAPH1 | rs77845645 S21  | NA        | 3.35E-07 | 1.00E+00 | 2.29E-04 | 1.04E-11 | 4.24E-04 | 3.85E-08 |

|              |             |     |            |              |     |            |          |          |          |          |          |          |
|--------------|-------------|-----|------------|--------------|-----|------------|----------|----------|----------|----------|----------|----------|
| phe.Fasting_ | rs139403963 | S8  | DIAPH1     | rs78353402   | S8  | AP3M2      | 1.25E-15 | 5.12E-08 | 3.65E-12 | 8.81E-08 | 1.00E+00 | 1.26E-04 |
| phe.Fasting_ | rs139403963 | S8  | DIAPH1     | rs78516788   | S8  | SLC38A1    | 1.24E-06 | 1.00E+00 | 7.38E-04 | 2.76E-09 | 1.12E-01 | 5.89E-06 |
| phe.Fasting_ | rs139403963 | S8  | DIAPH1     | rs78697063   | S5  | MSI2       | 7.77E-20 | 3.17E-12 | 2.23E-14 | 1.45E-10 | 5.92E-03 | 4.35E-07 |
| phe.Fasting_ | rs139403963 | S8  | DIAPH1     | rs78703708   | S7  | FAF2       | 7.40E-12 | 3.02E-04 | 1.27E-08 | 7.08E-06 | 1.00E+00 | 6.12E-03 |
| phe.Fasting_ | rs139403963 | S8  | DIAPH1     | rs78722272   | S5  | CNTLN      | 5.25E-06 | 1.00E+00 | 2.60E-03 | 1.89E-08 | 7.67E-01 | 3.26E-05 |
| phe.Fasting_ | rs139403963 | S8  | DIAPH1     | rs78736524   | S5  | KPNA3      | 5.05E-16 | 2.06E-08 | 1.59E-12 | 2.34E-14 | 9.53E-07 | 1.79E-10 |
| phe.Fasting_ | rs139403963 | S8  | DIAPH1     | rs78990344   | S2  | LOC1005063 | 5.56E-07 | 1.00E+00 | 3.61E-04 | 1.11E-11 | 4.53E-04 | 4.10E-08 |
| phe.Fasting_ | rs139403963 | S8  | DIAPH1     | rs79781495   | S8  | KPNA3      | 5.05E-16 | 2.06E-08 | 1.59E-12 | 2.16E-14 | 8.80E-07 | 1.71E-10 |
| phe.Fasting_ | rs139403963 | S8  | DIAPH1     | rs80200953   | S8  | PPP2R5D    | 1.41E-17 | 5.76E-10 | 1.14E-13 | 8.37E-10 | 3.41E-02 | 2.03E-06 |
| phe.Fasting_ | rs139403963 | S8  | DIAPH1     | rs80332465   | S5  | KPNA3      | 5.36E-16 | 2.19E-08 | 1.67E-12 | 2.32E-14 | 9.45E-07 | 1.79E-10 |
| phe.Fasting_ | rs139403963 | S8  | DIAPH1     | rs80334773   | S5  | KPNA3      | 5.36E-16 | 2.19E-08 | 1.67E-12 | 2.32E-14 | 9.45E-07 | 1.79E-10 |
| phe.Fasting_ | rs139403963 | S8  | DIAPH1     | rs891061     | S7  | POP4       | 6.59E-07 | 1.00E+00 | 4.20E-04 | 1.19E-05 | 1.00E+00 | 9.35E-03 |
| phe.Fasting_ | rs139621309 | S18 | "LOC100505 | (rs111576333 | S5  | TMEM64     | 2.37E-06 | 1.00E+00 | 1.30E-03 | 5.87E-14 | 2.39E-06 | 3.99E-10 |
| phe.Fasting_ | rs139621309 | S18 | "LOC100505 | (rs112089881 | S8  | ZFAND4     | 2.04E-17 | 8.32E-10 | 1.43E-13 | 1.09E-09 | 4.45E-02 | 2.58E-06 |
| phe.Fasting_ | rs139621309 | S18 | "LOC100505 | (rs112091318 | S5  | TMEM64     | 7.32E-07 | 1.00E+00 | 4.60E-04 | 3.91E-08 | 1.00E+00 | 6.13E-05 |
| phe.Fasting_ | rs139621309 | S18 | "LOC100505 | (rs114334325 | S7  | AP3M2      | 4.51E-15 | 1.84E-07 | 1.18E-11 | 3.87E-07 | 1.00E+00 | 4.75E-04 |
| phe.Fasting_ | rs139621309 | S18 | "LOC100505 | (rs114394395 | S7  | AP3M2      | 4.81E-15 | 1.97E-07 | 1.25E-11 | 3.87E-07 | 1.00E+00 | 4.75E-04 |
| phe.Fasting_ | rs139621309 | S18 | "LOC100505 | (rs114565620 | S8  | RCL1       | 1.82E-16 | 7.42E-09 | 6.37E-13 | 3.70E-08 | 1.00E+00 | 5.84E-05 |
| phe.Fasting_ | rs139621309 | S18 | "LOC100505 | (rs115083290 | S19 | NA         | 4.38E-16 | 1.79E-08 | 1.40E-12 | 1.42E-08 | 5.77E-01 | 2.53E-05 |
| phe.Fasting_ | rs139621309 | S18 | "LOC100505 | (rs11524145  | S5  | CDK6       | 7.80E-07 | 1.00E+00 | 4.86E-04 | 7.89E-06 | 1.00E+00 | 6.69E-03 |
| phe.Fasting_ | rs139621309 | S18 | "LOC100505 | (rs115752779 | S19 | NA         | 4.38E-16 | 1.79E-08 | 1.40E-12 | 1.42E-08 | 5.77E-01 | 2.53E-05 |
| phe.Fasting_ | rs139621309 | S18 | "LOC100505 | (rs115787552 | S5  | KPNA3      | 2.97E-15 | 1.21E-07 | 8.14E-12 | 1.18E-13 | 4.80E-06 | 7.06E-10 |
| phe.Fasting_ | rs139621309 | S18 | "LOC100505 | (rs115888477 | S8  | NA         | 2.03E-14 | 8.28E-07 | 5.02E-11 | 2.21E-14 | 8.99E-07 | 1.73E-10 |
| phe.Fasting_ | rs139621309 | S18 | "LOC100505 | (rs116011837 | S9  | BRD2       | 4.89E-11 | 2.00E-03 | 6.62E-08 | 4.07E-14 | 1.66E-06 | 2.85E-10 |
| phe.Fasting_ | rs139621309 | S18 | "LOC100505 | (rs116079984 | S8  | KPNA3      | 2.97E-15 | 1.21E-07 | 8.14E-12 | 1.24E-13 | 5.04E-06 | 7.34E-10 |
| phe.Fasting_ | rs139621309 | S18 | "LOC100505 | (rs116120727 | S9  | BRD2       | 4.89E-11 | 2.00E-03 | 6.62E-08 | 4.07E-14 | 1.66E-06 | 2.85E-10 |
| phe.Fasting_ | rs139621309 | S18 | "LOC100505 | (rs116406581 | S2  | NA         | 1.81E-14 | 7.39E-07 | 4.52E-11 | 2.35E-07 | 1.00E+00 | 3.05E-04 |
| phe.Fasting_ | rs139621309 | S18 | "LOC100505 | (rs116548615 | S8  | TMEM45B    | 1.73E-16 | 7.06E-09 | 6.15E-13 | 8.70E-12 | 3.54E-04 | 3.26E-08 |
| phe.Fasting_ | rs139621309 | S18 | "LOC100505 | (rs116696844 | S3  | AP3M2      | 6.92E-15 | 2.83E-07 | 1.78E-11 | 3.87E-07 | 1.00E+00 | 4.75E-04 |
| phe.Fasting_ | rs139621309 | S18 | "LOC100505 | (rs11989304  | S4  | TMEM64     | 2.37E-06 | 1.00E+00 | 1.30E-03 | 6.78E-11 | 2.76E-03 | 2.13E-07 |
| phe.Fasting_ | rs139621309 | S18 | "LOC100505 | (rs140524622 | S7  | MRPL10     | 1.08E-16 | 4.41E-09 | 4.54E-13 | 7.35E-06 | 1.00E+00 | 6.31E-03 |
| phe.Fasting_ | rs139621309 | S18 | "LOC100505 | (rs146815317 | S5  | KPNA3      | 2.97E-15 | 1.21E-07 | 8.14E-12 | 1.18E-13 | 4.80E-06 | 7.06E-10 |
| phe.Fasting_ | rs139621309 | S18 | "LOC100505 | (rs150117838 | S8  | KPNA3      | 2.97E-15 | 1.21E-07 | 8.14E-12 | 1.09E-13 | 4.44E-06 | 6.79E-10 |
| phe.Fasting_ | rs139621309 | S18 | "LOC100505 | (rs150916187 | S4  | HIST1H2BK  | 1.38E-05 | 1.00E+00 | 6.05E-03 | 1.37E-14 | 5.59E-07 | 1.16E-10 |
| phe.Fasting_ | rs139621309 | S18 | "LOC100505 | (rs16894241  | S4  | HIST1H2BK  | 1.99E-11 | 8.12E-04 | 2.96E-08 | 3.44E-14 | 1.40E-06 | 2.50E-10 |
| phe.Fasting_ | rs139621309 | S18 | "LOC100505 | (rs2032062   | S8  | NA         | 1.22E-14 | 4.98E-07 | 3.09E-11 | 8.48E-06 | 1.00E+00 | 7.14E-03 |
| phe.Fasting_ | rs139621309 | S18 | "LOC100505 | (rs2153597   | S8  | ZNF438     | 5.51E-11 | 2.25E-03 | 7.42E-08 | 4.52E-09 | 1.84E-01 | 9.08E-06 |
| phe.Fasting_ | rs139621309 | S18 | "LOC100505 | (rs2835656   | S7  | TTC3       | 3.01E-10 | 1.23E-02 | 3.60E-07 | 9.12E-06 | 1.00E+00 | 7.57E-03 |
| phe.Fasting_ | rs139621309 | S18 | "LOC100505 | (rs34801978  | S3  | HOXB2      | 1.23E-05 | 1.00E+00 | 5.46E-03 | 1.03E-08 | 4.19E-01 | 1.90E-05 |
| phe.Fasting_ | rs139621309 | S18 | "LOC100505 | (rs352346    | S3  | GRPEL2     | 1.85E-11 | 7.55E-04 | 2.78E-08 | 8.42E-06 | 1.00E+00 | 7.10E-03 |

|              |             |     |                       |             |             |          |          |          |          |          |          |          |
|--------------|-------------|-----|-----------------------|-------------|-------------|----------|----------|----------|----------|----------|----------|----------|
| phe.Fasting_ | rs139621309 | S18 | "LOC100505(rs3750898  | S8          | DCLRE1A     | 2.29E-05 | 1.00E+00 | 9.35E-03 | 8.76E-06 | 1.00E+00 | 7.32E-03 |          |
| phe.Fasting_ | rs139621309 | S18 | "LOC100505(rs4732511  | S13         | POR         | 2.30E-15 | 9.39E-08 | 6.48E-12 | 9.65E-06 | 1.00E+00 | 7.93E-03 |          |
| phe.Fasting_ | rs139621309 | S18 | "LOC100505(rs57503635 | S3          | NA          | 6.34E-16 | 2.59E-08 | 1.95E-12 | 3.17E-14 | 1.29E-06 | 2.34E-10 |          |
| phe.Fasting_ | rs139621309 | S18 | "LOC100505(rs58905476 | S7          | TTC3        | 3.29E-10 | 1.34E-02 | 3.90E-07 | 9.79E-06 | 1.00E+00 | 8.01E-03 |          |
| phe.Fasting_ | rs139621309 | S18 | "LOC100505(rs60011869 | S16         | NA          | 1.04E-05 | 1.00E+00 | 4.72E-03 | 8.16E-10 | 3.32E-02 | 1.98E-06 |          |
| phe.Fasting_ | rs139621309 | S18 | "LOC100505(rs6964407  | S7          | POR         | 7.55E-15 | 3.08E-07 | 1.94E-11 | 8.91E-06 | 1.00E+00 | 7.43E-03 |          |
| phe.Fasting_ | rs139621309 | S18 | "LOC100505(rs7004597  | S8          | NA          | 4.51E-15 | 1.84E-07 | 1.18E-11 | 2.34E-07 | 1.00E+00 | 3.04E-04 |          |
| phe.Fasting_ | rs139621309 | S18 | "LOC100505(rs7256517  | S7          | CYTH2       | 1.04E-15 | 4.24E-08 | 3.06E-12 | 4.82E-12 | 1.96E-04 | 1.91E-08 |          |
| phe.Fasting_ | rs139621309 | S18 | "LOC100505(rs73283603 | S7          | ZWINT       | 1.90E-06 | 1.00E+00 | 1.07E-03 | 2.03E-07 | 1.00E+00 | 2.68E-04 |          |
| phe.Fasting_ | rs139621309 | S18 | "LOC100505(rs73392640 | S8          | POLR3B      | 2.02E-10 | 8.26E-03 | 2.49E-07 | 5.19E-11 | 2.11E-03 | 1.67E-07 |          |
| phe.Fasting_ | rs139621309 | S18 | "LOC100505(rs734069   | S19         | NA          | 2.06E-08 | 8.39E-01 | 1.81E-05 | 6.71E-10 | 2.73E-02 | 1.68E-06 |          |
| phe.Fasting_ | rs139621309 | S18 | "LOC100505(rs73619637 | S8          | NA          | 1.44E-15 | 5.89E-08 | 4.14E-12 | 2.05E-10 | 8.34E-03 | 5.78E-07 |          |
| phe.Fasting_ | rs139621309 | S18 | "LOC100505(rs74627895 | S8          | TMEM64      | 7.32E-07 | 1.00E+00 | 4.60E-04 | 2.03E-08 | 8.28E-01 | 3.48E-05 |          |
| phe.Fasting_ | rs139621309 | S18 | "LOC100505(rs74914207 | S24         | NA          | 1.37E-10 | 5.59E-03 | 1.73E-07 | 9.12E-11 | 3.71E-03 | 2.80E-07 |          |
| phe.Fasting_ | rs139621309 | S18 | "LOC100505(rs75350765 | S5          | RCL1        | 1.82E-16 | 7.42E-09 | 6.37E-13 | 3.70E-08 | 1.00E+00 | 5.84E-05 |          |
| phe.Fasting_ | rs139621309 | S18 | "LOC100505(rs75374128 | S5          | CNTLN       | 1.47E-16 | 6.01E-09 | 5.72E-13 | 1.01E-07 | 1.00E+00 | 1.42E-04 |          |
| phe.Fasting_ | rs139621309 | S18 | "LOC100505(rs75506779 | S5          | TMCO3       | 5.55E-07 | 1.00E+00 | 3.61E-04 | 1.10E-08 | 4.50E-01 | 2.03E-05 |          |
| phe.Fasting_ | rs139621309 | S18 | "LOC100505(rs75758702 | S24         | NA          | 7.02E-17 | 2.87E-09 | 3.16E-13 | 1.57E-10 | 6.38E-03 | 4.59E-07 |          |
| phe.Fasting_ | rs139621309 | S18 | "LOC100505(rs75864203 | S8          | CNTLN       | 1.47E-16 | 6.01E-09 | 5.72E-13 | 1.01E-07 | 1.00E+00 | 1.42E-04 |          |
| phe.Fasting_ | rs139621309 | S18 | "LOC100505(rs75949566 | S5          | TMEM64      | 2.76E-06 | 1.00E+00 | 1.47E-03 | 8.48E-11 | 3.45E-03 | 2.62E-07 |          |
| phe.Fasting_ | rs139621309 | S18 | "LOC100505(rs76844308 | S8          | CNTLN       | 7.68E-17 | 3.14E-09 | 3.41E-13 | 9.52E-08 | 1.00E+00 | 1.35E-04 |          |
| phe.Fasting_ | rs139621309 | S18 | "LOC100505(rs7763107  | S8          | FARS2       | 5.78E-16 | 2.36E-08 | 1.79E-12 | 9.23E-12 | 3.76E-04 | 3.44E-08 |          |
| phe.Fasting_ | rs139621309 | S18 | "LOC100505(rs77798597 | S7          | KPNA3       | 2.97E-15 | 1.21E-07 | 8.14E-12 | 1.09E-13 | 4.44E-06 | 6.79E-10 |          |
| phe.Fasting_ | rs139621309 | S18 | "LOC100505(rs77845645 | S21         | NA          | 1.53E-06 | 1.00E+00 | 8.88E-04 | 4.20E-11 | 1.71E-03 | 1.38E-07 |          |
| phe.Fasting_ | rs139621309 | S18 | "LOC100505(rs78353402 | S8          | AP3M2       | 4.51E-15 | 1.84E-07 | 1.18E-11 | 3.87E-07 | 1.00E+00 | 4.75E-04 |          |
| phe.Fasting_ | rs139621309 | S18 | "LOC100505(rs78516788 | S8          | SLC38A1     | 2.75E-11 | 1.12E-03 | 3.94E-08 | 2.44E-10 | 9.93E-03 | 6.74E-07 |          |
| phe.Fasting_ | rs139621309 | S18 | "LOC100505(rs78697063 | S5          | MSI2        | 8.23E-19 | 3.36E-11 | 2.70E-14 | 6.84E-10 | 2.78E-02 | 1.70E-06 |          |
| phe.Fasting_ | rs139621309 | S18 | "LOC100505(rs78722272 | S5          | CNTLN       | 1.47E-16 | 6.01E-09 | 5.72E-13 | 1.05E-07 | 1.00E+00 | 1.48E-04 |          |
| phe.Fasting_ | rs139621309 | S18 | "LOC100505(rs78736524 | S5          | KPNA3       | 2.97E-15 | 1.21E-07 | 8.14E-12 | 1.18E-13 | 4.80E-06 | 7.06E-10 |          |
| phe.Fasting_ | rs139621309 | S18 | "LOC100505(rs78990344 | S2          | LOC1005063! | 2.37E-06 | 1.00E+00 | 1.30E-03 | 6.78E-11 | 2.76E-03 | 2.13E-07 |          |
| phe.Fasting_ | rs139621309 | S18 | "LOC100505(rs79781495 | S8          | KPNA3       | 2.97E-15 | 1.21E-07 | 8.14E-12 | 1.09E-13 | 4.44E-06 | 6.79E-10 |          |
| phe.Fasting_ | rs139621309 | S18 | "LOC100505(rs79886603 | S15         | NA          | 8.71E-08 | 1.00E+00 | 6.74E-05 | 4.66E-07 | 1.00E+00 | 5.59E-04 |          |
| phe.Fasting_ | rs139621309 | S18 | "LOC100505(rs80200953 | S8          | PPP2R5D     | 8.49E-17 | 3.47E-09 | 3.69E-13 | 3.65E-09 | 1.48E-01 | 7.55E-06 |          |
| phe.Fasting_ | rs139621309 | S18 | "LOC100505(rs80332465 | S5          | KPNA3       | 3.13E-15 | 1.28E-07 | 8.51E-12 | 1.17E-13 | 4.77E-06 | 7.06E-10 |          |
| phe.Fasting_ | rs139621309 | S18 | "LOC100505(rs80334773 | S5          | KPNA3       | 3.13E-15 | 1.28E-07 | 8.51E-12 | 1.17E-13 | 4.77E-06 | 7.06E-10 |          |
| phe.Fasting_ | rs139797194 | S8  | MYO1B                 | rs112027720 | S7          | DIAPH1   | 1.63E-07 | 1.00E+00 | 1.18E-04 | 4.25E-07 | 1.00E+00 | 5.16E-04 |
| phe.Fasting_ | rs139797194 | S8  | MYO1B                 | rs113219478 | S7          | DIAPH1   | 1.63E-07 | 1.00E+00 | 1.18E-04 | 4.25E-07 | 1.00E+00 | 5.16E-04 |
| phe.Fasting_ | rs139797194 | S8  | MYO1B                 | rs113357907 | S24         | ISL1     | 1.90E-17 | 7.77E-10 | 1.37E-13 | 4.66E-16 | 1.90E-08 | 1.16E-11 |
| phe.Fasting_ | rs139797194 | S8  | MYO1B                 | rs114565620 | S8          | RCL1     | 1.94E-05 | 1.00E+00 | 8.13E-03 | 1.01E-15 | 4.10E-08 | 1.18E-11 |
| phe.Fasting_ | rs139797194 | S8  | MYO1B                 | rs11524145  | S5          | CDK6     | 1.26E-05 | 1.00E+00 | 5.56E-03 | 8.56E-09 | 3.48E-01 | 1.62E-05 |

|                           |       |                |               |          |          |            |          |          |          |
|---------------------------|-------|----------------|---------------|----------|----------|------------|----------|----------|----------|
| phe.Fasting_rs139797194S8 | MYO1B | rs116011837S9  | BRD2          | 3.98E-06 | 1        | 2.03E-03   | 4.82E-07 | 1.00E+00 | 5.77E-04 |
| phe.Fasting_rs139797194S8 | MYO1B | rs116120727S9  | BRD2          | 3.98E-06 | 1.00E+00 | 2.03E-03   | 4.82E-07 | 1.00E+00 | 5.77E-04 |
| phe.Fasting_rs139797194S8 | MYO1B | rs116279995S20 | "PCDHGA4,PI   | 2.94E-08 | 1        | 2.53E-05   | 2.26E-07 | 1.00E+00 | 2.96E-04 |
| phe.Fasting_rs139797194S8 | MYO1B | rs13400525 S8  | MFF           | 5.32E-06 | 1        | 0.00262468 | 3.62E-06 | 1.00E+00 | 3.45E-03 |
| phe.Fasting_rs139797194S8 | MYO1B | rs138090701S5  | HDAC3         | 2.36E-08 | 9.63E-01 | 2.06E-05   | 4.79E-07 | 1.00E+00 | 5.74E-04 |
| phe.Fasting_rs139797194S8 | MYO1B | rs138136869S7  | DIAPH1        | 4.27E-08 | 1.00E+00 | 3.55E-05   | 1.24E-07 | 1.00E+00 | 1.72E-04 |
| phe.Fasting_rs139797194S8 | MYO1B | rs138457103S10 | DIAPH1        | 1.07E-07 | 1.00E+00 | 8.13E-05   | 4.60E-07 | 1.00E+00 | 5.54E-04 |
| phe.Fasting_rs139797194S8 | MYO1B | rs138487229S11 | DIAPH1        | 1.63E-07 | 1.00E+00 | 1.18E-04   | 4.25E-07 | 1.00E+00 | 5.16E-04 |
| phe.Fasting_rs139797194S8 | MYO1B | rs138738950S8  | "PCDHGB2,PI   | 1.63E-07 | 1.00E+00 | 1.18E-04   | 4.24E-07 | 1.00E+00 | 5.15E-04 |
| phe.Fasting_rs139797194S8 | MYO1B | rs139297927S8  | DIAPH1        | 1.63E-07 | 1.00E+00 | 1.18E-04   | 4.25E-07 | 1.00E+00 | 5.16E-04 |
| phe.Fasting_rs139797194S8 | MYO1B | rs139337303S8  | DIAPH1        | 1.63E-07 | 1.00E+00 | 1.18E-04   | 4.25E-07 | 1.00E+00 | 5.16E-04 |
| phe.Fasting_rs139797194S8 | MYO1B | rs139403963S8  | DIAPH1        | 4.27E-08 | 1.00E+00 | 3.55E-05   | 1.24E-07 | 1.00E+00 | 1.72E-04 |
| phe.Fasting_rs139797194S8 | MYO1B | rs139621309S18 | "LOC100505056 | 1.63E-07 | 1.00E+00 | 1.18E-04   | 4.25E-07 | 1.00E+00 | 5.16E-04 |
| phe.Fasting_rs139797194S8 | MYO1B | rs139828110S8  | DIAPH1        | 4.27E-08 | 1.00E+00 | 3.55E-05   | 1.24E-07 | 1.00E+00 | 1.72E-04 |
| phe.Fasting_rs139797194S8 | MYO1B | rs140070363S8  | DIAPH1        | 1.63E-07 | 1.00E+00 | 1.18E-04   | 4.25E-07 | 1.00E+00 | 5.16E-04 |
| phe.Fasting_rs139797194S8 | MYO1B | rs140644750S13 | DIAPH1        | 1.63E-07 | 1.00E+00 | 1.18E-04   | 4.25E-07 | 1.00E+00 | 5.16E-04 |
| phe.Fasting_rs139797194S8 | MYO1B | rs141022544S8  | DIAPH1        | 1.63E-07 | 1.00E+00 | 1.18E-04   | 4.25E-07 | 1.00E+00 | 5.16E-04 |
| phe.Fasting_rs139797194S8 | MYO1B | rs141525984S5  | DIAPH1        | 1.63E-07 | 1.00E+00 | 1.18E-04   | 4.25E-07 | 1.00E+00 | 5.16E-04 |
| phe.Fasting_rs139797194S8 | MYO1B | rs141692339S3  | "PCDHGA6,PI   | 3.41E-08 | 1.00E+00 | 2.89E-05   | 3.14E-07 | 1.00E+00 | 3.94E-04 |
| phe.Fasting_rs139797194S8 | MYO1B | rs141926074S8  | ATE1          | 9.84E-18 | 4.02E-10 | 9.58E-14   | 1.24E-11 | 5.07E-04 | 4.56E-08 |
| phe.Fasting_rs139797194S8 | MYO1B | rs142480565S8  | DIAPH1        | 1.63E-07 | 1.00E+00 | 1.18E-04   | 4.25E-07 | 1.00E+00 | 5.16E-04 |
| phe.Fasting_rs139797194S8 | MYO1B | rs142718558S7  | "DIAPH1,LOC   | 1.63E-07 | 1.00E+00 | 1.18E-04   | 4.25E-07 | 1.00E+00 | 5.16E-04 |
| phe.Fasting_rs139797194S8 | MYO1B | rs142789100S8  | DIAPH1        | 4.27E-08 | 1.00E+00 | 3.55E-05   | 1.24E-07 | 1.00E+00 | 1.72E-04 |
| phe.Fasting_rs139797194S8 | MYO1B | rs142812798S7  | DIAPH1        | 4.27E-08 | 1.00E+00 | 3.55E-05   | 1.24E-07 | 1.00E+00 | 1.72E-04 |
| phe.Fasting_rs139797194S8 | MYO1B | rs142888461S7  | NEK1          | 4.32E-16 | 1.77E-08 | 1.40E-12   | 1.54E-08 | 6.27E-01 | 2.73E-05 |
| phe.Fasting_rs139797194S8 | MYO1B | rs143377827S13 | "DIAPH1,LOC   | 3.71E-08 | 1.00E+00 | 3.12E-05   | 9.29E-08 | 1.00E+00 | 1.32E-04 |
| phe.Fasting_rs139797194S8 | MYO1B | rs143691978S11 | DIAPH1        | 4.27E-08 | 1.00E+00 | 3.55E-05   | 1.27E-07 | 1.00E+00 | 1.76E-04 |
| phe.Fasting_rs139797194S8 | MYO1B | rs144081334S11 | DIAPH1        | 4.27E-08 | 1.00E+00 | 3.55E-05   | 1.27E-07 | 1.00E+00 | 1.76E-04 |
| phe.Fasting_rs139797194S8 | MYO1B | rs144613910S8  | DIAPH1        | 1.63E-07 | 1.00E+00 | 1.18E-04   | 4.25E-07 | 1.00E+00 | 5.16E-04 |
| phe.Fasting_rs139797194S8 | MYO1B | rs145027704S11 | DIAPH1        | 4.27E-08 | 1.00E+00 | 3.55E-05   | 1.27E-07 | 1.00E+00 | 1.76E-04 |
| phe.Fasting_rs139797194S8 | MYO1B | rs146220673S7  | DIAPH1        | 1.63E-07 | 1.00E+00 | 1.18E-04   | 4.25E-07 | 1.00E+00 | 5.16E-04 |
| phe.Fasting_rs139797194S8 | MYO1B | rs146622060S13 | DIAPH1        | 4.27E-08 | 1.00E+00 | 3.55E-05   | 1.27E-07 | 1.00E+00 | 1.76E-04 |
| phe.Fasting_rs139797194S8 | MYO1B | rs146878162S7  | DIAPH1        | 1.63E-07 | 1.00E+00 | 1.18E-04   | 4.25E-07 | 1.00E+00 | 5.16E-04 |
| phe.Fasting_rs139797194S8 | MYO1B | rs1470889 S5   | ZC3H3         | 7.01E-06 | 1.00E+00 | 3.36E-03   | 4.80E-08 | 1.00E+00 | 7.40E-05 |
| phe.Fasting_rs139797194S8 | MYO1B | rs1470890 S5   | ZC3H3         | 7.01E-06 | 1.00E+00 | 3.36E-03   | 4.80E-08 | 1.00E+00 | 7.40E-05 |
| phe.Fasting_rs139797194S8 | MYO1B | rs147314451S8  | DIAPH1        | 1.63E-07 | 1.00E+00 | 1.18E-04   | 4.25E-07 | 1.00E+00 | 5.16E-04 |
| phe.Fasting_rs139797194S8 | MYO1B | rs147417996S7  | DIAPH1        | 4.27E-08 | 1.00E+00 | 3.55E-05   | 1.27E-07 | 1.00E+00 | 1.76E-04 |
| phe.Fasting_rs139797194S8 | MYO1B | rs147506725S21 | "PCDHGA1,PI   | 2.94E-08 | 1.00E+00 | 2.53E-05   | 2.26E-07 | 1.00E+00 | 2.96E-04 |
| phe.Fasting_rs139797194S8 | MYO1B | rs147646948S7  | "LOC100505056 | 1.63E-07 | 1.00E+00 | 1.18E-04   | 4.25E-07 | 1.00E+00 | 5.16E-04 |
| phe.Fasting_rs139797194S8 | MYO1B | rs147677041S8  | DIAPH1        | 4.27E-08 | 1.00E+00 | 3.55E-05   | 1.24E-07 | 1.00E+00 | 1.72E-04 |

|                           |       |                |             |          |          |          |          |          |          |
|---------------------------|-------|----------------|-------------|----------|----------|----------|----------|----------|----------|
| phe.Fasting_rs139797194S8 | MYO1B | rs148116628S7  | DIAPH1      | 1.63E-07 | 1.00E+00 | 1.18E-04 | 4.25E-07 | 1.00E+00 | 5.16E-04 |
| phe.Fasting_rs139797194S8 | MYO1B | rs148423011S7  | DIAPH1      | 1.63E-07 | 1.00E+00 | 1.18E-04 | 4.25E-07 | 1.00E+00 | 5.16E-04 |
| phe.Fasting_rs139797194S8 | MYO1B | rs149019627S8  | DIAPH1      | 4.27E-08 | 1.00E+00 | 3.55E-05 | 1.24E-07 | 1.00E+00 | 1.72E-04 |
| phe.Fasting_rs139797194S8 | MYO1B | rs149075406S8  | DIAPH1      | 1.63E-07 | 1.00E+00 | 1.18E-04 | 4.25E-07 | 1.00E+00 | 5.16E-04 |
| phe.Fasting_rs139797194S8 | MYO1B | rs149334783S8  | DIAPH1      | 1.63E-07 | 1.00E+00 | 1.18E-04 | 4.25E-07 | 1.00E+00 | 5.16E-04 |
| phe.Fasting_rs139797194S8 | MYO1B | rs149553852S21 | "PCDHGA10,  | 2.94E-08 | 1.00E+00 | 2.53E-05 | 2.26E-07 | 1.00E+00 | 2.96E-04 |
| phe.Fasting_rs139797194S8 | MYO1B | rs149716949S5  | DIAPH1      | 1.76E-08 | 7.19E-01 | 1.57E-05 | 5.16E-08 | 1.00E+00 | 7.90E-05 |
| phe.Fasting_rs139797194S8 | MYO1B | rs149791570S5  | DIAPH1      | 4.27E-08 | 1.00E+00 | 3.55E-05 | 1.24E-07 | 1.00E+00 | 1.72E-04 |
| phe.Fasting_rs139797194S8 | MYO1B | rs150452206S13 | "DIAPH1,LOC | 1.63E-07 | 1.00E+00 | 1.18E-04 | 4.25E-07 | 1.00E+00 | 5.16E-04 |
| phe.Fasting_rs139797194S8 | MYO1B | rs150675915S7  | DIAPH1      | 1.63E-07 | 1.00E+00 | 1.18E-04 | 4.25E-07 | 1.00E+00 | 5.16E-04 |
| phe.Fasting_rs139797194S8 | MYO1B | rs150765570S7  | DIAPH1      | 1.63E-07 | 1.00E+00 | 1.18E-04 | 4.25E-07 | 1.00E+00 | 5.16E-04 |
| phe.Fasting_rs139797194S8 | MYO1B | rs150916187S4  | HIST1H2BK   | 1.55E-09 | 6.34E-02 | 1.65E-06 | 7.71E-07 | 1.00E+00 | 8.90E-04 |
| phe.Fasting_rs139797194S8 | MYO1B | rs150992994S11 | "PCDHGA5,Pl | 1.73E-07 | 1.00E+00 | 1.24E-04 | 4.09E-07 | 1.00E+00 | 4.98E-04 |
| phe.Fasting_rs139797194S8 | MYO1B | rs151204700S8  | DIAPH1      | 1.63E-07 | 1.00E+00 | 1.18E-04 | 4.25E-07 | 1.00E+00 | 5.16E-04 |
| phe.Fasting_rs139797194S8 | MYO1B | rs151330468S8  | DIAPH1      | 4.27E-08 | 1.00E+00 | 3.55E-05 | 1.27E-07 | 1.00E+00 | 1.76E-04 |
| phe.Fasting_rs139797194S8 | MYO1B | rs16894241 S4  | HIST1H2BK   | 3.09E-09 | 1.26E-01 | 3.14E-06 | 1.18E-06 | 1.00E+00 | 1.31E-03 |
| phe.Fasting_rs139797194S8 | MYO1B | rs180772028S8  | "DIAPH1,LOC | 1.63E-07 | 1.00E+00 | 1.18E-04 | 4.25E-07 | 1.00E+00 | 5.16E-04 |
| phe.Fasting_rs139797194S8 | MYO1B | rs181224861S7  | DIAPH1      | 1.63E-07 | 1.00E+00 | 1.18E-04 | 4.25E-07 | 1.00E+00 | 5.16E-04 |
| phe.Fasting_rs139797194S8 | MYO1B | rs181247960S21 | "PCDHGA9,Pl | 2.94E-08 | 1.00E+00 | 2.53E-05 | 2.26E-07 | 1.00E+00 | 2.96E-04 |
| phe.Fasting_rs139797194S8 | MYO1B | rs181824655S21 | "PCDHGB6,Pl | 2.94E-08 | 1.00E+00 | 2.53E-05 | 2.26E-07 | 1.00E+00 | 2.96E-04 |
| phe.Fasting_rs139797194S8 | MYO1B | rs182714699S8  | DIAPH1      | 1.63E-07 | 1.00E+00 | 1.18E-04 | 4.25E-07 | 1.00E+00 | 5.16E-04 |
| phe.Fasting_rs139797194S8 | MYO1B | rs182958142S8  | DIAPH1      | 2.37E-07 | 1.00E+00 | 1.66E-04 | 5.60E-08 | 1.00E+00 | 8.50E-05 |
| phe.Fasting_rs139797194S8 | MYO1B | rs182965141S8  | DIAPH1      | 4.74E-08 | 1.00E+00 | 3.91E-05 | 3.63E-08 | 1.00E+00 | 5.75E-05 |
| phe.Fasting_rs139797194S8 | MYO1B | rs183597049S7  | DIAPH1      | 1.63E-07 | 1.00E+00 | 1.18E-04 | 4.25E-07 | 1.00E+00 | 5.16E-04 |
| phe.Fasting_rs139797194S8 | MYO1B | rs183980988S2  | NA          | 1.63E-07 | 1.00E+00 | 1.18E-04 | 4.25E-07 | 1.00E+00 | 5.16E-04 |
| phe.Fasting_rs139797194S8 | MYO1B | rs184233232S7  | DIAPH1      | 1.63E-07 | 1.00E+00 | 1.18E-04 | 4.25E-07 | 1.00E+00 | 5.16E-04 |
| phe.Fasting_rs139797194S8 | MYO1B | rs184509477S13 | "PCDHGB4,Pl | 1.63E-07 | 1.00E+00 | 1.18E-04 | 4.25E-07 | 1.00E+00 | 5.16E-04 |
| phe.Fasting_rs139797194S8 | MYO1B | rs185069296S15 | "LOC1005056 | 1.63E-07 | 1.00E+00 | 1.18E-04 | 4.25E-07 | 1.00E+00 | 5.16E-04 |
| phe.Fasting_rs139797194S8 | MYO1B | rs185502834S8  | DIAPH1      | 4.27E-08 | 1.00E+00 | 3.55E-05 | 1.24E-07 | 1.00E+00 | 1.72E-04 |
| phe.Fasting_rs139797194S8 | MYO1B | rs185759881S7  | DIAPH1      | 1.63E-07 | 1.00E+00 | 1.18E-04 | 4.25E-07 | 1.00E+00 | 5.16E-04 |
| phe.Fasting_rs139797194S8 | MYO1B | rs186288044S21 | "PCDHGB4,Pl | 2.94E-08 | 1.00E+00 | 2.53E-05 | 2.26E-07 | 1.00E+00 | 2.96E-04 |
| phe.Fasting_rs139797194S8 | MYO1B | rs187000011S11 | DIAPH1      | 1.63E-07 | 1.00E+00 | 1.18E-04 | 4.25E-07 | 1.00E+00 | 5.16E-04 |
| phe.Fasting_rs139797194S8 | MYO1B | rs188981295S5  | "RPS27AP10, | 1.63E-07 | 1.00E+00 | 1.18E-04 | 4.25E-07 | 1.00E+00 | 5.16E-04 |
| phe.Fasting_rs139797194S8 | MYO1B | rs190559574S7  | DIAPH1      | 4.27E-08 | 1.00E+00 | 3.55E-05 | 1.24E-07 | 1.00E+00 | 1.72E-04 |
| phe.Fasting_rs139797194S8 | MYO1B | rs191544043S8  | DIAPH1      | 1.63E-07 | 1.00E+00 | 1.18E-04 | 4.25E-07 | 1.00E+00 | 5.16E-04 |
| phe.Fasting_rs139797194S8 | MYO1B | rs191766712S7  | DIAPH1      | 1.63E-07 | 1.00E+00 | 1.18E-04 | 4.25E-07 | 1.00E+00 | 5.16E-04 |
| phe.Fasting_rs139797194S8 | MYO1B | rs192690040S7  | DIAPH1      | 1.63E-07 | 1.00E+00 | 1.18E-04 | 4.25E-07 | 1.00E+00 | 5.16E-04 |
| phe.Fasting_rs139797194S8 | MYO1B | rs192765219S7  | DIAPH1      | 1.63E-07 | 1.00E+00 | 1.18E-04 | 4.25E-07 | 1.00E+00 | 5.16E-04 |
| phe.Fasting_rs139797194S8 | MYO1B | rs192770525S7  | DIAPH1      | 1.63E-07 | 1.00E+00 | 1.18E-04 | 4.25E-07 | 1.00E+00 | 5.16E-04 |
| phe.Fasting_rs139797194S8 | MYO1B | rs2153597 S8   | ZNF438      | 2.91E-12 | 1.19E-04 | 5.33E-09 | 5.04E-11 | 2.05E-03 | 1.63E-07 |

|                           |       |            |     |             |          |          |          |          |          |          |
|---------------------------|-------|------------|-----|-------------|----------|----------|----------|----------|----------|----------|
| phe.Fasting_rs139797194S8 | MYO1B | rs2924507  | S5  | ZC3H3       | 7.01E-06 | 1.00E+00 | 3.36E-03 | 4.80E-08 | 1.00E+00 | 7.40E-05 |
| phe.Fasting_rs139797194S8 | MYO1B | rs2924508  | S8  | ZC3H3       | 7.01E-06 | 1.00E+00 | 3.36E-03 | 6.55E-08 | 1.00E+00 | 9.79E-05 |
| phe.Fasting_rs139797194S8 | MYO1B | rs2924511  | S7  | ZC3H3       | 7.01E-06 | 1.00E+00 | 3.36E-03 | 6.20E-08 | 1.00E+00 | 9.33E-05 |
| phe.Fasting_rs139797194S8 | MYO1B | rs2924512  | S7  | ZC3H3       | 7.51E-06 | 1.00E+00 | 3.56E-03 | 7.36E-08 | 1.00E+00 | 1.08E-04 |
| phe.Fasting_rs139797194S8 | MYO1B | rs2956376  | S8  | ZC3H3       | 7.01E-06 | 1.00E+00 | 3.36E-03 | 4.34E-08 | 1.00E+00 | 6.75E-05 |
| phe.Fasting_rs139797194S8 | MYO1B | rs2980270  | S7  | ZC3H3       | 7.01E-06 | 1.00E+00 | 3.36E-03 | 4.34E-08 | 1.00E+00 | 6.75E-05 |
| phe.Fasting_rs139797194S8 | MYO1B | rs2980272  | S7  | ZC3H3       | 7.51E-06 | 1.00E+00 | 3.56E-03 | 7.84E-08 | 1.00E+00 | 1.14E-04 |
| phe.Fasting_rs139797194S8 | MYO1B | rs2980275  | S5  | ZC3H3       | 7.01E-06 | 1.00E+00 | 3.36E-03 | 4.80E-08 | 1.00E+00 | 7.40E-05 |
| phe.Fasting_rs139797194S8 | MYO1B | rs35990401 | S7  | DIAPH1      | 1.72E-07 | 1.00E+00 | 1.24E-04 | 1.52E-07 | 1.00E+00 | 2.06E-04 |
| phe.Fasting_rs139797194S8 | MYO1B | rs366767   | S5  | ZC3H3       | 1.11E-05 | 1.00E+00 | 5.03E-03 | 4.98E-06 | 1.00E+00 | 4.56E-03 |
| phe.Fasting_rs139797194S8 | MYO1B | rs55741453 | S8  | NEK1        | 4.78E-17 | 1.95E-09 | 2.39E-13 | 3.36E-08 | 1.00E+00 | 5.36E-05 |
| phe.Fasting_rs139797194S8 | MYO1B | rs55765964 | S8  | NEK1        | 5.04E-17 | 2.06E-09 | 2.48E-13 | 3.36E-08 | 1.00E+00 | 5.36E-05 |
| phe.Fasting_rs139797194S8 | MYO1B | rs55900860 | S7  | DIAPH1      | 4.27E-08 | 1.00E+00 | 3.55E-05 | 1.24E-07 | 1.00E+00 | 1.72E-04 |
| phe.Fasting_rs139797194S8 | MYO1B | rs57165556 | S8  | NEK1        | 4.78E-17 | 1.95E-09 | 2.39E-13 | 3.36E-08 | 1.00E+00 | 5.36E-05 |
| phe.Fasting_rs139797194S8 | MYO1B | rs57287019 | S5  | CLCN3       | 2.88E-13 | 1.18E-05 | 6.19E-10 | 1.90E-09 | 7.75E-02 | 4.23E-06 |
| phe.Fasting_rs139797194S8 | MYO1B | rs57503635 | S3  | NA          | 2.12E-16 | 8.64E-09 | 7.24E-13 | 1.87E-06 | 1.00E+00 | 1.95E-03 |
| phe.Fasting_rs139797194S8 | MYO1B | rs58286737 | S8  | NEK1        | 4.78E-17 | 1.95E-09 | 2.39E-13 | 1.10E-08 | 4.46E-01 | 2.01E-05 |
| phe.Fasting_rs139797194S8 | MYO1B | rs61267727 | S8  | NEK1        | 4.78E-17 | 1.95E-09 | 2.39E-13 | 1.10E-08 | 4.46E-01 | 2.01E-05 |
| phe.Fasting_rs139797194S8 | MYO1B | rs6553443  | S8  | NEK1        | 4.78E-17 | 1.95E-09 | 2.39E-13 | 3.36E-08 | 1.00E+00 | 5.36E-05 |
| phe.Fasting_rs139797194S8 | MYO1B | rs6822970  | S8  | NEK1        | 4.78E-17 | 1.95E-09 | 2.39E-13 | 3.36E-08 | 1.00E+00 | 5.36E-05 |
| phe.Fasting_rs139797194S8 | MYO1B | rs6829220  | S20 | NEK1        | 4.78E-17 | 1.95E-09 | 2.39E-13 | 1.10E-08 | 4.46E-01 | 2.01E-05 |
| phe.Fasting_rs139797194S8 | MYO1B | rs6881310  | S23 | ISL1        | 1.32E-16 | 5.39E-09 | 5.28E-13 | 1.65E-11 | 6.70E-04 | 5.90E-08 |
| phe.Fasting_rs139797194S8 | MYO1B | rs73619637 | S8  | NA          | 2.96E-16 | 1.21E-08 | 9.84E-13 | 2.25E-15 | 9.15E-08 | 2.25E-11 |
| phe.Fasting_rs139797194S8 | MYO1B | rs73864708 | S8  | NEK1        | 4.78E-17 | 1.95E-09 | 2.39E-13 | 3.36E-08 | 1.00E+00 | 5.36E-05 |
| phe.Fasting_rs139797194S8 | MYO1B | rs73864714 | S8  | NEK1        | 4.78E-17 | 1.95E-09 | 2.39E-13 | 3.36E-08 | 1.00E+00 | 5.36E-05 |
| phe.Fasting_rs139797194S8 | MYO1B | rs73864724 | S8  | NEK1        | 4.78E-17 | 1.95E-09 | 2.39E-13 | 3.57E-08 | 1.00E+00 | 5.68E-05 |
| phe.Fasting_rs139797194S8 | MYO1B | rs73864726 | S8  | NEK1        | 4.78E-17 | 1.95E-09 | 2.39E-13 | 5.18E-08 | 1.00E+00 | 7.93E-05 |
| phe.Fasting_rs139797194S8 | MYO1B | rs73864731 | S5  | NEK1        | 9.69E-17 | 3.96E-09 | 4.15E-13 | 5.18E-08 | 1.00E+00 | 7.93E-05 |
| phe.Fasting_rs139797194S8 | MYO1B | rs73864732 | S8  | NEK1        | 1.08E-16 | 4.40E-09 | 4.54E-13 | 4.96E-08 | 1.00E+00 | 7.63E-05 |
| phe.Fasting_rs139797194S8 | MYO1B | rs73864740 | S2  | NA          | 1.03E-16 | 4.19E-09 | 4.35E-13 | 4.96E-08 | 1.00E+00 | 7.63E-05 |
| phe.Fasting_rs139797194S8 | MYO1B | rs73864759 | S8  | CLCN3       | 2.79E-17 | 1.14E-09 | 1.64E-13 | 3.16E-08 | 1.00E+00 | 5.07E-05 |
| phe.Fasting_rs139797194S8 | MYO1B | rs74986829 | S8  | NEK1        | 4.78E-17 | 1.95E-09 | 2.39E-13 | 5.18E-08 | 1.00E+00 | 7.93E-05 |
| phe.Fasting_rs139797194S8 | MYO1B | rs75350765 | S5  | RCL1        | 1.94E-05 | 1.00E+00 | 8.13E-03 | 1.01E-15 | 4.10E-08 | 1.18E-11 |
| phe.Fasting_rs139797194S8 | MYO1B | rs75506779 | S5  | TMCO3       | 8.56E-12 | 3.49E-04 | 1.42E-08 | 1.14E-05 | 1.00E+00 | 9.06E-03 |
| phe.Fasting_rs139797194S8 | MYO1B | rs7657672  | S8  | CLCN3       | 3.08E-13 | 1.26E-05 | 6.60E-10 | 2.21E-09 | 9.02E-02 | 4.84E-06 |
| phe.Fasting_rs139797194S8 | MYO1B | rs76737663 | S1  | LOC654841   | 6.11E-06 | 1.00E+00 | 2.97E-03 | 1.14E-05 | 1.00E+00 | 9.07E-03 |
| phe.Fasting_rs139797194S8 | MYO1B | rs7675011  | S8  | NEK1        | 4.78E-17 | 1.95E-09 | 2.39E-13 | 5.18E-08 | 1.00E+00 | 7.93E-05 |
| phe.Fasting_rs139797194S8 | MYO1B | rs7690583  | S8  | NEK1        | 4.78E-17 | 1.95E-09 | 2.39E-13 | 3.57E-08 | 1.00E+00 | 5.68E-05 |
| phe.Fasting_rs139797194S8 | MYO1B | rs77444916 | S23 | LOC642366   | 4.27E-17 | 1.74E-09 | 2.23E-13 | 4.40E-16 | 1.79E-08 | 1.16E-11 |
| phe.Fasting_rs139797194S8 | MYO1B | rs79517926 | S15 | "DIAPH1,LOC | 5.94E-08 | 1.00E+00 | 4.78E-05 | 6.90E-08 | 1.00E+00 | 1.01E-04 |

|                           |        |                |           |          |          |          |          |          |          |
|---------------------------|--------|----------------|-----------|----------|----------|----------|----------|----------|----------|
| phe.Fasting_rs139797194S8 | MYO1B  | rs80157533 S8  | NEK1      | 4.78E-17 | 1.95E-09 | 2.39E-13 | 1.10E-08 | 4.46E-01 | 2.01E-05 |
| phe.Fasting_rs139797194S8 | MYO1B  | rs80258830 S24 | LOC642366 | 4.27E-17 | 1.74E-09 | 2.23E-13 | 4.40E-16 | 1.79E-08 | 1.16E-11 |
| phe.Fasting_rs139828110S8 | DIAPH1 | rs111576333S5  | TMEM64    | 5.56E-07 | 1.00E+00 | 3.61E-04 | 7.80E-15 | 3.17E-07 | 6.90E-11 |
| phe.Fasting_rs139828110S8 | DIAPH1 | rs112089881S8  | ZFAND4    | 3.24E-18 | 1.32E-10 | 5.45E-14 | 1.95E-10 | 7.96E-03 | 5.56E-07 |
| phe.Fasting_rs139828110S8 | DIAPH1 | rs112091318S5  | TMEM64    | 1.64E-07 | 1.00E+00 | 1.18E-04 | 9.13E-09 | 3.72E-01 | 1.72E-05 |
| phe.Fasting_rs139828110S8 | DIAPH1 | rs114334325S7  | AP3M2     | 1.25E-15 | 5.12E-08 | 3.65E-12 | 8.81E-08 | 1.00E+00 | 1.26E-04 |
| phe.Fasting_rs139828110S8 | DIAPH1 | rs114394395S7  | AP3M2     | 1.33E-15 | 5.44E-08 | 3.85E-12 | 8.81E-08 | 1.00E+00 | 1.26E-04 |
| phe.Fasting_rs139828110S8 | DIAPH1 | rs114565620S8  | RCL1      | 2.03E-17 | 8.30E-10 | 1.43E-13 | 8.23E-09 | 3.35E-01 | 1.57E-05 |
| phe.Fasting_rs139828110S8 | DIAPH1 | rs115083290S19 | NA        | 8.17E-17 | 3.34E-09 | 3.58E-13 | 2.77E-09 | 1.13E-01 | 5.90E-06 |
| phe.Fasting_rs139828110S8 | DIAPH1 | rs115752779S19 | NA        | 8.17E-17 | 3.34E-09 | 3.58E-13 | 2.77E-09 | 1.13E-01 | 5.90E-06 |
| phe.Fasting_rs139828110S8 | DIAPH1 | rs115787552S5  | KPNA3     | 5.05E-16 | 2.06E-08 | 1.59E-12 | 2.34E-14 | 9.53E-07 | 1.79E-10 |
| phe.Fasting_rs139828110S8 | DIAPH1 | rs115888477S8  | NA        | 3.68E-15 | 1.50E-07 | 9.90E-12 | 4.11E-15 | 1.67E-07 | 3.84E-11 |
| phe.Fasting_rs139828110S8 | DIAPH1 | rs116011837S9  | BRD2      | 9.60E-12 | 3.92E-04 | 1.53E-08 | 9.05E-15 | 3.68E-07 | 7.90E-11 |
| phe.Fasting_rs139828110S8 | DIAPH1 | rs116079984S8  | KPNA3     | 5.05E-16 | 2.06E-08 | 1.59E-12 | 2.56E-14 | 1.04E-06 | 1.94E-10 |
| phe.Fasting_rs139828110S8 | DIAPH1 | rs116120727S9  | BRD2      | 9.60E-12 | 3.92E-04 | 1.53E-08 | 9.05E-15 | 3.68E-07 | 7.90E-11 |
| phe.Fasting_rs139828110S8 | DIAPH1 | rs116406581S2  | NA        | 5.24E-15 | 2.14E-07 | 1.36E-11 | 5.32E-08 | 1.00E+00 | 8.11E-05 |
| phe.Fasting_rs139828110S8 | DIAPH1 | rs116548615S8  | TMEM45B   | 2.95E-17 | 1.21E-09 | 1.69E-13 | 1.76E-12 | 7.17E-05 | 7.72E-09 |
| phe.Fasting_rs139828110S8 | DIAPH1 | rs116696844S3  | AP3M2     | 1.90E-15 | 7.75E-08 | 5.41E-12 | 8.81E-08 | 1.00E+00 | 1.26E-04 |
| phe.Fasting_rs139828110S8 | DIAPH1 | rs11989304 S4  | TMEM64    | 5.56E-07 | 1.00E+00 | 3.61E-04 | 1.11E-11 | 4.53E-04 | 4.10E-08 |
| phe.Fasting_rs139828110S8 | DIAPH1 | rs140524622S7  | MRPL10    | 1.81E-17 | 7.37E-10 | 1.32E-13 | 2.83E-06 | 1.00E+00 | 2.79E-03 |
| phe.Fasting_rs139828110S8 | DIAPH1 | rs146815317S5  | KPNA3     | 5.05E-16 | 2.06E-08 | 1.59E-12 | 2.34E-14 | 9.53E-07 | 1.79E-10 |
| phe.Fasting_rs139828110S8 | DIAPH1 | rs150117838S8  | KPNA3     | 5.05E-16 | 2.06E-08 | 1.59E-12 | 2.16E-14 | 8.80E-07 | 1.71E-10 |
| phe.Fasting_rs139828110S8 | DIAPH1 | rs150916187S4  | HIST1H2BK | 4.14E-06 | 1.00E+00 | 2.11E-03 | 2.61E-15 | 1.06E-07 | 2.55E-11 |
| phe.Fasting_rs139828110S8 | DIAPH1 | rs16894241 S4  | HIST1H2BK | 3.73E-12 | 1.52E-04 | 6.73E-09 | 6.62E-15 | 2.69E-07 | 5.94E-11 |
| phe.Fasting_rs139828110S8 | DIAPH1 | rs34801978 S3  | HOXB2     | 2.19E-06 | 1.00E+00 | 1.21E-03 | 1.65E-09 | 6.71E-02 | 3.72E-06 |
| phe.Fasting_rs139828110S8 | DIAPH1 | rs4732511 S13  | POR       | 9.61E-15 | 3.93E-07 | 2.45E-11 | 2.36E-06 | 1.00E+00 | 2.39E-03 |
| phe.Fasting_rs139828110S8 | DIAPH1 | rs57503635 S3  | NA        | 1.28E-16 | 5.23E-09 | 5.19E-13 | 6.61E-15 | 2.69E-07 | 5.94E-11 |
| phe.Fasting_rs139828110S8 | DIAPH1 | rs60011869 S16 | NA        | 2.13E-06 | 1.00E+00 | 1.18E-03 | 1.78E-07 | 1.00E+00 | 2.39E-04 |
| phe.Fasting_rs139828110S8 | DIAPH1 | rs6964407 S7   | POR       | 3.32E-14 | 1.36E-06 | 8.04E-11 | 2.16E-06 | 1.00E+00 | 2.22E-03 |
| phe.Fasting_rs139828110S8 | DIAPH1 | rs7004597 S8   | NA        | 1.25E-15 | 5.12E-08 | 3.65E-12 | 5.12E-08 | 1.00E+00 | 7.84E-05 |
| phe.Fasting_rs139828110S8 | DIAPH1 | rs7256517 S7   | CYTH2     | 1.59E-16 | 6.48E-09 | 6.03E-13 | 9.69E-13 | 3.95E-05 | 4.59E-09 |
| phe.Fasting_rs139828110S8 | DIAPH1 | rs73283603 S7  | ZWINT     | 4.49E-07 | 1.00E+00 | 2.97E-04 | 4.53E-08 | 1.00E+00 | 7.02E-05 |
| phe.Fasting_rs139828110S8 | DIAPH1 | rs73392640 S8  | POLR3B    | 4.58E-11 | 1.87E-03 | 6.24E-08 | 6.82E-12 | 2.78E-04 | 2.62E-08 |
| phe.Fasting_rs139828110S8 | DIAPH1 | rs73619637 S8  | NA        | 2.00E-16 | 8.15E-09 | 6.95E-13 | 6.35E-08 | 1.00E+00 | 9.54E-05 |
| phe.Fasting_rs139828110S8 | DIAPH1 | rs74627895 S8  | TMEM64    | 1.64E-07 | 1.00E+00 | 1.18E-04 | 4.42E-09 | 1.80E-01 | 8.98E-06 |
| phe.Fasting_rs139828110S8 | DIAPH1 | rs74914207 S24 | NA        | 2.89E-11 | 1.18E-03 | 4.13E-08 | 1.56E-11 | 6.34E-04 | 5.60E-08 |
| phe.Fasting_rs139828110S8 | DIAPH1 | rs75350765 S5  | RCL1      | 2.03E-17 | 8.30E-10 | 1.43E-13 | 8.23E-09 | 3.35E-01 | 1.57E-05 |
| phe.Fasting_rs139828110S8 | DIAPH1 | rs75374128 S5  | CNTLN     | 5.25E-06 | 1.00E+00 | 2.60E-03 | 1.83E-08 | 7.47E-01 | 3.18E-05 |
| phe.Fasting_rs139828110S8 | DIAPH1 | rs75506779 S5  | TMCO3     | 1.04E-07 | 1.00E+00 | 7.88E-05 | 2.32E-09 | 9.43E-02 | 5.04E-06 |
| phe.Fasting_rs139828110S8 | DIAPH1 | rs75758702 S24 | NA        | 1.04E-17 | 4.25E-10 | 9.89E-14 | 2.85E-11 | 1.16E-03 | 9.77E-08 |

|                           |        |                |             |          |          |          |          |          |          |
|---------------------------|--------|----------------|-------------|----------|----------|----------|----------|----------|----------|
| phe.Fasting_rs139828110S8 | DIAPH1 | rs75864203 S8  | CNTLN       | 5.25E-06 | 1.00E+00 | 2.60E-03 | 1.83E-08 | 7.47E-01 | 3.18E-05 |
| phe.Fasting_rs139828110S8 | DIAPH1 | rs75949566 S5  | TMEM64      | 6.52E-07 | 1.00E+00 | 4.16E-04 | 1.49E-11 | 6.08E-04 | 5.38E-08 |
| phe.Fasting_rs139828110S8 | DIAPH1 | rs76844308 S8  | CNTLN       | 2.67E-06 | 1.00E+00 | 1.44E-03 | 1.80E-08 | 7.34E-01 | 3.14E-05 |
| phe.Fasting_rs139828110S8 | DIAPH1 | rs7763107 S8   | FARS2       | 9.44E-17 | 3.86E-09 | 4.06E-13 | 1.60E-12 | 6.52E-05 | 7.13E-09 |
| phe.Fasting_rs139828110S8 | DIAPH1 | rs77798597 S7  | KPNA3       | 5.05E-16 | 2.06E-08 | 1.59E-12 | 2.16E-14 | 8.80E-07 | 1.71E-10 |
| phe.Fasting_rs139828110S8 | DIAPH1 | rs77845645 S21 | NA          | 3.35E-07 | 1.00E+00 | 2.29E-04 | 1.04E-11 | 4.24E-04 | 3.85E-08 |
| phe.Fasting_rs139828110S8 | DIAPH1 | rs78353402 S8  | AP3M2       | 1.25E-15 | 5.12E-08 | 3.65E-12 | 8.81E-08 | 1.00E+00 | 1.26E-04 |
| phe.Fasting_rs139828110S8 | DIAPH1 | rs78516788 S8  | SLC38A1     | 1.24E-06 | 1.00E+00 | 7.38E-04 | 2.76E-09 | 1.12E-01 | 5.89E-06 |
| phe.Fasting_rs139828110S8 | DIAPH1 | rs78697063 S5  | MSI2        | 7.77E-20 | 3.17E-12 | 2.23E-14 | 1.45E-10 | 5.92E-03 | 4.35E-07 |
| phe.Fasting_rs139828110S8 | DIAPH1 | rs78703708 S7  | FAF2        | 7.40E-12 | 3.02E-04 | 1.27E-08 | 7.08E-06 | 1.00E+00 | 6.12E-03 |
| phe.Fasting_rs139828110S8 | DIAPH1 | rs78722272 S5  | CNTLN       | 5.25E-06 | 1.00E+00 | 2.60E-03 | 1.89E-08 | 7.67E-01 | 3.26E-05 |
| phe.Fasting_rs139828110S8 | DIAPH1 | rs78736524 S5  | KPNA3       | 5.05E-16 | 2.06E-08 | 1.59E-12 | 2.34E-14 | 9.53E-07 | 1.79E-10 |
| phe.Fasting_rs139828110S8 | DIAPH1 | rs78990344 S2  | LOC1005063! | 5.56E-07 | 1.00E+00 | 3.61E-04 | 1.11E-11 | 4.53E-04 | 4.10E-08 |
| phe.Fasting_rs139828110S8 | DIAPH1 | rs79781495 S8  | KPNA3       | 5.05E-16 | 2.06E-08 | 1.59E-12 | 2.16E-14 | 8.80E-07 | 1.71E-10 |
| phe.Fasting_rs139828110S8 | DIAPH1 | rs80200953 S8  | PPP2R5D     | 1.41E-17 | 5.76E-10 | 1.14E-13 | 8.37E-10 | 3.41E-02 | 2.03E-06 |
| phe.Fasting_rs139828110S8 | DIAPH1 | rs80332465 S5  | KPNA3       | 5.36E-16 | 2.19E-08 | 1.67E-12 | 2.32E-14 | 9.45E-07 | 1.79E-10 |
| phe.Fasting_rs139828110S8 | DIAPH1 | rs80334773 S5  | KPNA3       | 5.36E-16 | 2.19E-08 | 1.67E-12 | 2.32E-14 | 9.45E-07 | 1.79E-10 |
| phe.Fasting_rs139828110S8 | DIAPH1 | rs891061 S7    | POP4        | 6.59E-07 | 1.00E+00 | 4.20E-04 | 1.19E-05 | 1.00E+00 | 9.35E-03 |
| phe.Fasting_rs140070363S8 | DIAPH1 | rs111576333S5  | TMEM64      | 2.37E-06 | 1.00E+00 | 1.30E-03 | 5.87E-14 | 2.39E-06 | 3.99E-10 |
| phe.Fasting_rs140070363S8 | DIAPH1 | rs112089881S8  | ZFAND4      | 2.04E-17 | 8.32E-10 | 1.43E-13 | 1.09E-09 | 4.45E-02 | 2.58E-06 |
| phe.Fasting_rs140070363S8 | DIAPH1 | rs112091318S5  | TMEM64      | 7.32E-07 | 1.00E+00 | 4.60E-04 | 3.91E-08 | 1.00E+00 | 6.13E-05 |
| phe.Fasting_rs140070363S8 | DIAPH1 | rs114334325S7  | AP3M2       | 4.51E-15 | 1.84E-07 | 1.18E-11 | 3.87E-07 | 1.00E+00 | 4.75E-04 |
| phe.Fasting_rs140070363S8 | DIAPH1 | rs114394395S7  | AP3M2       | 4.81E-15 | 1.97E-07 | 1.25E-11 | 3.87E-07 | 1.00E+00 | 4.75E-04 |
| phe.Fasting_rs140070363S8 | DIAPH1 | rs114565620S8  | RCL1        | 1.82E-16 | 7.42E-09 | 6.37E-13 | 3.70E-08 | 1.00E+00 | 5.84E-05 |
| phe.Fasting_rs140070363S8 | DIAPH1 | rs115083290S19 | NA          | 4.38E-16 | 1.79E-08 | 1.40E-12 | 1.42E-08 | 5.77E-01 | 2.53E-05 |
| phe.Fasting_rs140070363S8 | DIAPH1 | rs11524145 S5  | CDK6        | 7.80E-07 | 1.00E+00 | 4.86E-04 | 7.89E-06 | 1.00E+00 | 6.69E-03 |
| phe.Fasting_rs140070363S8 | DIAPH1 | rs115752779S19 | NA          | 4.38E-16 | 1.79E-08 | 1.40E-12 | 1.42E-08 | 5.77E-01 | 2.53E-05 |
| phe.Fasting_rs140070363S8 | DIAPH1 | rs115787552S5  | KPNA3       | 2.97E-15 | 1.21E-07 | 8.14E-12 | 1.18E-13 | 4.80E-06 | 7.06E-10 |
| phe.Fasting_rs140070363S8 | DIAPH1 | rs115888477S8  | NA          | 2.03E-14 | 8.28E-07 | 5.02E-11 | 2.21E-14 | 8.99E-07 | 1.73E-10 |
| phe.Fasting_rs140070363S8 | DIAPH1 | rs116011837S9  | BRD2        | 4.89E-11 | 2.00E-03 | 6.62E-08 | 4.07E-14 | 1.66E-06 | 2.85E-10 |
| phe.Fasting_rs140070363S8 | DIAPH1 | rs116079984S8  | KPNA3       | 2.97E-15 | 1.21E-07 | 8.14E-12 | 1.24E-13 | 5.04E-06 | 7.34E-10 |
| phe.Fasting_rs140070363S8 | DIAPH1 | rs116120727S9  | BRD2        | 4.89E-11 | 2.00E-03 | 6.62E-08 | 4.07E-14 | 1.66E-06 | 2.85E-10 |
| phe.Fasting_rs140070363S8 | DIAPH1 | rs116406581S2  | NA          | 1.81E-14 | 7.39E-07 | 4.52E-11 | 2.35E-07 | 1.00E+00 | 3.05E-04 |
| phe.Fasting_rs140070363S8 | DIAPH1 | rs116548615S8  | TMEM45B     | 1.73E-16 | 7.06E-09 | 6.15E-13 | 8.70E-12 | 3.54E-04 | 3.26E-08 |
| phe.Fasting_rs140070363S8 | DIAPH1 | rs116696844S3  | AP3M2       | 6.92E-15 | 2.83E-07 | 1.78E-11 | 3.87E-07 | 1.00E+00 | 4.75E-04 |
| phe.Fasting_rs140070363S8 | DIAPH1 | rs11989304 S4  | TMEM64      | 2.37E-06 | 1.00E+00 | 1.30E-03 | 6.78E-11 | 2.76E-03 | 2.13E-07 |
| phe.Fasting_rs140070363S8 | DIAPH1 | rs140524622S7  | MRPL10      | 1.08E-16 | 4.41E-09 | 4.54E-13 | 7.35E-06 | 1.00E+00 | 6.31E-03 |
| phe.Fasting_rs140070363S8 | DIAPH1 | rs146815317S5  | KPNA3       | 2.97E-15 | 1.21E-07 | 8.14E-12 | 1.18E-13 | 4.80E-06 | 7.06E-10 |
| phe.Fasting_rs140070363S8 | DIAPH1 | rs150117838S8  | KPNA3       | 2.97E-15 | 1.21E-07 | 8.14E-12 | 1.09E-13 | 4.44E-06 | 6.79E-10 |
| phe.Fasting_rs140070363S8 | DIAPH1 | rs150916187S4  | HIST1H2BK   | 1.38E-05 | 1.00E+00 | 6.05E-03 | 1.37E-14 | 5.59E-07 | 1.16E-10 |



|                            |        |                |             |          |            |           |          |          |          |
|----------------------------|--------|----------------|-------------|----------|------------|-----------|----------|----------|----------|
| phe.Fasting_rs140070363 S8 | DIAPH1 | rs16894241 S4  | HIST1H2BK   | 1.99E-11 | 8.12E-04   | 2.96E-08  | 3.44E-14 | 1.40E-06 | 2.50E-10 |
| phe.Fasting_rs140070363 S8 | DIAPH1 | rs2032062 S8   | NA          | 1.22E-14 | 4.98E-07   | 3.09E-11  | 8.48E-06 | 1.00E+00 | 7.14E-03 |
| phe.Fasting_rs140070363 S8 | DIAPH1 | rs2153597 S8   | ZNF438      | 5.51E-11 | 2.25E-03   | 7.42E-08  | 4.52E-09 | 1.84E-01 | 9.08E-06 |
| phe.Fasting_rs140070363 S8 | DIAPH1 | rs2835656 S7   | TTC3        | 3.01E-10 | 1.23E-02   | 3.60E-07  | 9.12E-06 | 1.00E+00 | 7.57E-03 |
| phe.Fasting_rs140070363 S8 | DIAPH1 | rs34801978 S3  | HOXB2       | 1.23E-05 | 1.00E+00   | 5.46E-03  | 1.03E-08 | 4.19E-01 | 1.90E-05 |
| phe.Fasting_rs140070363 S8 | DIAPH1 | rs352346 S3    | GRPEL2      | 1.85E-11 | 7.55E-04   | 2.78E-08  | 8.42E-06 | 1.00E+00 | 7.10E-03 |
| phe.Fasting_rs140070363 S8 | DIAPH1 | rs3750898 S8   | DCLRE1A     | 2.29E-05 | 1.00E+00   | 9.35E-03  | 8.76E-06 | 1.00E+00 | 7.32E-03 |
| phe.Fasting_rs140070363 S8 | DIAPH1 | rs4732511 S13  | POR         | 2.30E-15 | 9.39E-08   | 6.48E-12  | 9.65E-06 | 1.00E+00 | 7.93E-03 |
| phe.Fasting_rs140070363 S8 | DIAPH1 | rs57503635 S3  | NA          | 6.34E-16 | 2.59E-08   | 1.95E-12  | 3.17E-14 | 1.29E-06 | 2.34E-10 |
| phe.Fasting_rs140070363 S8 | DIAPH1 | rs58905476 S7  | TTC3        | 3.29E-10 | 1.34E-02   | 3.90E-07  | 9.79E-06 | 1.00E+00 | 8.01E-03 |
| phe.Fasting_rs140070363 S8 | DIAPH1 | rs60011869 S16 | NA          | 1.04E-05 | 1.00E+00   | 4.72E-03  | 8.16E-10 | 3.32E-02 | 1.98E-06 |
| phe.Fasting_rs140070363 S8 | DIAPH1 | rs6964407 S7   | POR         | 7.55E-15 | 3.08E-07   | 1.94E-11  | 8.91E-06 | 1.00E+00 | 7.43E-03 |
| phe.Fasting_rs140070363 S8 | DIAPH1 | rs7004597 S8   | NA          | 4.51E-15 | 1.84E-07   | 1.18E-11  | 2.34E-07 | 1.00E+00 | 3.04E-04 |
| phe.Fasting_rs140070363 S8 | DIAPH1 | rs7256517 S7   | CYTH2       | 1.04E-15 | 4.24E-08   | 3.06E-12  | 4.82E-12 | 1.96E-04 | 1.91E-08 |
| phe.Fasting_rs140070363 S8 | DIAPH1 | rs73283603 S7  | ZWINT       | 1.90E-06 | 1          | 0.0010688 | 2.03E-07 | 1.00E+00 | 2.68E-04 |
| phe.Fasting_rs140070363 S8 | DIAPH1 | rs73392640 S8  | POLR3B      | 2.02E-10 | 0.00826001 | 2.49E-07  | 5.19E-11 | 2.11E-03 | 1.67E-07 |
| phe.Fasting_rs140070363 S8 | DIAPH1 | rs734069 S19   | NA          | 2.06E-08 | 0.839421   | 1.81E-05  | 6.71E-10 | 2.73E-02 | 1.68E-06 |
| phe.Fasting_rs140070363 S8 | DIAPH1 | rs73619637 S8  | NA          | 1.44E-15 | 5.89E-08   | 4.14E-12  | 2.05E-10 | 8.34E-03 | 5.78E-07 |
| phe.Fasting_rs140070363 S8 | DIAPH1 | rs74627895 S8  | TMEM64      | 7.32E-07 | 1          | 4.60E-04  | 2.03E-08 | 8.28E-01 | 3.48E-05 |
| phe.Fasting_rs140070363 S8 | DIAPH1 | rs74914207 S24 | NA          | 1.37E-10 | 0.00558626 | 1.73E-07  | 9.12E-11 | 3.71E-03 | 2.80E-07 |
| phe.Fasting_rs140070363 S8 | DIAPH1 | rs75350765 S5  | RCL1        | 1.82E-16 | 7.42E-09   | 6.37E-13  | 3.70E-08 | 1.00E+00 | 5.84E-05 |
| phe.Fasting_rs140070363 S8 | DIAPH1 | rs75374128 S5  | CNTLN       | 1.47E-16 | 6.01E-09   | 5.72E-13  | 1.01E-07 | 1.00E+00 | 1.42E-04 |
| phe.Fasting_rs140070363 S8 | DIAPH1 | rs75506779 S5  | TMCO3       | 5.55E-07 | 1.00E+00   | 3.61E-04  | 1.10E-08 | 4.50E-01 | 2.03E-05 |
| phe.Fasting_rs140070363 S8 | DIAPH1 | rs75758702 S24 | NA          | 7.02E-17 | 2.87E-09   | 3.16E-13  | 1.57E-10 | 6.38E-03 | 4.59E-07 |
| phe.Fasting_rs140070363 S8 | DIAPH1 | rs75864203 S8  | CNTLN       | 1.47E-16 | 6.01E-09   | 5.72E-13  | 1.01E-07 | 1.00E+00 | 1.42E-04 |
| phe.Fasting_rs140070363 S8 | DIAPH1 | rs75949566 S5  | TMEM64      | 2.76E-06 | 1.00E+00   | 1.47E-03  | 8.48E-11 | 3.45E-03 | 2.62E-07 |
| phe.Fasting_rs140070363 S8 | DIAPH1 | rs76844308 S8  | CNTLN       | 7.68E-17 | 3.14E-09   | 3.41E-13  | 9.52E-08 | 1.00E+00 | 1.35E-04 |
| phe.Fasting_rs140070363 S8 | DIAPH1 | rs7763107 S8   | FARS2       | 5.78E-16 | 2.36E-08   | 1.79E-12  | 9.23E-12 | 3.76E-04 | 3.44E-08 |
| phe.Fasting_rs140070363 S8 | DIAPH1 | rs77798597 S7  | KPNA3       | 2.97E-15 | 1.21E-07   | 8.14E-12  | 1.09E-13 | 4.44E-06 | 6.79E-10 |
| phe.Fasting_rs140070363 S8 | DIAPH1 | rs77845645 S21 | NA          | 1.53E-06 | 1.00E+00   | 8.88E-04  | 4.20E-11 | 1.71E-03 | 1.38E-07 |
| phe.Fasting_rs140070363 S8 | DIAPH1 | rs78353402 S8  | AP3M2       | 4.51E-15 | 1.84E-07   | 1.18E-11  | 3.87E-07 | 1.00E+00 | 4.75E-04 |
| phe.Fasting_rs140070363 S8 | DIAPH1 | rs78516788 S8  | SLC38A1     | 2.75E-11 | 1.12E-03   | 3.94E-08  | 2.44E-10 | 9.93E-03 | 6.74E-07 |
| phe.Fasting_rs140070363 S8 | DIAPH1 | rs78697063 S5  | MSI2        | 8.23E-19 | 3.36E-11   | 2.70E-14  | 6.84E-10 | 2.78E-02 | 1.70E-06 |
| phe.Fasting_rs140070363 S8 | DIAPH1 | rs78722272 S5  | CNTLN       | 1.47E-16 | 6.01E-09   | 5.72E-13  | 1.05E-07 | 1.00E+00 | 1.48E-04 |
| phe.Fasting_rs140070363 S8 | DIAPH1 | rs78736524 S5  | KPNA3       | 2.97E-15 | 1.21E-07   | 8.14E-12  | 1.18E-13 | 4.80E-06 | 7.06E-10 |
| phe.Fasting_rs140070363 S8 | DIAPH1 | rs78990344 S2  | LOC1005063! | 2.37E-06 | 1.00E+00   | 1.30E-03  | 6.78E-11 | 2.76E-03 | 2.13E-07 |
| phe.Fasting_rs140070363 S8 | DIAPH1 | rs79781495 S8  | KPNA3       | 2.97E-15 | 1.21E-07   | 8.14E-12  | 1.09E-13 | 4.44E-06 | 6.79E-10 |
| phe.Fasting_rs140070363 S8 | DIAPH1 | rs79886603 S15 | NA          | 8.71E-08 | 1.00E+00   | 6.74E-05  | 4.66E-07 | 1.00E+00 | 5.59E-04 |
| phe.Fasting_rs140070363 S8 | DIAPH1 | rs80200953 S8  | PPP2R5D     | 8.49E-17 | 3.47E-09   | 3.69E-13  | 3.65E-09 | 1.48E-01 | 7.55E-06 |
| phe.Fasting_rs140070363 S8 | DIAPH1 | rs80332465 S5  | KPNA3       | 3.13E-15 | 1.28E-07   | 8.51E-12  | 1.17E-13 | 4.77E-06 | 7.06E-10 |

|              |             |     |        |             |     |           |          |             |            |          |          |          |
|--------------|-------------|-----|--------|-------------|-----|-----------|----------|-------------|------------|----------|----------|----------|
| phe.Fasting_ | rs140070363 | S8  | DIAPH1 | rs80334773  | S5  | KPNA3     | 3.13E-15 | 1.28E-07    | 8.51E-12   | 1.17E-13 | 4.77E-06 | 7.06E-10 |
| phe.Fasting_ | rs140524622 | S7  | MRPL10 | rs57503635  | S3  | NA        | 1.82E-07 | 1.00E+00    | 1.30E-04   | 9.03E-16 | 3.68E-08 | 1.16E-11 |
| phe.Fasting_ | rs140524622 | S7  | MRPL10 | rs7256517   | S7  | CYTH2     | 2.58E-07 | 1.00E+00    | 1.80E-04   | 5.87E-09 | 2.39E-01 | 1.15E-05 |
| phe.Fasting_ | rs140552475 | S5  | LUZP1  | rs112348319 | S8  | SPTLC1    | 4.71E-06 | 1.00E+00    | 2.36E-03   | 4.22E-07 | 1.00E+00 | 5.13E-04 |
| phe.Fasting_ | rs140552475 | S5  | LUZP1  | rs112608164 | S8  | SPTLC1    | 4.71E-06 | 1.00E+00    | 2.36E-03   | 4.22E-07 | 1.00E+00 | 5.13E-04 |
| phe.Fasting_ | rs140552475 | S5  | LUZP1  | rs113568654 | S12 | SPTLC1    | 4.39E-06 | 1.00E+00    | 2.22E-03   | 3.16E-06 | 1.00E+00 | 3.06E-03 |
| phe.Fasting_ | rs140552475 | S5  | LUZP1  | rs76542405  | S5  | SPTLC1    | 4.71E-06 | 1.00E+00    | 2.36E-03   | 4.22E-07 | 1.00E+00 | 5.13E-04 |
| phe.Fasting_ | rs140552475 | S5  | LUZP1  | rs77523818  | S7  | SPTLC1    | 4.71E-06 | 1.00E+00    | 2.36E-03   | 4.22E-07 | 1.00E+00 | 5.13E-04 |
| phe.Fasting_ | rs140644750 | S13 | DIAPH1 | rs111576333 | S5  | TMEM64    | 2.37E-06 | 1.00E+00    | 1.30E-03   | 5.87E-14 | 2.39E-06 | 3.99E-10 |
| phe.Fasting_ | rs140644750 | S13 | DIAPH1 | rs112089881 | S8  | ZFAND4    | 2.04E-17 | 8.32E-10    | 1.43E-13   | 1.09E-09 | 4.45E-02 | 2.58E-06 |
| phe.Fasting_ | rs140644750 | S13 | DIAPH1 | rs112091318 | S5  | TMEM64    | 7.32E-07 | 1.00E+00    | 4.60E-04   | 3.91E-08 | 1.00E+00 | 6.13E-05 |
| phe.Fasting_ | rs140644750 | S13 | DIAPH1 | rs114334325 | S7  | AP3M2     | 4.51E-15 | 1.84E-07    | 1.18E-11   | 3.87E-07 | 1.00E+00 | 4.75E-04 |
| phe.Fasting_ | rs140644750 | S13 | DIAPH1 | rs114394395 | S7  | AP3M2     | 4.81E-15 | 1.97E-07    | 1.25E-11   | 3.87E-07 | 1.00E+00 | 4.75E-04 |
| phe.Fasting_ | rs140644750 | S13 | DIAPH1 | rs114565620 | S8  | RCL1      | 1.82E-16 | 7.42E-09    | 6.37E-13   | 3.70E-08 | 1.00E+00 | 5.84E-05 |
| phe.Fasting_ | rs140644750 | S13 | DIAPH1 | rs115083290 | S19 | NA        | 4.38E-16 | 1.79E-08    | 1.40E-12   | 1.42E-08 | 5.77E-01 | 2.53E-05 |
| phe.Fasting_ | rs140644750 | S13 | DIAPH1 | rs11524145  | S5  | CDK6      | 7.80E-07 | 1.00E+00    | 4.86E-04   | 7.89E-06 | 1.00E+00 | 6.69E-03 |
| phe.Fasting_ | rs140644750 | S13 | DIAPH1 | rs115752779 | S19 | NA        | 4.38E-16 | 1.79E-08    | 1.40E-12   | 1.42E-08 | 5.77E-01 | 2.53E-05 |
| phe.Fasting_ | rs140644750 | S13 | DIAPH1 | rs115787552 | S5  | KPNA3     | 2.97E-15 | 1.21E-07    | 8.14E-12   | 1.18E-13 | 4.80E-06 | 7.06E-10 |
| phe.Fasting_ | rs140644750 | S13 | DIAPH1 | rs115888477 | S8  | NA        | 2.03E-14 | 8.28E-07    | 5.02E-11   | 2.21E-14 | 8.99E-07 | 1.73E-10 |
| phe.Fasting_ | rs140644750 | S13 | DIAPH1 | rs116011837 | S9  | BRD2      | 4.89E-11 | 2.00E-03    | 6.62E-08   | 4.07E-14 | 1.66E-06 | 2.85E-10 |
| phe.Fasting_ | rs140644750 | S13 | DIAPH1 | rs116079984 | S8  | KPNA3     | 2.97E-15 | 1.21E-07    | 8.14E-12   | 1.24E-13 | 5.04E-06 | 7.34E-10 |
| phe.Fasting_ | rs140644750 | S13 | DIAPH1 | rs116120727 | S9  | BRD2      | 4.89E-11 | 2.00E-03    | 6.62E-08   | 4.07E-14 | 1.66E-06 | 2.85E-10 |
| phe.Fasting_ | rs140644750 | S13 | DIAPH1 | rs116406581 | S2  | NA        | 1.81E-14 | 7.39E-07    | 4.52E-11   | 2.35E-07 | 1.00E+00 | 3.05E-04 |
| phe.Fasting_ | rs140644750 | S13 | DIAPH1 | rs116548615 | S8  | TMEM45B   | 1.73E-16 | 7.06E-09    | 6.15E-13   | 8.70E-12 | 3.54E-04 | 3.26E-08 |
| phe.Fasting_ | rs140644750 | S13 | DIAPH1 | rs116696844 | S3  | AP3M2     | 6.92E-15 | 2.83E-07    | 1.78E-11   | 3.87E-07 | 1.00E+00 | 4.75E-04 |
| phe.Fasting_ | rs140644750 | S13 | DIAPH1 | rs11989304  | S4  | TMEM64    | 2.37E-06 | 1           | 0.00129547 | 6.78E-11 | 2.76E-03 | 2.13E-07 |
| phe.Fasting_ | rs140644750 | S13 | DIAPH1 | rs140524622 | S7  | MRPL10    | 1.08E-16 | 4.41E-09    | 4.54E-13   | 7.35E-06 | 1.00E+00 | 6.31E-03 |
| phe.Fasting_ | rs140644750 | S13 | DIAPH1 | rs146815317 | S5  | KPNA3     | 2.97E-15 | 1.21E-07    | 8.14E-12   | 1.18E-13 | 4.80E-06 | 7.06E-10 |
| phe.Fasting_ | rs140644750 | S13 | DIAPH1 | rs150117838 | S8  | KPNA3     | 2.97E-15 | 1.21E-07    | 8.14E-12   | 1.09E-13 | 4.44E-06 | 6.79E-10 |
| phe.Fasting_ | rs140644750 | S13 | DIAPH1 | rs150916187 | S4  | HIST1H2BK | 1.38E-05 | 1           | 0.00605332 | 1.37E-14 | 5.59E-07 | 1.16E-10 |
| phe.Fasting_ | rs140644750 | S13 | DIAPH1 | rs16894241  | S4  | HIST1H2BK | 1.99E-11 | 0.000812315 | 2.96E-08   | 3.44E-14 | 1.40E-06 | 2.50E-10 |
| phe.Fasting_ | rs140644750 | S13 | DIAPH1 | rs2032062   | S8  | NA        | 1.22E-14 | 4.98E-07    | 3.09E-11   | 8.48E-06 | 1.00E+00 | 7.14E-03 |
| phe.Fasting_ | rs140644750 | S13 | DIAPH1 | rs2153597   | S8  | ZNF438    | 5.51E-11 | 0.00224928  | 7.42E-08   | 4.52E-09 | 1.84E-01 | 9.08E-06 |
| phe.Fasting_ | rs140644750 | S13 | DIAPH1 | rs2835656   | S7  | TTC3      | 3.01E-10 | 0.0122766   | 3.60E-07   | 9.12E-06 | 1.00E+00 | 7.57E-03 |
| phe.Fasting_ | rs140644750 | S13 | DIAPH1 | rs34801978  | S3  | HOXB2     | 1.23E-05 | 1           | 0.00545724 | 1.03E-08 | 4.19E-01 | 1.90E-05 |
| phe.Fasting_ | rs140644750 | S13 | DIAPH1 | rs352346    | S3  | GRPEL2    | 1.85E-11 | 0.000754995 | 2.78E-08   | 8.42E-06 | 1.00E+00 | 7.10E-03 |
| phe.Fasting_ | rs140644750 | S13 | DIAPH1 | rs3750898   | S8  | DCLRE1A   | 2.29E-05 | 1           | 0.0093502  | 8.76E-06 | 1.00E+00 | 7.32E-03 |
| phe.Fasting_ | rs140644750 | S13 | DIAPH1 | rs4732511   | S13 | POR       | 2.30E-15 | 9.39E-08    | 6.48E-12   | 9.65E-06 | 1.00E+00 | 7.93E-03 |
| phe.Fasting_ | rs140644750 | S13 | DIAPH1 | rs57503635  | S3  | NA        | 6.34E-16 | 2.59E-08    | 1.95E-12   | 3.17E-14 | 1.29E-06 | 2.34E-10 |
| phe.Fasting_ | rs140644750 | S13 | DIAPH1 | rs58905476  | S7  | TTC3      | 3.29E-10 | 0.0134302   | 3.90E-07   | 9.79E-06 | 1.00E+00 | 8.01E-03 |

|              |             |     |        |             |     |             |          |            |             |          |          |          |
|--------------|-------------|-----|--------|-------------|-----|-------------|----------|------------|-------------|----------|----------|----------|
| phe.Fasting_ | rs140644750 | S13 | DIAPH1 | rs60011869  | S16 | NA          | 1.04E-05 | 1          | 0.00472365  | 8.16E-10 | 3.32E-02 | 1.98E-06 |
| phe.Fasting_ | rs140644750 | S13 | DIAPH1 | rs6964407   | S7  | POR         | 7.55E-15 | 3.08E-07   | 1.94E-11    | 8.91E-06 | 1.00E+00 | 7.43E-03 |
| phe.Fasting_ | rs140644750 | S13 | DIAPH1 | rs7004597   | S8  | NA          | 4.51E-15 | 1.84E-07   | 1.18E-11    | 2.34E-07 | 1.00E+00 | 3.04E-04 |
| phe.Fasting_ | rs140644750 | S13 | DIAPH1 | rs7256517   | S7  | CYTH2       | 1.04E-15 | 4.24E-08   | 3.06E-12    | 4.82E-12 | 1.96E-04 | 1.91E-08 |
| phe.Fasting_ | rs140644750 | S13 | DIAPH1 | rs73283603  | S7  | ZWINT       | 1.90E-06 | 1          | 0.0010688   | 2.03E-07 | 1.00E+00 | 2.68E-04 |
| phe.Fasting_ | rs140644750 | S13 | DIAPH1 | rs73392640  | S8  | POLR3B      | 2.02E-10 | 0.00826001 | 2.49E-07    | 5.19E-11 | 2.11E-03 | 1.67E-07 |
| phe.Fasting_ | rs140644750 | S13 | DIAPH1 | rs734069    | S19 | NA          | 2.06E-08 | 0.839421   | 1.81E-05    | 6.71E-10 | 2.73E-02 | 1.68E-06 |
| phe.Fasting_ | rs140644750 | S13 | DIAPH1 | rs73619637  | S8  | NA          | 1.44E-15 | 5.89E-08   | 4.14E-12    | 2.05E-10 | 8.34E-03 | 5.78E-07 |
| phe.Fasting_ | rs140644750 | S13 | DIAPH1 | rs74627895  | S8  | TMEM64      | 7.32E-07 | 1          | 0.000459899 | 2.03E-08 | 8.28E-01 | 3.48E-05 |
| phe.Fasting_ | rs140644750 | S13 | DIAPH1 | rs74914207  | S24 | NA          | 1.37E-10 | 0.00558626 | 1.73E-07    | 9.12E-11 | 3.71E-03 | 2.80E-07 |
| phe.Fasting_ | rs140644750 | S13 | DIAPH1 | rs75350765  | S5  | RCL1        | 1.82E-16 | 7.42E-09   | 6.37E-13    | 3.70E-08 | 1.00E+00 | 5.84E-05 |
| phe.Fasting_ | rs140644750 | S13 | DIAPH1 | rs75374128  | S5  | CNTLN       | 1.47E-16 | 6.01E-09   | 5.72E-13    | 1.01E-07 | 1.00E+00 | 1.42E-04 |
| phe.Fasting_ | rs140644750 | S13 | DIAPH1 | rs75506779  | S5  | TMCO3       | 5.55E-07 | 1          | 0.000360863 | 1.10E-08 | 4.50E-01 | 2.03E-05 |
| phe.Fasting_ | rs140644750 | S13 | DIAPH1 | rs75758702  | S24 | NA          | 7.02E-17 | 2.87E-09   | 3.16E-13    | 1.57E-10 | 6.38E-03 | 4.59E-07 |
| phe.Fasting_ | rs140644750 | S13 | DIAPH1 | rs75864203  | S8  | CNTLN       | 1.47E-16 | 6.01E-09   | 5.72E-13    | 1.01E-07 | 1.00E+00 | 1.42E-04 |
| phe.Fasting_ | rs140644750 | S13 | DIAPH1 | rs75949566  | S5  | TMEM64      | 2.76E-06 | 1          | 0.001473    | 8.48E-11 | 3.45E-03 | 2.62E-07 |
| phe.Fasting_ | rs140644750 | S13 | DIAPH1 | rs76844308  | S8  | CNTLN       | 7.68E-17 | 3.14E-09   | 3.41E-13    | 9.52E-08 | 1.00E+00 | 1.35E-04 |
| phe.Fasting_ | rs140644750 | S13 | DIAPH1 | rs7763107   | S8  | FARS2       | 5.78E-16 | 2.36E-08   | 1.79E-12    | 9.23E-12 | 3.76E-04 | 3.44E-08 |
| phe.Fasting_ | rs140644750 | S13 | DIAPH1 | rs77798597  | S7  | KPNA3       | 2.97E-15 | 1.21E-07   | 8.14E-12    | 1.09E-13 | 4.44E-06 | 6.79E-10 |
| phe.Fasting_ | rs140644750 | S13 | DIAPH1 | rs77845645  | S21 | NA          | 1.53E-06 | 1          | 0.000888475 | 4.20E-11 | 1.71E-03 | 1.38E-07 |
| phe.Fasting_ | rs140644750 | S13 | DIAPH1 | rs78353402  | S8  | AP3M2       | 4.51E-15 | 1.84E-07   | 1.18E-11    | 3.87E-07 | 1.00E+00 | 4.75E-04 |
| phe.Fasting_ | rs140644750 | S13 | DIAPH1 | rs78516788  | S8  | SLC38A1     | 2.75E-11 | 0.00112269 | 3.94E-08    | 2.44E-10 | 9.93E-03 | 6.74E-07 |
| phe.Fasting_ | rs140644750 | S13 | DIAPH1 | rs78697063  | S5  | MSI2        | 8.23E-19 | 3.36E-11   | 2.70E-14    | 6.84E-10 | 2.78E-02 | 1.70E-06 |
| phe.Fasting_ | rs140644750 | S13 | DIAPH1 | rs78722272  | S5  | CNTLN       | 1.47E-16 | 6.01E-09   | 5.72E-13    | 1.05E-07 | 1.00E+00 | 1.48E-04 |
| phe.Fasting_ | rs140644750 | S13 | DIAPH1 | rs78736524  | S5  | KPNA3       | 2.97E-15 | 1.21E-07   | 8.14E-12    | 1.18E-13 | 4.80E-06 | 7.06E-10 |
| phe.Fasting_ | rs140644750 | S13 | DIAPH1 | rs78990344  | S2  | LOC10050631 | 2.37E-06 | 1          | 0.00129547  | 6.78E-11 | 2.76E-03 | 2.13E-07 |
| phe.Fasting_ | rs140644750 | S13 | DIAPH1 | rs79781495  | S8  | KPNA3       | 2.97E-15 | 1.21E-07   | 8.14E-12    | 1.09E-13 | 4.44E-06 | 6.79E-10 |
| phe.Fasting_ | rs140644750 | S13 | DIAPH1 | rs79886603  | S15 | NA          | 8.71E-08 | 1          | 6.74E-05    | 4.66E-07 | 1.00E+00 | 5.59E-04 |
| phe.Fasting_ | rs140644750 | S13 | DIAPH1 | rs80200953  | S8  | PPP2R5D     | 8.49E-17 | 3.47E-09   | 3.69E-13    | 3.65E-09 | 1.48E-01 | 7.55E-06 |
| phe.Fasting_ | rs140644750 | S13 | DIAPH1 | rs80332465  | S5  | KPNA3       | 3.13E-15 | 1.28E-07   | 8.51E-12    | 1.17E-13 | 4.77E-06 | 7.06E-10 |
| phe.Fasting_ | rs140644750 | S13 | DIAPH1 | rs80334773  | S5  | KPNA3       | 3.13E-15 | 1.28E-07   | 8.51E-12    | 1.17E-13 | 4.77E-06 | 7.06E-10 |
| phe.Fasting_ | rs141022544 | S8  | DIAPH1 | rs111576333 | S5  | TMEM64      | 2.37E-06 | 1          | 0.00129547  | 5.87E-14 | 2.39E-06 | 3.99E-10 |
| phe.Fasting_ | rs141022544 | S8  | DIAPH1 | rs112089881 | S8  | ZFAND4      | 2.04E-17 | 8.32E-10   | 1.43E-13    | 1.09E-09 | 4.45E-02 | 2.58E-06 |
| phe.Fasting_ | rs141022544 | S8  | DIAPH1 | rs112091318 | S5  | TMEM64      | 7.32E-07 | 1          | 0.000459899 | 3.91E-08 | 1.00E+00 | 6.13E-05 |
| phe.Fasting_ | rs141022544 | S8  | DIAPH1 | rs114334325 | S7  | AP3M2       | 4.51E-15 | 1.84E-07   | 1.18E-11    | 3.87E-07 | 1.00E+00 | 4.75E-04 |
| phe.Fasting_ | rs141022544 | S8  | DIAPH1 | rs114394395 | S7  | AP3M2       | 4.81E-15 | 1.97E-07   | 1.25E-11    | 3.87E-07 | 1.00E+00 | 4.75E-04 |
| phe.Fasting_ | rs141022544 | S8  | DIAPH1 | rs114565620 | S8  | RCL1        | 1.82E-16 | 7.42E-09   | 6.37E-13    | 3.70E-08 | 1.00E+00 | 5.84E-05 |
| phe.Fasting_ | rs141022544 | S8  | DIAPH1 | rs115083290 | S19 | NA          | 4.38E-16 | 1.79E-08   | 1.40E-12    | 1.42E-08 | 5.77E-01 | 2.53E-05 |
| phe.Fasting_ | rs141022544 | S8  | DIAPH1 | rs11524145  | S5  | CDK6        | 7.80E-07 | 1          | 0.000486356 | 7.89E-06 | 1.00E+00 | 6.69E-03 |
| phe.Fasting_ | rs141022544 | S8  | DIAPH1 | rs115752779 | S19 | NA          | 4.38E-16 | 1.79E-08   | 1.40E-12    | 1.42E-08 | 5.77E-01 | 2.53E-05 |

|                            |        |                |           |          |             |             |          |          |          |
|----------------------------|--------|----------------|-----------|----------|-------------|-------------|----------|----------|----------|
| phe.Fasting_rs141022544 S8 | DIAPH1 | rs115787552 S5 | KPNA3     | 2.97E-15 | 1.21E-07    | 8.14E-12    | 1.18E-13 | 4.80E-06 | 7.06E-10 |
| phe.Fasting_rs141022544 S8 | DIAPH1 | rs115888477 S8 | NA        | 2.03E-14 | 8.28E-07    | 5.02E-11    | 2.21E-14 | 8.99E-07 | 1.73E-10 |
| phe.Fasting_rs141022544 S8 | DIAPH1 | rs116011837 S9 | BRD2      | 4.89E-11 | 0.00199774  | 6.62E-08    | 4.07E-14 | 1.66E-06 | 2.85E-10 |
| phe.Fasting_rs141022544 S8 | DIAPH1 | rs116079984 S8 | KPNA3     | 2.97E-15 | 1.21E-07    | 8.14E-12    | 1.24E-13 | 5.04E-06 | 7.34E-10 |
| phe.Fasting_rs141022544 S8 | DIAPH1 | rs116120727 S9 | BRD2      | 4.89E-11 | 0.00199774  | 6.62E-08    | 4.07E-14 | 1.66E-06 | 2.85E-10 |
| phe.Fasting_rs141022544 S8 | DIAPH1 | rs116406581 S2 | NA        | 1.81E-14 | 7.39E-07    | 4.52E-11    | 2.35E-07 | 1.00E+00 | 3.05E-04 |
| phe.Fasting_rs141022544 S8 | DIAPH1 | rs116548615 S8 | TMEM45B   | 1.73E-16 | 7.06E-09    | 6.15E-13    | 8.70E-12 | 3.54E-04 | 3.26E-08 |
| phe.Fasting_rs141022544 S8 | DIAPH1 | rs116696844 S3 | AP3M2     | 6.92E-15 | 2.83E-07    | 1.78E-11    | 3.87E-07 | 1.00E+00 | 4.75E-04 |
| phe.Fasting_rs141022544 S8 | DIAPH1 | rs11989304 S4  | TMEM64    | 2.37E-06 | 1           | 0.00129547  | 6.78E-11 | 2.76E-03 | 2.13E-07 |
| phe.Fasting_rs141022544 S8 | DIAPH1 | rs140524622 S7 | MRPL10    | 1.08E-16 | 4.41E-09    | 4.54E-13    | 7.35E-06 | 1.00E+00 | 6.31E-03 |
| phe.Fasting_rs141022544 S8 | DIAPH1 | rs146815317 S5 | KPNA3     | 2.97E-15 | 1.21E-07    | 8.14E-12    | 1.18E-13 | 4.80E-06 | 7.06E-10 |
| phe.Fasting_rs141022544 S8 | DIAPH1 | rs150117838 S8 | KPNA3     | 2.97E-15 | 1.21E-07    | 8.14E-12    | 1.09E-13 | 4.44E-06 | 6.79E-10 |
| phe.Fasting_rs141022544 S8 | DIAPH1 | rs150916187 S4 | HIST1H2BK | 1.38E-05 | 1           | 0.00605332  | 1.37E-14 | 5.59E-07 | 1.16E-10 |
| phe.Fasting_rs141022544 S8 | DIAPH1 | rs16894241 S4  | HIST1H2BK | 1.99E-11 | 0.000812315 | 2.96E-08    | 3.44E-14 | 1.40E-06 | 2.50E-10 |
| phe.Fasting_rs141022544 S8 | DIAPH1 | rs2032062 S8   | NA        | 1.22E-14 | 4.98E-07    | 3.09E-11    | 8.48E-06 | 1.00E+00 | 7.14E-03 |
| phe.Fasting_rs141022544 S8 | DIAPH1 | rs2153597 S8   | ZNF438    | 5.51E-11 | 0.00224928  | 7.42E-08    | 4.52E-09 | 1.84E-01 | 9.08E-06 |
| phe.Fasting_rs141022544 S8 | DIAPH1 | rs2835656 S7   | TTC3      | 3.01E-10 | 0.0122766   | 3.60E-07    | 9.12E-06 | 1.00E+00 | 7.57E-03 |
| phe.Fasting_rs141022544 S8 | DIAPH1 | rs34801978 S3  | HOXB2     | 1.23E-05 | 1           | 0.00545724  | 1.03E-08 | 4.19E-01 | 1.90E-05 |
| phe.Fasting_rs141022544 S8 | DIAPH1 | rs352346 S3    | GRPEL2    | 1.85E-11 | 0.000754995 | 2.78E-08    | 8.42E-06 | 1.00E+00 | 7.10E-03 |
| phe.Fasting_rs141022544 S8 | DIAPH1 | rs3750898 S8   | DCLRE1A   | 2.29E-05 | 1           | 0.0093502   | 8.76E-06 | 1.00E+00 | 7.32E-03 |
| phe.Fasting_rs141022544 S8 | DIAPH1 | rs4732511 S13  | POR       | 2.30E-15 | 9.39E-08    | 6.48E-12    | 9.65E-06 | 1.00E+00 | 7.93E-03 |
| phe.Fasting_rs141022544 S8 | DIAPH1 | rs57503635 S3  | NA        | 6.34E-16 | 2.59E-08    | 1.95E-12    | 3.17E-14 | 1.29E-06 | 2.34E-10 |
| phe.Fasting_rs141022544 S8 | DIAPH1 | rs58905476 S7  | TTC3      | 3.29E-10 | 0.0134302   | 3.90E-07    | 9.79E-06 | 1.00E+00 | 8.01E-03 |
| phe.Fasting_rs141022544 S8 | DIAPH1 | rs60011869 S16 | NA        | 1.04E-05 | 1           | 0.00472365  | 8.16E-10 | 3.32E-02 | 1.98E-06 |
| phe.Fasting_rs141022544 S8 | DIAPH1 | rs6964407 S7   | POR       | 7.55E-15 | 3.08E-07    | 1.94E-11    | 8.91E-06 | 1.00E+00 | 7.43E-03 |
| phe.Fasting_rs141022544 S8 | DIAPH1 | rs7004597 S8   | NA        | 4.51E-15 | 1.84E-07    | 1.18E-11    | 2.34E-07 | 1.00E+00 | 3.04E-04 |
| phe.Fasting_rs141022544 S8 | DIAPH1 | rs7256517 S7   | CYTH2     | 1.04E-15 | 4.24E-08    | 3.06E-12    | 4.82E-12 | 1.96E-04 | 1.91E-08 |
| phe.Fasting_rs141022544 S8 | DIAPH1 | rs73283603 S7  | ZWINT     | 1.90E-06 | 1           | 0.0010688   | 2.03E-07 | 1.00E+00 | 2.68E-04 |
| phe.Fasting_rs141022544 S8 | DIAPH1 | rs73392640 S8  | POLR3B    | 2.02E-10 | 0.00826001  | 2.49E-07    | 5.19E-11 | 2.11E-03 | 1.67E-07 |
| phe.Fasting_rs141022544 S8 | DIAPH1 | rs734069 S19   | NA        | 2.06E-08 | 0.839421    | 1.81E-05    | 6.71E-10 | 2.73E-02 | 1.68E-06 |
| phe.Fasting_rs141022544 S8 | DIAPH1 | rs73619637 S8  | NA        | 1.44E-15 | 5.89E-08    | 4.14E-12    | 2.05E-10 | 8.34E-03 | 5.78E-07 |
| phe.Fasting_rs141022544 S8 | DIAPH1 | rs74627895 S8  | TMEM64    | 7.32E-07 | 1           | 0.000459899 | 2.03E-08 | 8.28E-01 | 3.48E-05 |
| phe.Fasting_rs141022544 S8 | DIAPH1 | rs74914207 S24 | NA        | 1.37E-10 | 0.00558626  | 1.73E-07    | 9.12E-11 | 3.71E-03 | 2.80E-07 |
| phe.Fasting_rs141022544 S8 | DIAPH1 | rs75350765 S5  | RCL1      | 1.82E-16 | 7.42E-09    | 6.37E-13    | 3.70E-08 | 1.00E+00 | 5.84E-05 |
| phe.Fasting_rs141022544 S8 | DIAPH1 | rs75374128 S5  | CNTLN     | 1.47E-16 | 6.01E-09    | 5.72E-13    | 1.01E-07 | 1.00E+00 | 1.42E-04 |
| phe.Fasting_rs141022544 S8 | DIAPH1 | rs75506779 S5  | TMCO3     | 5.55E-07 | 1           | 0.000360863 | 1.10E-08 | 4.50E-01 | 2.03E-05 |
| phe.Fasting_rs141022544 S8 | DIAPH1 | rs75758702 S24 | NA        | 7.02E-17 | 2.87E-09    | 3.16E-13    | 1.57E-10 | 6.38E-03 | 4.59E-07 |
| phe.Fasting_rs141022544 S8 | DIAPH1 | rs75864203 S8  | CNTLN     | 1.47E-16 | 6.01E-09    | 5.72E-13    | 1.01E-07 | 1.00E+00 | 1.42E-04 |
| phe.Fasting_rs141022544 S8 | DIAPH1 | rs75949566 S5  | TMEM64    | 2.76E-06 | 1           | 0.001473    | 8.48E-11 | 3.45E-03 | 2.62E-07 |
| phe.Fasting_rs141022544 S8 | DIAPH1 | rs76844308 S8  | CNTLN     | 7.68E-17 | 3.14E-09    | 3.41E-13    | 9.52E-08 | 1.00E+00 | 1.35E-04 |

|                           |        |             |     |             |          |             |             |          |          |          |
|---------------------------|--------|-------------|-----|-------------|----------|-------------|-------------|----------|----------|----------|
| phe.Fasting_rs141022544S8 | DIAPH1 | rs7763107   | S8  | FARS2       | 5.78E-16 | 2.36E-08    | 1.79E-12    | 9.23E-12 | 3.76E-04 | 3.44E-08 |
| phe.Fasting_rs141022544S8 | DIAPH1 | rs77798597  | S7  | KPNA3       | 2.97E-15 | 1.21E-07    | 8.14E-12    | 1.09E-13 | 4.44E-06 | 6.79E-10 |
| phe.Fasting_rs141022544S8 | DIAPH1 | rs77845645  | S21 | NA          | 1.53E-06 | 1           | 0.000888475 | 4.20E-11 | 1.71E-03 | 1.38E-07 |
| phe.Fasting_rs141022544S8 | DIAPH1 | rs78353402  | S8  | AP3M2       | 4.51E-15 | 1.84E-07    | 1.18E-11    | 3.87E-07 | 1.00E+00 | 4.75E-04 |
| phe.Fasting_rs141022544S8 | DIAPH1 | rs78516788  | S8  | SLC38A1     | 2.75E-11 | 1.12E-03    | 3.94E-08    | 2.44E-10 | 9.93E-03 | 6.74E-07 |
| phe.Fasting_rs141022544S8 | DIAPH1 | rs78697063  | S5  | MSI2        | 8.23E-19 | 3.36E-11    | 2.70E-14    | 6.84E-10 | 2.78E-02 | 1.70E-06 |
| phe.Fasting_rs141022544S8 | DIAPH1 | rs78722272  | S5  | CNTLN       | 1.47E-16 | 6.01E-09    | 5.72E-13    | 1.05E-07 | 1.00E+00 | 1.48E-04 |
| phe.Fasting_rs141022544S8 | DIAPH1 | rs78736524  | S5  | KPNA3       | 2.97E-15 | 1.21E-07    | 8.14E-12    | 1.18E-13 | 4.80E-06 | 7.06E-10 |
| phe.Fasting_rs141022544S8 | DIAPH1 | rs78990344  | S2  | LOC10050631 | 2.37E-06 | 1           | 0.00129547  | 6.78E-11 | 2.76E-03 | 2.13E-07 |
| phe.Fasting_rs141022544S8 | DIAPH1 | rs79781495  | S8  | KPNA3       | 2.97E-15 | 1.21E-07    | 8.14E-12    | 1.09E-13 | 4.44E-06 | 6.79E-10 |
| phe.Fasting_rs141022544S8 | DIAPH1 | rs79886603  | S15 | NA          | 8.71E-08 | 1           | 6.74E-05    | 4.66E-07 | 1.00E+00 | 5.59E-04 |
| phe.Fasting_rs141022544S8 | DIAPH1 | rs80200953  | S8  | PPP2R5D     | 8.49E-17 | 3.47E-09    | 3.69E-13    | 3.65E-09 | 1.48E-01 | 7.55E-06 |
| phe.Fasting_rs141022544S8 | DIAPH1 | rs80332465  | S5  | KPNA3       | 3.13E-15 | 1.28E-07    | 8.51E-12    | 1.17E-13 | 4.77E-06 | 7.06E-10 |
| phe.Fasting_rs141022544S8 | DIAPH1 | rs80334773  | S5  | KPNA3       | 3.13E-15 | 1.28E-07    | 8.51E-12    | 1.17E-13 | 4.77E-06 | 7.06E-10 |
| phe.Fasting_rs141525984S5 | DIAPH1 | rs111576333 | S5  | TMEM64      | 2.37E-06 | 1           | 0.00129547  | 5.87E-14 | 2.39E-06 | 3.99E-10 |
| phe.Fasting_rs141525984S5 | DIAPH1 | rs112089881 | S8  | ZFAND4      | 2.04E-17 | 8.32E-10    | 1.43E-13    | 1.09E-09 | 4.45E-02 | 2.58E-06 |
| phe.Fasting_rs141525984S5 | DIAPH1 | rs112091318 | S5  | TMEM64      | 7.32E-07 | 1           | 0.000459899 | 3.91E-08 | 1.00E+00 | 6.13E-05 |
| phe.Fasting_rs141525984S5 | DIAPH1 | rs114334325 | S7  | AP3M2       | 4.51E-15 | 1.84E-07    | 1.18E-11    | 3.87E-07 | 1.00E+00 | 4.75E-04 |
| phe.Fasting_rs141525984S5 | DIAPH1 | rs114394395 | S7  | AP3M2       | 4.81E-15 | 1.97E-07    | 1.25E-11    | 3.87E-07 | 1.00E+00 | 4.75E-04 |
| phe.Fasting_rs141525984S5 | DIAPH1 | rs114565620 | S8  | RCL1        | 1.82E-16 | 7.42E-09    | 6.37E-13    | 3.70E-08 | 1.00E+00 | 5.84E-05 |
| phe.Fasting_rs141525984S5 | DIAPH1 | rs115083290 | S19 | NA          | 4.38E-16 | 1.79E-08    | 1.40E-12    | 1.42E-08 | 5.77E-01 | 2.53E-05 |
| phe.Fasting_rs141525984S5 | DIAPH1 | rs11524145  | S5  | CDK6        | 7.80E-07 | 1           | 0.000486356 | 7.89E-06 | 1.00E+00 | 6.69E-03 |
| phe.Fasting_rs141525984S5 | DIAPH1 | rs115752779 | S19 | NA          | 4.38E-16 | 1.79E-08    | 1.40E-12    | 1.42E-08 | 5.77E-01 | 2.53E-05 |
| phe.Fasting_rs141525984S5 | DIAPH1 | rs115787552 | S5  | KPNA3       | 2.97E-15 | 1.21E-07    | 8.14E-12    | 1.18E-13 | 4.80E-06 | 7.06E-10 |
| phe.Fasting_rs141525984S5 | DIAPH1 | rs115888477 | S8  | NA          | 2.03E-14 | 8.28E-07    | 5.02E-11    | 2.21E-14 | 8.99E-07 | 1.73E-10 |
| phe.Fasting_rs141525984S5 | DIAPH1 | rs116011837 | S9  | BRD2        | 4.89E-11 | 0.00199774  | 6.62E-08    | 4.07E-14 | 1.66E-06 | 2.85E-10 |
| phe.Fasting_rs141525984S5 | DIAPH1 | rs116079984 | S8  | KPNA3       | 2.97E-15 | 1.21E-07    | 8.14E-12    | 1.24E-13 | 5.04E-06 | 7.34E-10 |
| phe.Fasting_rs141525984S5 | DIAPH1 | rs116120727 | S9  | BRD2        | 4.89E-11 | 0.00199774  | 6.62E-08    | 4.07E-14 | 1.66E-06 | 2.85E-10 |
| phe.Fasting_rs141525984S5 | DIAPH1 | rs116406581 | S2  | NA          | 1.81E-14 | 7.39E-07    | 4.52E-11    | 2.35E-07 | 1.00E+00 | 3.05E-04 |
| phe.Fasting_rs141525984S5 | DIAPH1 | rs116548615 | S8  | TMEM45B     | 1.73E-16 | 7.06E-09    | 6.15E-13    | 8.70E-12 | 3.54E-04 | 3.26E-08 |
| phe.Fasting_rs141525984S5 | DIAPH1 | rs116696844 | S3  | AP3M2       | 6.92E-15 | 2.83E-07    | 1.78E-11    | 3.87E-07 | 1.00E+00 | 4.75E-04 |
| phe.Fasting_rs141525984S5 | DIAPH1 | rs11989304  | S4  | TMEM64      | 2.37E-06 | 1           | 0.00129547  | 6.78E-11 | 2.76E-03 | 2.13E-07 |
| phe.Fasting_rs141525984S5 | DIAPH1 | rs140524622 | S7  | MRPL10      | 1.08E-16 | 4.41E-09    | 4.54E-13    | 7.35E-06 | 1.00E+00 | 6.31E-03 |
| phe.Fasting_rs141525984S5 | DIAPH1 | rs146815317 | S5  | KPNA3       | 2.97E-15 | 1.21E-07    | 8.14E-12    | 1.18E-13 | 4.80E-06 | 7.06E-10 |
| phe.Fasting_rs141525984S5 | DIAPH1 | rs150117838 | S8  | KPNA3       | 2.97E-15 | 1.21E-07    | 8.14E-12    | 1.09E-13 | 4.44E-06 | 6.79E-10 |
| phe.Fasting_rs141525984S5 | DIAPH1 | rs150916187 | S4  | HIST1H2BK   | 1.38E-05 | 1           | 0.00605332  | 1.37E-14 | 5.59E-07 | 1.16E-10 |
| phe.Fasting_rs141525984S5 | DIAPH1 | rs16894241  | S4  | HIST1H2BK   | 1.99E-11 | 0.000812315 | 2.96E-08    | 3.44E-14 | 1.40E-06 | 2.50E-10 |
| phe.Fasting_rs141525984S5 | DIAPH1 | rs2032062   | S8  | NA          | 1.22E-14 | 4.98E-07    | 3.09E-11    | 8.48E-06 | 1.00E+00 | 7.14E-03 |
| phe.Fasting_rs141525984S5 | DIAPH1 | rs2153597   | S8  | ZNF438      | 5.51E-11 | 0.00224928  | 7.42E-08    | 4.52E-09 | 1.84E-01 | 9.08E-06 |
| phe.Fasting_rs141525984S5 | DIAPH1 | rs2835656   | S7  | TTC3        | 3.01E-10 | 0.0122766   | 3.60E-07    | 9.12E-06 | 1.00E+00 | 7.57E-03 |

|                           |                         |            |     |            |          |             |             |          |          |          |
|---------------------------|-------------------------|------------|-----|------------|----------|-------------|-------------|----------|----------|----------|
| phe.Fasting_rs141525984S5 | DIAPH1                  | rs34801978 | S3  | HOXB2      | 1.23E-05 | 1           | 0.00545724  | 1.03E-08 | 4.19E-01 | 1.90E-05 |
| phe.Fasting_rs141525984S5 | DIAPH1                  | rs352346   | S3  | GRPEL2     | 1.85E-11 | 0.000754995 | 2.78E-08    | 8.42E-06 | 1.00E+00 | 7.10E-03 |
| phe.Fasting_rs141525984S5 | DIAPH1                  | rs3750898  | S8  | DCLRE1A    | 2.29E-05 | 1           | 0.0093502   | 8.76E-06 | 1.00E+00 | 7.32E-03 |
| phe.Fasting_rs141525984S5 | DIAPH1                  | rs4732511  | S13 | POR        | 2.30E-15 | 9.39E-08    | 6.48E-12    | 9.65E-06 | 1.00E+00 | 7.93E-03 |
| phe.Fasting_rs141525984S5 | DIAPH1                  | rs57503635 | S3  | NA         | 6.34E-16 | 2.59E-08    | 1.95E-12    | 3.17E-14 | 1.29E-06 | 2.34E-10 |
| phe.Fasting_rs141525984S5 | DIAPH1                  | rs58905476 | S7  | TTC3       | 3.29E-10 | 0.0134302   | 3.90E-07    | 9.79E-06 | 1.00E+00 | 8.01E-03 |
| phe.Fasting_rs141525984S5 | DIAPH1                  | rs60011869 | S16 | NA         | 1.04E-05 | 1           | 0.00472365  | 8.16E-10 | 3.32E-02 | 1.98E-06 |
| phe.Fasting_rs141525984S5 | DIAPH1                  | rs6964407  | S7  | POR        | 7.55E-15 | 3.08E-07    | 1.94E-11    | 8.91E-06 | 1.00E+00 | 7.43E-03 |
| phe.Fasting_rs141525984S5 | DIAPH1                  | rs7004597  | S8  | NA         | 4.51E-15 | 1.84E-07    | 1.18E-11    | 2.34E-07 | 1.00E+00 | 3.04E-04 |
| phe.Fasting_rs141525984S5 | DIAPH1                  | rs7256517  | S7  | CYTH2      | 1.04E-15 | 4.24E-08    | 3.06E-12    | 4.82E-12 | 1.96E-04 | 1.91E-08 |
| phe.Fasting_rs141525984S5 | DIAPH1                  | rs73283603 | S7  | ZWINT      | 1.90E-06 | 1           | 0.0010688   | 2.03E-07 | 1.00E+00 | 2.68E-04 |
| phe.Fasting_rs141525984S5 | DIAPH1                  | rs73392640 | S8  | POLR3B     | 2.02E-10 | 0.00826001  | 2.49E-07    | 5.19E-11 | 2.11E-03 | 1.67E-07 |
| phe.Fasting_rs141525984S5 | DIAPH1                  | rs734069   | S19 | NA         | 2.06E-08 | 0.839421    | 1.81E-05    | 6.71E-10 | 2.73E-02 | 1.68E-06 |
| phe.Fasting_rs141525984S5 | DIAPH1                  | rs73619637 | S8  | NA         | 1.44E-15 | 5.89E-08    | 4.14E-12    | 2.05E-10 | 8.34E-03 | 5.78E-07 |
| phe.Fasting_rs141525984S5 | DIAPH1                  | rs74627895 | S8  | TMEM64     | 7.32E-07 | 1           | 0.000459899 | 2.03E-08 | 8.28E-01 | 3.48E-05 |
| phe.Fasting_rs141525984S5 | DIAPH1                  | rs74914207 | S24 | NA         | 1.37E-10 | 0.00558626  | 1.73E-07    | 9.12E-11 | 3.71E-03 | 2.80E-07 |
| phe.Fasting_rs141525984S5 | DIAPH1                  | rs75350765 | S5  | RCL1       | 1.82E-16 | 7.42E-09    | 6.37E-13    | 3.70E-08 | 1.00E+00 | 5.84E-05 |
| phe.Fasting_rs141525984S5 | DIAPH1                  | rs75374128 | S5  | CNTLN      | 1.47E-16 | 6.01E-09    | 5.72E-13    | 1.01E-07 | 1.00E+00 | 1.42E-04 |
| phe.Fasting_rs141525984S5 | DIAPH1                  | rs75506779 | S5  | TMCO3      | 5.55E-07 | 1           | 0.000360863 | 1.10E-08 | 4.50E-01 | 2.03E-05 |
| phe.Fasting_rs141525984S5 | DIAPH1                  | rs75758702 | S24 | NA         | 7.02E-17 | 2.87E-09    | 3.16E-13    | 1.57E-10 | 6.38E-03 | 4.59E-07 |
| phe.Fasting_rs141525984S5 | DIAPH1                  | rs75864203 | S8  | CNTLN      | 1.47E-16 | 6.01E-09    | 5.72E-13    | 1.01E-07 | 1.00E+00 | 1.42E-04 |
| phe.Fasting_rs141525984S5 | DIAPH1                  | rs75949566 | S5  | TMEM64     | 2.76E-06 | 1           | 0.001473    | 8.48E-11 | 3.45E-03 | 2.62E-07 |
| phe.Fasting_rs141525984S5 | DIAPH1                  | rs76844308 | S8  | CNTLN      | 7.68E-17 | 3.14E-09    | 3.41E-13    | 9.52E-08 | 1.00E+00 | 1.35E-04 |
| phe.Fasting_rs141525984S5 | DIAPH1                  | rs7763107  | S8  | FARS2      | 5.78E-16 | 2.36E-08    | 1.79E-12    | 9.23E-12 | 3.76E-04 | 3.44E-08 |
| phe.Fasting_rs141525984S5 | DIAPH1                  | rs77798597 | S7  | KPNA3      | 2.97E-15 | 1.21E-07    | 8.14E-12    | 1.09E-13 | 4.44E-06 | 6.79E-10 |
| phe.Fasting_rs141525984S5 | DIAPH1                  | rs77845645 | S21 | NA         | 1.53E-06 | 1           | 0.000888475 | 4.20E-11 | 1.71E-03 | 1.38E-07 |
| phe.Fasting_rs141525984S5 | DIAPH1                  | rs78353402 | S8  | AP3M2      | 4.51E-15 | 1.84E-07    | 1.18E-11    | 3.87E-07 | 1.00E+00 | 4.75E-04 |
| phe.Fasting_rs141525984S5 | DIAPH1                  | rs78516788 | S8  | SLC38A1    | 2.75E-11 | 0.00112269  | 3.94E-08    | 2.44E-10 | 9.93E-03 | 6.74E-07 |
| phe.Fasting_rs141525984S5 | DIAPH1                  | rs78697063 | S5  | MSI2       | 8.23E-19 | 3.36E-11    | 2.70E-14    | 6.84E-10 | 2.78E-02 | 1.70E-06 |
| phe.Fasting_rs141525984S5 | DIAPH1                  | rs78722272 | S5  | CNTLN      | 1.47E-16 | 6.01E-09    | 5.72E-13    | 1.05E-07 | 1.00E+00 | 1.48E-04 |
| phe.Fasting_rs141525984S5 | DIAPH1                  | rs78736524 | S5  | KPNA3      | 2.97E-15 | 1.21E-07    | 8.14E-12    | 1.18E-13 | 4.80E-06 | 7.06E-10 |
| phe.Fasting_rs141525984S5 | DIAPH1                  | rs78990344 | S2  | LOC1005063 | 2.37E-06 | 1           | 0.00129547  | 6.78E-11 | 2.76E-03 | 2.13E-07 |
| phe.Fasting_rs141525984S5 | DIAPH1                  | rs79781495 | S8  | KPNA3      | 2.97E-15 | 1.21E-07    | 8.14E-12    | 1.09E-13 | 4.44E-06 | 6.79E-10 |
| phe.Fasting_rs141525984S5 | DIAPH1                  | rs79886603 | S15 | NA         | 8.71E-08 | 1           | 6.74E-05    | 4.66E-07 | 1.00E+00 | 5.59E-04 |
| phe.Fasting_rs141525984S5 | DIAPH1                  | rs80200953 | S8  | PPP2R5D    | 8.49E-17 | 3.47E-09    | 3.69E-13    | 3.65E-09 | 1.48E-01 | 7.55E-06 |
| phe.Fasting_rs141525984S5 | DIAPH1                  | rs80332465 | S5  | KPNA3      | 3.13E-15 | 1.28E-07    | 8.51E-12    | 1.17E-13 | 4.77E-06 | 7.06E-10 |
| phe.Fasting_rs141525984S5 | DIAPH1                  | rs80334773 | S5  | KPNA3      | 3.13E-15 | 1.28E-07    | 8.51E-12    | 1.17E-13 | 4.77E-06 | 7.06E-10 |
| phe.Fasting_rs141692339S3 | "PCDHGA6,Prs112089881S8 |            |     | ZFAND4     | 2.54E-18 | 1.04E-10    | 4.60E-14    | 4.35E-10 | 1.77E-02 | 1.14E-06 |
| phe.Fasting_rs141692339S3 | "PCDHGA6,Prs112091318S5 |            |     | TMEM64     | 1.78E-05 | 1           | 0.00753355  | 3.54E-07 | 1.00E+00 | 4.39E-04 |
| phe.Fasting_rs141692339S3 | "PCDHGA6,Prs114334325S7 |            |     | AP3M2      | 9.79E-16 | 4.00E-08    | 2.91E-12    | 7.51E-06 | 1.00E+00 | 6.42E-03 |

|                            |                           |           |          |             |             |          |          |          |
|----------------------------|---------------------------|-----------|----------|-------------|-------------|----------|----------|----------|
| phe.Fasting_irs141692339S3 | "PCDHGA6,Prs114394395 S7  | AP3M2     | 1.05E-15 | 4.27E-08    | 3.09E-12    | 7.51E-06 | 1.00E+00 | 6.42E-03 |
| phe.Fasting_irs141692339S3 | "PCDHGA6,Prs114565620 S8  | RCL1      | 1.72E-17 | 7.04E-10    | 1.28E-13    | 1.93E-08 | 7.87E-01 | 3.33E-05 |
| phe.Fasting_irs141692339S3 | "PCDHGA6,Prs115305957 S23 | NA        | 2.18E-05 | 1           | 0.00899214  | 2.10E-12 | 8.56E-05 | 9.14E-09 |
| phe.Fasting_irs141692339S3 | "PCDHGA6,Prs115787552 S5  | KPNA3     | 4.75E-16 | 1.94E-08    | 1.51E-12    | 6.03E-14 | 2.46E-06 | 4.09E-10 |
| phe.Fasting_irs141692339S3 | "PCDHGA6,Prs115888477 S8  | NA        | 3.41E-15 | 1.39E-07    | 9.24E-12    | 1.07E-14 | 4.37E-07 | 9.31E-11 |
| phe.Fasting_irs141692339S3 | "PCDHGA6,Prs116011837 S9  | BRD2      | 1.24E-06 | 1           | 0.000737148 | 9.68E-14 | 3.94E-06 | 6.34E-10 |
| phe.Fasting_irs141692339S3 | "PCDHGA6,Prs116079984 S8  | KPNA3     | 4.75E-16 | 1.94E-08    | 1.51E-12    | 6.40E-14 | 2.60E-06 | 4.33E-10 |
| phe.Fasting_irs141692339S3 | "PCDHGA6,Prs116120727 S9  | BRD2      | 1.24E-06 | 1           | 0.000737148 | 9.68E-14 | 3.94E-06 | 6.34E-10 |
| phe.Fasting_irs141692339S3 | "PCDHGA6,Prs116406581 S2  | NA        | 4.12E-15 | 1.68E-07    | 1.09E-11    | 4.50E-06 | 1.00E+00 | 4.18E-03 |
| phe.Fasting_irs141692339S3 | "PCDHGA6,Prs116548615 S8  | TMEM45B   | 2.56E-17 | 1.05E-09    | 1.58E-13    | 1.16E-11 | 4.72E-04 | 4.26E-08 |
| phe.Fasting_irs141692339S3 | "PCDHGA6,Prs116696844 S3  | AP3M2     | 1.56E-15 | 6.38E-08    | 4.48E-12    | 7.51E-06 | 1.00E+00 | 6.42E-03 |
| phe.Fasting_irs141692339S3 | "PCDHGA6,Prs146815317 S5  | KPNA3     | 4.75E-16 | 1.94E-08    | 1.51E-12    | 6.03E-14 | 2.46E-06 | 4.09E-10 |
| phe.Fasting_irs141692339S3 | "PCDHGA6,Prs1470889 S5    | ZC3H3     | 1.67E-05 | 1           | 0.00713881  | 1.05E-13 | 4.28E-06 | 6.67E-10 |
| phe.Fasting_irs141692339S3 | "PCDHGA6,Prs1470890 S5    | ZC3H3     | 1.67E-05 | 1           | 0.00713881  | 1.05E-13 | 4.28E-06 | 6.67E-10 |
| phe.Fasting_irs141692339S3 | "PCDHGA6,Prs150117838 S8  | KPNA3     | 4.75E-16 | 1.94E-08    | 1.51E-12    | 5.58E-14 | 2.27E-06 | 3.84E-10 |
| phe.Fasting_irs141692339S3 | "PCDHGA6,Prs150916187 S4  | HIST1H2BK | 3.12E-06 | 1           | 0.00163774  | 7.33E-15 | 2.98E-07 | 6.52E-11 |
| phe.Fasting_irs141692339S3 | "PCDHGA6,Prs16894241 S4   | HIST1H2BK | 2.52E-12 | 0.000102951 | 4.68E-09    | 1.70E-14 | 6.91E-07 | 1.40E-10 |
| phe.Fasting_irs141692339S3 | "PCDHGA6,Prs2032062 S8    | NA        | 2.18E-14 | 8.88E-07    | 5.38E-11    | 1.17E-05 | 1.00E+00 | 9.26E-03 |
| phe.Fasting_irs141692339S3 | "PCDHGA6,Prs2153597 S8    | ZNF438    | 6.93E-12 | 0.000282913 | 1.19E-08    | 8.79E-07 | 1.00E+00 | 1.00E-03 |
| phe.Fasting_irs141692339S3 | "PCDHGA6,Prs2835656 S7    | TTC3      | 7.71E-11 | 0.00314643  | 1.02E-07    | 1.26E-05 | 1.00E+00 | 9.77E-03 |
| phe.Fasting_irs141692339S3 | "PCDHGA6,Prs2924507 S5    | ZC3H3     | 1.67E-05 | 1           | 0.00713881  | 1.05E-13 | 4.28E-06 | 6.67E-10 |
| phe.Fasting_irs141692339S3 | "PCDHGA6,Prs2924508 S8    | ZC3H3     | 1.67E-05 | 1           | 0.00713881  | 1.47E-13 | 5.99E-06 | 8.37E-10 |
| phe.Fasting_irs141692339S3 | "PCDHGA6,Prs2924511 S7    | ZC3H3     | 1.67E-05 | 1           | 0.00713881  | 1.35E-13 | 5.50E-06 | 7.86E-10 |
| phe.Fasting_irs141692339S3 | "PCDHGA6,Prs2924512 S7    | ZC3H3     | 1.84E-05 | 1           | 0.00775069  | 3.28E-13 | 1.34E-05 | 1.79E-09 |
| phe.Fasting_irs141692339S3 | "PCDHGA6,Prs2956376 S8    | ZC3H3     | 1.67E-05 | 1           | 0.00713881  | 8.86E-14 | 3.61E-06 | 5.91E-10 |
| phe.Fasting_irs141692339S3 | "PCDHGA6,Prs2980270 S7    | ZC3H3     | 1.67E-05 | 1           | 0.00713881  | 8.86E-14 | 3.61E-06 | 5.91E-10 |
| phe.Fasting_irs141692339S3 | "PCDHGA6,Prs2980272 S7    | ZC3H3     | 1.84E-05 | 1           | 0.00775069  | 3.61E-13 | 1.47E-05 | 1.95E-09 |
| phe.Fasting_irs141692339S3 | "PCDHGA6,Prs2980275 S5    | ZC3H3     | 1.67E-05 | 1           | 0.00713881  | 1.05E-13 | 4.28E-06 | 6.67E-10 |
| phe.Fasting_irs141692339S3 | "PCDHGA6,Prs352346 S3     | GRPEL2    | 2.75E-07 | 1           | 0.000191302 | 4.98E-06 | 1.00E+00 | 4.56E-03 |
| phe.Fasting_irs141692339S3 | "PCDHGA6,Prs57503635 S3   | NA        | 9.72E-08 | 1           | 7.43E-05    | 1.66E-14 | 6.76E-07 | 1.39E-10 |
| phe.Fasting_irs141692339S3 | "PCDHGA6,Prs60011869 S16  | NA        | 1.76E-06 | 1           | 0.00100002  | 4.59E-10 | 1.87E-02 | 1.20E-06 |
| phe.Fasting_irs141692339S3 | "PCDHGA6,Prs7004597 S8    | NA        | 9.79E-16 | 4.00E-08    | 2.91E-12    | 4.47E-06 | 1.00E+00 | 4.16E-03 |
| phe.Fasting_irs141692339S3 | "PCDHGA6,Prs7256517 S7    | CYTH2     | 1.70E-16 | 6.96E-09    | 6.09E-13    | 4.13E-10 | 1.68E-02 | 1.08E-06 |
| phe.Fasting_irs141692339S3 | "PCDHGA6,Prs73392640 S8   | POLR3B    | 3.60E-11 | 0.00147084  | 5.01E-08    | 5.89E-10 | 2.40E-02 | 1.49E-06 |
| phe.Fasting_irs141692339S3 | "PCDHGA6,Prs74627895 S8   | TMEM64    | 1.78E-05 | 1           | 0.00753355  | 1.78E-07 | 1.00E+00 | 2.39E-04 |
| phe.Fasting_irs141692339S3 | "PCDHGA6,Prs74701059 S24  | C17orf102 | 2.21E-05 | 1           | 0.00907468  | 3.08E-12 | 1.25E-04 | 1.31E-08 |
| phe.Fasting_irs141692339S3 | "PCDHGA6,Prs74914207 S24  | NA        | 1.52E-11 | 0.000622698 | 2.34E-08    | 2.21E-07 | 1.00E+00 | 2.89E-04 |
| phe.Fasting_irs141692339S3 | "PCDHGA6,Prs75350765 S5   | RCL1      | 1.72E-17 | 7.04E-10    | 1.28E-13    | 1.93E-08 | 7.87E-01 | 3.33E-05 |
| phe.Fasting_irs141692339S3 | "PCDHGA6,Prs75374128 S5   | CNTLN     | 1.74E-17 | 7.09E-10    | 1.29E-13    | 2.83E-06 | 1.00E+00 | 2.78E-03 |
| phe.Fasting_irs141692339S3 | "PCDHGA6,Prs75506779 S5   | TMCO3     | 8.05E-08 | 1           | 6.26E-05    | 5.98E-09 | 2.44E-01 | 1.16E-05 |

|                           |                      |                |           |           |             |             |            |          |          |
|---------------------------|----------------------|----------------|-----------|-----------|-------------|-------------|------------|----------|----------|
| phe.Fasting_rs141692339S3 | "PCDHGA6,Prs75758702 | S24            | NA        | 9.69E-18  | 3.96E-10    | 9.48E-14    | 9.65E-10   | 3.93E-02 | 2.29E-06 |
| phe.Fasting_rs141692339S3 | "PCDHGA6,Prs75864203 | S8             | CNTLN     | 1.74E-17  | 7.09E-10    | 1.29E-13    | 2.83E-06   | 1.00E+00 | 2.78E-03 |
| phe.Fasting_rs141692339S3 | "PCDHGA6,Prs76844308 | S8             | CNTLN     | 9.27E-18  | 3.78E-10    | 9.26E-14    | 2.49E-06   | 1.00E+00 | 2.49E-03 |
| phe.Fasting_rs141692339S3 | "PCDHGA6,Prs7763107  | S8             | FARS2     | 3.11E-08  | 1           | 2.66E-05    | 4.51E-10   | 1.83E-02 | 1.18E-06 |
| phe.Fasting_rs141692339S3 | "PCDHGA6,Prs77798597 | S7             | KPNA3     | 4.75E-16  | 1.94E-08    | 1.51E-12    | 5.58E-14   | 2.27E-06 | 3.84E-10 |
| phe.Fasting_rs141692339S3 | "PCDHGA6,Prs77845645 | S21            | NA        | 2.63E-07  | 1           | 0.000183695 | 3.92E-11   | 1.59E-03 | 1.29E-07 |
| phe.Fasting_rs141692339S3 | "PCDHGA6,Prs78353402 | S8             | AP3M2     | 9.79E-16  | 4.00E-08    | 2.91E-12    | 7.51E-06   | 1.00E+00 | 6.42E-03 |
| phe.Fasting_rs141692339S3 | "PCDHGA6,Prs78516788 | S8             | SLC38A1   | 4.20E-12  | 0.000171668 | 7.55E-09    | 1.06E-08   | 4.31E-01 | 1.95E-05 |
| phe.Fasting_rs141692339S3 | "PCDHGA6,Prs78697063 | S5             | MSI2      | 5.78E-20  | 2.36E-12    | 2.23E-14    | 3.66E-10   | 1.49E-02 | 9.68E-07 |
| phe.Fasting_rs141692339S3 | "PCDHGA6,Prs78722272 | S5             | CNTLN     | 1.74E-17  | 7.09E-10    | 1.29E-13    | 2.93E-06   | 1.00E+00 | 2.87E-03 |
| phe.Fasting_rs141692339S3 | "PCDHGA6,Prs78736524 | S5             | KPNA3     | 4.75E-16  | 1.94E-08    | 1.51E-12    | 6.03E-14   | 2.46E-06 | 4.09E-10 |
| phe.Fasting_rs141692339S3 | "PCDHGA6,Prs79703349 | S24            | C17orf102 | 2.21E-05  | 1           | 0.00907468  | 3.84E-12   | 1.56E-04 | 1.59E-08 |
| phe.Fasting_rs141692339S3 | "PCDHGA6,Prs79781495 | S8             | KPNA3     | 4.75E-16  | 1.94E-08    | 1.51E-12    | 5.58E-14   | 2.27E-06 | 3.84E-10 |
| phe.Fasting_rs141692339S3 | "PCDHGA6,Prs79886603 | S15            | NA        | 1.32E-08  | 0.540851    | 1.21E-05    | 1.22E-05   | 1.00E+00 | 9.54E-03 |
| phe.Fasting_rs141692339S3 | "PCDHGA6,Prs80200953 | S8             | PPP2R5D   | 1.67E-08  | 0.681117    | 1.49E-05    | 4.49E-06   | 1.00E+00 | 4.17E-03 |
| phe.Fasting_rs141692339S3 | "PCDHGA6,Prs80332465 | S5             | KPNA3     | 5.06E-16  | 2.07E-08    | 1.59E-12    | 6.03E-14   | 2.45E-06 | 4.09E-10 |
| phe.Fasting_rs141692339S3 | "PCDHGA6,Prs80334773 | S5             | KPNA3     | 5.06E-16  | 2.07E-08    | 1.59E-12    | 6.03E-14   | 2.45E-06 | 4.09E-10 |
| phe.Fasting_rs1417804     | IFI16                | rs140524622S7  | MRPL10    | 5.85E-06  | 1           | 0.002861    | 1.30E-06   | 1.00E+00 | 1.43E-03 |
| phe.Fasting_rs141926074S8 | ATE1                 | rs112924584S7  | PPME1     | 7.10E-06  | 1           | 0.0033964   | 5.93E-06   | 1.00E+00 | 5.27E-03 |
| phe.Fasting_rs141926074S8 | ATE1                 | rs115305957S23 | NA        | 5.19E-18  | 2.12E-10    | 6.91E-14    | 1.53E-06   | 1.00E+00 | 1.65E-03 |
| phe.Fasting_rs141926074S8 | ATE1                 | rs115787552S5  | KPNA3     | 1.30E-16  | 5.31E-09    | 5.25E-13    | 2.22E-15   | 9.04E-08 | 2.24E-11 |
| phe.Fasting_rs141926074S8 | ATE1                 | rs115888477S8  | NA        | 9.78E-16  | 3.99E-08    | 2.91E-12    | 3.77E-15   | 1.53E-07 | 3.57E-11 |
| phe.Fasting_rs141926074S8 | ATE1                 | rs116079984S8  | KPNA3     | 1.30E-16  | 5.31E-09    | 5.25E-13    | 3.91E-15   | 1.59E-07 | 3.68E-11 |
| phe.Fasting_rs141926074S8 | ATE1                 | rs116548615S8  | TMEM45B   | 2.25E-05  | 1           | 0.00923407  | 1.44E-06   | 1.00E+00 | 1.56E-03 |
| phe.Fasting_rs141926074S8 | ATE1                 | rs140524622S7  | MRPL10    | 1.44E-17  | 5.90E-10    | 1.16E-13    | 2.55E-09   | 1.04E-01 | 5.48E-06 |
| phe.Fasting_rs141926074S8 | ATE1                 | rs146815317S5  | KPNA3     | 1.30E-16  | 5.31E-09    | 5.25E-13    | 2.22E-15   | 9.04E-08 | 2.24E-11 |
| phe.Fasting_rs141926074S8 | ATE1                 | rs150117838S8  | KPNA3     | 1.30E-16  | 5.31E-09    | 5.25E-13    | 3.55E-15   | 1.45E-07 | 3.39E-11 |
| phe.Fasting_rs141926074S8 | ATE1                 | rs17132837     | S8        | PPME1     | 7.35E-06    | 1           | 0.00349772 | 5.99E-06 | 1.00E+00 |
| phe.Fasting_rs141926074S8 | ATE1                 | rs17132870     | S7        | PPME1     | 7.35E-06    | 1           | 0.00349772 | 5.99E-06 | 1.00E+00 |
| phe.Fasting_rs141926074S8 | ATE1                 | rs56142225     | S8        | PPME1     | 7.88E-06    | 1           | 0.00371633 | 9.63E-07 | 1.00E+00 |
| phe.Fasting_rs141926074S8 | ATE1                 | rs56398234     | S8        | LRCH1     | 1.51E-10    | 0.00616305  | 1.89E-07   | 2.34E-07 | 1.00E+00 |
| phe.Fasting_rs141926074S8 | ATE1                 | rs57503635     | S3        | NA        | 3.36E-17    | 1.37E-09    | 1.87E-13   | 4.46E-15 | 1.81E-07 |
| phe.Fasting_rs141926074S8 | ATE1                 | rs7256517      | S7        | CYTH2     | 4.52E-17    | 1.85E-09    | 2.30E-13   | 4.92E-09 | 2.00E-01 |
| phe.Fasting_rs141926074S8 | ATE1                 | rs73619637     | S8        | NA        | 2.46E-06    | 1           | 0.00133571 | 3.93E-08 | 1.00E+00 |
| phe.Fasting_rs141926074S8 | ATE1                 | rs74701059     | S24       | C17orf102 | 5.09E-18    | 2.08E-10    | 6.90E-14   | 2.41E-06 | 1.00E+00 |
| phe.Fasting_rs141926074S8 | ATE1                 | rs74914207     | S24       | NA        | 1.21E-17    | 4.92E-10    | 1.05E-13   | 2.93E-15 | 1.19E-07 |
| phe.Fasting_rs141926074S8 | ATE1                 | rs77798597     | S7        | KPNA3     | 1.30E-16    | 5.31E-09    | 5.25E-13   | 3.55E-15 | 1.45E-07 |
| phe.Fasting_rs141926074S8 | ATE1                 | rs78516788     | S8        | SLC38A1   | 4.52E-18    | 1.85E-10    | 6.42E-14   | 1.50E-12 | 6.10E-05 |
| phe.Fasting_rs141926074S8 | ATE1                 | rs78736524     | S5        | KPNA3     | 1.30E-16    | 5.31E-09    | 5.25E-13   | 2.22E-15 | 9.04E-08 |
| phe.Fasting_rs141926074S8 | ATE1                 | rs7925695      | S7        | PPME1     | 7.35E-06    | 1           | 0.00349772 | 5.99E-06 | 1.00E+00 |



|                            |        |                 |           |          |            |             |          |          |          |
|----------------------------|--------|-----------------|-----------|----------|------------|-------------|----------|----------|----------|
| phe.Fasting_rs141926074 S8 | ATE1   | rs79703349 S24  | C17orf102 | 5.09E-18 | 2.08E-10   | 6.90E-14    | 2.85E-06 | 1.00E+00 | 2.80E-03 |
| phe.Fasting_rs141926074 S8 | ATE1   | rs79781495 S8   | KPNA3     | 1.30E-16 | 5.31E-09   | 5.25E-13    | 3.55E-15 | 1.45E-07 | 3.39E-11 |
| phe.Fasting_rs141926074 S8 | ATE1   | rs79886603 S15  | NA        | 3.97E-18 | 1.62E-10   | 5.99E-14    | 3.44E-06 | 1.00E+00 | 3.30E-03 |
| phe.Fasting_rs141926074 S8 | ATE1   | rs80332465 S5   | KPNA3     | 1.39E-16 | 5.69E-09   | 5.53E-13    | 3.20E-15 | 1.30E-07 | 3.07E-11 |
| phe.Fasting_rs141926074 S8 | ATE1   | rs80334773 S5   | KPNA3     | 1.39E-16 | 5.69E-09   | 5.53E-13    | 3.20E-15 | 1.30E-07 | 3.07E-11 |
| phe.Fasting_rs141926074 S8 | ATE1   | rs8075478 S8    | MYH10     | 1.79E-18 | 7.31E-11   | 3.84E-14    | 1.03E-09 | 4.20E-02 | 2.45E-06 |
| phe.Fasting_rs142480565 S8 | DIAPH1 | rs111576333 S5  | TMEM64    | 2.37E-06 | 1          | 0.00129547  | 5.87E-14 | 2.39E-06 | 3.99E-10 |
| phe.Fasting_rs142480565 S8 | DIAPH1 | rs112089881 S8  | ZFAND4    | 2.04E-17 | 8.32E-10   | 1.43E-13    | 1.09E-09 | 4.45E-02 | 2.58E-06 |
| phe.Fasting_rs142480565 S8 | DIAPH1 | rs112091318 S5  | TMEM64    | 7.32E-07 | 1          | 0.000459899 | 3.91E-08 | 1.00E+00 | 6.13E-05 |
| phe.Fasting_rs142480565 S8 | DIAPH1 | rs114334325 S7  | AP3M2     | 4.51E-15 | 1.84E-07   | 1.18E-11    | 3.87E-07 | 1.00E+00 | 4.75E-04 |
| phe.Fasting_rs142480565 S8 | DIAPH1 | rs114394395 S7  | AP3M2     | 4.81E-15 | 1.97E-07   | 1.25E-11    | 3.87E-07 | 1.00E+00 | 4.75E-04 |
| phe.Fasting_rs142480565 S8 | DIAPH1 | rs114565620 S8  | RCL1      | 1.82E-16 | 7.42E-09   | 6.37E-13    | 3.70E-08 | 1.00E+00 | 5.84E-05 |
| phe.Fasting_rs142480565 S8 | DIAPH1 | rs115083290 S19 | NA        | 4.38E-16 | 1.79E-08   | 1.40E-12    | 1.42E-08 | 5.77E-01 | 2.53E-05 |
| phe.Fasting_rs142480565 S8 | DIAPH1 | rs11524145 S5   | CDK6      | 7.80E-07 | 1          | 0.000486356 | 7.89E-06 | 1.00E+00 | 6.69E-03 |
| phe.Fasting_rs142480565 S8 | DIAPH1 | rs115752779 S19 | NA        | 4.38E-16 | 1.79E-08   | 1.40E-12    | 1.42E-08 | 5.77E-01 | 2.53E-05 |
| phe.Fasting_rs142480565 S8 | DIAPH1 | rs115787552 S5  | KPNA3     | 2.97E-15 | 1.21E-07   | 8.14E-12    | 1.18E-13 | 4.80E-06 | 7.06E-10 |
| phe.Fasting_rs142480565 S8 | DIAPH1 | rs115888477 S8  | NA        | 2.03E-14 | 8.28E-07   | 5.02E-11    | 2.21E-14 | 8.99E-07 | 1.73E-10 |
| phe.Fasting_rs142480565 S8 | DIAPH1 | rs116011837 S9  | BRD2      | 4.89E-11 | 2.00E-03   | 6.62E-08    | 4.07E-14 | 1.66E-06 | 2.85E-10 |
| phe.Fasting_rs142480565 S8 | DIAPH1 | rs116079984 S8  | KPNA3     | 2.97E-15 | 1.21E-07   | 8.14E-12    | 1.24E-13 | 5.04E-06 | 7.34E-10 |
| phe.Fasting_rs142480565 S8 | DIAPH1 | rs116120727 S9  | BRD2      | 4.89E-11 | 2.00E-03   | 6.62E-08    | 4.07E-14 | 1.66E-06 | 2.85E-10 |
| phe.Fasting_rs142480565 S8 | DIAPH1 | rs116406581 S2  | NA        | 1.81E-14 | 7.39E-07   | 4.52E-11    | 2.35E-07 | 1.00E+00 | 3.05E-04 |
| phe.Fasting_rs142480565 S8 | DIAPH1 | rs116548615 S8  | TMEM45B   | 1.73E-16 | 7.06E-09   | 6.15E-13    | 8.70E-12 | 3.54E-04 | 3.26E-08 |
| phe.Fasting_rs142480565 S8 | DIAPH1 | rs116696844 S3  | AP3M2     | 6.92E-15 | 2.83E-07   | 1.78E-11    | 3.87E-07 | 1.00E+00 | 4.75E-04 |
| phe.Fasting_rs142480565 S8 | DIAPH1 | rs11989304 S4   | TMEM64    | 2.37E-06 | 1.00E+00   | 1.30E-03    | 6.78E-11 | 2.76E-03 | 2.13E-07 |
| phe.Fasting_rs142480565 S8 | DIAPH1 | rs140524622 S7  | MRPL10    | 1.08E-16 | 4.41E-09   | 4.54E-13    | 7.35E-06 | 1.00E+00 | 6.31E-03 |
| phe.Fasting_rs142480565 S8 | DIAPH1 | rs146815317 S5  | KPNA3     | 2.97E-15 | 1.21E-07   | 8.14E-12    | 1.18E-13 | 4.80E-06 | 7.06E-10 |
| phe.Fasting_rs142480565 S8 | DIAPH1 | rs150117838 S8  | KPNA3     | 2.97E-15 | 1.21E-07   | 8.14E-12    | 1.09E-13 | 4.44E-06 | 6.79E-10 |
| phe.Fasting_rs142480565 S8 | DIAPH1 | rs150916187 S4  | HIST1H2BK | 1.38E-05 | 1.00E+00   | 6.05E-03    | 1.37E-14 | 5.59E-07 | 1.16E-10 |
| phe.Fasting_rs142480565 S8 | DIAPH1 | rs16894241 S4   | HIST1H2BK | 1.99E-11 | 8.12E-04   | 2.96E-08    | 3.44E-14 | 1.40E-06 | 2.50E-10 |
| phe.Fasting_rs142480565 S8 | DIAPH1 | rs2032062 S8    | NA        | 1.22E-14 | 4.98E-07   | 3.09E-11    | 8.48E-06 | 1.00E+00 | 7.14E-03 |
| phe.Fasting_rs142480565 S8 | DIAPH1 | rs2153597 S8    | ZNF438    | 5.51E-11 | 0.00224928 | 7.42E-08    | 4.52E-09 | 1.84E-01 | 9.08E-06 |
| phe.Fasting_rs142480565 S8 | DIAPH1 | rs2835656 S7    | TTC3      | 3.01E-10 | 0.0122766  | 3.60E-07    | 9.12E-06 | 1.00E+00 | 7.57E-03 |
| phe.Fasting_rs142480565 S8 | DIAPH1 | rs34801978 S3   | HOXB2     | 1.23E-05 | 1          | 5.46E-03    | 1.03E-08 | 4.19E-01 | 1.90E-05 |
| phe.Fasting_rs142480565 S8 | DIAPH1 | rs352346 S3     | GRPEL2    | 1.85E-11 | 7.55E-04   | 2.78E-08    | 8.42E-06 | 1.00E+00 | 7.10E-03 |
| phe.Fasting_rs142480565 S8 | DIAPH1 | rs3750898 S8    | DCLRE1A   | 2.29E-05 | 1.00E+00   | 9.35E-03    | 8.76E-06 | 1.00E+00 | 7.32E-03 |
| phe.Fasting_rs142480565 S8 | DIAPH1 | rs4732511 S13   | POR       | 2.30E-15 | 9.39E-08   | 6.48E-12    | 9.65E-06 | 1.00E+00 | 7.93E-03 |
| phe.Fasting_rs142480565 S8 | DIAPH1 | rs57503635 S3   | NA        | 6.34E-16 | 2.59E-08   | 1.95E-12    | 3.17E-14 | 1.29E-06 | 2.34E-10 |
| phe.Fasting_rs142480565 S8 | DIAPH1 | rs58905476 S7   | TTC3      | 3.29E-10 | 0.0134302  | 3.90E-07    | 9.79E-06 | 1.00E+00 | 8.01E-03 |
| phe.Fasting_rs142480565 S8 | DIAPH1 | rs60011869 S16  | NA        | 1.04E-05 | 1          | 4.72E-03    | 8.16E-10 | 3.32E-02 | 1.98E-06 |
| phe.Fasting_rs142480565 S8 | DIAPH1 | rs6964407 S7    | POR       | 7.55E-15 | 3.08E-07   | 1.94E-11    | 8.91E-06 | 1.00E+00 | 7.43E-03 |

|              |             |    |             |             |     |            |          |          |          |          |          |          |
|--------------|-------------|----|-------------|-------------|-----|------------|----------|----------|----------|----------|----------|----------|
| phe.Fasting_ | rs142480565 | S8 | DIAPH1      | rs7004597   | S8  | NA         | 4.51E-15 | 1.84E-07 | 1.18E-11 | 2.34E-07 | 1.00E+00 | 3.04E-04 |
| phe.Fasting_ | rs142480565 | S8 | DIAPH1      | rs7256517   | S7  | CYTH2      | 1.04E-15 | 4.24E-08 | 3.06E-12 | 4.82E-12 | 1.96E-04 | 1.91E-08 |
| phe.Fasting_ | rs142480565 | S8 | DIAPH1      | rs73283603  | S7  | ZWINT      | 1.90E-06 | 1.00E+00 | 1.07E-03 | 2.03E-07 | 1.00E+00 | 2.68E-04 |
| phe.Fasting_ | rs142480565 | S8 | DIAPH1      | rs73392640  | S8  | POLR3B     | 2.02E-10 | 8.26E-03 | 2.49E-07 | 5.19E-11 | 2.11E-03 | 1.67E-07 |
| phe.Fasting_ | rs142480565 | S8 | DIAPH1      | rs734069    | S19 | NA         | 2.06E-08 | 8.39E-01 | 1.81E-05 | 6.71E-10 | 2.73E-02 | 1.68E-06 |
| phe.Fasting_ | rs142480565 | S8 | DIAPH1      | rs73619637  | S8  | NA         | 1.44E-15 | 5.89E-08 | 4.14E-12 | 2.05E-10 | 8.34E-03 | 5.78E-07 |
| phe.Fasting_ | rs142480565 | S8 | DIAPH1      | rs74627895  | S8  | TMEM64     | 7.32E-07 | 1.00E+00 | 4.60E-04 | 2.03E-08 | 8.28E-01 | 3.48E-05 |
| phe.Fasting_ | rs142480565 | S8 | DIAPH1      | rs74914207  | S24 | NA         | 1.37E-10 | 5.59E-03 | 1.73E-07 | 9.12E-11 | 3.71E-03 | 2.80E-07 |
| phe.Fasting_ | rs142480565 | S8 | DIAPH1      | rs75350765  | S5  | RCL1       | 1.82E-16 | 7.42E-09 | 6.37E-13 | 3.70E-08 | 1.00E+00 | 5.84E-05 |
| phe.Fasting_ | rs142480565 | S8 | DIAPH1      | rs75374128  | S5  | CNTLN      | 1.47E-16 | 6.01E-09 | 5.72E-13 | 1.01E-07 | 1.00E+00 | 1.42E-04 |
| phe.Fasting_ | rs142480565 | S8 | DIAPH1      | rs75506779  | S5  | TMCO3      | 5.55E-07 | 1.00E+00 | 3.61E-04 | 1.10E-08 | 4.50E-01 | 2.03E-05 |
| phe.Fasting_ | rs142480565 | S8 | DIAPH1      | rs75758702  | S24 | NA         | 7.02E-17 | 2.87E-09 | 3.16E-13 | 1.57E-10 | 6.38E-03 | 4.59E-07 |
| phe.Fasting_ | rs142480565 | S8 | DIAPH1      | rs75864203  | S8  | CNTLN      | 1.47E-16 | 6.01E-09 | 5.72E-13 | 1.01E-07 | 1.00E+00 | 1.42E-04 |
| phe.Fasting_ | rs142480565 | S8 | DIAPH1      | rs75949566  | S5  | TMEM64     | 2.76E-06 | 1.00E+00 | 1.47E-03 | 8.48E-11 | 3.45E-03 | 2.62E-07 |
| phe.Fasting_ | rs142480565 | S8 | DIAPH1      | rs76844308  | S8  | CNTLN      | 7.68E-17 | 3.14E-09 | 3.41E-13 | 9.52E-08 | 1.00E+00 | 1.35E-04 |
| phe.Fasting_ | rs142480565 | S8 | DIAPH1      | rs7763107   | S8  | FARS2      | 5.78E-16 | 2.36E-08 | 1.79E-12 | 9.23E-12 | 3.76E-04 | 3.44E-08 |
| phe.Fasting_ | rs142480565 | S8 | DIAPH1      | rs77798597  | S7  | KPNA3      | 2.97E-15 | 1.21E-07 | 8.14E-12 | 1.09E-13 | 4.44E-06 | 6.79E-10 |
| phe.Fasting_ | rs142480565 | S8 | DIAPH1      | rs77845645  | S21 | NA         | 1.53E-06 | 1.00E+00 | 8.88E-04 | 4.20E-11 | 1.71E-03 | 1.38E-07 |
| phe.Fasting_ | rs142480565 | S8 | DIAPH1      | rs78353402  | S8  | AP3M2      | 4.51E-15 | 1.84E-07 | 1.18E-11 | 3.87E-07 | 1.00E+00 | 4.75E-04 |
| phe.Fasting_ | rs142480565 | S8 | DIAPH1      | rs78516788  | S8  | SLC38A1    | 2.75E-11 | 1.12E-03 | 3.94E-08 | 2.44E-10 | 9.93E-03 | 6.74E-07 |
| phe.Fasting_ | rs142480565 | S8 | DIAPH1      | rs78697063  | S5  | MSI2       | 8.23E-19 | 3.36E-11 | 2.70E-14 | 6.84E-10 | 2.78E-02 | 1.70E-06 |
| phe.Fasting_ | rs142480565 | S8 | DIAPH1      | rs78722272  | S5  | CNTLN      | 1.47E-16 | 6.01E-09 | 5.72E-13 | 1.05E-07 | 1.00E+00 | 1.48E-04 |
| phe.Fasting_ | rs142480565 | S8 | DIAPH1      | rs78736524  | S5  | KPNA3      | 2.97E-15 | 1.21E-07 | 8.14E-12 | 1.18E-13 | 4.80E-06 | 7.06E-10 |
| phe.Fasting_ | rs142480565 | S8 | DIAPH1      | rs78990344  | S2  | LOC1005063 | 2.37E-06 | 1.00E+00 | 1.30E-03 | 6.78E-11 | 2.76E-03 | 2.13E-07 |
| phe.Fasting_ | rs142480565 | S8 | DIAPH1      | rs79781495  | S8  | KPNA3      | 2.97E-15 | 1.21E-07 | 8.14E-12 | 1.09E-13 | 4.44E-06 | 6.79E-10 |
| phe.Fasting_ | rs142480565 | S8 | DIAPH1      | rs79886603  | S15 | NA         | 8.71E-08 | 1.00E+00 | 6.74E-05 | 4.66E-07 | 1.00E+00 | 5.59E-04 |
| phe.Fasting_ | rs142480565 | S8 | DIAPH1      | rs80200953  | S8  | PPP2R5D    | 8.49E-17 | 3.47E-09 | 3.69E-13 | 3.65E-09 | 1.48E-01 | 7.55E-06 |
| phe.Fasting_ | rs142480565 | S8 | DIAPH1      | rs80332465  | S5  | KPNA3      | 3.13E-15 | 1.28E-07 | 8.51E-12 | 1.17E-13 | 4.77E-06 | 7.06E-10 |
| phe.Fasting_ | rs142480565 | S8 | DIAPH1      | rs80334773  | S5  | KPNA3      | 3.13E-15 | 1.28E-07 | 8.51E-12 | 1.17E-13 | 4.77E-06 | 7.06E-10 |
| phe.Fasting_ | rs142718558 | S7 | "DIAPH1,LOC | rs111576333 | S5  | TMEM64     | 2.37E-06 | 1.00E+00 | 1.30E-03 | 5.87E-14 | 2.39E-06 | 3.99E-10 |
| phe.Fasting_ | rs142718558 | S7 | "DIAPH1,LOC | rs112089881 | S8  | ZFAND4     | 2.04E-17 | 8.32E-10 | 1.43E-13 | 1.09E-09 | 4.45E-02 | 2.58E-06 |
| phe.Fasting_ | rs142718558 | S7 | "DIAPH1,LOC | rs112091318 | S5  | TMEM64     | 7.32E-07 | 1.00E+00 | 4.60E-04 | 3.91E-08 | 1.00E+00 | 6.13E-05 |
| phe.Fasting_ | rs142718558 | S7 | "DIAPH1,LOC | rs114334325 | S7  | AP3M2      | 4.51E-15 | 1.84E-07 | 1.18E-11 | 3.87E-07 | 1.00E+00 | 4.75E-04 |
| phe.Fasting_ | rs142718558 | S7 | "DIAPH1,LOC | rs114394395 | S7  | AP3M2      | 4.81E-15 | 1.97E-07 | 1.25E-11 | 3.87E-07 | 1.00E+00 | 4.75E-04 |
| phe.Fasting_ | rs142718558 | S7 | "DIAPH1,LOC | rs114565620 | S8  | RCL1       | 1.82E-16 | 7.42E-09 | 6.37E-13 | 3.70E-08 | 1.00E+00 | 5.84E-05 |
| phe.Fasting_ | rs142718558 | S7 | "DIAPH1,LOC | rs115083290 | S19 | NA         | 4.38E-16 | 1.79E-08 | 1.40E-12 | 1.42E-08 | 5.77E-01 | 2.53E-05 |
| phe.Fasting_ | rs142718558 | S7 | "DIAPH1,LOC | rs11524145  | S5  | CDK6       | 7.80E-07 | 1.00E+00 | 4.86E-04 | 7.89E-06 | 1.00E+00 | 6.69E-03 |
| phe.Fasting_ | rs142718558 | S7 | "DIAPH1,LOC | rs115752779 | S19 | NA         | 4.38E-16 | 1.79E-08 | 1.40E-12 | 1.42E-08 | 5.77E-01 | 2.53E-05 |
| phe.Fasting_ | rs142718558 | S7 | "DIAPH1,LOC | rs115787552 | S5  | KPNA3      | 2.97E-15 | 1.21E-07 | 8.14E-12 | 1.18E-13 | 4.80E-06 | 7.06E-10 |
| phe.Fasting_ | rs142718558 | S7 | "DIAPH1,LOC | rs115888477 | S8  | NA         | 2.03E-14 | 8.28E-07 | 5.02E-11 | 2.21E-14 | 8.99E-07 | 1.73E-10 |

|              |             |    |                        |     |           |          |          |            |          |          |          |
|--------------|-------------|----|------------------------|-----|-----------|----------|----------|------------|----------|----------|----------|
| phe.Fasting_ | rs142718558 | S7 | "DIAPH1,LOCrs116011837 | S9  | BRD2      | 4.89E-11 | 2.00E-03 | 6.62E-08   | 4.07E-14 | 1.66E-06 | 2.85E-10 |
| phe.Fasting_ | rs142718558 | S7 | "DIAPH1,LOCrs116079984 | S8  | KPNA3     | 2.97E-15 | 1.21E-07 | 8.14E-12   | 1.24E-13 | 5.04E-06 | 7.34E-10 |
| phe.Fasting_ | rs142718558 | S7 | "DIAPH1,LOCrs116120727 | S9  | BRD2      | 4.89E-11 | 2.00E-03 | 6.62E-08   | 4.07E-14 | 1.66E-06 | 2.85E-10 |
| phe.Fasting_ | rs142718558 | S7 | "DIAPH1,LOCrs116406581 | S2  | NA        | 1.81E-14 | 7.39E-07 | 4.52E-11   | 2.35E-07 | 1.00E+00 | 3.05E-04 |
| phe.Fasting_ | rs142718558 | S7 | "DIAPH1,LOCrs116548615 | S8  | TMEM45B   | 1.73E-16 | 7.06E-09 | 6.15E-13   | 8.70E-12 | 3.54E-04 | 3.26E-08 |
| phe.Fasting_ | rs142718558 | S7 | "DIAPH1,LOCrs116696844 | S3  | AP3M2     | 6.92E-15 | 2.83E-07 | 1.78E-11   | 3.87E-07 | 1.00E+00 | 4.75E-04 |
| phe.Fasting_ | rs142718558 | S7 | "DIAPH1,LOCrs11989304  | S4  | TMEM64    | 2.37E-06 | 1.00E+00 | 1.30E-03   | 6.78E-11 | 2.76E-03 | 2.13E-07 |
| phe.Fasting_ | rs142718558 | S7 | "DIAPH1,LOCrs140524622 | S7  | MRPL10    | 1.08E-16 | 4.41E-09 | 4.54E-13   | 7.35E-06 | 1.00E+00 | 6.31E-03 |
| phe.Fasting_ | rs142718558 | S7 | "DIAPH1,LOCrs146815317 | S5  | KPNA3     | 2.97E-15 | 1.21E-07 | 8.14E-12   | 1.18E-13 | 4.80E-06 | 7.06E-10 |
| phe.Fasting_ | rs142718558 | S7 | "DIAPH1,LOCrs150117838 | S8  | KPNA3     | 2.97E-15 | 1.21E-07 | 8.14E-12   | 1.09E-13 | 4.44E-06 | 6.79E-10 |
| phe.Fasting_ | rs142718558 | S7 | "DIAPH1,LOCrs150916187 | S4  | HIST1H2BK | 1.38E-05 | 1        | 0.00605332 | 1.37E-14 | 5.59E-07 | 1.16E-10 |
| phe.Fasting_ | rs142718558 | S7 | "DIAPH1,LOCrs16894241  | S4  | HIST1H2BK | 1.99E-11 | 8.12E-04 | 2.96E-08   | 3.44E-14 | 1.40E-06 | 2.50E-10 |
| phe.Fasting_ | rs142718558 | S7 | "DIAPH1,LOCrs2032062   | S8  | NA        | 1.22E-14 | 4.98E-07 | 3.09E-11   | 8.48E-06 | 1.00E+00 | 7.14E-03 |
| phe.Fasting_ | rs142718558 | S7 | "DIAPH1,LOCrs2153597   | S8  | ZNF438    | 5.51E-11 | 2.25E-03 | 7.42E-08   | 4.52E-09 | 1.84E-01 | 9.08E-06 |
| phe.Fasting_ | rs142718558 | S7 | "DIAPH1,LOCrs2835656   | S7  | TTC3      | 3.01E-10 | 1.23E-02 | 3.60E-07   | 9.12E-06 | 1.00E+00 | 7.57E-03 |
| phe.Fasting_ | rs142718558 | S7 | "DIAPH1,LOCrs34801978  | S3  | HOXB2     | 1.23E-05 | 1.00E+00 | 5.46E-03   | 1.03E-08 | 4.19E-01 | 1.90E-05 |
| phe.Fasting_ | rs142718558 | S7 | "DIAPH1,LOCrs352346    | S3  | GRPEL2    | 1.85E-11 | 7.55E-04 | 2.78E-08   | 8.42E-06 | 1.00E+00 | 7.10E-03 |
| phe.Fasting_ | rs142718558 | S7 | "DIAPH1,LOCrs3750898   | S8  | DCLRE1A   | 2.29E-05 | 1        | 0.0093502  | 8.76E-06 | 1.00E+00 | 7.32E-03 |
| phe.Fasting_ | rs142718558 | S7 | "DIAPH1,LOCrs4732511   | S13 | POR       | 2.30E-15 | 9.39E-08 | 6.48E-12   | 9.65E-06 | 1.00E+00 | 7.93E-03 |
| phe.Fasting_ | rs142718558 | S7 | "DIAPH1,LOCrs57503635  | S3  | NA        | 6.34E-16 | 2.59E-08 | 1.95E-12   | 3.17E-14 | 1.29E-06 | 2.34E-10 |
| phe.Fasting_ | rs142718558 | S7 | "DIAPH1,LOCrs58905476  | S7  | TTC3      | 3.29E-10 | 1.34E-02 | 3.90E-07   | 7.97E-06 | 1.00E+00 | 8.01E-03 |
| phe.Fasting_ | rs142718558 | S7 | "DIAPH1,LOCrs60011869  | S16 | NA        | 1.04E-05 | 1.00E+00 | 4.72E-03   | 8.16E-10 | 3.32E-02 | 1.98E-06 |
| phe.Fasting_ | rs142718558 | S7 | "DIAPH1,LOCrs6964407   | S7  | POR       | 7.55E-15 | 3.08E-07 | 1.94E-11   | 8.91E-06 | 1.00E+00 | 7.43E-03 |
| phe.Fasting_ | rs142718558 | S7 | "DIAPH1,LOCrs7004597   | S8  | NA        | 4.51E-15 | 1.84E-07 | 1.18E-11   | 2.34E-07 | 1.00E+00 | 3.04E-04 |
| phe.Fasting_ | rs142718558 | S7 | "DIAPH1,LOCrs7256517   | S7  | CYTH2     | 1.04E-15 | 4.24E-08 | 3.06E-12   | 4.82E-12 | 1.96E-04 | 1.91E-08 |
| phe.Fasting_ | rs142718558 | S7 | "DIAPH1,LOCrs73283603  | S7  | ZWINT     | 1.90E-06 | 1.00E+00 | 1.07E-03   | 2.03E-07 | 1.00E+00 | 2.68E-04 |
| phe.Fasting_ | rs142718558 | S7 | "DIAPH1,LOCrs73392640  | S8  | POLR3B    | 2.02E-10 | 8.26E-03 | 2.49E-07   | 5.19E-11 | 2.11E-03 | 1.67E-07 |
| phe.Fasting_ | rs142718558 | S7 | "DIAPH1,LOCrs734069    | S19 | NA        | 2.06E-08 | 0.839421 | 1.81E-05   | 6.71E-10 | 2.73E-02 | 1.68E-06 |
| phe.Fasting_ | rs142718558 | S7 | "DIAPH1,LOCrs73619637  | S8  | NA        | 1.44E-15 | 5.89E-08 | 4.14E-12   | 2.05E-10 | 8.34E-03 | 5.78E-07 |
| phe.Fasting_ | rs142718558 | S7 | "DIAPH1,LOCrs74627895  | S8  | TMEM64    | 7.32E-07 | 1.00E+00 | 4.60E-04   | 2.03E-08 | 8.28E-01 | 3.48E-05 |
| phe.Fasting_ | rs142718558 | S7 | "DIAPH1,LOCrs74914207  | S24 | NA        | 1.37E-10 | 5.59E-03 | 1.73E-07   | 9.12E-11 | 3.71E-03 | 2.80E-07 |
| phe.Fasting_ | rs142718558 | S7 | "DIAPH1,LOCrs75350765  | S5  | RCL1      | 1.82E-16 | 7.42E-09 | 6.37E-13   | 3.70E-08 | 1.00E+00 | 5.84E-05 |
| phe.Fasting_ | rs142718558 | S7 | "DIAPH1,LOCrs75374128  | S5  | CNTLN     | 1.47E-16 | 6.01E-09 | 5.72E-13   | 1.01E-07 | 1.00E+00 | 1.42E-04 |
| phe.Fasting_ | rs142718558 | S7 | "DIAPH1,LOCrs75506779  | S5  | TMCO3     | 5.55E-07 | 1.00E+00 | 3.61E-04   | 1.10E-08 | 4.50E-01 | 2.03E-05 |
| phe.Fasting_ | rs142718558 | S7 | "DIAPH1,LOCrs75758702  | S24 | NA        | 7.02E-17 | 2.87E-09 | 3.16E-13   | 1.57E-10 | 6.38E-03 | 4.59E-07 |
| phe.Fasting_ | rs142718558 | S7 | "DIAPH1,LOCrs75864203  | S8  | CNTLN     | 1.47E-16 | 6.01E-09 | 5.72E-13   | 1.01E-07 | 1.00E+00 | 1.42E-04 |
| phe.Fasting_ | rs142718558 | S7 | "DIAPH1,LOCrs75949566  | S5  | TMEM64    | 2.76E-06 | 1.00E+00 | 1.47E-03   | 8.48E-11 | 3.45E-03 | 2.62E-07 |
| phe.Fasting_ | rs142718558 | S7 | "DIAPH1,LOCrs76844308  | S8  | CNTLN     | 7.68E-17 | 3.14E-09 | 3.41E-13   | 9.52E-08 | 1.00E+00 | 1.35E-04 |
| phe.Fasting_ | rs142718558 | S7 | "DIAPH1,LOCrs7763107   | S8  | FARS2     | 5.78E-16 | 2.36E-08 | 1.79E-12   | 9.23E-12 | 3.76E-04 | 3.44E-08 |
| phe.Fasting_ | rs142718558 | S7 | "DIAPH1,LOCrs77798597  | S7  | KPNA3     | 2.97E-15 | 1.21E-07 | 8.14E-12   | 1.09E-13 | 4.44E-06 | 6.79E-10 |

|              |             |    |                       |             |            |           |          |          |             |          |          |          |
|--------------|-------------|----|-----------------------|-------------|------------|-----------|----------|----------|-------------|----------|----------|----------|
| phe.Fasting_ | rs142718558 | S7 | "DIAPH1,LOCrs77845645 | S21         | NA         | 1.53E-06  | 1.00E+00 | 8.88E-04 | 4.20E-11    | 1.71E-03 | 1.38E-07 |          |
| phe.Fasting_ | rs142718558 | S7 | "DIAPH1,LOCrs78353402 | S8          | AP3M2      | 4.51E-15  | 1.84E-07 | 1.18E-11 | 3.87E-07    | 1.00E+00 | 4.75E-04 |          |
| phe.Fasting_ | rs142718558 | S7 | "DIAPH1,LOCrs78516788 | S8          | SLC38A1    | 2.75E-11  | 1.12E-03 | 3.94E-08 | 2.44E-10    | 9.93E-03 | 6.74E-07 |          |
| phe.Fasting_ | rs142718558 | S7 | "DIAPH1,LOCrs78697063 | S5          | MSI2       | 8.23E-19  | 3.36E-11 | 2.70E-14 | 6.84E-10    | 2.78E-02 | 1.70E-06 |          |
| phe.Fasting_ | rs142718558 | S7 | "DIAPH1,LOCrs78722272 | S5          | CNTLN      | 1.47E-16  | 6.01E-09 | 5.72E-13 | 1.05E-07    | 1.00E+00 | 1.48E-04 |          |
| phe.Fasting_ | rs142718558 | S7 | "DIAPH1,LOCrs78736524 | S5          | KPNA3      | 2.97E-15  | 1.21E-07 | 8.14E-12 | 1.18E-13    | 4.80E-06 | 7.06E-10 |          |
| phe.Fasting_ | rs142718558 | S7 | "DIAPH1,LOCrs78990344 | S2          | LOC1005063 | 2.37E-06  | 1.00E+00 | 1.30E-03 | 6.78E-11    | 2.76E-03 | 2.13E-07 |          |
| phe.Fasting_ | rs142718558 | S7 | "DIAPH1,LOCrs79781495 | S8          | KPNA3      | 2.97E-15  | 1.21E-07 | 8.14E-12 | 1.09E-13    | 4.44E-06 | 6.79E-10 |          |
| phe.Fasting_ | rs142718558 | S7 | "DIAPH1,LOCrs79886603 | S15         | NA         | 8.71E-08  | 1.00E+00 | 6.74E-05 | 4.66E-07    | 1.00E+00 | 5.59E-04 |          |
| phe.Fasting_ | rs142718558 | S7 | "DIAPH1,LOCrs80200953 | S8          | PPP2R5D    | 8.49E-17  | 3.47E-09 | 3.69E-13 | 3.65E-09    | 1.48E-01 | 7.55E-06 |          |
| phe.Fasting_ | rs142718558 | S7 | "DIAPH1,LOCrs80332465 | S5          | KPNA3      | 3.13E-15  | 1.28E-07 | 8.51E-12 | 1.17E-13    | 4.77E-06 | 7.06E-10 |          |
| phe.Fasting_ | rs142718558 | S7 | "DIAPH1,LOCrs80334773 | S5          | KPNA3      | 3.13E-15  | 1.28E-07 | 8.51E-12 | 1.17E-13    | 4.77E-06 | 7.06E-10 |          |
| phe.Fasting_ | rs142789100 | S8 | DIAPH1                | rs111576333 | S5         | TMEM64    | 5.56E-07 | 1        | 0.000361481 | 7.80E-15 | 3.17E-07 | 6.90E-11 |
| phe.Fasting_ | rs142789100 | S8 | DIAPH1                | rs112089881 | S8         | ZFAND4    | 3.24E-18 | 1.32E-10 | 5.45E-14    | 1.95E-10 | 7.96E-03 | 5.56E-07 |
| phe.Fasting_ | rs142789100 | S8 | DIAPH1                | rs112091318 | S5         | TMEM64    | 1.64E-07 | 1.00E+00 | 1.18E-04    | 9.13E-09 | 3.72E-01 | 1.72E-05 |
| phe.Fasting_ | rs142789100 | S8 | DIAPH1                | rs114334325 | S7         | AP3M2     | 1.25E-15 | 5.12E-08 | 3.65E-12    | 8.81E-08 | 1.00E+00 | 1.26E-04 |
| phe.Fasting_ | rs142789100 | S8 | DIAPH1                | rs114394395 | S7         | AP3M2     | 1.33E-15 | 5.44E-08 | 3.85E-12    | 8.81E-08 | 1.00E+00 | 1.26E-04 |
| phe.Fasting_ | rs142789100 | S8 | DIAPH1                | rs114565620 | S8         | RCL1      | 2.03E-17 | 8.30E-10 | 1.43E-13    | 8.23E-09 | 3.35E-01 | 1.57E-05 |
| phe.Fasting_ | rs142789100 | S8 | DIAPH1                | rs115083290 | S19        | NA        | 8.17E-17 | 3.34E-09 | 3.58E-13    | 2.77E-09 | 1.13E-01 | 5.90E-06 |
| phe.Fasting_ | rs142789100 | S8 | DIAPH1                | rs115752779 | S19        | NA        | 8.17E-17 | 3.34E-09 | 3.58E-13    | 2.77E-09 | 1.13E-01 | 5.90E-06 |
| phe.Fasting_ | rs142789100 | S8 | DIAPH1                | rs115787552 | S5         | KPNA3     | 5.05E-16 | 2.06E-08 | 1.59E-12    | 2.34E-14 | 9.53E-07 | 1.79E-10 |
| phe.Fasting_ | rs142789100 | S8 | DIAPH1                | rs115888477 | S8         | NA        | 3.68E-15 | 1.50E-07 | 9.90E-12    | 4.11E-15 | 1.67E-07 | 3.84E-11 |
| phe.Fasting_ | rs142789100 | S8 | DIAPH1                | rs116011837 | S9         | BRD2      | 9.60E-12 | 3.92E-04 | 1.53E-08    | 9.05E-15 | 3.68E-07 | 7.90E-11 |
| phe.Fasting_ | rs142789100 | S8 | DIAPH1                | rs116079984 | S8         | KPNA3     | 5.05E-16 | 2.06E-08 | 1.59E-12    | 2.56E-14 | 1.04E-06 | 1.94E-10 |
| phe.Fasting_ | rs142789100 | S8 | DIAPH1                | rs116120727 | S9         | BRD2      | 9.60E-12 | 3.92E-04 | 1.53E-08    | 9.05E-15 | 3.68E-07 | 7.90E-11 |
| phe.Fasting_ | rs142789100 | S8 | DIAPH1                | rs116406581 | S2         | NA        | 5.24E-15 | 2.14E-07 | 1.36E-11    | 5.32E-08 | 1.00E+00 | 8.11E-05 |
| phe.Fasting_ | rs142789100 | S8 | DIAPH1                | rs116548615 | S8         | TMEM45B   | 2.95E-17 | 1.21E-09 | 1.69E-13    | 1.76E-12 | 7.17E-05 | 7.72E-09 |
| phe.Fasting_ | rs142789100 | S8 | DIAPH1                | rs116696844 | S3         | AP3M2     | 1.90E-15 | 7.75E-08 | 5.41E-12    | 8.81E-08 | 1.00E+00 | 1.26E-04 |
| phe.Fasting_ | rs142789100 | S8 | DIAPH1                | rs11989304  | S4         | TMEM64    | 5.56E-07 | 1.00E+00 | 3.61E-04    | 1.11E-11 | 4.53E-04 | 4.10E-08 |
| phe.Fasting_ | rs142789100 | S8 | DIAPH1                | rs140524622 | S7         | MRPL10    | 1.81E-17 | 7.37E-10 | 1.32E-13    | 2.83E-06 | 1.00E+00 | 2.79E-03 |
| phe.Fasting_ | rs142789100 | S8 | DIAPH1                | rs146815317 | S5         | KPNA3     | 5.05E-16 | 2.06E-08 | 1.59E-12    | 2.34E-14 | 9.53E-07 | 1.79E-10 |
| phe.Fasting_ | rs142789100 | S8 | DIAPH1                | rs150117838 | S8         | KPNA3     | 5.05E-16 | 2.06E-08 | 1.59E-12    | 2.16E-14 | 8.80E-07 | 1.71E-10 |
| phe.Fasting_ | rs142789100 | S8 | DIAPH1                | rs150916187 | S4         | HIST1H2BK | 4.14E-06 | 1.00E+00 | 2.11E-03    | 2.61E-15 | 1.06E-07 | 2.55E-11 |
| phe.Fasting_ | rs142789100 | S8 | DIAPH1                | rs16894241  | S4         | HIST1H2BK | 3.73E-12 | 1.52E-04 | 6.73E-09    | 6.62E-15 | 2.69E-07 | 5.94E-11 |
| phe.Fasting_ | rs142789100 | S8 | DIAPH1                | rs34801978  | S3         | HOXB2     | 2.19E-06 | 1.00E+00 | 1.21E-03    | 1.65E-09 | 6.71E-02 | 3.72E-06 |
| phe.Fasting_ | rs142789100 | S8 | DIAPH1                | rs4732511   | S13        | POR       | 9.61E-15 | 3.93E-07 | 2.45E-11    | 2.36E-06 | 1.00E+00 | 2.39E-03 |
| phe.Fasting_ | rs142789100 | S8 | DIAPH1                | rs57503635  | S3         | NA        | 1.28E-16 | 5.23E-09 | 5.19E-13    | 6.61E-15 | 2.69E-07 | 5.94E-11 |
| phe.Fasting_ | rs142789100 | S8 | DIAPH1                | rs60011869  | S16        | NA        | 2.13E-06 | 1        | 1.18E-03    | 1.78E-07 | 1.00E+00 | 2.39E-04 |
| phe.Fasting_ | rs142789100 | S8 | DIAPH1                | rs6964407   | S7         | POR       | 3.32E-14 | 1.36E-06 | 8.04E-11    | 2.16E-06 | 1.00E+00 | 2.22E-03 |
| phe.Fasting_ | rs142789100 | S8 | DIAPH1                | rs7004597   | S8         | NA        | 1.25E-15 | 5.12E-08 | 3.65E-12    | 5.12E-08 | 1.00E+00 | 7.84E-05 |

|                           |        |             |     |             |          |             |             |          |          |          |
|---------------------------|--------|-------------|-----|-------------|----------|-------------|-------------|----------|----------|----------|
| phe.Fasting_rs142789100S8 | DIAPH1 | rs7256517   | S7  | CYTH2       | 1.59E-16 | 6.48E-09    | 6.03E-13    | 9.69E-13 | 3.95E-05 | 4.59E-09 |
| phe.Fasting_rs142789100S8 | DIAPH1 | rs73283603  | S7  | ZWINT       | 4.49E-07 | 1           | 2.97E-04    | 4.53E-08 | 1.00E+00 | 7.02E-05 |
| phe.Fasting_rs142789100S8 | DIAPH1 | rs73392640  | S8  | POLR3B      | 4.58E-11 | 0.00187102  | 6.24E-08    | 6.82E-12 | 2.78E-04 | 2.62E-08 |
| phe.Fasting_rs142789100S8 | DIAPH1 | rs73619637  | S8  | NA          | 2.00E-16 | 8.15E-09    | 6.95E-13    | 6.35E-08 | 1.00E+00 | 9.54E-05 |
| phe.Fasting_rs142789100S8 | DIAPH1 | rs74627895  | S8  | TMEM64      | 1.64E-07 | 1           | 1.18E-04    | 4.42E-09 | 1.80E-01 | 8.98E-06 |
| phe.Fasting_rs142789100S8 | DIAPH1 | rs74914207  | S24 | NA          | 2.89E-11 | 0.00117833  | 4.13E-08    | 1.56E-11 | 6.34E-04 | 5.60E-08 |
| phe.Fasting_rs142789100S8 | DIAPH1 | rs75350765  | S5  | RCL1        | 2.03E-17 | 8.30E-10    | 1.43E-13    | 8.23E-09 | 3.35E-01 | 1.57E-05 |
| phe.Fasting_rs142789100S8 | DIAPH1 | rs75374128  | S5  | CNTLN       | 5.25E-06 | 1           | 0.00259743  | 1.83E-08 | 7.47E-01 | 3.18E-05 |
| phe.Fasting_rs142789100S8 | DIAPH1 | rs75506779  | S5  | TMCO3       | 1.04E-07 | 1           | 7.88E-05    | 2.32E-09 | 9.43E-02 | 5.04E-06 |
| phe.Fasting_rs142789100S8 | DIAPH1 | rs75758702  | S24 | NA          | 1.04E-17 | 4.25E-10    | 9.89E-14    | 2.85E-11 | 1.16E-03 | 9.77E-08 |
| phe.Fasting_rs142789100S8 | DIAPH1 | rs75864203  | S8  | CNTLN       | 5.25E-06 | 1.00E+00    | 2.60E-03    | 1.83E-08 | 7.47E-01 | 3.18E-05 |
| phe.Fasting_rs142789100S8 | DIAPH1 | rs75949566  | S5  | TMEM64      | 6.52E-07 | 1.00E+00    | 4.16E-04    | 1.49E-11 | 6.08E-04 | 5.38E-08 |
| phe.Fasting_rs142789100S8 | DIAPH1 | rs76844308  | S8  | CNTLN       | 2.67E-06 | 1.00E+00    | 1.44E-03    | 1.80E-08 | 7.34E-01 | 3.14E-05 |
| phe.Fasting_rs142789100S8 | DIAPH1 | rs7763107   | S8  | FARS2       | 9.44E-17 | 3.86E-09    | 4.06E-13    | 1.60E-12 | 6.52E-05 | 7.13E-09 |
| phe.Fasting_rs142789100S8 | DIAPH1 | rs77798597  | S7  | KPNA3       | 5.05E-16 | 2.06E-08    | 1.59E-12    | 2.16E-14 | 8.80E-07 | 1.71E-10 |
| phe.Fasting_rs142789100S8 | DIAPH1 | rs77845645  | S21 | NA          | 3.35E-07 | 1.00E+00    | 2.29E-04    | 1.04E-11 | 4.24E-04 | 3.85E-08 |
| phe.Fasting_rs142789100S8 | DIAPH1 | rs78353402  | S8  | AP3M2       | 1.25E-15 | 5.12E-08    | 3.65E-12    | 8.81E-08 | 1.00E+00 | 1.26E-04 |
| phe.Fasting_rs142789100S8 | DIAPH1 | rs78516788  | S8  | SLC38A1     | 1.24E-06 | 1           | 7.38E-04    | 2.76E-09 | 1.12E-01 | 5.89E-06 |
| phe.Fasting_rs142789100S8 | DIAPH1 | rs78697063  | S5  | MSI2        | 7.77E-20 | 3.17E-12    | 2.23E-14    | 1.45E-10 | 5.92E-03 | 4.35E-07 |
| phe.Fasting_rs142789100S8 | DIAPH1 | rs78703708  | S7  | FAF2        | 7.40E-12 | 0.000302252 | 1.27E-08    | 7.08E-06 | 1.00E+00 | 6.12E-03 |
| phe.Fasting_rs142789100S8 | DIAPH1 | rs78722272  | S5  | CNTLN       | 5.25E-06 | 1           | 2.60E-03    | 1.89E-08 | 7.67E-01 | 3.26E-05 |
| phe.Fasting_rs142789100S8 | DIAPH1 | rs78736524  | S5  | KPNA3       | 5.05E-16 | 2.06E-08    | 1.59E-12    | 2.34E-14 | 9.53E-07 | 1.79E-10 |
| phe.Fasting_rs142789100S8 | DIAPH1 | rs78990344  | S2  | LOC10050631 | 5.56E-07 | 1           | 0.000361481 | 1.11E-11 | 4.53E-04 | 4.10E-08 |
| phe.Fasting_rs142789100S8 | DIAPH1 | rs79781495  | S8  | KPNA3       | 5.05E-16 | 2.06E-08    | 1.59E-12    | 2.16E-14 | 8.80E-07 | 1.71E-10 |
| phe.Fasting_rs142789100S8 | DIAPH1 | rs80200953  | S8  | PPP2R5D     | 1.41E-17 | 5.76E-10    | 1.14E-13    | 8.37E-10 | 3.41E-02 | 2.03E-06 |
| phe.Fasting_rs142789100S8 | DIAPH1 | rs80332465  | S5  | KPNA3       | 5.36E-16 | 2.19E-08    | 1.67E-12    | 2.32E-14 | 9.45E-07 | 1.79E-10 |
| phe.Fasting_rs142789100S8 | DIAPH1 | rs80334773  | S5  | KPNA3       | 5.36E-16 | 2.19E-08    | 1.67E-12    | 2.32E-14 | 9.45E-07 | 1.79E-10 |
| phe.Fasting_rs142789100S8 | DIAPH1 | rs891061    | S7  | POP4        | 6.59E-07 | 1.00E+00    | 4.20E-04    | 1.19E-05 | 1.00E+00 | 9.35E-03 |
| phe.Fasting_rs142812798S7 | DIAPH1 | rs111576333 | S5  | TMEM64      | 5.56E-07 | 1           | 0.000361481 | 7.80E-15 | 3.17E-07 | 6.90E-11 |
| phe.Fasting_rs142812798S7 | DIAPH1 | rs112089881 | S8  | ZFAND4      | 3.24E-18 | 1.32E-10    | 5.45E-14    | 1.95E-10 | 7.96E-03 | 5.56E-07 |
| phe.Fasting_rs142812798S7 | DIAPH1 | rs112091318 | S5  | TMEM64      | 1.64E-07 | 1           | 0.000118218 | 9.13E-09 | 3.72E-01 | 1.72E-05 |
| phe.Fasting_rs142812798S7 | DIAPH1 | rs114334325 | S7  | AP3M2       | 1.25E-15 | 5.12E-08    | 3.65E-12    | 8.81E-08 | 1.00E+00 | 1.26E-04 |
| phe.Fasting_rs142812798S7 | DIAPH1 | rs114394395 | S7  | AP3M2       | 1.33E-15 | 5.44E-08    | 3.85E-12    | 8.81E-08 | 1.00E+00 | 1.26E-04 |
| phe.Fasting_rs142812798S7 | DIAPH1 | rs114565620 | S8  | RCL1        | 2.03E-17 | 8.30E-10    | 1.43E-13    | 8.23E-09 | 3.35E-01 | 1.57E-05 |
| phe.Fasting_rs142812798S7 | DIAPH1 | rs115083290 | S19 | NA          | 8.17E-17 | 3.34E-09    | 3.58E-13    | 2.77E-09 | 1.13E-01 | 5.90E-06 |
| phe.Fasting_rs142812798S7 | DIAPH1 | rs115752779 | S19 | NA          | 8.17E-17 | 3.34E-09    | 3.58E-13    | 2.77E-09 | 1.13E-01 | 5.90E-06 |
| phe.Fasting_rs142812798S7 | DIAPH1 | rs115787552 | S5  | KPNA3       | 5.05E-16 | 2.06E-08    | 1.59E-12    | 2.34E-14 | 9.53E-07 | 1.79E-10 |
| phe.Fasting_rs142812798S7 | DIAPH1 | rs115888477 | S8  | NA          | 3.68E-15 | 1.50E-07    | 9.90E-12    | 4.11E-15 | 1.67E-07 | 3.84E-11 |
| phe.Fasting_rs142812798S7 | DIAPH1 | rs116011837 | S9  | BRD2        | 9.60E-12 | 3.92E-04    | 1.53E-08    | 9.05E-15 | 3.68E-07 | 7.90E-11 |
| phe.Fasting_rs142812798S7 | DIAPH1 | rs116079984 | S8  | KPNA3       | 5.05E-16 | 2.06E-08    | 1.59E-12    | 2.56E-14 | 1.04E-06 | 1.94E-10 |

|              |               |        |               |             |          |             |             |          |          |          |
|--------------|---------------|--------|---------------|-------------|----------|-------------|-------------|----------|----------|----------|
| phe.Fasting_ | rs142812798S7 | DIAPH1 | rs116120727S9 | BRD2        | 9.60E-12 | 3.92E-04    | 1.53E-08    | 9.05E-15 | 3.68E-07 | 7.90E-11 |
| phe.Fasting_ | rs142812798S7 | DIAPH1 | rs116406581S2 | NA          | 5.24E-15 | 2.14E-07    | 1.36E-11    | 5.32E-08 | 1.00E+00 | 8.11E-05 |
| phe.Fasting_ | rs142812798S7 | DIAPH1 | rs116548615S8 | TMEM45B     | 2.95E-17 | 1.21E-09    | 1.69E-13    | 1.76E-12 | 7.17E-05 | 7.72E-09 |
| phe.Fasting_ | rs142812798S7 | DIAPH1 | rs116696844S3 | AP3M2       | 1.90E-15 | 7.75E-08    | 5.41E-12    | 8.81E-08 | 1.00E+00 | 1.26E-04 |
| phe.Fasting_ | rs142812798S7 | DIAPH1 | rs11989304S4  | TMEM64      | 5.56E-07 | 1.00E+00    | 3.61E-04    | 1.11E-11 | 4.53E-04 | 4.10E-08 |
| phe.Fasting_ | rs142812798S7 | DIAPH1 | rs140524622S7 | MRPL10      | 1.81E-17 | 7.37E-10    | 1.32E-13    | 2.83E-06 | 1.00E+00 | 2.79E-03 |
| phe.Fasting_ | rs142812798S7 | DIAPH1 | rs146815317S5 | KPNA3       | 5.05E-16 | 2.06E-08    | 1.59E-12    | 2.34E-14 | 9.53E-07 | 1.79E-10 |
| phe.Fasting_ | rs142812798S7 | DIAPH1 | rs150117838S8 | KPNA3       | 5.05E-16 | 2.06E-08    | 1.59E-12    | 2.16E-14 | 8.80E-07 | 1.71E-10 |
| phe.Fasting_ | rs142812798S7 | DIAPH1 | rs150916187S4 | HIST1H2BK   | 4.14E-06 | 1           | 2.11E-03    | 2.61E-15 | 1.06E-07 | 2.55E-11 |
| phe.Fasting_ | rs142812798S7 | DIAPH1 | rs16894241S4  | HIST1H2BK   | 3.73E-12 | 0.000152384 | 6.73E-09    | 6.62E-15 | 2.69E-07 | 5.94E-11 |
| phe.Fasting_ | rs142812798S7 | DIAPH1 | rs34801978S3  | HOXB2       | 2.19E-06 | 1.00E+00    | 1.21E-03    | 1.65E-09 | 6.71E-02 | 3.72E-06 |
| phe.Fasting_ | rs142812798S7 | DIAPH1 | rs4732511S13  | POR         | 9.61E-15 | 3.93E-07    | 2.45E-11    | 2.36E-06 | 1.00E+00 | 2.39E-03 |
| phe.Fasting_ | rs142812798S7 | DIAPH1 | rs57503635S3  | NA          | 1.28E-16 | 5.23E-09    | 5.19E-13    | 6.61E-15 | 2.69E-07 | 5.94E-11 |
| phe.Fasting_ | rs142812798S7 | DIAPH1 | rs60011869S16 | NA          | 2.13E-06 | 1.00E+00    | 1.18E-03    | 1.78E-07 | 1.00E+00 | 2.39E-04 |
| phe.Fasting_ | rs142812798S7 | DIAPH1 | rs6964407S7   | POR         | 3.32E-14 | 1.36E-06    | 8.04E-11    | 2.16E-06 | 1.00E+00 | 2.22E-03 |
| phe.Fasting_ | rs142812798S7 | DIAPH1 | rs7004597S8   | NA          | 1.25E-15 | 5.12E-08    | 3.65E-12    | 5.12E-08 | 1.00E+00 | 7.84E-05 |
| phe.Fasting_ | rs142812798S7 | DIAPH1 | rs7256517S7   | CYTH2       | 1.59E-16 | 6.48E-09    | 6.03E-13    | 9.69E-13 | 3.95E-05 | 4.59E-09 |
| phe.Fasting_ | rs142812798S7 | DIAPH1 | rs73283603S7  | ZWINT       | 4.49E-07 | 1           | 0.000297012 | 4.53E-08 | 1.00E+00 | 7.02E-05 |
| phe.Fasting_ | rs142812798S7 | DIAPH1 | rs73392640S8  | POLR3B      | 4.58E-11 | 1.87E-03    | 6.24E-08    | 6.82E-12 | 2.78E-04 | 2.62E-08 |
| phe.Fasting_ | rs142812798S7 | DIAPH1 | rs73619637S8  | NA          | 2.00E-16 | 8.15E-09    | 6.95E-13    | 6.35E-08 | 1.00E+00 | 9.54E-05 |
| phe.Fasting_ | rs142812798S7 | DIAPH1 | rs74627895S8  | TMEM64      | 1.64E-07 | 1.00E+00    | 1.18E-04    | 4.42E-09 | 1.80E-01 | 8.98E-06 |
| phe.Fasting_ | rs142812798S7 | DIAPH1 | rs74914207S24 | NA          | 2.89E-11 | 1.18E-03    | 4.13E-08    | 1.56E-11 | 6.34E-04 | 5.60E-08 |
| phe.Fasting_ | rs142812798S7 | DIAPH1 | rs75350765S5  | RCL1        | 2.03E-17 | 8.30E-10    | 1.43E-13    | 8.23E-09 | 3.35E-01 | 1.57E-05 |
| phe.Fasting_ | rs142812798S7 | DIAPH1 | rs75374128S5  | CNTLN       | 5.25E-06 | 1.00E+00    | 2.60E-03    | 1.83E-08 | 7.47E-01 | 3.18E-05 |
| phe.Fasting_ | rs142812798S7 | DIAPH1 | rs75506779S5  | TMCO3       | 1.04E-07 | 1.00E+00    | 7.88E-05    | 2.32E-09 | 9.43E-02 | 5.04E-06 |
| phe.Fasting_ | rs142812798S7 | DIAPH1 | rs75758702S24 | NA          | 1.04E-17 | 4.25E-10    | 9.89E-14    | 2.85E-11 | 1.16E-03 | 9.77E-08 |
| phe.Fasting_ | rs142812798S7 | DIAPH1 | rs75864203S8  | CNTLN       | 5.25E-06 | 1.00E+00    | 2.60E-03    | 1.83E-08 | 7.47E-01 | 3.18E-05 |
| phe.Fasting_ | rs142812798S7 | DIAPH1 | rs75949566S5  | TMEM64      | 6.52E-07 | 1.00E+00    | 4.16E-04    | 1.49E-11 | 6.08E-04 | 5.38E-08 |
| phe.Fasting_ | rs142812798S7 | DIAPH1 | rs76844308S8  | CNTLN       | 2.67E-06 | 1.00E+00    | 1.44E-03    | 1.80E-08 | 7.34E-01 | 3.14E-05 |
| phe.Fasting_ | rs142812798S7 | DIAPH1 | rs7763107S8   | FARS2       | 9.44E-17 | 3.86E-09    | 4.06E-13    | 1.60E-12 | 6.52E-05 | 7.13E-09 |
| phe.Fasting_ | rs142812798S7 | DIAPH1 | rs77798597S7  | KPNA3       | 5.05E-16 | 2.06E-08    | 1.59E-12    | 2.16E-14 | 8.80E-07 | 1.71E-10 |
| phe.Fasting_ | rs142812798S7 | DIAPH1 | rs77845645S21 | NA          | 3.35E-07 | 1           | 2.29E-04    | 1.04E-11 | 4.24E-04 | 3.85E-08 |
| phe.Fasting_ | rs142812798S7 | DIAPH1 | rs78353402S8  | AP3M2       | 1.25E-15 | 5.12E-08    | 3.65E-12    | 8.81E-08 | 1.00E+00 | 1.26E-04 |
| phe.Fasting_ | rs142812798S7 | DIAPH1 | rs78516788S8  | SLC38A1     | 1.24E-06 | 1           | 0.000737575 | 2.76E-09 | 1.12E-01 | 5.89E-06 |
| phe.Fasting_ | rs142812798S7 | DIAPH1 | rs78697063S5  | MSI2        | 7.77E-20 | 3.17E-12    | 2.23E-14    | 1.45E-10 | 5.92E-03 | 4.35E-07 |
| phe.Fasting_ | rs142812798S7 | DIAPH1 | rs78703708S7  | FAF2        | 7.40E-12 | 3.02E-04    | 1.27E-08    | 7.08E-06 | 1.00E+00 | 6.12E-03 |
| phe.Fasting_ | rs142812798S7 | DIAPH1 | rs78722272S5  | CNTLN       | 5.25E-06 | 1.00E+00    | 2.60E-03    | 1.89E-08 | 7.67E-01 | 3.26E-05 |
| phe.Fasting_ | rs142812798S7 | DIAPH1 | rs78736524S5  | KPNA3       | 5.05E-16 | 2.06E-08    | 1.59E-12    | 2.34E-14 | 9.53E-07 | 1.79E-10 |
| phe.Fasting_ | rs142812798S7 | DIAPH1 | rs78990344S2  | LOC10050631 | 5.56E-07 | 1.00E+00    | 3.61E-04    | 1.11E-11 | 4.53E-04 | 4.10E-08 |
| phe.Fasting_ | rs142812798S7 | DIAPH1 | rs79781495S8  | KPNA3       | 5.05E-16 | 2.06E-08    | 1.59E-12    | 2.16E-14 | 8.80E-07 | 1.71E-10 |

|                           |        |                |              |          |             |          |          |          |          |
|---------------------------|--------|----------------|--------------|----------|-------------|----------|----------|----------|----------|
| phe.Fasting_rs142812798S7 | DIAPH1 | rs80200953 S8  | PPP2R5D      | 1.41E-17 | 5.76E-10    | 1.14E-13 | 8.37E-10 | 3.41E-02 | 2.03E-06 |
| phe.Fasting_rs142812798S7 | DIAPH1 | rs80332465 S5  | KPNA3        | 5.36E-16 | 2.19E-08    | 1.67E-12 | 2.32E-14 | 9.45E-07 | 1.79E-10 |
| phe.Fasting_rs142812798S7 | DIAPH1 | rs80334773 S5  | KPNA3        | 5.36E-16 | 2.19E-08    | 1.67E-12 | 2.32E-14 | 9.45E-07 | 1.79E-10 |
| phe.Fasting_rs142812798S7 | DIAPH1 | rs891061 S7    | POP4         | 6.59E-07 | 1.00E+00    | 4.20E-04 | 1.19E-05 | 1.00E+00 | 9.35E-03 |
| phe.Fasting_rs142888461S7 | NEK1   | rs112027720S7  | DIAPH1       | 1.60E-11 | 6.54E-04    | 2.44E-08 | 1.65E-08 | 6.72E-01 | 2.89E-05 |
| phe.Fasting_rs142888461S7 | NEK1   | rs112089881S8  | ZFAND4       | 4.26E-18 | 1.74E-10    | 6.30E-14 | 4.15E-09 | 1.69E-01 | 8.48E-06 |
| phe.Fasting_rs142888461S7 | NEK1   | rs113219478S7  | DIAPH1       | 1.60E-11 | 0.000653967 | 2.44E-08 | 1.65E-08 | 6.72E-01 | 2.89E-05 |
| phe.Fasting_rs142888461S7 | NEK1   | rs113357907S24 | ISL1         | 9.27E-18 | 3.79E-10    | 9.26E-14 | 6.30E-16 | 2.56E-08 | 1.16E-11 |
| phe.Fasting_rs142888461S7 | NEK1   | rs115888477S8  | NA           | 3.85E-15 | 1.57E-07    | 1.03E-11 | 4.89E-06 | 1.00E+00 | 4.49E-03 |
| phe.Fasting_rs142888461S7 | NEK1   | rs116011837S9  | BRD2         | 3.44E-17 | 1.40E-09    | 1.90E-13 | 1.14E-10 | 4.66E-03 | 3.47E-07 |
| phe.Fasting_rs142888461S7 | NEK1   | rs116120727S9  | BRD2         | 3.44E-17 | 1.40E-09    | 1.90E-13 | 1.14E-10 | 4.66E-03 | 3.47E-07 |
| phe.Fasting_rs142888461S7 | NEK1   | rs138090701S5  | HDAC3        | 1.82E-12 | 7.42E-05    | 3.46E-09 | 7.93E-09 | 3.23E-01 | 1.52E-05 |
| phe.Fasting_rs142888461S7 | NEK1   | rs138136869S7  | DIAPH1       | 2.88E-12 | 0.000117726 | 5.29E-09 | 1.96E-09 | 7.96E-02 | 4.33E-06 |
| phe.Fasting_rs142888461S7 | NEK1   | rs138457103S10 | DIAPH1       | 9.52E-12 | 3.89E-04    | 1.52E-08 | 1.28E-08 | 5.20E-01 | 2.32E-05 |
| phe.Fasting_rs142888461S7 | NEK1   | rs138487229S11 | DIAPH1       | 1.60E-11 | 6.54E-04    | 2.44E-08 | 1.65E-08 | 6.72E-01 | 2.89E-05 |
| phe.Fasting_rs142888461S7 | NEK1   | rs138738950S8  | "PCDHGB2,Pi  | 1.60E-11 | 0.000653967 | 2.44E-08 | 1.64E-08 | 6.68E-01 | 2.88E-05 |
| phe.Fasting_rs142888461S7 | NEK1   | rs139297927S8  | DIAPH1       | 1.60E-11 | 6.54E-04    | 2.44E-08 | 1.65E-08 | 6.72E-01 | 2.89E-05 |
| phe.Fasting_rs142888461S7 | NEK1   | rs139337303S8  | DIAPH1       | 1.60E-11 | 6.54E-04    | 2.44E-08 | 1.65E-08 | 6.72E-01 | 2.89E-05 |
| phe.Fasting_rs142888461S7 | NEK1   | rs139403963S8  | DIAPH1       | 2.88E-12 | 0.000117726 | 5.29E-09 | 1.96E-09 | 7.96E-02 | 4.33E-06 |
| phe.Fasting_rs142888461S7 | NEK1   | rs139621309S18 | "LOC10050506 | 1.60E-11 | 6.54E-04    | 2.44E-08 | 1.65E-08 | 6.72E-01 | 2.89E-05 |
| phe.Fasting_rs142888461S7 | NEK1   | rs139828110S8  | DIAPH1       | 2.88E-12 | 1.18E-04    | 5.29E-09 | 1.96E-09 | 7.96E-02 | 4.33E-06 |
| phe.Fasting_rs142888461S7 | NEK1   | rs140070363S8  | DIAPH1       | 1.60E-11 | 6.54E-04    | 2.44E-08 | 1.65E-08 | 6.72E-01 | 2.89E-05 |
| phe.Fasting_rs142888461S7 | NEK1   | rs140644750S13 | DIAPH1       | 1.60E-11 | 6.54E-04    | 2.44E-08 | 1.65E-08 | 6.72E-01 | 2.89E-05 |
| phe.Fasting_rs142888461S7 | NEK1   | rs141022544S8  | DIAPH1       | 1.60E-11 | 6.54E-04    | 2.44E-08 | 1.65E-08 | 6.72E-01 | 2.89E-05 |
| phe.Fasting_rs142888461S7 | NEK1   | rs141525984S5  | DIAPH1       | 1.60E-11 | 6.54E-04    | 2.44E-08 | 1.65E-08 | 6.72E-01 | 2.89E-05 |
| phe.Fasting_rs142888461S7 | NEK1   | rs141926074S8  | ATE1         | 1.96E-06 | 1.00E+00    | 1.10E-03 | 1.10E-14 | 4.48E-07 | 9.51E-11 |
| phe.Fasting_rs142888461S7 | NEK1   | rs142480565S8  | DIAPH1       | 1.60E-11 | 6.54E-04    | 2.44E-08 | 1.65E-08 | 6.72E-01 | 2.89E-05 |
| phe.Fasting_rs142888461S7 | NEK1   | rs142718558S7  | "DIAPH1,LOC  | 1.60E-11 | 6.54E-04    | 2.44E-08 | 1.65E-08 | 6.72E-01 | 2.89E-05 |
| phe.Fasting_rs142888461S7 | NEK1   | rs142789100S8  | DIAPH1       | 2.88E-12 | 1.18E-04    | 5.29E-09 | 1.96E-09 | 7.96E-02 | 4.33E-06 |
| phe.Fasting_rs142888461S7 | NEK1   | rs142812798S7  | DIAPH1       | 2.88E-12 | 1.18E-04    | 5.29E-09 | 1.96E-09 | 7.96E-02 | 4.33E-06 |
| phe.Fasting_rs142888461S7 | NEK1   | rs143377827S13 | "DIAPH1,LOC  | 2.55E-12 | 0.000104269 | 4.74E-09 | 1.60E-09 | 6.51E-02 | 3.61E-06 |
| phe.Fasting_rs142888461S7 | NEK1   | rs143691978S11 | DIAPH1       | 2.88E-12 | 0.000117726 | 5.29E-09 | 3.42E-09 | 1.39E-01 | 7.14E-06 |
| phe.Fasting_rs142888461S7 | NEK1   | rs144081334S11 | DIAPH1       | 2.88E-12 | 0.000117726 | 5.29E-09 | 3.42E-09 | 1.39E-01 | 7.14E-06 |
| phe.Fasting_rs142888461S7 | NEK1   | rs144613910S8  | DIAPH1       | 1.60E-11 | 0.000653967 | 2.44E-08 | 1.65E-08 | 6.72E-01 | 2.89E-05 |
| phe.Fasting_rs142888461S7 | NEK1   | rs145027704S11 | DIAPH1       | 2.88E-12 | 0.000117726 | 5.29E-09 | 3.42E-09 | 1.39E-01 | 7.14E-06 |
| phe.Fasting_rs142888461S7 | NEK1   | rs146220673S7  | DIAPH1       | 1.60E-11 | 0.000653967 | 2.44E-08 | 1.65E-08 | 6.72E-01 | 2.89E-05 |
| phe.Fasting_rs142888461S7 | NEK1   | rs146622060S13 | DIAPH1       | 2.88E-12 | 0.000117726 | 5.29E-09 | 3.42E-09 | 1.39E-01 | 7.14E-06 |
| phe.Fasting_rs142888461S7 | NEK1   | rs146878162S7  | DIAPH1       | 1.60E-11 | 0.000653967 | 2.44E-08 | 1.65E-08 | 6.72E-01 | 2.89E-05 |
| phe.Fasting_rs142888461S7 | NEK1   | rs1470889 S5   | ZC3H3        | 1.71E-06 | 1           | 9.78E-04 | 1.99E-07 | 1.00E+00 | 2.63E-04 |
| phe.Fasting_rs142888461S7 | NEK1   | rs1470890 S5   | ZC3H3        | 1.71E-06 | 1           | 9.78E-04 | 1.99E-07 | 1.00E+00 | 2.63E-04 |

|                           |      |                |             |          |             |             |          |           |          |
|---------------------------|------|----------------|-------------|----------|-------------|-------------|----------|-----------|----------|
| phe.Fasting_rs142888461S7 | NEK1 | rs147314451S8  | DIAPH1      | 1.60E-11 | 0.000653967 | 2.44E-08    | 1.65E-08 | 6.72E-01  | 2.89E-05 |
| phe.Fasting_rs142888461S7 | NEK1 | rs147417996S7  | DIAPH1      | 2.88E-12 | 1.18E-04    | 5.29E-09    | 3.42E-09 | 1.39E-01  | 7.14E-06 |
| phe.Fasting_rs142888461S7 | NEK1 | rs147646948S7  | "LOC1005056 | 1.60E-11 | 6.54E-04    | 2.44E-08    | 1.65E-08 | 6.72E-01  | 2.89E-05 |
| phe.Fasting_rs142888461S7 | NEK1 | rs147677041S8  | DIAPH1      | 2.88E-12 | 1.18E-04    | 5.29E-09    | 1.96E-09 | 7.96E-02  | 4.33E-06 |
| phe.Fasting_rs142888461S7 | NEK1 | rs148116628S7  | DIAPH1      | 1.60E-11 | 6.54E-04    | 2.44E-08    | 1.65E-08 | 6.72E-01  | 2.89E-05 |
| phe.Fasting_rs142888461S7 | NEK1 | rs148423011S7  | DIAPH1      | 1.60E-11 | 0.000653967 | 2.44E-08    | 1.65E-08 | 0.672373  | 2.89E-05 |
| phe.Fasting_rs142888461S7 | NEK1 | rs149019627S8  | DIAPH1      | 2.88E-12 | 0.000117726 | 5.29E-09    | 1.96E-09 | 0.079617  | 4.33E-06 |
| phe.Fasting_rs142888461S7 | NEK1 | rs149075406S8  | DIAPH1      | 1.60E-11 | 0.000653967 | 2.44E-08    | 1.65E-08 | 0.672373  | 2.89E-05 |
| phe.Fasting_rs142888461S7 | NEK1 | rs149334783S8  | DIAPH1      | 1.60E-11 | 0.000653967 | 2.44E-08    | 1.65E-08 | 0.672373  | 2.89E-05 |
| phe.Fasting_rs142888461S7 | NEK1 | rs149716949S5  | DIAPH1      | 1.36E-12 | 5.57E-05    | 2.68E-09    | 1.76E-09 | 0.0715219 | 3.93E-06 |
| phe.Fasting_rs142888461S7 | NEK1 | rs149791570S5  | DIAPH1      | 2.88E-12 | 0.000117726 | 5.29E-09    | 1.96E-09 | 0.079617  | 4.33E-06 |
| phe.Fasting_rs142888461S7 | NEK1 | rs150452206S13 | "DIAPH1,LOC | 1.60E-11 | 0.000653967 | 2.44E-08    | 1.65E-08 | 0.672373  | 2.89E-05 |
| phe.Fasting_rs142888461S7 | NEK1 | rs150675915S7  | DIAPH1      | 1.60E-11 | 0.000653967 | 2.44E-08    | 1.65E-08 | 0.672373  | 2.89E-05 |
| phe.Fasting_rs142888461S7 | NEK1 | rs150765570S7  | DIAPH1      | 1.60E-11 | 6.54E-04    | 2.44E-08    | 1.65E-08 | 0.672373  | 2.89E-05 |
| phe.Fasting_rs142888461S7 | NEK1 | rs150992994S11 | "PCDHGA5,PI | 1.67E-11 | 0.0006812   | "2.54E-08   | 1.57E-08 | 0.638392  | 2.77E-05 |
| phe.Fasting_rs142888461S7 | NEK1 | rs151204700S8  | DIAPH1      | 1.60E-11 | 0.000653967 | 2.44E-08    | 1.65E-08 | 0.672373  | 2.89E-05 |
| phe.Fasting_rs142888461S7 | NEK1 | rs151330468S8  | DIAPH1      | 2.88E-12 | 0.000117726 | 5.29E-09    | 3.42E-09 | 0.139072  | 7.14E-06 |
| phe.Fasting_rs142888461S7 | NEK1 | rs16894241 S4  | HIST1H2BK   | 8.77E-08 | 1           | 6.77E-05    | 3.72E-07 | 1         | 4.60E-04 |
| phe.Fasting_rs142888461S7 | NEK1 | rs180772028S8  | "DIAPH1,LOC | 1.60E-11 | 0.000653967 | 2.44E-08    | 1.65E-08 | 0.672373  | 2.89E-05 |
| phe.Fasting_rs142888461S7 | NEK1 | rs181224861S7  | DIAPH1      | 1.60E-11 | 0.000653967 | 2.44E-08    | 1.65E-08 | 0.672373  | 2.89E-05 |
| phe.Fasting_rs142888461S7 | NEK1 | rs182714699S8  | DIAPH1      | 1.60E-11 | 6.54E-04    | 2.44E-08    | 1.65E-08 | 0.672373  | 2.89E-05 |
| phe.Fasting_rs142888461S7 | NEK1 | rs182965141S8  | DIAPH1      | 3.52E-12 | 1.44E-04    | 6.36E-09    | 1.04E-09 | 0.0423791 | 2.47E-06 |
| phe.Fasting_rs142888461S7 | NEK1 | rs183597049S7  | DIAPH1      | 1.60E-11 | 6.54E-04    | 2.44E-08    | 1.65E-08 | 0.672373  | 2.89E-05 |
| phe.Fasting_rs142888461S7 | NEK1 | rs183980988S2  | NA          | 1.60E-11 | 6.54E-04    | 2.44E-08    | 1.65E-08 | 0.672373  | 2.89E-05 |
| phe.Fasting_rs142888461S7 | NEK1 | rs184233232S7  | DIAPH1      | 1.60E-11 | 6.54E-04    | 2.44E-08    | 1.65E-08 | 0.672373  | 2.89E-05 |
| phe.Fasting_rs142888461S7 | NEK1 | rs184509477S13 | "PCDHGB4,PI | 1.60E-11 | 0.000653967 | 2.44E-08    | 1.65E-08 | 0.672373  | 2.89E-05 |
| phe.Fasting_rs142888461S7 | NEK1 | rs185069296S15 | "LOC1005056 | 1.60E-11 | 0.000653967 | 2.44E-08    | 1.65E-08 | 0.672373  | 2.89E-05 |
| phe.Fasting_rs142888461S7 | NEK1 | rs185502834S8  | DIAPH1      | 2.88E-12 | 0.000117726 | 5.29E-09    | 1.96E-09 | 0.079617  | 4.33E-06 |
| phe.Fasting_rs142888461S7 | NEK1 | rs185759881S7  | DIAPH1      | 1.60E-11 | 0.000653967 | 2.44E-08    | 1.65E-08 | 0.672373  | 2.89E-05 |
| phe.Fasting_rs142888461S7 | NEK1 | rs187000011S11 | DIAPH1      | 1.60E-11 | 6.54E-04    | 2.44E-08    | 1.65E-08 | 0.672373  | 2.89E-05 |
| phe.Fasting_rs142888461S7 | NEK1 | rs188981295S5  | "RPS27AP10, | 1.60E-11 | 6.54E-04    | 2.44E-08    | 1.65E-08 | 0.672373  | 2.89E-05 |
| phe.Fasting_rs142888461S7 | NEK1 | rs190559574S7  | DIAPH1      | 2.88E-12 | 1.18E-04    | 5.29E-09    | 1.96E-09 | 0.079617  | 4.33E-06 |
| phe.Fasting_rs142888461S7 | NEK1 | rs191544043S8  | DIAPH1      | 1.60E-11 | 6.54E-04    | 2.44E-08    | 1.65E-08 | 0.672373  | 2.89E-05 |
| phe.Fasting_rs142888461S7 | NEK1 | rs191766712S7  | DIAPH1      | 1.60E-11 | 6.54E-04    | 2.44E-08    | 1.65E-08 | 0.672373  | 2.89E-05 |
| phe.Fasting_rs142888461S7 | NEK1 | rs192690040S7  | DIAPH1      | 1.60E-11 | 0.000653967 | 2.44E-08    | 1.65E-08 | 0.672373  | 2.89E-05 |
| phe.Fasting_rs142888461S7 | NEK1 | rs192765219S7  | DIAPH1      | 1.60E-11 | 0.000653967 | 2.44E-08    | 1.65E-08 | 0.672373  | 2.89E-05 |
| phe.Fasting_rs142888461S7 | NEK1 | rs192770525S7  | DIAPH1      | 1.60E-11 | 6.54E-04    | 2.44E-08    | 1.65E-08 | 0.672373  | 2.89E-05 |
| phe.Fasting_rs142888461S7 | NEK1 | rs2924507 S5   | ZC3H3       | 1.71E-06 | 1.00E+00    | 9.78E-04    | 1.99E-07 | 1         | 2.63E-04 |
| phe.Fasting_rs142888461S7 | NEK1 | rs2924508 S8   | ZC3H3       | 1.71E-06 | 1           | 0.000978033 | 2.90E-07 | 1         | 3.69E-04 |
| phe.Fasting_rs142888461S7 | NEK1 | rs2924511 S7   | ZC3H3       | 1.71E-06 | 1           | 0.000978033 | 1.69E-07 | 1         | 2.27E-04 |



|              |             |     |             |             |     |             |          |             |             |          |             |          |
|--------------|-------------|-----|-------------|-------------|-----|-------------|----------|-------------|-------------|----------|-------------|----------|
| phe.Fasting_ | rs142888461 | S7  | NEK1        | rs2924512   | S7  | ZC3H3       | 1.86E-06 | 1           | 0.0010547   | 2.01E-07 | 1           | 2.66E-04 |
| phe.Fasting_ | rs142888461 | S7  | NEK1        | rs2956376   | S8  | ZC3H3       | 1.71E-06 | 1           | 0.000978033 | 1.08E-07 | 1           | 1.51E-04 |
| phe.Fasting_ | rs142888461 | S7  | NEK1        | rs2980270   | S7  | ZC3H3       | 1.71E-06 | 1           | 0.000978033 | 1.08E-07 | 1           | 1.51E-04 |
| phe.Fasting_ | rs142888461 | S7  | NEK1        | rs2980272   | S7  | ZC3H3       | 1.86E-06 | 1           | 0.0010547   | 2.12E-07 | 1           | 2.79E-04 |
| phe.Fasting_ | rs142888461 | S7  | NEK1        | rs2980275   | S5  | ZC3H3       | 1.71E-06 | 1.00E+00    | 9.78E-04    | 1.99E-07 | 1           | 2.63E-04 |
| phe.Fasting_ | rs142888461 | S7  | NEK1        | rs35990401  | S7  | DIAPH1      | 1.46E-11 | 5.95E-04    | 2.24E-08    | 5.87E-09 | 0.238952    | 1.15E-05 |
| phe.Fasting_ | rs142888461 | S7  | NEK1        | rs366767    | S5  | ZC3H3       | 3.05E-06 | 1.00E+00    | 1.61E-03    | 1.14E-07 | 1           | 1.59E-04 |
| phe.Fasting_ | rs142888461 | S7  | NEK1        | rs55900860  | S7  | DIAPH1      | 2.88E-12 | 0.000117726 | 5.29E-09    | 1.96E-09 | 0.079617    | 4.33E-06 |
| phe.Fasting_ | rs142888461 | S7  | NEK1        | rs6881310   | S23 | ISL1        | 6.43E-17 | 2.62E-09    | 2.96E-13    | 1.73E-12 | 7.04E-05    | 7.61E-09 |
| phe.Fasting_ | rs142888461 | S7  | NEK1        | rs73619637  | S8  | NA          | 1.52E-16 | 6.22E-09    | 5.86E-13    | 1.04E-08 | 0.422183    | 1.91E-05 |
| phe.Fasting_ | rs142888461 | S7  | NEK1        | rs77444916  | S23 | LOC642366   | 2.32E-17 | 9.46E-10    | 1.47E-13    | 5.90E-16 | 2.40E-08    | 1.16E-11 |
| phe.Fasting_ | rs142888461 | S7  | NEK1        | rs78703708  | S7  | FAF2        | 5.75E-09 | 0.234924    | 5.59E-06    | 1.16E-07 | 1           | 1.62E-04 |
| phe.Fasting_ | rs142888461 | S7  | NEK1        | rs79517926  | S15 | "DIAPH1,LOC | 4.61E-12 | 1.88E-04    | 8.25E-09    | 1.10E-09 | 0.044934    | 2.60E-06 |
| phe.Fasting_ | rs142888461 | S7  | NEK1        | rs80258830  | S24 | LOC642366   | 2.32E-17 | 9.46E-10    | 1.47E-13    | 5.90E-16 | 2.40E-08    | 1.16E-11 |
| phe.Fasting_ | rs143377827 | S13 | "DIAPH1,LOC | rs1000115   | S5  | LPAR1       | 2.25E-05 | 1.00E+00    | 9.22E-03    | 1.22E-08 | 0.4953      | 2.22E-05 |
| phe.Fasting_ | rs143377827 | S13 | "DIAPH1,LOC | rs111576333 | S5  | TMEM64      | 5.70E-07 | 1.00E+00    | 3.70E-04    | 6.68E-15 | 2.72E-07    | 5.98E-11 |
| phe.Fasting_ | rs143377827 | S13 | "DIAPH1,LOC | rs112089881 | S8  | ZFAND4      | 3.54E-18 | 1.44E-10    | 5.67E-14    | 1.61E-10 | 0.00653416  | 4.68E-07 |
| phe.Fasting_ | rs143377827 | S13 | "DIAPH1,LOC | rs112091318 | S5  | TMEM64      | 1.69E-07 | 1.00E+00    | 1.22E-04    | 7.58E-09 | 0.308404    | 1.45E-05 |
| phe.Fasting_ | rs143377827 | S13 | "DIAPH1,LOC | rs114334325 | S7  | AP3M2       | 1.02E-15 | 4.17E-08    | 3.03E-12    | 7.18E-08 | 1           | 1.05E-04 |
| phe.Fasting_ | rs143377827 | S13 | "DIAPH1,LOC | rs114394395 | S7  | AP3M2       | 1.09E-15 | 4.46E-08    | 3.20E-12    | 7.18E-08 | 1           | 1.05E-04 |
| phe.Fasting_ | rs143377827 | S13 | "DIAPH1,LOC | rs114565620 | S8  | RCL1        | 2.36E-17 | 9.63E-10    | 1.48E-13    | 6.88E-09 | 0.279975    | 1.33E-05 |
| phe.Fasting_ | rs143377827 | S13 | "DIAPH1,LOC | rs115083290 | S19 | NA          | 8.45E-17 | 3.45E-09    | 3.69E-13    | 2.21E-09 | 0.089791    | 4.82E-06 |
| phe.Fasting_ | rs143377827 | S13 | "DIAPH1,LOC | rs115752779 | S19 | NA          | 8.45E-17 | 3.45E-09    | 3.69E-13    | 2.21E-09 | 0.089791    | 4.82E-06 |
| phe.Fasting_ | rs143377827 | S13 | "DIAPH1,LOC | rs115787552 | S5  | KPNA3       | 5.29E-16 | 2.16E-08    | 1.66E-12    | 1.98E-14 | 8.05E-07    | 1.59E-10 |
| phe.Fasting_ | rs143377827 | S13 | "DIAPH1,LOC | rs115888477 | S8  | NA          | 3.83E-15 | 1.56E-07    | 1.02E-11    | 3.47E-15 | 1.41E-07    | 3.32E-11 |
| phe.Fasting_ | rs143377827 | S13 | "DIAPH1,LOC | rs116011837 | S9  | BRD2        | 8.87E-12 | 0.000362046 | 1.47E-08    | 7.51E-15 | 3.06E-07    | 6.66E-11 |
| phe.Fasting_ | rs143377827 | S13 | "DIAPH1,LOC | rs116079984 | S8  | KPNA3       | 5.29E-16 | 2.16E-08    | 1.66E-12    | 2.14E-14 | 8.71E-07    | 1.70E-10 |
| phe.Fasting_ | rs143377827 | S13 | "DIAPH1,LOC | rs116120727 | S9  | BRD2        | 8.87E-12 | 0.000362046 | 1.47E-08    | 7.51E-15 | 3.06E-07    | 6.66E-11 |
| phe.Fasting_ | rs143377827 | S13 | "DIAPH1,LOC | rs116406581 | S2  | NA          | 4.35E-15 | 1.78E-07    | 1.15E-11    | 4.32E-08 | 1           | 6.72E-05 |
| phe.Fasting_ | rs143377827 | S13 | "DIAPH1,LOC | rs116548615 | S8  | TMEM45B     | 3.14E-17 | 1.28E-09    | 1.77E-13    | 1.39E-12 | 5.67E-05    | 6.30E-09 |
| phe.Fasting_ | rs143377827 | S13 | "DIAPH1,LOC | rs116696844 | S3  | AP3M2       | 1.58E-15 | 6.47E-08    | 4.54E-12    | 7.18E-08 | 1           | 1.05E-04 |
| phe.Fasting_ | rs143377827 | S13 | "DIAPH1,LOC | rs11989304  | S4  | TMEM64      | 5.70E-07 | 1           | 3.70E-04    | 9.36E-12 | 0.000380878 | 3.49E-08 |
| phe.Fasting_ | rs143377827 | S13 | "DIAPH1,LOC | rs140524622 | S7  | MRPL10      | 1.92E-17 | 7.86E-10    | 1.39E-13    | 2.19E-06 | 1           | 2.24E-03 |
| phe.Fasting_ | rs143377827 | S13 | "DIAPH1,LOC | rs146815317 | S5  | KPNA3       | 5.29E-16 | 2.16E-08    | 1.66E-12    | 1.98E-14 | 8.05E-07    | 1.59E-10 |
| phe.Fasting_ | rs143377827 | S13 | "DIAPH1,LOC | rs1470889   | S5  | ZC3H3       | 2.02E-05 | 1           | 8.41E-03    | 1.51E-14 | 6.15E-07    | 1.27E-10 |
| phe.Fasting_ | rs143377827 | S13 | "DIAPH1,LOC | rs1470890   | S5  | ZC3H3       | 2.02E-05 | 1           | 8.41E-03    | 1.51E-14 | 6.15E-07    | 1.27E-10 |
| phe.Fasting_ | rs143377827 | S13 | "DIAPH1,LOC | rs150117838 | S8  | KPNA3       | 5.29E-16 | 2.16E-08    | 1.66E-12    | 1.82E-14 | 7.42E-07    | 1.50E-10 |
| phe.Fasting_ | rs143377827 | S13 | "DIAPH1,LOC | rs150916187 | S4  | HIST1H2BK   | 3.83E-06 | 1           | 0.00196721  | 2.08E-15 | 8.48E-08    | 2.12E-11 |
| phe.Fasting_ | rs143377827 | S13 | "DIAPH1,LOC | rs16894241  | S4  | HIST1H2BK   | 3.21E-12 | 0.000131135 | 5.86E-09    | 5.53E-15 | 2.25E-07    | 5.05E-11 |
| phe.Fasting_ | rs143377827 | S13 | "DIAPH1,LOC | rs2924507   | S5  | ZC3H3       | 2.02E-05 | 1.00E+00    | 8.41E-03    | 1.51E-14 | 6.15E-07    | 1.27E-10 |

|              |             |     |                       |     |             |          |            |             |          |             |          |
|--------------|-------------|-----|-----------------------|-----|-------------|----------|------------|-------------|----------|-------------|----------|
| phe.Fasting_ | rs143377827 | S13 | "DIAPH1,LOCrs2924508  | S8  | ZC3H3       | 2.02E-05 | 1.00E+00   | 8.41E-03    | 2.13E-14 | 8.68E-07    | 1.70E-10 |
| phe.Fasting_ | rs143377827 | S13 | "DIAPH1,LOCrs2924511  | S7  | ZC3H3       | 2.02E-05 | 1          | 0.00840749  | 2.05E-14 | 8.35E-07    | 1.63E-10 |
| phe.Fasting_ | rs143377827 | S13 | "DIAPH1,LOCrs2924512  | S7  | ZC3H3       | 2.17E-05 | 1          | 0.0089589   | 2.64E-14 | 1.07E-06    | 1.99E-10 |
| phe.Fasting_ | rs143377827 | S13 | "DIAPH1,LOCrs2956376  | S8  | ZC3H3       | 2.02E-05 | 1          | 0.00840749  | 1.34E-14 | 5.47E-07    | 1.14E-10 |
| phe.Fasting_ | rs143377827 | S13 | "DIAPH1,LOCrs2980270  | S7  | ZC3H3       | 2.02E-05 | 1          | 0.00840749  | 1.34E-14 | 5.47E-07    | 1.14E-10 |
| phe.Fasting_ | rs143377827 | S13 | "DIAPH1,LOCrs2980272  | S7  | ZC3H3       | 2.17E-05 | 1.00E+00   | 8.96E-03    | 2.97E-14 | 1.21E-06    | 2.22E-10 |
| phe.Fasting_ | rs143377827 | S13 | "DIAPH1,LOCrs2980275  | S5  | ZC3H3       | 2.02E-05 | 1          | 8.41E-03    | 1.51E-14 | 6.15E-07    | 1.27E-10 |
| phe.Fasting_ | rs143377827 | S13 | "DIAPH1,LOCrs34801978 | S3  | HOXB2       | 2.12E-06 | 1          | 1.18E-03    | 1.23E-09 | 0.0499249   | 2.86E-06 |
| phe.Fasting_ | rs143377827 | S13 | "DIAPH1,LOCrs4732511  | S13 | POR         | 2.57E-16 | 1.05E-08   | 8.70E-13    | 1.22E-06 | 1           | 1.35E-03 |
| phe.Fasting_ | rs143377827 | S13 | "DIAPH1,LOCrs57503635 | S3  | NA          | 1.33E-16 | 5.44E-09   | 5.32E-13    | 5.51E-15 | 2.24E-07    | 5.04E-11 |
| phe.Fasting_ | rs143377827 | S13 | "DIAPH1,LOCrs60011869 | S16 | NA          | 2.03E-06 | 1          | 0.00113474  | 1.47E-07 | 1           | 2.01E-04 |
| phe.Fasting_ | rs143377827 | S13 | "DIAPH1,LOCrs6964407  | S7  | POR         | 9.08E-16 | 3.71E-08   | 2.71E-12    | 1.12E-06 | 1           | 1.25E-03 |
| phe.Fasting_ | rs143377827 | S13 | "DIAPH1,LOCrs7004597  | S8  | NA          | 1.02E-15 | 4.17E-08   | 3.03E-12    | 4.16E-08 | 1           | 6.50E-05 |
| phe.Fasting_ | rs143377827 | S13 | "DIAPH1,LOCrs7256517  | S7  | CYTH2       | 1.72E-16 | 7.03E-09   | 6.15E-13    | 7.89E-13 | 3.21E-05    | 3.77E-09 |
| phe.Fasting_ | rs143377827 | S13 | "DIAPH1,LOCrs73283603 | S7  | ZWINT       | 3.85E-07 | 1          | 0.000260869 | 3.46E-08 | 1           | 5.52E-05 |
| phe.Fasting_ | rs143377827 | S13 | "DIAPH1,LOCrs73392640 | S8  | POLR3B      | 3.87E-11 | 0.00157908 | 5.34E-08    | 5.63E-12 | 0.000229351 | 2.20E-08 |
| phe.Fasting_ | rs143377827 | S13 | "DIAPH1,LOCrs73619637 | S8  | NA          | 2.10E-16 | 8.56E-09   | 7.18E-13    | 5.25E-08 | 1           | 8.03E-05 |
| phe.Fasting_ | rs143377827 | S13 | "DIAPH1,LOCrs74627895 | S8  | TMEM64      | 1.69E-07 | 1          | 1.22E-04    | 3.67E-09 | 0.149515    | 7.60E-06 |
| phe.Fasting_ | rs143377827 | S13 | "DIAPH1,LOCrs74914207 | S24 | NA          | 2.84E-11 | 0.00116023 | 4.07E-08    | 1.25E-11 | 0.000510414 | 4.59E-08 |
| phe.Fasting_ | rs143377827 | S13 | "DIAPH1,LOCrs75350765 | S5  | RCL1        | 2.36E-17 | 9.63E-10   | 1.48E-13    | 6.88E-09 | 0.279975    | 1.33E-05 |
| phe.Fasting_ | rs143377827 | S13 | "DIAPH1,LOCrs75374128 | S5  | CNTLN       | 5.16E-06 | 1          | 2.56E-03    | 1.59E-08 | 0.647215    | 2.80E-05 |
| phe.Fasting_ | rs143377827 | S13 | "DIAPH1,LOCrs75506779 | S5  | TMCO3       | 8.72E-08 | 1          | 6.74E-05    | 1.92E-09 | 0.0779913   | 4.25E-06 |
| phe.Fasting_ | rs143377827 | S13 | "DIAPH1,LOCrs75758702 | S24 | NA          | 1.14E-17 | 4.64E-10   | 1.02E-13    | 2.21E-11 | 0.000898496 | 7.70E-08 |
| phe.Fasting_ | rs143377827 | S13 | "DIAPH1,LOCrs75864203 | S8  | CNTLN       | 5.16E-06 | 1.00E+00   | 2.56E-03    | 1.59E-08 | 0.647215    | 2.80E-05 |
| phe.Fasting_ | rs143377827 | S13 | "DIAPH1,LOCrs75949566 | S5  | TMEM64      | 6.64E-07 | 1          | 0.000422575 | 1.24E-11 | 0.000506733 | 4.56E-08 |
| phe.Fasting_ | rs143377827 | S13 | "DIAPH1,LOCrs76844308 | S8  | CNTLN       | 2.63E-06 | 1          | 0.00141838  | 1.55E-08 | 0.631983    | 2.75E-05 |
| phe.Fasting_ | rs143377827 | S13 | "DIAPH1,LOCrs7763107  | S8  | FARS2       | 1.05E-16 | 4.27E-09   | 4.43E-13    | 1.31E-12 | 5.33E-05    | 5.92E-09 |
| phe.Fasting_ | rs143377827 | S13 | "DIAPH1,LOCrs77798597 | S7  | KPNA3       | 5.29E-16 | 2.16E-08   | 1.66E-12    | 1.82E-14 | 7.42E-07    | 1.50E-10 |
| phe.Fasting_ | rs143377827 | S13 | "DIAPH1,LOCrs77845645 | S21 | NA          | 3.44E-07 | 1.00E+00   | 2.35E-04    | 7.90E-12 | 0.000321712 | 2.99E-08 |
| phe.Fasting_ | rs143377827 | S13 | "DIAPH1,LOCrs78353402 | S8  | AP3M2       | 1.02E-15 | 4.17E-08   | 3.03E-12    | 7.18E-08 | 1           | 1.05E-04 |
| phe.Fasting_ | rs143377827 | S13 | "DIAPH1,LOCrs78516788 | S8  | SLC38A1     | 1.07E-06 | 1.00E+00   | 6.45E-04    | 2.18E-09 | 0.0887153   | 4.77E-06 |
| phe.Fasting_ | rs143377827 | S13 | "DIAPH1,LOCrs78697063 | S5  | MSI2        | 8.73E-20 | 3.57E-12   | 2.23E-14    | 1.11E-10 | 0.00451638  | 3.38E-07 |
| phe.Fasting_ | rs143377827 | S13 | "DIAPH1,LOCrs78703708 | S7  | FAF2        | 6.81E-12 | 2.78E-04   | 1.18E-08    | 6.44E-06 | 1           | 5.65E-03 |
| phe.Fasting_ | rs143377827 | S13 | "DIAPH1,LOCrs78722272 | S5  | CNTLN       | 5.16E-06 | 1.00E+00   | 2.56E-03    | 1.64E-08 | 0.666879    | 2.87E-05 |
| phe.Fasting_ | rs143377827 | S13 | "DIAPH1,LOCrs78736524 | S5  | KPNA3       | 5.29E-16 | 2.16E-08   | 1.66E-12    | 1.98E-14 | 8.05E-07    | 1.59E-10 |
| phe.Fasting_ | rs143377827 | S13 | "DIAPH1,LOCrs78990344 | S2  | LOC1005063! | 5.70E-07 | 1.00E+00   | 3.70E-04    | 9.36E-12 | 0.000380878 | 3.49E-08 |
| phe.Fasting_ | rs143377827 | S13 | "DIAPH1,LOCrs79781495 | S8  | KPNA3       | 5.29E-16 | 2.16E-08   | 1.66E-12    | 1.82E-14 | 7.42E-07    | 1.50E-10 |
| phe.Fasting_ | rs143377827 | S13 | "DIAPH1,LOCrs80200953 | S8  | PPP2R5D     | 1.48E-17 | 6.03E-10   | 1.17E-13    | 6.06E-10 | 0.0246685   | 1.53E-06 |
| phe.Fasting_ | rs143377827 | S13 | "DIAPH1,LOCrs80332465 | S5  | KPNA3       | 5.62E-16 | 2.29E-08   | 1.75E-12    | 1.96E-14 | 7.98E-07    | 1.58E-10 |
| phe.Fasting_ | rs143377827 | S13 | "DIAPH1,LOCrs80334773 | S5  | KPNA3       | 5.62E-16 | 2.29E-08   | 1.75E-12    | 1.96E-14 | 7.98E-07    | 1.58E-10 |

|                             |                        |           |          |            |             |          |             |          |
|-----------------------------|------------------------|-----------|----------|------------|-------------|----------|-------------|----------|
| phe.Fasting_rs143377827 S13 | "DIAPH1,LOCrs891061 S7 | POP4      | 1.25E-08 | 5.10E-01   | 1.14E-05    | 1.20E-05 | 1           | 9.41E-03 |
| phe.Fasting_rs143691978 S11 | DIAPH1 rs111576333 S5  | TMEM64    | 5.56E-07 | 1.00E+00   | 3.61E-04    | 8.30E-15 | 3.38E-07    | 7.30E-11 |
| phe.Fasting_rs143691978 S11 | DIAPH1 rs112089881 S8  | ZFAND4    | 3.24E-18 | 1.32E-10   | 5.45E-14    | 2.00E-10 | 0.0081353   | 5.68E-07 |
| phe.Fasting_rs143691978 S11 | DIAPH1 rs112091318 S5  | TMEM64    | 1.64E-07 | 1.00E+00   | 1.18E-04    | 9.23E-09 | 0.375672    | 1.74E-05 |
| phe.Fasting_rs143691978 S11 | DIAPH1 rs114334325 S7  | AP3M2     | 1.25E-15 | 5.12E-08   | 3.65E-12    | 9.18E-08 | 1           | 1.31E-04 |
| phe.Fasting_rs143691978 S11 | DIAPH1 rs114394395 S7  | AP3M2     | 1.33E-15 | 5.44E-08   | 3.85E-12    | 9.18E-08 | 1           | 1.31E-04 |
| phe.Fasting_rs143691978 S11 | DIAPH1 rs114565620 S8  | RCL1      | 2.03E-17 | 8.30E-10   | 1.43E-13    | 8.22E-09 | 0.334664    | 1.57E-05 |
| phe.Fasting_rs143691978 S11 | DIAPH1 rs115083290 S19 | NA        | 8.17E-17 | 3.34E-09   | 3.58E-13    | 2.95E-09 | 0.120139    | 6.26E-06 |
| phe.Fasting_rs143691978 S11 | DIAPH1 rs115752779 S19 | NA        | 8.17E-17 | 3.34E-09   | 3.58E-13    | 2.95E-09 | 0.120139    | 6.26E-06 |
| phe.Fasting_rs143691978 S11 | DIAPH1 rs115787552 S5  | KPNA3     | 5.05E-16 | 2.06E-08   | 1.59E-12    | 2.49E-14 | 1.01E-06    | 1.89E-10 |
| phe.Fasting_rs143691978 S11 | DIAPH1 rs115888477 S8  | NA        | 3.68E-15 | 1.50E-07   | 9.90E-12    | 4.39E-15 | 1.79E-07    | 4.08E-11 |
| phe.Fasting_rs143691978 S11 | DIAPH1 rs116011837 S9  | BRD2      | 9.60E-12 | 3.92E-04   | 1.53E-08    | 9.42E-15 | 3.84E-07    | 8.18E-11 |
| phe.Fasting_rs143691978 S11 | DIAPH1 rs116079984 S8  | KPNA3     | 5.05E-16 | 2.06E-08   | 1.59E-12    | 2.73E-14 | 1.11E-06    | 2.06E-10 |
| phe.Fasting_rs143691978 S11 | DIAPH1 rs116120727 S9  | BRD2      | 9.60E-12 | 3.92E-04   | 1.53E-08    | 9.42E-15 | 3.84E-07    | 8.18E-11 |
| phe.Fasting_rs143691978 S11 | DIAPH1 rs116406581 S2  | NA        | 5.24E-15 | 2.14E-07   | 1.36E-11    | 5.55E-08 | 1           | 8.42E-05 |
| phe.Fasting_rs143691978 S11 | DIAPH1 rs116548615 S8  | TMEM45B   | 2.95E-17 | 1.21E-09   | 1.69E-13    | 1.84E-12 | 7.48E-05    | 8.04E-09 |
| phe.Fasting_rs143691978 S11 | DIAPH1 rs116696844 S3  | AP3M2     | 1.90E-15 | 7.75E-08   | 5.41E-12    | 9.18E-08 | 1           | 1.31E-04 |
| phe.Fasting_rs143691978 S11 | DIAPH1 rs11989304 S4   | TMEM64    | 5.56E-07 | 1.00E+00   | 3.61E-04    | 1.15E-11 | 0.000469077 | 4.23E-08 |
| phe.Fasting_rs143691978 S11 | DIAPH1 rs140524622 S7  | MRPL10    | 1.81E-17 | 7.37E-10   | 1.32E-13    | 2.85E-06 | 1           | 2.80E-03 |
| phe.Fasting_rs143691978 S11 | DIAPH1 rs146815317 S5  | KPNA3     | 5.05E-16 | 2.06E-08   | 1.59E-12    | 2.49E-14 | 1.01E-06    | 1.89E-10 |
| phe.Fasting_rs143691978 S11 | DIAPH1 rs150117838 S8  | KPNA3     | 5.05E-16 | 2.06E-08   | 1.59E-12    | 2.30E-14 | 9.36E-07    | 1.79E-10 |
| phe.Fasting_rs143691978 S11 | DIAPH1 rs150916187 S4  | HIST1H2BK | 4.14E-06 | 1.00E+00   | 2.11E-03    | 2.81E-15 | 1.14E-07    | 2.72E-11 |
| phe.Fasting_rs143691978 S11 | DIAPH1 rs16894241 S4   | HIST1H2BK | 3.73E-12 | 1.52E-04   | 6.73E-09    | 7.18E-15 | 2.92E-07    | 6.39E-11 |
| phe.Fasting_rs143691978 S11 | DIAPH1 rs34801978 S3   | HOXB2     | 2.19E-06 | 1.00E+00   | 1.21E-03    | 2.24E-09 | 0.0911397   | 4.89E-06 |
| phe.Fasting_rs143691978 S11 | DIAPH1 rs4732511 S13   | POR       | 9.61E-15 | 3.93E-07   | 2.45E-11    | 2.90E-06 | 1           | 2.84E-03 |
| phe.Fasting_rs143691978 S11 | DIAPH1 rs57503635 S3   | NA        | 1.28E-16 | 5.23E-09   | 5.19E-13    | 7.18E-15 | 2.92E-07    | 6.39E-11 |
| phe.Fasting_rs143691978 S11 | DIAPH1 rs60011869 S16  | NA        | 2.13E-06 | 1.00E+00   | 1.18E-03    | 1.84E-07 | 1           | 2.46E-04 |
| phe.Fasting_rs143691978 S11 | DIAPH1 rs6964407 S7    | POR       | 3.32E-14 | 1.36E-06   | 8.04E-11    | 2.65E-06 | 1           | 2.63E-03 |
| phe.Fasting_rs143691978 S11 | DIAPH1 rs7004597 S8    | NA        | 1.25E-15 | 5.12E-08   | 3.65E-12    | 5.36E-08 | 1           | 8.16E-05 |
| phe.Fasting_rs143691978 S11 | DIAPH1 rs7256517 S7    | CYTH2     | 1.59E-16 | 6.48E-09   | 6.03E-13    | 1.01E-12 | 4.13E-05    | 4.74E-09 |
| phe.Fasting_rs143691978 S11 | DIAPH1 rs73283603 S7   | ZWINT     | 4.49E-07 | 1          | 0.000297012 | 4.87E-08 | 1           | 7.49E-05 |
| phe.Fasting_rs143691978 S11 | DIAPH1 rs73392640 S8   | POLR3B    | 4.58E-11 | 0.00187102 | 6.24E-08    | 1.10E-11 | 0.000446024 | 4.04E-08 |
| phe.Fasting_rs143691978 S11 | DIAPH1 rs73619637 S8   | NA        | 2.00E-16 | 8.15E-09   | 6.95E-13    | 6.56E-08 | 1           | 9.80E-05 |
| phe.Fasting_rs143691978 S11 | DIAPH1 rs74627895 S8   | TMEM64    | 1.64E-07 | 1.00E+00   | 1.18E-04    | 4.43E-09 | 0.180369    | 9.00E-06 |
| phe.Fasting_rs143691978 S11 | DIAPH1 rs74914207 S24  | NA        | 2.89E-11 | 0.00117833 | 4.13E-08    | 1.71E-11 | 0.000696754 | 6.13E-08 |
| phe.Fasting_rs143691978 S11 | DIAPH1 rs75350765 S5   | RCL1      | 2.03E-17 | 8.30E-10   | 1.43E-13    | 8.22E-09 | 0.334664    | 1.57E-05 |
| phe.Fasting_rs143691978 S11 | DIAPH1 rs75374128 S5   | CNTLN     | 5.25E-06 | 1          | 2.60E-03    | 1.90E-08 | 0.773981    | 3.28E-05 |
| phe.Fasting_rs143691978 S11 | DIAPH1 rs75506779 S5   | TMCO3     | 1.04E-07 | 1          | 7.88E-05    | 2.35E-09 | 0.0955642   | 5.10E-06 |
| phe.Fasting_rs143691978 S11 | DIAPH1 rs75758702 S24  | NA        | 1.04E-17 | 4.25E-10   | 9.89E-14    | 2.90E-11 | 0.00117848  | 9.92E-08 |
| phe.Fasting_rs143691978 S11 | DIAPH1 rs75864203 S8   | CNTLN     | 5.25E-06 | 1          | 2.60E-03    | 1.90E-08 | 0.773981    | 3.28E-05 |

|                            |        |             |     |            |          |             |             |          |             |          |
|----------------------------|--------|-------------|-----|------------|----------|-------------|-------------|----------|-------------|----------|
| phe.Fasting_rs143691978S11 | DIAPH1 | rs75949566  | S5  | TMEM64     | 6.52E-07 | 1           | 4.16E-04    | 1.56E-11 | 0.000636403 | 5.61E-08 |
| phe.Fasting_rs143691978S11 | DIAPH1 | rs76844308  | S8  | CNTLN      | 2.67E-06 | 1           | 1.44E-03    | 1.85E-08 | 0.754334    | 3.21E-05 |
| phe.Fasting_rs143691978S11 | DIAPH1 | rs7763107   | S8  | FARS2      | 9.44E-17 | 3.86E-09    | 4.06E-13    | 1.67E-12 | 6.82E-05    | 7.43E-09 |
| phe.Fasting_rs143691978S11 | DIAPH1 | rs77798597  | S7  | KPNA3      | 5.05E-16 | 2.06E-08    | 1.59E-12    | 2.30E-14 | 9.36E-07    | 1.79E-10 |
| phe.Fasting_rs143691978S11 | DIAPH1 | rs77845645  | S21 | NA         | 3.35E-07 | 1           | 2.29E-04    | 1.07E-11 | 0.000437137 | 3.97E-08 |
| phe.Fasting_rs143691978S11 | DIAPH1 | rs78353402  | S8  | AP3M2      | 1.25E-15 | 5.12E-08    | 3.65E-12    | 9.18E-08 | 1           | 1.31E-04 |
| phe.Fasting_rs143691978S11 | DIAPH1 | rs78516788  | S8  | SLC38A1    | 1.24E-06 | 1           | 0.000737575 | 2.73E-09 | 0.111147    | 5.83E-06 |
| phe.Fasting_rs143691978S11 | DIAPH1 | rs78697063  | S5  | MSI2       | 7.77E-20 | 3.17E-12    | 2.23E-14    | 1.49E-10 | 0.00608249  | 4.45E-07 |
| phe.Fasting_rs143691978S11 | DIAPH1 | rs78703708  | S7  | FAF2       | 7.40E-12 | 0.000302252 | 1.27E-08    | 7.23E-06 | 1           | 6.23E-03 |
| phe.Fasting_rs143691978S11 | DIAPH1 | rs78722272  | S5  | CNTLN      | 5.25E-06 | 1.00E+00    | 2.60E-03    | 1.95E-08 | 0.795481    | 3.36E-05 |
| phe.Fasting_rs143691978S11 | DIAPH1 | rs78736524  | S5  | KPNA3      | 5.05E-16 | 2.06E-08    | 1.59E-12    | 2.49E-14 | 1.01E-06    | 1.89E-10 |
| phe.Fasting_rs143691978S11 | DIAPH1 | rs78990344  | S2  | LOC1005063 | 5.56E-07 | 1           | 3.61E-04    | 1.15E-11 | 0.000469077 | 4.23E-08 |
| phe.Fasting_rs143691978S11 | DIAPH1 | rs79781495  | S8  | KPNA3      | 5.05E-16 | 2.06E-08    | 1.59E-12    | 2.30E-14 | 9.36E-07    | 1.79E-10 |
| phe.Fasting_rs143691978S11 | DIAPH1 | rs80200953  | S8  | PPP2R5D    | 1.41E-17 | 5.76E-10    | 1.14E-13    | 8.95E-10 | 0.0364115   | 2.15E-06 |
| phe.Fasting_rs143691978S11 | DIAPH1 | rs80332465  | S5  | KPNA3      | 5.36E-16 | 2.19E-08    | 1.67E-12    | 2.47E-14 | 1.00E-06    | 1.88E-10 |
| phe.Fasting_rs143691978S11 | DIAPH1 | rs80334773  | S5  | KPNA3      | 5.36E-16 | 2.19E-08    | 1.67E-12    | 2.47E-14 | 1.00E-06    | 1.88E-10 |
| phe.Fasting_rs143691978S11 | DIAPH1 | rs891061    | S7  | POP4       | 6.59E-07 | 1           | 4.20E-04    | 1.12E-05 | 1           | 8.91E-03 |
| phe.Fasting_rs144081334S11 | DIAPH1 | rs111576333 | S5  | TMEM64     | 5.56E-07 | 1.00E+00    | 3.61E-04    | 8.30E-15 | 3.38E-07    | 7.30E-11 |
| phe.Fasting_rs144081334S11 | DIAPH1 | rs112089881 | S8  | ZFAND4     | 3.24E-18 | 1.32E-10    | 5.45E-14    | 2.00E-10 | 0.0081353   | 5.68E-07 |
| phe.Fasting_rs144081334S11 | DIAPH1 | rs112091318 | S5  | TMEM64     | 1.64E-07 | 1           | 1.18E-04    | 9.23E-09 | 0.375672    | 1.74E-05 |
| phe.Fasting_rs144081334S11 | DIAPH1 | rs114334325 | S7  | AP3M2      | 1.25E-15 | 5.12E-08    | 3.65E-12    | 9.18E-08 | 1           | 1.31E-04 |
| phe.Fasting_rs144081334S11 | DIAPH1 | rs114394395 | S7  | AP3M2      | 1.33E-15 | 5.44E-08    | 3.85E-12    | 9.18E-08 | 1           | 1.31E-04 |
| phe.Fasting_rs144081334S11 | DIAPH1 | rs114565620 | S8  | RCL1       | 2.03E-17 | 8.30E-10    | 1.43E-13    | 8.22E-09 | 0.334664    | 1.57E-05 |
| phe.Fasting_rs144081334S11 | DIAPH1 | rs115083290 | S19 | NA         | 8.17E-17 | 3.34E-09    | 3.58E-13    | 2.95E-09 | 0.120139    | 6.26E-06 |
| phe.Fasting_rs144081334S11 | DIAPH1 | rs115752779 | S19 | NA         | 8.17E-17 | 3.34E-09    | 3.58E-13    | 2.95E-09 | 0.120139    | 6.26E-06 |
| phe.Fasting_rs144081334S11 | DIAPH1 | rs115787552 | S5  | KPNA3      | 5.05E-16 | 2.06E-08    | 1.59E-12    | 2.49E-14 | 1.01E-06    | 1.89E-10 |
| phe.Fasting_rs144081334S11 | DIAPH1 | rs115888477 | S8  | NA         | 3.68E-15 | 1.50E-07    | 9.90E-12    | 4.39E-15 | 1.79E-07    | 4.08E-11 |
| phe.Fasting_rs144081334S11 | DIAPH1 | rs116011837 | S9  | BRD2       | 9.60E-12 | 0.000392176 | 1.53E-08    | 9.42E-15 | 3.84E-07    | 8.18E-11 |
| phe.Fasting_rs144081334S11 | DIAPH1 | rs116079984 | S8  | KPNA3      | 5.05E-16 | 2.06E-08    | 1.59E-12    | 2.73E-14 | 1.11E-06    | 2.06E-10 |
| phe.Fasting_rs144081334S11 | DIAPH1 | rs116120727 | S9  | BRD2       | 9.60E-12 | 0.000392176 | 1.53E-08    | 9.42E-15 | 3.84E-07    | 8.18E-11 |
| phe.Fasting_rs144081334S11 | DIAPH1 | rs116406581 | S2  | NA         | 5.24E-15 | 2.14E-07    | 1.36E-11    | 5.55E-08 | 1           | 8.42E-05 |
| phe.Fasting_rs144081334S11 | DIAPH1 | rs116548615 | S8  | TMEM45B    | 2.95E-17 | 1.21E-09    | 1.69E-13    | 1.84E-12 | 7.48E-05    | 8.04E-09 |
| phe.Fasting_rs144081334S11 | DIAPH1 | rs116696844 | S3  | AP3M2      | 1.90E-15 | 7.75E-08    | 5.41E-12    | 9.18E-08 | 1           | 1.31E-04 |
| phe.Fasting_rs144081334S11 | DIAPH1 | rs11989304  | S4  | TMEM64     | 5.56E-07 | 1           | 3.61E-04    | 1.15E-11 | 0.000469077 | 4.23E-08 |
| phe.Fasting_rs144081334S11 | DIAPH1 | rs140524622 | S7  | MRPL10     | 1.81E-17 | 7.37E-10    | 1.32E-13    | 2.85E-06 | 1           | 2.80E-03 |
| phe.Fasting_rs144081334S11 | DIAPH1 | rs146815317 | S5  | KPNA3      | 5.05E-16 | 2.06E-08    | 1.59E-12    | 2.49E-14 | 1.01E-06    | 1.89E-10 |
| phe.Fasting_rs144081334S11 | DIAPH1 | rs150117838 | S8  | KPNA3      | 5.05E-16 | 2.06E-08    | 1.59E-12    | 2.30E-14 | 9.36E-07    | 1.79E-10 |
| phe.Fasting_rs144081334S11 | DIAPH1 | rs150916187 | S4  | HIST1H2BK  | 4.14E-06 | 1.00E+00    | 2.11E-03    | 2.81E-15 | 1.14E-07    | 2.72E-11 |
| phe.Fasting_rs144081334S11 | DIAPH1 | rs16894241  | S4  | HIST1H2BK  | 3.73E-12 | 0.000152384 | 6.73E-09    | 7.18E-15 | 2.92E-07    | 6.39E-11 |
| phe.Fasting_rs144081334S11 | DIAPH1 | rs34801978  | S3  | HOXB2      | 2.19E-06 | 1           | 1.21E-03    | 2.24E-09 | 0.0911397   | 4.89E-06 |

|                            |        |             |     |             |          |             |             |          |             |          |
|----------------------------|--------|-------------|-----|-------------|----------|-------------|-------------|----------|-------------|----------|
| phe.Fasting_rs144081334S11 | DIAPH1 | rs4732511   | S13 | POR         | 9.61E-15 | 3.93E-07    | 2.45E-11    | 2.90E-06 | 1           | 2.84E-03 |
| phe.Fasting_rs144081334S11 | DIAPH1 | rs57503635  | S3  | NA          | 1.28E-16 | 5.23E-09    | 5.19E-13    | 7.18E-15 | 2.92E-07    | 6.39E-11 |
| phe.Fasting_rs144081334S11 | DIAPH1 | rs60011869  | S16 | NA          | 2.13E-06 | 1           | 1.18E-03    | 1.84E-07 | 1           | 2.46E-04 |
| phe.Fasting_rs144081334S11 | DIAPH1 | rs6964407   | S7  | POR         | 3.32E-14 | 1.36E-06    | 8.04E-11    | 2.65E-06 | 1           | 2.63E-03 |
| phe.Fasting_rs144081334S11 | DIAPH1 | rs7004597   | S8  | NA          | 1.25E-15 | 5.12E-08    | 3.65E-12    | 5.36E-08 | 1           | 8.16E-05 |
| phe.Fasting_rs144081334S11 | DIAPH1 | rs7256517   | S7  | CYTH2       | 1.59E-16 | 6.48E-09    | 6.03E-13    | 1.01E-12 | 4.13E-05    | 4.74E-09 |
| phe.Fasting_rs144081334S11 | DIAPH1 | rs73283603  | S7  | ZWINT       | 4.49E-07 | 1           | 2.97E-04    | 4.87E-08 | 1           | 7.49E-05 |
| phe.Fasting_rs144081334S11 | DIAPH1 | rs73392640  | S8  | POLR3B      | 4.58E-11 | 0.00187102  | 6.24E-08    | 1.10E-11 | 0.000446024 | 4.04E-08 |
| phe.Fasting_rs144081334S11 | DIAPH1 | rs73619637  | S8  | NA          | 2.00E-16 | 8.15E-09    | 6.95E-13    | 6.56E-08 | 1           | 9.80E-05 |
| phe.Fasting_rs144081334S11 | DIAPH1 | rs74627895  | S8  | TMEM64      | 1.64E-07 | 1           | 0.000118218 | 4.43E-09 | 0.180369    | 9.00E-06 |
| phe.Fasting_rs144081334S11 | DIAPH1 | rs74914207  | S24 | NA          | 2.89E-11 | 0.00117833  | 4.13E-08    | 1.71E-11 | 0.000696754 | 6.13E-08 |
| phe.Fasting_rs144081334S11 | DIAPH1 | rs75350765  | S5  | RCL1        | 2.03E-17 | 8.30E-10    | 1.43E-13    | 8.22E-09 | 0.334664    | 1.57E-05 |
| phe.Fasting_rs144081334S11 | DIAPH1 | rs75374128  | S5  | CNTLN       | 5.25E-06 | 1           | 0.00259743  | 1.90E-08 | 0.773981    | 3.28E-05 |
| phe.Fasting_rs144081334S11 | DIAPH1 | rs75506779  | S5  | TMCO3       | 1.04E-07 | 1           | 7.88E-05    | 2.35E-09 | 0.0955642   | 5.10E-06 |
| phe.Fasting_rs144081334S11 | DIAPH1 | rs75758702  | S24 | NA          | 1.04E-17 | 4.25E-10    | 9.89E-14    | 2.90E-11 | 0.00117848  | 9.92E-08 |
| phe.Fasting_rs144081334S11 | DIAPH1 | rs75864203  | S8  | CNTLN       | 5.25E-06 | 1           | 0.00259743  | 1.90E-08 | 0.773981    | 3.28E-05 |
| phe.Fasting_rs144081334S11 | DIAPH1 | rs75949566  | S5  | TMEM64      | 6.52E-07 | 1           | 0.000415514 | 1.56E-11 | 0.000636403 | 5.61E-08 |
| phe.Fasting_rs144081334S11 | DIAPH1 | rs76844308  | S8  | CNTLN       | 2.67E-06 | 1           | 0.00143908  | 1.85E-08 | 0.754334    | 3.21E-05 |
| phe.Fasting_rs144081334S11 | DIAPH1 | rs7763107   | S8  | FARS2       | 9.44E-17 | 3.86E-09    | 4.06E-13    | 1.67E-12 | 6.82E-05    | 7.43E-09 |
| phe.Fasting_rs144081334S11 | DIAPH1 | rs77798597  | S7  | KPNA3       | 5.05E-16 | 2.06E-08    | 1.59E-12    | 2.30E-14 | 9.36E-07    | 1.79E-10 |
| phe.Fasting_rs144081334S11 | DIAPH1 | rs77845645  | S21 | NA          | 3.35E-07 | 1.00E+00    | 2.29E-04    | 1.07E-11 | 0.000437137 | 3.97E-08 |
| phe.Fasting_rs144081334S11 | DIAPH1 | rs78353402  | S8  | AP3M2       | 1.25E-15 | 5.12E-08    | 3.65E-12    | 9.18E-08 | 1           | 1.31E-04 |
| phe.Fasting_rs144081334S11 | DIAPH1 | rs78516788  | S8  | SLC38A1     | 1.24E-06 | 1           | 7.38E-04    | 2.73E-09 | 0.111147    | 5.83E-06 |
| phe.Fasting_rs144081334S11 | DIAPH1 | rs78697063  | S5  | MSI2        | 7.77E-20 | 3.17E-12    | 2.23E-14    | 1.49E-10 | 0.00608249  | 4.45E-07 |
| phe.Fasting_rs144081334S11 | DIAPH1 | rs78703708  | S7  | FAF2        | 7.40E-12 | 0.000302252 | 1.27E-08    | 7.23E-06 | 1           | 6.23E-03 |
| phe.Fasting_rs144081334S11 | DIAPH1 | rs78722272  | S5  | CNTLN       | 5.25E-06 | 1           | 2.60E-03    | 1.95E-08 | 0.795481    | 3.36E-05 |
| phe.Fasting_rs144081334S11 | DIAPH1 | rs78736524  | S5  | KPNA3       | 5.05E-16 | 2.06E-08    | 1.59E-12    | 2.49E-14 | 1.01E-06    | 1.89E-10 |
| phe.Fasting_rs144081334S11 | DIAPH1 | rs78990344  | S2  | LOC10050631 | 5.56E-07 | 1           | 3.61E-04    | 1.15E-11 | 0.000469077 | 4.23E-08 |
| phe.Fasting_rs144081334S11 | DIAPH1 | rs79781495  | S8  | KPNA3       | 5.05E-16 | 2.06E-08    | 1.59E-12    | 2.30E-14 | 9.36E-07    | 1.79E-10 |
| phe.Fasting_rs144081334S11 | DIAPH1 | rs80200953  | S8  | PPP2R5D     | 1.41E-17 | 5.76E-10    | 1.14E-13    | 8.95E-10 | 0.0364115   | 2.15E-06 |
| phe.Fasting_rs144081334S11 | DIAPH1 | rs80332465  | S5  | KPNA3       | 5.36E-16 | 2.19E-08    | 1.67E-12    | 2.47E-14 | 1.00E-06    | 1.88E-10 |
| phe.Fasting_rs144081334S11 | DIAPH1 | rs80334773  | S5  | KPNA3       | 5.36E-16 | 2.19E-08    | 1.67E-12    | 2.47E-14 | 1.00E-06    | 1.88E-10 |
| phe.Fasting_rs144081334S11 | DIAPH1 | rs891061    | S7  | POP4        | 6.59E-07 | 1.00E+00    | 4.20E-04    | 1.12E-05 | 1           | 8.91E-03 |
| phe.Fasting_rs144613910S8  | DIAPH1 | rs111576333 | S5  | TMEM64      | 2.37E-06 | 1.00E+00    | 1.30E-03    | 5.87E-14 | 2.39E-06    | 3.99E-10 |
| phe.Fasting_rs144613910S8  | DIAPH1 | rs112089881 | S8  | ZFAND4      | 2.04E-17 | 8.32E-10    | 1.43E-13    | 1.09E-09 | 0.0445256   | 2.58E-06 |
| phe.Fasting_rs144613910S8  | DIAPH1 | rs112091318 | S5  | TMEM64      | 7.32E-07 | 1.00E+00    | 4.60E-04    | 3.91E-08 | 1           | 6.13E-05 |
| phe.Fasting_rs144613910S8  | DIAPH1 | rs114334325 | S7  | AP3M2       | 4.51E-15 | 1.84E-07    | 1.18E-11    | 3.87E-07 | 1           | 4.75E-04 |
| phe.Fasting_rs144613910S8  | DIAPH1 | rs114394395 | S7  | AP3M2       | 4.81E-15 | 1.97E-07    | 1.25E-11    | 3.87E-07 | 1           | 4.75E-04 |
| phe.Fasting_rs144613910S8  | DIAPH1 | rs114565620 | S8  | RCL1        | 1.82E-16 | 7.42E-09    | 6.37E-13    | 3.70E-08 | 1           | 5.84E-05 |
| phe.Fasting_rs144613910S8  | DIAPH1 | rs115083290 | S19 | NA          | 4.38E-16 | 1.79E-08    | 1.40E-12    | 1.42E-08 | 0.576679    | 2.53E-05 |

|                           |        |                |           |          |             |            |          |             |          |
|---------------------------|--------|----------------|-----------|----------|-------------|------------|----------|-------------|----------|
| phe.Fasting_rs144613910S8 | DIAPH1 | rs11524145 S5  | CDK6      | 7.80E-07 | 1.00E+00    | 4.86E-04   | 7.89E-06 | 1           | 6.69E-03 |
| phe.Fasting_rs144613910S8 | DIAPH1 | rs115752779S19 | NA        | 4.38E-16 | 1.79E-08    | 1.40E-12   | 1.42E-08 | 0.576679    | 2.53E-05 |
| phe.Fasting_rs144613910S8 | DIAPH1 | rs115787552S5  | KPNA3     | 2.97E-15 | 1.21E-07    | 8.14E-12   | 1.18E-13 | 4.80E-06    | 7.06E-10 |
| phe.Fasting_rs144613910S8 | DIAPH1 | rs115888477S8  | NA        | 2.03E-14 | 8.28E-07    | 5.02E-11   | 2.21E-14 | 8.99E-07    | 1.73E-10 |
| phe.Fasting_rs144613910S8 | DIAPH1 | rs116011837S9  | BRD2      | 4.89E-11 | 0.00199774  | 6.62E-08   | 4.07E-14 | 1.66E-06    | 2.85E-10 |
| phe.Fasting_rs144613910S8 | DIAPH1 | rs116079984S8  | KPNA3     | 2.97E-15 | 1.21E-07    | 8.14E-12   | 1.24E-13 | 5.04E-06    | 7.34E-10 |
| phe.Fasting_rs144613910S8 | DIAPH1 | rs116120727S9  | BRD2      | 4.89E-11 | 0.00199774  | 6.62E-08   | 4.07E-14 | 1.66E-06    | 2.85E-10 |
| phe.Fasting_rs144613910S8 | DIAPH1 | rs116406581S2  | NA        | 1.81E-14 | 7.39E-07    | 4.52E-11   | 2.35E-07 | 1           | 3.05E-04 |
| phe.Fasting_rs144613910S8 | DIAPH1 | rs116548615S8  | TMEM45B   | 1.73E-16 | 7.06E-09    | 6.15E-13   | 8.70E-12 | 0.000354153 | 3.26E-08 |
| phe.Fasting_rs144613910S8 | DIAPH1 | rs116696844S3  | AP3M2     | 6.92E-15 | 2.83E-07    | 1.78E-11   | 3.87E-07 | 1           | 4.75E-04 |
| phe.Fasting_rs144613910S8 | DIAPH1 | rs11989304 S4  | TMEM64    | 2.37E-06 | 1           | 1.30E-03   | 6.78E-11 | 0.00276161  | 2.13E-07 |
| phe.Fasting_rs144613910S8 | DIAPH1 | rs140524622S7  | MRPL10    | 1.08E-16 | 4.41E-09    | 4.54E-13   | 7.35E-06 | 1           | 6.31E-03 |
| phe.Fasting_rs144613910S8 | DIAPH1 | rs146815317S5  | KPNA3     | 2.97E-15 | 1.21E-07    | 8.14E-12   | 1.18E-13 | 4.80E-06    | 7.06E-10 |
| phe.Fasting_rs144613910S8 | DIAPH1 | rs150117838S8  | KPNA3     | 2.97E-15 | 1.21E-07    | 8.14E-12   | 1.09E-13 | 4.44E-06    | 6.79E-10 |
| phe.Fasting_rs144613910S8 | DIAPH1 | rs150916187S4  | HIST1H2BK | 1.38E-05 | 1           | 0.00605332 | 1.37E-14 | 5.59E-07    | 1.16E-10 |
| phe.Fasting_rs144613910S8 | DIAPH1 | rs16894241 S4  | HIST1H2BK | 1.99E-11 | 0.000812315 | 2.96E-08   | 3.44E-14 | 1.40E-06    | 2.50E-10 |
| phe.Fasting_rs144613910S8 | DIAPH1 | rs2032062 S8   | NA        | 1.22E-14 | 4.98E-07    | 3.09E-11   | 8.48E-06 | 1           | 7.14E-03 |
| phe.Fasting_rs144613910S8 | DIAPH1 | rs2153597 S8   | ZNF438    | 5.51E-11 | 2.25E-03    | 7.42E-08   | 4.52E-09 | 0.183916    | 9.08E-06 |
| phe.Fasting_rs144613910S8 | DIAPH1 | rs2835656 S7   | TTC3      | 3.01E-10 | 1.23E-02    | 3.60E-07   | 9.12E-06 | 1           | 7.57E-03 |
| phe.Fasting_rs144613910S8 | DIAPH1 | rs34801978 S3  | HOXB2     | 1.23E-05 | 1.00E+00    | 5.46E-03   | 1.03E-08 | 0.419057    | 1.90E-05 |
| phe.Fasting_rs144613910S8 | DIAPH1 | rs352346 S3    | GRPEL2    | 1.85E-11 | 7.55E-04    | 2.78E-08   | 8.42E-06 | 1           | 7.10E-03 |
| phe.Fasting_rs144613910S8 | DIAPH1 | rs3750898 S8   | DCLRE1A   | 2.29E-05 | 1.00E+00    | 9.35E-03   | 8.76E-06 | 1           | 7.32E-03 |
| phe.Fasting_rs144613910S8 | DIAPH1 | rs4732511 S13  | POR       | 2.30E-15 | 9.39E-08    | 6.48E-12   | 9.65E-06 | 1           | 7.93E-03 |
| phe.Fasting_rs144613910S8 | DIAPH1 | rs57503635 S3  | NA        | 6.34E-16 | 2.59E-08    | 1.95E-12   | 3.17E-14 | 1.29E-06    | 2.34E-10 |
| phe.Fasting_rs144613910S8 | DIAPH1 | rs58905476 S7  | TTC3      | 3.29E-10 | 1.34E-02    | 3.90E-07   | 9.79E-06 | 1           | 8.01E-03 |
| phe.Fasting_rs144613910S8 | DIAPH1 | rs60011869 S16 | NA        | 1.04E-05 | 1.00E+00    | 4.72E-03   | 8.16E-10 | 0.0332257   | 1.98E-06 |
| phe.Fasting_rs144613910S8 | DIAPH1 | rs6964407 S7   | POR       | 7.55E-15 | 3.08E-07    | 1.94E-11   | 8.91E-06 | 1           | 7.43E-03 |
| phe.Fasting_rs144613910S8 | DIAPH1 | rs7004597 S8   | NA        | 4.51E-15 | 1.84E-07    | 1.18E-11   | 2.34E-07 | 1           | 3.04E-04 |
| phe.Fasting_rs144613910S8 | DIAPH1 | rs7256517 S7   | CYTH2     | 1.04E-15 | 4.24E-08    | 3.06E-12   | 4.82E-12 | 0.000196022 | 1.91E-08 |
| phe.Fasting_rs144613910S8 | DIAPH1 | rs73283603 S7  | ZWINT     | 1.90E-06 | 1.00E+00    | 1.07E-03   | 2.03E-07 | 1           | 2.68E-04 |
| phe.Fasting_rs144613910S8 | DIAPH1 | rs73392640 S8  | POLR3B    | 2.02E-10 | 8.26E-03    | 2.49E-07   | 5.19E-11 | 0.00211214  | 1.67E-07 |
| phe.Fasting_rs144613910S8 | DIAPH1 | rs734069 S19   | NA        | 2.06E-08 | 8.39E-01    | 1.81E-05   | 6.71E-10 | 0.0272994   | 1.68E-06 |
| phe.Fasting_rs144613910S8 | DIAPH1 | rs73619637 S8  | NA        | 1.44E-15 | 5.89E-08    | 4.14E-12   | 2.05E-10 | 0.00833668  | 5.78E-07 |
| phe.Fasting_rs144613910S8 | DIAPH1 | rs74627895 S8  | TMEM64    | 7.32E-07 | 1.00E+00    | 4.60E-04   | 2.03E-08 | 0.828094    | 3.48E-05 |
| phe.Fasting_rs144613910S8 | DIAPH1 | rs74914207 S24 | NA        | 1.37E-10 | 5.59E-03    | 1.73E-07   | 9.12E-11 | 0.0037135   | 2.80E-07 |
| phe.Fasting_rs144613910S8 | DIAPH1 | rs75350765 S5  | RCL1      | 1.82E-16 | 7.42E-09    | 6.37E-13   | 3.70E-08 | 1           | 5.84E-05 |
| phe.Fasting_rs144613910S8 | DIAPH1 | rs75374128 S5  | CNTLN     | 1.47E-16 | 6.01E-09    | 5.72E-13   | 1.01E-07 | 1           | 1.42E-04 |
| phe.Fasting_rs144613910S8 | DIAPH1 | rs75506779 S5  | TMCO3     | 5.55E-07 | 1.00E+00    | 3.61E-04   | 1.10E-08 | 0.449707    | 2.03E-05 |
| phe.Fasting_rs144613910S8 | DIAPH1 | rs75758702 S24 | NA        | 7.02E-17 | 2.87E-09    | 3.16E-13   | 1.57E-10 | 0.00638323  | 4.59E-07 |
| phe.Fasting_rs144613910S8 | DIAPH1 | rs75864203 S8  | CNTLN     | 1.47E-16 | 6.01E-09    | 5.72E-13   | 1.01E-07 | 1           | 1.42E-04 |

|                            |        |             |     |             |          |          |          |          |             |          |
|----------------------------|--------|-------------|-----|-------------|----------|----------|----------|----------|-------------|----------|
| phe.Fasting_rs144613910S8  | DIAPH1 | rs75949566  | S5  | TMEM64      | 2.76E-06 | 1.00E+00 | 1.47E-03 | 8.48E-11 | 0.00345267  | 2.62E-07 |
| phe.Fasting_rs144613910S8  | DIAPH1 | rs76844308  | S8  | CNTLN       | 7.68E-17 | 3.14E-09 | 3.41E-13 | 9.52E-08 | 1           | 1.35E-04 |
| phe.Fasting_rs144613910S8  | DIAPH1 | rs7763107   | S8  | FARS2       | 5.78E-16 | 2.36E-08 | 1.79E-12 | 9.23E-12 | 0.000375564 | 3.44E-08 |
| phe.Fasting_rs144613910S8  | DIAPH1 | rs77798597  | S7  | KPNA3       | 2.97E-15 | 1.21E-07 | 8.14E-12 | 1.09E-13 | 4.44E-06    | 6.79E-10 |
| phe.Fasting_rs144613910S8  | DIAPH1 | rs77845645  | S21 | NA          | 1.53E-06 | 1.00E+00 | 8.88E-04 | 4.20E-11 | 0.00170882  | 1.38E-07 |
| phe.Fasting_rs144613910S8  | DIAPH1 | rs78353402  | S8  | AP3M2       | 4.51E-15 | 1.84E-07 | 1.18E-11 | 3.87E-07 | 1           | 4.75E-04 |
| phe.Fasting_rs144613910S8  | DIAPH1 | rs78516788  | S8  | SLC38A1     | 2.75E-11 | 1.12E-03 | 3.94E-08 | 2.44E-10 | 0.00992686  | 6.74E-07 |
| phe.Fasting_rs144613910S8  | DIAPH1 | rs78697063  | S5  | MSI2        | 8.23E-19 | 3.36E-11 | 2.70E-14 | 6.84E-10 | 0.0278369   | 1.70E-06 |
| phe.Fasting_rs144613910S8  | DIAPH1 | rs78722272  | S5  | CNTLN       | 1.47E-16 | 6.01E-09 | 5.72E-13 | 1.05E-07 | 1           | 1.48E-04 |
| phe.Fasting_rs144613910S8  | DIAPH1 | rs78736524  | S5  | KPNA3       | 2.97E-15 | 1.21E-07 | 8.14E-12 | 1.18E-13 | 4.80E-06    | 7.06E-10 |
| phe.Fasting_rs144613910S8  | DIAPH1 | rs78990344  | S2  | LOC10050631 | 2.37E-06 | 1.00E+00 | 1.30E-03 | 6.78E-11 | 0.00276161  | 2.13E-07 |
| phe.Fasting_rs144613910S8  | DIAPH1 | rs79781495  | S8  | KPNA3       | 2.97E-15 | 1.21E-07 | 8.14E-12 | 1.09E-13 | 4.44E-06    | 6.79E-10 |
| phe.Fasting_rs144613910S8  | DIAPH1 | rs79886603  | S15 | NA          | 8.71E-08 | 1.00E+00 | 6.74E-05 | 4.66E-07 | 1           | 5.59E-04 |
| phe.Fasting_rs144613910S8  | DIAPH1 | rs80200953  | S8  | PPP2R5D     | 8.49E-17 | 3.47E-09 | 3.69E-13 | 3.65E-09 | 0.148399    | 7.55E-06 |
| phe.Fasting_rs144613910S8  | DIAPH1 | rs80332465  | S5  | KPNA3       | 3.13E-15 | 1.28E-07 | 8.51E-12 | 1.17E-13 | 4.77E-06    | 7.06E-10 |
| phe.Fasting_rs144613910S8  | DIAPH1 | rs80334773  | S5  | KPNA3       | 3.13E-15 | 1.28E-07 | 8.51E-12 | 1.17E-13 | 4.77E-06    | 7.06E-10 |
| phe.Fasting_rs145027704S11 | DIAPH1 | rs111576333 | S5  | TMEM64      | 5.56E-07 | 1.00E+00 | 3.61E-04 | 8.30E-15 | 3.38E-07    | 7.30E-11 |
| phe.Fasting_rs145027704S11 | DIAPH1 | rs112089881 | S8  | ZFAND4      | 3.24E-18 | 1.32E-10 | 5.45E-14 | 2.00E-10 | 0.0081353   | 5.68E-07 |
| phe.Fasting_rs145027704S11 | DIAPH1 | rs112091318 | S5  | TMEM64      | 1.64E-07 | 1.00E+00 | 1.18E-04 | 9.23E-09 | 0.375672    | 1.74E-05 |
| phe.Fasting_rs145027704S11 | DIAPH1 | rs114334325 | S7  | AP3M2       | 1.25E-15 | 5.12E-08 | 3.65E-12 | 9.18E-08 | 1           | 1.31E-04 |
| phe.Fasting_rs145027704S11 | DIAPH1 | rs114394395 | S7  | AP3M2       | 1.33E-15 | 5.44E-08 | 3.85E-12 | 9.18E-08 | 1           | 1.31E-04 |
| phe.Fasting_rs145027704S11 | DIAPH1 | rs114565620 | S8  | RCL1        | 2.03E-17 | 8.30E-10 | 1.43E-13 | 8.22E-09 | 0.334664    | 1.57E-05 |
| phe.Fasting_rs145027704S11 | DIAPH1 | rs115083290 | S19 | NA          | 8.17E-17 | 3.34E-09 | 3.58E-13 | 2.95E-09 | 0.120139    | 6.26E-06 |
| phe.Fasting_rs145027704S11 | DIAPH1 | rs115752779 | S19 | NA          | 8.17E-17 | 3.34E-09 | 3.58E-13 | 2.95E-09 | 0.120139    | 6.26E-06 |
| phe.Fasting_rs145027704S11 | DIAPH1 | rs115787552 | S5  | KPNA3       | 5.05E-16 | 2.06E-08 | 1.59E-12 | 2.49E-14 | 1.01E-06    | 1.89E-10 |
| phe.Fasting_rs145027704S11 | DIAPH1 | rs115888477 | S8  | NA          | 3.68E-15 | 1.50E-07 | 9.90E-12 | 4.39E-15 | 1.79E-07    | 4.08E-11 |
| phe.Fasting_rs145027704S11 | DIAPH1 | rs116011837 | S9  | BRD2        | 9.60E-12 | 3.92E-04 | 1.53E-08 | 9.42E-15 | 3.84E-07    | 8.18E-11 |
| phe.Fasting_rs145027704S11 | DIAPH1 | rs116079984 | S8  | KPNA3       | 5.05E-16 | 2.06E-08 | 1.59E-12 | 2.73E-14 | 1.11E-06    | 2.06E-10 |
| phe.Fasting_rs145027704S11 | DIAPH1 | rs116120727 | S9  | BRD2        | 9.60E-12 | 3.92E-04 | 1.53E-08 | 9.42E-15 | 3.84E-07    | 8.18E-11 |
| phe.Fasting_rs145027704S11 | DIAPH1 | rs116406581 | S2  | NA          | 5.24E-15 | 2.14E-07 | 1.36E-11 | 5.55E-08 | 1           | 8.42E-05 |
| phe.Fasting_rs145027704S11 | DIAPH1 | rs116548615 | S8  | TMEM45B     | 2.95E-17 | 1.21E-09 | 1.69E-13 | 1.84E-12 | 7.48E-05    | 8.04E-09 |
| phe.Fasting_rs145027704S11 | DIAPH1 | rs116696844 | S3  | AP3M2       | 1.90E-15 | 7.75E-08 | 5.41E-12 | 9.18E-08 | 1           | 1.31E-04 |
| phe.Fasting_rs145027704S11 | DIAPH1 | rs11989304  | S4  | TMEM64      | 5.56E-07 | 1.00E+00 | 3.61E-04 | 1.15E-11 | 0.000469077 | 4.23E-08 |
| phe.Fasting_rs145027704S11 | DIAPH1 | rs140524622 | S7  | MRPL10      | 1.81E-17 | 7.37E-10 | 1.32E-13 | 2.85E-06 | 1           | 2.80E-03 |
| phe.Fasting_rs145027704S11 | DIAPH1 | rs146815317 | S5  | KPNA3       | 5.05E-16 | 2.06E-08 | 1.59E-12 | 2.49E-14 | 1.01E-06    | 1.89E-10 |
| phe.Fasting_rs145027704S11 | DIAPH1 | rs150117838 | S8  | KPNA3       | 5.05E-16 | 2.06E-08 | 1.59E-12 | 2.30E-14 | 9.36E-07    | 1.79E-10 |
| phe.Fasting_rs145027704S11 | DIAPH1 | rs150916187 | S4  | HIST1H2BK   | 4.14E-06 | 1.00E+00 | 2.11E-03 | 2.81E-15 | 1.14E-07    | 2.72E-11 |
| phe.Fasting_rs145027704S11 | DIAPH1 | rs16894241  | S4  | HIST1H2BK   | 3.73E-12 | 1.52E-04 | 6.73E-09 | 7.18E-15 | 2.92E-07    | 6.39E-11 |
| phe.Fasting_rs145027704S11 | DIAPH1 | rs34801978  | S3  | HOXB2       | 2.19E-06 | 1.00E+00 | 1.21E-03 | 2.24E-09 | 0.0911397   | 4.89E-06 |
| phe.Fasting_rs145027704S11 | DIAPH1 | rs4732511   | S13 | POR         | 9.61E-15 | 3.93E-07 | 2.45E-11 | 2.90E-06 | 1           | 2.84E-03 |

|                            |             |             |     |            |          |             |             |          |             |          |
|----------------------------|-------------|-------------|-----|------------|----------|-------------|-------------|----------|-------------|----------|
| phe.Fasting_rs145027704S11 | DIAPH1      | rs57503635  | S3  | NA         | 1.28E-16 | 5.23E-09    | 5.19E-13    | 7.18E-15 | 2.92E-07    | 6.39E-11 |
| phe.Fasting_rs145027704S11 | DIAPH1      | rs60011869  | S16 | NA         | 2.13E-06 | 1.00E+00    | 1.18E-03    | 1.84E-07 | 1           | 2.46E-04 |
| phe.Fasting_rs145027704S11 | DIAPH1      | rs6964407   | S7  | POR        | 3.32E-14 | 1.36E-06    | 8.04E-11    | 2.65E-06 | 1           | 2.63E-03 |
| phe.Fasting_rs145027704S11 | DIAPH1      | rs7004597   | S8  | NA         | 1.25E-15 | 5.12E-08    | 3.65E-12    | 5.36E-08 | 1           | 8.16E-05 |
| phe.Fasting_rs145027704S11 | DIAPH1      | rs7256517   | S7  | CYTH2      | 1.59E-16 | 6.48E-09    | 6.03E-13    | 1.01E-12 | 4.13E-05    | 4.74E-09 |
| phe.Fasting_rs145027704S11 | DIAPH1      | rs73283603  | S7  | ZWINT      | 4.49E-07 | 1.00E+00    | 2.97E-04    | 4.87E-08 | 1           | 7.49E-05 |
| phe.Fasting_rs145027704S11 | DIAPH1      | rs73392640  | S8  | POLR3B     | 4.58E-11 | 1.87E-03    | 6.24E-08    | 1.10E-11 | 0.000446024 | 4.04E-08 |
| phe.Fasting_rs145027704S11 | DIAPH1      | rs73619637  | S8  | NA         | 2.00E-16 | 8.15E-09    | 6.95E-13    | 6.56E-08 | 1           | 9.80E-05 |
| phe.Fasting_rs145027704S11 | DIAPH1      | rs74627895  | S8  | TMEM64     | 1.64E-07 | 1.00E+00    | 1.18E-04    | 4.43E-09 | 0.180369    | 9.00E-06 |
| phe.Fasting_rs145027704S11 | DIAPH1      | rs74914207  | S24 | NA         | 2.89E-11 | 1.18E-03    | 4.13E-08    | 1.71E-11 | 0.000696754 | 6.13E-08 |
| phe.Fasting_rs145027704S11 | DIAPH1      | rs75350765  | S5  | RCL1       | 2.03E-17 | 8.30E-10    | 1.43E-13    | 8.22E-09 | 0.334664    | 1.57E-05 |
| phe.Fasting_rs145027704S11 | DIAPH1      | rs75374128  | S5  | CNTLN      | 5.25E-06 | 1.00E+00    | 2.60E-03    | 1.90E-08 | 0.773981    | 3.28E-05 |
| phe.Fasting_rs145027704S11 | DIAPH1      | rs75506779  | S5  | TMCO3      | 1.04E-07 | 1.00E+00    | 7.88E-05    | 2.35E-09 | 0.0955642   | 5.10E-06 |
| phe.Fasting_rs145027704S11 | DIAPH1      | rs75758702  | S24 | NA         | 1.04E-17 | 4.25E-10    | 9.89E-14    | 2.90E-11 | 0.00117848  | 9.92E-08 |
| phe.Fasting_rs145027704S11 | DIAPH1      | rs75864203  | S8  | CNTLN      | 5.25E-06 | 1.00E+00    | 2.60E-03    | 1.90E-08 | 0.773981    | 3.28E-05 |
| phe.Fasting_rs145027704S11 | DIAPH1      | rs75949566  | S5  | TMEM64     | 6.52E-07 | 1.00E+00    | 4.16E-04    | 1.56E-11 | 0.000636403 | 5.61E-08 |
| phe.Fasting_rs145027704S11 | DIAPH1      | rs76844308  | S8  | CNTLN      | 2.67E-06 | 1.00E+00    | 1.44E-03    | 1.85E-08 | 0.754334    | 3.21E-05 |
| phe.Fasting_rs145027704S11 | DIAPH1      | rs7763107   | S8  | FARS2      | 9.44E-17 | 3.86E-09    | 4.06E-13    | 1.67E-12 | 6.82E-05    | 7.43E-09 |
| phe.Fasting_rs145027704S11 | DIAPH1      | rs77798597  | S7  | KPNA3      | 5.05E-16 | 2.06E-08    | 1.59E-12    | 2.30E-14 | 9.36E-07    | 1.79E-10 |
| phe.Fasting_rs145027704S11 | DIAPH1      | rs77845645  | S21 | NA         | 3.35E-07 | 1.00E+00    | 2.29E-04    | 1.07E-11 | 0.000437137 | 3.97E-08 |
| phe.Fasting_rs145027704S11 | DIAPH1      | rs78353402  | S8  | AP3M2      | 1.25E-15 | 5.12E-08    | 3.65E-12    | 9.18E-08 | 1           | 1.31E-04 |
| phe.Fasting_rs145027704S11 | DIAPH1      | rs78516788  | S8  | SLC38A1    | 1.24E-06 | 1           | 0.000737575 | 2.73E-09 | 0.111147    | 5.83E-06 |
| phe.Fasting_rs145027704S11 | DIAPH1      | rs78697063  | S5  | MSI2       | 7.77E-20 | 3.17E-12    | 2.23E-14    | 1.49E-10 | 0.00608249  | 4.45E-07 |
| phe.Fasting_rs145027704S11 | DIAPH1      | rs78703708  | S7  | FAF2       | 7.40E-12 | 0.000302252 | 1.27E-08    | 7.23E-06 | 1           | 6.23E-03 |
| phe.Fasting_rs145027704S11 | DIAPH1      | rs78722272  | S5  | CNTLN      | 5.25E-06 | 1           | 0.00259743  | 1.95E-08 | 0.795481    | 3.36E-05 |
| phe.Fasting_rs145027704S11 | DIAPH1      | rs78736524  | S5  | KPNA3      | 5.05E-16 | 2.06E-08    | 1.59E-12    | 2.49E-14 | 1.01E-06    | 1.89E-10 |
| phe.Fasting_rs145027704S11 | DIAPH1      | rs78990344  | S2  | LOC1005063 | 5.56E-07 | 1.00E+00    | 3.61E-04    | 1.15E-11 | 0.000469077 | 4.23E-08 |
| phe.Fasting_rs145027704S11 | DIAPH1      | rs79781495  | S8  | KPNA3      | 5.05E-16 | 2.06E-08    | 1.59E-12    | 2.30E-14 | 9.36E-07    | 1.79E-10 |
| phe.Fasting_rs145027704S11 | DIAPH1      | rs80200953  | S8  | PPP2R5D    | 1.41E-17 | 5.76E-10    | 1.14E-13    | 8.95E-10 | 0.0364115   | 2.15E-06 |
| phe.Fasting_rs145027704S11 | DIAPH1      | rs80332465  | S5  | KPNA3      | 5.36E-16 | 2.19E-08    | 1.67E-12    | 2.47E-14 | 1.00E-06    | 1.88E-10 |
| phe.Fasting_rs145027704S11 | DIAPH1      | rs80334773  | S5  | KPNA3      | 5.36E-16 | 2.19E-08    | 1.67E-12    | 2.47E-14 | 1.00E-06    | 1.88E-10 |
| phe.Fasting_rs145027704S11 | DIAPH1      | rs891061    | S7  | POP4       | 6.59E-07 | 1           | 0.000419527 | 1.12E-05 | 1           | 8.91E-03 |
| phe.Fasting_rs145412529S8  | "RBL1,RPS3A | rs2285645   | S7  | MTMR3      | 3.16E-09 | 0.129174    | 3.21E-06    | 4.50E-07 | 1           | 5.42E-04 |
| phe.Fasting_rs145412529S8  | "RBL1,RPS3A | rs9620939   | S7  | MTMR3      | 3.36E-09 | 0.13715     | 3.40E-06    | 4.32E-08 | 1           | 6.72E-05 |
| phe.Fasting_rs145412529S8  | "RBL1,RPS3A | rs9625903   | S7  | MTMR3      | 3.96E-09 | 0.161621    | 3.94E-06    | 2.02E-08 | 0.821577    | 3.46E-05 |
| phe.Fasting_rs146220673S7  | DIAPH1      | rs111576333 | S5  | TMEM64     | 2.37E-06 | 1           | 0.00129547  | 5.87E-14 | 2.39E-06    | 3.99E-10 |
| phe.Fasting_rs146220673S7  | DIAPH1      | rs112089881 | S8  | ZFAND4     | 2.04E-17 | 8.32E-10    | 1.43E-13    | 1.09E-09 | 0.0445256   | 2.58E-06 |
| phe.Fasting_rs146220673S7  | DIAPH1      | rs112091318 | S5  | TMEM64     | 7.32E-07 | 1           | 0.000459899 | 3.91E-08 | 1           | 6.13E-05 |
| phe.Fasting_rs146220673S7  | DIAPH1      | rs114334325 | S7  | AP3M2      | 4.51E-15 | 1.84E-07    | 1.18E-11    | 3.87E-07 | 1           | 4.75E-04 |
| phe.Fasting_rs146220673S7  | DIAPH1      | rs114394395 | S7  | AP3M2      | 4.81E-15 | 1.97E-07    | 1.25E-11    | 3.87E-07 | 1           | 4.75E-04 |



|                            |        |                 |           |          |             |             |          |             |          |
|----------------------------|--------|-----------------|-----------|----------|-------------|-------------|----------|-------------|----------|
| phe.Fasting_rs146220673 S7 | DIAPH1 | rs114565620 S8  | RCL1      | 1.82E-16 | 7.42E-09    | 6.37E-13    | 3.70E-08 | 1           | 5.84E-05 |
| phe.Fasting_rs146220673 S7 | DIAPH1 | rs115083290 S19 | NA        | 4.38E-16 | 1.79E-08    | 1.40E-12    | 1.42E-08 | 0.576679    | 2.53E-05 |
| phe.Fasting_rs146220673 S7 | DIAPH1 | rs11524145 S5   | CDK6      | 7.80E-07 | 1           | 0.000486356 | 7.89E-06 | 1           | 6.69E-03 |
| phe.Fasting_rs146220673 S7 | DIAPH1 | rs115752779 S19 | NA        | 4.38E-16 | 1.79E-08    | 1.40E-12    | 1.42E-08 | 0.576679    | 2.53E-05 |
| phe.Fasting_rs146220673 S7 | DIAPH1 | rs115787552 S5  | KPNA3     | 2.97E-15 | 1.21E-07    | 8.14E-12    | 1.18E-13 | 4.80E-06    | 7.06E-10 |
| phe.Fasting_rs146220673 S7 | DIAPH1 | rs115888477 S8  | NA        | 2.03E-14 | 8.28E-07    | 5.02E-11    | 2.21E-14 | 8.99E-07    | 1.73E-10 |
| phe.Fasting_rs146220673 S7 | DIAPH1 | rs116011837 S9  | BRD2      | 4.89E-11 | 0.00199774  | 6.62E-08    | 4.07E-14 | 1.66E-06    | 2.85E-10 |
| phe.Fasting_rs146220673 S7 | DIAPH1 | rs116079984 S8  | KPNA3     | 2.97E-15 | 1.21E-07    | 8.14E-12    | 1.24E-13 | 5.04E-06    | 7.34E-10 |
| phe.Fasting_rs146220673 S7 | DIAPH1 | rs116120727 S9  | BRD2      | 4.89E-11 | 0.00199774  | 6.62E-08    | 4.07E-14 | 1.66E-06    | 2.85E-10 |
| phe.Fasting_rs146220673 S7 | DIAPH1 | rs116406581 S2  | NA        | 1.81E-14 | 7.39E-07    | 4.52E-11    | 2.35E-07 | 1           | 3.05E-04 |
| phe.Fasting_rs146220673 S7 | DIAPH1 | rs116548615 S8  | TMEM45B   | 1.73E-16 | 7.06E-09    | 6.15E-13    | 8.70E-12 | 0.000354153 | 3.26E-08 |
| phe.Fasting_rs146220673 S7 | DIAPH1 | rs116696844 S3  | AP3M2     | 6.92E-15 | 2.83E-07    | 1.78E-11    | 3.87E-07 | 1           | 4.75E-04 |
| phe.Fasting_rs146220673 S7 | DIAPH1 | rs11989304 S4   | TMEM64    | 2.37E-06 | 1           | 0.00129547  | 6.78E-11 | 0.00276161  | 2.13E-07 |
| phe.Fasting_rs146220673 S7 | DIAPH1 | rs140524622 S7  | MRPL10    | 1.08E-16 | 4.41E-09    | 4.54E-13    | 7.35E-06 | 1           | 6.31E-03 |
| phe.Fasting_rs146220673 S7 | DIAPH1 | rs146815317 S5  | KPNA3     | 2.97E-15 | 1.21E-07    | 8.14E-12    | 1.18E-13 | 4.80E-06    | 7.06E-10 |
| phe.Fasting_rs146220673 S7 | DIAPH1 | rs150117838 S8  | KPNA3     | 2.97E-15 | 1.21E-07    | 8.14E-12    | 1.09E-13 | 4.44E-06    | 6.79E-10 |
| phe.Fasting_rs146220673 S7 | DIAPH1 | rs150916187 S4  | HIST1H2BK | 1.38E-05 | 1           | 0.00605332  | 1.37E-14 | 5.59E-07    | 1.16E-10 |
| phe.Fasting_rs146220673 S7 | DIAPH1 | rs16894241 S4   | HIST1H2BK | 1.99E-11 | 0.000812315 | 2.96E-08    | 3.44E-14 | 1.40E-06    | 2.50E-10 |
| phe.Fasting_rs146220673 S7 | DIAPH1 | rs2032062 S8    | NA        | 1.22E-14 | 4.98E-07    | 3.09E-11    | 8.48E-06 | 1           | 7.14E-03 |
| phe.Fasting_rs146220673 S7 | DIAPH1 | rs2153597 S8    | ZNF438    | 5.51E-11 | 0.00224928  | 7.42E-08    | 4.52E-09 | 0.183916    | 9.08E-06 |
| phe.Fasting_rs146220673 S7 | DIAPH1 | rs2835656 S7    | TTC3      | 3.01E-10 | 0.0122766   | 3.60E-07    | 9.12E-06 | 1           | 7.57E-03 |
| phe.Fasting_rs146220673 S7 | DIAPH1 | rs34801978 S3   | HOXB2     | 1.23E-05 | 1           | 0.00545724  | 1.03E-08 | 0.419057    | 1.90E-05 |
| phe.Fasting_rs146220673 S7 | DIAPH1 | rs352346 S3     | GRPEL2    | 1.85E-11 | 0.000754995 | 2.78E-08    | 8.42E-06 | 1           | 7.10E-03 |
| phe.Fasting_rs146220673 S7 | DIAPH1 | rs3750898 S8    | DCLRE1A   | 2.29E-05 | 1           | 0.0093502   | 8.76E-06 | 1           | 7.32E-03 |
| phe.Fasting_rs146220673 S7 | DIAPH1 | rs4732511 S13   | POR       | 2.30E-15 | 9.39E-08    | 6.48E-12    | 9.65E-06 | 1           | 7.93E-03 |
| phe.Fasting_rs146220673 S7 | DIAPH1 | rs57503635 S3   | NA        | 6.34E-16 | 2.59E-08    | 1.95E-12    | 3.17E-14 | 1.29E-06    | 2.34E-10 |
| phe.Fasting_rs146220673 S7 | DIAPH1 | rs58905476 S7   | TTC3      | 3.29E-10 | 0.0134302   | 3.90E-07    | 9.79E-06 | 1           | 8.01E-03 |
| phe.Fasting_rs146220673 S7 | DIAPH1 | rs60011869 S16  | NA        | 1.04E-05 | 1           | 0.00472365  | 8.16E-10 | 0.0332257   | 1.98E-06 |
| phe.Fasting_rs146220673 S7 | DIAPH1 | rs6964407 S7    | POR       | 7.55E-15 | 3.08E-07    | 1.94E-11    | 8.91E-06 | 1           | 7.43E-03 |
| phe.Fasting_rs146220673 S7 | DIAPH1 | rs7004597 S8    | NA        | 4.51E-15 | 1.84E-07    | 1.18E-11    | 2.34E-07 | 1           | 3.04E-04 |
| phe.Fasting_rs146220673 S7 | DIAPH1 | rs7256517 S7    | CYTH2     | 1.04E-15 | 4.24E-08    | 3.06E-12    | 4.82E-12 | 0.000196022 | 1.91E-08 |
| phe.Fasting_rs146220673 S7 | DIAPH1 | rs73283603 S7   | ZWINT     | 1.90E-06 | 1.00E+00    | 1.07E-03    | 2.03E-07 | 1           | 2.68E-04 |
| phe.Fasting_rs146220673 S7 | DIAPH1 | rs73392640 S8   | POLR3B    | 2.02E-10 | 0.00826001  | 2.49E-07    | 5.19E-11 | 0.00211214  | 1.67E-07 |
| phe.Fasting_rs146220673 S7 | DIAPH1 | rs734069 S19    | NA        | 2.06E-08 | 0.839421    | 1.81E-05    | 6.71E-10 | 0.0272994   | 1.68E-06 |
| phe.Fasting_rs146220673 S7 | DIAPH1 | rs73619637 S8   | NA        | 1.44E-15 | 5.89E-08    | 4.14E-12    | 2.05E-10 | 0.00833668  | 5.78E-07 |
| phe.Fasting_rs146220673 S7 | DIAPH1 | rs74627895 S8   | TMEM64    | 7.32E-07 | 1           | 0.000459899 | 2.03E-08 | 0.828094    | 3.48E-05 |
| phe.Fasting_rs146220673 S7 | DIAPH1 | rs74914207 S24  | NA        | 1.37E-10 | 0.00558626  | 1.73E-07    | 9.12E-11 | 0.0037135   | 2.80E-07 |
| phe.Fasting_rs146220673 S7 | DIAPH1 | rs75350765 S5   | RCL1      | 1.82E-16 | 7.42E-09    | 6.37E-13    | 3.70E-08 | 1           | 5.84E-05 |
| phe.Fasting_rs146220673 S7 | DIAPH1 | rs75374128 S5   | CNTLN     | 1.47E-16 | 6.01E-09    | 5.72E-13    | 1.01E-07 | 1           | 1.42E-04 |
| phe.Fasting_rs146220673 S7 | DIAPH1 | rs75506779 S5   | TMCO3     | 5.55E-07 | 1           | 0.000360863 | 1.10E-08 | 0.449707    | 2.03E-05 |

|                             |        |                 |            |          |             |             |          |             |          |
|-----------------------------|--------|-----------------|------------|----------|-------------|-------------|----------|-------------|----------|
| phe.Fasting_rs146220673 S7  | DIAPH1 | rs75758702 S24  | NA         | 7.02E-17 | 2.87E-09    | 3.16E-13    | 1.57E-10 | 0.00638323  | 4.59E-07 |
| phe.Fasting_rs146220673 S7  | DIAPH1 | rs75864203 S8   | CNTLN      | 1.47E-16 | 6.01E-09    | 5.72E-13    | 1.01E-07 | 1           | 1.42E-04 |
| phe.Fasting_rs146220673 S7  | DIAPH1 | rs75949566 S5   | TMEM64     | 2.76E-06 | 1           | 0.001473    | 8.48E-11 | 0.00345267  | 2.62E-07 |
| phe.Fasting_rs146220673 S7  | DIAPH1 | rs76844308 S8   | CNTLN      | 7.68E-17 | 3.14E-09    | 3.41E-13    | 9.52E-08 | 1           | 1.35E-04 |
| phe.Fasting_rs146220673 S7  | DIAPH1 | rs7763107 S8    | FARS2      | 5.78E-16 | 2.36E-08    | 1.79E-12    | 9.23E-12 | 0.000375564 | 3.44E-08 |
| phe.Fasting_rs146220673 S7  | DIAPH1 | rs77798597 S7   | KPNA3      | 2.97E-15 | 1.21E-07    | 8.14E-12    | 1.09E-13 | 4.44E-06    | 6.79E-10 |
| phe.Fasting_rs146220673 S7  | DIAPH1 | rs77845645 S21  | NA         | 1.53E-06 | 1           | 0.000888475 | 4.20E-11 | 0.00170882  | 1.38E-07 |
| phe.Fasting_rs146220673 S7  | DIAPH1 | rs78353402 S8   | AP3M2      | 4.51E-15 | 1.84E-07    | 1.18E-11    | 3.87E-07 | 1           | 4.75E-04 |
| phe.Fasting_rs146220673 S7  | DIAPH1 | rs78516788 S8   | SLC38A1    | 2.75E-11 | 1.12E-03    | 3.94E-08    | 2.44E-10 | 0.00992686  | 6.74E-07 |
| phe.Fasting_rs146220673 S7  | DIAPH1 | rs78697063 S5   | MSI2       | 8.23E-19 | 3.36E-11    | 2.70E-14    | 6.84E-10 | 0.0278369   | 1.70E-06 |
| phe.Fasting_rs146220673 S7  | DIAPH1 | rs78722272 S5   | CNTLN      | 1.47E-16 | 6.01E-09    | 5.72E-13    | 1.05E-07 | 1           | 1.48E-04 |
| phe.Fasting_rs146220673 S7  | DIAPH1 | rs78736524 S5   | KPNA3      | 2.97E-15 | 1.21E-07    | 8.14E-12    | 1.18E-13 | 4.80E-06    | 7.06E-10 |
| phe.Fasting_rs146220673 S7  | DIAPH1 | rs78990344 S2   | LOC1005063 | 2.37E-06 | 1           | 0.00129547  | 6.78E-11 | 0.00276161  | 2.13E-07 |
| phe.Fasting_rs146220673 S7  | DIAPH1 | rs79781495 S8   | KPNA3      | 2.97E-15 | 1.21E-07    | 8.14E-12    | 1.09E-13 | 4.44E-06    | 6.79E-10 |
| phe.Fasting_rs146220673 S7  | DIAPH1 | rs79886603 S15  | NA         | 8.71E-08 | 1           | 6.74E-05    | 4.66E-07 | 1           | 5.59E-04 |
| phe.Fasting_rs146220673 S7  | DIAPH1 | rs80200953 S8   | PPP2R5D    | 8.49E-17 | 3.47E-09    | 3.69E-13    | 3.65E-09 | 0.148399    | 7.55E-06 |
| phe.Fasting_rs146220673 S7  | DIAPH1 | rs80332465 S5   | KPNA3      | 3.13E-15 | 1.28E-07    | 8.51E-12    | 1.17E-13 | 4.77E-06    | 7.06E-10 |
| phe.Fasting_rs146220673 S7  | DIAPH1 | rs80334773 S5   | KPNA3      | 3.13E-15 | 1.28E-07    | 8.51E-12    | 1.17E-13 | 4.77E-06    | 7.06E-10 |
| phe.Fasting_rs146622060 S13 | DIAPH1 | rs111576333 S5  | TMEM64     | 5.56E-07 | 1           | 0.000361481 | 8.30E-15 | 3.38E-07    | 7.30E-11 |
| phe.Fasting_rs146622060 S13 | DIAPH1 | rs112089881 S8  | ZFAND4     | 3.24E-18 | 1.32E-10    | 5.45E-14    | 2.00E-10 | 0.0081353   | 5.68E-07 |
| phe.Fasting_rs146622060 S13 | DIAPH1 | rs112091318 S5  | TMEM64     | 1.64E-07 | 1           | 0.000118218 | 9.23E-09 | 0.375672    | 1.74E-05 |
| phe.Fasting_rs146622060 S13 | DIAPH1 | rs114334325 S7  | AP3M2      | 1.25E-15 | 5.12E-08    | 3.65E-12    | 9.18E-08 | 1           | 1.31E-04 |
| phe.Fasting_rs146622060 S13 | DIAPH1 | rs114394395 S7  | AP3M2      | 1.33E-15 | 5.44E-08    | 3.85E-12    | 9.18E-08 | 1           | 1.31E-04 |
| phe.Fasting_rs146622060 S13 | DIAPH1 | rs114565620 S8  | RCL1       | 2.03E-17 | 8.30E-10    | 1.43E-13    | 8.22E-09 | 0.334664    | 1.57E-05 |
| phe.Fasting_rs146622060 S13 | DIAPH1 | rs115083290 S19 | NA         | 8.17E-17 | 3.34E-09    | 3.58E-13    | 2.95E-09 | 0.120139    | 6.26E-06 |
| phe.Fasting_rs146622060 S13 | DIAPH1 | rs115752779 S19 | NA         | 8.17E-17 | 3.34E-09    | 3.58E-13    | 2.95E-09 | 0.120139    | 6.26E-06 |
| phe.Fasting_rs146622060 S13 | DIAPH1 | rs115787552 S5  | KPNA3      | 5.05E-16 | 2.06E-08    | 1.59E-12    | 2.49E-14 | 1.01E-06    | 1.89E-10 |
| phe.Fasting_rs146622060 S13 | DIAPH1 | rs115888477 S8  | NA         | 3.68E-15 | 1.50E-07    | 9.90E-12    | 4.39E-15 | 1.79E-07    | 4.08E-11 |
| phe.Fasting_rs146622060 S13 | DIAPH1 | rs116011837 S9  | BRD2       | 9.60E-12 | 0.000392176 | 1.53E-08    | 9.42E-15 | 3.84E-07    | 8.18E-11 |
| phe.Fasting_rs146622060 S13 | DIAPH1 | rs116079984 S8  | KPNA3      | 5.05E-16 | 2.06E-08    | 1.59E-12    | 2.73E-14 | 1.11E-06    | 2.06E-10 |
| phe.Fasting_rs146622060 S13 | DIAPH1 | rs116120727 S9  | BRD2       | 9.60E-12 | 0.000392176 | 1.53E-08    | 9.42E-15 | 3.84E-07    | 8.18E-11 |
| phe.Fasting_rs146622060 S13 | DIAPH1 | rs116406581 S2  | NA         | 5.24E-15 | 2.14E-07    | 1.36E-11    | 5.55E-08 | 1           | 8.42E-05 |
| phe.Fasting_rs146622060 S13 | DIAPH1 | rs116548615 S8  | TMEM45B    | 2.95E-17 | 1.21E-09    | 1.69E-13    | 1.84E-12 | 7.48E-05    | 8.04E-09 |
| phe.Fasting_rs146622060 S13 | DIAPH1 | rs116696844 S3  | AP3M2      | 1.90E-15 | 7.75E-08    | 5.41E-12    | 9.18E-08 | 1           | 1.31E-04 |
| phe.Fasting_rs146622060 S13 | DIAPH1 | rs11989304 S4   | TMEM64     | 5.56E-07 | 1           | 3.61E-04    | 1.15E-11 | 0.000469077 | 4.23E-08 |
| phe.Fasting_rs146622060 S13 | DIAPH1 | rs140524622 S7  | MRPL10     | 1.81E-17 | 7.37E-10    | 1.32E-13    | 2.85E-06 | 1           | 2.80E-03 |
| phe.Fasting_rs146622060 S13 | DIAPH1 | rs146815317 S5  | KPNA3      | 5.05E-16 | 2.06E-08    | 1.59E-12    | 2.49E-14 | 1.01E-06    | 1.89E-10 |
| phe.Fasting_rs146622060 S13 | DIAPH1 | rs150117838 S8  | KPNA3      | 5.05E-16 | 2.06E-08    | 1.59E-12    | 2.30E-14 | 9.36E-07    | 1.79E-10 |
| phe.Fasting_rs146622060 S13 | DIAPH1 | rs150916187 S4  | HIST1H2BK  | 4.14E-06 | 1           | 0.00210616  | 2.81E-15 | 1.14E-07    | 2.72E-11 |
| phe.Fasting_rs146622060 S13 | DIAPH1 | rs16894241 S4   | HIST1H2BK  | 3.73E-12 | 0.000152384 | 6.73E-09    | 7.18E-15 | 2.92E-07    | 6.39E-11 |

|              |                |        |               |     |             |          |             |             |          |             |          |
|--------------|----------------|--------|---------------|-----|-------------|----------|-------------|-------------|----------|-------------|----------|
| phe.Fasting_ | rs146622060S13 | DIAPH1 | rs34801978    | S3  | HOXB2       | 2.19E-06 | 1           | 0.00120758  | 2.24E-09 | 0.0911397   | 4.89E-06 |
| phe.Fasting_ | rs146622060S13 | DIAPH1 | rs4732511     | S13 | POR         | 9.61E-15 | 3.93E-07    | 2.45E-11    | 2.90E-06 | 1           | 2.84E-03 |
| phe.Fasting_ | rs146622060S13 | DIAPH1 | rs57503635    | S3  | NA          | 1.28E-16 | 5.23E-09    | 5.19E-13    | 7.18E-15 | 2.92E-07    | 6.39E-11 |
| phe.Fasting_ | rs146622060S13 | DIAPH1 | rs60011869    | S16 | NA          | 2.13E-06 | 1           | 0.00118391  | 1.84E-07 | 1           | 2.46E-04 |
| phe.Fasting_ | rs146622060S13 | DIAPH1 | rs6964407     | S7  | POR         | 3.32E-14 | 1.36E-06    | 8.04E-11    | 2.65E-06 | 1           | 2.63E-03 |
| phe.Fasting_ | rs146622060S13 | DIAPH1 | rs7004597     | S8  | NA          | 1.25E-15 | 5.12E-08    | 3.65E-12    | 5.36E-08 | 1           | 8.16E-05 |
| phe.Fasting_ | rs146622060S13 | DIAPH1 | rs7256517     | S7  | CYTH2       | 1.59E-16 | 6.48E-09    | 6.03E-13    | 1.01E-12 | 4.13E-05    | 4.74E-09 |
| phe.Fasting_ | rs146622060S13 | DIAPH1 | rs73283603    | S7  | ZWINT       | 4.49E-07 | 1           | 0.000297012 | 4.87E-08 | 1           | 7.49E-05 |
| phe.Fasting_ | rs146622060S13 | DIAPH1 | rs73392640    | S8  | POLR3B      | 4.58E-11 | 0.00187102  | 6.24E-08    | 1.10E-11 | 0.000446024 | 4.04E-08 |
| phe.Fasting_ | rs146622060S13 | DIAPH1 | rs73619637    | S8  | NA          | 2.00E-16 | 8.15E-09    | 6.95E-13    | 6.56E-08 | 1           | 9.80E-05 |
| phe.Fasting_ | rs146622060S13 | DIAPH1 | rs74627895    | S8  | TMEM64      | 1.64E-07 | 1           | 0.000118218 | 4.43E-09 | 0.180369    | 9.00E-06 |
| phe.Fasting_ | rs146622060S13 | DIAPH1 | rs74914207    | S24 | NA          | 2.89E-11 | 0.00117833  | 4.13E-08    | 1.71E-11 | 0.000696754 | 6.13E-08 |
| phe.Fasting_ | rs146622060S13 | DIAPH1 | rs75350765    | S5  | RCL1        | 2.03E-17 | 8.30E-10    | 1.43E-13    | 8.22E-09 | 0.334664    | 1.57E-05 |
| phe.Fasting_ | rs146622060S13 | DIAPH1 | rs75374128    | S5  | CNTLN       | 5.25E-06 | 1           | 0.00259743  | 1.90E-08 | 0.773981    | 3.28E-05 |
| phe.Fasting_ | rs146622060S13 | DIAPH1 | rs75506779    | S5  | TMCO3       | 1.04E-07 | 1           | 7.88E-05    | 2.35E-09 | 0.0955642   | 5.10E-06 |
| phe.Fasting_ | rs146622060S13 | DIAPH1 | rs75758702    | S24 | NA          | 1.04E-17 | 4.25E-10    | 9.89E-14    | 2.90E-11 | 0.00117848  | 9.92E-08 |
| phe.Fasting_ | rs146622060S13 | DIAPH1 | rs75864203    | S8  | CNTLN       | 5.25E-06 | 1           | 0.00259743  | 1.90E-08 | 0.773981    | 3.28E-05 |
| phe.Fasting_ | rs146622060S13 | DIAPH1 | rs75949566    | S5  | TMEM64      | 6.52E-07 | 1           | 0.000415514 | 1.56E-11 | 0.000636403 | 5.61E-08 |
| phe.Fasting_ | rs146622060S13 | DIAPH1 | rs76844308    | S8  | CNTLN       | 2.67E-06 | 1           | 0.00143908  | 1.85E-08 | 0.754334    | 3.21E-05 |
| phe.Fasting_ | rs146622060S13 | DIAPH1 | rs7763107     | S8  | FARS2       | 9.44E-17 | 3.86E-09    | 4.06E-13    | 1.67E-12 | 6.82E-05    | 7.43E-09 |
| phe.Fasting_ | rs146622060S13 | DIAPH1 | rs77798597    | S7  | KPNA3       | 5.05E-16 | 2.06E-08    | 1.59E-12    | 2.30E-14 | 9.36E-07    | 1.79E-10 |
| phe.Fasting_ | rs146622060S13 | DIAPH1 | rs77845645    | S21 | NA          | 3.35E-07 | 1           | 0.000229183 | 1.07E-11 | 0.000437137 | 3.97E-08 |
| phe.Fasting_ | rs146622060S13 | DIAPH1 | rs78353402    | S8  | AP3M2       | 1.25E-15 | 5.12E-08    | 3.65E-12    | 9.18E-08 | 1           | 1.31E-04 |
| phe.Fasting_ | rs146622060S13 | DIAPH1 | rs78516788    | S8  | SLC38A1     | 1.24E-06 | 1           | 0.000737575 | 2.73E-09 | 0.111147    | 5.83E-06 |
| phe.Fasting_ | rs146622060S13 | DIAPH1 | rs78697063    | S5  | MSI2        | 7.77E-20 | 3.17E-12    | 2.23E-14    | 1.49E-10 | 0.00608249  | 4.45E-07 |
| phe.Fasting_ | rs146622060S13 | DIAPH1 | rs78703708    | S7  | FAF2        | 7.40E-12 | 0.000302252 | 1.27E-08    | 7.23E-06 | 1           | 6.23E-03 |
| phe.Fasting_ | rs146622060S13 | DIAPH1 | rs78722272    | S5  | CNTLN       | 5.25E-06 | 1           | 0.00259743  | 1.95E-08 | 0.795481    | 3.36E-05 |
| phe.Fasting_ | rs146622060S13 | DIAPH1 | rs78736524    | S5  | KPNA3       | 5.05E-16 | 2.06E-08    | 1.59E-12    | 2.49E-14 | 1.01E-06    | 1.89E-10 |
| phe.Fasting_ | rs146622060S13 | DIAPH1 | rs78990344    | S2  | LOC10050631 | 5.56E-07 | 1           | 0.000361481 | 1.15E-11 | 0.000469077 | 4.23E-08 |
| phe.Fasting_ | rs146622060S13 | DIAPH1 | rs79781495    | S8  | KPNA3       | 5.05E-16 | 2.06E-08    | 1.59E-12    | 2.30E-14 | 9.36E-07    | 1.79E-10 |
| phe.Fasting_ | rs146622060S13 | DIAPH1 | rs80200953    | S8  | PPP2R5D     | 1.41E-17 | 5.76E-10    | 1.14E-13    | 8.95E-10 | 0.0364115   | 2.15E-06 |
| phe.Fasting_ | rs146622060S13 | DIAPH1 | rs80332465    | S5  | KPNA3       | 5.36E-16 | 2.19E-08    | 1.67E-12    | 2.47E-14 | 1.00E-06    | 1.88E-10 |
| phe.Fasting_ | rs146622060S13 | DIAPH1 | rs80334773    | S5  | KPNA3       | 5.36E-16 | 2.19E-08    | 1.67E-12    | 2.47E-14 | 1.00E-06    | 1.88E-10 |
| phe.Fasting_ | rs146622060S13 | DIAPH1 | rs891061      | S7  | POP4        | 6.59E-07 | 1.00E+00    | 4.20E-04    | 1.12E-05 | 1           | 8.91E-03 |
| phe.Fasting_ | rs146815317S5  | KPNA3  | rs140524622S7 |     | MRPL10      | 3.78E-08 | 1           | 3.18E-05    | 1.56E-16 | 6.34E-09    | 6.88E-12 |
| phe.Fasting_ | rs146815317S5  | KPNA3  | rs57503635    | S3  | NA          | 1.29E-15 | 5.25E-08    | 3.74E-12    | 4.33E-15 | 1.76E-07    | 4.03E-11 |
| phe.Fasting_ | rs146815317S5  | KPNA3  | rs7256517     | S7  | CYTH2       | 1.78E-05 | 1.00E+00    | 7.54E-03    | 1.17E-06 | 1           | 1.30E-03 |
| phe.Fasting_ | rs146815317S5  | KPNA3  | rs75506779    | S5  | TMCO3       | 2.52E-06 | 1.00E+00    | 1.37E-03    | 2.54E-15 | 1.03E-07    | 2.48E-11 |
| phe.Fasting_ | rs146878162S7  | DIAPH1 | rs111576333S5 |     | TMEM64      | 2.37E-06 | 1.00E+00    | 1.30E-03    | 5.87E-14 | 2.39E-06    | 3.99E-10 |
| phe.Fasting_ | rs146878162S7  | DIAPH1 | rs112089881S8 |     | ZFAND4      | 2.04E-17 | 8.32E-10    | 1.43E-13    | 1.09E-09 | 0.0445256   | 2.58E-06 |

|                           |        |                |           |          |             |             |          |             |          |
|---------------------------|--------|----------------|-----------|----------|-------------|-------------|----------|-------------|----------|
| phe.Fasting_rs146878162S7 | DIAPH1 | rs112091318S5  | TMEM64    | 7.32E-07 | 1           | 0.000459899 | 3.91E-08 | 1           | 6.13E-05 |
| phe.Fasting_rs146878162S7 | DIAPH1 | rs114334325S7  | AP3M2     | 4.51E-15 | 1.84E-07    | 1.18E-11    | 3.87E-07 | 1           | 4.75E-04 |
| phe.Fasting_rs146878162S7 | DIAPH1 | rs114394395S7  | AP3M2     | 4.81E-15 | 1.97E-07    | 1.25E-11    | 3.87E-07 | 1           | 4.75E-04 |
| phe.Fasting_rs146878162S7 | DIAPH1 | rs114565620S8  | RCL1      | 1.82E-16 | 7.42E-09    | 6.37E-13    | 3.70E-08 | 1           | 5.84E-05 |
| phe.Fasting_rs146878162S7 | DIAPH1 | rs115083290S19 | NA        | 4.38E-16 | 1.79E-08    | 1.40E-12    | 1.42E-08 | 0.576679    | 2.53E-05 |
| phe.Fasting_rs146878162S7 | DIAPH1 | rs11524145 S5  | CDK6      | 7.80E-07 | 1.00E+00    | 4.86E-04    | 7.89E-06 | 1           | 6.69E-03 |
| phe.Fasting_rs146878162S7 | DIAPH1 | rs115752779S19 | NA        | 4.38E-16 | 1.79E-08    | 1.40E-12    | 1.42E-08 | 0.576679    | 2.53E-05 |
| phe.Fasting_rs146878162S7 | DIAPH1 | rs115787552S5  | KPNA3     | 2.97E-15 | 1.21E-07    | 8.14E-12    | 1.18E-13 | 4.80E-06    | 7.06E-10 |
| phe.Fasting_rs146878162S7 | DIAPH1 | rs115888477S8  | NA        | 2.03E-14 | 8.28E-07    | 5.02E-11    | 2.21E-14 | 8.99E-07    | 1.73E-10 |
| phe.Fasting_rs146878162S7 | DIAPH1 | rs116011837S9  | BRD2      | 4.89E-11 | 0.00199774  | 6.62E-08    | 4.07E-14 | 1.66E-06    | 2.85E-10 |
| phe.Fasting_rs146878162S7 | DIAPH1 | rs116079984S8  | KPNA3     | 2.97E-15 | 1.21E-07    | 8.14E-12    | 1.24E-13 | 5.04E-06    | 7.34E-10 |
| phe.Fasting_rs146878162S7 | DIAPH1 | rs116120727S9  | BRD2      | 4.89E-11 | 2.00E-03    | 6.62E-08    | 4.07E-14 | 1.66E-06    | 2.85E-10 |
| phe.Fasting_rs146878162S7 | DIAPH1 | rs116406581S2  | NA        | 1.81E-14 | 7.39E-07    | 4.52E-11    | 2.35E-07 | 1           | 3.05E-04 |
| phe.Fasting_rs146878162S7 | DIAPH1 | rs116548615S8  | TMEM45B   | 1.73E-16 | 7.06E-09    | 6.15E-13    | 8.70E-12 | 0.000354153 | 3.26E-08 |
| phe.Fasting_rs146878162S7 | DIAPH1 | rs116696844S3  | AP3M2     | 6.92E-15 | 2.83E-07    | 1.78E-11    | 3.87E-07 | 1           | 4.75E-04 |
| phe.Fasting_rs146878162S7 | DIAPH1 | rs11989304 S4  | TMEM64    | 2.37E-06 | 1.00E+00    | 1.30E-03    | 6.78E-11 | 0.00276161  | 2.13E-07 |
| phe.Fasting_rs146878162S7 | DIAPH1 | rs140524622S7  | MRPL10    | 1.08E-16 | 4.41E-09    | 4.54E-13    | 7.35E-06 | 1           | 6.31E-03 |
| phe.Fasting_rs146878162S7 | DIAPH1 | rs146815317S5  | KPNA3     | 2.97E-15 | 1.21E-07    | 8.14E-12    | 1.18E-13 | 4.80E-06    | 7.06E-10 |
| phe.Fasting_rs146878162S7 | DIAPH1 | rs150117838S8  | KPNA3     | 2.97E-15 | 1.21E-07    | 8.14E-12    | 1.09E-13 | 4.44E-06    | 6.79E-10 |
| phe.Fasting_rs146878162S7 | DIAPH1 | rs150916187S4  | HIST1H2BK | 1.38E-05 | 1           | 0.00605332  | 1.37E-14 | 5.59E-07    | 1.16E-10 |
| phe.Fasting_rs146878162S7 | DIAPH1 | rs16894241 S4  | HIST1H2BK | 1.99E-11 | 0.000812315 | 2.96E-08    | 3.44E-14 | 1.40E-06    | 2.50E-10 |
| phe.Fasting_rs146878162S7 | DIAPH1 | rs2032062 S8   | NA        | 1.22E-14 | 4.98E-07    | 3.09E-11    | 8.48E-06 | 1           | 7.14E-03 |
| phe.Fasting_rs146878162S7 | DIAPH1 | rs2153597 S8   | ZNF438    | 5.51E-11 | 0.00224928  | 7.42E-08    | 4.52E-09 | 0.183916    | 9.08E-06 |
| phe.Fasting_rs146878162S7 | DIAPH1 | rs2835656 S7   | TTC3      | 3.01E-10 | 0.0122766   | 3.60E-07    | 9.12E-06 | 1           | 7.57E-03 |
| phe.Fasting_rs146878162S7 | DIAPH1 | rs34801978 S3  | HOXB2     | 1.23E-05 | 1           | 0.00545724  | 1.03E-08 | 0.419057    | 1.90E-05 |
| phe.Fasting_rs146878162S7 | DIAPH1 | rs352346 S3    | GRPEL2    | 1.85E-11 | 0.000754995 | 2.78E-08    | 8.42E-06 | 1           | 7.10E-03 |
| phe.Fasting_rs146878162S7 | DIAPH1 | rs3750898 S8   | DCLRE1A   | 2.29E-05 | 1           | 0.0093502   | 8.76E-06 | 1           | 7.32E-03 |
| phe.Fasting_rs146878162S7 | DIAPH1 | rs4732511 S13  | POR       | 2.30E-15 | 9.39E-08    | 6.48E-12    | 9.65E-06 | 1           | 7.93E-03 |
| phe.Fasting_rs146878162S7 | DIAPH1 | rs57503635 S3  | NA        | 6.34E-16 | 2.59E-08    | 1.95E-12    | 3.17E-14 | 1.29E-06    | 2.34E-10 |
| phe.Fasting_rs146878162S7 | DIAPH1 | rs58905476 S7  | TTC3      | 3.29E-10 | 0.0134302   | 3.90E-07    | 9.79E-06 | 1           | 8.01E-03 |
| phe.Fasting_rs146878162S7 | DIAPH1 | rs60011869 S16 | NA        | 1.04E-05 | 1           | 0.00472365  | 8.16E-10 | 0.0332257   | 1.98E-06 |
| phe.Fasting_rs146878162S7 | DIAPH1 | rs6964407 S7   | POR       | 7.55E-15 | 3.08E-07    | 1.94E-11    | 8.91E-06 | 1           | 7.43E-03 |
| phe.Fasting_rs146878162S7 | DIAPH1 | rs7004597 S8   | NA        | 4.51E-15 | 1.84E-07    | 1.18E-11    | 2.34E-07 | 1           | 3.04E-04 |
| phe.Fasting_rs146878162S7 | DIAPH1 | rs7256517 S7   | CYTH2     | 1.04E-15 | 4.24E-08    | 3.06E-12    | 4.82E-12 | 0.000196022 | 1.91E-08 |
| phe.Fasting_rs146878162S7 | DIAPH1 | rs73283603 S7  | ZWINT     | 1.90E-06 | 1           | 0.0010688   | 2.03E-07 | 1           | 2.68E-04 |
| phe.Fasting_rs146878162S7 | DIAPH1 | rs73392640 S8  | POLR3B    | 2.02E-10 | 0.00826001  | 2.49E-07    | 5.19E-11 | 0.00211214  | 1.67E-07 |
| phe.Fasting_rs146878162S7 | DIAPH1 | rs734069 S19   | NA        | 2.06E-08 | 0.839421    | 1.81E-05    | 6.71E-10 | 0.0272994   | 1.68E-06 |
| phe.Fasting_rs146878162S7 | DIAPH1 | rs73619637 S8  | NA        | 1.44E-15 | 5.89E-08    | 4.14E-12    | 2.05E-10 | 0.00833668  | 5.78E-07 |
| phe.Fasting_rs146878162S7 | DIAPH1 | rs74627895 S8  | TMEM64    | 7.32E-07 | 1           | 0.000459899 | 2.03E-08 | 0.828094    | 3.48E-05 |
| phe.Fasting_rs146878162S7 | DIAPH1 | rs74914207 S24 | NA        | 1.37E-10 | 0.00558626  | 1.73E-07    | 9.12E-11 | 0.0037135   | 2.80E-07 |

|                           |        |            |             |            |             |            |             |             |             |            |          |
|---------------------------|--------|------------|-------------|------------|-------------|------------|-------------|-------------|-------------|------------|----------|
| phe.Fasting_rs146878162S7 | DIAPH1 | rs75350765 | S5          | RCL1       | 1.82E-16    | 7.42E-09   | 6.37E-13    | 3.70E-08    | 1           | 5.84E-05   |          |
| phe.Fasting_rs146878162S7 | DIAPH1 | rs75374128 | S5          | CNTLN      | 1.47E-16    | 6.01E-09   | 5.72E-13    | 1.01E-07    | 1           | 1.42E-04   |          |
| phe.Fasting_rs146878162S7 | DIAPH1 | rs75506779 | S5          | TMCO3      | 5.55E-07    | 1          | 0.000360863 | 1.10E-08    | 0.449707    | 2.03E-05   |          |
| phe.Fasting_rs146878162S7 | DIAPH1 | rs75758702 | S24         | NA         | 7.02E-17    | 2.87E-09   | 3.16E-13    | 1.57E-10    | 0.00638323  | 4.59E-07   |          |
| phe.Fasting_rs146878162S7 | DIAPH1 | rs75864203 | S8          | CNTLN      | 1.47E-16    | 6.01E-09   | 5.72E-13    | 1.01E-07    | 1           | 1.42E-04   |          |
| phe.Fasting_rs146878162S7 | DIAPH1 | rs75949566 | S5          | TMEM64     | 2.76E-06    | 1          | 0.001473    | 8.48E-11    | 0.00345267  | 2.62E-07   |          |
| phe.Fasting_rs146878162S7 | DIAPH1 | rs76844308 | S8          | CNTLN      | 7.68E-17    | 3.14E-09   | 3.41E-13    | 9.52E-08    | 1           | 1.35E-04   |          |
| phe.Fasting_rs146878162S7 | DIAPH1 | rs7763107  | S8          | FARS2      | 5.78E-16    | 2.36E-08   | 1.79E-12    | 9.23E-12    | 0.000375564 | 3.44E-08   |          |
| phe.Fasting_rs146878162S7 | DIAPH1 | rs77798597 | S7          | KPNA3      | 2.97E-15    | 1.21E-07   | 8.14E-12    | 1.09E-13    | 4.44E-06    | 6.79E-10   |          |
| phe.Fasting_rs146878162S7 | DIAPH1 | rs77845645 | S21         | NA         | 1.53E-06    | 1          | 0.000888475 | 4.20E-11    | 0.00170882  | 1.38E-07   |          |
| phe.Fasting_rs146878162S7 | DIAPH1 | rs78353402 | S8          | AP3M2      | 4.51E-15    | 1.84E-07   | 1.18E-11    | 3.87E-07    | 1           | 4.75E-04   |          |
| phe.Fasting_rs146878162S7 | DIAPH1 | rs78516788 | S8          | SLC38A1    | 2.75E-11    | 0.00112269 | 3.94E-08    | 2.44E-10    | 0.00992686  | 6.74E-07   |          |
| phe.Fasting_rs146878162S7 | DIAPH1 | rs78697063 | S5          | MSI2       | 8.23E-19    | 3.36E-11   | 2.70E-14    | 6.84E-10    | 0.0278369   | 1.70E-06   |          |
| phe.Fasting_rs146878162S7 | DIAPH1 | rs78722272 | S5          | CNTLN      | 1.47E-16    | 6.01E-09   | 5.72E-13    | 1.05E-07    | 1           | 1.48E-04   |          |
| phe.Fasting_rs146878162S7 | DIAPH1 | rs78736524 | S5          | KPNA3      | 2.97E-15    | 1.21E-07   | 8.14E-12    | 1.18E-13    | 4.80E-06    | 7.06E-10   |          |
| phe.Fasting_rs146878162S7 | DIAPH1 | rs78990344 | S2          | LOC1005063 | 2.37E-06    | 1          | 0.00129547  | 6.78E-11    | 0.00276161  | 2.13E-07   |          |
| phe.Fasting_rs146878162S7 | DIAPH1 | rs79781495 | S8          | KPNA3      | 2.97E-15    | 1.21E-07   | 8.14E-12    | 1.09E-13    | 4.44E-06    | 6.79E-10   |          |
| phe.Fasting_rs146878162S7 | DIAPH1 | rs79886603 | S15         | NA         | 8.71E-08    | 1          | 6.74E-05    | 4.66E-07    | 1           | 5.59E-04   |          |
| phe.Fasting_rs146878162S7 | DIAPH1 | rs80200953 | S8          | PPP2R5D    | 8.49E-17    | 3.47E-09   | 3.69E-13    | 3.65E-09    | 0.148399    | 7.55E-06   |          |
| phe.Fasting_rs146878162S7 | DIAPH1 | rs80332465 | S5          | KPNA3      | 3.13E-15    | 1.28E-07   | 8.51E-12    | 1.17E-13    | 4.77E-06    | 7.06E-10   |          |
| phe.Fasting_rs146878162S7 | DIAPH1 | rs80334773 | S5          | KPNA3      | 3.13E-15    | 1.28E-07   | 8.51E-12    | 1.17E-13    | 4.77E-06    | 7.06E-10   |          |
| phe.Fasting_rs1470889     | S5     | ZC3H3      | rs114565620 | S8         | RCL1        | 2.92E-07   | 1.00E+00    | 2.02E-04    | 7.02E-12    | 0.00028576 | 2.70E-08 |
| phe.Fasting_rs1470889     | S5     | ZC3H3      | rs139070959 | S8         | RPN2        | 1.38E-18   | 5.64E-11    | 3.38E-14    | 5.20E-15    | 2.12E-07   | 4.77E-11 |
| phe.Fasting_rs1470889     | S5     | ZC3H3      | rs145412529 | S8         | "RBL1,RPS3A | 7.67E-19   | 3.13E-11    | 2.70E-14    | 6.02E-15    | 2.45E-07   | 5.46E-11 |
| phe.Fasting_rs1470889     | S5     | ZC3H3      | rs75350765  | S5         | RCL1        | 2.92E-07   | 1           | 2.02E-04    | 7.02E-12    | 0.00028576 | 2.70E-08 |
| phe.Fasting_rs1470889     | S5     | ZC3H3      | rs75374128  | S5         | CNTLN       | 3.57E-11   | 0.00145818  | 4.97E-08    | 1.16E-05    | 1          | 9.15E-03 |
| phe.Fasting_rs1470889     | S5     | ZC3H3      | rs75864203  | S8         | CNTLN       | 3.57E-11   | 0.00145818  | 4.97E-08    | 1.16E-05    | 1          | 9.15E-03 |
| phe.Fasting_rs1470889     | S5     | ZC3H3      | rs76844308  | S8         | CNTLN       | 4.44E-13   | 1.81E-05    | 9.40E-10    | 6.92E-06    | 1          | 6.01E-03 |
| phe.Fasting_rs1470889     | S5     | ZC3H3      | rs78516788  | S8         | SLC38A1     | 1.03E-07   | 1           | 7.84E-05    | 2.03E-07    | 1          | 2.69E-04 |
| phe.Fasting_rs1470889     | S5     | ZC3H3      | rs78722272  | S5         | CNTLN       | 3.57E-11   | 0.00145818  | 4.97E-08    | 1.23E-05    | 1          | 9.59E-03 |
| phe.Fasting_rs1470889     | S5     | ZC3H3      | rs79886603  | S15        | NA          | 2.40E-06   | 1           | 0.00130558  | 5.07E-07    | 1          | 6.05E-04 |
| phe.Fasting_rs1470890     | S5     | ZC3H3      | rs114565620 | S8         | RCL1        | 2.92E-07   | 1           | 0.000201845 | 7.02E-12    | 0.00028576 | 2.70E-08 |
| phe.Fasting_rs1470890     | S5     | ZC3H3      | rs139070959 | S8         | RPN2        | 1.38E-18   | 5.64E-11    | 3.38E-14    | 5.20E-15    | 2.12E-07   | 4.77E-11 |
| phe.Fasting_rs1470890     | S5     | ZC3H3      | rs145412529 | S8         | "RBL1,RPS3A | 7.67E-19   | 3.13E-11    | 2.70E-14    | 6.02E-15    | 2.45E-07   | 5.46E-11 |
| phe.Fasting_rs1470890     | S5     | ZC3H3      | rs75350765  | S5         | RCL1        | 2.92E-07   | 1           | 0.000201845 | 7.02E-12    | 0.00028576 | 2.70E-08 |
| phe.Fasting_rs1470890     | S5     | ZC3H3      | rs75374128  | S5         | CNTLN       | 3.57E-11   | 0.00145818  | 4.97E-08    | 1.16E-05    | 1          | 9.15E-03 |
| phe.Fasting_rs1470890     | S5     | ZC3H3      | rs75864203  | S8         | CNTLN       | 3.57E-11   | 0.00145818  | 4.97E-08    | 1.16E-05    | 1          | 9.15E-03 |
| phe.Fasting_rs1470890     | S5     | ZC3H3      | rs76844308  | S8         | CNTLN       | 4.44E-13   | 1.81E-05    | 9.40E-10    | 6.92E-06    | 1          | 6.01E-03 |
| phe.Fasting_rs1470890     | S5     | ZC3H3      | rs78516788  | S8         | SLC38A1     | 1.03E-07   | 1           | 7.84E-05    | 2.03E-07    | 1          | 2.69E-04 |
| phe.Fasting_rs1470890     | S5     | ZC3H3      | rs78722272  | S5         | CNTLN       | 3.57E-11   | 0.00145818  | 4.97E-08    | 1.23E-05    | 1          | 9.59E-03 |

|                         |    |        |             |     |           |          |             |             |          |             |          |
|-------------------------|----|--------|-------------|-----|-----------|----------|-------------|-------------|----------|-------------|----------|
| phe.Fasting_rs1470890   | S5 | ZC3H3  | rs79886603  | S15 | NA        | 2.40E-06 | 1           | 0.00130558  | 5.07E-07 | 1           | 6.05E-04 |
| phe.Fasting_rs147314451 | S8 | DIAPH1 | rs111576333 | S5  | TMEM64    | 2.37E-06 | 1           | 0.00129547  | 5.87E-14 | 2.39E-06    | 3.99E-10 |
| phe.Fasting_rs147314451 | S8 | DIAPH1 | rs112089881 | S8  | ZFAND4    | 2.04E-17 | 8.32E-10    | 1.43E-13    | 1.09E-09 | 0.0445256   | 2.58E-06 |
| phe.Fasting_rs147314451 | S8 | DIAPH1 | rs112091318 | S5  | TMEM64    | 7.32E-07 | 1           | 0.000459899 | 3.91E-08 | 1           | 6.13E-05 |
| phe.Fasting_rs147314451 | S8 | DIAPH1 | rs114334325 | S7  | AP3M2     | 4.51E-15 | 1.84E-07    | 1.18E-11    | 3.87E-07 | 1           | 4.75E-04 |
| phe.Fasting_rs147314451 | S8 | DIAPH1 | rs114394395 | S7  | AP3M2     | 4.81E-15 | 1.97E-07    | 1.25E-11    | 3.87E-07 | 1           | 4.75E-04 |
| phe.Fasting_rs147314451 | S8 | DIAPH1 | rs114565620 | S8  | RCL1      | 1.82E-16 | 7.42E-09    | 6.37E-13    | 3.70E-08 | 1           | 5.84E-05 |
| phe.Fasting_rs147314451 | S8 | DIAPH1 | rs115083290 | S19 | NA        | 4.38E-16 | 1.79E-08    | 1.40E-12    | 1.42E-08 | 0.576679    | 2.53E-05 |
| phe.Fasting_rs147314451 | S8 | DIAPH1 | rs11524145  | S5  | CDK6      | 7.80E-07 | 1           | 0.000486356 | 7.89E-06 | 1           | 6.69E-03 |
| phe.Fasting_rs147314451 | S8 | DIAPH1 | rs115752779 | S19 | NA        | 4.38E-16 | 1.79E-08    | 1.40E-12    | 1.42E-08 | 0.576679    | 2.53E-05 |
| phe.Fasting_rs147314451 | S8 | DIAPH1 | rs115787552 | S5  | KPNA3     | 2.97E-15 | 1.21E-07    | 8.14E-12    | 1.18E-13 | 4.80E-06    | 7.06E-10 |
| phe.Fasting_rs147314451 | S8 | DIAPH1 | rs115888477 | S8  | NA        | 2.03E-14 | 8.28E-07    | 5.02E-11    | 2.21E-14 | 8.99E-07    | 1.73E-10 |
| phe.Fasting_rs147314451 | S8 | DIAPH1 | rs116011837 | S9  | BRD2      | 4.89E-11 | 2.00E-03    | 6.62E-08    | 4.07E-14 | 1.66E-06    | 2.85E-10 |
| phe.Fasting_rs147314451 | S8 | DIAPH1 | rs116079984 | S8  | KPNA3     | 2.97E-15 | 1.21E-07    | 8.14E-12    | 1.24E-13 | 5.04E-06    | 7.34E-10 |
| phe.Fasting_rs147314451 | S8 | DIAPH1 | rs116120727 | S9  | BRD2      | 4.89E-11 | 0.00199774  | 6.62E-08    | 4.07E-14 | 1.66E-06    | 2.85E-10 |
| phe.Fasting_rs147314451 | S8 | DIAPH1 | rs116406581 | S2  | NA        | 1.81E-14 | 7.39E-07    | 4.52E-11    | 2.35E-07 | 1           | 3.05E-04 |
| phe.Fasting_rs147314451 | S8 | DIAPH1 | rs116548615 | S8  | TMEM45B   | 1.73E-16 | 7.06E-09    | 6.15E-13    | 8.70E-12 | 0.000354153 | 3.26E-08 |
| phe.Fasting_rs147314451 | S8 | DIAPH1 | rs116696844 | S3  | AP3M2     | 6.92E-15 | 2.83E-07    | 1.78E-11    | 3.87E-07 | 1           | 4.75E-04 |
| phe.Fasting_rs147314451 | S8 | DIAPH1 | rs11989304  | S4  | TMEM64    | 2.37E-06 | 1           | 1.30E-03    | 6.78E-11 | 0.00276161  | 2.13E-07 |
| phe.Fasting_rs147314451 | S8 | DIAPH1 | rs140524622 | S7  | MRPL13    | 1.08E-16 | 4.41E-09    | 4.54E-13    | 7.35E-06 | 1           | 6.31E-03 |
| phe.Fasting_rs147314451 | S8 | DIAPH1 | rs146815317 | S5  | KPNA3     | 2.97E-15 | 1.21E-07    | 8.14E-12    | 1.18E-13 | 4.80E-06    | 7.06E-10 |
| phe.Fasting_rs147314451 | S8 | DIAPH1 | rs150117838 | S8  | KPNA3     | 2.97E-15 | 1.21E-07    | 8.14E-12    | 1.09E-13 | 4.44E-06    | 6.79E-10 |
| phe.Fasting_rs147314451 | S8 | DIAPH1 | rs150916187 | S4  | HIST1H2BK | 1.38E-05 | 1           | 6.05E-03    | 1.37E-14 | 5.59E-07    | 1.16E-10 |
| phe.Fasting_rs147314451 | S8 | DIAPH1 | rs16894241  | S4  | HIST1H2BK | 1.99E-11 | 0.000812315 | 2.96E-08    | 3.44E-14 | 1.40E-06    | 2.50E-10 |
| phe.Fasting_rs147314451 | S8 | DIAPH1 | rs2032062   | S8  | NA        | 1.22E-14 | 4.98E-07    | 3.09E-11    | 8.48E-06 | 1           | 7.14E-03 |
| phe.Fasting_rs147314451 | S8 | DIAPH1 | rs2153597   | S8  | ZNF438    | 5.51E-11 | 0.00224928  | 7.42E-08    | 4.52E-09 | 0.183916    | 9.08E-06 |
| phe.Fasting_rs147314451 | S8 | DIAPH1 | rs2835656   | S7  | TTC3      | 3.01E-10 | 0.0122766   | 3.60E-07    | 9.12E-06 | 1           | 7.57E-03 |
| phe.Fasting_rs147314451 | S8 | DIAPH1 | rs34801978  | S3  | HOXB2     | 1.23E-05 | 1           | 0.00545724  | 1.03E-08 | 0.419057    | 1.90E-05 |
| phe.Fasting_rs147314451 | S8 | DIAPH1 | rs352346    | S3  | GRPEL2    | 1.85E-11 | 0.000754995 | 2.78E-08    | 8.42E-06 | 1           | 7.10E-03 |
| phe.Fasting_rs147314451 | S8 | DIAPH1 | rs3750898   | S8  | DCLRE1A   | 2.29E-05 | 1           | 0.0093502   | 8.76E-06 | 1           | 7.32E-03 |
| phe.Fasting_rs147314451 | S8 | DIAPH1 | rs4732511   | S13 | POR       | 2.30E-15 | 9.39E-08    | 6.48E-12    | 9.65E-06 | 1           | 7.93E-03 |
| phe.Fasting_rs147314451 | S8 | DIAPH1 | rs57503635  | S3  | NA        | 6.34E-16 | 2.59E-08    | 1.95E-12    | 3.17E-14 | 1.29E-06    | 2.34E-10 |
| phe.Fasting_rs147314451 | S8 | DIAPH1 | rs58905476  | S7  | TTC3      | 3.29E-10 | 1.34E-02    | 3.90E-07    | 9.79E-06 | 1           | 8.01E-03 |
| phe.Fasting_rs147314451 | S8 | DIAPH1 | rs60011869  | S16 | NA        | 1.04E-05 | 1.00E+00    | 4.72E-03    | 8.16E-10 | 0.0332257   | 1.98E-06 |
| phe.Fasting_rs147314451 | S8 | DIAPH1 | rs6964407   | S7  | POR       | 7.55E-15 | 3.08E-07    | 1.94E-11    | 8.91E-06 | 1           | 7.43E-03 |
| phe.Fasting_rs147314451 | S8 | DIAPH1 | rs7004597   | S8  | NA        | 4.51E-15 | 1.84E-07    | 1.18E-11    | 2.34E-07 | 1           | 3.04E-04 |
| phe.Fasting_rs147314451 | S8 | DIAPH1 | rs7256517   | S7  | CYTH2     | 1.04E-15 | 4.24E-08    | 3.06E-12    | 4.82E-12 | 0.000196022 | 1.91E-08 |
| phe.Fasting_rs147314451 | S8 | DIAPH1 | rs73283603  | S7  | ZWINT     | 1.90E-06 | 1.00E+00    | 1.07E-03    | 2.03E-07 | 1           | 2.68E-04 |
| phe.Fasting_rs147314451 | S8 | DIAPH1 | rs73392640  | S8  | POLR3B    | 2.02E-10 | 0.00826001  | 2.49E-07    | 5.19E-11 | 0.00211214  | 1.67E-07 |
| phe.Fasting_rs147314451 | S8 | DIAPH1 | rs734069    | S19 | NA        | 2.06E-08 | 0.839421    | 1.81E-05    | 6.71E-10 | 0.0272994   | 1.68E-06 |

|                           |        |             |     |             |          |            |             |          |             |          |
|---------------------------|--------|-------------|-----|-------------|----------|------------|-------------|----------|-------------|----------|
| phe.Fasting_rs147314451S8 | DIAPH1 | rs73619637  | S8  | NA          | 1.44E-15 | 5.89E-08   | 4.14E-12    | 2.05E-10 | 0.00833668  | 5.78E-07 |
| phe.Fasting_rs147314451S8 | DIAPH1 | rs74627895  | S8  | TMEM64      | 7.32E-07 | 1          | 4.60E-04    | 2.03E-08 | 0.828094    | 3.48E-05 |
| phe.Fasting_rs147314451S8 | DIAPH1 | rs74914207  | S24 | NA          | 1.37E-10 | 0.00558626 | 1.73E-07    | 9.12E-11 | 0.0037135   | 2.80E-07 |
| phe.Fasting_rs147314451S8 | DIAPH1 | rs75350765  | S5  | RCL1        | 1.82E-16 | 7.42E-09   | 6.37E-13    | 3.70E-08 | 1           | 5.84E-05 |
| phe.Fasting_rs147314451S8 | DIAPH1 | rs75374128  | S5  | CNTLN       | 1.47E-16 | 6.01E-09   | 5.72E-13    | 1.01E-07 | 1           | 1.42E-04 |
| phe.Fasting_rs147314451S8 | DIAPH1 | rs75506779  | S5  | TMCO3       | 5.55E-07 | 1          | 3.61E-04    | 1.10E-08 | 0.449707    | 2.03E-05 |
| phe.Fasting_rs147314451S8 | DIAPH1 | rs75758702  | S24 | NA          | 7.02E-17 | 2.87E-09   | 3.16E-13    | 1.57E-10 | 0.00638323  | 4.59E-07 |
| phe.Fasting_rs147314451S8 | DIAPH1 | rs75864203  | S8  | CNTLN       | 1.47E-16 | 6.01E-09   | 5.72E-13    | 1.01E-07 | 1           | 1.42E-04 |
| phe.Fasting_rs147314451S8 | DIAPH1 | rs75949566  | S5  | TMEM64      | 2.76E-06 | 1          | 1.47E-03    | 8.48E-11 | 0.00345267  | 2.62E-07 |
| phe.Fasting_rs147314451S8 | DIAPH1 | rs76844308  | S8  | CNTLN       | 7.68E-17 | 3.14E-09   | 3.41E-13    | 9.52E-08 | 1           | 1.35E-04 |
| phe.Fasting_rs147314451S8 | DIAPH1 | rs7763107   | S8  | FARS2       | 5.78E-16 | 2.36E-08   | 1.79E-12    | 9.23E-12 | 0.000375564 | 3.44E-08 |
| phe.Fasting_rs147314451S8 | DIAPH1 | rs77798597  | S7  | KPNA3       | 2.97E-15 | 1.21E-07   | 8.14E-12    | 1.09E-13 | 4.44E-06    | 6.79E-10 |
| phe.Fasting_rs147314451S8 | DIAPH1 | rs77845645  | S21 | NA          | 1.53E-06 | 1          | 8.88E-04    | 4.20E-11 | 0.00170882  | 1.38E-07 |
| phe.Fasting_rs147314451S8 | DIAPH1 | rs78353402  | S8  | AP3M2       | 4.51E-15 | 1.84E-07   | 1.18E-11    | 3.87E-07 | 1           | 4.75E-04 |
| phe.Fasting_rs147314451S8 | DIAPH1 | rs78516788  | S8  | SLC38A1     | 2.75E-11 | 0.00112269 | 3.94E-08    | 2.44E-10 | 0.00992686  | 6.74E-07 |
| phe.Fasting_rs147314451S8 | DIAPH1 | rs78697063  | S5  | MSI2        | 8.23E-19 | 3.36E-11   | 2.70E-14    | 6.84E-10 | 0.0278369   | 1.70E-06 |
| phe.Fasting_rs147314451S8 | DIAPH1 | rs78722272  | S5  | CNTLN       | 1.47E-16 | 6.01E-09   | 5.72E-13    | 1.05E-07 | 1           | 1.48E-04 |
| phe.Fasting_rs147314451S8 | DIAPH1 | rs78736524  | S5  | KPNA3       | 2.97E-15 | 1.21E-07   | 8.14E-12    | 1.18E-13 | 4.80E-06    | 7.06E-10 |
| phe.Fasting_rs147314451S8 | DIAPH1 | rs78990344  | S2  | LOC10050631 | 2.37E-06 | 1.00E+00   | 1.30E-03    | 6.78E-11 | 0.00276161  | 2.13E-07 |
| phe.Fasting_rs147314451S8 | DIAPH1 | rs79781495  | S8  | KPNA3       | 2.97E-15 | 1.21E-07   | 8.14E-12    | 1.09E-13 | 4.44E-06    | 6.79E-10 |
| phe.Fasting_rs147314451S8 | DIAPH1 | rs79886603  | S15 | NA          | 8.71E-08 | 1.00E+00   | 6.74E-05    | 4.66E-07 | 1           | 5.59E-04 |
| phe.Fasting_rs147314451S8 | DIAPH1 | rs80200953  | S8  | PPP2R5D     | 8.49E-17 | 3.47E-09   | 3.69E-13    | 3.65E-09 | 0.148399    | 7.55E-06 |
| phe.Fasting_rs147314451S8 | DIAPH1 | rs80332465  | S5  | KPNA3       | 3.13E-15 | 1.28E-07   | 8.51E-12    | 1.17E-13 | 4.77E-06    | 7.06E-10 |
| phe.Fasting_rs147314451S8 | DIAPH1 | rs80334773  | S5  | KPNA3       | 3.13E-15 | 1.28E-07   | 8.51E-12    | 1.17E-13 | 4.77E-06    | 7.06E-10 |
| phe.Fasting_rs147417996S7 | DIAPH1 | rs111576333 | S5  | TMEM64      | 5.56E-07 | 1          | 0.000361481 | 8.30E-15 | 3.38E-07    | 7.30E-11 |
| phe.Fasting_rs147417996S7 | DIAPH1 | rs112089881 | S8  | ZFAND4      | 3.24E-18 | 1.32E-10   | 5.45E-14    | 2.00E-10 | 0.0081353   | 5.68E-07 |
| phe.Fasting_rs147417996S7 | DIAPH1 | rs112091318 | S5  | TMEM64      | 1.64E-07 | 1          | 1.18E-04    | 9.23E-09 | 0.375672    | 1.74E-05 |
| phe.Fasting_rs147417996S7 | DIAPH1 | rs114334325 | S7  | AP3M2       | 1.25E-15 | 5.12E-08   | 3.65E-12    | 9.18E-08 | 1           | 1.31E-04 |
| phe.Fasting_rs147417996S7 | DIAPH1 | rs114394395 | S7  | AP3M2       | 1.33E-15 | 5.44E-08   | 3.85E-12    | 9.18E-08 | 1           | 1.31E-04 |
| phe.Fasting_rs147417996S7 | DIAPH1 | rs114565620 | S8  | RCL1        | 2.03E-17 | 8.30E-10   | 1.43E-13    | 8.22E-09 | 0.334664    | 1.57E-05 |
| phe.Fasting_rs147417996S7 | DIAPH1 | rs115083290 | S19 | NA          | 8.17E-17 | 3.34E-09   | 3.58E-13    | 2.95E-09 | 0.120139    | 6.26E-06 |
| phe.Fasting_rs147417996S7 | DIAPH1 | rs115752779 | S19 | NA          | 8.17E-17 | 3.34E-09   | 3.58E-13    | 2.95E-09 | 0.120139    | 6.26E-06 |
| phe.Fasting_rs147417996S7 | DIAPH1 | rs115787552 | S5  | KPNA3       | 5.05E-16 | 2.06E-08   | 1.59E-12    | 2.49E-14 | 1.01E-06    | 1.89E-10 |
| phe.Fasting_rs147417996S7 | DIAPH1 | rs115888477 | S8  | NA          | 3.68E-15 | 1.50E-07   | 9.90E-12    | 4.39E-15 | 1.79E-07    | 4.08E-11 |
| phe.Fasting_rs147417996S7 | DIAPH1 | rs116011837 | S9  | BRD2        | 9.60E-12 | 3.92E-04   | 1.53E-08    | 9.42E-15 | 3.84E-07    | 8.18E-11 |
| phe.Fasting_rs147417996S7 | DIAPH1 | rs116079984 | S8  | KPNA3       | 5.05E-16 | 2.06E-08   | 1.59E-12    | 2.73E-14 | 1.11E-06    | 2.06E-10 |
| phe.Fasting_rs147417996S7 | DIAPH1 | rs116120727 | S9  | BRD2        | 9.60E-12 | 3.92E-04   | 1.53E-08    | 9.42E-15 | 3.84E-07    | 8.18E-11 |
| phe.Fasting_rs147417996S7 | DIAPH1 | rs116406581 | S2  | NA          | 5.24E-15 | 2.14E-07   | 1.36E-11    | 5.55E-08 | 1           | 8.42E-05 |
| phe.Fasting_rs147417996S7 | DIAPH1 | rs116548615 | S8  | TMEM45B     | 2.95E-17 | 1.21E-09   | 1.69E-13    | 1.84E-12 | 7.48E-05    | 8.04E-09 |
| phe.Fasting_rs147417996S7 | DIAPH1 | rs116696844 | S3  | AP3M2       | 1.90E-15 | 7.75E-08   | 5.41E-12    | 9.18E-08 | 1           | 1.31E-04 |

|                           |        |               |     |            |          |             |             |          |             |          |
|---------------------------|--------|---------------|-----|------------|----------|-------------|-------------|----------|-------------|----------|
| phe.Fasting_rs147417996S7 | DIAPH1 | rs11989304    | S4  | TMEM64     | 5.56E-07 | 1.00E+00    | 3.61E-04    | 1.15E-11 | 0.000469077 | 4.23E-08 |
| phe.Fasting_rs147417996S7 | DIAPH1 | rs140524622S7 |     | MRPL10     | 1.81E-17 | 7.37E-10    | 1.32E-13    | 2.85E-06 | 1           | 2.80E-03 |
| phe.Fasting_rs147417996S7 | DIAPH1 | rs146815317S5 |     | KPNA3      | 5.05E-16 | 2.06E-08    | 1.59E-12    | 2.49E-14 | 1.01E-06    | 1.89E-10 |
| phe.Fasting_rs147417996S7 | DIAPH1 | rs150117838S8 |     | KPNA3      | 5.05E-16 | 2.06E-08    | 1.59E-12    | 2.30E-14 | 9.36E-07    | 1.79E-10 |
| phe.Fasting_rs147417996S7 | DIAPH1 | rs150916187S4 |     | HIST1H2BK  | 4.14E-06 | 1.00E+00    | 2.11E-03    | 2.81E-15 | 1.14E-07    | 2.72E-11 |
| phe.Fasting_rs147417996S7 | DIAPH1 | rs16894241    | S4  | HIST1H2BK  | 3.73E-12 | 1.52E-04    | 6.73E-09    | 7.18E-15 | 2.92E-07    | 6.39E-11 |
| phe.Fasting_rs147417996S7 | DIAPH1 | rs34801978    | S3  | HOXB2      | 2.19E-06 | 1.00E+00    | 1.21E-03    | 2.24E-09 | 0.0911397   | 4.89E-06 |
| phe.Fasting_rs147417996S7 | DIAPH1 | rs4732511     | S13 | POR        | 9.61E-15 | 3.93E-07    | 2.45E-11    | 2.90E-06 | 1           | 2.84E-03 |
| phe.Fasting_rs147417996S7 | DIAPH1 | rs57503635    | S3  | NA         | 1.28E-16 | 5.23E-09    | 5.19E-13    | 7.18E-15 | 2.92E-07    | 6.39E-11 |
| phe.Fasting_rs147417996S7 | DIAPH1 | rs60011869    | S16 | NA         | 2.13E-06 | 1.00E+00    | 1.18E-03    | 1.84E-07 | 1           | 2.46E-04 |
| phe.Fasting_rs147417996S7 | DIAPH1 | rs6964407     | S7  | POR        | 3.32E-14 | 1.36E-06    | 8.04E-11    | 2.65E-06 | 1           | 2.63E-03 |
| phe.Fasting_rs147417996S7 | DIAPH1 | rs7004597     | S8  | NA         | 1.25E-15 | 5.12E-08    | 3.65E-12    | 5.36E-08 | 1           | 8.16E-05 |
| phe.Fasting_rs147417996S7 | DIAPH1 | rs7256517     | S7  | CYTH2      | 1.59E-16 | 6.48E-09    | 6.03E-13    | 1.01E-12 | 4.13E-05    | 4.74E-09 |
| phe.Fasting_rs147417996S7 | DIAPH1 | rs73283603    | S7  | ZWINT      | 4.49E-07 | 1.00E+00    | 2.97E-04    | 4.87E-08 | 1           | 7.49E-05 |
| phe.Fasting_rs147417996S7 | DIAPH1 | rs73392640    | S8  | POLR3B     | 4.58E-11 | 1.87E-03    | 6.24E-08    | 1.10E-11 | 0.000446024 | 4.04E-08 |
| phe.Fasting_rs147417996S7 | DIAPH1 | rs73619637    | S8  | NA         | 2.00E-16 | 8.15E-09    | 6.95E-13    | 6.56E-08 | 1           | 9.80E-05 |
| phe.Fasting_rs147417996S7 | DIAPH1 | rs74627895    | S8  | TMEM64     | 1.64E-07 | 1.00E+00    | 1.18E-04    | 4.43E-09 | 0.180369    | 9.00E-06 |
| phe.Fasting_rs147417996S7 | DIAPH1 | rs74914207    | S24 | NA         | 2.89E-11 | 1.18E-03    | 4.13E-08    | 1.71E-11 | 0.000696754 | 6.13E-08 |
| phe.Fasting_rs147417996S7 | DIAPH1 | rs75350765    | S5  | RCL1       | 2.03E-17 | 8.30E-10    | 1.43E-13    | 8.22E-09 | 0.334664    | 1.57E-05 |
| phe.Fasting_rs147417996S7 | DIAPH1 | rs75374128    | S5  | CNTLN      | 5.25E-06 | 1           | 0.00259743  | 1.90E-08 | 0.773981    | 3.28E-05 |
| phe.Fasting_rs147417996S7 | DIAPH1 | rs75506779    | S5  | TMCO3      | 1.04E-07 | 1           | 7.88E-05    | 2.35E-09 | 0.0955642   | 5.10E-06 |
| phe.Fasting_rs147417996S7 | DIAPH1 | rs75758702    | S24 | NA         | 1.04E-17 | 4.25E-10    | 9.89E-14    | 2.90E-11 | 0.00117848  | 9.92E-08 |
| phe.Fasting_rs147417996S7 | DIAPH1 | rs75864203    | S8  | CNTLN      | 5.25E-06 | 1           | 0.00259743  | 1.90E-08 | 0.773981    | 3.28E-05 |
| phe.Fasting_rs147417996S7 | DIAPH1 | rs75949566    | S5  | TMEM64     | 6.52E-07 | 1           | 0.000415514 | 1.56E-11 | 0.000636403 | 5.61E-08 |
| phe.Fasting_rs147417996S7 | DIAPH1 | rs76844308    | S8  | CNTLN      | 2.67E-06 | 1           | 0.00143908  | 1.85E-08 | 0.754334    | 3.21E-05 |
| phe.Fasting_rs147417996S7 | DIAPH1 | rs7763107     | S8  | FARS2      | 9.44E-17 | 3.86E-09    | 4.06E-13    | 1.67E-12 | 6.82E-05    | 7.43E-09 |
| phe.Fasting_rs147417996S7 | DIAPH1 | rs77798597    | S7  | KPNA3      | 5.05E-16 | 2.06E-08    | 1.59E-12    | 2.30E-14 | 9.36E-07    | 1.79E-10 |
| phe.Fasting_rs147417996S7 | DIAPH1 | rs77845645    | S21 | NA         | 3.35E-07 | 1           | 0.000229183 | 1.07E-11 | 0.000437137 | 3.97E-08 |
| phe.Fasting_rs147417996S7 | DIAPH1 | rs78353402    | S8  | AP3M2      | 1.25E-15 | 5.12E-08    | 3.65E-12    | 9.18E-08 | 1           | 1.31E-04 |
| phe.Fasting_rs147417996S7 | DIAPH1 | rs78516788    | S8  | SLC38A1    | 1.24E-06 | 1           | 0.000737575 | 2.73E-09 | 0.111147    | 5.83E-06 |
| phe.Fasting_rs147417996S7 | DIAPH1 | rs78697063    | S5  | MSI2       | 7.77E-20 | 3.17E-12    | 2.23E-14    | 1.49E-10 | 0.00608249  | 4.45E-07 |
| phe.Fasting_rs147417996S7 | DIAPH1 | rs78703708    | S7  | FAF2       | 7.40E-12 | 0.000302252 | 1.27E-08    | 7.23E-06 | 1           | 6.23E-03 |
| phe.Fasting_rs147417996S7 | DIAPH1 | rs78722272    | S5  | CNTLN      | 5.25E-06 | 1           | 0.00259743  | 1.95E-08 | 0.795481    | 3.36E-05 |
| phe.Fasting_rs147417996S7 | DIAPH1 | rs78736524    | S5  | KPNA3      | 5.05E-16 | 2.06E-08    | 1.59E-12    | 2.49E-14 | 1.01E-06    | 1.89E-10 |
| phe.Fasting_rs147417996S7 | DIAPH1 | rs78990344    | S2  | LOC1005063 | 5.56E-07 | 1           | 0.000361481 | 1.15E-11 | 0.000469077 | 4.23E-08 |
| phe.Fasting_rs147417996S7 | DIAPH1 | rs79781495    | S8  | KPNA3      | 5.05E-16 | 2.06E-08    | 1.59E-12    | 2.30E-14 | 9.36E-07    | 1.79E-10 |
| phe.Fasting_rs147417996S7 | DIAPH1 | rs80200953    | S8  | PPP2R5D    | 1.41E-17 | 5.76E-10    | 1.14E-13    | 8.95E-10 | 0.0364115   | 2.15E-06 |
| phe.Fasting_rs147417996S7 | DIAPH1 | rs80332465    | S5  | KPNA3      | 5.36E-16 | 2.19E-08    | 1.67E-12    | 2.47E-14 | 1.00E-06    | 1.88E-10 |
| phe.Fasting_rs147417996S7 | DIAPH1 | rs80334773    | S5  | KPNA3      | 5.36E-16 | 2.19E-08    | 1.67E-12    | 2.47E-14 | 1.00E-06    | 1.88E-10 |
| phe.Fasting_rs147417996S7 | DIAPH1 | rs891061      | S7  | POP4       | 6.59E-07 | 1           | 0.000419527 | 1.12E-05 | 1           | 8.91E-03 |



|                             |                           |           |          |             |             |          |             |          |
|-----------------------------|---------------------------|-----------|----------|-------------|-------------|----------|-------------|----------|
| phe.Fasting_rs147506725 S21 | "PCDHGA1,Prs112089881 S8  | ZFAND4    | 1.96E-18 | 7.99E-11    | 4.03E-14    | 3.02E-10 | 0.0122912   | 8.15E-07 |
| phe.Fasting_rs147506725 S21 | "PCDHGA1,Prs112091318 S5  | TMEM64    | 1.52E-05 | 1           | 0.0065785   | 2.56E-07 | 1           | 3.30E-04 |
| phe.Fasting_rs147506725 S21 | "PCDHGA1,Prs114334325 S7  | AP3M2     | 8.70E-16 | 3.55E-08    | 2.60E-12    | 5.52E-06 | 1           | 4.97E-03 |
| phe.Fasting_rs147506725 S21 | "PCDHGA1,Prs114394395 S7  | AP3M2     | 9.30E-16 | 3.80E-08    | 2.77E-12    | 5.52E-06 | 1           | 4.97E-03 |
| phe.Fasting_rs147506725 S21 | "PCDHGA1,Prs114565620 S8  | RCL1      | 1.29E-17 | 5.26E-10    | 1.08E-13    | 1.39E-08 | 0.566303    | 2.49E-05 |
| phe.Fasting_rs147506725 S21 | "PCDHGA1,Prs115305957 S23 | NA        | 1.81E-05 | 1           | 0.0076596   | 1.43E-12 | 5.82E-05    | 6.44E-09 |
| phe.Fasting_rs147506725 S21 | "PCDHGA1,Prs115787552 S5  | KPNA3     | 3.78E-16 | 1.54E-08    | 1.23E-12    | 4.20E-14 | 1.71E-06    | 2.93E-10 |
| phe.Fasting_rs147506725 S21 | "PCDHGA1,Prs115888477 S8  | NA        | 2.72E-15 | 1.11E-07    | 7.62E-12    | 7.36E-15 | 3.00E-07    | 6.53E-11 |
| phe.Fasting_rs147506725 S21 | "PCDHGA1,Prs116011837 S9  | BRD2      | 1.05E-06 | 1           | 0.00063174  | 6.95E-14 | 2.83E-06    | 4.69E-10 |
| phe.Fasting_rs147506725 S21 | "PCDHGA1,Prs116079984 S8  | KPNA3     | 3.78E-16 | 1.54E-08    | 1.23E-12    | 4.48E-14 | 1.82E-06    | 3.11E-10 |
| phe.Fasting_rs147506725 S21 | "PCDHGA1,Prs116120727 S9  | BRD2      | 1.05E-06 | 1           | 0.00063174  | 6.95E-14 | 2.83E-06    | 4.69E-10 |
| phe.Fasting_rs147506725 S21 | "PCDHGA1,Prs116406581 S2  | NA        | 3.68E-15 | 1.50E-07    | 9.90E-12    | 3.30E-06 | 1           | 3.18E-03 |
| phe.Fasting_rs147506725 S21 | "PCDHGA1,Prs116548615 S8  | TMEM45B   | 2.04E-17 | 8.34E-10    | 1.43E-13    | 7.86E-12 | 0.000320069 | 2.98E-08 |
| phe.Fasting_rs147506725 S21 | "PCDHGA1,Prs116696844 S3  | AP3M2     | 1.40E-15 | 5.70E-08    | 4.02E-12    | 5.52E-06 | 1           | 4.97E-03 |
| phe.Fasting_rs147506725 S21 | "PCDHGA1,Prs146815317 S5  | KPNA3     | 3.78E-16 | 1.54E-08    | 1.23E-12    | 4.20E-14 | 1.71E-06    | 2.93E-10 |
| phe.Fasting_rs147506725 S21 | "PCDHGA1,Prs150117838 S8  | KPNA3     | 3.78E-16 | 1.54E-08    | 1.23E-12    | 3.89E-14 | 1.58E-06    | 2.77E-10 |
| phe.Fasting_rs147506725 S21 | "PCDHGA1,Prs16894241 S4   | HIST1H2BK | 1.90E-07 | 1           | 0.000135936 | 1.18E-14 | 4.80E-07    | 1.01E-10 |
| phe.Fasting_rs147506725 S21 | "PCDHGA1,Prs2153597 S8    | ZNF438    | 5.42E-12 | 0.000221525 | 9.59E-09    | 5.42E-06 | 1           | 4.90E-03 |
| phe.Fasting_rs147506725 S21 | "PCDHGA1,Prs352346 S3     | GRPEL2    | 2.27E-07 | 1           | 0.000160179 | 1.07E-05 | 1           | 8.65E-03 |
| phe.Fasting_rs147506725 S21 | "PCDHGA1,Prs57503635 S3   | NA        | 7.95E-08 | 1           | 6.20E-05    | 1.16E-14 | 4.73E-07    | 1.00E-10 |
| phe.Fasting_rs147506725 S21 | "PCDHGA1,Prs60011869 S16  | NA        | 1.45E-06 | 1.00E+00    | 8.45E-04    | 3.19E-10 | 0.0129858   | 8.56E-07 |
| phe.Fasting_rs147506725 S21 | "PCDHGA1,Prs7004597 S8    | NA        | 8.70E-16 | 3.55E-08    | 2.60E-12    | 3.26E-06 | 1           | 3.15E-03 |
| phe.Fasting_rs147506725 S21 | "PCDHGA1,Prs7256517 S7    | CYTH2     | 1.38E-16 | 5.63E-09    | 5.47E-13    | 2.91E-10 | 0.0118364   | 7.91E-07 |
| phe.Fasting_rs147506725 S21 | "PCDHGA1,Prs73392640 S8   | POLR3B    | 3.00E-11 | 1.22E-03    | 4.24E-08    | 4.09E-10 | 0.0166326   | 1.07E-06 |
| phe.Fasting_rs147506725 S21 | "PCDHGA1,Prs74627895 S8   | TMEM64    | 1.52E-05 | 1.00E+00    | 6.58E-03    | 1.28E-07 | 1           | 1.77E-04 |
| phe.Fasting_rs147506725 S21 | "PCDHGA1,Prs74701059 S24  | C17orf102 | 1.84E-05 | 1.00E+00    | 7.76E-03    | 2.11E-12 | 8.58E-05    | 9.15E-09 |
| phe.Fasting_rs147506725 S21 | "PCDHGA1,Prs74914207 S24  | NA        | 1.23E-11 | 5.03E-04    | 1.92E-08    | 1.49E-07 | 1           | 2.03E-04 |
| phe.Fasting_rs147506725 S21 | "PCDHGA1,Prs75350765 S5   | RCL1      | 1.29E-17 | 5.26E-10    | 1.08E-13    | 1.39E-08 | 0.566303    | 2.49E-05 |
| phe.Fasting_rs147506725 S21 | "PCDHGA1,Prs75374128 S5   | CNTLN     | 1.32E-17 | 5.41E-10    | 1.09E-13    | 2.01E-06 | 1           | 2.08E-03 |
| phe.Fasting_rs147506725 S21 | "PCDHGA1,Prs75758702 S24  | NA        | 7.70E-18 | 3.14E-10    | 8.50E-14    | 6.42E-10 | 0.0261274   | 1.61E-06 |
| phe.Fasting_rs147506725 S21 | "PCDHGA1,Prs75864203 S8   | CNTLN     | 1.32E-17 | 5.41E-10    | 1.09E-13    | 2.01E-06 | 1           | 2.08E-03 |
| phe.Fasting_rs147506725 S21 | "PCDHGA1,Prs76844308 S8   | CNTLN     | 7.07E-18 | 2.89E-10    | 8.18E-14    | 1.78E-06 | 1           | 1.87E-03 |
| phe.Fasting_rs147506725 S21 | "PCDHGA1,Prs7763107 S8    | FARS2     | 2.63E-08 | 1           | 2.28E-05    | 3.07E-10 | 0.012484    | 8.27E-07 |
| phe.Fasting_rs147506725 S21 | "PCDHGA1,Prs77798597 S7   | KPNA3     | 3.78E-16 | 1.54E-08    | 1.23E-12    | 3.89E-14 | 1.58E-06    | 2.77E-10 |
| phe.Fasting_rs147506725 S21 | "PCDHGA1,Prs77845645 S21  | NA        | 2.15E-07 | 1           | 0.000152266 | 2.70E-11 | 0.00109923  | 9.29E-08 |
| phe.Fasting_rs147506725 S21 | "PCDHGA1,Prs78353402 S8   | AP3M2     | 8.70E-16 | 3.55E-08    | 2.60E-12    | 5.52E-06 | 1           | 4.97E-03 |
| phe.Fasting_rs147506725 S21 | "PCDHGA1,Prs78516788 S8   | SLC38A1   | 3.43E-12 | 1.40E-04    | 6.23E-09    | 7.67E-09 | 0.312323    | 1.47E-05 |
| phe.Fasting_rs147506725 S21 | "PCDHGA1,Prs78697063 S5   | MSI2      | 4.23E-20 | 1.73E-12    | 2.23E-14    | 2.49E-10 | 0.0101226   | 6.85E-07 |
| phe.Fasting_rs147506725 S21 | "PCDHGA1,Prs78722272 S5   | CNTLN     | 1.32E-17 | 5.41E-10    | 1.09E-13    | 2.07E-06 | 1           | 2.14E-03 |
| phe.Fasting_rs147506725 S21 | "PCDHGA1,Prs78736524 S5   | KPNA3     | 3.78E-16 | 1.54E-08    | 1.23E-12    | 4.20E-14 | 1.71E-06    | 2.93E-10 |

|              |                 |                             |           |          |             |             |          |             |          |
|--------------|-----------------|-----------------------------|-----------|----------|-------------|-------------|----------|-------------|----------|
| phe.Fasting_ | rs147506725 S21 | "PCDHGA1,Prs79703349 S24    | C17orf102 | 1.84E-05 | 1.00E+00    | 7.76E-03    | 2.63E-12 | 0.000107117 | 1.13E-08 |
| phe.Fasting_ | rs147506725 S21 | "PCDHGA1,Prs79781495 S8     | KPNA3     | 3.78E-16 | 1.54E-08    | 1.23E-12    | 3.89E-14 | 1.58E-06    | 2.77E-10 |
| phe.Fasting_ | rs147506725 S21 | "PCDHGA1,Prs79886603 S15    | NA        | 1.10E-08 | 4.48E-01    | 1.01E-05    | 9.00E-06 | 1           | 7.49E-03 |
| phe.Fasting_ | rs147506725 S21 | "PCDHGA1,Prs80200953 S8     | PPP2R5D   | 1.32E-08 | 5.39E-01    | 1.20E-05    | 3.10E-06 | 1           | 3.01E-03 |
| phe.Fasting_ | rs147506725 S21 | "PCDHGA1,Prs80332465 S5     | KPNA3     | 4.04E-16 | 1.65E-08    | 1.31E-12    | 4.20E-14 | 1.71E-06    | 2.93E-10 |
| phe.Fasting_ | rs147506725 S21 | "PCDHGA1,Prs80334773 S5     | KPNA3     | 4.04E-16 | 1.65E-08    | 1.31E-12    | 4.20E-14 | 1.71E-06    | 2.93E-10 |
| phe.Fasting_ | rs147646948 S7  | "LOC100505(rs111576333) S5  | TMEM64    | 2.37E-06 | 1.00E+00    | 1.30E-03    | 5.87E-14 | 2.39E-06    | 3.99E-10 |
| phe.Fasting_ | rs147646948 S7  | "LOC100505(rs112089881) S8  | ZFAND4    | 2.04E-17 | 8.32E-10    | 1.43E-13    | 1.09E-09 | 0.0445256   | 2.58E-06 |
| phe.Fasting_ | rs147646948 S7  | "LOC100505(rs112091318) S5  | TMEM64    | 7.32E-07 | 1           | 0.000459899 | 3.91E-08 | 1           | 6.13E-05 |
| phe.Fasting_ | rs147646948 S7  | "LOC100505(rs114334325) S7  | AP3M2     | 4.51E-15 | 1.84E-07    | 1.18E-11    | 3.87E-07 | 1           | 4.75E-04 |
| phe.Fasting_ | rs147646948 S7  | "LOC100505(rs114394395) S7  | AP3M2     | 4.81E-15 | 1.97E-07    | 1.25E-11    | 3.87E-07 | 1           | 4.75E-04 |
| phe.Fasting_ | rs147646948 S7  | "LOC100505(rs114565620) S8  | RCL1      | 1.82E-16 | 7.42E-09    | 6.37E-13    | 3.70E-08 | 1           | 5.84E-05 |
| phe.Fasting_ | rs147646948 S7  | "LOC100505(rs115083290) S19 | NA        | 4.38E-16 | 1.79E-08    | 1.40E-12    | 1.42E-08 | 0.576679    | 2.53E-05 |
| phe.Fasting_ | rs147646948 S7  | "LOC100505(rs11524145) S5   | CDK6      | 7.80E-07 | 1           | 0.000486356 | 7.89E-06 | 1           | 6.69E-03 |
| phe.Fasting_ | rs147646948 S7  | "LOC100505(rs115752779) S19 | NA        | 4.38E-16 | 1.79E-08    | 1.40E-12    | 1.42E-08 | 0.576679    | 2.53E-05 |
| phe.Fasting_ | rs147646948 S7  | "LOC100505(rs115787552) S5  | KPNA3     | 2.97E-15 | 1.21E-07    | 8.14E-12    | 1.18E-13 | 4.80E-06    | 7.06E-10 |
| phe.Fasting_ | rs147646948 S7  | "LOC100505(rs115888477) S8  | NA        | 2.03E-14 | 8.28E-07    | 5.02E-11    | 2.21E-14 | 8.99E-07    | 1.73E-10 |
| phe.Fasting_ | rs147646948 S7  | "LOC100505(rs116011837) S9  | BRD2      | 4.89E-11 | 2.00E-03    | 6.62E-08    | 4.07E-14 | 1.66E-06    | 2.85E-10 |
| phe.Fasting_ | rs147646948 S7  | "LOC100505(rs116079984) S8  | KPNA3     | 2.97E-15 | 1.21E-07    | 8.14E-12    | 1.24E-13 | 5.04E-06    | 7.34E-10 |
| phe.Fasting_ | rs147646948 S7  | "LOC100505(rs116120727) S9  | BRD2      | 4.89E-11 | 2.00E-03    | 6.62E-08    | 4.07E-14 | 1.66E-06    | 2.85E-10 |
| phe.Fasting_ | rs147646948 S7  | "LOC100505(rs116406581) S2  | NA        | 1.81E-14 | 7.39E-07    | 4.52E-11    | 2.35E-07 | 1           | 3.05E-04 |
| phe.Fasting_ | rs147646948 S7  | "LOC100505(rs116548615) S8  | TMEM45B   | 1.73E-16 | 7.06E-09    | 6.15E-13    | 8.70E-12 | 0.000354153 | 3.26E-08 |
| phe.Fasting_ | rs147646948 S7  | "LOC100505(rs116696844) S3  | AP3M2     | 6.92E-15 | 2.83E-07    | 1.78E-11    | 3.87E-07 | 1           | 4.75E-04 |
| phe.Fasting_ | rs147646948 S7  | "LOC100505(rs11989304) S4   | TMEM64    | 2.37E-06 | 1.00E+00    | 1.30E-03    | 6.78E-11 | 0.00276161  | 2.13E-07 |
| phe.Fasting_ | rs147646948 S7  | "LOC100505(rs140524622) S7  | MRPL10    | 1.08E-16 | 4.41E-09    | 4.54E-13    | 7.35E-06 | 1           | 6.31E-03 |
| phe.Fasting_ | rs147646948 S7  | "LOC100505(rs146815317) S5  | KPNA3     | 2.97E-15 | 1.21E-07    | 8.14E-12    | 1.18E-13 | 4.80E-06    | 7.06E-10 |
| phe.Fasting_ | rs147646948 S7  | "LOC100505(rs150117838) S8  | KPNA3     | 2.97E-15 | 1.21E-07    | 8.14E-12    | 1.09E-13 | 4.44E-06    | 6.79E-10 |
| phe.Fasting_ | rs147646948 S7  | "LOC100505(rs150916187) S4  | HIST1H2BK | 1.38E-05 | 1.00E+00    | 6.05E-03    | 1.37E-14 | 5.59E-07    | 1.16E-10 |
| phe.Fasting_ | rs147646948 S7  | "LOC100505(rs16894241) S4   | HIST1H2BK | 1.99E-11 | 8.12E-04    | 2.96E-08    | 3.44E-14 | 1.40E-06    | 2.50E-10 |
| phe.Fasting_ | rs147646948 S7  | "LOC100505(rs2032062) S8    | NA        | 1.22E-14 | 4.98E-07    | 3.09E-11    | 8.48E-06 | 1           | 7.14E-03 |
| phe.Fasting_ | rs147646948 S7  | "LOC100505(rs2153597) S8    | ZNF438    | 5.51E-11 | 2.25E-03    | 7.42E-08    | 4.52E-09 | 0.183916    | 9.08E-06 |
| phe.Fasting_ | rs147646948 S7  | "LOC100505(rs2835656) S7    | TTC3      | 3.01E-10 | 0.0122766   | 3.60E-07    | 9.12E-06 | 1           | 7.57E-03 |
| phe.Fasting_ | rs147646948 S7  | "LOC100505(rs34801978) S3   | HOXB2     | 1.23E-05 | 1           | 5.46E-03    | 1.03E-08 | 0.419057    | 1.90E-05 |
| phe.Fasting_ | rs147646948 S7  | "LOC100505(rs352346) S3     | GRPEL2    | 1.85E-11 | 0.000754995 | 2.78E-08    | 8.42E-06 | 1           | 7.10E-03 |
| phe.Fasting_ | rs147646948 S7  | "LOC100505(rs3750898) S8    | DCLRE1A   | 2.29E-05 | 1           | 9.35E-03    | 8.76E-06 | 1           | 7.32E-03 |
| phe.Fasting_ | rs147646948 S7  | "LOC100505(rs4732511) S13   | POR       | 2.30E-15 | 9.39E-08    | 6.48E-12    | 9.65E-06 | 1           | 7.93E-03 |
| phe.Fasting_ | rs147646948 S7  | "LOC100505(rs57503635) S3   | NA        | 6.34E-16 | 2.59E-08    | 1.95E-12    | 3.17E-14 | 1.29E-06    | 2.34E-10 |
| phe.Fasting_ | rs147646948 S7  | "LOC100505(rs58905476) S7   | TTC3      | 3.29E-10 | 0.0134302   | 3.90E-07    | 9.79E-06 | 1           | 8.01E-03 |
| phe.Fasting_ | rs147646948 S7  | "LOC100505(rs60011869) S16  | NA        | 1.04E-05 | 1           | 4.72E-03    | 8.16E-10 | 0.0332257   | 1.98E-06 |
| phe.Fasting_ | rs147646948 S7  | "LOC100505(rs6964407) S7    | POR       | 7.55E-15 | 3.08E-07    | 1.94E-11    | 8.91E-06 | 1           | 7.43E-03 |

|              |             |    |                       |             |            |          |            |             |          |             |            |          |
|--------------|-------------|----|-----------------------|-------------|------------|----------|------------|-------------|----------|-------------|------------|----------|
| phe.Fasting_ | rs147646948 | S7 | "LOC100505(rs7004597  | S8          | NA         | 4.51E-15 | 1.84E-07   | 1.18E-11    | 2.34E-07 | 1           | 3.04E-04   |          |
| phe.Fasting_ | rs147646948 | S7 | "LOC100505(rs7256517  | S7          | CYTH2      | 1.04E-15 | 4.24E-08   | 3.06E-12    | 4.82E-12 | 0.000196022 | 1.91E-08   |          |
| phe.Fasting_ | rs147646948 | S7 | "LOC100505(rs73283603 | S7          | ZWINT      | 1.90E-06 | 1          | 1.07E-03    | 2.03E-07 | 1           | 2.68E-04   |          |
| phe.Fasting_ | rs147646948 | S7 | "LOC100505(rs73392640 | S8          | POLR3B     | 2.02E-10 | 0.00826001 | 2.49E-07    | 5.19E-11 | 0.00211214  | 1.67E-07   |          |
| phe.Fasting_ | rs147646948 | S7 | "LOC100505(rs734069   | S19         | NA         | 2.06E-08 | 0.839421   | 1.81E-05    | 6.71E-10 | 0.0272994   | 1.68E-06   |          |
| phe.Fasting_ | rs147646948 | S7 | "LOC100505(rs73619637 | S8          | NA         | 1.44E-15 | 5.89E-08   | 4.14E-12    | 2.05E-10 | 0.00833668  | 5.78E-07   |          |
| phe.Fasting_ | rs147646948 | S7 | "LOC100505(rs74627895 | S8          | TMEM64     | 7.32E-07 | 1          | 4.60E-04    | 2.03E-08 | 0.828094    | 3.48E-05   |          |
| phe.Fasting_ | rs147646948 | S7 | "LOC100505(rs74914207 | S24         | NA         | 1.37E-10 | 0.00558626 | 1.73E-07    | 9.12E-11 | 0.0037135   | 2.80E-07   |          |
| phe.Fasting_ | rs147646948 | S7 | "LOC100505(rs75350765 | S5          | RCL1       | 1.82E-16 | 7.42E-09   | 6.37E-13    | 3.70E-08 | 1           | 5.84E-05   |          |
| phe.Fasting_ | rs147646948 | S7 | "LOC100505(rs75374128 | S5          | CNTLN      | 1.47E-16 | 6.01E-09   | 5.72E-13    | 1.01E-07 | 1           | 1.42E-04   |          |
| phe.Fasting_ | rs147646948 | S7 | "LOC100505(rs75506779 | S5          | TMCO3      | 5.55E-07 | 1          | 3.61E-04    | 1.10E-08 | 0.449707    | 2.03E-05   |          |
| phe.Fasting_ | rs147646948 | S7 | "LOC100505(rs75758702 | S24         | NA         | 7.02E-17 | 2.87E-09   | 3.16E-13    | 1.57E-10 | 0.00638323  | 4.59E-07   |          |
| phe.Fasting_ | rs147646948 | S7 | "LOC100505(rs75864203 | S8          | CNTLN      | 1.47E-16 | 6.01E-09   | 5.72E-13    | 1.01E-07 | 1           | 1.42E-04   |          |
| phe.Fasting_ | rs147646948 | S7 | "LOC100505(rs75949566 | S5          | TMEM64     | 2.76E-06 | 1          | 1.47E-03    | 8.48E-11 | 0.00345267  | 2.62E-07   |          |
| phe.Fasting_ | rs147646948 | S7 | "LOC100505(rs76844308 | S8          | CNTLN      | 7.68E-17 | 3.14E-09   | 3.41E-13    | 9.52E-08 | 1           | 1.35E-04   |          |
| phe.Fasting_ | rs147646948 | S7 | "LOC100505(rs7763107  | S8          | FARS2      | 5.78E-16 | 2.36E-08   | 1.79E-12    | 9.23E-12 | 0.000375564 | 3.44E-08   |          |
| phe.Fasting_ | rs147646948 | S7 | "LOC100505(rs77798597 | S7          | KPNA3      | 2.97E-15 | 1.21E-07   | 8.14E-12    | 1.09E-13 | 4.44E-06    | 6.79E-10   |          |
| phe.Fasting_ | rs147646948 | S7 | "LOC100505(rs77845645 | S21         | NA         | 1.53E-06 | 1          | 8.88E-04    | 4.20E-11 | 0.00170882  | 1.38E-07   |          |
| phe.Fasting_ | rs147646948 | S7 | "LOC100505(rs78353402 | S8          | ALP3M2     | 4.51E-15 | 1.84E-07   | 1.18E-11    | 3.87E-07 | 1           | 4.75E-04   |          |
| phe.Fasting_ | rs147646948 | S7 | "LOC100505(rs78516788 | S8          | SLC38A1    | 2.75E-11 | 0.00112269 | 3.94E-08    | 2.44E-10 | 0.00992686  | 6.74E-07   |          |
| phe.Fasting_ | rs147646948 | S7 | "LOC100505(rs78697063 | S5          | MSI2       | 8.23E-19 | 3.36E-11   | 2.70E-14    | 6.84E-10 | 0.0278369   | 1.70E-06   |          |
| phe.Fasting_ | rs147646948 | S7 | "LOC100505(rs78722272 | S5          | CNTLN      | 1.47E-16 | 6.01E-09   | 5.72E-13    | 1.05E-07 | 1           | 1.48E-04   |          |
| phe.Fasting_ | rs147646948 | S7 | "LOC100505(rs78736524 | S5          | KPNA3      | 2.97E-15 | 1.21E-07   | 8.14E-12    | 1.18E-13 | 4.80E-06    | 7.06E-10   |          |
| phe.Fasting_ | rs147646948 | S7 | "LOC100505(rs78990344 | S2          | LOC1005063 | 2.37E-06 | 1          | 1.30E-03    | 6.78E-11 | 0.00276161  | 2.13E-07   |          |
| phe.Fasting_ | rs147646948 | S7 | "LOC100505(rs79781495 | S8          | KPNA3      | 2.97E-15 | 1.21E-07   | 8.14E-12    | 1.09E-13 | 4.44E-06    | 6.79E-10   |          |
| phe.Fasting_ | rs147646948 | S7 | "LOC100505(rs79886603 | S15         | NA         | 8.71E-08 | 1          | 6.74E-05    | 4.66E-07 | 1           | 5.59E-04   |          |
| phe.Fasting_ | rs147646948 | S7 | "LOC100505(rs80200953 | S8          | PPP2R5D    | 8.49E-17 | 3.47E-09   | 3.69E-13    | 3.65E-09 | 0.148399    | 7.55E-06   |          |
| phe.Fasting_ | rs147646948 | S7 | "LOC100505(rs80332465 | S5          | KPNA3      | 3.13E-15 | 1.28E-07   | 8.51E-12    | 1.17E-13 | 4.77E-06    | 7.06E-10   |          |
| phe.Fasting_ | rs147646948 | S7 | "LOC100505(rs80334773 | S5          | KPNA3      | 3.13E-15 | 1.28E-07   | 8.51E-12    | 1.17E-13 | 4.77E-06    | 7.06E-10   |          |
| phe.Fasting_ | rs147677041 | S8 | DIAPH1                | rs111576333 | S5         | TMEM64   | 5.56E-07   | 1           | 3.61E-04 | 7.80E-15    | 3.17E-07   | 6.90E-11 |
| phe.Fasting_ | rs147677041 | S8 | DIAPH1                | rs112089881 | S8         | ZFAND4   | 3.24E-18   | 1.32E-10    | 5.45E-14 | 1.95E-10    | 0.00795558 | 5.56E-07 |
| phe.Fasting_ | rs147677041 | S8 | DIAPH1                | rs112091318 | S5         | TMEM64   | 1.64E-07   | 1           | 1.18E-04 | 9.13E-09    | 0.371559   | 1.72E-05 |
| phe.Fasting_ | rs147677041 | S8 | DIAPH1                | rs114334325 | S7         | AP3M2    | 1.25E-15   | 5.12E-08    | 3.65E-12 | 8.81E-08    | 1          | 1.26E-04 |
| phe.Fasting_ | rs147677041 | S8 | DIAPH1                | rs114394395 | S7         | AP3M2    | 1.33E-15   | 5.44E-08    | 3.85E-12 | 8.81E-08    | 1          | 1.26E-04 |
| phe.Fasting_ | rs147677041 | S8 | DIAPH1                | rs114565620 | S8         | RCL1     | 2.03E-17   | 8.30E-10    | 1.43E-13 | 8.23E-09    | 0.335069   | 1.57E-05 |
| phe.Fasting_ | rs147677041 | S8 | DIAPH1                | rs115083290 | S19        | NA       | 8.17E-17   | 3.34E-09    | 3.58E-13 | 2.77E-09    | 0.11274    | 5.90E-06 |
| phe.Fasting_ | rs147677041 | S8 | DIAPH1                | rs115752779 | S19        | NA       | 8.17E-17   | 3.34E-09    | 3.58E-13 | 2.77E-09    | 0.11274    | 5.90E-06 |
| phe.Fasting_ | rs147677041 | S8 | DIAPH1                | rs115787552 | S5         | KPNA3    | 5.05E-16   | 2.06E-08    | 1.59E-12 | 2.34E-14    | 9.53E-07   | 1.79E-10 |
| phe.Fasting_ | rs147677041 | S8 | DIAPH1                | rs115888477 | S8         | NA       | 3.68E-15   | 1.50E-07    | 9.90E-12 | 4.11E-15    | 1.67E-07   | 3.84E-11 |
| phe.Fasting_ | rs147677041 | S8 | DIAPH1                | rs116011837 | S9         | BRD2     | 9.60E-12   | 0.000392176 | 1.53E-08 | 9.05E-15    | 3.68E-07   | 7.90E-11 |

|                            |        |                |            |          |             |             |          |             |          |
|----------------------------|--------|----------------|------------|----------|-------------|-------------|----------|-------------|----------|
| phe.Fasting_rs147677041 S8 | DIAPH1 | rs116079984 S8 | KPNA3      | 5.05E-16 | 2.06E-08    | 1.59E-12    | 2.56E-14 | 1.04E-06    | 1.94E-10 |
| phe.Fasting_rs147677041 S8 | DIAPH1 | rs116120727 S9 | BRD2       | 9.60E-12 | 0.000392176 | 1.53E-08    | 9.05E-15 | 3.68E-07    | 7.90E-11 |
| phe.Fasting_rs147677041 S8 | DIAPH1 | rs116406581 S2 | NA         | 5.24E-15 | 2.14E-07    | 1.36E-11    | 5.32E-08 | 1           | 8.11E-05 |
| phe.Fasting_rs147677041 S8 | DIAPH1 | rs116548615 S8 | TMEM45B    | 2.95E-17 | 1.21E-09    | 1.69E-13    | 1.76E-12 | 7.17E-05    | 7.72E-09 |
| phe.Fasting_rs147677041 S8 | DIAPH1 | rs116696844 S3 | AP3M2      | 1.90E-15 | 7.75E-08    | 5.41E-12    | 8.81E-08 | 1           | 1.26E-04 |
| phe.Fasting_rs147677041 S8 | DIAPH1 | rs11989304 S4  | TMEM64     | 5.56E-07 | 1.00E+00    | 3.61E-04    | 1.11E-11 | 0.000453381 | 4.10E-08 |
| phe.Fasting_rs147677041 S8 | DIAPH1 | rs140524622 S7 | MRPL10     | 1.81E-17 | 7.37E-10    | 1.32E-13    | 2.83E-06 | 1           | 2.79E-03 |
| phe.Fasting_rs147677041 S8 | DIAPH1 | rs146815317 S5 | KPNA3      | 5.05E-16 | 2.06E-08    | 1.59E-12    | 2.34E-14 | 9.53E-07    | 1.79E-10 |
| phe.Fasting_rs147677041 S8 | DIAPH1 | rs150117838 S8 | KPNA3      | 5.05E-16 | 2.06E-08    | 1.59E-12    | 2.16E-14 | 8.80E-07    | 1.71E-10 |
| phe.Fasting_rs147677041 S8 | DIAPH1 | rs150916187 S4 | HIST1H2BK  | 4.14E-06 | 1.00E+00    | 2.11E-03    | 2.61E-15 | 1.06E-07    | 2.55E-11 |
| phe.Fasting_rs147677041 S8 | DIAPH1 | rs16894241 S4  | HIST1H2BK  | 3.73E-12 | 0.000152384 | 6.73E-09    | 6.62E-15 | 2.69E-07    | 5.94E-11 |
| phe.Fasting_rs147677041 S8 | DIAPH1 | rs34801978 S3  | HOXB2      | 2.19E-06 | 1           | 0.00120758  | 1.65E-09 | 0.0670533   | 3.72E-06 |
| phe.Fasting_rs147677041 S8 | DIAPH1 | rs4732511 S13  | POR        | 9.61E-15 | 3.93E-07    | 2.45E-11    | 2.36E-06 | 1           | 2.39E-03 |
| phe.Fasting_rs147677041 S8 | DIAPH1 | rs57503635 S3  | NA         | 1.28E-16 | 5.23E-09    | 5.19E-13    | 6.61E-15 | 2.69E-07    | 5.94E-11 |
| phe.Fasting_rs147677041 S8 | DIAPH1 | rs60011869 S16 | NA         | 2.13E-06 | 1           | 0.00118391  | 1.78E-07 | 1           | 2.39E-04 |
| phe.Fasting_rs147677041 S8 | DIAPH1 | rs6964407 S7   | POR        | 3.32E-14 | 1.36E-06    | 8.04E-11    | 2.16E-06 | 1           | 2.22E-03 |
| phe.Fasting_rs147677041 S8 | DIAPH1 | rs7004597 S8   | NA         | 1.25E-15 | 5.12E-08    | 3.65E-12    | 5.12E-08 | 1           | 7.84E-05 |
| phe.Fasting_rs147677041 S8 | DIAPH1 | rs7256517 S7   | CYTH2      | 1.59E-16 | 6.48E-09    | 6.03E-13    | 9.69E-13 | 3.95E-05    | 4.59E-09 |
| phe.Fasting_rs147677041 S8 | DIAPH1 | rs73283603 S7  | ZWINT      | 4.49E-07 | 1           | 0.000297012 | 4.53E-08 | 1           | 7.02E-05 |
| phe.Fasting_rs147677041 S8 | DIAPH1 | rs73392640 S8  | POLR3B     | 4.58E-11 | 0.00187102  | 6.24E-08    | 6.82E-12 | 0.000277641 | 2.62E-08 |
| phe.Fasting_rs147677041 S8 | DIAPH1 | rs73619637 S8  | NA         | 2.00E-16 | 8.15E-09    | 6.95E-13    | 6.35E-08 | 1           | 9.54E-05 |
| phe.Fasting_rs147677041 S8 | DIAPH1 | rs74627895 S8  | TMEM64     | 1.64E-07 | 1           | 0.000118218 | 4.42E-09 | 0.179944    | 8.98E-06 |
| phe.Fasting_rs147677041 S8 | DIAPH1 | rs74914207 S24 | NA         | 2.89E-11 | 0.00117833  | 4.13E-08    | 1.56E-11 | 0.000634366 | 5.60E-08 |
| phe.Fasting_rs147677041 S8 | DIAPH1 | rs75350765 S5  | RCL1       | 2.03E-17 | 8.30E-10    | 1.43E-13    | 8.23E-09 | 0.335069    | 1.57E-05 |
| phe.Fasting_rs147677041 S8 | DIAPH1 | rs75374128 S5  | CNTLN      | 5.25E-06 | 1           | 0.00259743  | 1.83E-08 | 0.746586    | 3.18E-05 |
| phe.Fasting_rs147677041 S8 | DIAPH1 | rs75506779 S5  | TMCO3      | 1.04E-07 | 1           | 7.88E-05    | 2.32E-09 | 0.0942949   | 5.04E-06 |
| phe.Fasting_rs147677041 S8 | DIAPH1 | rs75758702 S24 | NA         | 1.04E-17 | 4.25E-10    | 9.89E-14    | 2.85E-11 | 0.00115844  | 9.77E-08 |
| phe.Fasting_rs147677041 S8 | DIAPH1 | rs75864203 S8  | CNTLN      | 5.25E-06 | 1           | 0.00259743  | 1.83E-08 | 0.746586    | 3.18E-05 |
| phe.Fasting_rs147677041 S8 | DIAPH1 | rs75949566 S5  | TMEM64     | 6.52E-07 | 1           | 0.000415514 | 1.49E-11 | 0.000607747 | 5.38E-08 |
| phe.Fasting_rs147677041 S8 | DIAPH1 | rs76844308 S8  | CNTLN      | 2.67E-06 | 1           | 0.00143908  | 1.80E-08 | 0.73432     | 3.14E-05 |
| phe.Fasting_rs147677041 S8 | DIAPH1 | rs7763107 S8   | FARS2      | 9.44E-17 | 3.86E-09    | 4.06E-13    | 1.60E-12 | 6.52E-05    | 7.13E-09 |
| phe.Fasting_rs147677041 S8 | DIAPH1 | rs77798597 S7  | KPNA3      | 5.05E-16 | 2.06E-08    | 1.59E-12    | 2.16E-14 | 8.80E-07    | 1.71E-10 |
| phe.Fasting_rs147677041 S8 | DIAPH1 | rs77845645 S21 | NA         | 3.35E-07 | 1           | 0.000229183 | 1.04E-11 | 0.000424266 | 3.85E-08 |
| phe.Fasting_rs147677041 S8 | DIAPH1 | rs78353402 S8  | AP3M2      | 1.25E-15 | 5.12E-08    | 3.65E-12    | 8.81E-08 | 1           | 1.26E-04 |
| phe.Fasting_rs147677041 S8 | DIAPH1 | rs78516788 S8  | SLC38A1    | 1.24E-06 | 1           | 0.000737575 | 2.76E-09 | 0.112313    | 5.89E-06 |
| phe.Fasting_rs147677041 S8 | DIAPH1 | rs78697063 S5  | MSI2       | 7.77E-20 | 3.17E-12    | 2.23E-14    | 1.45E-10 | 0.00591847  | 4.35E-07 |
| phe.Fasting_rs147677041 S8 | DIAPH1 | rs78703708 S7  | FAF2       | 7.40E-12 | 0.000302252 | 1.27E-08    | 7.08E-06 | 1           | 6.12E-03 |
| phe.Fasting_rs147677041 S8 | DIAPH1 | rs78722272 S5  | CNTLN      | 5.25E-06 | 1           | 0.00259743  | 1.89E-08 | 0.767323    | 3.26E-05 |
| phe.Fasting_rs147677041 S8 | DIAPH1 | rs78736524 S5  | KPNA3      | 5.05E-16 | 2.06E-08    | 1.59E-12    | 2.34E-14 | 9.53E-07    | 1.79E-10 |
| phe.Fasting_rs147677041 S8 | DIAPH1 | rs78990344 S2  | LOC1005063 | 5.56E-07 | 1           | 0.000361481 | 1.11E-11 | 0.000453381 | 4.10E-08 |

|              |             |    |        |             |     |           |          |             |             |          |             |          |
|--------------|-------------|----|--------|-------------|-----|-----------|----------|-------------|-------------|----------|-------------|----------|
| phe.Fasting_ | rs147677041 | S8 | DIAPH1 | rs79781495  | S8  | KPNA3     | 5.05E-16 | 2.06E-08    | 1.59E-12    | 2.16E-14 | 8.80E-07    | 1.71E-10 |
| phe.Fasting_ | rs147677041 | S8 | DIAPH1 | rs80200953  | S8  | PPP2R5D   | 1.41E-17 | 5.76E-10    | 1.14E-13    | 8.37E-10 | 0.034062    | 2.03E-06 |
| phe.Fasting_ | rs147677041 | S8 | DIAPH1 | rs80332465  | S5  | KPNA3     | 5.36E-16 | 2.19E-08    | 1.67E-12    | 2.32E-14 | 9.45E-07    | 1.79E-10 |
| phe.Fasting_ | rs147677041 | S8 | DIAPH1 | rs80334773  | S5  | KPNA3     | 5.36E-16 | 2.19E-08    | 1.67E-12    | 2.32E-14 | 9.45E-07    | 1.79E-10 |
| phe.Fasting_ | rs147677041 | S8 | DIAPH1 | rs891061    | S7  | POP4      | 6.59E-07 | 1           | 0.000419527 | 1.19E-05 | 1           | 9.35E-03 |
| phe.Fasting_ | rs147924635 | S8 | UBE4B  | rs112348319 | S8  | SPTLC1    | 5.66E-06 | 1           | 0.00277821  | 1.26E-06 | 1           | 1.39E-03 |
| phe.Fasting_ | rs147924635 | S8 | UBE4B  | rs112608164 | S8  | SPTLC1    | 5.66E-06 | 1           | 0.00277821  | 1.26E-06 | 1           | 1.39E-03 |
| phe.Fasting_ | rs147924635 | S8 | UBE4B  | rs138090701 | S5  | HDAC3     | 1.99E-05 | 1           | 0.00831239  | 9.46E-07 | 1           | 1.07E-03 |
| phe.Fasting_ | rs147924635 | S8 | UBE4B  | rs149716949 | S5  | DIAPH1    | 1.63E-05 | 1           | 0.00695694  | 9.47E-07 | 1           | 1.08E-03 |
| phe.Fasting_ | rs147924635 | S8 | UBE4B  | rs6881310   | S23 | ISL1      | 1.53E-06 | 1           | 0.000889797 | 1.10E-05 | 1           | 8.83E-03 |
| phe.Fasting_ | rs147924635 | S8 | UBE4B  | rs76542405  | S5  | SPTLC1    | 5.66E-06 | 1           | 0.00277821  | 1.26E-06 | 1           | 1.39E-03 |
| phe.Fasting_ | rs147924635 | S8 | UBE4B  | rs77444916  | S23 | LOC642366 | 1.41E-06 | 1           | 0.000827894 | 3.89E-12 | 0.000158404 | 1.61E-08 |
| phe.Fasting_ | rs147924635 | S8 | UBE4B  | rs77523818  | S7  | SPTLC1    | 5.66E-06 | 1           | 0.00277821  | 1.26E-06 | 1           | 1.39E-03 |
| phe.Fasting_ | rs147924635 | S8 | UBE4B  | rs77845645  | S21 | NA        | 7.52E-07 | 1           | 0.000470891 | 5.29E-09 | 0.21548     | 1.04E-05 |
| phe.Fasting_ | rs147924635 | S8 | UBE4B  | rs80258830  | S24 | LOC642366 | 1.41E-06 | 1           | 0.000827894 | 3.89E-12 | 0.000158404 | 1.61E-08 |
| phe.Fasting_ | rs148116628 | S7 | DIAPH1 | rs111576333 | S5  | TMEM64    | 2.37E-06 | 1           | 0.00129547  | 5.87E-14 | 2.39E-06    | 3.99E-10 |
| phe.Fasting_ | rs148116628 | S7 | DIAPH1 | rs112089881 | S8  | ZFAND4    | 2.04E-17 | 8.32E-10    | 1.43E-13    | 1.09E-09 | 0.0445256   | 2.58E-06 |
| phe.Fasting_ | rs148116628 | S7 | DIAPH1 | rs112091318 | S5  | TMEM64    | 7.32E-07 | 1           | 0.000459899 | 3.91E-08 | 1           | 6.13E-05 |
| phe.Fasting_ | rs148116628 | S7 | DIAPH1 | rs114334325 | S7  | AP3M2     | 4.51E-15 | 1.84E-07    | 1.18E-11    | 3.87E-07 | 1           | 4.75E-04 |
| phe.Fasting_ | rs148116628 | S7 | DIAPH1 | rs114394395 | S7  | AP3M2     | 4.81E-15 | 1.97E-07    | 1.25E-11    | 3.87E-07 | 1           | 4.75E-04 |
| phe.Fasting_ | rs148116628 | S7 | DIAPH1 | rs114565620 | S8  | RCL1      | 1.82E-16 | 7.42E-09    | 6.37E-13    | 3.70E-08 | 1           | 5.84E-05 |
| phe.Fasting_ | rs148116628 | S7 | DIAPH1 | rs115083290 | S19 | NA        | 4.38E-16 | 1.79E-08    | 1.40E-12    | 1.42E-08 | 0.576679    | 2.53E-05 |
| phe.Fasting_ | rs148116628 | S7 | DIAPH1 | rs11524145  | S5  | CDK6      | 7.80E-07 | 1.00E+00    | 4.86E-04    | 7.89E-06 | 1           | 6.69E-03 |
| phe.Fasting_ | rs148116628 | S7 | DIAPH1 | rs115752779 | S19 | NA        | 4.38E-16 | 1.79E-08    | 1.40E-12    | 1.42E-08 | 0.576679    | 2.53E-05 |
| phe.Fasting_ | rs148116628 | S7 | DIAPH1 | rs115787552 | S5  | KPNA3     | 2.97E-15 | 1.21E-07    | 8.14E-12    | 1.18E-13 | 4.80E-06    | 7.06E-10 |
| phe.Fasting_ | rs148116628 | S7 | DIAPH1 | rs115888477 | S8  | NA        | 2.03E-14 | 8.28E-07    | 5.02E-11    | 2.21E-14 | 8.99E-07    | 1.73E-10 |
| phe.Fasting_ | rs148116628 | S7 | DIAPH1 | rs116011837 | S9  | BRD2      | 4.89E-11 | 2.00E-03    | 6.62E-08    | 4.07E-14 | 1.66E-06    | 2.85E-10 |
| phe.Fasting_ | rs148116628 | S7 | DIAPH1 | rs116079984 | S8  | KPNA3     | 2.97E-15 | 1.21E-07    | 8.14E-12    | 1.24E-13 | 5.04E-06    | 7.34E-10 |
| phe.Fasting_ | rs148116628 | S7 | DIAPH1 | rs116120727 | S9  | BRD2      | 4.89E-11 | 2.00E-03    | 6.62E-08    | 4.07E-14 | 1.66E-06    | 2.85E-10 |
| phe.Fasting_ | rs148116628 | S7 | DIAPH1 | rs116406581 | S2  | NA        | 1.81E-14 | 7.39E-07    | 4.52E-11    | 2.35E-07 | 1           | 3.05E-04 |
| phe.Fasting_ | rs148116628 | S7 | DIAPH1 | rs116548615 | S8  | TMEM45B   | 1.73E-16 | 7.06E-09    | 6.15E-13    | 8.70E-12 | 0.000354153 | 3.26E-08 |
| phe.Fasting_ | rs148116628 | S7 | DIAPH1 | rs116696844 | S3  | AP3M2     | 6.92E-15 | 2.83E-07    | 1.78E-11    | 3.87E-07 | 1           | 4.75E-04 |
| phe.Fasting_ | rs148116628 | S7 | DIAPH1 | rs11989304  | S4  | TMEM64    | 2.37E-06 | 1.00E+00    | 1.30E-03    | 6.78E-11 | 0.00276161  | 2.13E-07 |
| phe.Fasting_ | rs148116628 | S7 | DIAPH1 | rs140524622 | S7  | MRPL10    | 1.08E-16 | 4.41E-09    | 4.54E-13    | 7.35E-06 | 1           | 6.31E-03 |
| phe.Fasting_ | rs148116628 | S7 | DIAPH1 | rs146815317 | S5  | KPNA3     | 2.97E-15 | 1.21E-07    | 8.14E-12    | 1.18E-13 | 4.80E-06    | 7.06E-10 |
| phe.Fasting_ | rs148116628 | S7 | DIAPH1 | rs150117838 | S8  | KPNA3     | 2.97E-15 | 1.21E-07    | 8.14E-12    | 1.09E-13 | 4.44E-06    | 6.79E-10 |
| phe.Fasting_ | rs148116628 | S7 | DIAPH1 | rs150916187 | S4  | HIST1H2BK | 1.38E-05 | 1           | 0.00605332  | 1.37E-14 | 5.59E-07    | 1.16E-10 |
| phe.Fasting_ | rs148116628 | S7 | DIAPH1 | rs16894241  | S4  | HIST1H2BK | 1.99E-11 | 0.000812315 | 2.96E-08    | 3.44E-14 | 1.40E-06    | 2.50E-10 |
| phe.Fasting_ | rs148116628 | S7 | DIAPH1 | rs2032062   | S8  | NA        | 1.22E-14 | 4.98E-07    | 3.09E-11    | 8.48E-06 | 1           | 7.14E-03 |
| phe.Fasting_ | rs148116628 | S7 | DIAPH1 | rs2153597   | S8  | ZNF438    | 5.51E-11 | 0.00224928  | 7.42E-08    | 4.52E-09 | 0.183916    | 9.08E-06 |

|              |                |        |                |     |             |          |            |          |          |             |          |
|--------------|----------------|--------|----------------|-----|-------------|----------|------------|----------|----------|-------------|----------|
| phe.Fasting_ | rs148116628S7  | DIAPH1 | rs2835656      | S7  | TTC3        | 3.01E-10 | 1.23E-02   | 3.60E-07 | 9.12E-06 | 1           | 7.57E-03 |
| phe.Fasting_ | rs148116628S7  | DIAPH1 | rs34801978     | S3  | HOXB2       | 1.23E-05 | 1.00E+00   | 5.46E-03 | 1.03E-08 | 0.419057    | 1.90E-05 |
| phe.Fasting_ | rs148116628S7  | DIAPH1 | rs352346       | S3  | GRPEL2      | 1.85E-11 | 7.55E-04   | 2.78E-08 | 8.42E-06 | 1           | 7.10E-03 |
| phe.Fasting_ | rs148116628S7  | DIAPH1 | rs3750898      | S8  | DCLRE1A     | 2.29E-05 | 1.00E+00   | 9.35E-03 | 8.76E-06 | 1           | 7.32E-03 |
| phe.Fasting_ | rs148116628S7  | DIAPH1 | rs4732511      | S13 | POR         | 2.30E-15 | 9.39E-08   | 6.48E-12 | 9.65E-06 | 1           | 7.93E-03 |
| phe.Fasting_ | rs148116628S7  | DIAPH1 | rs57503635     | S3  | NA          | 6.34E-16 | 2.59E-08   | 1.95E-12 | 3.17E-14 | 1.29E-06    | 2.34E-10 |
| phe.Fasting_ | rs148116628S7  | DIAPH1 | rs58905476     | S7  | TTC3        | 3.29E-10 | 0.0134302  | 3.90E-07 | 9.79E-06 | 1           | 8.01E-03 |
| phe.Fasting_ | rs148116628S7  | DIAPH1 | rs60011869     | S16 | NA          | 1.04E-05 | 1          | 4.72E-03 | 8.16E-10 | 0.0332257   | 1.98E-06 |
| phe.Fasting_ | rs148116628S7  | DIAPH1 | rs6964407      | S7  | POR         | 7.55E-15 | 3.08E-07   | 1.94E-11 | 8.91E-06 | 1           | 7.43E-03 |
| phe.Fasting_ | rs148116628S7  | DIAPH1 | rs7004597      | S8  | NA          | 4.51E-15 | 1.84E-07   | 1.18E-11 | 2.34E-07 | 1           | 3.04E-04 |
| phe.Fasting_ | rs148116628S7  | DIAPH1 | rs7256517      | S7  | CYTH2       | 1.04E-15 | 4.24E-08   | 3.06E-12 | 4.82E-12 | 0.000196022 | 1.91E-08 |
| phe.Fasting_ | rs148116628S7  | DIAPH1 | rs73283603     | S7  | ZWINT       | 1.90E-06 | 1          | 1.07E-03 | 2.03E-07 | 1           | 2.68E-04 |
| phe.Fasting_ | rs148116628S7  | DIAPH1 | rs73392640     | S8  | POLR3B      | 2.02E-10 | 0.00826001 | 2.49E-07 | 5.19E-11 | 0.00211214  | 1.67E-07 |
| phe.Fasting_ | rs148116628S7  | DIAPH1 | rs734069       | S19 | NA          | 2.06E-08 | 0.839421   | 1.81E-05 | 6.71E-10 | 0.0272994   | 1.68E-06 |
| phe.Fasting_ | rs148116628S7  | DIAPH1 | rs73619637     | S8  | NA          | 1.44E-15 | 5.89E-08   | 4.14E-12 | 2.05E-10 | 0.00833668  | 5.78E-07 |
| phe.Fasting_ | rs148116628S7  | DIAPH1 | rs74627895     | S8  | TMEM64      | 7.32E-07 | 1          | 4.60E-04 | 2.03E-08 | 0.828094    | 3.48E-05 |
| phe.Fasting_ | rs148116628S7  | DIAPH1 | rs74914207     | S24 | NA          | 1.37E-10 | 0.00558626 | 1.73E-07 | 9.12E-11 | 0.0037135   | 2.80E-07 |
| phe.Fasting_ | rs148116628S7  | DIAPH1 | rs75350765     | S5  | RCL1        | 1.82E-16 | 7.42E-09   | 6.37E-13 | 3.70E-08 | 1           | 5.84E-05 |
| phe.Fasting_ | rs148116628S7  | DIAPH1 | rs75374128     | S5  | CNTLN       | 1.47E-16 | 6.01E-09   | 5.72E-13 | 1.01E-07 | 1           | 1.42E-04 |
| phe.Fasting_ | rs148116628S7  | DIAPH1 | rs75506779     | S5  | TMCO3       | 5.55E-07 | 1          | 3.61E-04 | 1.10E-08 | 0.449707    | 2.03E-05 |
| phe.Fasting_ | rs148116628S7  | DIAPH1 | rs75758702     | S24 | NA          | 7.02E-17 | 2.87E-09   | 3.16E-13 | 1.57E-10 | 0.00638323  | 4.59E-07 |
| phe.Fasting_ | rs148116628S7  | DIAPH1 | rs75864203     | S8  | CNTLN       | 1.47E-16 | 6.01E-09   | 5.72E-13 | 1.01E-07 | 1           | 1.42E-04 |
| phe.Fasting_ | rs148116628S7  | DIAPH1 | rs75949566     | S5  | TMEM64      | 2.76E-06 | 1          | 1.47E-03 | 8.48E-11 | 0.00345267  | 2.62E-07 |
| phe.Fasting_ | rs148116628S7  | DIAPH1 | rs76844308     | S8  | CNTLN       | 7.68E-17 | 3.14E-09   | 3.41E-13 | 9.52E-08 | 1           | 1.35E-04 |
| phe.Fasting_ | rs148116628S7  | DIAPH1 | rs7763107      | S8  | FARS2       | 5.78E-16 | 2.36E-08   | 1.79E-12 | 9.23E-12 | 0.000375564 | 3.44E-08 |
| phe.Fasting_ | rs148116628S7  | DIAPH1 | rs77798597     | S7  | KPNA3       | 2.97E-15 | 1.21E-07   | 8.14E-12 | 1.09E-13 | 4.44E-06    | 6.79E-10 |
| phe.Fasting_ | rs148116628S7  | DIAPH1 | rs77845645     | S21 | NA          | 1.53E-06 | 1          | 8.88E-04 | 4.20E-11 | 0.00170882  | 1.38E-07 |
| phe.Fasting_ | rs148116628S7  | DIAPH1 | rs78353402     | S8  | AP3M2       | 4.51E-15 | 1.84E-07   | 1.18E-11 | 3.87E-07 | 1           | 4.75E-04 |
| phe.Fasting_ | rs148116628S7  | DIAPH1 | rs78516788     | S8  | SLC38A1     | 2.75E-11 | 0.00112269 | 3.94E-08 | 2.44E-10 | 0.00992686  | 6.74E-07 |
| phe.Fasting_ | rs148116628S7  | DIAPH1 | rs78697063     | S5  | MSI2        | 8.23E-19 | 3.36E-11   | 2.70E-14 | 6.84E-10 | 0.0278369   | 1.70E-06 |
| phe.Fasting_ | rs148116628S7  | DIAPH1 | rs78722272     | S5  | CNTLN       | 1.47E-16 | 6.01E-09   | 5.72E-13 | 1.05E-07 | 1           | 1.48E-04 |
| phe.Fasting_ | rs148116628S7  | DIAPH1 | rs78736524     | S5  | KPNA3       | 2.97E-15 | 1.21E-07   | 8.14E-12 | 1.18E-13 | 4.80E-06    | 7.06E-10 |
| phe.Fasting_ | rs148116628S7  | DIAPH1 | rs78990344     | S2  | LOC10050631 | 2.37E-06 | 1          | 1.30E-03 | 6.78E-11 | 0.00276161  | 2.13E-07 |
| phe.Fasting_ | rs148116628S7  | DIAPH1 | rs79781495     | S8  | KPNA3       | 2.97E-15 | 1.21E-07   | 8.14E-12 | 1.09E-13 | 4.44E-06    | 6.79E-10 |
| phe.Fasting_ | rs148116628S7  | DIAPH1 | rs79886603     | S15 | NA          | 8.71E-08 | 1          | 6.74E-05 | 4.66E-07 | 1           | 5.59E-04 |
| phe.Fasting_ | rs148116628S7  | DIAPH1 | rs80200953     | S8  | PPP2R5D     | 8.49E-17 | 3.47E-09   | 3.69E-13 | 3.65E-09 | 0.148399    | 7.55E-06 |
| phe.Fasting_ | rs148116628S7  | DIAPH1 | rs80332465     | S5  | KPNA3       | 3.13E-15 | 1.28E-07   | 8.51E-12 | 1.17E-13 | 4.77E-06    | 7.06E-10 |
| phe.Fasting_ | rs148116628S7  | DIAPH1 | rs80334773     | S5  | KPNA3       | 3.13E-15 | 1.28E-07   | 8.51E-12 | 1.17E-13 | 4.77E-06    | 7.06E-10 |
| phe.Fasting_ | rs148210213S24 | NA     | rs114764631S23 |     | NA          | 2.82E-07 | 1          | 1.96E-04 | 4.13E-09 | 0.168229    | 8.45E-06 |
| phe.Fasting_ | rs148210213S24 | NA     | rs139070959S8  |     | RPN2        | 1.85E-09 | 0.0755239  | 1.94E-06 | 2.41E-06 | 1           | 2.43E-03 |

|                             |        |                 |             |          |             |            |          |             |          |
|-----------------------------|--------|-----------------|-------------|----------|-------------|------------|----------|-------------|----------|
| phe.Fasting_rs148210213 S24 | NA     | rs145412529 S8  | "RBL1,RPS3A | 1.03E-09 | 0.0420988   | 1.13E-06   | 2.51E-06 | 1           | 2.51E-03 |
| phe.Fasting_rs148423011 S7  | DIAPH1 | rs111576333 S5  | TMEM64      | 2.37E-06 | 1           | 1.30E-03   | 5.87E-14 | 2.39E-06    | 3.99E-10 |
| phe.Fasting_rs148423011 S7  | DIAPH1 | rs112089881 S8  | ZFAND4      | 2.04E-17 | 8.32E-10    | 1.43E-13   | 1.09E-09 | 0.0445256   | 2.58E-06 |
| phe.Fasting_rs148423011 S7  | DIAPH1 | rs112091318 S5  | TMEM64      | 7.32E-07 | 1           | 4.60E-04   | 3.91E-08 | 1           | 6.13E-05 |
| phe.Fasting_rs148423011 S7  | DIAPH1 | rs114334325 S7  | AP3M2       | 4.51E-15 | 1.84E-07    | 1.18E-11   | 3.87E-07 | 1           | 4.75E-04 |
| phe.Fasting_rs148423011 S7  | DIAPH1 | rs114394395 S7  | AP3M2       | 4.81E-15 | 1.97E-07    | 1.25E-11   | 3.87E-07 | 1           | 4.75E-04 |
| phe.Fasting_rs148423011 S7  | DIAPH1 | rs114565620 S8  | RCL1        | 1.82E-16 | 7.42E-09    | 6.37E-13   | 3.70E-08 | 1           | 5.84E-05 |
| phe.Fasting_rs148423011 S7  | DIAPH1 | rs115083290 S19 | NA          | 4.38E-16 | 1.79E-08    | 1.40E-12   | 1.42E-08 | 0.576679    | 2.53E-05 |
| phe.Fasting_rs148423011 S7  | DIAPH1 | rs11524145 S5   | CDK6        | 7.80E-07 | 1.00E+00    | 4.86E-04   | 7.89E-06 | 1           | 6.69E-03 |
| phe.Fasting_rs148423011 S7  | DIAPH1 | rs115752779 S19 | NA          | 4.38E-16 | 1.79E-08    | 1.40E-12   | 1.42E-08 | 0.576679    | 2.53E-05 |
| phe.Fasting_rs148423011 S7  | DIAPH1 | rs115787552 S5  | KPNA3       | 2.97E-15 | 1.21E-07    | 8.14E-12   | 1.18E-13 | 4.80E-06    | 7.06E-10 |
| phe.Fasting_rs148423011 S7  | DIAPH1 | rs115888477 S8  | NA          | 2.03E-14 | 8.28E-07    | 5.02E-11   | 2.21E-14 | 8.99E-07    | 1.73E-10 |
| phe.Fasting_rs148423011 S7  | DIAPH1 | rs116011837 S9  | BRD2        | 4.89E-11 | 2.00E-03    | 6.62E-08   | 4.07E-14 | 1.66E-06    | 2.85E-10 |
| phe.Fasting_rs148423011 S7  | DIAPH1 | rs116079984 S8  | KPNA3       | 2.97E-15 | 1.21E-07    | 8.14E-12   | 1.24E-13 | 5.04E-06    | 7.34E-10 |
| phe.Fasting_rs148423011 S7  | DIAPH1 | rs116120727 S9  | BRD2        | 4.89E-11 | 2.00E-03    | 6.62E-08   | 4.07E-14 | 1.66E-06    | 2.85E-10 |
| phe.Fasting_rs148423011 S7  | DIAPH1 | rs116406581 S2  | NA          | 1.81E-14 | 7.39E-07    | 4.52E-11   | 2.35E-07 | 1           | 3.05E-04 |
| phe.Fasting_rs148423011 S7  | DIAPH1 | rs116548615 S8  | TMEM45B     | 1.73E-16 | 7.06E-09    | 6.15E-13   | 8.70E-12 | 0.000354153 | 3.26E-08 |
| phe.Fasting_rs148423011 S7  | DIAPH1 | rs116696844 S3  | AP3M2       | 6.92E-15 | 2.83E-07    | 1.78E-11   | 3.87E-07 | 1           | 4.75E-04 |
| phe.Fasting_rs148423011 S7  | DIAPH1 | rs11989304 S4   | TMEM64      | 2.37E-06 | 1.00E+00    | 1.30E-03   | 6.78E-11 | 0.00276161  | 2.13E-07 |
| phe.Fasting_rs148423011 S7  | DIAPH1 | rs140524622 S7  | MRPL10      | 1.08E-16 | 4.41E-09    | 4.54E-13   | 7.35E-06 | 1           | 6.31E-03 |
| phe.Fasting_rs148423011 S7  | DIAPH1 | rs146815317 S5  | KPNA3       | 2.97E-15 | 1.21E-07    | 8.14E-12   | 1.18E-13 | 4.80E-06    | 7.06E-10 |
| phe.Fasting_rs148423011 S7  | DIAPH1 | rs150117838 S8  | KPNA3       | 2.97E-15 | 1.21E-07    | 8.14E-12   | 1.09E-13 | 4.44E-06    | 6.79E-10 |
| phe.Fasting_rs148423011 S7  | DIAPH1 | rs150916187 S4  | HIST1H2BK   | 1.38E-05 | 1           | 0.00605332 | 1.37E-14 | 5.59E-07    | 1.16E-10 |
| phe.Fasting_rs148423011 S7  | DIAPH1 | rs16894241 S4   | HIST1H2BK   | 1.99E-11 | 0.000812315 | 2.96E-08   | 3.44E-14 | 1.40E-06    | 2.50E-10 |
| phe.Fasting_rs148423011 S7  | DIAPH1 | rs2032062 S8    | NA          | 1.22E-14 | 4.98E-07    | 3.09E-11   | 8.48E-06 | 1           | 7.14E-03 |
| phe.Fasting_rs148423011 S7  | DIAPH1 | rs2153597 S8    | ZNF438      | 5.51E-11 | 0.00224928  | 7.42E-08   | 4.52E-09 | 0.183916    | 9.08E-06 |
| phe.Fasting_rs148423011 S7  | DIAPH1 | rs2835656 S7    | TTC3        | 3.01E-10 | 0.0122766   | 3.60E-07   | 9.12E-06 | 1           | 7.57E-03 |
| phe.Fasting_rs148423011 S7  | DIAPH1 | rs34801978 S3   | HOXB2       | 1.23E-05 | 1           | 0.00545724 | 1.03E-08 | 0.419057    | 1.90E-05 |
| phe.Fasting_rs148423011 S7  | DIAPH1 | rs352346 S3     | GRPEL2      | 1.85E-11 | 0.000754995 | 2.78E-08   | 8.42E-06 | 1           | 7.10E-03 |
| phe.Fasting_rs148423011 S7  | DIAPH1 | rs3750898 S8    | DCLRE1A     | 2.29E-05 | 1           | 0.0093502  | 8.76E-06 | 1           | 7.32E-03 |
| phe.Fasting_rs148423011 S7  | DIAPH1 | rs4732511 S13   | POR         | 2.30E-15 | 9.39E-08    | 6.48E-12   | 9.65E-06 | 1           | 7.93E-03 |
| phe.Fasting_rs148423011 S7  | DIAPH1 | rs57503635 S3   | NA          | 6.34E-16 | 2.59E-08    | 1.95E-12   | 3.17E-14 | 1.29E-06    | 2.34E-10 |
| phe.Fasting_rs148423011 S7  | DIAPH1 | rs58905476 S7   | TTC3        | 3.29E-10 | 0.0134302   | 3.90E-07   | 9.79E-06 | 1           | 8.01E-03 |
| phe.Fasting_rs148423011 S7  | DIAPH1 | rs60011869 S16  | NA          | 1.04E-05 | 1           | 0.00472365 | 8.16E-10 | 0.0332257   | 1.98E-06 |
| phe.Fasting_rs148423011 S7  | DIAPH1 | rs6964407 S7    | POR         | 7.55E-15 | 3.08E-07    | 1.94E-11   | 8.91E-06 | 1           | 7.43E-03 |
| phe.Fasting_rs148423011 S7  | DIAPH1 | rs7004597 S8    | NA          | 4.51E-15 | 1.84E-07    | 1.18E-11   | 2.34E-07 | 1           | 3.04E-04 |
| phe.Fasting_rs148423011 S7  | DIAPH1 | rs7256517 S7    | CYTH2       | 1.04E-15 | 4.24E-08    | 3.06E-12   | 4.82E-12 | 0.000196022 | 1.91E-08 |
| phe.Fasting_rs148423011 S7  | DIAPH1 | rs73283603 S7   | ZWINT       | 1.90E-06 | 1           | 0.0010688  | 2.03E-07 | 1           | 2.68E-04 |
| phe.Fasting_rs148423011 S7  | DIAPH1 | rs73392640 S8   | POLR3B      | 2.02E-10 | 0.00826001  | 2.49E-07   | 5.19E-11 | 0.00211214  | 1.67E-07 |
| phe.Fasting_rs148423011 S7  | DIAPH1 | rs734069 S19    | NA          | 2.06E-08 | 0.839421    | 1.81E-05   | 6.71E-10 | 0.0272994   | 1.68E-06 |

|                           |        |             |     |             |          |             |             |          |             |          |
|---------------------------|--------|-------------|-----|-------------|----------|-------------|-------------|----------|-------------|----------|
| phe.Fasting_rs148423011S7 | DIAPH1 | rs73619637  | S8  | NA          | 1.44E-15 | 5.89E-08    | 4.14E-12    | 2.05E-10 | 0.00833668  | 5.78E-07 |
| phe.Fasting_rs148423011S7 | DIAPH1 | rs74627895  | S8  | TMEM64      | 7.32E-07 | 1           | 0.000459899 | 2.03E-08 | 0.828094    | 3.48E-05 |
| phe.Fasting_rs148423011S7 | DIAPH1 | rs74914207  | S24 | NA          | 1.37E-10 | 0.00558626  | 1.73E-07    | 9.12E-11 | 0.0037135   | 2.80E-07 |
| phe.Fasting_rs148423011S7 | DIAPH1 | rs75350765  | S5  | RCL1        | 1.82E-16 | 7.42E-09    | 6.37E-13    | 3.70E-08 | 1           | 5.84E-05 |
| phe.Fasting_rs148423011S7 | DIAPH1 | rs75374128  | S5  | CNTLN       | 1.47E-16 | 6.01E-09    | 5.72E-13    | 1.01E-07 | 1           | 1.42E-04 |
| phe.Fasting_rs148423011S7 | DIAPH1 | rs75506779  | S5  | TMCO3       | 5.55E-07 | 1           | 0.000360863 | 1.10E-08 | 0.449707    | 2.03E-05 |
| phe.Fasting_rs148423011S7 | DIAPH1 | rs75758702  | S24 | NA          | 7.02E-17 | 2.87E-09    | 3.16E-13    | 1.57E-10 | 0.00638323  | 4.59E-07 |
| phe.Fasting_rs148423011S7 | DIAPH1 | rs75864203  | S8  | CNTLN       | 1.47E-16 | 6.01E-09    | 5.72E-13    | 1.01E-07 | 1           | 1.42E-04 |
| phe.Fasting_rs148423011S7 | DIAPH1 | rs75949566  | S5  | TMEM64      | 2.76E-06 | 1           | 0.001473    | 8.48E-11 | 0.00345267  | 2.62E-07 |
| phe.Fasting_rs148423011S7 | DIAPH1 | rs76844308  | S8  | CNTLN       | 7.68E-17 | 3.14E-09    | 3.41E-13    | 9.52E-08 | 1           | 1.35E-04 |
| phe.Fasting_rs148423011S7 | DIAPH1 | rs7763107   | S8  | FARS2       | 5.78E-16 | 2.36E-08    | 1.79E-12    | 9.23E-12 | 0.000375564 | 3.44E-08 |
| phe.Fasting_rs148423011S7 | DIAPH1 | rs77798597  | S7  | KPNA3       | 2.97E-15 | 1.21E-07    | 8.14E-12    | 1.09E-13 | 4.44E-06    | 6.79E-10 |
| phe.Fasting_rs148423011S7 | DIAPH1 | rs77845645  | S21 | NA          | 1.53E-06 | 1           | 0.000888475 | 4.20E-11 | 0.00170882  | 1.38E-07 |
| phe.Fasting_rs148423011S7 | DIAPH1 | rs78353402  | S8  | AP3M2       | 4.51E-15 | 1.84E-07    | 1.18E-11    | 3.87E-07 | 1           | 4.75E-04 |
| phe.Fasting_rs148423011S7 | DIAPH1 | rs78516788  | S8  | SLC38A1     | 2.75E-11 | 0.00112269  | 3.94E-08    | 2.44E-10 | 0.00992686  | 6.74E-07 |
| phe.Fasting_rs148423011S7 | DIAPH1 | rs78697063  | S5  | MSI2        | 8.23E-19 | 3.36E-11    | 2.70E-14    | 6.84E-10 | 0.0278369   | 1.70E-06 |
| phe.Fasting_rs148423011S7 | DIAPH1 | rs78722272  | S5  | CNTLN       | 1.47E-16 | 6.01E-09    | 5.72E-13    | 1.05E-07 | 1           | 1.48E-04 |
| phe.Fasting_rs148423011S7 | DIAPH1 | rs78736524  | S5  | KPNA3       | 2.97E-15 | 1.21E-07    | 8.14E-12    | 1.18E-13 | 4.80E-06    | 7.06E-10 |
| phe.Fasting_rs148423011S7 | DIAPH1 | rs78990344  | S2  | LOC10050631 | 2.37E-06 | 1           | 0.00129547  | 6.78E-11 | 0.00276161  | 2.13E-07 |
| phe.Fasting_rs148423011S7 | DIAPH1 | rs79781495  | S8  | KPNA3       | 2.97E-15 | 1.21E-07    | 8.14E-12    | 1.09E-13 | 4.44E-06    | 6.79E-10 |
| phe.Fasting_rs148423011S7 | DIAPH1 | rs79886603  | S15 | NA          | 8.71E-08 | 1           | 6.74E-05    | 4.66E-07 | 1           | 5.59E-04 |
| phe.Fasting_rs148423011S7 | DIAPH1 | rs80200953  | S8  | PPP2R5D     | 8.49E-17 | 3.47E-09    | 3.69E-13    | 3.65E-09 | 0.148399    | 7.55E-06 |
| phe.Fasting_rs148423011S7 | DIAPH1 | rs80332465  | S5  | KPNA3       | 3.13E-15 | 1.28E-07    | 8.51E-12    | 1.17E-13 | 4.77E-06    | 7.06E-10 |
| phe.Fasting_rs148423011S7 | DIAPH1 | rs80334773  | S5  | KPNA3       | 3.13E-15 | 1.28E-07    | 8.51E-12    | 1.17E-13 | 4.77E-06    | 7.06E-10 |
| phe.Fasting_rs149019627S8 | DIAPH1 | rs111576333 | S5  | TMEM64      | 5.56E-07 | 1           | 0.000361481 | 7.80E-15 | 3.17E-07    | 6.90E-11 |
| phe.Fasting_rs149019627S8 | DIAPH1 | rs112089881 | S8  | ZFAND4      | 3.24E-18 | 1.32E-10    | 5.45E-14    | 1.95E-10 | 0.00795558  | 5.56E-07 |
| phe.Fasting_rs149019627S8 | DIAPH1 | rs112091318 | S5  | TMEM64      | 1.64E-07 | 1           | 0.000118218 | 9.13E-09 | 0.371559    | 1.72E-05 |
| phe.Fasting_rs149019627S8 | DIAPH1 | rs114334325 | S7  | AP3M2       | 1.25E-15 | 5.12E-08    | 3.65E-12    | 8.81E-08 | 1           | 1.26E-04 |
| phe.Fasting_rs149019627S8 | DIAPH1 | rs114394395 | S7  | AP3M2       | 1.33E-15 | 5.44E-08    | 3.85E-12    | 8.81E-08 | 1           | 1.26E-04 |
| phe.Fasting_rs149019627S8 | DIAPH1 | rs114565620 | S8  | RCL1        | 2.03E-17 | 8.30E-10    | 1.43E-13    | 8.23E-09 | 0.335069    | 1.57E-05 |
| phe.Fasting_rs149019627S8 | DIAPH1 | rs115083290 | S19 | NA          | 8.17E-17 | 3.34E-09    | 3.58E-13    | 2.77E-09 | 0.11274     | 5.90E-06 |
| phe.Fasting_rs149019627S8 | DIAPH1 | rs115752779 | S19 | NA          | 8.17E-17 | 3.34E-09    | 3.58E-13    | 2.77E-09 | 0.11274     | 5.90E-06 |
| phe.Fasting_rs149019627S8 | DIAPH1 | rs115787552 | S5  | KPNA3       | 5.05E-16 | 2.06E-08    | 1.59E-12    | 2.34E-14 | 9.53E-07    | 1.79E-10 |
| phe.Fasting_rs149019627S8 | DIAPH1 | rs115888477 | S8  | NA          | 3.68E-15 | 1.50E-07    | 9.90E-12    | 4.11E-15 | 1.67E-07    | 3.84E-11 |
| phe.Fasting_rs149019627S8 | DIAPH1 | rs116011837 | S9  | BRD2        | 9.60E-12 | 0.000392176 | 1.53E-08    | 9.05E-15 | 3.68E-07    | 7.90E-11 |
| phe.Fasting_rs149019627S8 | DIAPH1 | rs116079984 | S8  | KPNA3       | 5.05E-16 | 2.06E-08    | 1.59E-12    | 2.56E-14 | 1.04E-06    | 1.94E-10 |
| phe.Fasting_rs149019627S8 | DIAPH1 | rs116120727 | S9  | BRD2        | 9.60E-12 | 0.000392176 | 1.53E-08    | 9.05E-15 | 3.68E-07    | 7.90E-11 |
| phe.Fasting_rs149019627S8 | DIAPH1 | rs116406581 | S2  | NA          | 5.24E-15 | 2.14E-07    | 1.36E-11    | 5.32E-08 | 1           | 8.11E-05 |
| phe.Fasting_rs149019627S8 | DIAPH1 | rs116548615 | S8  | TMEM45B     | 2.95E-17 | 1.21E-09    | 1.69E-13    | 1.76E-12 | 7.17E-05    | 7.72E-09 |
| phe.Fasting_rs149019627S8 | DIAPH1 | rs116696844 | S3  | AP3M2       | 1.90E-15 | 7.75E-08    | 5.41E-12    | 8.81E-08 | 1           | 1.26E-04 |



|                            |        |                |            |          |             |             |          |             |          |
|----------------------------|--------|----------------|------------|----------|-------------|-------------|----------|-------------|----------|
| phe.Fasting_rs149019627 S8 | DIAPH1 | rs11989304 S4  | TMEM64     | 5.56E-07 | 1           | 0.000361481 | 1.11E-11 | 0.000453381 | 4.10E-08 |
| phe.Fasting_rs149019627 S8 | DIAPH1 | rs140524622 S7 | MRPL10     | 1.81E-17 | 7.37E-10    | 1.32E-13    | 2.83E-06 | 1           | 2.79E-03 |
| phe.Fasting_rs149019627 S8 | DIAPH1 | rs146815317 S5 | KPNA3      | 5.05E-16 | 2.06E-08    | 1.59E-12    | 2.34E-14 | 9.53E-07    | 1.79E-10 |
| phe.Fasting_rs149019627 S8 | DIAPH1 | rs150117838 S8 | KPNA3      | 5.05E-16 | 2.06E-08    | 1.59E-12    | 2.16E-14 | 8.80E-07    | 1.71E-10 |
| phe.Fasting_rs149019627 S8 | DIAPH1 | rs150916187 S4 | HIST1H2BK  | 4.14E-06 | 1           | 0.00210616  | 2.61E-15 | 1.06E-07    | 2.55E-11 |
| phe.Fasting_rs149019627 S8 | DIAPH1 | rs16894241 S4  | HIST1H2BK  | 3.73E-12 | 0.000152384 | 6.73E-09    | 6.62E-15 | 2.69E-07    | 5.94E-11 |
| phe.Fasting_rs149019627 S8 | DIAPH1 | rs34801978 S3  | HOXB2      | 2.19E-06 | 1           | 0.00120758  | 1.65E-09 | 0.0670533   | 3.72E-06 |
| phe.Fasting_rs149019627 S8 | DIAPH1 | rs4732511 S13  | POR        | 9.61E-15 | 3.93E-07    | 2.45E-11    | 2.36E-06 | 1           | 2.39E-03 |
| phe.Fasting_rs149019627 S8 | DIAPH1 | rs57503635 S3  | NA         | 1.28E-16 | 5.23E-09    | 5.19E-13    | 6.61E-15 | 2.69E-07    | 5.94E-11 |
| phe.Fasting_rs149019627 S8 | DIAPH1 | rs60011869 S16 | NA         | 2.13E-06 | 1           | 0.00118391  | 1.78E-07 | 1           | 2.39E-04 |
| phe.Fasting_rs149019627 S8 | DIAPH1 | rs6964407 S7   | POR        | 3.32E-14 | 1.36E-06    | 8.04E-11    | 2.16E-06 | 1           | 2.22E-03 |
| phe.Fasting_rs149019627 S8 | DIAPH1 | rs7004597 S8   | NA         | 1.25E-15 | 5.12E-08    | 3.65E-12    | 5.12E-08 | 1           | 7.84E-05 |
| phe.Fasting_rs149019627 S8 | DIAPH1 | rs7256517 S7   | CYTH2      | 1.59E-16 | 6.48E-09    | 6.03E-13    | 9.69E-13 | 3.95E-05    | 4.59E-09 |
| phe.Fasting_rs149019627 S8 | DIAPH1 | rs73283603 S7  | ZWINT      | 4.49E-07 | 1           | 0.000297012 | 4.53E-08 | 1           | 7.02E-05 |
| phe.Fasting_rs149019627 S8 | DIAPH1 | rs73392640 S8  | POLR3B     | 4.58E-11 | 0.00187102  | 6.24E-08    | 6.82E-12 | 0.000277641 | 2.62E-08 |
| phe.Fasting_rs149019627 S8 | DIAPH1 | rs73619637 S8  | NA         | 2.00E-16 | 8.15E-09    | 6.95E-13    | 6.35E-08 | 1           | 9.54E-05 |
| phe.Fasting_rs149019627 S8 | DIAPH1 | rs74627895 S8  | TMEM64     | 1.64E-07 | 1           | 0.000118218 | 4.42E-09 | 0.179944    | 8.98E-06 |
| phe.Fasting_rs149019627 S8 | DIAPH1 | rs74914207 S24 | NA         | 2.89E-11 | 0.00117833  | 4.13E-08    | 1.56E-11 | 0.000634366 | 5.60E-08 |
| phe.Fasting_rs149019627 S8 | DIAPH1 | rs75350765 S5  | RCL1       | 2.03E-17 | 8.30E-10    | 1.43E-13    | 8.23E-09 | 0.335069    | 1.57E-05 |
| phe.Fasting_rs149019627 S8 | DIAPH1 | rs75374128 S5  | CNTLN      | 5.25E-06 | 1           | 0.00259743  | 1.83E-08 | 0.746586    | 3.18E-05 |
| phe.Fasting_rs149019627 S8 | DIAPH1 | rs75506779 S5  | TMCO3      | 1.04E-07 | 1           | 7.88E-05    | 2.32E-09 | 0.0942949   | 5.04E-06 |
| phe.Fasting_rs149019627 S8 | DIAPH1 | rs75758702 S24 | NA         | 1.04E-17 | 4.25E-10    | 9.89E-14    | 2.85E-11 | 0.00115844  | 9.77E-08 |
| phe.Fasting_rs149019627 S8 | DIAPH1 | rs75864203 S8  | CNTLN      | 5.25E-06 | 1           | 0.00259743  | 1.83E-08 | 0.746586    | 3.18E-05 |
| phe.Fasting_rs149019627 S8 | DIAPH1 | rs75949566 S5  | TMEM64     | 6.52E-07 | 1           | 0.000415514 | 1.49E-11 | 0.000607747 | 5.38E-08 |
| phe.Fasting_rs149019627 S8 | DIAPH1 | rs76844308 S8  | CNTLN      | 2.67E-06 | 1           | 0.00143908  | 1.80E-08 | 0.73432     | 3.14E-05 |
| phe.Fasting_rs149019627 S8 | DIAPH1 | rs7763107 S8   | FARS2      | 9.44E-17 | 3.86E-09    | 4.06E-13    | 1.60E-12 | 6.52E-05    | 7.13E-09 |
| phe.Fasting_rs149019627 S8 | DIAPH1 | rs77798597 S7  | KPNA3      | 5.05E-16 | 2.06E-08    | 1.59E-12    | 2.16E-14 | 8.80E-07    | 1.71E-10 |
| phe.Fasting_rs149019627 S8 | DIAPH1 | rs77845645 S21 | NA         | 3.35E-07 | 1           | 0.000229183 | 1.04E-11 | 0.000424266 | 3.85E-08 |
| phe.Fasting_rs149019627 S8 | DIAPH1 | rs78353402 S8  | AP3M2      | 1.25E-15 | 5.12E-08    | 3.65E-12    | 8.81E-08 | 1           | 1.26E-04 |
| phe.Fasting_rs149019627 S8 | DIAPH1 | rs78516788 S8  | SLC38A1    | 1.24E-06 | 1           | 0.000737575 | 2.76E-09 | 0.112313    | 5.89E-06 |
| phe.Fasting_rs149019627 S8 | DIAPH1 | rs78697063 S5  | MSI2       | 7.77E-20 | 3.17E-12    | 2.23E-14    | 1.45E-10 | 0.00591847  | 4.35E-07 |
| phe.Fasting_rs149019627 S8 | DIAPH1 | rs78703708 S7  | FAF2       | 7.40E-12 | 0.000302252 | 1.27E-08    | 7.08E-06 | 1           | 6.12E-03 |
| phe.Fasting_rs149019627 S8 | DIAPH1 | rs78722272 S5  | CNTLN      | 5.25E-06 | 1           | 0.00259743  | 1.89E-08 | 0.767323    | 3.26E-05 |
| phe.Fasting_rs149019627 S8 | DIAPH1 | rs78736524 S5  | KPNA3      | 5.05E-16 | 2.06E-08    | 1.59E-12    | 2.34E-14 | 9.53E-07    | 1.79E-10 |
| phe.Fasting_rs149019627 S8 | DIAPH1 | rs78990344 S2  | LOC1005063 | 5.56E-07 | 1           | 0.000361481 | 1.11E-11 | 0.000453381 | 4.10E-08 |
| phe.Fasting_rs149019627 S8 | DIAPH1 | rs79781495 S8  | KPNA3      | 5.05E-16 | 2.06E-08    | 1.59E-12    | 2.16E-14 | 8.80E-07    | 1.71E-10 |
| phe.Fasting_rs149019627 S8 | DIAPH1 | rs80200953 S8  | PPP2R5D    | 1.41E-17 | 5.76E-10    | 1.14E-13    | 8.37E-10 | 0.034062    | 2.03E-06 |
| phe.Fasting_rs149019627 S8 | DIAPH1 | rs80332465 S5  | KPNA3      | 5.36E-16 | 2.19E-08    | 1.67E-12    | 2.32E-14 | 9.45E-07    | 1.79E-10 |
| phe.Fasting_rs149019627 S8 | DIAPH1 | rs80334773 S5  | KPNA3      | 5.36E-16 | 2.19E-08    | 1.67E-12    | 2.32E-14 | 9.45E-07    | 1.79E-10 |
| phe.Fasting_rs149019627 S8 | DIAPH1 | rs891061 S7    | POP4       | 6.59E-07 | 1           | 0.000419527 | 1.19E-05 | 1           | 9.35E-03 |

|                           |        |                |           |          |             |             |          |             |          |
|---------------------------|--------|----------------|-----------|----------|-------------|-------------|----------|-------------|----------|
| phe.Fasting_rs149075406S8 | DIAPH1 | rs111576333S5  | TMEM64    | 2.37E-06 | 1           | 0.00129547  | 5.87E-14 | 2.39E-06    | 3.99E-10 |
| phe.Fasting_rs149075406S8 | DIAPH1 | rs112089881S8  | ZFAND4    | 2.04E-17 | 8.32E-10    | 1.43E-13    | 1.09E-09 | 0.0445256   | 2.58E-06 |
| phe.Fasting_rs149075406S8 | DIAPH1 | rs112091318S5  | TMEM64    | 7.32E-07 | 1           | 0.000459899 | 3.91E-08 | 1           | 6.13E-05 |
| phe.Fasting_rs149075406S8 | DIAPH1 | rs114334325S7  | AP3M2     | 4.51E-15 | 1.84E-07    | 1.18E-11    | 3.87E-07 | 1           | 4.75E-04 |
| phe.Fasting_rs149075406S8 | DIAPH1 | rs114394395S7  | AP3M2     | 4.81E-15 | 1.97E-07    | 1.25E-11    | 3.87E-07 | 1           | 4.75E-04 |
| phe.Fasting_rs149075406S8 | DIAPH1 | rs114565620S8  | RCL1      | 1.82E-16 | 7.42E-09    | 6.37E-13    | 3.70E-08 | 1           | 5.84E-05 |
| phe.Fasting_rs149075406S8 | DIAPH1 | rs115083290S19 | NA        | 4.38E-16 | 1.79E-08    | 1.40E-12    | 1.42E-08 | 0.576679    | 2.53E-05 |
| phe.Fasting_rs149075406S8 | DIAPH1 | rs11524145S5   | CDK6      | 7.80E-07 | 1           | 0.000486356 | 7.89E-06 | 1           | 6.69E-03 |
| phe.Fasting_rs149075406S8 | DIAPH1 | rs115752779S19 | NA        | 4.38E-16 | 1.79E-08    | 1.40E-12    | 1.42E-08 | 0.576679    | 2.53E-05 |
| phe.Fasting_rs149075406S8 | DIAPH1 | rs115787552S5  | KPNA3     | 2.97E-15 | 1.21E-07    | 8.14E-12    | 1.18E-13 | 4.80E-06    | 7.06E-10 |
| phe.Fasting_rs149075406S8 | DIAPH1 | rs115888477S8  | NA        | 2.03E-14 | 8.28E-07    | 5.02E-11    | 2.21E-14 | 8.99E-07    | 1.73E-10 |
| phe.Fasting_rs149075406S8 | DIAPH1 | rs116011837S9  | BRD2      | 4.89E-11 | 0.00199774  | 6.62E-08    | 4.07E-14 | 1.66E-06    | 2.85E-10 |
| phe.Fasting_rs149075406S8 | DIAPH1 | rs116079984S8  | KPNA3     | 2.97E-15 | 1.21E-07    | 8.14E-12    | 1.24E-13 | 5.04E-06    | 7.34E-10 |
| phe.Fasting_rs149075406S8 | DIAPH1 | rs116120727S9  | BRD2      | 4.89E-11 | 0.00199774  | 6.62E-08    | 4.07E-14 | 1.66E-06    | 2.85E-10 |
| phe.Fasting_rs149075406S8 | DIAPH1 | rs116406581S2  | NA        | 1.81E-14 | 7.39E-07    | 4.52E-11    | 2.35E-07 | 1           | 3.05E-04 |
| phe.Fasting_rs149075406S8 | DIAPH1 | rs116548615S8  | TMEM45B   | 1.73E-16 | 7.06E-09    | 6.15E-13    | 8.70E-12 | 0.000354153 | 3.26E-08 |
| phe.Fasting_rs149075406S8 | DIAPH1 | rs116696844S3  | AP3M2     | 6.92E-15 | 2.83E-07    | 1.78E-11    | 3.87E-07 | 1           | 4.75E-04 |
| phe.Fasting_rs149075406S8 | DIAPH1 | rs11989304S4   | TMEM64    | 2.37E-06 | 1           | 0.00129547  | 6.78E-11 | 0.00276161  | 2.13E-07 |
| phe.Fasting_rs149075406S8 | DIAPH1 | rs140524622S7  | MRPL10    | 1.08E-16 | 4.41E-09    | 4.54E-13    | 7.35E-06 | 1           | 6.31E-03 |
| phe.Fasting_rs149075406S8 | DIAPH1 | rs146815317S5  | KPNA3     | 2.97E-15 | 1.21E-07    | 8.14E-12    | 1.18E-13 | 4.80E-06    | 7.06E-10 |
| phe.Fasting_rs149075406S8 | DIAPH1 | rs150117838S8  | KPNA3     | 2.97E-15 | 1.21E-07    | 8.14E-12    | 1.09E-13 | 4.44E-06    | 6.79E-10 |
| phe.Fasting_rs149075406S8 | DIAPH1 | rs150916187S4  | HIST1H2BK | 1.38E-05 | 1           | 0.00605332  | 1.37E-14 | 5.59E-07    | 1.16E-10 |
| phe.Fasting_rs149075406S8 | DIAPH1 | rs16894241S4   | HIST1H2BK | 1.99E-11 | 0.000812315 | 2.96E-08    | 3.44E-14 | 1.40E-06    | 2.50E-10 |
| phe.Fasting_rs149075406S8 | DIAPH1 | rs2032062S8    | NA        | 1.22E-14 | 4.98E-07    | 3.09E-11    | 8.48E-06 | 1           | 7.14E-03 |
| phe.Fasting_rs149075406S8 | DIAPH1 | rs2153597S8    | ZNF438    | 5.51E-11 | 0.00224928  | 7.42E-08    | 4.52E-09 | 0.183916    | 9.08E-06 |
| phe.Fasting_rs149075406S8 | DIAPH1 | rs2835656S7    | TTC3      | 3.01E-10 | 0.0122766   | 3.60E-07    | 9.12E-06 | 1           | 7.57E-03 |
| phe.Fasting_rs149075406S8 | DIAPH1 | rs34801978S3   | HOXB2     | 1.23E-05 | 1           | 0.00545724  | 1.03E-08 | 0.419057    | 1.90E-05 |
| phe.Fasting_rs149075406S8 | DIAPH1 | rs352346S3     | GRPEL2    | 1.85E-11 | 0.000754995 | 2.78E-08    | 8.42E-06 | 1           | 7.10E-03 |
| phe.Fasting_rs149075406S8 | DIAPH1 | rs3750898S8    | DCLRE1A   | 2.29E-05 | 1           | 0.0093502   | 8.76E-06 | 1           | 7.32E-03 |
| phe.Fasting_rs149075406S8 | DIAPH1 | rs4732511S13   | POR       | 2.30E-15 | 9.39E-08    | 6.48E-12    | 9.65E-06 | 1           | 7.93E-03 |
| phe.Fasting_rs149075406S8 | DIAPH1 | rs57503635S3   | NA        | 6.34E-16 | 2.59E-08    | 1.95E-12    | 3.17E-14 | 1.29E-06    | 2.34E-10 |
| phe.Fasting_rs149075406S8 | DIAPH1 | rs58905476S7   | TTC3      | 3.29E-10 | 0.0134302   | 3.90E-07    | 9.79E-06 | 1           | 8.01E-03 |
| phe.Fasting_rs149075406S8 | DIAPH1 | rs60011869S16  | NA        | 1.04E-05 | 1           | 0.00472365  | 8.16E-10 | 0.0332257   | 1.98E-06 |
| phe.Fasting_rs149075406S8 | DIAPH1 | rs6964407S7    | POR       | 7.55E-15 | 3.08E-07    | 1.94E-11    | 8.91E-06 | 1           | 7.43E-03 |
| phe.Fasting_rs149075406S8 | DIAPH1 | rs7004597S8    | NA        | 4.51E-15 | 1.84E-07    | 1.18E-11    | 2.34E-07 | 1           | 3.04E-04 |
| phe.Fasting_rs149075406S8 | DIAPH1 | rs7256517S7    | CYTH2     | 1.04E-15 | 4.24E-08    | 3.06E-12    | 4.82E-12 | 0.000196022 | 1.91E-08 |
| phe.Fasting_rs149075406S8 | DIAPH1 | rs73283603S7   | ZWINT     | 1.90E-06 | 1           | 0.0010688   | 2.03E-07 | 1           | 2.68E-04 |
| phe.Fasting_rs149075406S8 | DIAPH1 | rs73392640S8   | POLR3B    | 2.02E-10 | 0.00826001  | 2.49E-07    | 5.19E-11 | 0.00211214  | 1.67E-07 |
| phe.Fasting_rs149075406S8 | DIAPH1 | rs734069S19    | NA        | 2.06E-08 | 0.839421    | 1.81E-05    | 6.71E-10 | 0.0272994   | 1.68E-06 |
| phe.Fasting_rs149075406S8 | DIAPH1 | rs73619637S8   | NA        | 1.44E-15 | 5.89E-08    | 4.14E-12    | 2.05E-10 | 0.00833668  | 5.78E-07 |

|                           |        |             |     |            |          |            |             |          |             |          |
|---------------------------|--------|-------------|-----|------------|----------|------------|-------------|----------|-------------|----------|
| phe.Fasting_rs149075406S8 | DIAPH1 | rs74627895  | S8  | TMEM64     | 7.32E-07 | 1          | 0.000459899 | 2.03E-08 | 0.828094    | 3.48E-05 |
| phe.Fasting_rs149075406S8 | DIAPH1 | rs74914207  | S24 | NA         | 1.37E-10 | 0.00558626 | 1.73E-07    | 9.12E-11 | 0.0037135   | 2.80E-07 |
| phe.Fasting_rs149075406S8 | DIAPH1 | rs75350765  | S5  | RCL1       | 1.82E-16 | 7.42E-09   | 6.37E-13    | 3.70E-08 | 1           | 5.84E-05 |
| phe.Fasting_rs149075406S8 | DIAPH1 | rs75374128  | S5  | CNTLN      | 1.47E-16 | 6.01E-09   | 5.72E-13    | 1.01E-07 | 1           | 1.42E-04 |
| phe.Fasting_rs149075406S8 | DIAPH1 | rs75506779  | S5  | TMCO3      | 5.55E-07 | 1          | 0.000360863 | 1.10E-08 | 0.449707    | 2.03E-05 |
| phe.Fasting_rs149075406S8 | DIAPH1 | rs75758702  | S24 | NA         | 7.02E-17 | 2.87E-09   | 3.16E-13    | 1.57E-10 | 0.00638323  | 4.59E-07 |
| phe.Fasting_rs149075406S8 | DIAPH1 | rs75864203  | S8  | CNTLN      | 1.47E-16 | 6.01E-09   | 5.72E-13    | 1.01E-07 | 1           | 1.42E-04 |
| phe.Fasting_rs149075406S8 | DIAPH1 | rs75949566  | S5  | TMEM64     | 2.76E-06 | 1          | 0.001473    | 8.48E-11 | 0.00345267  | 2.62E-07 |
| phe.Fasting_rs149075406S8 | DIAPH1 | rs76844308  | S8  | CNTLN      | 7.68E-17 | 3.14E-09   | 3.41E-13    | 9.52E-08 | 1           | 1.35E-04 |
| phe.Fasting_rs149075406S8 | DIAPH1 | rs7763107   | S8  | FARS2      | 5.78E-16 | 2.36E-08   | 1.79E-12    | 9.23E-12 | 0.000375564 | 3.44E-08 |
| phe.Fasting_rs149075406S8 | DIAPH1 | rs77798597  | S7  | KPNA3      | 2.97E-15 | 1.21E-07   | 8.14E-12    | 1.09E-13 | 4.44E-06    | 6.79E-10 |
| phe.Fasting_rs149075406S8 | DIAPH1 | rs77845645  | S21 | NA         | 1.53E-06 | 1          | 8.88E-04    | 4.20E-11 | 0.00170882  | 1.38E-07 |
| phe.Fasting_rs149075406S8 | DIAPH1 | rs78353402  | S8  | AP3M2      | 4.51E-15 | 1.84E-07   | 1.18E-11    | 3.87E-07 | 1           | 4.75E-04 |
| phe.Fasting_rs149075406S8 | DIAPH1 | rs78516788  | S8  | SLC38A1    | 2.75E-11 | 0.00112269 | 3.94E-08    | 2.44E-10 | 0.00992686  | 6.74E-07 |
| phe.Fasting_rs149075406S8 | DIAPH1 | rs78697063  | S5  | MSI2       | 8.23E-19 | 3.36E-11   | 2.70E-14    | 6.84E-10 | 0.0278369   | 1.70E-06 |
| phe.Fasting_rs149075406S8 | DIAPH1 | rs78722272  | S5  | CNTLN      | 1.47E-16 | 6.01E-09   | 5.72E-13    | 1.05E-07 | 1           | 1.48E-04 |
| phe.Fasting_rs149075406S8 | DIAPH1 | rs78736524  | S5  | KPNA3      | 2.97E-15 | 1.21E-07   | 8.14E-12    | 1.18E-13 | 4.80E-06    | 7.06E-10 |
| phe.Fasting_rs149075406S8 | DIAPH1 | rs78990344  | S2  | LOC1005063 | 2.37E-06 | 1          | 0.00129547  | 6.78E-11 | 0.00276161  | 2.13E-07 |
| phe.Fasting_rs149075406S8 | DIAPH1 | rs79781495  | S8  | KPNA3      | 2.97E-15 | 1.21E-07   | 8.14E-12    | 1.09E-13 | 4.44E-06    | 6.79E-10 |
| phe.Fasting_rs149075406S8 | DIAPH1 | rs79886603  | S15 | NA         | 8.71E-08 | 1          | 6.74E-05    | 4.66E-07 | 1           | 5.59E-04 |
| phe.Fasting_rs149075406S8 | DIAPH1 | rs80200953  | S8  | PPP2R5D    | 8.49E-17 | 3.47E-09   | 3.69E-13    | 3.65E-09 | 0.148399    | 7.55E-06 |
| phe.Fasting_rs149075406S8 | DIAPH1 | rs80332465  | S5  | KPNA3      | 3.13E-15 | 1.28E-07   | 8.51E-12    | 1.17E-13 | 4.77E-06    | 7.06E-10 |
| phe.Fasting_rs149075406S8 | DIAPH1 | rs80334773  | S5  | KPNA3      | 3.13E-15 | 1.28E-07   | 8.51E-12    | 1.17E-13 | 4.77E-06    | 7.06E-10 |
| phe.Fasting_rs149334783S8 | DIAPH1 | rs111576333 | S5  | TMEM64     | 2.37E-06 | 1.00E+00   | 1.30E-03    | 5.87E-14 | 2.39E-06    | 3.99E-10 |
| phe.Fasting_rs149334783S8 | DIAPH1 | rs112089881 | S8  | ZFAND4     | 2.04E-17 | 8.32E-10   | 1.43E-13    | 1.09E-09 | 0.0445256   | 2.58E-06 |
| phe.Fasting_rs149334783S8 | DIAPH1 | rs112091318 | S5  | TMEM64     | 7.32E-07 | 1          | 0.000459899 | 3.91E-08 | 1           | 6.13E-05 |
| phe.Fasting_rs149334783S8 | DIAPH1 | rs114334325 | S7  | AP3M2      | 4.51E-15 | 1.84E-07   | 1.18E-11    | 3.87E-07 | 1           | 4.75E-04 |
| phe.Fasting_rs149334783S8 | DIAPH1 | rs114394395 | S7  | AP3M2      | 4.81E-15 | 1.97E-07   | 1.25E-11    | 3.87E-07 | 1           | 4.75E-04 |
| phe.Fasting_rs149334783S8 | DIAPH1 | rs114565620 | S8  | RCL1       | 1.82E-16 | 7.42E-09   | 6.37E-13    | 3.70E-08 | 1           | 5.84E-05 |
| phe.Fasting_rs149334783S8 | DIAPH1 | rs115083290 | S19 | NA         | 4.38E-16 | 1.79E-08   | 1.40E-12    | 1.42E-08 | 0.576679    | 2.53E-05 |
| phe.Fasting_rs149334783S8 | DIAPH1 | rs11524145  | S5  | CDK6       | 7.80E-07 | 1          | 0.000486356 | 7.89E-06 | 1           | 6.69E-03 |
| phe.Fasting_rs149334783S8 | DIAPH1 | rs115752779 | S19 | NA         | 4.38E-16 | 1.79E-08   | 1.40E-12    | 1.42E-08 | 0.576679    | 2.53E-05 |
| phe.Fasting_rs149334783S8 | DIAPH1 | rs115787552 | S5  | KPNA3      | 2.97E-15 | 1.21E-07   | 8.14E-12    | 1.18E-13 | 4.80E-06    | 7.06E-10 |
| phe.Fasting_rs149334783S8 | DIAPH1 | rs115888477 | S8  | NA         | 2.03E-14 | 8.28E-07   | 5.02E-11    | 2.21E-14 | 8.99E-07    | 1.73E-10 |
| phe.Fasting_rs149334783S8 | DIAPH1 | rs116011837 | S9  | BRD2       | 4.89E-11 | 0.00199774 | 6.62E-08    | 4.07E-14 | 1.66E-06    | 2.85E-10 |
| phe.Fasting_rs149334783S8 | DIAPH1 | rs116079984 | S8  | KPNA3      | 2.97E-15 | 1.21E-07   | 8.14E-12    | 1.24E-13 | 5.04E-06    | 7.34E-10 |
| phe.Fasting_rs149334783S8 | DIAPH1 | rs116120727 | S9  | BRD2       | 4.89E-11 | 0.00199774 | 6.62E-08    | 4.07E-14 | 1.66E-06    | 2.85E-10 |
| phe.Fasting_rs149334783S8 | DIAPH1 | rs116406581 | S2  | NA         | 1.81E-14 | 7.39E-07   | 4.52E-11    | 2.35E-07 | 1           | 3.05E-04 |
| phe.Fasting_rs149334783S8 | DIAPH1 | rs116548615 | S8  | TMEM45B    | 1.73E-16 | 7.06E-09   | 6.15E-13    | 8.70E-12 | 0.000354153 | 3.26E-08 |
| phe.Fasting_rs149334783S8 | DIAPH1 | rs116696844 | S3  | AP3M2      | 6.92E-15 | 2.83E-07   | 1.78E-11    | 3.87E-07 | 1           | 4.75E-04 |

|              |             |    |        |             |     |           |          |             |             |          |             |          |
|--------------|-------------|----|--------|-------------|-----|-----------|----------|-------------|-------------|----------|-------------|----------|
| phe.Fasting_ | rs149334783 | S8 | DIAPH1 | rs11989304  | S4  | TMEM64    | 2.37E-06 | 1           | 0.00129547  | 6.78E-11 | 0.00276161  | 2.13E-07 |
| phe.Fasting_ | rs149334783 | S8 | DIAPH1 | rs140524622 | S7  | MRPL10    | 1.08E-16 | 4.41E-09    | 4.54E-13    | 7.35E-06 | 1           | 6.31E-03 |
| phe.Fasting_ | rs149334783 | S8 | DIAPH1 | rs146815317 | S5  | KPNA3     | 2.97E-15 | 1.21E-07    | 8.14E-12    | 1.18E-13 | 4.80E-06    | 7.06E-10 |
| phe.Fasting_ | rs149334783 | S8 | DIAPH1 | rs150117838 | S8  | KPNA3     | 2.97E-15 | 1.21E-07    | 8.14E-12    | 1.09E-13 | 4.44E-06    | 6.79E-10 |
| phe.Fasting_ | rs149334783 | S8 | DIAPH1 | rs150916187 | S4  | HIST1H2BK | 1.38E-05 | 1           | 0.00605332  | 1.37E-14 | 5.59E-07    | 1.16E-10 |
| phe.Fasting_ | rs149334783 | S8 | DIAPH1 | rs16894241  | S4  | HIST1H2BK | 1.99E-11 | 0.000812315 | 2.96E-08    | 3.44E-14 | 1.40E-06    | 2.50E-10 |
| phe.Fasting_ | rs149334783 | S8 | DIAPH1 | rs2032062   | S8  | NA        | 1.22E-14 | 4.98E-07    | 3.09E-11    | 8.48E-06 | 1           | 7.14E-03 |
| phe.Fasting_ | rs149334783 | S8 | DIAPH1 | rs2153597   | S8  | ZNF438    | 5.51E-11 | 0.00224928  | 7.42E-08    | 4.52E-09 | 0.183916    | 9.08E-06 |
| phe.Fasting_ | rs149334783 | S8 | DIAPH1 | rs2835656   | S7  | TTC3      | 3.01E-10 | 0.0122766   | 3.60E-07    | 9.12E-06 | 1           | 7.57E-03 |
| phe.Fasting_ | rs149334783 | S8 | DIAPH1 | rs34801978  | S3  | HOXB2     | 1.23E-05 | 1           | 0.00545724  | 1.03E-08 | 0.419057    | 1.90E-05 |
| phe.Fasting_ | rs149334783 | S8 | DIAPH1 | rs352346    | S3  | GRPEL2    | 1.85E-11 | 0.000754995 | 2.78E-08    | 8.42E-06 | 1           | 7.10E-03 |
| phe.Fasting_ | rs149334783 | S8 | DIAPH1 | rs3750898   | S8  | DCLRE1A   | 2.29E-05 | 1           | 0.0093502   | 8.76E-06 | 1           | 7.32E-03 |
| phe.Fasting_ | rs149334783 | S8 | DIAPH1 | rs4732511   | S13 | POR       | 2.30E-15 | 9.39E-08    | 6.48E-12    | 9.65E-06 | 1           | 7.93E-03 |
| phe.Fasting_ | rs149334783 | S8 | DIAPH1 | rs57503635  | S3  | NA        | 6.34E-16 | 2.59E-08    | 1.95E-12    | 3.17E-14 | 1.29E-06    | 2.34E-10 |
| phe.Fasting_ | rs149334783 | S8 | DIAPH1 | rs58905476  | S7  | TTC3      | 3.29E-10 | 0.0134302   | 3.90E-07    | 9.79E-06 | 1           | 8.01E-03 |
| phe.Fasting_ | rs149334783 | S8 | DIAPH1 | rs60011869  | S16 | NA        | 1.04E-05 | 1           | 0.00472365  | 8.16E-10 | 0.0332257   | 1.98E-06 |
| phe.Fasting_ | rs149334783 | S8 | DIAPH1 | rs6964407   | S7  | POR       | 7.55E-15 | 3.08E-07    | 1.94E-11    | 8.91E-06 | 1           | 7.43E-03 |
| phe.Fasting_ | rs149334783 | S8 | DIAPH1 | rs7004597   | S8  | NA        | 4.51E-15 | 1.84E-07    | 1.18E-11    | 2.34E-07 | 1           | 3.04E-04 |
| phe.Fasting_ | rs149334783 | S8 | DIAPH1 | rs7256517   | S7  | CYTH2     | 1.04E-15 | 4.24E-08    | 3.06E-12    | 4.82E-12 | 0.000196022 | 1.91E-08 |
| phe.Fasting_ | rs149334783 | S8 | DIAPH1 | rs73283603  | S7  | ZWINT     | 1.90E-06 | 1           | 0.0010688   | 2.03E-07 | 1           | 2.68E-04 |
| phe.Fasting_ | rs149334783 | S8 | DIAPH1 | rs73392640  | S8  | POLR3B    | 2.02E-10 | 0.00826001  | 2.49E-07    | 5.19E-11 | 0.00211214  | 1.67E-07 |
| phe.Fasting_ | rs149334783 | S8 | DIAPH1 | rs734069    | S19 | NA        | 2.06E-08 | 0.839421    | 1.81E-05    | 6.71E-10 | 0.0272994   | 1.68E-06 |
| phe.Fasting_ | rs149334783 | S8 | DIAPH1 | rs73619637  | S8  | NA        | 1.44E-15 | 5.89E-08    | 4.14E-12    | 2.05E-10 | 0.00833668  | 5.78E-07 |
| phe.Fasting_ | rs149334783 | S8 | DIAPH1 | rs74627895  | S8  | TMEM64    | 7.32E-07 | 1           | 0.000459899 | 2.03E-08 | 0.828094    | 3.48E-05 |
| phe.Fasting_ | rs149334783 | S8 | DIAPH1 | rs74914207  | S24 | NA        | 1.37E-10 | 0.00558626  | 1.73E-07    | 9.12E-11 | 0.0037135   | 2.80E-07 |
| phe.Fasting_ | rs149334783 | S8 | DIAPH1 | rs75350765  | S5  | RCL1      | 1.82E-16 | 7.42E-09    | 6.37E-13    | 3.70E-08 | 1           | 5.84E-05 |
| phe.Fasting_ | rs149334783 | S8 | DIAPH1 | rs75374128  | S5  | CNTLN     | 1.47E-16 | 6.01E-09    | 5.72E-13    | 1.01E-07 | 1           | 1.42E-04 |
| phe.Fasting_ | rs149334783 | S8 | DIAPH1 | rs75506779  | S5  | TMCO3     | 5.55E-07 | 1           | 0.000360863 | 1.10E-08 | 0.449707    | 2.03E-05 |
| phe.Fasting_ | rs149334783 | S8 | DIAPH1 | rs75758702  | S24 | NA        | 7.02E-17 | 2.87E-09    | 3.16E-13    | 1.57E-10 | 0.00638323  | 4.59E-07 |
| phe.Fasting_ | rs149334783 | S8 | DIAPH1 | rs75864203  | S8  | CNTLN     | 1.47E-16 | 6.01E-09    | 5.72E-13    | 1.01E-07 | 1           | 1.42E-04 |
| phe.Fasting_ | rs149334783 | S8 | DIAPH1 | rs75949566  | S5  | TMEM64    | 2.76E-06 | 1           | 0.001473    | 8.48E-11 | 0.00345267  | 2.62E-07 |
| phe.Fasting_ | rs149334783 | S8 | DIAPH1 | rs76844308  | S8  | CNTLN     | 7.68E-17 | 3.14E-09    | 3.41E-13    | 9.52E-08 | 1           | 1.35E-04 |
| phe.Fasting_ | rs149334783 | S8 | DIAPH1 | rs7763107   | S8  | FARS2     | 5.78E-16 | 2.36E-08    | 1.79E-12    | 9.23E-12 | 0.000375564 | 3.44E-08 |
| phe.Fasting_ | rs149334783 | S8 | DIAPH1 | rs77798597  | S7  | KPNA3     | 2.97E-15 | 1.21E-07    | 8.14E-12    | 1.09E-13 | 4.44E-06    | 6.79E-10 |
| phe.Fasting_ | rs149334783 | S8 | DIAPH1 | rs77845645  | S21 | NA        | 1.53E-06 | 1           | 0.000888475 | 4.20E-11 | 0.00170882  | 1.38E-07 |
| phe.Fasting_ | rs149334783 | S8 | DIAPH1 | rs78353402  | S8  | AP3M2     | 4.51E-15 | 1.84E-07    | 1.18E-11    | 3.87E-07 | 1           | 4.75E-04 |
| phe.Fasting_ | rs149334783 | S8 | DIAPH1 | rs78516788  | S8  | SLC38A1   | 2.75E-11 | 1.12E-03    | 3.94E-08    | 2.44E-10 | 0.00992686  | 6.74E-07 |
| phe.Fasting_ | rs149334783 | S8 | DIAPH1 | rs78697063  | S5  | MSI2      | 8.23E-19 | 3.36E-11    | 2.70E-14    | 6.84E-10 | 0.0278369   | 1.70E-06 |
| phe.Fasting_ | rs149334783 | S8 | DIAPH1 | rs78722272  | S5  | CNTLN     | 1.47E-16 | 6.01E-09    | 5.72E-13    | 1.05E-07 | 1           | 1.48E-04 |
| phe.Fasting_ | rs149334783 | S8 | DIAPH1 | rs78736524  | S5  | KPNA3     | 2.97E-15 | 1.21E-07    | 8.14E-12    | 1.18E-13 | 4.80E-06    | 7.06E-10 |

|              |             |     |            |             |     |            |          |             |            |          |             |          |
|--------------|-------------|-----|------------|-------------|-----|------------|----------|-------------|------------|----------|-------------|----------|
| phe.Fasting_ | rs149334783 | S8  | DIAPH1     | rs78990344  | S2  | LOC1005063 | 2.37E-06 | 1.00E+00    | 1.30E-03   | 6.78E-11 | 0.00276161  | 2.13E-07 |
| phe.Fasting_ | rs149334783 | S8  | DIAPH1     | rs79781495  | S8  | KPNA3      | 2.97E-15 | 1.21E-07    | 8.14E-12   | 1.09E-13 | 4.44E-06    | 6.79E-10 |
| phe.Fasting_ | rs149334783 | S8  | DIAPH1     | rs79886603  | S15 | NA         | 8.71E-08 | 1.00E+00    | 6.74E-05   | 4.66E-07 | 1           | 5.59E-04 |
| phe.Fasting_ | rs149334783 | S8  | DIAPH1     | rs80200953  | S8  | PPP2R5D    | 8.49E-17 | 3.47E-09    | 3.69E-13   | 3.65E-09 | 0.148399    | 7.55E-06 |
| phe.Fasting_ | rs149334783 | S8  | DIAPH1     | rs80332465  | S5  | KPNA3      | 3.13E-15 | 1.28E-07    | 8.51E-12   | 1.17E-13 | 4.77E-06    | 7.06E-10 |
| phe.Fasting_ | rs149334783 | S8  | DIAPH1     | rs80334773  | S5  | KPNA3      | 3.13E-15 | 1.28E-07    | 8.51E-12   | 1.17E-13 | 4.77E-06    | 7.06E-10 |
| phe.Fasting_ | rs149553852 | S21 | "PCDHGA10, | rs112089881 | S8  | ZFAND4     | 1.96E-18 | 7.99E-11    | 4.03E-14   | 3.02E-10 | 0.0122912   | 8.15E-07 |
| phe.Fasting_ | rs149553852 | S21 | "PCDHGA10, | rs112091318 | S5  | TMEM64     | 1.52E-05 | 1.00E+00    | 6.58E-03   | 2.56E-07 | 1           | 3.30E-04 |
| phe.Fasting_ | rs149553852 | S21 | "PCDHGA10, | rs114334325 | S7  | AP3M2      | 8.70E-16 | 3.55E-08    | 2.60E-12   | 5.52E-06 | 1           | 4.97E-03 |
| phe.Fasting_ | rs149553852 | S21 | "PCDHGA10, | rs114394395 | S7  | AP3M2      | 9.30E-16 | 3.80E-08    | 2.77E-12   | 5.52E-06 | 1           | 4.97E-03 |
| phe.Fasting_ | rs149553852 | S21 | "PCDHGA10, | rs114565620 | S8  | RCL1       | 1.29E-17 | 5.26E-10    | 1.08E-13   | 1.39E-08 | 0.566303    | 2.49E-05 |
| phe.Fasting_ | rs149553852 | S21 | "PCDHGA10, | rs115305957 | S23 | NA         | 1.81E-05 | 1.00E+00    | 7.66E-03   | 1.43E-12 | 5.82E-05    | 6.44E-09 |
| phe.Fasting_ | rs149553852 | S21 | "PCDHGA10, | rs115787552 | S5  | KPNA3      | 3.78E-16 | 1.54E-08    | 1.23E-12   | 4.20E-14 | 1.71E-06    | 2.93E-10 |
| phe.Fasting_ | rs149553852 | S21 | "PCDHGA10, | rs115888477 | S8  | NA         | 2.72E-15 | 1.11E-07    | 7.62E-12   | 7.36E-15 | 3.00E-07    | 6.53E-11 |
| phe.Fasting_ | rs149553852 | S21 | "PCDHGA10, | rs116011837 | S9  | BRD2       | 1.05E-06 | 1           | 0.00063174 | 6.95E-14 | 2.83E-06    | 4.69E-10 |
| phe.Fasting_ | rs149553852 | S21 | "PCDHGA10, | rs116079984 | S8  | KPNA3      | 3.78E-16 | 1.54E-08    | 1.23E-12   | 4.48E-14 | 1.82E-06    | 3.11E-10 |
| phe.Fasting_ | rs149553852 | S21 | "PCDHGA10, | rs116120727 | S9  | BRD2       | 1.05E-06 | 1.00E+00    | 6.32E-04   | 6.95E-14 | 2.83E-06    | 4.69E-10 |
| phe.Fasting_ | rs149553852 | S21 | "PCDHGA10, | rs116406581 | S2  | NA         | 3.68E-15 | 1.50E-07    | 9.90E-12   | 3.30E-06 | 1           | 3.18E-03 |
| phe.Fasting_ | rs149553852 | S21 | "PCDHGA10, | rs116548615 | S8  | TMEM45B    | 2.04E-17 | 8.34E-10    | 1.43E-13   | 7.86E-12 | 0.000320069 | 2.98E-08 |
| phe.Fasting_ | rs149553852 | S21 | "PCDHGA10, | rs116696844 | S3  | AP3M2      | 1.40E-15 | 5.70E-08    | 4.02E-12   | 5.52E-06 | 1           | 4.97E-03 |
| phe.Fasting_ | rs149553852 | S21 | "PCDHGA10, | rs146815317 | S5  | KPNA3      | 3.78E-16 | 1.54E-08    | 1.23E-12   | 4.20E-14 | 1.71E-06    | 2.93E-10 |
| phe.Fasting_ | rs149553852 | S21 | "PCDHGA10, | rs150117838 | S8  | KPNA3      | 3.78E-16 | 1.54E-08    | 1.23E-12   | 3.89E-14 | 1.58E-06    | 2.77E-10 |
| phe.Fasting_ | rs149553852 | S21 | "PCDHGA10, | rs16894241  | S4  | HIST1H2BK  | 1.90E-07 | 1.00E+00    | 1.36E-04   | 1.18E-14 | 4.80E-07    | 1.01E-10 |
| phe.Fasting_ | rs149553852 | S21 | "PCDHGA10, | rs2153597   | S8  | ZNF438     | 5.42E-12 | 0.000221525 | 9.59E-09   | 5.42E-06 | 1           | 4.90E-03 |
| phe.Fasting_ | rs149553852 | S21 | "PCDHGA10, | rs352346    | S3  | GRPEL2     | 2.27E-07 | 1           | 1.60E-04   | 1.07E-05 | 1           | 8.65E-03 |
| phe.Fasting_ | rs149553852 | S21 | "PCDHGA10, | rs57503635  | S3  | NA         | 7.95E-08 | 1           | 6.20E-05   | 1.16E-14 | 4.73E-07    | 1.00E-10 |
| phe.Fasting_ | rs149553852 | S21 | "PCDHGA10, | rs60011869  | S16 | NA         | 1.45E-06 | 1           | 8.45E-04   | 3.19E-10 | 0.0129858   | 8.56E-07 |
| phe.Fasting_ | rs149553852 | S21 | "PCDHGA10, | rs7004597   | S8  | NA         | 8.70E-16 | 3.55E-08    | 2.60E-12   | 3.26E-06 | 1           | 3.15E-03 |
| phe.Fasting_ | rs149553852 | S21 | "PCDHGA10, | rs7256517   | S7  | CYTH2      | 1.38E-16 | 5.63E-09    | 5.47E-13   | 2.91E-10 | 0.0118364   | 7.91E-07 |
| phe.Fasting_ | rs149553852 | S21 | "PCDHGA10, | rs73392640  | S8  | POLR3B     | 3.00E-11 | 0.00122354  | 4.24E-08   | 4.09E-10 | 0.0166326   | 1.07E-06 |
| phe.Fasting_ | rs149553852 | S21 | "PCDHGA10, | rs74627895  | S8  | TMEM64     | 1.52E-05 | 1           | 6.58E-03   | 1.28E-07 | 1           | 1.77E-04 |
| phe.Fasting_ | rs149553852 | S21 | "PCDHGA10, | rs74701059  | S24 | C17orf102  | 1.84E-05 | 1           | 7.76E-03   | 2.11E-12 | 8.58E-05    | 9.15E-09 |
| phe.Fasting_ | rs149553852 | S21 | "PCDHGA10, | rs74914207  | S24 | NA         | 1.23E-11 | 0.000502589 | 1.92E-08   | 1.49E-07 | 1           | 2.03E-04 |
| phe.Fasting_ | rs149553852 | S21 | "PCDHGA10, | rs75350765  | S5  | RCL1       | 1.29E-17 | 5.26E-10    | 1.08E-13   | 1.39E-08 | 0.566303    | 2.49E-05 |
| phe.Fasting_ | rs149553852 | S21 | "PCDHGA10, | rs75374128  | S5  | CNTLN      | 1.32E-17 | 5.41E-10    | 1.09E-13   | 2.01E-06 | 1           | 2.08E-03 |
| phe.Fasting_ | rs149553852 | S21 | "PCDHGA10, | rs75758702  | S24 | NA         | 7.70E-18 | 3.14E-10    | 8.50E-14   | 6.42E-10 | 0.0261274   | 1.61E-06 |
| phe.Fasting_ | rs149553852 | S21 | "PCDHGA10, | rs75864203  | S8  | CNTLN      | 1.32E-17 | 5.41E-10    | 1.09E-13   | 2.01E-06 | 1           | 2.08E-03 |
| phe.Fasting_ | rs149553852 | S21 | "PCDHGA10, | rs76844308  | S8  | CNTLN      | 7.07E-18 | 2.89E-10    | 8.18E-14   | 1.78E-06 | 1           | 1.87E-03 |
| phe.Fasting_ | rs149553852 | S21 | "PCDHGA10, | rs7763107   | S8  | FARS2      | 2.63E-08 | 1           | 2.28E-05   | 3.07E-10 | 0.012484    | 8.27E-07 |
| phe.Fasting_ | rs149553852 | S21 | "PCDHGA10, | rs77798597  | S7  | KPNA3      | 3.78E-16 | 1.54E-08    | 1.23E-12   | 3.89E-14 | 1.58E-06    | 2.77E-10 |

|              |             |     |            |             |     |           |          |             |            |          |             |          |
|--------------|-------------|-----|------------|-------------|-----|-----------|----------|-------------|------------|----------|-------------|----------|
| phe.Fasting_ | rs149553852 | S21 | "PCDHGA10, | rs77845645  | S21 | NA        | 2.15E-07 | 1           | 1.52E-04   | 2.70E-11 | 0.00109923  | 9.29E-08 |
| phe.Fasting_ | rs149553852 | S21 | "PCDHGA10, | rs78353402  | S8  | AP3M2     | 8.70E-16 | 3.55E-08    | 2.60E-12   | 5.52E-06 | 1           | 4.97E-03 |
| phe.Fasting_ | rs149553852 | S21 | "PCDHGA10, | rs78516788  | S8  | SLC38A1   | 3.43E-12 | 0.000140209 | 6.23E-09   | 7.67E-09 | 0.312323    | 1.47E-05 |
| phe.Fasting_ | rs149553852 | S21 | "PCDHGA10, | rs78697063  | S5  | MSI2      | 4.23E-20 | 1.73E-12    | 2.23E-14   | 2.49E-10 | 0.0101226   | 6.85E-07 |
| phe.Fasting_ | rs149553852 | S21 | "PCDHGA10, | rs78722272  | S5  | CNTLN     | 1.32E-17 | 5.41E-10    | 1.09E-13   | 2.07E-06 | 1           | 2.14E-03 |
| phe.Fasting_ | rs149553852 | S21 | "PCDHGA10, | rs78736524  | S5  | KPNA3     | 3.78E-16 | 1.54E-08    | 1.23E-12   | 4.20E-14 | 1.71E-06    | 2.93E-10 |
| phe.Fasting_ | rs149553852 | S21 | "PCDHGA10, | rs79703349  | S24 | C17orf102 | 1.84E-05 | 1           | 7.76E-03   | 2.63E-12 | 0.000107117 | 1.13E-08 |
| phe.Fasting_ | rs149553852 | S21 | "PCDHGA10, | rs79781495  | S8  | KPNA3     | 3.78E-16 | 1.54E-08    | 1.23E-12   | 3.89E-14 | 1.58E-06    | 2.77E-10 |
| phe.Fasting_ | rs149553852 | S21 | "PCDHGA10, | rs79886603  | S15 | NA        | 1.10E-08 | 0.447989    | 1.01E-05   | 9.00E-06 | 1           | 7.49E-03 |
| phe.Fasting_ | rs149553852 | S21 | "PCDHGA10, | rs80200953  | S8  | PPP2R5D   | 1.32E-08 | 0.538553    | 1.20E-05   | 3.10E-06 | 1           | 3.01E-03 |
| phe.Fasting_ | rs149553852 | S21 | "PCDHGA10, | rs80332465  | S5  | KPNA3     | 4.04E-16 | 1.65E-08    | 1.31E-12   | 4.20E-14 | 1.71E-06    | 2.93E-10 |
| phe.Fasting_ | rs149553852 | S21 | "PCDHGA10, | rs80334773  | S5  | KPNA3     | 4.04E-16 | 1.65E-08    | 1.31E-12   | 4.20E-14 | 1.71E-06    | 2.93E-10 |
| phe.Fasting_ | rs149716949 | S5  | DIAPH1     | rs111576333 | S5  | TMEM64    | 3.47E-07 | 1           | 2.37E-04   | 4.16E-15 | 1.69E-07    | 3.88E-11 |
| phe.Fasting_ | rs149716949 | S5  | DIAPH1     | rs112089881 | S8  | ZFAND4    | 1.96E-18 | 7.99E-11    | 4.03E-14   | 6.56E-10 | 0.026686    | 1.65E-06 |
| phe.Fasting_ | rs149716949 | S5  | DIAPH1     | rs112091318 | S5  | TMEM64    | 1.04E-07 | 1           | 7.88E-05   | 5.11E-09 | 0.208096    | 1.01E-05 |
| phe.Fasting_ | rs149716949 | S5  | DIAPH1     | rs114334325 | S7  | AP3M2     | 4.66E-16 | 1.90E-08    | 1.49E-12   | 4.08E-08 | 1           | 6.39E-05 |
| phe.Fasting_ | rs149716949 | S5  | DIAPH1     | rs114394395 | S7  | AP3M2     | 5.01E-16 | 2.05E-08    | 1.59E-12   | 4.08E-08 | 1           | 6.39E-05 |
| phe.Fasting_ | rs149716949 | S5  | DIAPH1     | rs114565620 | S8  | RCL1      | 1.35E-17 | 5.51E-10    | 1.11E-13   | 5.21E-09 | 0.212083    | 1.03E-05 |
| phe.Fasting_ | rs149716949 | S5  | DIAPH1     | rs115083290 | S19 | NA        | 5.02E-17 | 2.05E-09    | 2.47E-13   | 5.78E-08 | 1           | 8.75E-05 |
| phe.Fasting_ | rs149716949 | S5  | DIAPH1     | rs11524145  | S5  | CDK6      | 8.44E-08 | 1           | 6.55E-05   | 1.09E-06 | 1           | 1.22E-03 |
| phe.Fasting_ | rs149716949 | S5  | DIAPH1     | rs115305957 | S23 | NA        | 1.77E-05 | 1           | 7.48E-03   | 2.97E-08 | 1           | 4.83E-05 |
| phe.Fasting_ | rs149716949 | S5  | DIAPH1     | rs115752779 | S19 | NA        | 5.02E-17 | 2.05E-09    | 2.47E-13   | 5.78E-08 | 1           | 8.75E-05 |
| phe.Fasting_ | rs149716949 | S5  | DIAPH1     | rs115787552 | S5  | KPNA3     | 3.43E-16 | 1.40E-08    | 1.13E-12   | 1.11E-14 | 4.52E-07    | 9.57E-11 |
| phe.Fasting_ | rs149716949 | S5  | DIAPH1     | rs115888477 | S8  | NA        | 2.52E-15 | 1.03E-07    | 7.08E-12   | 1.96E-15 | 7.97E-08    | 2.11E-11 |
| phe.Fasting_ | rs149716949 | S5  | DIAPH1     | rs116011837 | S9  | BRD2      | 4.69E-12 | 0.00019166  | 8.39E-09   | 2.53E-15 | 1.03E-07    | 2.47E-11 |
| phe.Fasting_ | rs149716949 | S5  | DIAPH1     | rs116079984 | S8  | KPNA3     | 3.43E-16 | 1.40E-08    | 1.13E-12   | 1.23E-14 | 5.02E-07    | 1.06E-10 |
| phe.Fasting_ | rs149716949 | S5  | DIAPH1     | rs116120727 | S9  | BRD2      | 4.69E-12 | 0.00019166  | 8.39E-09   | 2.53E-15 | 1.03E-07    | 2.47E-11 |
| phe.Fasting_ | rs149716949 | S5  | DIAPH1     | rs116406581 | S2  | NA        | 2.02E-15 | 8.24E-08    | 5.72E-12   | 2.29E-08 | 0.930326    | 3.82E-05 |
| phe.Fasting_ | rs149716949 | S5  | DIAPH1     | rs116696844 | S3  | AP3M2     | 7.30E-16 | 2.98E-08    | 2.23E-12   | 4.08E-08 | 1           | 6.39E-05 |
| phe.Fasting_ | rs149716949 | S5  | DIAPH1     | rs11989304  | S4  | TMEM64    | 3.47E-07 | 1           | 2.37E-04   | 6.37E-12 | 0.000259445 | 2.46E-08 |
| phe.Fasting_ | rs149716949 | S5  | DIAPH1     | rs140524622 | S7  | MRPL10    | 1.22E-17 | 4.98E-10    | 1.05E-13   | 1.66E-06 | 1           | 1.76E-03 |
| phe.Fasting_ | rs149716949 | S5  | DIAPH1     | rs146815317 | S5  | KPNA3     | 3.43E-16 | 1.40E-08    | 1.13E-12   | 1.11E-14 | 4.52E-07    | 9.57E-11 |
| phe.Fasting_ | rs149716949 | S5  | DIAPH1     | rs150117838 | S8  | KPNA3     | 3.43E-16 | 1.40E-08    | 1.13E-12   | 1.08E-14 | 4.39E-07    | 9.34E-11 |
| phe.Fasting_ | rs149716949 | S5  | DIAPH1     | rs150916187 | S4  | HIST1H2BK | 2.33E-06 | 1           | 0.00127864 | 1.06E-15 | 4.30E-08    | 1.21E-11 |
| phe.Fasting_ | rs149716949 | S5  | DIAPH1     | rs16894241  | S4  | HIST1H2BK | 1.60E-12 | 6.55E-05    | 3.12E-09   | 2.98E-15 | 1.21E-07    | 2.87E-11 |
| phe.Fasting_ | rs149716949 | S5  | DIAPH1     | rs2153597   | S8  | ZNF438    | 4.53E-12 | 0.000185128 | 8.11E-09   | 4.15E-10 | 0.0168962   | 1.09E-06 |
| phe.Fasting_ | rs149716949 | S5  | DIAPH1     | rs34801978  | S3  | HOXB2     | 2.46E-06 | 1.00E+00    | 1.34E-03   | 8.27E-10 | 0.033679    | 2.01E-06 |
| phe.Fasting_ | rs149716949 | S5  | DIAPH1     | rs352346    | S3  | GRPEL2    | 8.19E-13 | 3.34E-05    | 1.70E-09   | 1.20E-06 | 1           | 1.33E-03 |
| phe.Fasting_ | rs149716949 | S5  | DIAPH1     | rs57503635  | S3  | NA        | 7.80E-17 | 3.19E-09    | 3.46E-13   | 3.01E-15 | 1.22E-07    | 2.90E-11 |
| phe.Fasting_ | rs149716949 | S5  | DIAPH1     | rs7004597   | S8  | NA        | 4.66E-16 | 1.90E-08    | 1.49E-12   | 2.31E-08 | 0.939181    | 3.85E-05 |

|                           |        |             |     |             |          |             |             |          |             |          |
|---------------------------|--------|-------------|-----|-------------|----------|-------------|-------------|----------|-------------|----------|
| phe.Fasting_rs149716949S5 | DIAPH1 | rs7256517   | S7  | CYTH2       | 1.17E-16 | 4.79E-09    | 4.85E-13    | 4.07E-13 | 1.66E-05    | 2.19E-09 |
| phe.Fasting_rs149716949S5 | DIAPH1 | rs73283603  | S7  | ZWINT       | 2.07E-07 | 1.00E+00    | 1.47E-04    | 1.01E-06 | 1           | 1.14E-03 |
| phe.Fasting_rs149716949S5 | DIAPH1 | rs73392640  | S8  | POLR3B      | 1.99E-11 | 8.14E-04    | 2.96E-08    | 5.38E-12 | 0.000219004 | 2.11E-08 |
| phe.Fasting_rs149716949S5 | DIAPH1 | rs73619637  | S8  | NA          | 4.97E-06 | 1.00E+00    | 2.48E-03    | 4.26E-09 | 0.173551    | 8.70E-06 |
| phe.Fasting_rs149716949S5 | DIAPH1 | rs74627895  | S8  | TMEM64      | 1.04E-07 | 1           | 7.88E-05    | 2.52E-09 | 0.102776    | 5.44E-06 |
| phe.Fasting_rs149716949S5 | DIAPH1 | rs74701059  | S24 | C17orf102   | 1.77E-05 | 1.00E+00    | 7.50E-03    | 5.10E-08 | 1           | 7.82E-05 |
| phe.Fasting_rs149716949S5 | DIAPH1 | rs75350765  | S5  | RCL1        | 1.35E-17 | 5.51E-10    | 1.11E-13    | 5.21E-09 | 0.212083    | 1.03E-05 |
| phe.Fasting_rs149716949S5 | DIAPH1 | rs75374128  | S5  | CNTLN       | 1.54E-17 | 6.28E-10    | 1.19E-13    | 1.25E-08 | 0.509255    | 2.28E-05 |
| phe.Fasting_rs149716949S5 | DIAPH1 | rs75506779  | S5  | TMCO3       | 4.63E-08 | 1.00E+00    | 3.82E-05    | 1.33E-09 | 0.0539442   | 3.04E-06 |
| phe.Fasting_rs149716949S5 | DIAPH1 | rs75758702  | S24 | NA          | 7.30E-18 | 2.98E-10    | 8.31E-14    | 1.20E-11 | 0.00048753  | 4.39E-08 |
| phe.Fasting_rs149716949S5 | DIAPH1 | rs75864203  | S8  | CNTLN       | 1.54E-17 | 6.28E-10    | 1.19E-13    | 1.25E-08 | 0.509255    | 2.28E-05 |
| phe.Fasting_rs149716949S5 | DIAPH1 | rs75949566  | S5  | TMEM64      | 4.10E-07 | 1           | 0.000274756 | 7.92E-12 | 0.000322189 | 3.00E-08 |
| phe.Fasting_rs149716949S5 | DIAPH1 | rs76844308  | S8  | CNTLN       | 7.96E-18 | 3.25E-10    | 8.55E-14    | 1.19E-08 | 0.48292     | 2.17E-05 |
| phe.Fasting_rs149716949S5 | DIAPH1 | rs7763107   | S8  | FARS2       | 6.57E-17 | 2.68E-09    | 3.02E-13    | 1.15E-07 | 1           | 1.60E-04 |
| phe.Fasting_rs149716949S5 | DIAPH1 | rs77798597  | S7  | KPNA3       | 3.43E-16 | 1.40E-08    | 1.13E-12    | 1.08E-14 | 4.39E-07    | 9.34E-11 |
| phe.Fasting_rs149716949S5 | DIAPH1 | rs78353402  | S8  | AP3M2       | 4.66E-16 | 1.90E-08    | 1.49E-12    | 4.08E-08 | 1           | 6.39E-05 |
| phe.Fasting_rs149716949S5 | DIAPH1 | rs78516788  | S8  | SLC38A1     | 2.10E-12 | 8.56E-05    | 3.94E-09    | 3.41E-11 | 0.00138926  | 1.14E-07 |
| phe.Fasting_rs149716949S5 | DIAPH1 | rs78697063  | S5  | MSI2        | 4.40E-20 | 1.80E-12    | 2.23E-14    | 6.40E-11 | 0.00260631  | 2.03E-07 |
| phe.Fasting_rs149716949S5 | DIAPH1 | rs78703708  | S7  | FAF2        | 3.55E-12 | 0.000144813 | 6.41E-09    | 7.19E-06 | 1           | 6.20E-03 |
| phe.Fasting_rs149716949S5 | DIAPH1 | rs78722272  | S5  | CNTLN       | 1.54E-17 | 6.28E-10    | 1.19E-13    | 1.31E-08 | 0.532459    | 2.36E-05 |
| phe.Fasting_rs149716949S5 | DIAPH1 | rs78736524  | S5  | KPNA3       | 3.43E-16 | 1.40E-08    | 1.13E-12    | 1.11E-14 | 4.52E-07    | 9.57E-11 |
| phe.Fasting_rs149716949S5 | DIAPH1 | rs78990344  | S2  | LOC10050631 | 3.47E-07 | 1.00E+00    | 2.37E-04    | 6.37E-12 | 0.000259445 | 2.46E-08 |
| phe.Fasting_rs149716949S5 | DIAPH1 | rs79703349  | S24 | C17orf102   | 1.77E-05 | 1.00E+00    | 7.50E-03    | 6.35E-08 | 1           | 9.53E-05 |
| phe.Fasting_rs149716949S5 | DIAPH1 | rs79781495  | S8  | KPNA3       | 3.43E-16 | 1.40E-08    | 1.13E-12    | 1.08E-14 | 4.39E-07    | 9.34E-11 |
| phe.Fasting_rs149716949S5 | DIAPH1 | rs79886603  | S15 | NA          | 6.66E-09 | 2.72E-01    | 6.42E-06    | 5.36E-08 | 1           | 8.15E-05 |
| phe.Fasting_rs149716949S5 | DIAPH1 | rs80200953  | S8  | PPP2R5D     | 8.53E-18 | 3.48E-10    | 8.87E-14    | 2.83E-08 | 1           | 4.63E-05 |
| phe.Fasting_rs149716949S5 | DIAPH1 | rs80332465  | S5  | KPNA3       | 3.62E-16 | 1.48E-08    | 1.19E-12    | 1.16E-14 | 4.74E-07    | 1.00E-10 |
| phe.Fasting_rs149716949S5 | DIAPH1 | rs80334773  | S5  | KPNA3       | 3.62E-16 | 1.48E-08    | 1.19E-12    | 1.16E-14 | 4.74E-07    | 1.00E-10 |
| phe.Fasting_rs149716949S5 | DIAPH1 | rs891061    | S7  | POP4        | 5.63E-09 | 2.30E-01    | 5.48E-06    | 2.55E-06 | 1           | 2.54E-03 |
| phe.Fasting_rs149791570S5 | DIAPH1 | rs111576333 | S5  | TMEM64      | 5.56E-07 | 1.00E+00    | 3.61E-04    | 7.80E-15 | 3.17E-07    | 6.90E-11 |
| phe.Fasting_rs149791570S5 | DIAPH1 | rs112089881 | S8  | ZFAND4      | 3.24E-18 | 1.32E-10    | 5.45E-14    | 1.95E-10 | 0.00795558  | 5.56E-07 |
| phe.Fasting_rs149791570S5 | DIAPH1 | rs112091318 | S5  | TMEM64      | 1.64E-07 | 1.00E+00    | 1.18E-04    | 9.13E-09 | 0.371559    | 1.72E-05 |
| phe.Fasting_rs149791570S5 | DIAPH1 | rs114334325 | S7  | AP3M2       | 1.25E-15 | 5.12E-08    | 3.65E-12    | 8.81E-08 | 1           | 1.26E-04 |
| phe.Fasting_rs149791570S5 | DIAPH1 | rs114394395 | S7  | AP3M2       | 1.33E-15 | 5.44E-08    | 3.85E-12    | 8.81E-08 | 1           | 1.26E-04 |
| phe.Fasting_rs149791570S5 | DIAPH1 | rs114565620 | S8  | RCL1        | 2.03E-17 | 8.30E-10    | 1.43E-13    | 8.23E-09 | 0.335069    | 1.57E-05 |
| phe.Fasting_rs149791570S5 | DIAPH1 | rs115083290 | S19 | NA          | 8.17E-17 | 3.34E-09    | 3.58E-13    | 2.77E-09 | 0.11274     | 5.90E-06 |
| phe.Fasting_rs149791570S5 | DIAPH1 | rs115752779 | S19 | NA          | 8.17E-17 | 3.34E-09    | 3.58E-13    | 2.77E-09 | 0.11274     | 5.90E-06 |
| phe.Fasting_rs149791570S5 | DIAPH1 | rs115787552 | S5  | KPNA3       | 5.05E-16 | 2.06E-08    | 1.59E-12    | 2.34E-14 | 9.53E-07    | 1.79E-10 |
| phe.Fasting_rs149791570S5 | DIAPH1 | rs115888477 | S8  | NA          | 3.68E-15 | 1.50E-07    | 9.90E-12    | 4.11E-15 | 1.67E-07    | 3.84E-11 |
| phe.Fasting_rs149791570S5 | DIAPH1 | rs116011837 | S9  | BRD2        | 9.60E-12 | 0.000392176 | 1.53E-08    | 9.05E-15 | 3.68E-07    | 7.90E-11 |

|                           |        |                |            |          |          |          |          |             |          |
|---------------------------|--------|----------------|------------|----------|----------|----------|----------|-------------|----------|
| phe.Fasting_rs149791570S5 | DIAPH1 | rs116079984 S8 | KPNA3      | 5.05E-16 | 2.06E-08 | 1.59E-12 | 2.56E-14 | 1.04E-06    | 1.94E-10 |
| phe.Fasting_rs149791570S5 | DIAPH1 | rs116120727 S9 | BRD2       | 9.60E-12 | 3.92E-04 | 1.53E-08 | 9.05E-15 | 3.68E-07    | 7.90E-11 |
| phe.Fasting_rs149791570S5 | DIAPH1 | rs116406581 S2 | NA         | 5.24E-15 | 2.14E-07 | 1.36E-11 | 5.32E-08 | 1           | 8.11E-05 |
| phe.Fasting_rs149791570S5 | DIAPH1 | rs116548615 S8 | TMEM45B    | 2.95E-17 | 1.21E-09 | 1.69E-13 | 1.76E-12 | 7.17E-05    | 7.72E-09 |
| phe.Fasting_rs149791570S5 | DIAPH1 | rs116696844 S3 | AP3M2      | 1.90E-15 | 7.75E-08 | 5.41E-12 | 8.81E-08 | 1           | 1.26E-04 |
| phe.Fasting_rs149791570S5 | DIAPH1 | rs11989304 S4  | TMEM64     | 5.56E-07 | 1.00E+00 | 3.61E-04 | 1.11E-11 | 0.000453381 | 4.10E-08 |
| phe.Fasting_rs149791570S5 | DIAPH1 | rs140524622 S7 | MRPL10     | 1.81E-17 | 7.37E-10 | 1.32E-13 | 2.83E-06 | 1           | 2.79E-03 |
| phe.Fasting_rs149791570S5 | DIAPH1 | rs146815317 S5 | KPNA3      | 5.05E-16 | 2.06E-08 | 1.59E-12 | 2.34E-14 | 9.53E-07    | 1.79E-10 |
| phe.Fasting_rs149791570S5 | DIAPH1 | rs150117838 S8 | KPNA3      | 5.05E-16 | 2.06E-08 | 1.59E-12 | 2.16E-14 | 8.80E-07    | 1.71E-10 |
| phe.Fasting_rs149791570S5 | DIAPH1 | rs150916187 S4 | HIST1H2BK  | 4.14E-06 | 1.00E+00 | 2.11E-03 | 2.61E-15 | 1.06E-07    | 2.55E-11 |
| phe.Fasting_rs149791570S5 | DIAPH1 | rs16894241 S4  | HIST1H2BK  | 3.73E-12 | 1.52E-04 | 6.73E-09 | 6.62E-15 | 2.69E-07    | 5.94E-11 |
| phe.Fasting_rs149791570S5 | DIAPH1 | rs34801978 S3  | HOXB2      | 2.19E-06 | 1.00E+00 | 1.21E-03 | 1.65E-09 | 0.0670533   | 3.72E-06 |
| phe.Fasting_rs149791570S5 | DIAPH1 | rs4732511 S13  | POR        | 9.61E-15 | 3.93E-07 | 2.45E-11 | 2.36E-06 | 1           | 2.39E-03 |
| phe.Fasting_rs149791570S5 | DIAPH1 | rs57503635 S3  | NA         | 1.28E-16 | 5.23E-09 | 5.19E-13 | 6.61E-15 | 2.69E-07    | 5.94E-11 |
| phe.Fasting_rs149791570S5 | DIAPH1 | rs60011869 S16 | NA         | 2.13E-06 | 1.00E+00 | 1.18E-03 | 1.78E-07 | 1           | 2.39E-04 |
| phe.Fasting_rs149791570S5 | DIAPH1 | rs6964407 S7   | POR        | 3.32E-14 | 1.36E-06 | 8.04E-11 | 2.16E-06 | 1           | 2.22E-03 |
| phe.Fasting_rs149791570S5 | DIAPH1 | rs7004597 S8   | NA         | 1.25E-15 | 5.12E-08 | 3.65E-12 | 5.12E-08 | 1           | 7.84E-05 |
| phe.Fasting_rs149791570S5 | DIAPH1 | rs7256517 S7   | CYTH2      | 1.59E-16 | 6.48E-09 | 6.03E-13 | 9.69E-13 | 3.95E-05    | 4.59E-09 |
| phe.Fasting_rs149791570S5 | DIAPH1 | rs73283603 S7  | ZWINT      | 4.49E-07 | 1.00E+00 | 2.97E-04 | 4.53E-08 | 1           | 7.02E-05 |
| phe.Fasting_rs149791570S5 | DIAPH1 | rs73392640 S8  | POLR3B     | 4.58E-11 | 1.87E-03 | 6.24E-08 | 6.82E-12 | 0.000277641 | 2.62E-08 |
| phe.Fasting_rs149791570S5 | DIAPH1 | rs73619637 S8  | NA         | 2.00E-16 | 8.15E-09 | 6.95E-13 | 6.35E-08 | 1           | 9.54E-05 |
| phe.Fasting_rs149791570S5 | DIAPH1 | rs74627895 S8  | TMEM64     | 1.64E-07 | 1.00E+00 | 1.18E-04 | 4.42E-09 | 0.179944    | 8.98E-06 |
| phe.Fasting_rs149791570S5 | DIAPH1 | rs74914207 S24 | NA         | 2.89E-11 | 1.18E-03 | 4.13E-08 | 1.56E-11 | 0.000634366 | 5.60E-08 |
| phe.Fasting_rs149791570S5 | DIAPH1 | rs75350765 S5  | RCL1       | 2.03E-17 | 8.30E-10 | 1.43E-13 | 8.23E-09 | 0.335069    | 1.57E-05 |
| phe.Fasting_rs149791570S5 | DIAPH1 | rs75374128 S5  | CNTLN      | 5.25E-06 | 1.00E+00 | 2.60E-03 | 1.83E-08 | 0.746586    | 3.18E-05 |
| phe.Fasting_rs149791570S5 | DIAPH1 | rs75506779 S5  | TMCO3      | 1.04E-07 | 1.00E+00 | 7.88E-05 | 2.32E-09 | 0.0942949   | 5.04E-06 |
| phe.Fasting_rs149791570S5 | DIAPH1 | rs75758702 S24 | NA         | 1.04E-17 | 4.25E-10 | 9.89E-14 | 2.85E-11 | 0.00115844  | 9.77E-08 |
| phe.Fasting_rs149791570S5 | DIAPH1 | rs75864203 S8  | CNTLN      | 5.25E-06 | 1.00E+00 | 2.60E-03 | 1.83E-08 | 0.746586    | 3.18E-05 |
| phe.Fasting_rs149791570S5 | DIAPH1 | rs75949566 S5  | TMEM64     | 6.52E-07 | 1.00E+00 | 4.16E-04 | 1.49E-11 | 0.000607747 | 5.38E-08 |
| phe.Fasting_rs149791570S5 | DIAPH1 | rs76844308 S8  | CNTLN      | 2.67E-06 | 1.00E+00 | 1.44E-03 | 1.80E-08 | 0.73432     | 3.14E-05 |
| phe.Fasting_rs149791570S5 | DIAPH1 | rs7763107 S8   | FARS2      | 9.44E-17 | 3.86E-09 | 4.06E-13 | 1.60E-12 | 6.52E-05    | 7.13E-09 |
| phe.Fasting_rs149791570S5 | DIAPH1 | rs77798597 S7  | KPNA3      | 5.05E-16 | 2.06E-08 | 1.59E-12 | 2.16E-14 | 8.80E-07    | 1.71E-10 |
| phe.Fasting_rs149791570S5 | DIAPH1 | rs77845645 S21 | NA         | 3.35E-07 | 1.00E+00 | 2.29E-04 | 1.04E-11 | 0.000424266 | 3.85E-08 |
| phe.Fasting_rs149791570S5 | DIAPH1 | rs78353402 S8  | AP3M2      | 1.25E-15 | 5.12E-08 | 3.65E-12 | 8.81E-08 | 1           | 1.26E-04 |
| phe.Fasting_rs149791570S5 | DIAPH1 | rs78516788 S8  | SLC38A1    | 1.24E-06 | 1.00E+00 | 7.38E-04 | 2.76E-09 | 0.112313    | 5.89E-06 |
| phe.Fasting_rs149791570S5 | DIAPH1 | rs78697063 S5  | MSI2       | 7.77E-20 | 3.17E-12 | 2.23E-14 | 1.45E-10 | 0.00591847  | 4.35E-07 |
| phe.Fasting_rs149791570S5 | DIAPH1 | rs78703708 S7  | FAF2       | 7.40E-12 | 3.02E-04 | 1.27E-08 | 7.08E-06 | 1           | 6.12E-03 |
| phe.Fasting_rs149791570S5 | DIAPH1 | rs78722272 S5  | CNTLN      | 5.25E-06 | 1.00E+00 | 2.60E-03 | 1.89E-08 | 0.767323    | 3.26E-05 |
| phe.Fasting_rs149791570S5 | DIAPH1 | rs78736524 S5  | KPNA3      | 5.05E-16 | 2.06E-08 | 1.59E-12 | 2.34E-14 | 9.53E-07    | 1.79E-10 |
| phe.Fasting_rs149791570S5 | DIAPH1 | rs78990344 S2  | LOC1005063 | 5.56E-07 | 1.00E+00 | 3.61E-04 | 1.11E-11 | 0.000453381 | 4.10E-08 |



|              |                |             |             |     |           |          |            |            |          |             |          |
|--------------|----------------|-------------|-------------|-----|-----------|----------|------------|------------|----------|-------------|----------|
| phe.Fasting_ | rs149791570S5  | DIAPH1      | rs79781495  | S8  | KPNA3     | 5.05E-16 | 2.06E-08   | 1.59E-12   | 2.16E-14 | 8.80E-07    | 1.71E-10 |
| phe.Fasting_ | rs149791570S5  | DIAPH1      | rs80200953  | S8  | PPP2R5D   | 1.41E-17 | 5.76E-10   | 1.14E-13   | 8.37E-10 | 0.034062    | 2.03E-06 |
| phe.Fasting_ | rs149791570S5  | DIAPH1      | rs80332465  | S5  | KPNA3     | 5.36E-16 | 2.19E-08   | 1.67E-12   | 2.32E-14 | 9.45E-07    | 1.79E-10 |
| phe.Fasting_ | rs149791570S5  | DIAPH1      | rs80334773  | S5  | KPNA3     | 5.36E-16 | 2.19E-08   | 1.67E-12   | 2.32E-14 | 9.45E-07    | 1.79E-10 |
| phe.Fasting_ | rs149791570S5  | DIAPH1      | rs891061    | S7  | POP4      | 6.59E-07 | 1.00E+00   | 4.20E-04   | 1.19E-05 | 1           | 9.35E-03 |
| phe.Fasting_ | rs150117838S8  | KPNA3       | rs140524622 | S7  | MRPL10    | 3.78E-08 | 1.00E+00   | 3.18E-05   | 1.50E-16 | 6.10E-09    | 6.88E-12 |
| phe.Fasting_ | rs150117838S8  | KPNA3       | rs57503635  | S3  | NA        | 1.29E-15 | 5.25E-08   | 3.74E-12   | 4.13E-15 | 1.68E-07    | 3.85E-11 |
| phe.Fasting_ | rs150117838S8  | KPNA3       | rs7256517   | S7  | CYTH2     | 1.78E-05 | 1.00E+00   | 7.54E-03   | 1.34E-06 | 1           | 1.47E-03 |
| phe.Fasting_ | rs150117838S8  | KPNA3       | rs75506779  | S5  | TMCO3     | 2.52E-06 | 1          | 0.00136748 | 2.40E-15 | 9.76E-08    | 2.35E-11 |
| phe.Fasting_ | rs150452206S13 | "DIAPH1,LOC | rs111576333 | S5  | TMEM64    | 2.37E-06 | 1          | 0.00129547 | 5.87E-14 | 2.39E-06    | 3.99E-10 |
| phe.Fasting_ | rs150452206S13 | "DIAPH1,LOC | rs112089881 | S8  | ZFAND4    | 2.04E-17 | 8.32E-10   | 1.43E-13   | 1.09E-09 | 0.0445256   | 2.58E-06 |
| phe.Fasting_ | rs150452206S13 | "DIAPH1,LOC | rs112091318 | S5  | TMEM64    | 7.32E-07 | 1.00E+00   | 4.60E-04   | 3.91E-08 | 1           | 6.13E-05 |
| phe.Fasting_ | rs150452206S13 | "DIAPH1,LOC | rs114334325 | S7  | AP3M2     | 4.51E-15 | 1.84E-07   | 1.18E-11   | 3.87E-07 | 1           | 4.75E-04 |
| phe.Fasting_ | rs150452206S13 | "DIAPH1,LOC | rs114394395 | S7  | AP3M2     | 4.81E-15 | 1.97E-07   | 1.25E-11   | 3.87E-07 | 1           | 4.75E-04 |
| phe.Fasting_ | rs150452206S13 | "DIAPH1,LOC | rs114565620 | S8  | RCL1      | 1.82E-16 | 7.42E-09   | 6.37E-13   | 3.70E-08 | 1           | 5.84E-05 |
| phe.Fasting_ | rs150452206S13 | "DIAPH1,LOC | rs115083290 | S19 | NA        | 4.38E-16 | 1.79E-08   | 1.40E-12   | 1.42E-08 | 0.576679    | 2.53E-05 |
| phe.Fasting_ | rs150452206S13 | "DIAPH1,LOC | rs11524145  | S5  | CDK6      | 7.80E-07 | 1.00E+00   | 4.86E-04   | 7.89E-06 | 1           | 6.69E-03 |
| phe.Fasting_ | rs150452206S13 | "DIAPH1,LOC | rs115752779 | S19 | NA        | 4.38E-16 | 1.79E-08   | 1.40E-12   | 1.42E-08 | 0.576679    | 2.53E-05 |
| phe.Fasting_ | rs150452206S13 | "DIAPH1,LOC | rs115787552 | S5  | KPNA3     | 2.97E-15 | 1.21E-07   | 8.14E-12   | 1.18E-13 | 4.80E-06    | 7.06E-10 |
| phe.Fasting_ | rs150452206S13 | "DIAPH1,LOC | rs115888477 | S8  | NA        | 2.03E-14 | 8.28E-07   | 5.02E-11   | 2.21E-14 | 8.99E-07    | 1.73E-10 |
| phe.Fasting_ | rs150452206S13 | "DIAPH1,LOC | rs116011837 | S9  | BRD2      | 4.89E-11 | 0.00199774 | 6.62E-08   | 4.07E-14 | 1.66E-06    | 2.85E-10 |
| phe.Fasting_ | rs150452206S13 | "DIAPH1,LOC | rs116079984 | S8  | KPNA3     | 2.97E-15 | 1.21E-07   | 8.14E-12   | 1.24E-13 | 5.04E-06    | 7.34E-10 |
| phe.Fasting_ | rs150452206S13 | "DIAPH1,LOC | rs116120727 | S9  | BRD2      | 4.89E-11 | 0.00199774 | 6.62E-08   | 4.07E-14 | 1.66E-06    | 2.85E-10 |
| phe.Fasting_ | rs150452206S13 | "DIAPH1,LOC | rs116406581 | S2  | NA        | 1.81E-14 | 7.39E-07   | 4.52E-11   | 2.35E-07 | 1           | 3.05E-04 |
| phe.Fasting_ | rs150452206S13 | "DIAPH1,LOC | rs116548615 | S8  | TMEM45B   | 1.73E-16 | 7.06E-09   | 6.15E-13   | 8.70E-12 | 0.000354153 | 3.26E-08 |
| phe.Fasting_ | rs150452206S13 | "DIAPH1,LOC | rs116696844 | S3  | AP3M2     | 6.92E-15 | 2.83E-07   | 1.78E-11   | 3.87E-07 | 1           | 4.75E-04 |
| phe.Fasting_ | rs150452206S13 | "DIAPH1,LOC | rs11989304  | S4  | TMEM64    | 2.37E-06 | 1          | 1.30E-03   | 6.78E-11 | 0.00276161  | 2.13E-07 |
| phe.Fasting_ | rs150452206S13 | "DIAPH1,LOC | rs140524622 | S7  | MRPL10    | 1.08E-16 | 4.41E-09   | 4.54E-13   | 7.35E-06 | 1           | 6.31E-03 |
| phe.Fasting_ | rs150452206S13 | "DIAPH1,LOC | rs146815317 | S5  | KPNA3     | 2.97E-15 | 1.21E-07   | 8.14E-12   | 1.18E-13 | 4.80E-06    | 7.06E-10 |
| phe.Fasting_ | rs150452206S13 | "DIAPH1,LOC | rs150117838 | S8  | KPNA3     | 2.97E-15 | 1.21E-07   | 8.14E-12   | 1.09E-13 | 4.44E-06    | 6.79E-10 |
| phe.Fasting_ | rs150452206S13 | "DIAPH1,LOC | rs150916187 | S4  | HIST1H2BK | 1.38E-05 | 1.00E+00   | 6.05E-03   | 1.37E-14 | 5.59E-07    | 1.16E-10 |
| phe.Fasting_ | rs150452206S13 | "DIAPH1,LOC | rs16894241  | S4  | HIST1H2BK | 1.99E-11 | 8.12E-04   | 2.96E-08   | 3.44E-14 | 1.40E-06    | 2.50E-10 |
| phe.Fasting_ | rs150452206S13 | "DIAPH1,LOC | rs2032062   | S8  | NA        | 1.22E-14 | 4.98E-07   | 3.09E-11   | 8.48E-06 | 1           | 7.14E-03 |
| phe.Fasting_ | rs150452206S13 | "DIAPH1,LOC | rs2153597   | S8  | ZNF438    | 5.51E-11 | 2.25E-03   | 7.42E-08   | 4.52E-09 | 0.183916    | 9.08E-06 |
| phe.Fasting_ | rs150452206S13 | "DIAPH1,LOC | rs2835656   | S7  | TTC3      | 3.01E-10 | 1.23E-02   | 3.60E-07   | 9.12E-06 | 1           | 7.57E-03 |
| phe.Fasting_ | rs150452206S13 | "DIAPH1,LOC | rs34801978  | S3  | HOXB2     | 1.23E-05 | 1.00E+00   | 5.46E-03   | 1.03E-08 | 0.419057    | 1.90E-05 |
| phe.Fasting_ | rs150452206S13 | "DIAPH1,LOC | rs352346    | S3  | GRPEL2    | 1.85E-11 | 7.55E-04   | 2.78E-08   | 8.42E-06 | 1           | 7.10E-03 |
| phe.Fasting_ | rs150452206S13 | "DIAPH1,LOC | rs3750898   | S8  | DCLRE1A   | 2.29E-05 | 1.00E+00   | 9.35E-03   | 8.76E-06 | 1           | 7.32E-03 |
| phe.Fasting_ | rs150452206S13 | "DIAPH1,LOC | rs4732511   | S13 | POR       | 2.30E-15 | 9.39E-08   | 6.48E-12   | 9.65E-06 | 1           | 7.93E-03 |
| phe.Fasting_ | rs150452206S13 | "DIAPH1,LOC | rs57503635  | S3  | NA        | 6.34E-16 | 2.59E-08   | 1.95E-12   | 3.17E-14 | 1.29E-06    | 2.34E-10 |

|                            |                       |     |             |          |          |          |          |             |          |
|----------------------------|-----------------------|-----|-------------|----------|----------|----------|----------|-------------|----------|
| phe.Fasting_rs150452206S13 | "DIAPH1,LOCrs58905476 | S7  | TTC3        | 3.29E-10 | 1.34E-02 | 3.90E-07 | 9.79E-06 | 1           | 8.01E-03 |
| phe.Fasting_rs150452206S13 | "DIAPH1,LOCrs60011869 | S16 | NA          | 1.04E-05 | 1.00E+00 | 4.72E-03 | 8.16E-10 | 0.0332257   | 1.98E-06 |
| phe.Fasting_rs150452206S13 | "DIAPH1,LOCrs6964407  | S7  | POR         | 7.55E-15 | 3.08E-07 | 1.94E-11 | 8.91E-06 | 1           | 7.43E-03 |
| phe.Fasting_rs150452206S13 | "DIAPH1,LOCrs7004597  | S8  | NA          | 4.51E-15 | 1.84E-07 | 1.18E-11 | 2.34E-07 | 1           | 3.04E-04 |
| phe.Fasting_rs150452206S13 | "DIAPH1,LOCrs7256517  | S7  | CYTH2       | 1.04E-15 | 4.24E-08 | 3.06E-12 | 4.82E-12 | 0.000196022 | 1.91E-08 |
| phe.Fasting_rs150452206S13 | "DIAPH1,LOCrs73283603 | S7  | ZWINT       | 1.90E-06 | 1.00E+00 | 1.07E-03 | 2.03E-07 | 1           | 2.68E-04 |
| phe.Fasting_rs150452206S13 | "DIAPH1,LOCrs73392640 | S8  | POLR3B      | 2.02E-10 | 8.26E-03 | 2.49E-07 | 5.19E-11 | 0.00211214  | 1.67E-07 |
| phe.Fasting_rs150452206S13 | "DIAPH1,LOCrs734069   | S19 | NA          | 2.06E-08 | 8.39E-01 | 1.81E-05 | 6.71E-10 | 0.0272994   | 1.68E-06 |
| phe.Fasting_rs150452206S13 | "DIAPH1,LOCrs73619637 | S8  | NA          | 1.44E-15 | 5.89E-08 | 4.14E-12 | 2.05E-10 | 0.00833668  | 5.78E-07 |
| phe.Fasting_rs150452206S13 | "DIAPH1,LOCrs74627895 | S8  | TMEM64      | 7.32E-07 | 1.00E+00 | 4.60E-04 | 2.03E-08 | 0.828094    | 3.48E-05 |
| phe.Fasting_rs150452206S13 | "DIAPH1,LOCrs74914207 | S24 | NA          | 1.37E-10 | 5.59E-03 | 1.73E-07 | 9.12E-11 | 0.0037135   | 2.80E-07 |
| phe.Fasting_rs150452206S13 | "DIAPH1,LOCrs75350765 | S5  | RCL1        | 1.82E-16 | 7.42E-09 | 6.37E-13 | 3.70E-08 | 1           | 5.84E-05 |
| phe.Fasting_rs150452206S13 | "DIAPH1,LOCrs75374128 | S5  | CNTLN       | 1.47E-16 | 6.01E-09 | 5.72E-13 | 1.01E-07 | 1           | 1.42E-04 |
| phe.Fasting_rs150452206S13 | "DIAPH1,LOCrs75506779 | S5  | TMCO3       | 5.55E-07 | 1.00E+00 | 3.61E-04 | 1.10E-08 | 0.449707    | 2.03E-05 |
| phe.Fasting_rs150452206S13 | "DIAPH1,LOCrs75758702 | S24 | NA          | 7.02E-17 | 2.87E-09 | 3.16E-13 | 1.57E-10 | 0.00638323  | 4.59E-07 |
| phe.Fasting_rs150452206S13 | "DIAPH1,LOCrs75864203 | S8  | CNTLN       | 1.47E-16 | 6.01E-09 | 5.72E-13 | 1.01E-07 | 1           | 1.42E-04 |
| phe.Fasting_rs150452206S13 | "DIAPH1,LOCrs75949566 | S5  | TMEM64      | 2.76E-06 | 1.00E+00 | 1.47E-03 | 8.48E-11 | 0.00345267  | 2.62E-07 |
| phe.Fasting_rs150452206S13 | "DIAPH1,LOCrs76844308 | S8  | CNTLN       | 7.68E-17 | 3.14E-09 | 3.41E-13 | 9.52E-08 | 1           | 1.35E-04 |
| phe.Fasting_rs150452206S13 | "DIAPH1,LOCrs7763107  | S8  | FARS2       | 5.78E-16 | 2.36E-08 | 1.79E-12 | 9.23E-12 | 0.000375564 | 3.44E-08 |
| phe.Fasting_rs150452206S13 | "DIAPH1,LOCrs77798597 | S7  | KPNA3       | 2.97E-15 | 1.21E-07 | 8.14E-12 | 1.09E-13 | 4.44E-06    | 6.79E-10 |
| phe.Fasting_rs150452206S13 | "DIAPH1,LOCrs77845645 | S21 | NA          | 1.53E-06 | 1.00E+00 | 8.88E-04 | 4.20E-11 | 0.00170882  | 1.38E-07 |
| phe.Fasting_rs150452206S13 | "DIAPH1,LOCrs78353402 | S8  | AP3M2       | 4.51E-15 | 1.84E-07 | 1.18E-11 | 3.87E-07 | 1           | 4.75E-04 |
| phe.Fasting_rs150452206S13 | "DIAPH1,LOCrs78516788 | S8  | SLC38A1     | 2.75E-11 | 1.12E-03 | 3.94E-08 | 2.44E-10 | 0.00992686  | 6.74E-07 |
| phe.Fasting_rs150452206S13 | "DIAPH1,LOCrs78697063 | S5  | MSI2        | 8.23E-19 | 3.36E-11 | 2.70E-14 | 6.84E-10 | 0.0278369   | 1.70E-06 |
| phe.Fasting_rs150452206S13 | "DIAPH1,LOCrs78722272 | S5  | CNTLN       | 1.47E-16 | 6.01E-09 | 5.72E-13 | 1.05E-07 | 1           | 1.48E-04 |
| phe.Fasting_rs150452206S13 | "DIAPH1,LOCrs78736524 | S5  | KPNA3       | 2.97E-15 | 1.21E-07 | 8.14E-12 | 1.18E-13 | 4.80E-06    | 7.06E-10 |
| phe.Fasting_rs150452206S13 | "DIAPH1,LOCrs78990344 | S2  | LOC1005063! | 2.37E-06 | 1.00E+00 | 1.30E-03 | 6.78E-11 | 0.00276161  | 2.13E-07 |
| phe.Fasting_rs150452206S13 | "DIAPH1,LOCrs79781495 | S8  | KPNA3       | 2.97E-15 | 1.21E-07 | 8.14E-12 | 1.09E-13 | 4.44E-06    | 6.79E-10 |
| phe.Fasting_rs150452206S13 | "DIAPH1,LOCrs79886603 | S15 | NA          | 8.71E-08 | 1.00E+00 | 6.74E-05 | 4.66E-07 | 1           | 5.59E-04 |
| phe.Fasting_rs150452206S13 | "DIAPH1,LOCrs80200953 | S8  | PPP2R5D     | 8.49E-17 | 3.47E-09 | 3.69E-13 | 3.65E-09 | 0.148399    | 7.55E-06 |
| phe.Fasting_rs150452206S13 | "DIAPH1,LOCrs80332465 | S5  | KPNA3       | 3.13E-15 | 1.28E-07 | 8.51E-12 | 1.17E-13 | 4.77E-06    | 7.06E-10 |
| phe.Fasting_rs150452206S13 | "DIAPH1,LOCrs80334773 | S5  | KPNA3       | 3.13E-15 | 1.28E-07 | 8.51E-12 | 1.17E-13 | 4.77E-06    | 7.06E-10 |
| phe.Fasting_rs150675915S7  | DIAPH1 rs111576333    | S5  | TMEM64      | 2.37E-06 | 1.00E+00 | 1.30E-03 | 5.87E-14 | 2.39E-06    | 3.99E-10 |
| phe.Fasting_rs150675915S7  | DIAPH1 rs112089881    | S8  | ZFAND4      | 2.04E-17 | 8.32E-10 | 1.43E-13 | 1.09E-09 | 0.0445256   | 2.58E-06 |
| phe.Fasting_rs150675915S7  | DIAPH1 rs112091318    | S5  | TMEM64      | 7.32E-07 | 1.00E+00 | 4.60E-04 | 3.91E-08 | 1           | 6.13E-05 |
| phe.Fasting_rs150675915S7  | DIAPH1 rs114334325    | S7  | AP3M2       | 4.51E-15 | 1.84E-07 | 1.18E-11 | 3.87E-07 | 1           | 4.75E-04 |
| phe.Fasting_rs150675915S7  | DIAPH1 rs114394395    | S7  | AP3M2       | 4.81E-15 | 1.97E-07 | 1.25E-11 | 3.87E-07 | 1           | 4.75E-04 |
| phe.Fasting_rs150675915S7  | DIAPH1 rs114565620    | S8  | RCL1        | 1.82E-16 | 7.42E-09 | 6.37E-13 | 3.70E-08 | 1           | 5.84E-05 |
| phe.Fasting_rs150675915S7  | DIAPH1 rs115083290    | S19 | NA          | 4.38E-16 | 1.79E-08 | 1.40E-12 | 1.42E-08 | 0.576679    | 2.53E-05 |
| phe.Fasting_rs150675915S7  | DIAPH1 rs11524145     | S5  | CDK6        | 7.80E-07 | 1.00E+00 | 4.86E-04 | 7.89E-06 | 1           | 6.69E-03 |

|                           |        |                |           |          |             |            |          |             |          |
|---------------------------|--------|----------------|-----------|----------|-------------|------------|----------|-------------|----------|
| phe.Fasting_rs150675915S7 | DIAPH1 | rs115752779S19 | NA        | 4.38E-16 | 1.79E-08    | 1.40E-12   | 1.42E-08 | 0.576679    | 2.53E-05 |
| phe.Fasting_rs150675915S7 | DIAPH1 | rs115787552S5  | KPNA3     | 2.97E-15 | 1.21E-07    | 8.14E-12   | 1.18E-13 | 4.80E-06    | 7.06E-10 |
| phe.Fasting_rs150675915S7 | DIAPH1 | rs115888477S8  | NA        | 2.03E-14 | 8.28E-07    | 5.02E-11   | 2.21E-14 | 8.99E-07    | 1.73E-10 |
| phe.Fasting_rs150675915S7 | DIAPH1 | rs116011837S9  | BRD2      | 4.89E-11 | 2.00E-03    | 6.62E-08   | 4.07E-14 | 1.66E-06    | 2.85E-10 |
| phe.Fasting_rs150675915S7 | DIAPH1 | rs116079984S8  | KPNA3     | 2.97E-15 | 1.21E-07    | 8.14E-12   | 1.24E-13 | 5.04E-06    | 7.34E-10 |
| phe.Fasting_rs150675915S7 | DIAPH1 | rs116120727S9  | BRD2      | 4.89E-11 | 2.00E-03    | 6.62E-08   | 4.07E-14 | 1.66E-06    | 2.85E-10 |
| phe.Fasting_rs150675915S7 | DIAPH1 | rs116406581S2  | NA        | 1.81E-14 | 7.39E-07    | 4.52E-11   | 2.35E-07 | 1           | 3.05E-04 |
| phe.Fasting_rs150675915S7 | DIAPH1 | rs116548615S8  | TMEM45B   | 1.73E-16 | 7.06E-09    | 6.15E-13   | 8.70E-12 | 0.000354153 | 3.26E-08 |
| phe.Fasting_rs150675915S7 | DIAPH1 | rs116696844S3  | AP3M2     | 6.92E-15 | 2.83E-07    | 1.78E-11   | 3.87E-07 | 1           | 4.75E-04 |
| phe.Fasting_rs150675915S7 | DIAPH1 | rs11989304 S4  | TMEM64    | 2.37E-06 | 1.00E+00    | 1.30E-03   | 6.78E-11 | 0.00276161  | 2.13E-07 |
| phe.Fasting_rs150675915S7 | DIAPH1 | rs140524622S7  | MRPL10    | 1.08E-16 | 4.41E-09    | 4.54E-13   | 7.35E-06 | 1           | 6.31E-03 |
| phe.Fasting_rs150675915S7 | DIAPH1 | rs146815317S5  | KPNA3     | 2.97E-15 | 1.21E-07    | 8.14E-12   | 1.18E-13 | 4.80E-06    | 7.06E-10 |
| phe.Fasting_rs150675915S7 | DIAPH1 | rs150117838S8  | KPNA3     | 2.97E-15 | 1.21E-07    | 8.14E-12   | 1.09E-13 | 4.44E-06    | 6.79E-10 |
| phe.Fasting_rs150675915S7 | DIAPH1 | rs150916187S4  | HIST1H2BK | 1.38E-05 | 1           | 0.00605332 | 1.37E-14 | 5.59E-07    | 1.16E-10 |
| phe.Fasting_rs150675915S7 | DIAPH1 | rs16894241 S4  | HIST1H2BK | 1.99E-11 | 0.000812315 | 2.96E-08   | 3.44E-14 | 1.40E-06    | 2.50E-10 |
| phe.Fasting_rs150675915S7 | DIAPH1 | rs2032062 S8   | NA        | 1.22E-14 | 4.98E-07    | 3.09E-11   | 8.48E-06 | 1           | 7.14E-03 |
| phe.Fasting_rs150675915S7 | DIAPH1 | rs2153597 S8   | ZNF438    | 5.51E-11 | 0.00224928  | 7.42E-08   | 4.52E-09 | 0.183916    | 9.08E-06 |
| phe.Fasting_rs150675915S7 | DIAPH1 | rs2835656 S7   | TTC3      | 3.01E-10 | 0.0122766   | 3.60E-07   | 9.12E-06 | 1           | 7.57E-03 |
| phe.Fasting_rs150675915S7 | DIAPH1 | rs34801978 S3  | HOXB2     | 1.23E-05 | 1           | 0.00545724 | 1.03E-08 | 0.419057    | 1.90E-05 |
| phe.Fasting_rs150675915S7 | DIAPH1 | rs352346 S3    | GRPEL2    | 1.85E-11 | 0.000754995 | 2.78E-08   | 8.42E-06 | 1           | 7.10E-03 |
| phe.Fasting_rs150675915S7 | DIAPH1 | rs3750898 S8   | DCLRE1A   | 2.29E-05 | 1           | 0.0093502  | 8.76E-06 | 1           | 7.32E-03 |
| phe.Fasting_rs150675915S7 | DIAPH1 | rs4732511 S13  | POR       | 2.30E-15 | 9.39E-08    | 6.48E-12   | 9.65E-06 | 1           | 7.93E-03 |
| phe.Fasting_rs150675915S7 | DIAPH1 | rs57503635 S3  | NA        | 6.34E-16 | 2.59E-08    | 1.95E-12   | 3.17E-14 | 1.29E-06    | 2.34E-10 |
| phe.Fasting_rs150675915S7 | DIAPH1 | rs58905476 S7  | TTC3      | 3.29E-10 | 0.0134302   | 3.90E-07   | 9.79E-06 | 1           | 8.01E-03 |
| phe.Fasting_rs150675915S7 | DIAPH1 | rs60011869 S16 | NA        | 1.04E-05 | 1.00E+00    | 4.72E-03   | 8.16E-10 | 0.0332257   | 1.98E-06 |
| phe.Fasting_rs150675915S7 | DIAPH1 | rs6964407 S7   | POR       | 7.55E-15 | 3.08E-07    | 1.94E-11   | 8.91E-06 | 1           | 7.43E-03 |
| phe.Fasting_rs150675915S7 | DIAPH1 | rs7004597 S8   | NA        | 4.51E-15 | 1.84E-07    | 1.18E-11   | 2.34E-07 | 1           | 3.04E-04 |
| phe.Fasting_rs150675915S7 | DIAPH1 | rs7256517 S7   | CYTH2     | 1.04E-15 | 4.24E-08    | 3.06E-12   | 4.82E-12 | 0.000196022 | 1.91E-08 |
| phe.Fasting_rs150675915S7 | DIAPH1 | rs73283603 S7  | ZWINT     | 1.90E-06 | 1.00E+00    | 1.07E-03   | 2.03E-07 | 1           | 2.68E-04 |
| phe.Fasting_rs150675915S7 | DIAPH1 | rs73392640 S8  | POLR3B    | 2.02E-10 | 8.26E-03    | 2.49E-07   | 5.19E-11 | 0.00211214  | 1.67E-07 |
| phe.Fasting_rs150675915S7 | DIAPH1 | rs734069 S19   | NA        | 2.06E-08 | 8.39E-01    | 1.81E-05   | 6.71E-10 | 0.0272994   | 1.68E-06 |
| phe.Fasting_rs150675915S7 | DIAPH1 | rs73619637 S8  | NA        | 1.44E-15 | 5.89E-08    | 4.14E-12   | 2.05E-10 | 0.00833668  | 5.78E-07 |
| phe.Fasting_rs150675915S7 | DIAPH1 | rs74627895 S8  | TMEM64    | 7.32E-07 | 1.00E+00    | 4.60E-04   | 2.03E-08 | 0.828094    | 3.48E-05 |
| phe.Fasting_rs150675915S7 | DIAPH1 | rs74914207 S24 | NA        | 1.37E-10 | 5.59E-03    | 1.73E-07   | 9.12E-11 | 0.0037135   | 2.80E-07 |
| phe.Fasting_rs150675915S7 | DIAPH1 | rs75350765 S5  | RCL1      | 1.82E-16 | 7.42E-09    | 6.37E-13   | 3.70E-08 | 1           | 5.84E-05 |
| phe.Fasting_rs150675915S7 | DIAPH1 | rs75374128 S5  | CNTLN     | 1.47E-16 | 6.01E-09    | 5.72E-13   | 1.01E-07 | 1           | 1.42E-04 |
| phe.Fasting_rs150675915S7 | DIAPH1 | rs75506779 S5  | TMCO3     | 5.55E-07 | 1.00E+00    | 3.61E-04   | 1.10E-08 | 0.449707    | 2.03E-05 |
| phe.Fasting_rs150675915S7 | DIAPH1 | rs75758702 S24 | NA        | 7.02E-17 | 2.87E-09    | 3.16E-13   | 1.57E-10 | 0.00638323  | 4.59E-07 |
| phe.Fasting_rs150675915S7 | DIAPH1 | rs75864203 S8  | CNTLN     | 1.47E-16 | 6.01E-09    | 5.72E-13   | 1.01E-07 | 1           | 1.42E-04 |
| phe.Fasting_rs150675915S7 | DIAPH1 | rs75949566 S5  | TMEM64    | 2.76E-06 | 1.00E+00    | 1.47E-03   | 8.48E-11 | 0.00345267  | 2.62E-07 |

|                            |        |             |     |             |          |            |          |          |             |          |
|----------------------------|--------|-------------|-----|-------------|----------|------------|----------|----------|-------------|----------|
| phe.Fasting_rs150675915S7  | DIAPH1 | rs76844308  | S8  | CNTLN       | 7.68E-17 | 3.14E-09   | 3.41E-13 | 9.52E-08 | 1           | 1.35E-04 |
| phe.Fasting_rs150675915S7  | DIAPH1 | rs7763107   | S8  | FARS2       | 5.78E-16 | 2.36E-08   | 1.79E-12 | 9.23E-12 | 0.000375564 | 3.44E-08 |
| phe.Fasting_rs150675915S7  | DIAPH1 | rs77798597  | S7  | KPNA3       | 2.97E-15 | 1.21E-07   | 8.14E-12 | 1.09E-13 | 4.44E-06    | 6.79E-10 |
| phe.Fasting_rs150675915S7  | DIAPH1 | rs77845645  | S21 | NA          | 1.53E-06 | 1          | 8.88E-04 | 4.20E-11 | 0.00170882  | 1.38E-07 |
| phe.Fasting_rs150675915S7  | DIAPH1 | rs78353402  | S8  | AP3M2       | 4.51E-15 | 1.84E-07   | 1.18E-11 | 3.87E-07 | 1           | 4.75E-04 |
| phe.Fasting_rs150675915S7  | DIAPH1 | rs78516788  | S8  | SLC38A1     | 2.75E-11 | 0.00112269 | 3.94E-08 | 2.44E-10 | 0.00992686  | 6.74E-07 |
| phe.Fasting_rs150675915S7  | DIAPH1 | rs78697063  | S5  | MSI2        | 8.23E-19 | 3.36E-11   | 2.70E-14 | 6.84E-10 | 0.0278369   | 1.70E-06 |
| phe.Fasting_rs150675915S7  | DIAPH1 | rs78722272  | S5  | CNTLN       | 1.47E-16 | 6.01E-09   | 5.72E-13 | 1.05E-07 | 1           | 1.48E-04 |
| phe.Fasting_rs150675915S7  | DIAPH1 | rs78736524  | S5  | KPNA3       | 2.97E-15 | 1.21E-07   | 8.14E-12 | 1.18E-13 | 4.80E-06    | 7.06E-10 |
| phe.Fasting_rs150675915S7  | DIAPH1 | rs78990344  | S2  | LOC1005063  | 2.37E-06 | 1          | 1.30E-03 | 6.78E-11 | 0.00276161  | 2.13E-07 |
| phe.Fasting_rs150675915S7  | DIAPH1 | rs79781495  | S8  | KPNA3       | 2.97E-15 | 1.21E-07   | 8.14E-12 | 1.09E-13 | 4.44E-06    | 6.79E-10 |
| phe.Fasting_rs150675915S7  | DIAPH1 | rs79886603  | S15 | NA          | 8.71E-08 | 1          | 6.74E-05 | 4.66E-07 | 1           | 5.59E-04 |
| phe.Fasting_rs150675915S7  | DIAPH1 | rs80200953  | S8  | PPP2R5D     | 8.49E-17 | 3.47E-09   | 3.69E-13 | 3.65E-09 | 0.148399    | 7.55E-06 |
| phe.Fasting_rs150675915S7  | DIAPH1 | rs80332465  | S5  | KPNA3       | 3.13E-15 | 1.28E-07   | 8.51E-12 | 1.17E-13 | 4.77E-06    | 7.06E-10 |
| phe.Fasting_rs150675915S7  | DIAPH1 | rs80334773  | S5  | KPNA3       | 3.13E-15 | 1.28E-07   | 8.51E-12 | 1.17E-13 | 4.77E-06    | 7.06E-10 |
| phe.Fasting_rs150738496S23 | HLA-G  | rs114764631 | S23 | NA          | 2.82E-07 | 1          | 1.96E-04 | 4.13E-09 | 0.168229    | 8.45E-06 |
| phe.Fasting_rs150738496S23 | HLA-G  | rs139070959 | S8  | RPN2        | 1.85E-09 | 0.0755239  | 1.94E-06 | 2.41E-06 | 1           | 2.43E-03 |
| phe.Fasting_rs150738496S23 | HLA-G  | rs145412529 | S8  | "RBL1,RPS3A | 1.03E-09 | 0.0420988  | 1.13E-06 | 2.51E-06 | 1           | 2.51E-03 |
| phe.Fasting_rs150765570S7  | DIAPH1 | rs111576333 | S5  | TMEM64      | 2.37E-06 | 1          | 1.30E-03 | 5.87E-14 | 2.39E-06    | 3.99E-10 |
| phe.Fasting_rs150765570S7  | DIAPH1 | rs112089881 | S8  | ZFAND4      | 2.04E-17 | 8.32E-10   | 1.43E-13 | 1.09E-09 | 0.0445256   | 2.58E-06 |
| phe.Fasting_rs150765570S7  | DIAPH1 | rs112091318 | S5  | TMEM64      | 7.32E-07 | 1          | 4.60E-04 | 3.91E-08 | 1           | 6.13E-05 |
| phe.Fasting_rs150765570S7  | DIAPH1 | rs114334325 | S7  | AP3M2       | 4.51E-15 | 1.84E-07   | 1.18E-11 | 3.87E-07 | 1           | 4.75E-04 |
| phe.Fasting_rs150765570S7  | DIAPH1 | rs114394395 | S7  | AP3M2       | 4.81E-15 | 1.97E-07   | 1.25E-11 | 3.87E-07 | 1           | 4.75E-04 |
| phe.Fasting_rs150765570S7  | DIAPH1 | rs114565620 | S8  | RCL1        | 1.82E-16 | 7.42E-09   | 6.37E-13 | 3.70E-08 | 1           | 5.84E-05 |
| phe.Fasting_rs150765570S7  | DIAPH1 | rs115083290 | S19 | NA          | 4.38E-16 | 1.79E-08   | 1.40E-12 | 1.42E-08 | 0.576679    | 2.53E-05 |
| phe.Fasting_rs150765570S7  | DIAPH1 | rs11524145  | S5  | CDK6        | 7.80E-07 | 1          | 4.86E-04 | 7.89E-06 | 1           | 6.69E-03 |
| phe.Fasting_rs150765570S7  | DIAPH1 | rs115752779 | S19 | NA          | 4.38E-16 | 1.79E-08   | 1.40E-12 | 1.42E-08 | 0.576679    | 2.53E-05 |
| phe.Fasting_rs150765570S7  | DIAPH1 | rs115787552 | S5  | KPNA3       | 2.97E-15 | 1.21E-07   | 8.14E-12 | 1.18E-13 | 4.80E-06    | 7.06E-10 |
| phe.Fasting_rs150765570S7  | DIAPH1 | rs115888477 | S8  | NA          | 2.03E-14 | 8.28E-07   | 5.02E-11 | 2.21E-14 | 8.99E-07    | 1.73E-10 |
| phe.Fasting_rs150765570S7  | DIAPH1 | rs116011837 | S9  | BRD2        | 4.89E-11 | 0.00199774 | 6.62E-08 | 4.07E-14 | 1.66E-06    | 2.85E-10 |
| phe.Fasting_rs150765570S7  | DIAPH1 | rs116079984 | S8  | KPNA3       | 2.97E-15 | 1.21E-07   | 8.14E-12 | 1.24E-13 | 5.04E-06    | 7.34E-10 |
| phe.Fasting_rs150765570S7  | DIAPH1 | rs116120727 | S9  | BRD2        | 4.89E-11 | 0.00199774 | 6.62E-08 | 4.07E-14 | 1.66E-06    | 2.85E-10 |
| phe.Fasting_rs150765570S7  | DIAPH1 | rs116406581 | S2  | NA          | 1.81E-14 | 7.39E-07   | 4.52E-11 | 2.35E-07 | 1           | 3.05E-04 |
| phe.Fasting_rs150765570S7  | DIAPH1 | rs116548615 | S8  | TMEM45B     | 1.73E-16 | 7.06E-09   | 6.15E-13 | 8.70E-12 | 0.000354153 | 3.26E-08 |
| phe.Fasting_rs150765570S7  | DIAPH1 | rs116696844 | S3  | AP3M2       | 6.92E-15 | 2.83E-07   | 1.78E-11 | 3.87E-07 | 1           | 4.75E-04 |
| phe.Fasting_rs150765570S7  | DIAPH1 | rs11989304  | S4  | TMEM64      | 2.37E-06 | 1          | 1.30E-03 | 6.78E-11 | 0.00276161  | 2.13E-07 |
| phe.Fasting_rs150765570S7  | DIAPH1 | rs140524622 | S7  | MRPL10      | 1.08E-16 | 4.41E-09   | 4.54E-13 | 7.35E-06 | 1           | 6.31E-03 |
| phe.Fasting_rs150765570S7  | DIAPH1 | rs146815317 | S5  | KPNA3       | 2.97E-15 | 1.21E-07   | 8.14E-12 | 1.18E-13 | 4.80E-06    | 7.06E-10 |
| phe.Fasting_rs150765570S7  | DIAPH1 | rs150117838 | S8  | KPNA3       | 2.97E-15 | 1.21E-07   | 8.14E-12 | 1.09E-13 | 4.44E-06    | 6.79E-10 |
| phe.Fasting_rs150765570S7  | DIAPH1 | rs150916187 | S4  | HIST1H2BK   | 1.38E-05 | 1          | 6.05E-03 | 1.37E-14 | 5.59E-07    | 1.16E-10 |

|                           |        |            |     |             |          |             |          |          |             |          |
|---------------------------|--------|------------|-----|-------------|----------|-------------|----------|----------|-------------|----------|
| phe.Fasting_rs150765570S7 | DIAPH1 | rs16894241 | S4  | HIST1H2BK   | 1.99E-11 | 0.000812315 | 2.96E-08 | 3.44E-14 | 1.40E-06    | 2.50E-10 |
| phe.Fasting_rs150765570S7 | DIAPH1 | rs2032062  | S8  | NA          | 1.22E-14 | 4.98E-07    | 3.09E-11 | 8.48E-06 | 1           | 7.14E-03 |
| phe.Fasting_rs150765570S7 | DIAPH1 | rs2153597  | S8  | ZNF438      | 5.51E-11 | 0.00224928  | 7.42E-08 | 4.52E-09 | 0.183916    | 9.08E-06 |
| phe.Fasting_rs150765570S7 | DIAPH1 | rs2835656  | S7  | TTC3        | 3.01E-10 | 0.01222766  | 3.60E-07 | 9.12E-06 | 1           | 7.57E-03 |
| phe.Fasting_rs150765570S7 | DIAPH1 | rs34801978 | S3  | HOXB2       | 1.23E-05 | 1           | 5.46E-03 | 1.03E-08 | 0.419057    | 1.90E-05 |
| phe.Fasting_rs150765570S7 | DIAPH1 | rs352346   | S3  | GRPEL2      | 1.85E-11 | 0.000754995 | 2.78E-08 | 8.42E-06 | 1           | 7.10E-03 |
| phe.Fasting_rs150765570S7 | DIAPH1 | rs3750898  | S8  | DCLRE1A     | 2.29E-05 | 1           | 9.35E-03 | 8.76E-06 | 1           | 7.32E-03 |
| phe.Fasting_rs150765570S7 | DIAPH1 | rs4732511  | S13 | POR         | 2.30E-15 | 9.39E-08    | 6.48E-12 | 9.65E-06 | 1           | 7.93E-03 |
| phe.Fasting_rs150765570S7 | DIAPH1 | rs57503635 | S3  | NA          | 6.34E-16 | 2.59E-08    | 1.95E-12 | 3.17E-14 | 1.29E-06    | 2.34E-10 |
| phe.Fasting_rs150765570S7 | DIAPH1 | rs58905476 | S7  | TTC3        | 3.29E-10 | 0.0134302   | 3.90E-07 | 9.79E-06 | 1           | 8.01E-03 |
| phe.Fasting_rs150765570S7 | DIAPH1 | rs60011869 | S16 | NA          | 1.04E-05 | 1           | 4.72E-03 | 8.16E-10 | 0.0332257   | 1.98E-06 |
| phe.Fasting_rs150765570S7 | DIAPH1 | rs6964407  | S7  | POR         | 7.55E-15 | 3.08E-07    | 1.94E-11 | 8.91E-06 | 1           | 7.43E-03 |
| phe.Fasting_rs150765570S7 | DIAPH1 | rs7004597  | S8  | NA          | 4.51E-15 | 1.84E-07    | 1.18E-11 | 2.34E-07 | 1           | 3.04E-04 |
| phe.Fasting_rs150765570S7 | DIAPH1 | rs7256517  | S7  | CYTH2       | 1.04E-15 | 4.24E-08    | 3.06E-12 | 4.82E-12 | 0.000196022 | 1.91E-08 |
| phe.Fasting_rs150765570S7 | DIAPH1 | rs73283603 | S7  | ZWINT       | 1.90E-06 | 1           | 1.07E-03 | 2.03E-07 | 1           | 2.68E-04 |
| phe.Fasting_rs150765570S7 | DIAPH1 | rs73392640 | S8  | POLR3B      | 2.02E-10 | 0.00826001  | 2.49E-07 | 5.19E-11 | 0.00211214  | 1.67E-07 |
| phe.Fasting_rs150765570S7 | DIAPH1 | rs734069   | S19 | NA          | 2.06E-08 | 0.839421    | 1.81E-05 | 6.71E-10 | 0.0272994   | 1.68E-06 |
| phe.Fasting_rs150765570S7 | DIAPH1 | rs73619637 | S8  | NA          | 1.44E-15 | 5.89E-08    | 4.14E-12 | 2.05E-10 | 0.00833668  | 5.78E-07 |
| phe.Fasting_rs150765570S7 | DIAPH1 | rs74627895 | S8  | TMEM64      | 7.32E-07 | 1           | 4.60E-04 | 2.03E-08 | 0.828094    | 3.48E-05 |
| phe.Fasting_rs150765570S7 | DIAPH1 | rs74914207 | S24 | NA          | 1.37E-10 | 0.00558626  | 1.73E-07 | 9.12E-11 | 0.0037135   | 2.80E-07 |
| phe.Fasting_rs150765570S7 | DIAPH1 | rs75350765 | S5  | RCL1        | 1.82E-16 | 7.42E-09    | 6.37E-13 | 3.70E-08 | 1           | 5.84E-05 |
| phe.Fasting_rs150765570S7 | DIAPH1 | rs75374128 | S5  | CNTLN       | 1.47E-16 | 6.01E-09    | 5.72E-13 | 1.01E-07 | 1           | 1.42E-04 |
| phe.Fasting_rs150765570S7 | DIAPH1 | rs75506779 | S5  | TMCO3       | 5.55E-07 | 1           | 3.61E-04 | 1.10E-08 | 0.449707    | 2.03E-05 |
| phe.Fasting_rs150765570S7 | DIAPH1 | rs75758702 | S24 | NA          | 7.02E-17 | 2.87E-09    | 3.16E-13 | 1.57E-10 | 0.00638323  | 4.59E-07 |
| phe.Fasting_rs150765570S7 | DIAPH1 | rs75864203 | S8  | CNTLN       | 1.47E-16 | 6.01E-09    | 5.72E-13 | 1.01E-07 | 1           | 1.42E-04 |
| phe.Fasting_rs150765570S7 | DIAPH1 | rs75949566 | S5  | TMEM64      | 2.76E-06 | 1           | 1.47E-03 | 8.48E-11 | 0.00345267  | 2.62E-07 |
| phe.Fasting_rs150765570S7 | DIAPH1 | rs76844308 | S8  | CNTLN       | 7.68E-17 | 3.14E-09    | 3.41E-13 | 9.52E-08 | 1           | 1.35E-04 |
| phe.Fasting_rs150765570S7 | DIAPH1 | rs7763107  | S8  | FARS2       | 5.78E-16 | 2.36E-08    | 1.79E-12 | 9.23E-12 | 0.000375564 | 3.44E-08 |
| phe.Fasting_rs150765570S7 | DIAPH1 | rs77798597 | S7  | KPNA3       | 2.97E-15 | 1.21E-07    | 8.14E-12 | 1.09E-13 | 4.44E-06    | 6.79E-10 |
| phe.Fasting_rs150765570S7 | DIAPH1 | rs77845645 | S21 | NA          | 1.53E-06 | 1           | 8.88E-04 | 4.20E-11 | 0.00170882  | 1.38E-07 |
| phe.Fasting_rs150765570S7 | DIAPH1 | rs78353402 | S8  | AP3M2       | 4.51E-15 | 1.84E-07    | 1.18E-11 | 3.87E-07 | 1           | 4.75E-04 |
| phe.Fasting_rs150765570S7 | DIAPH1 | rs78516788 | S8  | SLC38A1     | 2.75E-11 | 0.00112269  | 3.94E-08 | 2.44E-10 | 0.00992686  | 6.74E-07 |
| phe.Fasting_rs150765570S7 | DIAPH1 | rs78697063 | S5  | MSI2        | 8.23E-19 | 3.36E-11    | 2.70E-14 | 6.84E-10 | 0.0278369   | 1.70E-06 |
| phe.Fasting_rs150765570S7 | DIAPH1 | rs78722272 | S5  | CNTLN       | 1.47E-16 | 6.01E-09    | 5.72E-13 | 1.05E-07 | 1           | 1.48E-04 |
| phe.Fasting_rs150765570S7 | DIAPH1 | rs78736524 | S5  | KPNA3       | 2.97E-15 | 1.21E-07    | 8.14E-12 | 1.18E-13 | 4.80E-06    | 7.06E-10 |
| phe.Fasting_rs150765570S7 | DIAPH1 | rs78990344 | S2  | LOC10050631 | 2.37E-06 | 1           | 1.30E-03 | 6.78E-11 | 0.00276161  | 2.13E-07 |
| phe.Fasting_rs150765570S7 | DIAPH1 | rs79781495 | S8  | KPNA3       | 2.97E-15 | 1.21E-07    | 8.14E-12 | 1.09E-13 | 4.44E-06    | 6.79E-10 |
| phe.Fasting_rs150765570S7 | DIAPH1 | rs79886603 | S15 | NA          | 8.71E-08 | 1           | 6.74E-05 | 4.66E-07 | 1           | 5.59E-04 |
| phe.Fasting_rs150765570S7 | DIAPH1 | rs80200953 | S8  | PPP2R5D     | 8.49E-17 | 3.47E-09    | 3.69E-13 | 3.65E-09 | 0.148399    | 7.55E-06 |
| phe.Fasting_rs150765570S7 | DIAPH1 | rs80332465 | S5  | KPNA3       | 3.13E-15 | 1.28E-07    | 8.51E-12 | 1.17E-13 | 4.77E-06    | 7.06E-10 |

|                            |                          |                |           |          |            |          |          |             |          |
|----------------------------|--------------------------|----------------|-----------|----------|------------|----------|----------|-------------|----------|
| phe.Fasting_rs150765570S7  | DIAPH1                   | rs80334773 S5  | KPNA3     | 3.13E-15 | 1.28E-07   | 8.51E-12 | 1.17E-13 | 4.77E-06    | 7.06E-10 |
| phe.Fasting_rs150916187S4  | HIST1H2BK                | rs114334325S7  | AP3M2     | 1.19E-16 | 4.86E-09   | 4.89E-13 | 4.44E-07 | 1           | 5.36E-04 |
| phe.Fasting_rs150916187S4  | HIST1H2BK                | rs114394395S7  | AP3M2     | 1.19E-16 | 4.86E-09   | 4.89E-13 | 4.44E-07 | 1           | 5.36E-04 |
| phe.Fasting_rs150916187S4  | HIST1H2BK                | rs114565620S8  | RCL1      | 9.38E-17 | 3.83E-09   | 4.04E-13 | 4.82E-16 | 1.96E-08    | 1.16E-11 |
| phe.Fasting_rs150916187S4  | HIST1H2BK                | rs115305957S23 | NA        | 6.22E-18 | 2.54E-10   | 7.57E-14 | 7.05E-07 | 1           | 8.21E-04 |
| phe.Fasting_rs150916187S4  | HIST1H2BK                | rs115787552S5  | KPNA3     | 2.90E-16 | 1.19E-08   | 9.67E-13 | 1.02E-11 | 0.000415894 | 3.78E-08 |
| phe.Fasting_rs150916187S4  | HIST1H2BK                | rs115888477S8  | NA        | 1.04E-15 | 4.26E-08   | 3.08E-12 | 2.83E-09 | 0.115258    | 6.02E-06 |
| phe.Fasting_rs150916187S4  | HIST1H2BK                | rs116011837S9  | BRD2      | 2.41E-18 | 9.85E-11   | 4.50E-14 | 1.77E-08 | 0.72033     | 3.08E-05 |
| phe.Fasting_rs150916187S4  | HIST1H2BK                | rs116079984S8  | KPNA3     | 2.90E-16 | 1.19E-08   | 9.67E-13 | 1.28E-11 | 0.000521901 | 4.69E-08 |
| phe.Fasting_rs150916187S4  | HIST1H2BK                | rs116120727S9  | BRD2      | 2.41E-18 | 9.85E-11   | 4.50E-14 | 1.77E-08 | 0.72033     | 3.08E-05 |
| phe.Fasting_rs150916187S4  | HIST1H2BK                | rs116406581S2  | NA        | 5.15E-16 | 2.10E-08   | 1.62E-12 | 3.08E-07 | 1           | 3.88E-04 |
| phe.Fasting_rs150916187S4  | HIST1H2BK                | rs116696844S3  | AP3M2     | 2.23E-16 | 9.11E-09   | 7.61E-13 | 4.44E-07 | 1           | 5.36E-04 |
| phe.Fasting_rs150916187S4  | HIST1H2BK                | rs140524622S7  | MRPL10    | 5.11E-18 | 2.09E-10   | 6.90E-14 | 1.24E-07 | 1           | 1.73E-04 |
| phe.Fasting_rs150916187S4  | HIST1H2BK                | rs141926074S8  | ATE1      | 3.84E-18 | 1.57E-10   | 5.85E-14 | 1.14E-05 | 1           | 9.06E-03 |
| phe.Fasting_rs150916187S4  | HIST1H2BK                | rs146815317S5  | KPNA3     | 2.90E-16 | 1.19E-08   | 9.67E-13 | 1.02E-11 | 0.000415894 | 3.78E-08 |
| phe.Fasting_rs150916187S4  | HIST1H2BK                | rs150117838S8  | KPNA3     | 2.90E-16 | 1.19E-08   | 9.67E-13 | 9.76E-12 | 0.000397184 | 3.62E-08 |
| phe.Fasting_rs150916187S4  | HIST1H2BK                | rs7004597 S8   | NA        | 1.19E-16 | 4.86E-09   | 4.89E-13 | 2.85E-07 | 1           | 3.62E-04 |
| phe.Fasting_rs150916187S4  | HIST1H2BK                | rs73619637 S8  | NA        | 4.29E-06 | 1          | 2.18E-03 | 1.05E-08 | 0.426866    | 1.93E-05 |
| phe.Fasting_rs150916187S4  | HIST1H2BK                | rs74701059 S24 | C17orf102 | 6.27E-18 | 2.56E-10   | 7.62E-14 | 7.93E-07 | 1           | 9.14E-04 |
| phe.Fasting_rs150916187S4  | HIST1H2BK                | rs75350765 S5  | RCL1      | 9.38E-17 | 3.83E-09   | 4.04E-13 | 4.82E-16 | 1.96E-08    | 1.16E-11 |
| phe.Fasting_rs150916187S4  | HIST1H2BK                | rs77798597 S7  | KPNA3     | 2.90E-16 | 1.19E-08   | 9.67E-13 | 9.76E-12 | 0.000397184 | 3.62E-08 |
| phe.Fasting_rs150916187S4  | HIST1H2BK                | rs78353402 S8  | AP3M2     | 1.19E-16 | 4.86E-09   | 4.89E-13 | 4.44E-07 | 1           | 5.36E-04 |
| phe.Fasting_rs150916187S4  | HIST1H2BK                | rs78736524 S5  | KPNA3     | 2.90E-16 | 1.19E-08   | 9.67E-13 | 1.02E-11 | 0.000415894 | 3.78E-08 |
| phe.Fasting_rs150916187S4  | HIST1H2BK                | rs79703349 S24 | C17orf102 | 6.27E-18 | 2.56E-10   | 7.62E-14 | 9.92E-07 | 1           | 1.12E-03 |
| phe.Fasting_rs150916187S4  | HIST1H2BK                | rs79781495 S8  | KPNA3     | 2.90E-16 | 1.19E-08   | 9.67E-13 | 9.76E-12 | 0.000397184 | 3.62E-08 |
| phe.Fasting_rs150916187S4  | HIST1H2BK                | rs80332465 S5  | KPNA3     | 3.13E-16 | 1.28E-08   | 1.04E-12 | 1.03E-11 | 0.000421273 | 3.83E-08 |
| phe.Fasting_rs150916187S4  | HIST1H2BK                | rs80334773 S5  | KPNA3     | 3.13E-16 | 1.28E-08   | 1.04E-12 | 1.03E-11 | 0.000421273 | 3.83E-08 |
| phe.Fasting_rs150992994S11 | "PCDHGA5,Prs111576333S5  |                | TMEM64    | 2.49E-06 | 1.00E+00   | 1.35E-03 | 5.77E-14 | 2.35E-06    | 3.96E-10 |
| phe.Fasting_rs150992994S11 | "PCDHGA5,Prs112089881S8  |                | ZFAND4    | 2.12E-17 | 8.66E-10   | 1.43E-13 | 9.69E-10 | 0.0394568   | 2.30E-06 |
| phe.Fasting_rs150992994S11 | "PCDHGA5,Prs112091318S5  |                | TMEM64    | 7.71E-07 | 1.00E+00   | 4.81E-04 | 3.78E-08 | 1           | 5.95E-05 |
| phe.Fasting_rs150992994S11 | "PCDHGA5,Prs114334325S7  |                | AP3M2     | 4.86E-15 | 1.98E-07   | 1.27E-11 | 1.27E-05 | 1           | 9.82E-03 |
| phe.Fasting_rs150992994S11 | "PCDHGA5,Prs114394395S7  |                | AP3M2     | 5.19E-15 | 2.12E-07   | 1.35E-11 | 1.27E-05 | 1           | 9.82E-03 |
| phe.Fasting_rs150992994S11 | "PCDHGA5,Prs114565620S8  |                | RCL1      | 1.86E-16 | 7.60E-09   | 6.51E-13 | 3.54E-08 | 1           | 5.62E-05 |
| phe.Fasting_rs150992994S11 | "PCDHGA5,Prs115083290S19 |                | NA        | 4.46E-16 | 1.82E-08   | 1.43E-12 | 1.26E-08 | 0.514031    | 2.29E-05 |
| phe.Fasting_rs150992994S11 | "PCDHGA5,Prs115752779S19 |                | NA        | 4.46E-16 | 1.82E-08   | 1.43E-12 | 1.26E-08 | 0.514031    | 2.29E-05 |
| phe.Fasting_rs150992994S11 | "PCDHGA5,Prs115787552S5  |                | KPNA3     | 3.03E-15 | 1.24E-07   | 8.30E-12 | 1.11E-13 | 4.53E-06    | 6.88E-10 |
| phe.Fasting_rs150992994S11 | "PCDHGA5,Prs115888477S8  |                | NA        | 2.06E-14 | 8.42E-07   | 5.10E-11 | 2.09E-14 | 8.49E-07    | 1.66E-10 |
| phe.Fasting_rs150992994S11 | "PCDHGA5,Prs116011837S9  |                | BRD2      | 5.03E-11 | 0.00205601 | 6.81E-08 | 3.85E-14 | 1.57E-06    | 2.76E-10 |
| phe.Fasting_rs150992994S11 | "PCDHGA5,Prs116079984S8  |                | KPNA3     | 3.03E-15 | 1.24E-07   | 8.30E-12 | 1.16E-13 | 4.73E-06    | 7.06E-10 |
| phe.Fasting_rs150992994S11 | "PCDHGA5,Prs116120727S9  |                | BRD2      | 5.03E-11 | 0.00205601 | 6.81E-08 | 3.85E-14 | 1.57E-06    | 2.76E-10 |

|                             |                          |           |          |             |            |          |             |          |
|-----------------------------|--------------------------|-----------|----------|-------------|------------|----------|-------------|----------|
| phe.Fasting_rs150992994 S11 | "PCDHGA5,Prs116406581 S2 | NA        | 1.96E-14 | 7.99E-07    | 4.87E-11   | 7.76E-06 | 1           | 6.60E-03 |
| phe.Fasting_rs150992994 S11 | "PCDHGA5,Prs116548615 S8 | TMEM45B   | 1.86E-16 | 7.59E-09    | 6.50E-13   | 2.35E-11 | 0.000956989 | 8.18E-08 |
| phe.Fasting_rs150992994 S11 | "PCDHGA5,Prs116696844 S3 | AP3M2     | 7.46E-15 | 3.05E-07    | 1.92E-11   | 1.27E-05 | 1           | 9.82E-03 |
| phe.Fasting_rs150992994 S11 | "PCDHGA5,Prs11989304 S4  | TMEM64    | 2.49E-06 | 1           | 1.35E-03   | 6.52E-11 | 0.00265263  | 2.06E-07 |
| phe.Fasting_rs150992994 S11 | "PCDHGA5,Prs140524622 S7 | MRPL10    | 1.12E-16 | 4.56E-09    | 4.69E-13   | 6.56E-06 | 1           | 5.74E-03 |
| phe.Fasting_rs150992994 S11 | "PCDHGA5,Prs146815317 S5 | KPNA3     | 3.03E-15 | 1.24E-07    | 8.30E-12   | 1.11E-13 | 4.53E-06    | 6.88E-10 |
| phe.Fasting_rs150992994 S11 | "PCDHGA5,Prs150117838 S8 | KPNA3     | 3.03E-15 | 1.24E-07    | 8.30E-12   | 1.03E-13 | 4.19E-06    | 6.54E-10 |
| phe.Fasting_rs150992994 S11 | "PCDHGA5,Prs150916187 S4 | HIST1H2BK | 1.41E-05 | 1           | 6.16E-03   | 1.32E-14 | 5.38E-07    | 1.13E-10 |
| phe.Fasting_rs150992994 S11 | "PCDHGA5,Prs16894241 S4  | HIST1H2BK | 2.02E-11 | 0.000826881 | 3.01E-08   | 3.27E-14 | 1.33E-06    | 2.40E-10 |
| phe.Fasting_rs150992994 S11 | "PCDHGA5,Prs2000418 S7   | TTC3      | 3.25E-10 | 0.0132901   | 3.87E-07   | 1.25E-05 | 1           | 9.69E-03 |
| phe.Fasting_rs150992994 S11 | "PCDHGA5,Prs2032062 S8   | NA        | 1.16E-14 | 4.72E-07    | 2.94E-11   | 1.46E-06 | 1           | 1.58E-03 |
| phe.Fasting_rs150992994 S11 | "PCDHGA5,Prs2153597 S8   | ZNF438    | 5.56E-11 | 2.27E-03    | 7.48E-08   | 4.15E-11 | 0.00168769  | 1.37E-07 |
| phe.Fasting_rs150992994 S11 | "PCDHGA5,Prs2257163 S7   | TTC3      | 2.88E-10 | 1.18E-02    | 3.47E-07   | 1.26E-05 | 1           | 9.75E-03 |
| phe.Fasting_rs150992994 S11 | "PCDHGA5,Prs2298326 S7   | TTC3      | 3.82E-10 | 1.56E-02    | 4.45E-07   | 1.26E-05 | 1           | 9.75E-03 |
| phe.Fasting_rs150992994 S11 | "PCDHGA5,Prs2835632 S7   | TTC3      | 2.88E-10 | 1.18E-02    | 3.47E-07   | 1.26E-05 | 1           | 9.75E-03 |
| phe.Fasting_rs150992994 S11 | "PCDHGA5,Prs2835656 S7   | TTC3      | 2.85E-10 | 1.16E-02    | 3.43E-07   | 1.59E-06 | 1           | 1.69E-03 |
| phe.Fasting_rs150992994 S11 | "PCDHGA5,Prs34801978 S3  | HOXB2     | 1.23E-05 | 1.00E+00    | 5.46E-03   | 3.93E-07 | 1           | 4.81E-04 |
| phe.Fasting_rs150992994 S11 | "PCDHGA5,Prs352346 S3    | GRPEL2    | 1.90E-11 | 7.76E-04    | 2.84E-08   | 1.60E-06 | 1           | 1.71E-03 |
| phe.Fasting_rs150992994 S11 | "PCDHGA5,Prs3750898 S8   | DCLRE1A   | 2.29E-05 | 1.00E+00    | 9.35E-03   | 9.05E-07 | 1           | 1.03E-03 |
| phe.Fasting_rs150992994 S11 | "PCDHGA5,Prs4732511 S13  | POR       | 2.53E-15 | 1.03E-07    | 7.12E-12   | 1.08E-05 | 1           | 8.75E-03 |
| phe.Fasting_rs150992994 S11 | "PCDHGA5,Prs57503635 S3  | NA        | 6.55E-16 | 2.68E-08    | 2.01E-12   | 3.12E-14 | 1.27E-06    | 2.32E-10 |
| phe.Fasting_rs150992994 S11 | "PCDHGA5,Prs58905476 S7  | TTC3      | 3.15E-10 | 0.0128695   | 3.75E-07   | 1.70E-06 | 1           | 1.80E-03 |
| phe.Fasting_rs150992994 S11 | "PCDHGA5,Prs60011869 S16 | NA        | 1.06E-05 | 1           | 0.00483349 | 7.67E-10 | 0.0312392   | 1.89E-06 |
| phe.Fasting_rs150992994 S11 | "PCDHGA5,Prs6964407 S7   | POR       | 8.28E-15 | 3.38E-07    | 2.12E-11   | 1.00E-05 | 1           | 8.17E-03 |
| phe.Fasting_rs150992994 S11 | "PCDHGA5,Prs7004597 S8   | NA        | 4.86E-15 | 1.98E-07    | 1.27E-11   | 7.88E-06 | 1           | 6.69E-03 |
| phe.Fasting_rs150992994 S11 | "PCDHGA5,Prs7256517 S7   | CYTH2     | 1.08E-15 | 4.40E-08    | 3.17E-12   | 4.57E-12 | 0.000185844 | 1.82E-08 |
| phe.Fasting_rs150992994 S11 | "PCDHGA5,Prs7275757 S7   | TTC3      | 3.15E-10 | 0.0128695   | 3.75E-07   | 1.23E-05 | 1           | 9.59E-03 |
| phe.Fasting_rs150992994 S11 | "PCDHGA5,Prs7284020 S7   | TTC3      | 4.15E-10 | 0.0169598   | 4.82E-07   | 1.21E-05 | 1           | 9.49E-03 |
| phe.Fasting_rs150992994 S11 | "PCDHGA5,Prs73283603 S7  | ZWINT     | 2.00E-06 | 1           | 1.12E-03   | 1.85E-07 | 1           | 2.47E-04 |
| phe.Fasting_rs150992994 S11 | "PCDHGA5,Prs73391005 S8  | TTC3      | 3.25E-10 | 0.0132901   | 3.87E-07   | 1.26E-05 | 1           | 9.75E-03 |
| phe.Fasting_rs150992994 S11 | "PCDHGA5,Prs73391173 S8  | TTC3      | 3.25E-10 | 0.0132901   | 3.87E-07   | 1.25E-05 | 1           | 9.69E-03 |
| phe.Fasting_rs150992994 S11 | "PCDHGA5,Prs73392640 S8  | POLR3B    | 2.01E-10 | 0.00822221  | 2.48E-07   | 4.86E-11 | 0.00197665  | 1.57E-07 |
| phe.Fasting_rs150992994 S11 | "PCDHGA5,Prs734069 S19   | NA        | 1.96E-08 | 0.80176     | 1.74E-05   | 5.86E-10 | 0.0238667   | 1.48E-06 |
| phe.Fasting_rs150992994 S11 | "PCDHGA5,Prs73407968 S8  | TTC3      | 3.86E-10 | 0.0157602   | 4.50E-07   | 1.27E-05 | 1           | 9.80E-03 |
| phe.Fasting_rs150992994 S11 | "PCDHGA5,Prs73619637 S8  | NA        | 1.47E-15 | 6.01E-08    | 4.22E-12   | 1.84E-10 | 0.00749129  | 5.27E-07 |
| phe.Fasting_rs150992994 S11 | "PCDHGA5,Prs74627895 S8  | TMEM64    | 7.71E-07 | 1           | 4.81E-04   | 1.96E-08 | 0.799278    | 3.37E-05 |
| phe.Fasting_rs150992994 S11 | "PCDHGA5,Prs74914207 S24 | NA        | 1.47E-10 | 0.00599338  | 1.85E-07   | 1.91E-10 | 0.00776557  | 5.44E-07 |
| phe.Fasting_rs150992994 S11 | "PCDHGA5,Prs75350765 S5  | RCL1      | 1.86E-16 | 7.60E-09    | 6.51E-13   | 3.54E-08 | 1           | 5.62E-05 |
| phe.Fasting_rs150992994 S11 | "PCDHGA5,Prs75374128 S5  | CNTLN     | 1.51E-16 | 6.17E-09    | 5.83E-13   | 9.75E-08 | 1           | 1.38E-04 |
| phe.Fasting_rs150992994 S11 | "PCDHGA5,Prs75506779 S5  | TMCO3     | 5.54E-07 | 1           | 3.60E-04   | 1.06E-08 | 0.432784    | 1.96E-05 |

|              |             |     |                      |             |            |           |            |            |          |             |             |          |
|--------------|-------------|-----|----------------------|-------------|------------|-----------|------------|------------|----------|-------------|-------------|----------|
| phe.Fasting_ | rs150992994 | S11 | "PCDHGA5,Prs75758702 | S24         | NA         | 7.20E-17  | 2.94E-09   | 3.23E-13   | 1.53E-10 | 0.00623178  | 4.53E-07    |          |
| phe.Fasting_ | rs150992994 | S11 | "PCDHGA5,Prs75864203 | S8          | CNTLN      | 1.51E-16  | 6.17E-09   | 5.83E-13   | 9.75E-08 | 1           | 1.38E-04    |          |
| phe.Fasting_ | rs150992994 | S11 | "PCDHGA5,Prs75949566 | S5          | TMEM64     | 2.90E-06  | 1          | 1.53E-03   | 8.13E-11 | 0.00330767  | 2.53E-07    |          |
| phe.Fasting_ | rs150992994 | S11 | "PCDHGA5,Prs76844308 | S8          | CNTLN      | 7.92E-17  | 3.24E-09   | 3.50E-13   | 9.09E-08 | 1           | 1.30E-04    |          |
| phe.Fasting_ | rs150992994 | S11 | "PCDHGA5,Prs7763107  | S8          | FARS2      | 5.93E-16  | 2.42E-08   | 1.84E-12   | 8.70E-12 | 0.000354061 | 3.26E-08    |          |
| phe.Fasting_ | rs150992994 | S11 | "PCDHGA5,Prs77798597 | S7          | KPNA3      | 3.03E-15  | 1.24E-07   | 8.30E-12   | 1.03E-13 | 4.19E-06    | 6.54E-10    |          |
| phe.Fasting_ | rs150992994 | S11 | "PCDHGA5,Prs77845645 | S21         | NA         | 1.60E-06  | 1          | 9.20E-04   | 4.00E-11 | 0.00163008  | 1.32E-07    |          |
| phe.Fasting_ | rs150992994 | S11 | "PCDHGA5,Prs78353402 | S8          | AP3M2      | 4.86E-15  | 1.98E-07   | 1.27E-11   | 1.27E-05 | 1           | 9.82E-03    |          |
| phe.Fasting_ | rs150992994 | S11 | "PCDHGA5,Prs78516788 | S8          | SLC38A1    | 2.69E-11  | 0.00109941 | 3.87E-08   | 2.31E-10 | 0.00941253  | 6.43E-07    |          |
| phe.Fasting_ | rs150992994 | S11 | "PCDHGA5,Prs78697063 | S5          | MSI2       | 8.23E-19  | 3.36E-11   | 2.70E-14   | 6.28E-10 | 0.0255471   | 1.58E-06    |          |
| phe.Fasting_ | rs150992994 | S11 | "PCDHGA5,Prs78722272 | S5          | CNTLN      | 1.51E-16  | 6.17E-09   | 5.83E-13   | 1.02E-07 | 1           | 1.43E-04    |          |
| phe.Fasting_ | rs150992994 | S11 | "PCDHGA5,Prs78736524 | S5          | KPNA3      | 3.03E-15  | 1.24E-07   | 8.30E-12   | 1.11E-13 | 4.53E-06    | 6.88E-10    |          |
| phe.Fasting_ | rs150992994 | S11 | "PCDHGA5,Prs78990344 | S2          | LOC1005063 | 2.49E-06  | 1          | 1.35E-03   | 6.52E-11 | 0.00265263  | 2.06E-07    |          |
| phe.Fasting_ | rs150992994 | S11 | "PCDHGA5,Prs79781495 | S8          | KPNA3      | 3.03E-15  | 1.24E-07   | 8.30E-12   | 1.03E-13 | 4.19E-06    | 6.54E-10    |          |
| phe.Fasting_ | rs150992994 | S11 | "PCDHGA5,Prs80200953 | S8          | PPP2R5D    | 8.66E-17  | 3.54E-09   | 3.76E-13   | 3.42E-09 | 0.139361    | 7.15E-06    |          |
| phe.Fasting_ | rs150992994 | S11 | "PCDHGA5,Prs80332465 | S5          | KPNA3      | 3.20E-15  | 1.31E-07   | 8.70E-12   | 1.11E-13 | 4.51E-06    | 6.85E-10    |          |
| phe.Fasting_ | rs150992994 | S11 | "PCDHGA5,Prs80334773 | S5          | KPNA3      | 3.20E-15  | 1.31E-07   | 8.70E-12   | 1.11E-13 | 4.51E-06    | 6.85E-10    |          |
| phe.Fasting_ | rs150992994 | S11 | "PCDHGA5,Prs891061   | S7          | POP4       | 1.05E-07  | 1          | 7.94E-05   | 3.01E-06 | 1           | 2.94E-03    |          |
| phe.Fasting_ | rs151204700 | S8  | DIAPH1               | rs111576333 | S5         | TMEM64    | 2.37E-06   | 1.00E+00   | 1.30E-03 | 5.87E-14    | 2.39E-06    | 3.99E-10 |
| phe.Fasting_ | rs151204700 | S8  | DIAPH1               | rs112089881 | S8         | ZFAND4    | 2.04E-17   | 8.32E-10   | 1.43E-13 | 1.09E-09    | 0.0445256   | 2.58E-06 |
| phe.Fasting_ | rs151204700 | S8  | DIAPH1               | rs112091318 | S5         | TMEM64    | 7.32E-07   | 1.00E+00   | 4.60E-04 | 3.91E-08    | 1           | 6.13E-05 |
| phe.Fasting_ | rs151204700 | S8  | DIAPH1               | rs114334325 | S7         | AP3M2     | 4.51E-15   | 1.84E-07   | 1.18E-11 | 3.87E-07    | 1           | 4.75E-04 |
| phe.Fasting_ | rs151204700 | S8  | DIAPH1               | rs114394395 | S7         | AP3M2     | 4.81E-15   | 1.97E-07   | 1.25E-11 | 3.87E-07    | 1           | 4.75E-04 |
| phe.Fasting_ | rs151204700 | S8  | DIAPH1               | rs114565620 | S8         | RCL1      | 1.82E-16   | 7.42E-09   | 6.37E-13 | 3.70E-08    | 1           | 5.84E-05 |
| phe.Fasting_ | rs151204700 | S8  | DIAPH1               | rs115083290 | S19        | NA        | 4.38E-16   | 1.79E-08   | 1.40E-12 | 1.42E-08    | 0.576679    | 2.53E-05 |
| phe.Fasting_ | rs151204700 | S8  | DIAPH1               | rs11524145  | S5         | CDK6      | 7.80E-07   | 1.00E+00   | 4.86E-04 | 7.89E-06    | 1           | 6.69E-03 |
| phe.Fasting_ | rs151204700 | S8  | DIAPH1               | rs115752779 | S19        | NA        | 4.38E-16   | 1.79E-08   | 1.40E-12 | 1.42E-08    | 0.576679    | 2.53E-05 |
| phe.Fasting_ | rs151204700 | S8  | DIAPH1               | rs115787552 | S5         | KPNA3     | 2.97E-15   | 1.21E-07   | 8.14E-12 | 1.18E-13    | 4.80E-06    | 7.06E-10 |
| phe.Fasting_ | rs151204700 | S8  | DIAPH1               | rs115888477 | S8         | NA        | 2.03E-14   | 8.28E-07   | 5.02E-11 | 2.21E-14    | 8.99E-07    | 1.73E-10 |
| phe.Fasting_ | rs151204700 | S8  | DIAPH1               | rs116011837 | S9         | BRD2      | 4.89E-11   | 2.00E-03   | 6.62E-08 | 4.07E-14    | 1.66E-06    | 2.85E-10 |
| phe.Fasting_ | rs151204700 | S8  | DIAPH1               | rs116079984 | S8         | KPNA3     | 2.97E-15   | 1.21E-07   | 8.14E-12 | 1.24E-13    | 5.04E-06    | 7.34E-10 |
| phe.Fasting_ | rs151204700 | S8  | DIAPH1               | rs116120727 | S9         | BRD2      | 4.89E-11   | 0.00199774 | 6.62E-08 | 4.07E-14    | 1.66E-06    | 2.85E-10 |
| phe.Fasting_ | rs151204700 | S8  | DIAPH1               | rs116406581 | S2         | NA        | 1.81E-14   | 7.39E-07   | 4.52E-11 | 2.35E-07    | 1           | 3.05E-04 |
| phe.Fasting_ | rs151204700 | S8  | DIAPH1               | rs116548615 | S8         | TMEM45B   | 1.73E-16   | 7.06E-09   | 6.15E-13 | 8.70E-12    | 0.000354153 | 3.26E-08 |
| phe.Fasting_ | rs151204700 | S8  | DIAPH1               | rs116696844 | S3         | AP3M2     | 6.92E-15   | 2.83E-07   | 1.78E-11 | 3.87E-07    | 1           | 4.75E-04 |
| phe.Fasting_ | rs151204700 | S8  | DIAPH1               | rs11989304  | S4         | TMEM64    | 2.37E-06   | 1.00E+00   | 1.30E-03 | 6.78E-11    | 0.00276161  | 2.13E-07 |
| phe.Fasting_ | rs151204700 | S8  | DIAPH1               | rs140524622 | S7         | MRPL10    | 1.08E-16   | 4.41E-09   | 4.54E-13 | 7.35E-06    | 1           | 6.31E-03 |
| phe.Fasting_ | rs151204700 | S8  | DIAPH1               | rs146815317 | S5         | KPNA3     | 2.97E-15   | 1.21E-07   | 8.14E-12 | 1.18E-13    | 4.80E-06    | 7.06E-10 |
| phe.Fasting_ | rs151204700 | S8  | DIAPH1               | rs150117838 | S8         | KPNA3     | 2.97E-15   | 1.21E-07   | 8.14E-12 | 1.09E-13    | 4.44E-06    | 6.79E-10 |
| phe.Fasting_ | rs151204700 | S8  | DIAPH1               | rs150916187 | S4         | HIST1H2BK | 1.38E-05   | 1          | 6.05E-03 | 1.37E-14    | 5.59E-07    | 1.16E-10 |



|                           |        |            |     |             |          |             |             |          |             |          |
|---------------------------|--------|------------|-----|-------------|----------|-------------|-------------|----------|-------------|----------|
| phe.Fasting_rs151204700S8 | DIAPH1 | rs16894241 | S4  | HIST1H2BK   | 1.99E-11 | 0.000812315 | 2.96E-08    | 3.44E-14 | 1.40E-06    | 2.50E-10 |
| phe.Fasting_rs151204700S8 | DIAPH1 | rs2032062  | S8  | NA          | 1.22E-14 | 4.98E-07    | 3.09E-11    | 8.48E-06 | 1           | 7.14E-03 |
| phe.Fasting_rs151204700S8 | DIAPH1 | rs2153597  | S8  | ZNF438      | 5.51E-11 | 2.25E-03    | 7.42E-08    | 4.52E-09 | 0.183916    | 9.08E-06 |
| phe.Fasting_rs151204700S8 | DIAPH1 | rs2835656  | S7  | TTC3        | 3.01E-10 | 1.23E-02    | 3.60E-07    | 9.12E-06 | 1           | 7.57E-03 |
| phe.Fasting_rs151204700S8 | DIAPH1 | rs34801978 | S3  | HOXB2       | 1.23E-05 | 1.00E+00    | 5.46E-03    | 1.03E-08 | 0.419057    | 1.90E-05 |
| phe.Fasting_rs151204700S8 | DIAPH1 | rs352346   | S3  | GRPEL2      | 1.85E-11 | 0.000754995 | 2.78E-08    | 8.42E-06 | 1           | 7.10E-03 |
| phe.Fasting_rs151204700S8 | DIAPH1 | rs3750898  | S8  | DCLRE1A     | 2.29E-05 | 1           | 0.0093502   | 8.76E-06 | 1           | 7.32E-03 |
| phe.Fasting_rs151204700S8 | DIAPH1 | rs4732511  | S13 | POR         | 2.30E-15 | 9.39E-08    | 6.48E-12    | 9.65E-06 | 1           | 7.93E-03 |
| phe.Fasting_rs151204700S8 | DIAPH1 | rs57503635 | S3  | NA          | 6.34E-16 | 2.59E-08    | 1.95E-12    | 3.17E-14 | 1.29E-06    | 2.34E-10 |
| phe.Fasting_rs151204700S8 | DIAPH1 | rs58905476 | S7  | TTC3        | 3.29E-10 | 1.34E-02    | 3.90E-07    | 9.79E-06 | 1           | 8.01E-03 |
| phe.Fasting_rs151204700S8 | DIAPH1 | rs60011869 | S16 | NA          | 1.04E-05 | 1.00E+00    | 4.72E-03    | 8.16E-10 | 0.0332257   | 1.98E-06 |
| phe.Fasting_rs151204700S8 | DIAPH1 | rs6964407  | S7  | POR         | 7.55E-15 | 3.08E-07    | 1.94E-11    | 8.91E-06 | 1           | 7.43E-03 |
| phe.Fasting_rs151204700S8 | DIAPH1 | rs7004597  | S8  | NA          | 4.51E-15 | 1.84E-07    | 1.18E-11    | 2.34E-07 | 1           | 3.04E-04 |
| phe.Fasting_rs151204700S8 | DIAPH1 | rs7256517  | S7  | CYTH2       | 1.04E-15 | 4.24E-08    | 3.06E-12    | 4.82E-12 | 0.000196022 | 1.91E-08 |
| phe.Fasting_rs151204700S8 | DIAPH1 | rs73283603 | S7  | ZWINT       | 1.90E-06 | 1.00E+00    | 1.07E-03    | 2.03E-07 | 1           | 2.68E-04 |
| phe.Fasting_rs151204700S8 | DIAPH1 | rs73392640 | S8  | POLR3B      | 2.02E-10 | 0.00826001  | 2.49E-07    | 5.19E-11 | 0.00211214  | 1.67E-07 |
| phe.Fasting_rs151204700S8 | DIAPH1 | rs734069   | S19 | NA          | 2.06E-08 | 0.839421    | 1.81E-05    | 6.71E-10 | 0.0272994   | 1.68E-06 |
| phe.Fasting_rs151204700S8 | DIAPH1 | rs73619637 | S8  | NA          | 1.44E-15 | 5.89E-08    | 4.14E-12    | 2.05E-10 | 0.00833668  | 5.78E-07 |
| phe.Fasting_rs151204700S8 | DIAPH1 | rs74627895 | S8  | TMEM64      | 7.32E-07 | 1           | 0.000459899 | 2.03E-08 | 0.828094    | 3.48E-05 |
| phe.Fasting_rs151204700S8 | DIAPH1 | rs74914207 | S24 | NA          | 1.37E-10 | 5.59E-03    | 1.73E-07    | 9.12E-11 | 0.0037135   | 2.80E-07 |
| phe.Fasting_rs151204700S8 | DIAPH1 | rs75350765 | S5  | RCL1        | 1.82E-16 | 7.42E-09    | 6.37E-13    | 3.70E-08 | 1           | 5.84E-05 |
| phe.Fasting_rs151204700S8 | DIAPH1 | rs75374128 | S5  | CNTLN       | 1.47E-16 | 6.01E-09    | 5.72E-13    | 1.01E-07 | 1           | 1.42E-04 |
| phe.Fasting_rs151204700S8 | DIAPH1 | rs75506779 | S5  | TMCO3       | 5.55E-07 | 1.00E+00    | 3.61E-04    | 1.10E-08 | 0.449707    | 2.03E-05 |
| phe.Fasting_rs151204700S8 | DIAPH1 | rs75758702 | S24 | NA          | 7.02E-17 | 2.87E-09    | 3.16E-13    | 1.57E-10 | 0.00638323  | 4.59E-07 |
| phe.Fasting_rs151204700S8 | DIAPH1 | rs75864203 | S8  | CNTLN       | 1.47E-16 | 6.01E-09    | 5.72E-13    | 1.01E-07 | 1           | 1.42E-04 |
| phe.Fasting_rs151204700S8 | DIAPH1 | rs75949566 | S5  | TMEM64      | 2.76E-06 | 1.00E+00    | 1.47E-03    | 8.48E-11 | 0.00345267  | 2.62E-07 |
| phe.Fasting_rs151204700S8 | DIAPH1 | rs76844308 | S8  | CNTLN       | 7.68E-17 | 3.14E-09    | 3.41E-13    | 9.52E-08 | 1           | 1.35E-04 |
| phe.Fasting_rs151204700S8 | DIAPH1 | rs7763107  | S8  | FARS2       | 5.78E-16 | 2.36E-08    | 1.79E-12    | 9.23E-12 | 0.000375564 | 3.44E-08 |
| phe.Fasting_rs151204700S8 | DIAPH1 | rs77798597 | S7  | KPNA3       | 2.97E-15 | 1.21E-07    | 8.14E-12    | 1.09E-13 | 4.44E-06    | 6.79E-10 |
| phe.Fasting_rs151204700S8 | DIAPH1 | rs77845645 | S21 | NA          | 1.53E-06 | 1.00E+00    | 8.88E-04    | 4.20E-11 | 0.00170882  | 1.38E-07 |
| phe.Fasting_rs151204700S8 | DIAPH1 | rs78353402 | S8  | AP3M2       | 4.51E-15 | 1.84E-07    | 1.18E-11    | 3.87E-07 | 1           | 4.75E-04 |
| phe.Fasting_rs151204700S8 | DIAPH1 | rs78516788 | S8  | SLC38A1     | 2.75E-11 | 1.12E-03    | 3.94E-08    | 2.44E-10 | 0.00992686  | 6.74E-07 |
| phe.Fasting_rs151204700S8 | DIAPH1 | rs78697063 | S5  | MSI2        | 8.23E-19 | 3.36E-11    | 2.70E-14    | 6.84E-10 | 0.0278369   | 1.70E-06 |
| phe.Fasting_rs151204700S8 | DIAPH1 | rs78722272 | S5  | CNTLN       | 1.47E-16 | 6.01E-09    | 5.72E-13    | 1.05E-07 | 1           | 1.48E-04 |
| phe.Fasting_rs151204700S8 | DIAPH1 | rs78736524 | S5  | KPNA3       | 2.97E-15 | 1.21E-07    | 8.14E-12    | 1.18E-13 | 4.80E-06    | 7.06E-10 |
| phe.Fasting_rs151204700S8 | DIAPH1 | rs78990344 | S2  | LOC10050631 | 2.37E-06 | 1           | 1.30E-03    | 6.78E-11 | 0.00276161  | 2.13E-07 |
| phe.Fasting_rs151204700S8 | DIAPH1 | rs79781495 | S8  | KPNA3       | 2.97E-15 | 1.21E-07    | 8.14E-12    | 1.09E-13 | 4.44E-06    | 6.79E-10 |
| phe.Fasting_rs151204700S8 | DIAPH1 | rs79886603 | S15 | NA          | 8.71E-08 | 1           | 6.74E-05    | 4.66E-07 | 1           | 5.59E-04 |
| phe.Fasting_rs151204700S8 | DIAPH1 | rs80200953 | S8  | PPP2R5D     | 8.49E-17 | 3.47E-09    | 3.69E-13    | 3.65E-09 | 0.148399    | 7.55E-06 |
| phe.Fasting_rs151204700S8 | DIAPH1 | rs80332465 | S5  | KPNA3       | 3.13E-15 | 1.28E-07    | 8.51E-12    | 1.17E-13 | 4.77E-06    | 7.06E-10 |

|                           |        |                |           |          |             |             |          |             |          |
|---------------------------|--------|----------------|-----------|----------|-------------|-------------|----------|-------------|----------|
| phe.Fasting_rs151204700S8 | DIAPH1 | rs80334773 S5  | KPNA3     | 3.13E-15 | 1.28E-07    | 8.51E-12    | 1.17E-13 | 4.77E-06    | 7.06E-10 |
| phe.Fasting_rs151330468S8 | DIAPH1 | rs111576333S5  | TMEM64    | 5.56E-07 | 1           | 3.61E-04    | 8.30E-15 | 3.38E-07    | 7.30E-11 |
| phe.Fasting_rs151330468S8 | DIAPH1 | rs112089881S8  | ZFAND4    | 3.24E-18 | 1.32E-10    | 5.45E-14    | 2.00E-10 | 0.0081353   | 5.68E-07 |
| phe.Fasting_rs151330468S8 | DIAPH1 | rs112091318S5  | TMEM64    | 1.64E-07 | 1           | 1.18E-04    | 9.23E-09 | 0.375672    | 1.74E-05 |
| phe.Fasting_rs151330468S8 | DIAPH1 | rs114334325S7  | AP3M2     | 1.25E-15 | 5.12E-08    | 3.65E-12    | 9.18E-08 | 1           | 1.31E-04 |
| phe.Fasting_rs151330468S8 | DIAPH1 | rs114394395S7  | AP3M2     | 1.33E-15 | 5.44E-08    | 3.85E-12    | 9.18E-08 | 1           | 1.31E-04 |
| phe.Fasting_rs151330468S8 | DIAPH1 | rs114565620S8  | RCL1      | 2.03E-17 | 8.30E-10    | 1.43E-13    | 8.22E-09 | 0.334664    | 1.57E-05 |
| phe.Fasting_rs151330468S8 | DIAPH1 | rs115083290S19 | NA        | 8.17E-17 | 3.34E-09    | 3.58E-13    | 2.95E-09 | 0.120139    | 6.26E-06 |
| phe.Fasting_rs151330468S8 | DIAPH1 | rs115752779S19 | NA        | 8.17E-17 | 3.34E-09    | 3.58E-13    | 2.95E-09 | 0.120139    | 6.26E-06 |
| phe.Fasting_rs151330468S8 | DIAPH1 | rs115787552S5  | KPNA3     | 5.05E-16 | 2.06E-08    | 1.59E-12    | 2.49E-14 | 1.01E-06    | 1.89E-10 |
| phe.Fasting_rs151330468S8 | DIAPH1 | rs115888477S8  | NA        | 3.68E-15 | 1.50E-07    | 9.90E-12    | 4.39E-15 | 1.79E-07    | 4.08E-11 |
| phe.Fasting_rs151330468S8 | DIAPH1 | rs116011837S9  | BRD2      | 9.60E-12 | 0.000392176 | 1.53E-08    | 9.42E-15 | 3.84E-07    | 8.18E-11 |
| phe.Fasting_rs151330468S8 | DIAPH1 | rs116079984S8  | KPNA3     | 5.05E-16 | 2.06E-08    | 1.59E-12    | 2.73E-14 | 1.11E-06    | 2.06E-10 |
| phe.Fasting_rs151330468S8 | DIAPH1 | rs116120727S9  | BRD2      | 9.60E-12 | 0.000392176 | 1.53E-08    | 9.42E-15 | 3.84E-07    | 8.18E-11 |
| phe.Fasting_rs151330468S8 | DIAPH1 | rs116406581S2  | NA        | 5.24E-15 | 2.14E-07    | 1.36E-11    | 5.55E-08 | 1           | 8.42E-05 |
| phe.Fasting_rs151330468S8 | DIAPH1 | rs116548615S8  | TMEM45B   | 2.95E-17 | 1.21E-09    | 1.69E-13    | 1.84E-12 | 7.48E-05    | 8.04E-09 |
| phe.Fasting_rs151330468S8 | DIAPH1 | rs116696844S3  | AP3M2     | 1.90E-15 | 7.75E-08    | 5.41E-12    | 9.18E-08 | 1           | 1.31E-04 |
| phe.Fasting_rs151330468S8 | DIAPH1 | rs11989304 S4  | TMEM64    | 5.56E-07 | 1.00E+00    | 3.61E-04    | 1.15E-11 | 0.000469077 | 4.23E-08 |
| phe.Fasting_rs151330468S8 | DIAPH1 | rs140524622S7  | MRPL10    | 1.81E-17 | 7.37E-10    | 1.32E-13    | 2.85E-06 | 1           | 2.80E-03 |
| phe.Fasting_rs151330468S8 | DIAPH1 | rs146815317S5  | KPNA3     | 5.05E-16 | 2.06E-08    | 1.59E-12    | 2.49E-14 | 1.01E-06    | 1.89E-10 |
| phe.Fasting_rs151330468S8 | DIAPH1 | rs150117838S8  | KPNA3     | 5.05E-16 | 2.06E-08    | 1.59E-12    | 2.30E-14 | 9.36E-07    | 1.79E-10 |
| phe.Fasting_rs151330468S8 | DIAPH1 | rs150916187S4  | HIST1H2BK | 4.14E-06 | 1.00E+00    | 2.11E-03    | 2.81E-15 | 1.14E-07    | 2.72E-11 |
| phe.Fasting_rs151330468S8 | DIAPH1 | rs16894241 S4  | HIST1H2BK | 3.73E-12 | 1.52E-04    | 6.73E-09    | 7.18E-15 | 2.92E-07    | 6.39E-11 |
| phe.Fasting_rs151330468S8 | DIAPH1 | rs34801978 S3  | HOXB2     | 2.19E-06 | 1.00E+00    | 1.21E-03    | 2.24E-09 | 0.0911397   | 4.89E-06 |
| phe.Fasting_rs151330468S8 | DIAPH1 | rs4732511 S13  | POR       | 9.61E-15 | 3.93E-07    | 2.45E-11    | 2.90E-06 | 1           | 2.84E-03 |
| phe.Fasting_rs151330468S8 | DIAPH1 | rs57503635 S3  | NA        | 1.28E-16 | 5.23E-09    | 5.19E-13    | 7.18E-15 | 2.92E-07    | 6.39E-11 |
| phe.Fasting_rs151330468S8 | DIAPH1 | rs60011869 S16 | NA        | 2.13E-06 | 1.00E+00    | 1.18E-03    | 1.84E-07 | 1           | 2.46E-04 |
| phe.Fasting_rs151330468S8 | DIAPH1 | rs6964407 S7   | POR       | 3.32E-14 | 1.36E-06    | 8.04E-11    | 2.65E-06 | 1           | 2.63E-03 |
| phe.Fasting_rs151330468S8 | DIAPH1 | rs7004597 S8   | NA        | 1.25E-15 | 5.12E-08    | 3.65E-12    | 5.36E-08 | 1           | 8.16E-05 |
| phe.Fasting_rs151330468S8 | DIAPH1 | rs7256517 S7   | CYTH2     | 1.59E-16 | 6.48E-09    | 6.03E-13    | 1.01E-12 | 4.13E-05    | 4.74E-09 |
| phe.Fasting_rs151330468S8 | DIAPH1 | rs73283603 S7  | ZWINT     | 4.49E-07 | 1.00E+00    | 2.97E-04    | 4.87E-08 | 1           | 7.49E-05 |
| phe.Fasting_rs151330468S8 | DIAPH1 | rs73392640 S8  | POLR3B    | 4.58E-11 | 1.87E-03    | 6.24E-08    | 1.10E-11 | 0.000446024 | 4.04E-08 |
| phe.Fasting_rs151330468S8 | DIAPH1 | rs73619637 S8  | NA        | 2.00E-16 | 8.15E-09    | 6.95E-13    | 6.56E-08 | 1           | 9.80E-05 |
| phe.Fasting_rs151330468S8 | DIAPH1 | rs74627895 S8  | TMEM64    | 1.64E-07 | 1           | 0.000118218 | 4.43E-09 | 0.180369    | 9.00E-06 |
| phe.Fasting_rs151330468S8 | DIAPH1 | rs74914207 S24 | NA        | 2.89E-11 | 0.00117833  | 4.13E-08    | 1.71E-11 | 0.000696754 | 6.13E-08 |
| phe.Fasting_rs151330468S8 | DIAPH1 | rs75350765 S5  | RCL1      | 2.03E-17 | 8.30E-10    | 1.43E-13    | 8.22E-09 | 0.334664    | 1.57E-05 |
| phe.Fasting_rs151330468S8 | DIAPH1 | rs75374128 S5  | CNTLN     | 5.25E-06 | 1           | 0.00259743  | 1.90E-08 | 0.773981    | 3.28E-05 |
| phe.Fasting_rs151330468S8 | DIAPH1 | rs75506779 S5  | TMCO3     | 1.04E-07 | 1.00E+00    | 7.88E-05    | 2.35E-09 | 0.0955642   | 5.10E-06 |
| phe.Fasting_rs151330468S8 | DIAPH1 | rs75758702 S24 | NA        | 1.04E-17 | 4.25E-10    | 9.89E-14    | 2.90E-11 | 0.00117848  | 9.92E-08 |
| phe.Fasting_rs151330468S8 | DIAPH1 | rs75864203 S8  | CNTLN     | 5.25E-06 | 1.00E+00    | 2.60E-03    | 1.90E-08 | 0.773981    | 3.28E-05 |

|                           |        |            |             |            |            |             |             |          |             |             |          |
|---------------------------|--------|------------|-------------|------------|------------|-------------|-------------|----------|-------------|-------------|----------|
| phe.Fasting_rs151330468S8 | DIAPH1 | rs75949566 | S5          | TMEM64     | 6.52E-07   | 1.00E+00    | 4.16E-04    | 1.56E-11 | 0.000636403 | 5.61E-08    |          |
| phe.Fasting_rs151330468S8 | DIAPH1 | rs76844308 | S8          | CNTLN      | 2.67E-06   | 1.00E+00    | 1.44E-03    | 1.85E-08 | 0.754334    | 3.21E-05    |          |
| phe.Fasting_rs151330468S8 | DIAPH1 | rs7763107  | S8          | FARS2      | 9.44E-17   | 3.86E-09    | 4.06E-13    | 1.67E-12 | 6.82E-05    | 7.43E-09    |          |
| phe.Fasting_rs151330468S8 | DIAPH1 | rs77798597 | S7          | KPNA3      | 5.05E-16   | 2.06E-08    | 1.59E-12    | 2.30E-14 | 9.36E-07    | 1.79E-10    |          |
| phe.Fasting_rs151330468S8 | DIAPH1 | rs77845645 | S21         | NA         | 3.35E-07   | 1           | 0.000229183 | 1.07E-11 | 0.000437137 | 3.97E-08    |          |
| phe.Fasting_rs151330468S8 | DIAPH1 | rs78353402 | S8          | AP3M2      | 1.25E-15   | 5.12E-08    | 3.65E-12    | 9.18E-08 | 1           | 1.31E-04    |          |
| phe.Fasting_rs151330468S8 | DIAPH1 | rs78516788 | S8          | SLC38A1    | 1.24E-06   | 1           | 0.000737575 | 2.73E-09 | 0.111147    | 5.83E-06    |          |
| phe.Fasting_rs151330468S8 | DIAPH1 | rs78697063 | S5          | MSI2       | 7.77E-20   | 3.17E-12    | 2.23E-14    | 1.49E-10 | 0.00608249  | 4.45E-07    |          |
| phe.Fasting_rs151330468S8 | DIAPH1 | rs78703708 | S7          | FAF2       | 7.40E-12   | 0.000302252 | 1.27E-08    | 7.23E-06 | 1           | 6.23E-03    |          |
| phe.Fasting_rs151330468S8 | DIAPH1 | rs78722272 | S5          | CNTLN      | 5.25E-06   | 1           | 0.00259743  | 1.95E-08 | 0.795481    | 3.36E-05    |          |
| phe.Fasting_rs151330468S8 | DIAPH1 | rs78736524 | S5          | KPNA3      | 5.05E-16   | 2.06E-08    | 1.59E-12    | 2.49E-14 | 1.01E-06    | 1.89E-10    |          |
| phe.Fasting_rs151330468S8 | DIAPH1 | rs78990344 | S2          | LOC1005063 | 5.56E-07   | 1           | 0.000361481 | 1.15E-11 | 0.000469077 | 4.23E-08    |          |
| phe.Fasting_rs151330468S8 | DIAPH1 | rs79781495 | S8          | KPNA3      | 5.05E-16   | 2.06E-08    | 1.59E-12    | 2.30E-14 | 9.36E-07    | 1.79E-10    |          |
| phe.Fasting_rs151330468S8 | DIAPH1 | rs80200953 | S8          | PPP2R5D    | 1.41E-17   | 5.76E-10    | 1.14E-13    | 8.95E-10 | 0.0364115   | 2.15E-06    |          |
| phe.Fasting_rs151330468S8 | DIAPH1 | rs80332465 | S5          | KPNA3      | 5.36E-16   | 2.19E-08    | 1.67E-12    | 2.47E-14 | 1.00E-06    | 1.88E-10    |          |
| phe.Fasting_rs151330468S8 | DIAPH1 | rs80334773 | S5          | KPNA3      | 5.36E-16   | 2.19E-08    | 1.67E-12    | 2.47E-14 | 1.00E-06    | 1.88E-10    |          |
| phe.Fasting_rs151330468S8 | DIAPH1 | rs891061   | S7          | POP4       | 6.59E-07   | 1           | 4.20E-04    | 1.12E-05 | 1           | 8.91E-03    |          |
| phe.Fasting_rs1614182     | S7     | IFI16      | rs140524622 | MRPL10     | 5.45E-06   | 1           | 2.68E-03    | 1.31E-06 | 1           | 1.44E-03    |          |
| phe.Fasting_rs1616024     | S7     | IFI16      | rs140524622 | MRPL10     | 6.75E-06   | 1           | 3.25E-03    | 2.48E-07 | 1           | 3.20E-04    |          |
| phe.Fasting_rs1633262     | S7     | IFI16      | rs140524622 | MRPL10     | 6.41E-06   | 1           | 3.10E-03    | 1.30E-06 | 1           | 1.43E-03    |          |
| phe.Fasting_rs16827981    | S6     | LUZP1      | rs112348319 | SPTLC1     | 5.10E-06   | 1           | 2.53E-03    | 4.03E-07 | 1           | 4.91E-04    |          |
| phe.Fasting_rs16827981    | S6     | LUZP1      | rs112608164 | SPTLC1     | 5.10E-06   | 1           | 2.53E-03    | 4.03E-07 | 1           | 4.91E-04    |          |
| phe.Fasting_rs16827981    | S6     | LUZP1      | rs113568654 | S12        | SPTLC1     | 4.76E-06    | 1           | 2.38E-03 | 3.02E-06    | 1           | 2.94E-03 |
| phe.Fasting_rs16827981    | S6     | LUZP1      | rs76542405  | S5         | SPTLC1     | 5.10E-06    | 1           | 2.53E-03 | 4.03E-07    | 1           | 4.91E-04 |
| phe.Fasting_rs16827981    | S6     | LUZP1      | rs77523818  | S7         | SPTLC1     | 5.10E-06    | 1           | 2.53E-03 | 4.03E-07    | 1           | 4.91E-04 |
| phe.Fasting_rs16833550    | S5     | MYO1B      | rs112027720 | S7         | DIAPH1     | 9.79E-08    | 1           | 7.48E-05 | 3.09E-11    | 0.0012588   | 1.05E-07 |
| phe.Fasting_rs16833550    | S5     | MYO1B      | rs113219478 | S7         | DIAPH1     | 9.79E-08    | 1           | 7.48E-05 | 3.09E-11    | 0.0012588   | 1.05E-07 |
| phe.Fasting_rs16833550    | S5     | MYO1B      | rs113357907 | S24        | ISL1       | 1.90E-17    | 7.77E-10    | 1.37E-13 | 1.45E-14    | 5.92E-07    | 1.23E-10 |
| phe.Fasting_rs16833550    | S5     | MYO1B      | rs114565620 | S8         | RCL1       | 1.73E-05    | 1           | 7.33E-03 | 1.17E-05    | 1           | 9.26E-03 |
| phe.Fasting_rs16833550    | S5     | MYO1B      | rs115787552 | S5         | KPNA3      | 7.96E-16    | 3.25E-08    | 2.41E-12 | 5.07E-06    | 1           | 4.63E-03 |
| phe.Fasting_rs16833550    | S5     | MYO1B      | rs115888477 | S8         | NA         | 5.60E-15    | 2.29E-07    | 1.45E-11 | 1.26E-06    | 1           | 1.38E-03 |
| phe.Fasting_rs16833550    | S5     | MYO1B      | rs116011837 | S9         | BRD2       | 1.04E-11    | 0.000425035 | 1.65E-08 | 3.69E-09    | 0.150118    | 7.62E-06 |
| phe.Fasting_rs16833550    | S5     | MYO1B      | rs116079984 | S8         | KPNA3      | 7.96E-16    | 3.25E-08    | 2.41E-12 | 6.36E-06    | 1           | 5.60E-03 |
| phe.Fasting_rs16833550    | S5     | MYO1B      | rs116120727 | S9         | BRD2       | 1.04E-11    | 0.000425035 | 1.65E-08 | 3.69E-09    | 0.150118    | 7.62E-06 |
| phe.Fasting_rs16833550    | S5     | MYO1B      | rs116279995 | S20        | "PCDHGA4,P | 9.06E-07    | 1           | 5.55E-04 | 1.49E-11    | 0.000607459 | 5.38E-08 |
| phe.Fasting_rs16833550    | S5     | MYO1B      | rs12488988  | S6         | PHC3       | 1.15E-07    | 1           | 8.67E-05 | 5.95E-09    | 0.242257    | 1.16E-05 |
| phe.Fasting_rs16833550    | S5     | MYO1B      | rs12492606  | S8         | PHC3       | 1.15E-07    | 1           | 8.67E-05 | 5.83E-09    | 0.237501    | 1.14E-05 |
| phe.Fasting_rs16833550    | S5     | MYO1B      | rs13400525  | S8         | MFF        | 1.77E-16    | 7.22E-09    | 6.26E-13 | 3.64E-10    | 0.0148356   | 9.64E-07 |
| phe.Fasting_rs16833550    | S5     | MYO1B      | rs138090701 | S5         | HDAC3      | 1.46E-08    | 0.597843    | 1.33E-05 | 3.39E-11    | 0.001379    | 1.13E-07 |
| phe.Fasting_rs16833550    | S5     | MYO1B      | rs138136869 | S7         | DIAPH1     | 2.62E-08    | 1           | 2.27E-05 | 7.76E-12    | 0.000315945 | 2.94E-08 |

|                        |    |       |             |     |              |          |          |          |          |             |          |
|------------------------|----|-------|-------------|-----|--------------|----------|----------|----------|----------|-------------|----------|
| phe.Fasting_rs16833550 | S5 | MYO1B | rs138457103 | S10 | DIAPH1       | 6.37E-08 | 1        | 5.10E-05 | 3.34E-11 | 0.00135913  | 1.12E-07 |
| phe.Fasting_rs16833550 | S5 | MYO1B | rs138487229 | S11 | DIAPH1       | 9.79E-08 | 1        | 7.48E-05 | 3.09E-11 | 0.0012588   | 1.05E-07 |
| phe.Fasting_rs16833550 | S5 | MYO1B | rs138738950 | S8  | "PCDHGB2,PI  | 9.79E-08 | 1        | 7.48E-05 | 3.10E-11 | 0.00126244  | 1.05E-07 |
| phe.Fasting_rs16833550 | S5 | MYO1B | rs139297927 | S8  | DIAPH1       | 9.79E-08 | 1        | 7.48E-05 | 3.09E-11 | 0.0012588   | 1.05E-07 |
| phe.Fasting_rs16833550 | S5 | MYO1B | rs139337303 | S8  | DIAPH1       | 9.79E-08 | 1        | 7.48E-05 | 3.09E-11 | 0.0012588   | 1.05E-07 |
| phe.Fasting_rs16833550 | S5 | MYO1B | rs139403963 | S8  | DIAPH1       | 2.62E-08 | 1        | 2.27E-05 | 7.76E-12 | 0.000315945 | 2.94E-08 |
| phe.Fasting_rs16833550 | S5 | MYO1B | rs139621309 | S18 | "LOC1005056  | 9.79E-08 | 1        | 7.48E-05 | 3.09E-11 | 0.0012588   | 1.05E-07 |
| phe.Fasting_rs16833550 | S5 | MYO1B | rs139828110 | S8  | DIAPH1       | 2.62E-08 | 1        | 2.27E-05 | 7.76E-12 | 0.000315945 | 2.94E-08 |
| phe.Fasting_rs16833550 | S5 | MYO1B | rs140070363 | S8  | DIAPH1       | 9.79E-08 | 1        | 7.48E-05 | 3.09E-11 | 0.0012588   | 1.05E-07 |
| phe.Fasting_rs16833550 | S5 | MYO1B | rs140524622 | S7  | MRPL10       | 3.17E-17 | 1.30E-09 | 1.78E-13 | 4.05E-08 | 1           | 6.34E-05 |
| phe.Fasting_rs16833550 | S5 | MYO1B | rs140644750 | S13 | DIAPH1       | 9.79E-08 | 1        | 7.48E-05 | 3.09E-11 | 0.0012588   | 1.05E-07 |
| phe.Fasting_rs16833550 | S5 | MYO1B | rs141022544 | S8  | DIAPH1       | 9.79E-08 | 1        | 7.48E-05 | 3.09E-11 | 0.0012588   | 1.05E-07 |
| phe.Fasting_rs16833550 | S5 | MYO1B | rs141525984 | S5  | DIAPH1       | 9.79E-08 | 1        | 7.48E-05 | 3.09E-11 | 0.0012588   | 1.05E-07 |
| phe.Fasting_rs16833550 | S5 | MYO1B | rs141692339 | S3  | "PCDHGA6,PI  | 1.02E-06 | 1        | 6.18E-04 | 2.14E-11 | 0.000870877 | 7.53E-08 |
| phe.Fasting_rs16833550 | S5 | MYO1B | rs141926074 | S8  | ATE1         | 3.10E-18 | 1.27E-10 | 5.31E-14 | 1.61E-11 | 0.000654267 | 5.76E-08 |
| phe.Fasting_rs16833550 | S5 | MYO1B | rs142480565 | S8  | DIAPH1       | 9.79E-08 | 1        | 7.48E-05 | 3.09E-11 | 0.0012588   | 1.05E-07 |
| phe.Fasting_rs16833550 | S5 | MYO1B | rs142718558 | S7  | "DIAPH1,LOC  | 9.79E-08 | 1        | 7.48E-05 | 3.09E-11 | 0.0012588   | 1.05E-07 |
| phe.Fasting_rs16833550 | S5 | MYO1B | rs142789100 | S8  | DIAPH1       | 2.62E-08 | 1        | 2.27E-05 | 7.76E-12 | 0.000315945 | 2.94E-08 |
| phe.Fasting_rs16833550 | S5 | MYO1B | rs142812798 | S7  | DIAPH1       | 2.62E-08 | 1        | 2.27E-05 | 7.76E-12 | 0.000315945 | 2.94E-08 |
| phe.Fasting_rs16833550 | S5 | MYO1B | rs143377827 | S13 | "DIAPH1,LOC  | 2.28E-08 | 9.32E-01 | 2.00E-05 | 5.87E-12 | 0.000238849 | 2.28E-08 |
| phe.Fasting_rs16833550 | S5 | MYO1B | rs143691978 | S11 | DIAPH1       | 2.62E-08 | 1.00E+00 | 2.27E-05 | 8.27E-12 | 0.000336532 | 3.11E-08 |
| phe.Fasting_rs16833550 | S5 | MYO1B | rs144081334 | S11 | DIAPH1       | 2.62E-08 | 1.00E+00 | 2.27E-05 | 8.27E-12 | 0.000336532 | 3.11E-08 |
| phe.Fasting_rs16833550 | S5 | MYO1B | rs144613910 | S8  | DIAPH1       | 9.79E-08 | 1.00E+00 | 7.48E-05 | 3.09E-11 | 0.0012588   | 1.05E-07 |
| phe.Fasting_rs16833550 | S5 | MYO1B | rs145027704 | S11 | DIAPH1       | 2.62E-08 | 1.00E+00 | 2.27E-05 | 8.27E-12 | 0.000336532 | 3.11E-08 |
| phe.Fasting_rs16833550 | S5 | MYO1B | rs146220673 | S7  | DIAPH1       | 9.79E-08 | 1.00E+00 | 7.48E-05 | 3.09E-11 | 0.0012588   | 1.05E-07 |
| phe.Fasting_rs16833550 | S5 | MYO1B | rs146622060 | S13 | DIAPH1       | 2.62E-08 | 1.00E+00 | 2.27E-05 | 8.27E-12 | 0.000336532 | 3.11E-08 |
| phe.Fasting_rs16833550 | S5 | MYO1B | rs146815317 | S5  | KPNA3        | 7.96E-16 | 3.25E-08 | 2.41E-12 | 5.07E-06 | 1           | 4.63E-03 |
| phe.Fasting_rs16833550 | S5 | MYO1B | rs146878162 | S7  | DIAPH1       | 9.79E-08 | 1.00E+00 | 7.48E-05 | 3.09E-11 | 0.0012588   | 1.05E-07 |
| phe.Fasting_rs16833550 | S5 | MYO1B | rs147314451 | S8  | DIAPH1       | 9.79E-08 | 1.00E+00 | 7.48E-05 | 3.09E-11 | 0.0012588   | 1.05E-07 |
| phe.Fasting_rs16833550 | S5 | MYO1B | rs147417996 | S7  | DIAPH1       | 2.62E-08 | 1.00E+00 | 2.27E-05 | 8.27E-12 | 0.000336532 | 3.11E-08 |
| phe.Fasting_rs16833550 | S5 | MYO1B | rs147506725 | S21 | "PCDHGA1,PI  | 9.06E-07 | 1.00E+00 | 5.55E-04 | 1.49E-11 | 0.000607459 | 5.38E-08 |
| phe.Fasting_rs16833550 | S5 | MYO1B | rs147646948 | S7  | "LOC1005056  | 9.79E-08 | 1.00E+00 | 7.48E-05 | 3.09E-11 | 0.0012588   | 1.05E-07 |
| phe.Fasting_rs16833550 | S5 | MYO1B | rs147677041 | S8  | DIAPH1       | 2.62E-08 | 1.00E+00 | 2.27E-05 | 7.76E-12 | 0.000315945 | 2.94E-08 |
| phe.Fasting_rs16833550 | S5 | MYO1B | rs148116628 | S7  | DIAPH1       | 9.79E-08 | 1.00E+00 | 7.48E-05 | 3.09E-11 | 0.0012588   | 1.05E-07 |
| phe.Fasting_rs16833550 | S5 | MYO1B | rs148423011 | S7  | DIAPH1       | 9.79E-08 | 1.00E+00 | 7.48E-05 | 3.09E-11 | 0.0012588   | 1.05E-07 |
| phe.Fasting_rs16833550 | S5 | MYO1B | rs149019627 | S8  | DIAPH1       | 2.62E-08 | 1.00E+00 | 2.27E-05 | 7.76E-12 | 0.000315945 | 2.94E-08 |
| phe.Fasting_rs16833550 | S5 | MYO1B | rs149075406 | S8  | DIAPH1       | 9.79E-08 | 1.00E+00 | 7.48E-05 | 3.09E-11 | 0.0012588   | 1.05E-07 |
| phe.Fasting_rs16833550 | S5 | MYO1B | rs149334783 | S8  | DIAPH1       | 9.79E-08 | 1.00E+00 | 7.48E-05 | 3.09E-11 | 0.0012588   | 1.05E-07 |
| phe.Fasting_rs16833550 | S5 | MYO1B | rs149553852 | S21 | "PCDHGA10,PI | 9.06E-07 | 1.00E+00 | 5.55E-04 | 1.49E-11 | 0.000607459 | 5.38E-08 |
| phe.Fasting_rs16833550 | S5 | MYO1B | rs149716949 | S5  | DIAPH1       | 1.08E-08 | 4.40E-01 | 9.98E-06 | 3.36E-12 | 0.000136691 | 1.42E-08 |

|                        |    |       |             |     |             |          |             |          |             |             |          |
|------------------------|----|-------|-------------|-----|-------------|----------|-------------|----------|-------------|-------------|----------|
| phe.Fasting_rs16833550 | S5 | MYO1B | rs149791570 | S5  | DIAPH1      | 2.62E-08 | 1.00E+00    | 2.27E-05 | 7.76E-12    | 0.000315945 | 2.94E-08 |
| phe.Fasting_rs16833550 | S5 | MYO1B | rs150117838 | S8  | KPNA3       | 7.96E-16 | 3.25E-08    | 2.41E-12 | 5.07E-06    | 1           | 4.62E-03 |
| phe.Fasting_rs16833550 | S5 | MYO1B | rs150452206 | S13 | "DIAPH1,LOC | 9.79E-08 | 1.00E+00    | 7.48E-05 | 3.09E-11    | 0.0012588   | 1.05E-07 |
| phe.Fasting_rs16833550 | S5 | MYO1B | rs150675915 | S7  | DIAPH1      | 9.79E-08 | 1.00E+00    | 7.48E-05 | 3.09E-11    | 0.0012588   | 1.05E-07 |
| phe.Fasting_rs16833550 | S5 | MYO1B | rs150765570 | S7  | DIAPH1      | 9.79E-08 | 1.00E+00    | 7.48E-05 | 3.09E-11    | 0.0012588   | 1.05E-07 |
| phe.Fasting_rs16833550 | S5 | MYO1B | rs150992994 | S11 | "PCDHGA5,PI | 1.03E-07 | 1.00E+00    | 7.84E-05 | 2.99E-11    | 0.00121833  | 1.02E-07 |
| phe.Fasting_rs16833550 | S5 | MYO1B | rs151204700 | S8  | DIAPH1      | 9.79E-08 | 1.00E+00    | 7.48E-05 | 3.09E-11    | 0.0012588   | 1.05E-07 |
| phe.Fasting_rs16833550 | S5 | MYO1B | rs151330468 | S8  | DIAPH1      | 2.62E-08 | 1.00E+00    | 2.27E-05 | 8.27E-12    | 0.000336532 | 3.11E-08 |
| phe.Fasting_rs16833550 | S5 | MYO1B | rs16854875  | S2  | NA          | 8.80E-08 | 1.00E+00    | 6.80E-05 | 1.69E-06    | 1           | 1.79E-03 |
| phe.Fasting_rs16833550 | S5 | MYO1B | rs17236830  | S6  | PHC3        | 2.07E-07 | 1.00E+00    | 1.47E-04 | 7.39E-09    | 0.300856    | 1.42E-05 |
| phe.Fasting_rs16833550 | S5 | MYO1B | rs180772028 | S8  | "DIAPH1,LOC | 9.79E-08 | 1.00E+00    | 7.48E-05 | 3.09E-11    | 0.0012588   | 1.05E-07 |
| phe.Fasting_rs16833550 | S5 | MYO1B | rs181224861 | S7  | DIAPH1      | 9.79E-08 | 1.00E+00    | 7.48E-05 | 3.09E-11    | 0.0012588   | 1.05E-07 |
| phe.Fasting_rs16833550 | S5 | MYO1B | rs181247960 | S21 | "PCDHGA9,PI | 9.06E-07 | 1.00E+00    | 5.55E-04 | 1.49E-11    | 0.000607459 | 5.38E-08 |
| phe.Fasting_rs16833550 | S5 | MYO1B | rs181824655 | S21 | "PCDHGB6,PI | 9.06E-07 | 1.00E+00    | 5.55E-04 | 1.49E-11    | 0.000607459 | 5.38E-08 |
| phe.Fasting_rs16833550 | S5 | MYO1B | rs182714699 | S8  | DIAPH1      | 9.79E-08 | 1.00E+00    | 7.48E-05 | 3.09E-11    | 0.0012588   | 1.05E-07 |
| phe.Fasting_rs16833550 | S5 | MYO1B | rs182958142 | S8  | DIAPH1      | 1.43E-07 | 1.00E+00    | 1.05E-04 | 3.11E-12    | 0.00012643  | 1.32E-08 |
| phe.Fasting_rs16833550 | S5 | MYO1B | rs182965141 | S8  | DIAPH1      | 2.83E-08 | 1.00E+00    | 2.44E-05 | 2.36E-09    | 0.0961546   | 5.11E-06 |
| phe.Fasting_rs16833550 | S5 | MYO1B | rs183597049 | S7  | DIAPH1      | 9.79E-08 | 1.00E+00    | 7.48E-05 | 3.09E-11    | 0.0012588   | 1.05E-07 |
| phe.Fasting_rs16833550 | S5 | MYO1B | rs183980988 | S2  | NA          | 9.79E-08 | 1.00E+00    | 7.48E-05 | 3.09E-11    | 0.0012588   | 1.05E-07 |
| phe.Fasting_rs16833550 | S5 | MYO1B | rs184233232 | S7  | DIAPH1      | 9.79E-08 | 1.00E+00    | 7.48E-05 | 3.09E-11    | 0.0012588   | 1.05E-07 |
| phe.Fasting_rs16833550 | S5 | MYO1B | rs184509477 | S13 | "PCDHGB4,PI | 9.79E-08 | 1.00E+00    | 7.48E-05 | 3.09E-11    | 0.0012588   | 1.05E-07 |
| phe.Fasting_rs16833550 | S5 | MYO1B | rs185069296 | S15 | "LOC1005056 | 9.79E-08 | 1           | 7.48E-05 | 3.09E-11    | 0.0012588   | 1.05E-07 |
| phe.Fasting_rs16833550 | S5 | MYO1B | rs185502834 | S8  | DIAPH1      | 2.62E-08 | 1           | 2.27E-05 | 7.76E-12    | 0.000315945 | 2.94E-08 |
| phe.Fasting_rs16833550 | S5 | MYO1B | rs185759881 | S7  | DIAPH1      | 9.79E-08 | 1           | 7.48E-05 | 3.09E-11    | 0.0012588   | 1.05E-07 |
| phe.Fasting_rs16833550 | S5 | MYO1B | rs186288044 | S21 | "PCDHGB4,PI | 9.06E-07 | 0.000554629 | 1.49E-11 | 0.000607459 | 5.38E-08    |          |
| phe.Fasting_rs16833550 | S5 | MYO1B | rs187000011 | S11 | DIAPH1      | 9.79E-08 | 1           | 7.48E-05 | 3.09E-11    | 0.0012588   | 1.05E-07 |
| phe.Fasting_rs16833550 | S5 | MYO1B | rs188981295 | S5  | "RPS27AP10, | 9.79E-08 | 1           | 7.48E-05 | 3.09E-11    | 0.0012588   | 1.05E-07 |
| phe.Fasting_rs16833550 | S5 | MYO1B | rs190559574 | S7  | DIAPH1      | 2.62E-08 | 1           | 2.27E-05 | 7.76E-12    | 0.000315945 | 2.94E-08 |
| phe.Fasting_rs16833550 | S5 | MYO1B | rs191544043 | S8  | DIAPH1      | 9.79E-08 | 1           | 7.48E-05 | 3.09E-11    | 0.0012588   | 1.05E-07 |
| phe.Fasting_rs16833550 | S5 | MYO1B | rs191766712 | S7  | DIAPH1      | 9.79E-08 | 1           | 7.48E-05 | 3.09E-11    | 0.0012588   | 1.05E-07 |
| phe.Fasting_rs16833550 | S5 | MYO1B | rs192690040 | S7  | DIAPH1      | 9.79E-08 | 1           | 7.48E-05 | 3.09E-11    | 0.0012588   | 1.05E-07 |
| phe.Fasting_rs16833550 | S5 | MYO1B | rs192765219 | S7  | DIAPH1      | 9.79E-08 | 1           | 7.48E-05 | 3.09E-11    | 0.0012588   | 1.05E-07 |
| phe.Fasting_rs16833550 | S5 | MYO1B | rs192770525 | S7  | DIAPH1      | 9.79E-08 | 1           | 7.48E-05 | 3.09E-11    | 0.0012588   | 1.05E-07 |
| phe.Fasting_rs16833550 | S5 | MYO1B | rs2241292   | S8  | GPR160      | 1.19E-07 | 1           | 8.92E-05 | 9.16E-09    | 0.372765    | 1.73E-05 |
| phe.Fasting_rs16833550 | S5 | MYO1B | rs35990401  | S7  | DIAPH1      | 1.02E-07 | 1           | 7.74E-05 | 1.07E-11    | 0.000434617 | 3.95E-08 |
| phe.Fasting_rs16833550 | S5 | MYO1B | rs3772186   | S6  | PHC3        | 1.15E-07 | 1           | 8.67E-05 | 5.83E-09    | 0.237501    | 1.14E-05 |
| phe.Fasting_rs16833550 | S5 | MYO1B | rs55900860  | S7  | DIAPH1      | 2.62E-08 | 1           | 2.27E-05 | 7.76E-12    | 0.000315945 | 2.94E-08 |
| phe.Fasting_rs16833550 | S5 | MYO1B | rs57287019  | S5  | CLCN3       | 7.14E-12 | 0.000291407 | 1.23E-08 | 9.10E-06    | 1           | 7.56E-03 |
| phe.Fasting_rs16833550 | S5 | MYO1B | rs57503635  | S3  | NA          | 1.57E-07 | 1.00E+00    | 1.14E-04 | 2.65E-06    | 1           | 2.63E-03 |
| phe.Fasting_rs16833550 | S5 | MYO1B | rs58417766  | S7  | PHC3        | 1.15E-07 | 1           | 8.67E-05 | 5.83E-09    | 0.237501    | 1.14E-05 |

|                        |    |       |             |     |             |          |            |             |          |             |          |
|------------------------|----|-------|-------------|-----|-------------|----------|------------|-------------|----------|-------------|----------|
| phe.Fasting_rs16833550 | S5 | MYO1B | rs6763396   | S5  | PHC3        | 1.26E-07 | 1          | 9.39E-05    | 5.97E-09 | 0.242942    | 1.16E-05 |
| phe.Fasting_rs16833550 | S5 | MYO1B | rs6781454   | S8  | PHC3        | 1.18E-07 | 1          | 8.83E-05    | 5.93E-09 | 0.241483    | 1.15E-05 |
| phe.Fasting_rs16833550 | S5 | MYO1B | rs6786022   | S8  | PHC3        | 1.97E-07 | 1.00E+00   | 1.41E-04    | 7.21E-09 | 0.293397    | 1.39E-05 |
| phe.Fasting_rs16833550 | S5 | MYO1B | rs6808506   | S7  | PHC3        | 1.15E-07 | 1.00E+00   | 8.67E-05    | 5.83E-09 | 0.237501    | 1.14E-05 |
| phe.Fasting_rs16833550 | S5 | MYO1B | rs6881310   | S23 | ISL1        | 1.28E-16 | 5.24E-09   | 5.19E-13    | 6.78E-12 | 0.000276007 | 2.61E-08 |
| phe.Fasting_rs16833550 | S5 | MYO1B | rs7256517   | S7  | CYTH2       | 5.50E-06 | 1          | 0.00270228  | 4.49E-06 | 1           | 4.17E-03 |
| phe.Fasting_rs16833550 | S5 | MYO1B | rs73619637  | S8  | NA          | 2.17E-07 | 1          | 0.000153959 | 3.42E-15 | 1.39E-07    | 3.27E-11 |
| phe.Fasting_rs16833550 | S5 | MYO1B | rs73879173  | S8  | PHC3        | 1.15E-07 | 1          | 8.67E-05    | 5.83E-09 | 0.237501    | 1.14E-05 |
| phe.Fasting_rs16833550 | S5 | MYO1B | rs73879178  | S10 | PHC3        | 1.97E-07 | 1          | 0.000140847 | 7.21E-09 | 0.293397    | 1.39E-05 |
| phe.Fasting_rs16833550 | S5 | MYO1B | rs73879182  | S6  | PHC3        | 1.15E-07 | 1          | 8.67E-05    | 5.83E-09 | 0.237501    | 1.14E-05 |
| phe.Fasting_rs16833550 | S5 | MYO1B | rs75350765  | S5  | RCL1        | 1.73E-05 | 1          | 0.00732632  | 1.17E-05 | 1           | 9.26E-03 |
| phe.Fasting_rs16833550 | S5 | MYO1B | rs75758702  | S24 | NA          | 1.75E-17 | 7.14E-10   | 1.30E-13    | 1.81E-11 | 0.00073509  | 6.44E-08 |
| phe.Fasting_rs16833550 | S5 | MYO1B | rs76146702  | S5  | PHC3        | 1.29E-07 | 1          | 9.54E-05    | 3.54E-09 | 0.143964    | 7.36E-06 |
| phe.Fasting_rs16833550 | S5 | MYO1B | rs7615039   | S8  | PHC3        | 1.04E-07 | 1          | 7.87E-05    | 8.80E-09 | 0.358195    | 1.66E-05 |
| phe.Fasting_rs16833550 | S5 | MYO1B | rs7638400   | S7  | PHC3        | 1.15E-07 | 1          | 8.67E-05    | 5.83E-09 | 0.237501    | 1.14E-05 |
| phe.Fasting_rs16833550 | S5 | MYO1B | rs76737663  | S1  | LOC654841   | 2.11E-16 | 8.60E-09   | 7.21E-13    | 4.11E-09 | 0.167446    | 8.42E-06 |
| phe.Fasting_rs16833550 | S5 | MYO1B | rs77444916  | S23 | LOC642366   | 4.42E-17 | 1.80E-09   | 2.29E-13    | 1.38E-14 | 5.64E-07    | 1.17E-10 |
| phe.Fasting_rs16833550 | S5 | MYO1B | rs77798597  | S7  | KPNA3       | 7.96E-16 | 3.25E-08   | 2.41E-12    | 5.07E-06 | 1           | 4.62E-03 |
| phe.Fasting_rs16833550 | S5 | MYO1B | rs78516788  | S8  | SLC38A1     | 1.55E-06 | 1          | 0.000897933 | 1.95E-10 | 0.00793647  | 5.55E-07 |
| phe.Fasting_rs16833550 | S5 | MYO1B | rs78736524  | S5  | KPNA3       | 7.96E-16 | 3.25E-08   | 2.41E-12    | 5.07E-06 | 1           | 4.63E-03 |
| phe.Fasting_rs16833550 | S5 | MYO1B | rs79389383  | S8  | PHC3        | 1.18E-07 | 1          | 8.83E-05    | 5.93E-09 | 0.241483    | 1.15E-05 |
| phe.Fasting_rs16833550 | S5 | MYO1B | rs79517926  | S15 | "DIAPH1,LOC | 3.50E-08 | 1          | 2.97E-05    | 4.03E-12 | 0.000164122 | 1.65E-08 |
| phe.Fasting_rs16833550 | S5 | MYO1B | rs79518241  | S6  | PHC3        | 1.15E-07 | 1          | 8.67E-05    | 5.83E-09 | 0.237501    | 1.14E-05 |
| phe.Fasting_rs16833550 | S5 | MYO1B | rs79781495  | S8  | KPNA3       | 7.96E-16 | 3.25E-08   | 2.41E-12    | 5.07E-06 | 1           | 4.62E-03 |
| phe.Fasting_rs16833550 | S5 | MYO1B | rs80258830  | S24 | LOC642366   | 4.42E-17 | 1.80E-09   | 2.29E-13    | 1.38E-14 | 5.64E-07    | 1.17E-10 |
| phe.Fasting_rs16833550 | S5 | MYO1B | rs80332465  | S5  | KPNA3       | 8.49E-16 | 3.47E-08   | 2.54E-12    | 5.25E-06 | 1           | 4.77E-03 |
| phe.Fasting_rs16833550 | S5 | MYO1B | rs80334773  | S5  | KPNA3       | 8.49E-16 | 3.47E-08   | 2.54E-12    | 5.25E-06 | 1           | 4.77E-03 |
| phe.Fasting_rs16833551 | S5 | MYO1B | rs111576333 | S5  | TMEM64      | 3.09E-07 | 1          | 0.000212884 | 1.92E-06 | 1           | 2.00E-03 |
| phe.Fasting_rs16833551 | S5 | MYO1B | rs112027720 | S7  | DIAPH1      | 3.86E-07 | 1          | 0.000261363 | 6.27E-11 | 0.00255205  | 1.99E-07 |
| phe.Fasting_rs16833551 | S5 | MYO1B | rs112089881 | S8  | ZFAND4      | 2.84E-17 | 1.16E-09   | 1.64E-13    | 6.33E-17 | 2.58E-09    | 4.34E-12 |
| phe.Fasting_rs16833551 | S5 | MYO1B | rs112091318 | S5  | TMEM64      | 7.05E-08 | 1          | 5.58E-05    | 2.35E-06 | 1           | 2.37E-03 |
| phe.Fasting_rs16833551 | S5 | MYO1B | rs113219478 | S7  | DIAPH1      | 3.86E-07 | 1          | 0.000261363 | 6.27E-11 | 0.00255205  | 1.99E-07 |
| phe.Fasting_rs16833551 | S5 | MYO1B | rs113357907 | S24 | ISL1        | 9.39E-17 | 3.83E-09   | 4.04E-13    | 2.87E-14 | 1.17E-06    | 2.15E-10 |
| phe.Fasting_rs16833551 | S5 | MYO1B | rs115787552 | S5  | KPNA3       | 3.52E-15 | 1.44E-07   | 9.50E-12    | 1.67E-14 | 6.81E-07    | 1.39E-10 |
| phe.Fasting_rs16833551 | S5 | MYO1B | rs115888477 | S8  | NA          | 2.34E-14 | 9.54E-07   | 5.76E-11    | 2.76E-15 | 1.12E-07    | 2.68E-11 |
| phe.Fasting_rs16833551 | S5 | MYO1B | rs116011837 | S9  | BRD2        | 5.08E-11 | 0.00207636 | 6.87E-08    | 7.52E-09 | 0.305956    | 1.44E-05 |
| phe.Fasting_rs16833551 | S5 | MYO1B | rs116079984 | S8  | KPNA3       | 3.52E-15 | 1.44E-07   | 9.50E-12    | 1.99E-14 | 8.11E-07    | 1.60E-10 |
| phe.Fasting_rs16833551 | S5 | MYO1B | rs116120727 | S9  | BRD2        | 5.08E-11 | 0.00207636 | 6.87E-08    | 7.52E-09 | 0.305956    | 1.44E-05 |
| phe.Fasting_rs16833551 | S5 | MYO1B | rs116279995 | S20 | "PCDHGA4,PI | 4.89E-06 | 1          | 2.44E-03    | 3.26E-11 | 0.00132645  | 1.09E-07 |
| phe.Fasting_rs16833551 | S5 | MYO1B | rs11989304  | S4  | TMEM64      | 3.09E-07 | 1          | 2.13E-04    | 1.88E-06 | 1           | 1.96E-03 |

|                        |    |       |             |     |               |          |          |             |          |             |          |
|------------------------|----|-------|-------------|-----|---------------|----------|----------|-------------|----------|-------------|----------|
| phe.Fasting_rs16833551 | S5 | MYO1B | rs12488988  | S6  | PHC3          | 8.15E-07 | 1        | 5.07E-04    | 2.15E-10 | 0.00874358  | 6.03E-07 |
| phe.Fasting_rs16833551 | S5 | MYO1B | rs12492606  | S8  | PHC3          | 8.15E-07 | 1        | 0.000506657 | 2.10E-10 | 0.0085648   | 5.91E-07 |
| phe.Fasting_rs16833551 | S5 | MYO1B | rs13400525  | S8  | MFF           | 2.55E-15 | 1.04E-07 | 7.15E-12    | 1.56E-09 | 0.0636724   | 3.54E-06 |
| phe.Fasting_rs16833551 | S5 | MYO1B | rs138090701 | S5  | HDAC3         | 6.94E-08 | 1        | 5.50E-05    | 7.40E-11 | 0.00301316  | 2.31E-07 |
| phe.Fasting_rs16833551 | S5 | MYO1B | rs138136869 | S7  | DIAPH1        | 1.27E-07 | 1        | 9.46E-05    | 1.73E-11 | 0.000702612 | 6.17E-08 |
| phe.Fasting_rs16833551 | S5 | MYO1B | rs138457103 | S10 | DIAPH1        | 2.64E-07 | 1        | 0.000184133 | 6.93E-11 | 0.00282278  | 2.18E-07 |
| phe.Fasting_rs16833551 | S5 | MYO1B | rs138487229 | S11 | DIAPH1        | 3.86E-07 | 1        | 0.000261363 | 6.27E-11 | 0.00255205  | 1.99E-07 |
| phe.Fasting_rs16833551 | S5 | MYO1B | rs138738950 | S8  | "PCDHGB2,PI   | 3.86E-07 | 1        | 0.000261363 | 6.30E-11 | 0.00256404  | 2.00E-07 |
| phe.Fasting_rs16833551 | S5 | MYO1B | rs139297927 | S8  | DIAPH1        | 3.86E-07 | 1        | 0.000261363 | 6.27E-11 | 0.00255205  | 1.99E-07 |
| phe.Fasting_rs16833551 | S5 | MYO1B | rs139337303 | S8  | DIAPH1        | 3.86E-07 | 1        | 0.000261363 | 6.27E-11 | 0.00255205  | 1.99E-07 |
| phe.Fasting_rs16833551 | S5 | MYO1B | rs139403963 | S8  | DIAPH1        | 1.27E-07 | 1        | 9.46E-05    | 1.73E-11 | 0.000702612 | 6.17E-08 |
| phe.Fasting_rs16833551 | S5 | MYO1B | rs139621309 | S18 | "LOC100505056 | 3.86E-07 | 1        | 0.000261363 | 6.27E-11 | 0.00255205  | 1.99E-07 |
| phe.Fasting_rs16833551 | S5 | MYO1B | rs139828110 | S8  | DIAPH1        | 1.27E-07 | 1        | 9.46E-05    | 1.73E-11 | 0.000702612 | 6.17E-08 |
| phe.Fasting_rs16833551 | S5 | MYO1B | rs140070363 | S8  | DIAPH1        | 3.86E-07 | 1        | 0.000261363 | 6.27E-11 | 0.00255205  | 1.99E-07 |
| phe.Fasting_rs16833551 | S5 | MYO1B | rs140524622 | S7  | MRPL10        | 1.33E-16 | 5.44E-09 | 5.32E-13    | 8.46E-08 | 1           | 1.22E-04 |
| phe.Fasting_rs16833551 | S5 | MYO1B | rs140644750 | S13 | DIAPH1        | 3.86E-07 | 1        | 0.000261363 | 6.27E-11 | 0.00255205  | 1.99E-07 |
| phe.Fasting_rs16833551 | S5 | MYO1B | rs141022544 | S8  | DIAPH1        | 3.86E-07 | 1        | 0.000261363 | 6.27E-11 | 0.00255205  | 1.99E-07 |
| phe.Fasting_rs16833551 | S5 | MYO1B | rs141525984 | S5  | DIAPH1        | 3.86E-07 | 1        | 0.000261363 | 6.27E-11 | 0.00255205  | 1.99E-07 |
| phe.Fasting_rs16833551 | S5 | MYO1B | rs141692339 | S3  | "PCDHGA6,PI   | 5.36E-06 | 1        | 0.00264569  | 4.60E-11 | 0.00187259  | 1.50E-07 |
| phe.Fasting_rs16833551 | S5 | MYO1B | rs141926074 | S8  | ATE1          | 1.61E-17 | 6.58E-10 | 1.23E-13    | 3.34E-11 | 0.00135974  | 1.12E-07 |
| phe.Fasting_rs16833551 | S5 | MYO1B | rs142480565 | S8  | DIAPH1        | 3.86E-07 | 1        | 0.000261363 | 6.27E-11 | 0.00255205  | 1.99E-07 |
| phe.Fasting_rs16833551 | S5 | MYO1B | rs142718558 | S7  | "DIAPH1,LOC   | 3.86E-07 | 1        | 0.000261363 | 6.27E-11 | 0.00255205  | 1.99E-07 |
| phe.Fasting_rs16833551 | S5 | MYO1B | rs142789100 | S8  | DIAPH1        | 1.27E-07 | 1        | 9.46E-05    | 1.73E-11 | 0.000702612 | 6.17E-08 |
| phe.Fasting_rs16833551 | S5 | MYO1B | rs142812798 | S7  | DIAPH1        | 1.27E-07 | 1        | 9.46E-05    | 1.73E-11 | 0.000702612 | 6.17E-08 |
| phe.Fasting_rs16833551 | S5 | MYO1B | rs143377827 | S13 | "DIAPH1,LOC   | 1.08E-07 | 1        | 8.17E-05    | 1.30E-11 | 0.000529506 | 4.76E-08 |
| phe.Fasting_rs16833551 | S5 | MYO1B | rs143691978 | S11 | DIAPH1        | 1.27E-07 | 1        | 9.46E-05    | 1.83E-11 | 0.000745458 | 6.52E-08 |
| phe.Fasting_rs16833551 | S5 | MYO1B | rs144081334 | S11 | DIAPH1        | 1.27E-07 | 1        | 9.46E-05    | 1.83E-11 | 0.000745458 | 6.52E-08 |
| phe.Fasting_rs16833551 | S5 | MYO1B | rs144613910 | S8  | DIAPH1        | 3.86E-07 | 1        | 0.000261363 | 6.27E-11 | 0.00255205  | 1.99E-07 |
| phe.Fasting_rs16833551 | S5 | MYO1B | rs145027704 | S11 | DIAPH1        | 1.27E-07 | 1        | 9.46E-05    | 1.83E-11 | 0.000745458 | 6.52E-08 |
| phe.Fasting_rs16833551 | S5 | MYO1B | rs146220673 | S7  | DIAPH1        | 3.86E-07 | 1        | 0.000261363 | 6.27E-11 | 0.00255205  | 1.99E-07 |
| phe.Fasting_rs16833551 | S5 | MYO1B | rs146622060 | S13 | DIAPH1        | 1.27E-07 | 1        | 9.46E-05    | 1.83E-11 | 0.000745458 | 6.52E-08 |
| phe.Fasting_rs16833551 | S5 | MYO1B | rs146815317 | S5  | KPNA3         | 3.52E-15 | 1.44E-07 | 9.50E-12    | 1.67E-14 | 6.81E-07    | 1.39E-10 |
| phe.Fasting_rs16833551 | S5 | MYO1B | rs146878162 | S7  | DIAPH1        | 3.86E-07 | 1        | 0.000261363 | 6.27E-11 | 0.00255205  | 1.99E-07 |
| phe.Fasting_rs16833551 | S5 | MYO1B | rs147314451 | S8  | DIAPH1        | 3.86E-07 | 1        | 2.61E-04    | 6.27E-11 | 0.00255205  | 1.99E-07 |
| phe.Fasting_rs16833551 | S5 | MYO1B | rs147417996 | S7  | DIAPH1        | 1.27E-07 | 1.00E+00 | 9.46E-05    | 1.83E-11 | 0.000745458 | 6.52E-08 |
| phe.Fasting_rs16833551 | S5 | MYO1B | rs147506725 | S21 | "PCDHGA1,PI   | 4.89E-06 | 1.00E+00 | 2.44E-03    | 3.26E-11 | 0.00132645  | 1.09E-07 |
| phe.Fasting_rs16833551 | S5 | MYO1B | rs147646948 | S7  | "LOC100505056 | 3.86E-07 | 1.00E+00 | 2.61E-04    | 6.27E-11 | 0.00255205  | 1.99E-07 |
| phe.Fasting_rs16833551 | S5 | MYO1B | rs147677041 | S8  | DIAPH1        | 1.27E-07 | 1.00E+00 | 9.46E-05    | 1.73E-11 | 0.000702612 | 6.17E-08 |
| phe.Fasting_rs16833551 | S5 | MYO1B | rs148116628 | S7  | DIAPH1        | 3.86E-07 | 1.00E+00 | 2.61E-04    | 6.27E-11 | 0.00255205  | 1.99E-07 |
| phe.Fasting_rs16833551 | S5 | MYO1B | rs148423011 | S7  | DIAPH1        | 3.86E-07 | 1.00E+00 | 2.61E-04    | 6.27E-11 | 0.00255205  | 1.99E-07 |

|                        |    |       |             |     |             |          |          |             |          |             |          |
|------------------------|----|-------|-------------|-----|-------------|----------|----------|-------------|----------|-------------|----------|
| phe.Fasting_rs16833551 | S5 | MYO1B | rs149019627 | S8  | DIAPH1      | 1.27E-07 | 1.00E+00 | 9.46E-05    | 1.73E-11 | 0.000702612 | 6.17E-08 |
| phe.Fasting_rs16833551 | S5 | MYO1B | rs149075406 | S8  | DIAPH1      | 3.86E-07 | 1.00E+00 | 2.61E-04    | 6.27E-11 | 0.00255205  | 1.99E-07 |
| phe.Fasting_rs16833551 | S5 | MYO1B | rs149334783 | S8  | DIAPH1      | 3.86E-07 | 1        | 0.000261363 | 6.27E-11 | 0.00255205  | 1.99E-07 |
| phe.Fasting_rs16833551 | S5 | MYO1B | rs149553852 | S21 | "PCDHGA10,  | 4.89E-06 | 1        | 0.00244201  | 3.26E-11 | 0.00132645  | 1.09E-07 |
| phe.Fasting_rs16833551 | S5 | MYO1B | rs149716949 | S5  | DIAPH1      | 5.19E-08 | 1        | 4.23E-05    | 8.07E-12 | 0.000328506 | 3.04E-08 |
| phe.Fasting_rs16833551 | S5 | MYO1B | rs149791570 | S5  | DIAPH1      | 1.27E-07 | 1        | 9.46E-05    | 1.73E-11 | 0.000702612 | 6.17E-08 |
| phe.Fasting_rs16833551 | S5 | MYO1B | rs150117838 | S8  | KPNA3       | 3.52E-15 | 1.44E-07 | 9.50E-12    | 1.60E-14 | 6.50E-07    | 1.34E-10 |
| phe.Fasting_rs16833551 | S5 | MYO1B | rs150452206 | S13 | "DIAPH1,LOC | 3.86E-07 | 1        | 0.000261363 | 6.27E-11 | 0.00255205  | 1.99E-07 |
| phe.Fasting_rs16833551 | S5 | MYO1B | rs150675915 | S7  | DIAPH1      | 3.86E-07 | 1        | 0.000261363 | 6.27E-11 | 0.00255205  | 1.99E-07 |
| phe.Fasting_rs16833551 | S5 | MYO1B | rs150765570 | S7  | DIAPH1      | 3.86E-07 | 1        | 0.000261363 | 6.27E-11 | 0.00255205  | 1.99E-07 |
| phe.Fasting_rs16833551 | S5 | MYO1B | rs150992994 | S11 | "PCDHGA5,Pl | 4.04E-07 | 1        | 0.000271209 | 6.11E-11 | 0.00248821  | 1.95E-07 |
| phe.Fasting_rs16833551 | S5 | MYO1B | rs151204700 | S8  | DIAPH1      | 3.86E-07 | 1        | 0.000261363 | 6.27E-11 | 0.00255205  | 1.99E-07 |
| phe.Fasting_rs16833551 | S5 | MYO1B | rs151330468 | S8  | DIAPH1      | 1.27E-07 | 1        | 9.46E-05    | 1.83E-11 | 0.000745458 | 6.52E-08 |
| phe.Fasting_rs16833551 | S5 | MYO1B | rs16854875  | S2  | NA          | 6.35E-07 | 1        | 0.000406119 | 3.32E-07 | 1           | 4.15E-04 |
| phe.Fasting_rs16833551 | S5 | MYO1B | rs17236830  | S6  | PHC3        | 1.37E-06 | 1        | 0.000805831 | 2.63E-10 | 0.0107117   | 7.22E-07 |
| phe.Fasting_rs16833551 | S5 | MYO1B | rs180772028 | S8  | "DIAPH1,LOC | 3.86E-07 | 1        | 0.000261363 | 6.27E-11 | 0.00255205  | 1.99E-07 |
| phe.Fasting_rs16833551 | S5 | MYO1B | rs181224861 | S7  | DIAPH1      | 3.86E-07 | 1        | 2.61E-04    | 6.27E-11 | 0.00255205  | 1.99E-07 |
| phe.Fasting_rs16833551 | S5 | MYO1B | rs181247960 | S21 | "PCDHGA9,Pl | 4.89E-06 | 1        | 2.44E-03    | 3.26E-11 | 0.00132645  | 1.09E-07 |
| phe.Fasting_rs16833551 | S5 | MYO1B | rs181824655 | S21 | "PCDHGB6,Pl | 4.89E-06 | 1        | 2.44E-03    | 3.26E-11 | 0.00132645  | 1.09E-07 |
| phe.Fasting_rs16833551 | S5 | MYO1B | rs182714699 | S8  | DIAPH1      | 3.86E-07 | 1        | 2.61E-04    | 6.27E-11 | 0.00255205  | 1.99E-07 |
| phe.Fasting_rs16833551 | S5 | MYO1B | rs182958142 | S8  | DIAPH1      | 6.17E-07 | 1        | 3.96E-04    | 7.12E-12 | 0.000289764 | 2.73E-08 |
| phe.Fasting_rs16833551 | S5 | MYO1B | rs182965141 | S8  | DIAPH1      | 1.39E-07 | 1        | 1.02E-04    | 5.34E-09 | 0.217272    | 1.05E-05 |
| phe.Fasting_rs16833551 | S5 | MYO1B | rs183597049 | S7  | DIAPH1      | 3.86E-07 | 1        | 2.61E-04    | 6.27E-11 | 0.00255205  | 1.99E-07 |
| phe.Fasting_rs16833551 | S5 | MYO1B | rs183980988 | S2  | NA          | 3.86E-07 | 1        | 2.61E-04    | 6.27E-11 | 0.00255205  | 1.99E-07 |
| phe.Fasting_rs16833551 | S5 | MYO1B | rs184233232 | S7  | DIAPH1      | 3.86E-07 | 1        | 0.000261363 | 6.27E-11 | 0.00255205  | 1.99E-07 |
| phe.Fasting_rs16833551 | S5 | MYO1B | rs184509477 | S13 | "PCDHGB4,Pl | 3.86E-07 | 1        | 0.000261363 | 6.27E-11 | 0.00255205  | 1.99E-07 |
| phe.Fasting_rs16833551 | S5 | MYO1B | rs185069296 | S15 | "LOC100505  | 3.86E-07 | 1        | 0.000261363 | 6.27E-11 | 0.00255205  | 1.99E-07 |
| phe.Fasting_rs16833551 | S5 | MYO1B | rs185502834 | S8  | DIAPH1      | 1.27E-07 | 1        | 9.46E-05    | 1.73E-11 | 0.000702612 | 6.17E-08 |
| phe.Fasting_rs16833551 | S5 | MYO1B | rs185759881 | S7  | DIAPH1      | 3.86E-07 | 1        | 0.000261363 | 6.27E-11 | 0.00255205  | 1.99E-07 |
| phe.Fasting_rs16833551 | S5 | MYO1B | rs186288044 | S21 | "PCDHGB4,Pl | 4.89E-06 | 1.00E+00 | 2.44E-03    | 3.26E-11 | 0.00132645  | 1.09E-07 |
| phe.Fasting_rs16833551 | S5 | MYO1B | rs187000011 | S11 | DIAPH1      | 3.86E-07 | 1.00E+00 | 2.61E-04    | 6.27E-11 | 0.00255205  | 1.99E-07 |
| phe.Fasting_rs16833551 | S5 | MYO1B | rs188981295 | S5  | "RPS27AP10, | 3.86E-07 | 1        | 0.000261363 | 6.27E-11 | 0.00255205  | 1.99E-07 |
| phe.Fasting_rs16833551 | S5 | MYO1B | rs190559574 | S7  | DIAPH1      | 1.27E-07 | 1        | 9.46E-05    | 1.73E-11 | 0.000702612 | 6.17E-08 |
| phe.Fasting_rs16833551 | S5 | MYO1B | rs191544043 | S8  | DIAPH1      | 3.86E-07 | 1        | 0.000261363 | 6.27E-11 | 0.00255205  | 1.99E-07 |
| phe.Fasting_rs16833551 | S5 | MYO1B | rs191766712 | S7  | DIAPH1      | 3.86E-07 | 1        | 0.000261363 | 6.27E-11 | 0.00255205  | 1.99E-07 |
| phe.Fasting_rs16833551 | S5 | MYO1B | rs192690040 | S7  | DIAPH1      | 3.86E-07 | 1        | 0.000261363 | 6.27E-11 | 0.00255205  | 1.99E-07 |
| phe.Fasting_rs16833551 | S5 | MYO1B | rs192765219 | S7  | DIAPH1      | 3.86E-07 | 1        | 0.000261363 | 6.27E-11 | 0.00255205  | 1.99E-07 |
| phe.Fasting_rs16833551 | S5 | MYO1B | rs192770525 | S7  | DIAPH1      | 3.86E-07 | 1        | 0.000261363 | 6.27E-11 | 0.00255205  | 1.99E-07 |
| phe.Fasting_rs16833551 | S5 | MYO1B | rs2241292   | S8  | GPR160      | 8.36E-07 | 1        | 0.000515653 | 3.70E-10 | 0.0150659   | 9.78E-07 |
| phe.Fasting_rs16833551 | S5 | MYO1B | rs35990401  | S7  | DIAPH1      | 4.21E-07 | 1        | 0.000281178 | 2.26E-11 | 0.000919612 | 7.88E-08 |



|                        |    |       |             |     |             |          |            |             |          |             |          |
|------------------------|----|-------|-------------|-----|-------------|----------|------------|-------------|----------|-------------|----------|
| phe.Fasting_rs16833551 | S5 | MYO1B | rs3772186   | S6  | PHC3        | 8.15E-07 | 1          | 0.000506657 | 2.10E-10 | 0.0085648   | 5.91E-07 |
| phe.Fasting_rs16833551 | S5 | MYO1B | rs55900860  | S7  | DIAPH1      | 1.27E-07 | 1          | 9.46E-05    | 1.73E-11 | 0.000702612 | 6.17E-08 |
| phe.Fasting_rs16833551 | S5 | MYO1B | rs57503635  | S3  | NA          | 6.66E-07 | 1          | 0.00042329  | 5.09E-06 | 1           | 4.64E-03 |
| phe.Fasting_rs16833551 | S5 | MYO1B | rs58417766  | S7  | PHC3        | 8.15E-07 | 1          | 0.000506657 | 2.10E-10 | 0.0085648   | 5.91E-07 |
| phe.Fasting_rs16833551 | S5 | MYO1B | rs6763396   | S5  | PHC3        | 8.76E-07 | 1          | 0.000537443 | 2.13E-10 | 0.00867828  | 5.98E-07 |
| phe.Fasting_rs16833551 | S5 | MYO1B | rs6781454   | S8  | PHC3        | 8.31E-07 | 1          | 0.000514116 | 2.11E-10 | 0.00860569  | 5.94E-07 |
| phe.Fasting_rs16833551 | S5 | MYO1B | rs6786022   | S8  | PHC3        | 1.32E-06 | 1          | 0.000777341 | 2.58E-10 | 0.0105158   | 7.10E-07 |
| phe.Fasting_rs16833551 | S5 | MYO1B | rs6808506   | S7  | PHC3        | 8.15E-07 | 1          | 0.000506657 | 2.10E-10 | 0.0085648   | 5.91E-07 |
| phe.Fasting_rs16833551 | S5 | MYO1B | rs6881310   | S23 | ISL1        | 6.19E-16 | 2.53E-08   | 1.91E-12    | 1.51E-11 | 0.000616514 | 5.45E-08 |
| phe.Fasting_rs16833551 | S5 | MYO1B | rs7203984   | S15 | CETP        | 1.13E-10 | 0.00463374 | 1.45E-07    | 1.24E-05 | 1           | 9.63E-03 |
| phe.Fasting_rs16833551 | S5 | MYO1B | rs7256517   | S7  | CYTH2       | 1.91E-05 | 1          | 0.0080183   | 1.06E-05 | 1           | 8.62E-03 |
| phe.Fasting_rs16833551 | S5 | MYO1B | rs73392640  | S8  | POLR3B      | 2.03E-15 | 8.30E-08   | 5.76E-12    | 4.34E-06 | 1           | 4.05E-03 |
| phe.Fasting_rs16833551 | S5 | MYO1B | rs73619637  | S8  | NA          | 8.86E-07 | 1          | 0.000542795 | 8.99E-15 | 3.66E-07    | 7.89E-11 |
| phe.Fasting_rs16833551 | S5 | MYO1B | rs73879173  | S8  | PHC3        | 8.15E-07 | 1          | 0.000506657 | 2.10E-10 | 0.0085648   | 5.91E-07 |
| phe.Fasting_rs16833551 | S5 | MYO1B | rs73879178  | S10 | PHC3        | 1.32E-06 | 1          | 0.000777341 | 2.58E-10 | 0.0105158   | 7.10E-07 |
| phe.Fasting_rs16833551 | S5 | MYO1B | rs73879182  | S6  | PHC3        | 8.15E-07 | 1          | 0.000506657 | 2.10E-10 | 0.0085648   | 5.91E-07 |
| phe.Fasting_rs16833551 | S5 | MYO1B | rs74627895  | S8  | TMEM64      | 7.05E-08 | 1          | 5.58E-05    | 1.27E-06 | 1           | 1.40E-03 |
| phe.Fasting_rs16833551 | S5 | MYO1B | rs75506779  | S5  | TMCO3       | 3.31E-11 | 0.00135031 | 4.65E-08    | 1.17E-05 | 1           | 9.24E-03 |
| phe.Fasting_rs16833551 | S5 | MYO1B | rs75758702  | S24 | NA          | 8.46E-17 | 3.45E-09   | 3.69E-13    | 2.34E-11 | 0.000953298 | 8.15E-08 |
| phe.Fasting_rs16833551 | S5 | MYO1B | rs75949566  | S5  | TMEM64      | 3.05E-07 | 1          | 0.000210234 | 2.50E-06 | 1           | 2.50E-03 |
| phe.Fasting_rs16833551 | S5 | MYO1B | rs76146702  | S5  | PHC3        | 8.43E-07 | 1          | 0.000520038 | 1.33E-10 | 0.0054196   | 4.00E-07 |
| phe.Fasting_rs16833551 | S5 | MYO1B | rs7615039   | S8  | PHC3        | 7.40E-07 | 1          | 0.000464258 | 3.16E-10 | 0.0128551   | 8.49E-07 |
| phe.Fasting_rs16833551 | S5 | MYO1B | rs7638400   | S7  | PHC3        | 8.15E-07 | 1          | 0.000506657 | 2.10E-10 | 0.0085648   | 5.91E-07 |
| phe.Fasting_rs16833551 | S5 | MYO1B | rs76737663  | S1  | LOC654841   | 1.60E-15 | 6.55E-08   | 4.60E-12    | 1.57E-09 | 0.0637131   | 3.54E-06 |
| phe.Fasting_rs16833551 | S5 | MYO1B | rs77444916  | S23 | LOC642366   | 2.08E-16 | 8.50E-09   | 7.15E-13    | 2.73E-14 | 1.11E-06    | 2.06E-10 |
| phe.Fasting_rs16833551 | S5 | MYO1B | rs77798597  | S7  | KPNA3       | 3.52E-15 | 1.44E-07   | 9.50E-12    | 1.60E-14 | 6.50E-07    | 1.34E-10 |
| phe.Fasting_rs16833551 | S5 | MYO1B | rs78516788  | S8  | SLC38A1     | 6.21E-06 | 1          | 0.00301739  | 4.51E-10 | 0.0183758   | 1.18E-06 |
| phe.Fasting_rs16833551 | S5 | MYO1B | rs78736524  | S5  | KPNA3       | 3.52E-15 | 1.44E-07   | 9.50E-12    | 1.67E-14 | 6.81E-07    | 1.39E-10 |
| phe.Fasting_rs16833551 | S5 | MYO1B | rs78990344  | S2  | LOC1005063  | 3.09E-07 | 1          | 0.000212884 | 1.88E-06 | 1           | 1.96E-03 |
| phe.Fasting_rs16833551 | S5 | MYO1B | rs79389383  | S8  | PHC3        | 8.31E-07 | 1          | 0.000514116 | 2.11E-10 | 0.00860569  | 5.94E-07 |
| phe.Fasting_rs16833551 | S5 | MYO1B | rs79517926  | S15 | "DIAPH1,LOC | 1.65E-07 | 1          | 0.000119391 | 6.67E-12 | 0.000271622 | 2.57E-08 |
| phe.Fasting_rs16833551 | S5 | MYO1B | rs79518241  | S6  | PHC3        | 8.15E-07 | 1          | 0.000506657 | 2.10E-10 | 0.0085648   | 5.91E-07 |
| phe.Fasting_rs16833551 | S5 | MYO1B | rs79781495  | S8  | KPNA3       | 3.52E-15 | 1.44E-07   | 9.50E-12    | 1.60E-14 | 6.50E-07    | 1.34E-10 |
| phe.Fasting_rs16833551 | S5 | MYO1B | rs80258830  | S24 | LOC642366   | 2.08E-16 | 8.50E-09   | 7.15E-13    | 2.73E-14 | 1.11E-06    | 2.06E-10 |
| phe.Fasting_rs16833551 | S5 | MYO1B | rs80332465  | S5  | KPNA3       | 3.73E-15 | 1.52E-07   | 1.00E-11    | 1.71E-14 | 6.98E-07    | 1.41E-10 |
| phe.Fasting_rs16833551 | S5 | MYO1B | rs80334773  | S5  | KPNA3       | 3.73E-15 | 1.52E-07   | 1.00E-11    | 1.71E-14 | 6.98E-07    | 1.41E-10 |
| phe.Fasting_rs16833579 | S8 | MYO1B | rs111576333 | S5  | TMEM64      | 1.17E-16 | 4.79E-09   | 4.85E-13    | 1.13E-05 | 1           | 9.01E-03 |
| phe.Fasting_rs16833579 | S8 | MYO1B | rs112027720 | S7  | DIAPH1      | 2.26E-07 | 1.00E+00   | 1.60E-04    | 9.73E-12 | 0.000395959 | 3.61E-08 |
| phe.Fasting_rs16833579 | S8 | MYO1B | rs113219478 | S7  | DIAPH1      | 2.26E-07 | 1          | 0.000159719 | 9.73E-12 | 0.000395959 | 3.61E-08 |
| phe.Fasting_rs16833579 | S8 | MYO1B | rs113357907 | S24 | ISL1        | 2.24E-17 | 9.16E-10   | 1.45E-13    | 6.99E-15 | 2.84E-07    | 6.24E-11 |

|                        |    |       |                |               |          |            |          |          |             |          |
|------------------------|----|-------|----------------|---------------|----------|------------|----------|----------|-------------|----------|
| phe.Fasting_rs16833579 | S8 | MYO1B | rs115787552S5  | KPNA3         | 1.07E-15 | 4.36E-08   | 3.15E-12 | 2.39E-06 | 1           | 2.41E-03 |
| phe.Fasting_rs16833579 | S8 | MYO1B | rs115888477S8  | NA            | 7.46E-15 | 3.05E-07   | 1.92E-11 | 5.69E-07 | 1           | 6.74E-04 |
| phe.Fasting_rs16833579 | S8 | MYO1B | rs116011837S9  | BRD2          | 1.84E-11 | 0.00075159 | 2.77E-08 | 2.46E-09 | 0.100114    | 5.30E-06 |
| phe.Fasting_rs16833579 | S8 | MYO1B | rs116079984S8  | KPNA3         | 1.07E-15 | 4.36E-08   | 3.15E-12 | 3.02E-06 | 1           | 2.95E-03 |
| phe.Fasting_rs16833579 | S8 | MYO1B | rs116120727S9  | BRD2          | 1.84E-11 | 7.52E-04   | 2.77E-08 | 2.46E-09 | 0.100114    | 5.30E-06 |
| phe.Fasting_rs16833579 | S8 | MYO1B | rs116279995S20 | "PCDHGA4,PI   | 3.89E-08 | 1.00E+00   | 3.27E-05 | 4.41E-12 | 0.000179328 | 1.76E-08 |
| phe.Fasting_rs16833579 | S8 | MYO1B | rs116406581S2  | NA            | 3.18E-09 | 1.30E-01   | 3.23E-06 | 9.51E-06 | 1           | 7.84E-03 |
| phe.Fasting_rs16833579 | S8 | MYO1B | rs11989304 S4  | TMEM64        | 1.17E-16 | 4.79E-09   | 4.85E-13 | 1.11E-05 | 1           | 8.90E-03 |
| phe.Fasting_rs16833579 | S8 | MYO1B | rs13400525 S8  | MFF           | 2.10E-16 | 8.59E-09   | 7.21E-13 | 8.33E-11 | 0.0033917   | 2.59E-07 |
| phe.Fasting_rs16833579 | S8 | MYO1B | rs138090701S5  | HDAC3         | 5.81E-06 | 1.00E+00   | 2.85E-03 | 9.85E-12 | 0.000400893 | 3.65E-08 |
| phe.Fasting_rs16833579 | S8 | MYO1B | rs138136869S7  | DIAPH1        | 5.93E-08 | 1.00E+00   | 4.77E-05 | 2.38E-12 | 9.69E-05    | 1.02E-08 |
| phe.Fasting_rs16833579 | S8 | MYO1B | rs138457103S10 | DIAPH1        | 1.48E-07 | 1.00E+00   | 1.08E-04 | 1.02E-11 | 0.000416954 | 3.79E-08 |
| phe.Fasting_rs16833579 | S8 | MYO1B | rs138487229S11 | DIAPH1        | 2.26E-07 | 1.00E+00   | 1.60E-04 | 9.73E-12 | 0.000395959 | 3.61E-08 |
| phe.Fasting_rs16833579 | S8 | MYO1B | rs138738950S8  | "PCDHGB2,PI   | 2.26E-07 | 1.00E+00   | 1.60E-04 | 9.75E-12 | 0.000396821 | 3.62E-08 |
| phe.Fasting_rs16833579 | S8 | MYO1B | rs139297927S8  | DIAPH1        | 2.26E-07 | 1.00E+00   | 1.60E-04 | 9.73E-12 | 0.000395959 | 3.61E-08 |
| phe.Fasting_rs16833579 | S8 | MYO1B | rs139337303S8  | DIAPH1        | 2.26E-07 | 1          | 1.60E-04 | 9.73E-12 | 0.000395959 | 3.61E-08 |
| phe.Fasting_rs16833579 | S8 | MYO1B | rs139403963S8  | DIAPH1        | 5.93E-08 | 1          | 4.77E-05 | 2.38E-12 | 9.69E-05    | 1.02E-08 |
| phe.Fasting_rs16833579 | S8 | MYO1B | rs139621309S18 | "LOC100505056 | 2.26E-07 | 1          | 1.60E-04 | 9.73E-12 | 0.000395959 | 3.61E-08 |
| phe.Fasting_rs16833579 | S8 | MYO1B | rs139828110S8  | DIAPH1        | 5.93E-08 | 1          | 4.77E-05 | 2.38E-12 | 9.69E-05    | 1.02E-08 |
| phe.Fasting_rs16833579 | S8 | MYO1B | rs140070363S8  | DIAPH1        | 2.26E-07 | 1          | 1.60E-04 | 9.73E-12 | 0.000395959 | 3.61E-08 |
| phe.Fasting_rs16833579 | S8 | MYO1B | rs140524622S7  | MRPL10        | 3.87E-17 | 1.58E-09   | 2.08E-13 | 4.08E-06 | 1           | 3.83E-03 |
| phe.Fasting_rs16833579 | S8 | MYO1B | rs140644750S13 | DIAPH1        | 2.26E-07 | 1          | 1.60E-04 | 9.73E-12 | 0.000395959 | 3.61E-08 |
| phe.Fasting_rs16833579 | S8 | MYO1B | rs141022544S8  | DIAPH1        | 2.26E-07 | 1          | 1.60E-04 | 9.73E-12 | 0.000395959 | 3.61E-08 |
| phe.Fasting_rs16833579 | S8 | MYO1B | rs141525984S5  | DIAPH1        | 2.26E-07 | 1          | 1.60E-04 | 9.73E-12 | 0.000395959 | 3.61E-08 |
| phe.Fasting_rs16833579 | S8 | MYO1B | rs141692339S3  | "PCDHGA6,PI   | 4.54E-08 | 1          | 3.75E-05 | 6.37E-12 | 0.000259196 | 2.46E-08 |
| phe.Fasting_rs16833579 | S8 | MYO1B | rs141926074S8  | ATE1          | 6.12E-18 | 2.50E-10   | 7.50E-14 | 5.85E-12 | 0.000238277 | 2.28E-08 |
| phe.Fasting_rs16833579 | S8 | MYO1B | rs142480565S8  | DIAPH1        | 2.26E-07 | 1          | 1.60E-04 | 9.73E-12 | 0.000395959 | 3.61E-08 |
| phe.Fasting_rs16833579 | S8 | MYO1B | rs142718558S7  | "DIAPH1,LOC   | 2.26E-07 | 1          | 1.60E-04 | 9.73E-12 | 0.000395959 | 3.61E-08 |
| phe.Fasting_rs16833579 | S8 | MYO1B | rs142789100S8  | DIAPH1        | 5.93E-08 | 1          | 4.77E-05 | 2.38E-12 | 9.69E-05    | 1.02E-08 |
| phe.Fasting_rs16833579 | S8 | MYO1B | rs142812798S7  | DIAPH1        | 5.93E-08 | 1          | 4.77E-05 | 2.38E-12 | 9.69E-05    | 1.02E-08 |
| phe.Fasting_rs16833579 | S8 | MYO1B | rs143377827S13 | "DIAPH1,LOC   | 5.15E-08 | 1          | 4.21E-05 | 1.79E-12 | 7.29E-05    | 7.85E-09 |
| phe.Fasting_rs16833579 | S8 | MYO1B | rs143691978S11 | DIAPH1        | 5.93E-08 | 1          | 4.77E-05 | 2.55E-12 | 0.00010399  | 1.10E-08 |
| phe.Fasting_rs16833579 | S8 | MYO1B | rs144081334S11 | DIAPH1        | 5.93E-08 | 1          | 4.77E-05 | 2.55E-12 | 0.00010399  | 1.10E-08 |
| phe.Fasting_rs16833579 | S8 | MYO1B | rs144613910S8  | DIAPH1        | 2.26E-07 | 1          | 1.60E-04 | 9.73E-12 | 0.000395959 | 3.61E-08 |
| phe.Fasting_rs16833579 | S8 | MYO1B | rs145027704S11 | DIAPH1        | 5.93E-08 | 1          | 4.77E-05 | 2.55E-12 | 0.00010399  | 1.10E-08 |
| phe.Fasting_rs16833579 | S8 | MYO1B | rs146220673S7  | DIAPH1        | 2.26E-07 | 1          | 1.60E-04 | 9.73E-12 | 0.000395959 | 3.61E-08 |
| phe.Fasting_rs16833579 | S8 | MYO1B | rs146622060S13 | DIAPH1        | 5.93E-08 | 1          | 4.77E-05 | 2.55E-12 | 0.00010399  | 1.10E-08 |
| phe.Fasting_rs16833579 | S8 | MYO1B | rs146815317S5  | KPNA3         | 1.07E-15 | 4.36E-08   | 3.15E-12 | 2.39E-06 | 1           | 2.41E-03 |
| phe.Fasting_rs16833579 | S8 | MYO1B | rs146878162S7  | DIAPH1        | 2.26E-07 | 1          | 1.60E-04 | 9.73E-12 | 0.000395959 | 3.61E-08 |
| phe.Fasting_rs16833579 | S8 | MYO1B | rs147314451S8  | DIAPH1        | 2.26E-07 | 1          | 1.60E-04 | 9.73E-12 | 0.000395959 | 3.61E-08 |

|                        |    |       |                |             |          |          |             |          |             |          |
|------------------------|----|-------|----------------|-------------|----------|----------|-------------|----------|-------------|----------|
| phe.Fasting_rs16833579 | S8 | MYO1B | rs147417996S7  | DIAPH1      | 5.93E-08 | 1        | 4.77E-05    | 2.55E-12 | 0.00010399  | 1.10E-08 |
| phe.Fasting_rs16833579 | S8 | MYO1B | rs147506725S21 | "PCDHGA1,Pi | 3.89E-08 | 1        | 3.27E-05    | 4.41E-12 | 0.000179328 | 1.76E-08 |
| phe.Fasting_rs16833579 | S8 | MYO1B | rs147646948S7  | "LOC1005056 | 2.26E-07 | 1        | 1.60E-04    | 9.73E-12 | 0.000395959 | 3.61E-08 |
| phe.Fasting_rs16833579 | S8 | MYO1B | rs147677041S8  | DIAPH1      | 5.93E-08 | 1        | 4.77E-05    | 2.38E-12 | 9.69E-05    | 1.02E-08 |
| phe.Fasting_rs16833579 | S8 | MYO1B | rs148116628S7  | DIAPH1      | 2.26E-07 | 1        | 1.60E-04    | 9.73E-12 | 0.000395959 | 3.61E-08 |
| phe.Fasting_rs16833579 | S8 | MYO1B | rs148423011S7  | DIAPH1      | 2.26E-07 | 1        | 1.60E-04    | 9.73E-12 | 0.000395959 | 3.61E-08 |
| phe.Fasting_rs16833579 | S8 | MYO1B | rs149019627S8  | DIAPH1      | 5.93E-08 | 1        | 4.77E-05    | 2.38E-12 | 9.69E-05    | 1.02E-08 |
| phe.Fasting_rs16833579 | S8 | MYO1B | rs149075406S8  | DIAPH1      | 2.26E-07 | 1        | 1.60E-04    | 9.73E-12 | 0.000395959 | 3.61E-08 |
| phe.Fasting_rs16833579 | S8 | MYO1B | rs149334783S8  | DIAPH1      | 2.26E-07 | 1        | 1.60E-04    | 9.73E-12 | 0.000395959 | 3.61E-08 |
| phe.Fasting_rs16833579 | S8 | MYO1B | rs149553852S21 | "PCDHGA10,I | 3.89E-08 | 1        | 3.27E-05    | 4.41E-12 | 0.000179328 | 1.76E-08 |
| phe.Fasting_rs16833579 | S8 | MYO1B | rs149716949S5  | DIAPH1      | 2.41E-08 | 0.984313 | 2.10E-05    | 1.75E-12 | 7.12E-05    | 7.69E-09 |
| phe.Fasting_rs16833579 | S8 | MYO1B | rs149791570S5  | DIAPH1      | 5.93E-08 | 1        | 4.77E-05    | 2.38E-12 | 9.69E-05    | 1.02E-08 |
| phe.Fasting_rs16833579 | S8 | MYO1B | rs150117838S8  | KPNA3       | 1.07E-15 | 4.36E-08 | 3.15E-12    | 2.39E-06 | 1           | 2.40E-03 |
| phe.Fasting_rs16833579 | S8 | MYO1B | rs150452206S13 | "DIAPH1,LOC | 2.26E-07 | 1        | 1.60E-04    | 9.73E-12 | 0.000395959 | 3.61E-08 |
| phe.Fasting_rs16833579 | S8 | MYO1B | rs150675915S7  | DIAPH1      | 2.26E-07 | 1        | 1.60E-04    | 9.73E-12 | 0.000395959 | 3.61E-08 |
| phe.Fasting_rs16833579 | S8 | MYO1B | rs150765570S7  | DIAPH1      | 2.26E-07 | 1        | 1.60E-04    | 9.73E-12 | 0.000395959 | 3.61E-08 |
| phe.Fasting_rs16833579 | S8 | MYO1B | rs150992994S11 | "PCDHGAS,Pi | 2.39E-07 | 1        | 1.67E-04    | 9.25E-12 | 0.000376692 | 3.45E-08 |
| phe.Fasting_rs16833579 | S8 | MYO1B | rs151204700S8  | DIAPH1      | 2.26E-07 | 1        | 1.60E-04    | 9.73E-12 | 0.000395959 | 3.61E-08 |
| phe.Fasting_rs16833579 | S8 | MYO1B | rs151330468S8  | DIAPH1      | 5.93E-08 | 1        | 4.77E-05    | 2.55E-12 | 0.00010399  | 1.10E-08 |
| phe.Fasting_rs16833579 | S8 | MYO1B | rs180772028S8  | "DIAPH1,LOC | 2.26E-07 | 1        | 1.60E-04    | 9.73E-12 | 0.000395959 | 3.61E-08 |
| phe.Fasting_rs16833579 | S8 | MYO1B | rs181224861S7  | DIAPH1      | 2.26E-07 | 1        | 1.60E-04    | 9.73E-12 | 0.000395959 | 3.61E-08 |
| phe.Fasting_rs16833579 | S8 | MYO1B | rs181247960S21 | "PCDHGA9,Pi | 3.89E-08 | 1        | 3.27E-05    | 4.41E-12 | 0.000179328 | 1.76E-08 |
| phe.Fasting_rs16833579 | S8 | MYO1B | rs181824655S21 | "PCDHGB6,Pi | 3.89E-08 | 1        | 3.27E-05    | 4.41E-12 | 0.000179328 | 1.76E-08 |
| phe.Fasting_rs16833579 | S8 | MYO1B | rs182714699S8  | DIAPH1      | 2.26E-07 | 1        | 1.60E-04    | 9.73E-12 | 0.000395959 | 3.61E-08 |
| phe.Fasting_rs16833579 | S8 | MYO1B | rs182958142S8  | DIAPH1      | 3.18E-07 | 1        | 2.19E-04    | 9.48E-13 | 3.86E-05    | 4.50E-09 |
| phe.Fasting_rs16833579 | S8 | MYO1B | rs182965141S8  | DIAPH1      | 7.39E-08 | 1        | 5.81E-05    | 7.05E-10 | 0.028681    | 1.75E-06 |
| phe.Fasting_rs16833579 | S8 | MYO1B | rs183597049S7  | DIAPH1      | 2.26E-07 | 1.00E+00 | 1.60E-04    | 9.73E-12 | 0.000395959 | 3.61E-08 |
| phe.Fasting_rs16833579 | S8 | MYO1B | rs183980988S2  | NA          | 2.26E-07 | 1.00E+00 | 1.60E-04    | 9.73E-12 | 0.000395959 | 3.61E-08 |
| phe.Fasting_rs16833579 | S8 | MYO1B | rs184233232S7  | DIAPH1      | 2.26E-07 | 1        | 0.000159719 | 9.73E-12 | 0.000395959 | 3.61E-08 |
| phe.Fasting_rs16833579 | S8 | MYO1B | rs184509477S13 | "PCDHGB4,Pi | 2.26E-07 | 1.00E+00 | 1.60E-04    | 9.73E-12 | 0.000395959 | 3.61E-08 |
| phe.Fasting_rs16833579 | S8 | MYO1B | rs185069296S15 | "LOC1005056 | 2.26E-07 | 1        | 0.000159719 | 9.73E-12 | 0.000395959 | 3.61E-08 |
| phe.Fasting_rs16833579 | S8 | MYO1B | rs185502834S8  | DIAPH1      | 5.93E-08 | 1        | 4.77E-05    | 2.38E-12 | 9.69E-05    | 1.02E-08 |
| phe.Fasting_rs16833579 | S8 | MYO1B | rs185759881S7  | DIAPH1      | 2.26E-07 | 1        | 0.000159719 | 9.73E-12 | 0.000395959 | 3.61E-08 |
| phe.Fasting_rs16833579 | S8 | MYO1B | rs186288044S21 | "PCDHGB4,Pi | 3.89E-08 | 1        | 3.27E-05    | 4.41E-12 | 0.000179328 | 1.76E-08 |
| phe.Fasting_rs16833579 | S8 | MYO1B | rs187000011S11 | DIAPH1      | 2.26E-07 | 1        | 0.000159719 | 9.73E-12 | 0.000395959 | 3.61E-08 |
| phe.Fasting_rs16833579 | S8 | MYO1B | rs188981295S5  | "RPS27AP10, | 2.26E-07 | 1        | 0.000159719 | 9.73E-12 | 0.000395959 | 3.61E-08 |
| phe.Fasting_rs16833579 | S8 | MYO1B | rs190559574S7  | DIAPH1      | 5.93E-08 | 1.00E+00 | 4.77E-05    | 2.38E-12 | 9.69E-05    | 1.02E-08 |
| phe.Fasting_rs16833579 | S8 | MYO1B | rs191544043S8  | DIAPH1      | 2.26E-07 | 1.00E+00 | 1.60E-04    | 9.73E-12 | 0.000395959 | 3.61E-08 |
| phe.Fasting_rs16833579 | S8 | MYO1B | rs191766712S7  | DIAPH1      | 2.26E-07 | 1.00E+00 | 1.60E-04    | 9.73E-12 | 0.000395959 | 3.61E-08 |
| phe.Fasting_rs16833579 | S8 | MYO1B | rs192690040S7  | DIAPH1      | 2.26E-07 | 1.00E+00 | 1.60E-04    | 9.73E-12 | 0.000395959 | 3.61E-08 |

|                        |    |       |                |             |          |             |          |          |             |          |
|------------------------|----|-------|----------------|-------------|----------|-------------|----------|----------|-------------|----------|
| phe.Fasting_rs16833579 | S8 | MYO1B | rs192765219S7  | DIAPH1      | 2.26E-07 | 1.00E+00    | 1.60E-04 | 9.73E-12 | 0.000395959 | 3.61E-08 |
| phe.Fasting_rs16833579 | S8 | MYO1B | rs192770525S7  | DIAPH1      | 2.26E-07 | 1.00E+00    | 1.60E-04 | 9.73E-12 | 0.000395959 | 3.61E-08 |
| phe.Fasting_rs16833579 | S8 | MYO1B | rs35990401 S7  | DIAPH1      | 2.36E-07 | 1.00E+00    | 1.66E-04 | 3.22E-12 | 0.000131266 | 1.36E-08 |
| phe.Fasting_rs16833579 | S8 | MYO1B | rs55900860 S7  | DIAPH1      | 5.93E-08 | 1           | 4.77E-05 | 2.38E-12 | 9.69E-05    | 1.02E-08 |
| phe.Fasting_rs16833579 | S8 | MYO1B | rs57503635 S3  | NA          | 2.34E-16 | 9.55E-09    | 7.95E-13 | 1.24E-06 | 1           | 1.37E-03 |
| phe.Fasting_rs16833579 | S8 | MYO1B | rs6881310 S23  | ISL1        | 1.58E-16 | 6.46E-09    | 6.03E-13 | 2.60E-12 | 0.000105734 | 1.11E-08 |
| phe.Fasting_rs16833579 | S8 | MYO1B | rs7004597 S8   | NA          | 7.92E-10 | 0.0323275   | 8.78E-07 | 9.42E-06 | 1           | 7.77E-03 |
| phe.Fasting_rs16833579 | S8 | MYO1B | rs73619637 S8  | NA          | 3.32E-16 | 1.36E-08    | 1.10E-12 | 1.90E-11 | 0.000773524 | 6.76E-08 |
| phe.Fasting_rs16833579 | S8 | MYO1B | rs75506779 S5  | TMCO3       | 1.12E-11 | 0.000458606 | 1.77E-08 | 8.51E-06 | 1           | 7.15E-03 |
| phe.Fasting_rs16833579 | S8 | MYO1B | rs75758702 S24 | NA          | 2.78E-07 | 1           | 1.93E-04 | 5.21E-12 | 0.000211923 | 2.05E-08 |
| phe.Fasting_rs16833579 | S8 | MYO1B | rs76737663 S1  | LOC654841   | 2.30E-16 | 9.38E-09    | 7.81E-13 | 8.90E-10 | 0.0362463   | 2.14E-06 |
| phe.Fasting_rs16833579 | S8 | MYO1B | rs77444916 S23 | LOC642366   | 5.20E-17 | 2.12E-09    | 2.55E-13 | 6.64E-15 | 2.70E-07    | 5.95E-11 |
| phe.Fasting_rs16833579 | S8 | MYO1B | rs77798597 S7  | KPNA3       | 1.07E-15 | 4.36E-08    | 3.15E-12 | 2.39E-06 | 1           | 2.40E-03 |
| phe.Fasting_rs16833579 | S8 | MYO1B | rs78736524 S5  | KPNA3       | 1.07E-15 | 4.36E-08    | 3.15E-12 | 2.39E-06 | 1           | 2.41E-03 |
| phe.Fasting_rs16833579 | S8 | MYO1B | rs78990344 S2  | LOC1005063  | 1.17E-16 | 4.79E-09    | 4.85E-13 | 1.11E-05 | 1           | 8.90E-03 |
| phe.Fasting_rs16833579 | S8 | MYO1B | rs79517926 S15 | "DIAPH1,LOC | 7.74E-08 | 1           | 6.04E-05 | 9.71E-13 | 3.95E-05    | 4.60E-09 |
| phe.Fasting_rs16833579 | S8 | MYO1B | rs79781495 S8  | KPNA3       | 1.07E-15 | 4.36E-08    | 3.15E-12 | 2.39E-06 | 1           | 2.40E-03 |
| phe.Fasting_rs16833579 | S8 | MYO1B | rs80258830 S24 | LOC642366   | 5.20E-17 | 2.12E-09    | 2.55E-13 | 6.64E-15 | 2.70E-07    | 5.95E-11 |
| phe.Fasting_rs16833579 | S8 | MYO1B | rs80332465 S5  | KPNA3       | 1.13E-15 | 4.63E-08    | 3.32E-12 | 2.47E-06 | 1           | 2.48E-03 |
| phe.Fasting_rs16833579 | S8 | MYO1B | rs80334773 S5  | KPNA3       | 1.13E-15 | 4.63E-08    | 3.32E-12 | 2.47E-06 | 1           | 2.48E-03 |
| phe.Fasting_rs16854875 | S2 | NA    | rs111576333S5  | TMEM64      | 1.62E-08 | 0.663422    | 1.46E-05 | 2.59E-09 | 0.10555     | 5.57E-06 |
| phe.Fasting_rs16854875 | S2 | NA    | rs112091318S5  | TMEM64      | 4.96E-09 | 0.202517    | 4.85E-06 | 3.77E-08 | 1           | 5.94E-05 |
| phe.Fasting_rs16854875 | S2 | NA    | rs112348319S8  | SPTLC1      | 1.43E-05 | 1           | 6.22E-03 | 3.41E-10 | 0.0138954   | 9.07E-07 |
| phe.Fasting_rs16854875 | S2 | NA    | rs112608164S8  | SPTLC1      | 1.43E-05 | 1           | 6.22E-03 | 3.41E-10 | 0.0138954   | 9.07E-07 |
| phe.Fasting_rs16854875 | S2 | NA    | rs113568654S12 | SPTLC1      | 1.37E-05 | 1           | 5.99E-03 | 5.56E-09 | 0.226434    | 1.10E-05 |
| phe.Fasting_rs16854875 | S2 | NA    | rs115083290S19 | NA          | 7.02E-08 | 1           | 5.56E-05 | 7.43E-07 | 1           | 8.61E-04 |
| phe.Fasting_rs16854875 | S2 | NA    | rs115305957S23 | NA          | 8.07E-07 | 1           | 5.02E-04 | 8.50E-06 | 1           | 7.15E-03 |
| phe.Fasting_rs16854875 | S2 | NA    | rs115752779S19 | NA          | 7.02E-08 | 1           | 5.56E-05 | 7.43E-07 | 1           | 8.61E-04 |
| phe.Fasting_rs16854875 | S2 | NA    | rs115888477S8  | NA          | 1.06E-06 | 1           | 6.39E-04 | 8.24E-11 | 0.00335529  | 2.56E-07 |
| phe.Fasting_rs16854875 | S2 | NA    | rs116011837S9  | BRD2        | 1.98E-13 | 8.09E-06    | 4.34E-10 | 5.72E-11 | 0.00233027  | 1.83E-07 |
| phe.Fasting_rs16854875 | S2 | NA    | rs116120727S9  | BRD2        | 1.98E-13 | 8.09E-06    | 4.34E-10 | 5.72E-11 | 0.00233027  | 1.83E-07 |
| phe.Fasting_rs16854875 | S2 | NA    | rs116548615S8  | TMEM45B     | 4.06E-19 | 1.66E-11    | 2.40E-14 | 1.01E-09 | 0.0409125   | 2.39E-06 |
| phe.Fasting_rs16854875 | S2 | NA    | rs11989304 S4  | TMEM64      | 1.62E-08 | 0.663422    | 1.46E-05 | 2.60E-09 | 0.105653    | 5.57E-06 |
| phe.Fasting_rs16854875 | S2 | NA    | rs140524622S7  | MRPL10      | 8.82E-06 | 1           | 4.10E-03 | 8.86E-06 | 1           | 7.39E-03 |
| phe.Fasting_rs16854875 | S2 | NA    | rs141926074S8  | ATE1        | 9.49E-20 | 3.87E-12    | 2.23E-14 | 1.78E-09 | 0.0726252   | 3.98E-06 |
| phe.Fasting_rs16854875 | S2 | NA    | rs74627895 S8  | TMEM64      | 4.96E-09 | 0.202517    | 4.85E-06 | 1.01E-05 | 1           | 8.23E-03 |
| phe.Fasting_rs16854875 | S2 | NA    | rs74701059 S24 | C17orf102   | 8.67E-07 | 1           | 5.32E-04 | 9.87E-06 | 1           | 8.06E-03 |
| phe.Fasting_rs16854875 | S2 | NA    | rs75949566 S5  | TMEM64      | 1.78E-08 | 0.727967    | 1.58E-05 | 3.28E-08 | 1           | 5.25E-05 |
| phe.Fasting_rs16854875 | S2 | NA    | rs76542405 S5  | SPTLC1      | 1.43E-05 | 1           | 6.22E-03 | 3.41E-10 | 0.0138954   | 9.07E-07 |
| phe.Fasting_rs16854875 | S2 | NA    | rs77523818 S7  | SPTLC1      | 1.43E-05 | 1           | 6.22E-03 | 3.41E-10 | 0.0138954   | 9.07E-07 |

|                        |    |           |             |     |             |          |           |          |          |             |          |
|------------------------|----|-----------|-------------|-----|-------------|----------|-----------|----------|----------|-------------|----------|
| phe.Fasting_rs16854875 | S2 | NA        | rs77845645  | S21 | NA          | 5.59E-06 | 1         | 2.75E-03 | 3.88E-12 | 0.000157909 | 1.61E-08 |
| phe.Fasting_rs16854875 | S2 | NA        | rs78990344  | S2  | LOC10050631 | 1.62E-08 | 0.663422  | 1.46E-05 | 2.60E-09 | 0.105653    | 5.57E-06 |
| phe.Fasting_rs16894241 | S4 | HIST1H2BK | rs114334325 | S7  | AP3M2       | 9.74E-16 | 3.98E-08  | 2.90E-12 | 6.64E-07 | 1           | 7.78E-04 |
| phe.Fasting_rs16894241 | S4 | HIST1H2BK | rs114394395 | S7  | AP3M2       | 1.04E-15 | 4.26E-08  | 3.08E-12 | 6.64E-07 | 1           | 7.78E-04 |
| phe.Fasting_rs16894241 | S4 | HIST1H2BK | rs114565620 | S8  | RCL1        | 1.14E-17 | 4.64E-10  | 1.02E-13 | 8.75E-16 | 3.56E-08    | 1.16E-11 |
| phe.Fasting_rs16894241 | S4 | HIST1H2BK | rs115305957 | S23 | NA          | 1.12E-17 | 4.58E-10  | 1.02E-13 | 1.11E-09 | 0.0452685   | 2.62E-06 |
| phe.Fasting_rs16894241 | S4 | HIST1H2BK | rs115787552 | S5  | KPNA3       | 2.62E-16 | 1.07E-08  | 8.83E-13 | 1.86E-11 | 0.000758335 | 6.63E-08 |
| phe.Fasting_rs16894241 | S4 | HIST1H2BK | rs115888477 | S8  | NA          | 2.09E-15 | 8.54E-08  | 5.93E-12 | 4.02E-09 | 0.163698    | 8.25E-06 |
| phe.Fasting_rs16894241 | S4 | HIST1H2BK | rs116011837 | S9  | BRD2        | 1.99E-17 | 8.12E-10  | 1.42E-13 | 3.43E-08 | 1           | 5.46E-05 |
| phe.Fasting_rs16894241 | S4 | HIST1H2BK | rs116079984 | S8  | KPNA3       | 2.62E-16 | 1.07E-08  | 8.83E-13 | 2.30E-11 | 0.000937424 | 8.01E-08 |
| phe.Fasting_rs16894241 | S4 | HIST1H2BK | rs116120727 | S9  | BRD2        | 1.99E-17 | 8.12E-10  | 1.42E-13 | 3.43E-08 | 1           | 5.46E-05 |
| phe.Fasting_rs16894241 | S4 | HIST1H2BK | rs116406581 | S2  | NA          | 3.77E-15 | 1.54E-07  | 1.01E-11 | 4.70E-07 | 1           | 5.64E-04 |
| phe.Fasting_rs16894241 | S4 | HIST1H2BK | rs116696844 | S3  | AP3M2       | 2.02E-15 | 8.23E-08  | 5.72E-12 | 6.64E-07 | 1           | 7.78E-04 |
| phe.Fasting_rs16894241 | S4 | HIST1H2BK | rs140524622 | S7  | MRPL10      | 9.53E-18 | 3.89E-10  | 9.45E-14 | 2.09E-07 | 1           | 2.75E-04 |
| phe.Fasting_rs16894241 | S4 | HIST1H2BK | rs141926074 | S8  | ATE1        | 4.96E-18 | 2.03E-10  | 6.81E-14 | 4.37E-06 | 1           | 4.08E-03 |
| phe.Fasting_rs16894241 | S4 | HIST1H2BK | rs146815317 | S5  | KPNA3       | 2.62E-16 | 1.07E-08  | 8.83E-13 | 1.86E-11 | 0.000758335 | 6.63E-08 |
| phe.Fasting_rs16894241 | S4 | HIST1H2BK | rs150117838 | S8  | KPNA3       | 2.62E-16 | 1.07E-08  | 8.83E-13 | 1.77E-11 | 0.000720971 | 6.32E-08 |
| phe.Fasting_rs16894241 | S4 | HIST1H2BK | rs57503635  | S3  | NA          | 7.08E-08 | 1         | 5.60E-05 | 1.50E-06 | 1           | 1.62E-03 |
| phe.Fasting_rs16894241 | S4 | HIST1H2BK | rs7004597   | S8  | NA          | 9.74E-16 | 3.98E-08  | 2.90E-12 | 4.39E-07 | 1           | 5.31E-04 |
| phe.Fasting_rs16894241 | S4 | HIST1H2BK | rs73392640  | S8  | POLR3B      | 8.03E-07 | 1         | 4.99E-04 | 2.72E-07 | 1           | 3.47E-04 |
| phe.Fasting_rs16894241 | S4 | HIST1H2BK | rs73619637  | S8  | NA          | 6.48E-06 | 1         | 3.14E-03 | 2.31E-08 | 0.939672    | 3.85E-05 |
| phe.Fasting_rs16894241 | S4 | HIST1H2BK | rs74701059  | S24 | C17orf102   | 1.11E-17 | 4.53E-10  | 1.02E-13 | 1.26E-09 | 0.0513787   | 2.92E-06 |
| phe.Fasting_rs16894241 | S4 | HIST1H2BK | rs75350765  | S5  | RCL1        | 1.14E-17 | 4.64E-10  | 1.02E-13 | 8.75E-16 | 3.56E-08    | 1.16E-11 |
| phe.Fasting_rs16894241 | S4 | HIST1H2BK | rs77798597  | S7  | KPNA3       | 2.62E-16 | 1.07E-08  | 8.83E-13 | 1.77E-11 | 0.000720971 | 6.32E-08 |
| phe.Fasting_rs16894241 | S4 | HIST1H2BK | rs78353402  | S8  | AP3M2       | 9.74E-16 | 3.98E-08  | 2.90E-12 | 6.64E-07 | 1           | 7.78E-04 |
| phe.Fasting_rs16894241 | S4 | HIST1H2BK | rs78516788  | S8  | SLC38A1     | 1.05E-07 | 1         | 8.00E-05 | 1.13E-05 | 1           | 8.98E-03 |
| phe.Fasting_rs16894241 | S4 | HIST1H2BK | rs78736524  | S5  | KPNA3       | 2.62E-16 | 1.07E-08  | 8.83E-13 | 1.86E-11 | 0.000758335 | 6.63E-08 |
| phe.Fasting_rs16894241 | S4 | HIST1H2BK | rs79703349  | S24 | C17orf102   | 1.11E-17 | 4.53E-10  | 1.02E-13 | 1.61E-09 | 0.0654365   | 3.63E-06 |
| phe.Fasting_rs16894241 | S4 | HIST1H2BK | rs79781495  | S8  | KPNA3       | 2.62E-16 | 1.07E-08  | 8.83E-13 | 1.77E-11 | 0.000720971 | 6.32E-08 |
| phe.Fasting_rs16894241 | S4 | HIST1H2BK | rs80332465  | S5  | KPNA3       | 2.79E-16 | 1.14E-08  | 9.36E-13 | 1.87E-11 | 0.000761502 | 6.66E-08 |
| phe.Fasting_rs16894241 | S4 | HIST1H2BK | rs80334773  | S5  | KPNA3       | 2.79E-16 | 1.14E-08  | 9.36E-13 | 1.87E-11 | 0.000761502 | 6.66E-08 |
| phe.Fasting_rs16908547 | S8 | PAG1      | rs113568654 | S12 | SPTLC1      | 1.87E-09 | 0.0763478 | 1.96E-06 | 7.82E-07 | 1           | 9.01E-04 |
| phe.Fasting_rs16908547 | S8 | PAG1      | rs139070959 | S8  | RPN2        | 5.61E-18 | 2.29E-10  | 7.13E-14 | 5.33E-06 | 1           | 4.83E-03 |
| phe.Fasting_rs16908547 | S8 | PAG1      | rs2153597   | S8  | ZNF438      | 2.30E-08 | 0.940443  | 2.01E-05 | 5.18E-07 | 1           | 6.17E-04 |
| phe.Fasting_rs17220629 | S5 | TRAK1     | rs77845645  | S21 | NA          | 3.94E-07 | 1         | 2.65E-04 | 2.35E-07 | 1           | 3.05E-04 |
| phe.Fasting_rs17236830 | S6 | PHC3      | rs111576333 | S5  | TMEM64      | 3.68E-08 | 1         | 3.10E-05 | 2.40E-10 | 0.00976995  | 6.65E-07 |
| phe.Fasting_rs17236830 | S6 | PHC3      | rs112091318 | S5  | TMEM64      | 1.10E-08 | 0.447367  | 1.01E-05 | 3.52E-10 | 0.0143213   | 9.31E-07 |
| phe.Fasting_rs17236830 | S6 | PHC3      | rs114565620 | S8  | RCL1        | 4.23E-19 | 1.73E-11  | 2.42E-14 | 1.20E-06 | 1           | 1.33E-03 |
| phe.Fasting_rs17236830 | S6 | PHC3      | rs115083290 | S19 | NA          | 2.94E-06 | 1         | 1.55E-03 | 4.12E-09 | 0.167892    | 8.44E-06 |
| phe.Fasting_rs17236830 | S6 | PHC3      | rs115752779 | S19 | NA          | 2.94E-06 | 1         | 1.55E-03 | 4.12E-09 | 0.167892    | 8.44E-06 |

|                            |             |                 |             |          |             |             |          |             |          |
|----------------------------|-------------|-----------------|-------------|----------|-------------|-------------|----------|-------------|----------|
| phe.Fasting_rs17236830 S6  | PHC3        | rs116011837 S9  | BRD2        | 5.40E-13 | 2.21E-05    | 1.14E-09    | 2.69E-11 | 0.00109333  | 9.25E-08 |
| phe.Fasting_rs17236830 S6  | PHC3        | rs116120727 S9  | BRD2        | 5.40E-13 | 2.21E-05    | 1.14E-09    | 2.69E-11 | 0.00109333  | 9.25E-08 |
| phe.Fasting_rs17236830 S6  | PHC3        | rs116548615 S8  | TMEM45B     | 9.83E-09 | 0.401532    | 9.19E-06    | 7.91E-10 | 0.0321953   | 1.94E-06 |
| phe.Fasting_rs17236830 S6  | PHC3        | rs11989304 S4   | TMEM64      | 3.68E-08 | 1           | 3.10E-05    | 2.40E-10 | 0.00978442  | 6.66E-07 |
| phe.Fasting_rs17236830 S6  | PHC3        | rs140524622 S7  | MRPL10      | 3.72E-08 | 1           | 3.13E-05    | 2.63E-06 | 1           | 2.62E-03 |
| phe.Fasting_rs17236830 S6  | PHC3        | rs141926074 S8  | ATE1        | 7.68E-07 | 1           | 4.79E-04    | 1.69E-11 | 0.000688316 | 6.06E-08 |
| phe.Fasting_rs17236830 S6  | PHC3        | rs57287019 S5   | CLCN3       | 1.17E-05 | 1           | 5.23E-03    | 5.14E-06 | 1           | 4.68E-03 |
| phe.Fasting_rs17236830 S6  | PHC3        | rs73392640 S8   | POLR3B      | 3.08E-06 | 1           | 0.00161942  | 1.06E-05 | 1           | 8.59E-03 |
| phe.Fasting_rs17236830 S6  | PHC3        | rs74627895 S8   | TMEM64      | 1.10E-08 | 0.447367    | 1.01E-05    | 1.19E-06 | 1           | 1.32E-03 |
| phe.Fasting_rs17236830 S6  | PHC3        | rs75350765 S5   | RCL1        | 4.23E-19 | 1.73E-11    | 2.42E-14    | 1.20E-06 | 1           | 1.33E-03 |
| phe.Fasting_rs17236830 S6  | PHC3        | rs75949566 S5   | TMEM64      | 4.03E-08 | 1.00E+00    | 3.37E-05    | 4.24E-10 | 0.0172657   | 1.11E-06 |
| phe.Fasting_rs17236830 S6  | PHC3        | rs7657672 S8    | CLCN3       | 1.41E-05 | 1.00E+00    | 6.13E-03    | 2.01E-06 | 1           | 2.08E-03 |
| phe.Fasting_rs17236830 S6  | PHC3        | rs77845645 S21  | NA          | 7.52E-08 | 1           | 5.89E-05    | 1.22E-12 | 4.98E-05    | 5.63E-09 |
| phe.Fasting_rs17236830 S6  | PHC3        | rs78990344 S2   | LOC10050631 | 3.68E-08 | 1           | 3.10E-05    | 2.40E-10 | 0.00978442  | 6.66E-07 |
| phe.Fasting_rs1772407 S7   | IFI16       | rs140524622 S7  | MRPL10      | 4.82E-06 | 1           | 0.00240792  | 1.22E-07 | 1           | 1.69E-04 |
| phe.Fasting_rs180772028 S8 | "DIAPH1,LOC | rs111576333 S5  | TMEM64      | 2.37E-06 | 1           | 0.00129547  | 5.87E-14 | 2.39E-06    | 3.99E-10 |
| phe.Fasting_rs180772028 S8 | "DIAPH1,LOC | rs112089881 S8  | ZFAND4      | 2.04E-17 | 8.32E-10    | 1.43E-13    | 1.09E-09 | 0.0445256   | 2.58E-06 |
| phe.Fasting_rs180772028 S8 | "DIAPH1,LOC | rs112091318 S5  | TMEM64      | 7.32E-07 | 1           | 0.000459899 | 3.91E-08 | 1           | 6.13E-05 |
| phe.Fasting_rs180772028 S8 | "DIAPH1,LOC | rs114334325 S7  | AP3M2       | 4.51E-15 | 1.84E-07    | 1.18E-11    | 3.87E-07 | 1           | 4.75E-04 |
| phe.Fasting_rs180772028 S8 | "DIAPH1,LOC | rs114394395 S7  | AP3M2       | 4.81E-15 | 1.97E-07    | 1.25E-11    | 3.87E-07 | 1           | 4.75E-04 |
| phe.Fasting_rs180772028 S8 | "DIAPH1,LOC | rs114565620 S8  | RCL1        | 1.82E-16 | 7.42E-09    | 6.37E-13    | 3.70E-08 | 1           | 5.84E-05 |
| phe.Fasting_rs180772028 S8 | "DIAPH1,LOC | rs115083290 S19 | NA          | 4.38E-16 | 1.79E-08    | 1.40E-12    | 1.42E-08 | 0.576679    | 2.53E-05 |
| phe.Fasting_rs180772028 S8 | "DIAPH1,LOC | rs11524145 S5   | CDK6        | 7.80E-07 | 1           | 4.86E-04    | 7.89E-06 | 1           | 6.69E-03 |
| phe.Fasting_rs180772028 S8 | "DIAPH1,LOC | rs115752779 S19 | NA          | 4.38E-16 | 1.79E-08    | 1.40E-12    | 1.42E-08 | 0.576679    | 2.53E-05 |
| phe.Fasting_rs180772028 S8 | "DIAPH1,LOC | rs115787552 S5  | KPNA3       | 2.97E-15 | 1.21E-07    | 8.14E-12    | 1.18E-13 | 4.80E-06    | 7.06E-10 |
| phe.Fasting_rs180772028 S8 | "DIAPH1,LOC | rs115888477 S8  | NA          | 2.03E-14 | 8.28E-07    | 5.02E-11    | 2.21E-14 | 8.99E-07    | 1.73E-10 |
| phe.Fasting_rs180772028 S8 | "DIAPH1,LOC | rs116011837 S9  | BRD2        | 4.89E-11 | 0.00199774  | 6.62E-08    | 4.07E-14 | 1.66E-06    | 2.85E-10 |
| phe.Fasting_rs180772028 S8 | "DIAPH1,LOC | rs116079984 S8  | KPNA3       | 2.97E-15 | 1.21E-07    | 8.14E-12    | 1.24E-13 | 5.04E-06    | 7.34E-10 |
| phe.Fasting_rs180772028 S8 | "DIAPH1,LOC | rs116120727 S9  | BRD2        | 4.89E-11 | 0.00199774  | 6.62E-08    | 4.07E-14 | 1.66E-06    | 2.85E-10 |
| phe.Fasting_rs180772028 S8 | "DIAPH1,LOC | rs116406581 S2  | NA          | 1.81E-14 | 7.39E-07    | 4.52E-11    | 2.35E-07 | 1           | 3.05E-04 |
| phe.Fasting_rs180772028 S8 | "DIAPH1,LOC | rs116548615 S8  | TMEM45B     | 1.73E-16 | 7.06E-09    | 6.15E-13    | 8.70E-12 | 0.000354153 | 3.26E-08 |
| phe.Fasting_rs180772028 S8 | "DIAPH1,LOC | rs116696844 S3  | AP3M2       | 6.92E-15 | 2.83E-07    | 1.78E-11    | 3.87E-07 | 1           | 4.75E-04 |
| phe.Fasting_rs180772028 S8 | "DIAPH1,LOC | rs11989304 S4   | TMEM64      | 2.37E-06 | 1.00E+00    | 1.30E-03    | 6.78E-11 | 0.00276161  | 2.13E-07 |
| phe.Fasting_rs180772028 S8 | "DIAPH1,LOC | rs140524622 S7  | MRPL10      | 1.08E-16 | 4.41E-09    | 4.54E-13    | 7.35E-06 | 1           | 6.31E-03 |
| phe.Fasting_rs180772028 S8 | "DIAPH1,LOC | rs146815317 S5  | KPNA3       | 2.97E-15 | 1.21E-07    | 8.14E-12    | 1.18E-13 | 4.80E-06    | 7.06E-10 |
| phe.Fasting_rs180772028 S8 | "DIAPH1,LOC | rs150117838 S8  | KPNA3       | 2.97E-15 | 1.21E-07    | 8.14E-12    | 1.09E-13 | 4.44E-06    | 6.79E-10 |
| phe.Fasting_rs180772028 S8 | "DIAPH1,LOC | rs150916187 S4  | HIST1H2BK   | 1.38E-05 | 1.00E+00    | 6.05E-03    | 1.37E-14 | 5.59E-07    | 1.16E-10 |
| phe.Fasting_rs180772028 S8 | "DIAPH1,LOC | rs16894241 S4   | HIST1H2BK   | 1.99E-11 | 0.000812315 | 2.96E-08    | 3.44E-14 | 1.40E-06    | 2.50E-10 |
| phe.Fasting_rs180772028 S8 | "DIAPH1,LOC | rs2032062 S8    | NA          | 1.22E-14 | 4.98E-07    | 3.09E-11    | 8.48E-06 | 1           | 7.14E-03 |
| phe.Fasting_rs180772028 S8 | "DIAPH1,LOC | rs2153597 S8    | ZNF438      | 5.51E-11 | 2.25E-03    | 7.42E-08    | 4.52E-09 | 0.183916    | 9.08E-06 |

|                           |                       |     |             |          |             |            |          |             |          |
|---------------------------|-----------------------|-----|-------------|----------|-------------|------------|----------|-------------|----------|
| phe.Fasting_rs180772028S8 | "DIAPH1,LOCrs2835656  | S7  | TTC3        | 3.01E-10 | 0.0122766   | 3.60E-07   | 9.12E-06 | 1           | 7.57E-03 |
| phe.Fasting_rs180772028S8 | "DIAPH1,LOCrs34801978 | S3  | HOXB2       | 1.23E-05 | 1           | 0.00545724 | 1.03E-08 | 0.419057    | 1.90E-05 |
| phe.Fasting_rs180772028S8 | "DIAPH1,LOCrs352346   | S3  | GRPEL2      | 1.85E-11 | 0.000754995 | 2.78E-08   | 8.42E-06 | 1           | 7.10E-03 |
| phe.Fasting_rs180772028S8 | "DIAPH1,LOCrs3750898  | S8  | DCLRE1A     | 2.29E-05 | 1           | 0.0093502  | 8.76E-06 | 1           | 7.32E-03 |
| phe.Fasting_rs180772028S8 | "DIAPH1,LOCrs4732511  | S13 | POR         | 2.30E-15 | 9.39E-08    | 6.48E-12   | 9.65E-06 | 1           | 7.93E-03 |
| phe.Fasting_rs180772028S8 | "DIAPH1,LOCrs57503635 | S3  | NA          | 6.34E-16 | 2.59E-08    | 1.95E-12   | 3.17E-14 | 1.29E-06    | 2.34E-10 |
| phe.Fasting_rs180772028S8 | "DIAPH1,LOCrs58905476 | S7  | TTC3        | 3.29E-10 | 1.34E-02    | 3.90E-07   | 9.79E-06 | 1           | 8.01E-03 |
| phe.Fasting_rs180772028S8 | "DIAPH1,LOCrs60011869 | S16 | NA          | 1.04E-05 | 1.00E+00    | 4.72E-03   | 8.16E-10 | 0.0332257   | 1.98E-06 |
| phe.Fasting_rs180772028S8 | "DIAPH1,LOCrs6964407  | S7  | POR         | 7.55E-15 | 3.08E-07    | 1.94E-11   | 8.91E-06 | 1           | 7.43E-03 |
| phe.Fasting_rs180772028S8 | "DIAPH1,LOCrs7004597  | S8  | NA          | 4.51E-15 | 1.84E-07    | 1.18E-11   | 2.34E-07 | 1           | 3.04E-04 |
| phe.Fasting_rs180772028S8 | "DIAPH1,LOCrs7256517  | S7  | CYTH2       | 1.04E-15 | 4.24E-08    | 3.06E-12   | 4.82E-12 | 0.000196022 | 1.91E-08 |
| phe.Fasting_rs180772028S8 | "DIAPH1,LOCrs73283603 | S7  | ZWINT       | 1.90E-06 | 1.00E+00    | 1.07E-03   | 2.03E-07 | 1           | 2.68E-04 |
| phe.Fasting_rs180772028S8 | "DIAPH1,LOCrs73392640 | S8  | POLR3B      | 2.02E-10 | 8.26E-03    | 2.49E-07   | 5.19E-11 | 0.00211214  | 1.67E-07 |
| phe.Fasting_rs180772028S8 | "DIAPH1,LOCrs734069   | S19 | NA          | 2.06E-08 | 8.39E-01    | 1.81E-05   | 6.71E-10 | 0.0272994   | 1.68E-06 |
| phe.Fasting_rs180772028S8 | "DIAPH1,LOCrs73619637 | S8  | NA          | 1.44E-15 | 5.89E-08    | 4.14E-12   | 2.05E-10 | 0.00833668  | 5.78E-07 |
| phe.Fasting_rs180772028S8 | "DIAPH1,LOCrs74627895 | S8  | TMEM64      | 7.32E-07 | 1.00E+00    | 4.60E-04   | 2.03E-08 | 0.828094    | 3.48E-05 |
| phe.Fasting_rs180772028S8 | "DIAPH1,LOCrs74914207 | S24 | NA          | 1.37E-10 | 5.59E-03    | 1.73E-07   | 9.12E-11 | 0.0037135   | 2.80E-07 |
| phe.Fasting_rs180772028S8 | "DIAPH1,LOCrs75350765 | S5  | RCL1        | 1.82E-16 | 7.42E-09    | 6.37E-13   | 3.70E-08 | 1           | 5.84E-05 |
| phe.Fasting_rs180772028S8 | "DIAPH1,LOCrs75374128 | S5  | CNTLN       | 1.47E-16 | 6.01E-09    | 5.72E-13   | 1.01E-07 | 1           | 1.42E-04 |
| phe.Fasting_rs180772028S8 | "DIAPH1,LOCrs75506779 | S5  | TMCO3       | 5.55E-07 | 1.00E+00    | 3.61E-04   | 1.10E-08 | 0.449707    | 2.03E-05 |
| phe.Fasting_rs180772028S8 | "DIAPH1,LOCrs75758702 | S24 | NA          | 7.02E-17 | 2.87E-09    | 3.16E-13   | 1.57E-10 | 0.00638323  | 4.59E-07 |
| phe.Fasting_rs180772028S8 | "DIAPH1,LOCrs75864203 | S8  | CNTLN       | 1.47E-16 | 6.01E-09    | 5.72E-13   | 1.01E-07 | 1           | 1.42E-04 |
| phe.Fasting_rs180772028S8 | "DIAPH1,LOCrs75949566 | S5  | TMEM64      | 2.76E-06 | 1.00E+00    | 1.47E-03   | 8.48E-11 | 0.00345267  | 2.62E-07 |
| phe.Fasting_rs180772028S8 | "DIAPH1,LOCrs76844308 | S8  | CNTLN       | 7.68E-17 | 3.14E-09    | 3.41E-13   | 9.52E-08 | 1           | 1.35E-04 |
| phe.Fasting_rs180772028S8 | "DIAPH1,LOCrs7763107  | S8  | FARS2       | 5.78E-16 | 2.36E-08    | 1.79E-12   | 9.23E-12 | 0.000375564 | 3.44E-08 |
| phe.Fasting_rs180772028S8 | "DIAPH1,LOCrs77798597 | S7  | KPNA3       | 2.97E-15 | 1.21E-07    | 8.14E-12   | 1.09E-13 | 4.44E-06    | 6.79E-10 |
| phe.Fasting_rs180772028S8 | "DIAPH1,LOCrs77845645 | S21 | NA          | 1.53E-06 | 1.00E+00    | 8.88E-04   | 4.20E-11 | 0.00170882  | 1.38E-07 |
| phe.Fasting_rs180772028S8 | "DIAPH1,LOCrs78353402 | S8  | AP3M2       | 4.51E-15 | 1.84E-07    | 1.18E-11   | 3.87E-07 | 1           | 4.75E-04 |
| phe.Fasting_rs180772028S8 | "DIAPH1,LOCrs78516788 | S8  | SLC38A1     | 2.75E-11 | 1.12E-03    | 3.94E-08   | 2.44E-10 | 0.00992686  | 6.74E-07 |
| phe.Fasting_rs180772028S8 | "DIAPH1,LOCrs78697063 | S5  | MSI2        | 8.23E-19 | 3.36E-11    | 2.70E-14   | 6.84E-10 | 0.0278369   | 1.70E-06 |
| phe.Fasting_rs180772028S8 | "DIAPH1,LOCrs78722272 | S5  | CNTLN       | 1.47E-16 | 6.01E-09    | 5.72E-13   | 1.05E-07 | 1           | 1.48E-04 |
| phe.Fasting_rs180772028S8 | "DIAPH1,LOCrs78736524 | S5  | KPNA3       | 2.97E-15 | 1.21E-07    | 8.14E-12   | 1.18E-13 | 4.80E-06    | 7.06E-10 |
| phe.Fasting_rs180772028S8 | "DIAPH1,LOCrs78990344 | S2  | LOC1005063! | 2.37E-06 | 1.00E+00    | 1.30E-03   | 6.78E-11 | 0.00276161  | 2.13E-07 |
| phe.Fasting_rs180772028S8 | "DIAPH1,LOCrs79781495 | S8  | KPNA3       | 2.97E-15 | 1.21E-07    | 8.14E-12   | 1.09E-13 | 4.44E-06    | 6.79E-10 |
| phe.Fasting_rs180772028S8 | "DIAPH1,LOCrs79886603 | S15 | NA          | 8.71E-08 | 1.00E+00    | 6.74E-05   | 4.66E-07 | 1           | 5.59E-04 |
| phe.Fasting_rs180772028S8 | "DIAPH1,LOCrs80200953 | S8  | PPP2R5D     | 8.49E-17 | 3.47E-09    | 3.69E-13   | 3.65E-09 | 0.148399    | 7.55E-06 |
| phe.Fasting_rs180772028S8 | "DIAPH1,LOCrs80332465 | S5  | KPNA3       | 3.13E-15 | 1.28E-07    | 8.51E-12   | 1.17E-13 | 4.77E-06    | 7.06E-10 |
| phe.Fasting_rs180772028S8 | "DIAPH1,LOCrs80334773 | S5  | KPNA3       | 3.13E-15 | 1.28E-07    | 8.51E-12   | 1.17E-13 | 4.77E-06    | 7.06E-10 |
| phe.Fasting_rs181224861S7 | DIAPH1 rs111576333    | S5  | TMEM64      | 2.37E-06 | 1.00E+00    | 1.30E-03   | 5.87E-14 | 2.39E-06    | 3.99E-10 |
| phe.Fasting_rs181224861S7 | DIAPH1 rs112089881    | S8  | ZFAND4      | 2.04E-17 | 8.32E-10    | 1.43E-13   | 1.09E-09 | 0.0445256   | 2.58E-06 |

|                           |        |                |           |          |             |             |          |             |          |
|---------------------------|--------|----------------|-----------|----------|-------------|-------------|----------|-------------|----------|
| phe.Fasting_rs181224861S7 | DIAPH1 | rs112091318S5  | TMEM64    | 7.32E-07 | 1.00E+00    | 4.60E-04    | 3.91E-08 | 1           | 6.13E-05 |
| phe.Fasting_rs181224861S7 | DIAPH1 | rs114334325S7  | AP3M2     | 4.51E-15 | 1.84E-07    | 1.18E-11    | 3.87E-07 | 1           | 4.75E-04 |
| phe.Fasting_rs181224861S7 | DIAPH1 | rs114394395S7  | AP3M2     | 4.81E-15 | 1.97E-07    | 1.25E-11    | 3.87E-07 | 1           | 4.75E-04 |
| phe.Fasting_rs181224861S7 | DIAPH1 | rs114565620S8  | RCL1      | 1.82E-16 | 7.42E-09    | 6.37E-13    | 3.70E-08 | 1           | 5.84E-05 |
| phe.Fasting_rs181224861S7 | DIAPH1 | rs115083290S19 | NA        | 4.38E-16 | 1.79E-08    | 1.40E-12    | 1.42E-08 | 0.576679    | 2.53E-05 |
| phe.Fasting_rs181224861S7 | DIAPH1 | rs11524145 S5  | CDK6      | 7.80E-07 | 1.00E+00    | 4.86E-04    | 7.89E-06 | 1           | 6.69E-03 |
| phe.Fasting_rs181224861S7 | DIAPH1 | rs115752779S19 | NA        | 4.38E-16 | 1.79E-08    | 1.40E-12    | 1.42E-08 | 0.576679    | 2.53E-05 |
| phe.Fasting_rs181224861S7 | DIAPH1 | rs115787552S5  | KPNA3     | 2.97E-15 | 1.21E-07    | 8.14E-12    | 1.18E-13 | 4.80E-06    | 7.06E-10 |
| phe.Fasting_rs181224861S7 | DIAPH1 | rs115888477S8  | NA        | 2.03E-14 | 8.28E-07    | 5.02E-11    | 2.21E-14 | 8.99E-07    | 1.73E-10 |
| phe.Fasting_rs181224861S7 | DIAPH1 | rs116011837S9  | BRD2      | 4.89E-11 | 2.00E-03    | 6.62E-08    | 4.07E-14 | 1.66E-06    | 2.85E-10 |
| phe.Fasting_rs181224861S7 | DIAPH1 | rs116079984S8  | KPNA3     | 2.97E-15 | 1.21E-07    | 8.14E-12    | 1.24E-13 | 5.04E-06    | 7.34E-10 |
| phe.Fasting_rs181224861S7 | DIAPH1 | rs116120727S9  | BRD2      | 4.89E-11 | 2.00E-03    | 6.62E-08    | 4.07E-14 | 1.66E-06    | 2.85E-10 |
| phe.Fasting_rs181224861S7 | DIAPH1 | rs116406581S2  | NA        | 1.81E-14 | 7.39E-07    | 4.52E-11    | 2.35E-07 | 1           | 3.05E-04 |
| phe.Fasting_rs181224861S7 | DIAPH1 | rs116548615S8  | TMEM45B   | 1.73E-16 | 7.06E-09    | 6.15E-13    | 8.70E-12 | 0.000354153 | 3.26E-08 |
| phe.Fasting_rs181224861S7 | DIAPH1 | rs116696844S3  | AP3M2     | 6.92E-15 | 2.83E-07    | 1.78E-11    | 3.87E-07 | 1           | 4.75E-04 |
| phe.Fasting_rs181224861S7 | DIAPH1 | rs11989304 S4  | TMEM64    | 2.37E-06 | 1.00E+00    | 1.30E-03    | 6.78E-11 | 0.00276161  | 2.13E-07 |
| phe.Fasting_rs181224861S7 | DIAPH1 | rs140524622S7  | MRPL10    | 1.08E-16 | 4.41E-09    | 4.54E-13    | 7.35E-06 | 1           | 6.31E-03 |
| phe.Fasting_rs181224861S7 | DIAPH1 | rs146815317S5  | KPNA3     | 2.97E-15 | 1.21E-07    | 8.14E-12    | 1.18E-13 | 4.80E-06    | 7.06E-10 |
| phe.Fasting_rs181224861S7 | DIAPH1 | rs150117838S8  | KPNA3     | 2.97E-15 | 1.21E-07    | 8.14E-12    | 1.09E-13 | 4.44E-06    | 6.79E-10 |
| phe.Fasting_rs181224861S7 | DIAPH1 | rs150916187S4  | HIST1H2BK | 1.38E-05 | 1           | 0.00605332  | 1.37E-14 | 5.59E-07    | 1.16E-10 |
| phe.Fasting_rs181224861S7 | DIAPH1 | rs16894241 S4  | HIST1H2BK | 1.99E-11 | 0.000812315 | 2.96E-08    | 3.44E-14 | 1.40E-06    | 2.50E-10 |
| phe.Fasting_rs181224861S7 | DIAPH1 | rs2032062 S8   | NA        | 1.22E-14 | 4.98E-07    | 3.09E-11    | 8.48E-06 | 1           | 7.14E-03 |
| phe.Fasting_rs181224861S7 | DIAPH1 | rs2153597 S8   | ZNF438    | 5.51E-11 | 0.00224928  | 7.42E-08    | 4.52E-09 | 0.183916    | 9.08E-06 |
| phe.Fasting_rs181224861S7 | DIAPH1 | rs2835656 S7   | TTC3      | 3.01E-10 | 0.0122766   | 3.60E-07    | 9.12E-06 | 1           | 7.57E-03 |
| phe.Fasting_rs181224861S7 | DIAPH1 | rs34801978 S3  | HOXB2     | 1.23E-05 | 1           | 0.00545724  | 1.03E-08 | 0.419057    | 1.90E-05 |
| phe.Fasting_rs181224861S7 | DIAPH1 | rs352346 S3    | GRPEL2    | 1.85E-11 | 0.000754995 | 2.78E-08    | 8.42E-06 | 1           | 7.10E-03 |
| phe.Fasting_rs181224861S7 | DIAPH1 | rs3750898 S8   | DCLRE1A   | 2.29E-05 | 1.00E+00    | 9.35E-03    | 8.76E-06 | 1           | 7.32E-03 |
| phe.Fasting_rs181224861S7 | DIAPH1 | rs4732511 S13  | POR       | 2.30E-15 | 9.39E-08    | 6.48E-12    | 9.65E-06 | 1           | 7.93E-03 |
| phe.Fasting_rs181224861S7 | DIAPH1 | rs57503635 S3  | NA        | 6.34E-16 | 2.59E-08    | 1.95E-12    | 3.17E-14 | 1.29E-06    | 2.34E-10 |
| phe.Fasting_rs181224861S7 | DIAPH1 | rs58905476 S7  | TTC3      | 3.29E-10 | 1.34E-02    | 3.90E-07    | 9.79E-06 | 1           | 8.01E-03 |
| phe.Fasting_rs181224861S7 | DIAPH1 | rs60011869 S16 | NA        | 1.04E-05 | 1           | 0.00472365  | 8.16E-10 | 0.0332257   | 1.98E-06 |
| phe.Fasting_rs181224861S7 | DIAPH1 | rs6964407 S7   | POR       | 7.55E-15 | 3.08E-07    | 1.94E-11    | 8.91E-06 | 1           | 7.43E-03 |
| phe.Fasting_rs181224861S7 | DIAPH1 | rs7004597 S8   | NA        | 4.51E-15 | 1.84E-07    | 1.18E-11    | 2.34E-07 | 1           | 3.04E-04 |
| phe.Fasting_rs181224861S7 | DIAPH1 | rs7256517 S7   | CYTH2     | 1.04E-15 | 4.24E-08    | 3.06E-12    | 4.82E-12 | 0.000196022 | 1.91E-08 |
| phe.Fasting_rs181224861S7 | DIAPH1 | rs73283603 S7  | ZWINT     | 1.90E-06 | 1.00E+00    | 1.07E-03    | 2.03E-07 | 1           | 2.68E-04 |
| phe.Fasting_rs181224861S7 | DIAPH1 | rs73392640 S8  | POLR3B    | 2.02E-10 | 8.26E-03    | 2.49E-07    | 5.19E-11 | 0.00211214  | 1.67E-07 |
| phe.Fasting_rs181224861S7 | DIAPH1 | rs734069 S19   | NA        | 2.06E-08 | 8.39E-01    | 1.81E-05    | 6.71E-10 | 0.0272994   | 1.68E-06 |
| phe.Fasting_rs181224861S7 | DIAPH1 | rs73619637 S8  | NA        | 1.44E-15 | 5.89E-08    | 4.14E-12    | 2.05E-10 | 0.00833668  | 5.78E-07 |
| phe.Fasting_rs181224861S7 | DIAPH1 | rs74627895 S8  | TMEM64    | 7.32E-07 | 1           | 0.000459899 | 2.03E-08 | 0.828094    | 3.48E-05 |
| phe.Fasting_rs181224861S7 | DIAPH1 | rs74914207 S24 | NA        | 1.37E-10 | 0.00558626  | 1.73E-07    | 9.12E-11 | 0.0037135   | 2.80E-07 |



|                            |                       |            |           |             |          |           |             |             |             |          |
|----------------------------|-----------------------|------------|-----------|-------------|----------|-----------|-------------|-------------|-------------|----------|
| phe.Fasting_rs181224861S7  | DIAPH1                | rs75350765 | S5        | RCL1        | 1.82E-16 | 7.42E-09  | 6.37E-13    | 3.70E-08    | 1           | 5.84E-05 |
| phe.Fasting_rs181224861S7  | DIAPH1                | rs75374128 | S5        | CNTLN       | 1.47E-16 | 6.01E-09  | 5.72E-13    | 1.01E-07    | 1           | 1.42E-04 |
| phe.Fasting_rs181224861S7  | DIAPH1                | rs75506779 | S5        | TMCO3       | 5.55E-07 | 1         | 0.000360863 | 1.10E-08    | 0.449707    | 2.03E-05 |
| phe.Fasting_rs181224861S7  | DIAPH1                | rs75758702 | S24       | NA          | 7.02E-17 | 2.87E-09  | 3.16E-13    | 1.57E-10    | 0.00638323  | 4.59E-07 |
| phe.Fasting_rs181224861S7  | DIAPH1                | rs75864203 | S8        | CNTLN       | 1.47E-16 | 6.01E-09  | 5.72E-13    | 1.01E-07    | 1           | 1.42E-04 |
| phe.Fasting_rs181224861S7  | DIAPH1                | rs75949566 | S5        | TMEM64      | 2.76E-06 | 1         | 0.001473    | 8.48E-11    | 0.00345267  | 2.62E-07 |
| phe.Fasting_rs181224861S7  | DIAPH1                | rs76844308 | S8        | CNTLN       | 7.68E-17 | 3.14E-09  | 3.41E-13    | 9.52E-08    | 1           | 1.35E-04 |
| phe.Fasting_rs181224861S7  | DIAPH1                | rs7763107  | S8        | FARS2       | 5.78E-16 | 2.36E-08  | 1.79E-12    | 9.23E-12    | 0.000375564 | 3.44E-08 |
| phe.Fasting_rs181224861S7  | DIAPH1                | rs77798597 | S7        | KPNA3       | 2.97E-15 | 1.21E-07  | 8.14E-12    | 1.09E-13    | 4.44E-06    | 6.79E-10 |
| phe.Fasting_rs181224861S7  | DIAPH1                | rs77845645 | S21       | NA          | 1.53E-06 | 1         | 0.000888475 | 4.20E-11    | 0.00170882  | 1.38E-07 |
| phe.Fasting_rs181224861S7  | DIAPH1                | rs78353402 | S8        | AP3M2       | 4.51E-15 | 1.84E-07  | 1.18E-11    | 3.87E-07    | 1           | 4.75E-04 |
| phe.Fasting_rs181224861S7  | DIAPH1                | rs78516788 | S8        | SLC38A1     | 2.75E-11 | 1.12E-03  | 3.94E-08    | 2.44E-10    | 0.00992686  | 6.74E-07 |
| phe.Fasting_rs181224861S7  | DIAPH1                | rs78697063 | S5        | MSI2        | 8.23E-19 | 3.36E-11  | 2.70E-14    | 6.84E-10    | 0.0278369   | 1.70E-06 |
| phe.Fasting_rs181224861S7  | DIAPH1                | rs78722272 | S5        | CNTLN       | 1.47E-16 | 6.01E-09  | 5.72E-13    | 1.05E-07    | 1           | 1.48E-04 |
| phe.Fasting_rs181224861S7  | DIAPH1                | rs78736524 | S5        | KPNA3       | 2.97E-15 | 1.21E-07  | 8.14E-12    | 1.18E-13    | 4.80E-06    | 7.06E-10 |
| phe.Fasting_rs181224861S7  | DIAPH1                | rs78990344 | S2        | LOC10050631 | 2.37E-06 | 1         | 0.00129547  | 6.78E-11    | 0.00276161  | 2.13E-07 |
| phe.Fasting_rs181224861S7  | DIAPH1                | rs79781495 | S8        | KPNA3       | 2.97E-15 | 1.21E-07  | 8.14E-12    | 1.09E-13    | 4.44E-06    | 6.79E-10 |
| phe.Fasting_rs181224861S7  | DIAPH1                | rs79886603 | S15       | NA          | 8.71E-08 | 1.00E+00  | 6.74E-05    | 4.66E-07    | 1           | 5.59E-04 |
| phe.Fasting_rs181224861S7  | DIAPH1                | rs80200953 | S8        | PPP2R5D     | 8.49E-17 | 3.47E-09  | 3.69E-13    | 3.65E-09    | 0.148399    | 7.55E-06 |
| phe.Fasting_rs181224861S7  | DIAPH1                | rs80332465 | S5        | KPNA3       | 3.13E-15 | 1.28E-07  | 8.51E-12    | 1.17E-13    | 4.77E-06    | 7.06E-10 |
| phe.Fasting_rs181224861S7  | DIAPH1                | rs80334773 | S5        | KPNA3       | 3.13E-15 | 1.28E-07  | 8.51E-12    | 1.17E-13    | 4.77E-06    | 7.06E-10 |
| phe.Fasting_rs181247960S21 | "PCDHGA9,Prs112089881 | S8         | ZFAND4    | 1.96E-18    | 7.99E-11 | 4.03E-14  | 3.02E-10    | 0.0122912   | 1           | 8.15E-07 |
| phe.Fasting_rs181247960S21 | "PCDHGA9,Prs112091318 | S5         | TMEM64    | 1.52E-05    | 1        | 0.0065785 | 2.56E-07    | 1           | 1           | 3.30E-04 |
| phe.Fasting_rs181247960S21 | "PCDHGA9,Prs114334325 | S7         | AP3M2     | 8.70E-16    | 3.55E-08 | 2.60E-12  | 5.52E-06    | 1           | 1           | 4.97E-03 |
| phe.Fasting_rs181247960S21 | "PCDHGA9,Prs114394395 | S7         | AP3M2     | 9.30E-16    | 3.80E-08 | 2.77E-12  | 5.52E-06    | 1           | 1           | 4.97E-03 |
| phe.Fasting_rs181247960S21 | "PCDHGA9,Prs114565620 | S8         | RCL1      | 1.29E-17    | 5.26E-10 | 1.08E-13  | 1.39E-08    | 0.566303    | 1           | 2.49E-05 |
| phe.Fasting_rs181247960S21 | "PCDHGA9,Prs115305957 | S23        | NA        | 1.81E-05    | 1.00E+00 | 7.66E-03  | 1.43E-12    | 5.82E-05    | 1           | 6.44E-09 |
| phe.Fasting_rs181247960S21 | "PCDHGA9,Prs115787552 | S5         | KPNA3     | 3.78E-16    | 1.54E-08 | 1.23E-12  | 4.20E-14    | 1.71E-06    | 1           | 2.93E-10 |
| phe.Fasting_rs181247960S21 | "PCDHGA9,Prs115888477 | S8         | NA        | 2.72E-15    | 1.11E-07 | 7.62E-12  | 7.36E-15    | 3.00E-07    | 1           | 6.53E-11 |
| phe.Fasting_rs181247960S21 | "PCDHGA9,Prs116011837 | S9         | BRD2      | 1.05E-06    | 1.00E+00 | 6.32E-04  | 6.95E-14    | 2.83E-06    | 1           | 4.69E-10 |
| phe.Fasting_rs181247960S21 | "PCDHGA9,Prs116079984 | S8         | KPNA3     | 3.78E-16    | 1.54E-08 | 1.23E-12  | 4.48E-14    | 1.82E-06    | 1           | 3.11E-10 |
| phe.Fasting_rs181247960S21 | "PCDHGA9,Prs116120727 | S9         | BRD2      | 1.05E-06    | 1.00E+00 | 6.32E-04  | 6.95E-14    | 2.83E-06    | 1           | 4.69E-10 |
| phe.Fasting_rs181247960S21 | "PCDHGA9,Prs116406581 | S2         | NA        | 3.68E-15    | 1.50E-07 | 9.90E-12  | 3.30E-06    | 1           | 1           | 3.18E-03 |
| phe.Fasting_rs181247960S21 | "PCDHGA9,Prs116548615 | S8         | TMEM45B   | 2.04E-17    | 8.34E-10 | 1.43E-13  | 7.86E-12    | 0.000320069 | 1           | 2.98E-08 |
| phe.Fasting_rs181247960S21 | "PCDHGA9,Prs116696844 | S3         | AP3M2     | 1.40E-15    | 5.70E-08 | 4.02E-12  | 5.52E-06    | 1           | 1           | 4.97E-03 |
| phe.Fasting_rs181247960S21 | "PCDHGA9,Prs146815317 | S5         | KPNA3     | 3.78E-16    | 1.54E-08 | 1.23E-12  | 4.20E-14    | 1.71E-06    | 1           | 2.93E-10 |
| phe.Fasting_rs181247960S21 | "PCDHGA9,Prs150117838 | S8         | KPNA3     | 3.78E-16    | 1.54E-08 | 1.23E-12  | 3.89E-14    | 1.58E-06    | 1           | 2.77E-10 |
| phe.Fasting_rs181247960S21 | "PCDHGA9,Prs16894241  | S4         | HIST1H2BK | 1.90E-07    | 1.00E+00 | 1.36E-04  | 1.18E-14    | 4.80E-07    | 1           | 1.01E-10 |
| phe.Fasting_rs181247960S21 | "PCDHGA9,Prs2153597   | S8         | ZNF438    | 5.42E-12    | 2.22E-04 | 9.59E-09  | 5.42E-06    | 1           | 1           | 4.90E-03 |
| phe.Fasting_rs181247960S21 | "PCDHGA9,Prs352346    | S3         | GRPEL2    | 2.27E-07    | 1.00E+00 | 1.60E-04  | 1.07E-05    | 1           | 1           | 8.65E-03 |

|                            |                       |       |             |          |          |            |          |             |          |           |          |
|----------------------------|-----------------------|-------|-------------|----------|----------|------------|----------|-------------|----------|-----------|----------|
| phe.Fasting_rs181247960S21 | "PCDHGA9,Prs57503635  | S3    | NA          | 7.95E-08 | 1.00E+00 | 6.20E-05   | 1.16E-14 | 4.73E-07    | 1.00E-10 |           |          |
| phe.Fasting_rs181247960S21 | "PCDHGA9,Prs60011869  | S16   | NA          | 1.45E-06 | 1.00E+00 | 8.45E-04   | 3.19E-10 | 0.0129858   | 8.56E-07 |           |          |
| phe.Fasting_rs181247960S21 | "PCDHGA9,Prs7004597   | S8    | NA          | 8.70E-16 | 3.55E-08 | 2.60E-12   | 3.26E-06 | 1           | 3.15E-03 |           |          |
| phe.Fasting_rs181247960S21 | "PCDHGA9,Prs7256517   | S7    | CYTH2       | 1.38E-16 | 5.63E-09 | 5.47E-13   | 2.91E-10 | 0.0118364   | 7.91E-07 |           |          |
| phe.Fasting_rs181247960S21 | "PCDHGA9,Prs73392640  | S8    | POLR3B      | 3.00E-11 | 1.22E-03 | 4.24E-08   | 4.09E-10 | 0.0166326   | 1.07E-06 |           |          |
| phe.Fasting_rs181247960S21 | "PCDHGA9,Prs74627895  | S8    | TMEM64      | 1.52E-05 | 1.00E+00 | 6.58E-03   | 1.28E-07 | 1           | 1.77E-04 |           |          |
| phe.Fasting_rs181247960S21 | "PCDHGA9,Prs74701059  | S24   | C17orf102   | 1.84E-05 | 1.00E+00 | 7.76E-03   | 2.11E-12 | 8.58E-05    | 9.15E-09 |           |          |
| phe.Fasting_rs181247960S21 | "PCDHGA9,Prs74914207  | S24   | NA          | 1.23E-11 | 5.03E-04 | 1.92E-08   | 1.49E-07 | 1           | 2.03E-04 |           |          |
| phe.Fasting_rs181247960S21 | "PCDHGA9,Prs75350765  | S5    | RCL1        | 1.29E-17 | 5.26E-10 | 1.08E-13   | 1.39E-08 | 0.566303    | 2.49E-05 |           |          |
| phe.Fasting_rs181247960S21 | "PCDHGA9,Prs75374128  | S5    | CNTLN       | 1.32E-17 | 5.41E-10 | 1.09E-13   | 2.01E-06 | 1           | 2.08E-03 |           |          |
| phe.Fasting_rs181247960S21 | "PCDHGA9,Prs75758702  | S24   | NA          | 7.70E-18 | 3.14E-10 | 8.50E-14   | 6.42E-10 | 0.0261274   | 1.61E-06 |           |          |
| phe.Fasting_rs181247960S21 | "PCDHGA9,Prs75864203  | S8    | CNTLN       | 1.32E-17 | 5.41E-10 | 1.09E-13   | 2.01E-06 | 1           | 2.08E-03 |           |          |
| phe.Fasting_rs181247960S21 | "PCDHGA9,Prs76844308  | S8    | CNTLN       | 7.07E-18 | 2.89E-10 | 8.18E-14   | 1.78E-06 | 1           | 1.87E-03 |           |          |
| phe.Fasting_rs181247960S21 | "PCDHGA9,Prs7763107   | S8    | FARS2       | 2.63E-08 | 1.00E+00 | 2.28E-05   | 3.07E-10 | 0.012484    | 8.27E-07 |           |          |
| phe.Fasting_rs181247960S21 | "PCDHGA9,Prs77798597  | S7    | KPNA3       | 3.78E-16 | 1.54E-08 | 1.23E-12   | 3.89E-14 | 1.58E-06    | 2.77E-10 |           |          |
| phe.Fasting_rs181247960S21 | "PCDHGA9,Prs77845645  | S21   | NA          | 2.15E-07 | 1.00E+00 | 1.52E-04   | 2.70E-11 | 0.00109923  | 9.29E-08 |           |          |
| phe.Fasting_rs181247960S21 | "PCDHGA9,Prs78353402  | S8    | AP3M2       | 8.70E-16 | 3.55E-08 | 2.60E-12   | 5.52E-06 | 1           | 4.97E-03 |           |          |
| phe.Fasting_rs181247960S21 | "PCDHGA9,Prs78516788  | S8    | SLC38A1     | 3.43E-12 | 1.40E-04 | 6.23E-09   | 7.67E-09 | 0.312323    | 1.47E-05 |           |          |
| phe.Fasting_rs181247960S21 | "PCDHGA9,Prs78697063  | S5    | MSI2        | 4.23E-20 | 1.73E-12 | 2.23E-14   | 2.49E-10 | 0.0101226   | 6.85E-07 |           |          |
| phe.Fasting_rs181247960S21 | "PCDHGA9,Prs78722272  | S5    | CNTLN       | 1.32E-17 | 5.41E-10 | 1.09E-13   | 2.07E-06 | 1           | 2.14E-03 |           |          |
| phe.Fasting_rs181247960S21 | "PCDHGA9,Prs78736524  | S5    | KPNA3       | 3.78E-16 | 1.54E-08 | 1.23E-12   | 4.20E-14 | 1.71E-06    | 2.93E-10 |           |          |
| phe.Fasting_rs181247960S21 | "PCDHGA9,Prs79703349  | S24   | C17orf102   | 1.84E-05 | 1.00E+00 | 7.76E-03   | 2.63E-12 | 0.000107117 | 1.13E-08 |           |          |
| phe.Fasting_rs181247960S21 | "PCDHGA9,Prs79781495  | S8    | KPNA3       | 3.78E-16 | 1.54E-08 | 1.23E-12   | 3.89E-14 | 1.58E-06    | 2.77E-10 |           |          |
| phe.Fasting_rs181247960S21 | "PCDHGA9,Prs79886603  | S15   | NA          | 1.10E-08 | 4.48E-01 | 1.01E-05   | 9.00E-06 | 1           | 7.49E-03 |           |          |
| phe.Fasting_rs181247960S21 | "PCDHGA9,Prs80200953  | S8    | PPP2R5D     | 1.32E-08 | 5.39E-01 | 1.20E-05   | 3.10E-06 | 1           | 3.01E-03 |           |          |
| phe.Fasting_rs181247960S21 | "PCDHGA9,Prs80332465  | S5    | KPNA3       | 4.04E-16 | 1.65E-08 | 1.31E-12   | 4.20E-14 | 1.71E-06    | 2.93E-10 |           |          |
| phe.Fasting_rs181247960S21 | "PCDHGA9,Prs80334773  | S5    | KPNA3       | 4.04E-16 | 1.65E-08 | 1.31E-12   | 4.20E-14 | 1.71E-06    | 2.93E-10 |           |          |
| phe.Fasting_rs1814         | S8                    | COPG2 | rs116079984 | S8       | KPNA3    | 6.92E-06   | 1.00E+00 | 3.32E-03    | 7.68E-10 | 0.0312729 | 1.90E-06 |
| phe.Fasting_rs1814         | S8                    | COPG2 | rs74627895  | S8       | TMEM64   | 2.70E-10   | 1.10E-02 | 3.26E-07    | 9.17E-06 | 1         | 7.61E-03 |
| phe.Fasting_rs181824655S21 | "PCDHGB6,Prs112089881 | S8    | ZFAND4      | 1.96E-18 | 7.99E-11 | 4.03E-14   | 3.02E-10 | 0.0122912   | 8.15E-07 |           |          |
| phe.Fasting_rs181824655S21 | "PCDHGB6,Prs112091318 | S5    | TMEM64      | 1.52E-05 | 1        | 6.58E-03   | 2.56E-07 | 1           | 3.30E-04 |           |          |
| phe.Fasting_rs181824655S21 | "PCDHGB6,Prs114334325 | S7    | AP3M2       | 8.70E-16 | 3.55E-08 | 2.60E-12   | 5.52E-06 | 1           | 4.97E-03 |           |          |
| phe.Fasting_rs181824655S21 | "PCDHGB6,Prs114394395 | S7    | AP3M2       | 9.30E-16 | 3.80E-08 | 2.77E-12   | 5.52E-06 | 1           | 4.97E-03 |           |          |
| phe.Fasting_rs181824655S21 | "PCDHGB6,Prs114565620 | S8    | RCL1        | 1.29E-17 | 5.26E-10 | 1.08E-13   | 1.39E-08 | 0.566303    | 2.49E-05 |           |          |
| phe.Fasting_rs181824655S21 | "PCDHGB6,Prs115305957 | S23   | NA          | 1.81E-05 | 1        | 0.0076596  | 1.43E-12 | 5.82E-05    | 6.44E-09 |           |          |
| phe.Fasting_rs181824655S21 | "PCDHGB6,Prs115787552 | S5    | KPNA3       | 3.78E-16 | 1.54E-08 | 1.23E-12   | 4.20E-14 | 1.71E-06    | 2.93E-10 |           |          |
| phe.Fasting_rs181824655S21 | "PCDHGB6,Prs115888477 | S8    | NA          | 2.72E-15 | 1.11E-07 | 7.62E-12   | 7.36E-15 | 3.00E-07    | 6.53E-11 |           |          |
| phe.Fasting_rs181824655S21 | "PCDHGB6,Prs116011837 | S9    | BRD2        | 1.05E-06 | 1        | 0.00063174 | 6.95E-14 | 2.83E-06    | 4.69E-10 |           |          |
| phe.Fasting_rs181824655S21 | "PCDHGB6,Prs116079984 | S8    | KPNA3       | 3.78E-16 | 1.54E-08 | 1.23E-12   | 4.48E-14 | 1.82E-06    | 3.11E-10 |           |          |
| phe.Fasting_rs181824655S21 | "PCDHGB6,Prs116120727 | S9    | BRD2        | 1.05E-06 | 1.00E+00 | 6.32E-04   | 6.95E-14 | 2.83E-06    | 4.69E-10 |           |          |

|                             |                          |           |          |             |             |          |             |          |
|-----------------------------|--------------------------|-----------|----------|-------------|-------------|----------|-------------|----------|
| phe.Fasting_rs181824655 S21 | "PCDHGB6,Prs116406581 S2 | NA        | 3.68E-15 | 1.50E-07    | 9.90E-12    | 3.30E-06 | 1           | 3.18E-03 |
| phe.Fasting_rs181824655 S21 | "PCDHGB6,Prs116548615 S8 | TMEM45B   | 2.04E-17 | 8.34E-10    | 1.43E-13    | 7.86E-12 | 0.000320069 | 2.98E-08 |
| phe.Fasting_rs181824655 S21 | "PCDHGB6,Prs116696844 S3 | AP3M2     | 1.40E-15 | 5.70E-08    | 4.02E-12    | 5.52E-06 | 1           | 4.97E-03 |
| phe.Fasting_rs181824655 S21 | "PCDHGB6,Prs146815317 S5 | KPNA3     | 3.78E-16 | 1.54E-08    | 1.23E-12    | 4.20E-14 | 1.71E-06    | 2.93E-10 |
| phe.Fasting_rs181824655 S21 | "PCDHGB6,Prs150117838 S8 | KPNA3     | 3.78E-16 | 1.54E-08    | 1.23E-12    | 3.89E-14 | 1.58E-06    | 2.77E-10 |
| phe.Fasting_rs181824655 S21 | "PCDHGB6,Prs16894241 S4  | HIST1H2BK | 1.90E-07 | 1           | 1.36E-04    | 1.18E-14 | 4.80E-07    | 1.01E-10 |
| phe.Fasting_rs181824655 S21 | "PCDHGB6,Prs2153597 S8   | ZNF438    | 5.42E-12 | 0.000221525 | 9.59E-09    | 5.42E-06 | 1           | 4.90E-03 |
| phe.Fasting_rs181824655 S21 | "PCDHGB6,Prs352346 S3    | GRPEL2    | 2.27E-07 | 1           | 0.000160179 | 1.07E-05 | 1           | 8.65E-03 |
| phe.Fasting_rs181824655 S21 | "PCDHGB6,Prs57503635 S3  | NA        | 7.95E-08 | 1           | 6.20E-05    | 1.16E-14 | 4.73E-07    | 1.00E-10 |
| phe.Fasting_rs181824655 S21 | "PCDHGB6,Prs60011869 S16 | NA        | 1.45E-06 | 1           | 0.000845365 | 3.19E-10 | 0.0129858   | 8.56E-07 |
| phe.Fasting_rs181824655 S21 | "PCDHGB6,Prs7004597 S8   | NA        | 8.70E-16 | 3.55E-08    | 2.60E-12    | 3.26E-06 | 1           | 3.15E-03 |
| phe.Fasting_rs181824655 S21 | "PCDHGB6,Prs7256517 S7   | CYTH2     | 1.38E-16 | 5.63E-09    | 5.47E-13    | 2.91E-10 | 0.0118364   | 7.91E-07 |
| phe.Fasting_rs181824655 S21 | "PCDHGB6,Prs73392640 S8  | POLR3B    | 3.00E-11 | 0.00122354  | 4.24E-08    | 4.09E-10 | 0.0166326   | 1.07E-06 |
| phe.Fasting_rs181824655 S21 | "PCDHGB6,Prs74627895 S8  | TMEM64    | 1.52E-05 | 1           | 6.58E-03    | 1.28E-07 | 1           | 1.77E-04 |
| phe.Fasting_rs181824655 S21 | "PCDHGB6,Prs74701059 S24 | C17orf102 | 1.84E-05 | 1           | 1.76E-03    | 2.11E-12 | 8.58E-05    | 9.15E-09 |
| phe.Fasting_rs181824655 S21 | "PCDHGB6,Prs74914207 S24 | NA        | 1.23E-11 | 0.000502589 | 1.92E-08    | 1.49E-07 | 1           | 2.03E-04 |
| phe.Fasting_rs181824655 S21 | "PCDHGB6,Prs75350765 S5  | RCL1      | 1.29E-17 | 5.26E-10    | 1.08E-13    | 1.39E-08 | 0.566303    | 2.49E-05 |
| phe.Fasting_rs181824655 S21 | "PCDHGB6,Prs75374128 S5  | CNTLN     | 1.32E-17 | 5.41E-10    | 1.09E-13    | 2.01E-06 | 1           | 2.08E-03 |
| phe.Fasting_rs181824655 S21 | "PCDHGB6,Prs75758702 S24 | NA        | 7.70E-18 | 3.14E-10    | 8.50E-14    | 6.42E-10 | 0.0261274   | 1.61E-06 |
| phe.Fasting_rs181824655 S21 | "PCDHGB6,Prs75864203 S8  | CNTLN     | 1.32E-17 | 5.41E-10    | 1.09E-13    | 2.01E-06 | 1           | 2.08E-03 |
| phe.Fasting_rs181824655 S21 | "PCDHGB6,Prs76844308 S8  | CNTLN     | 7.07E-18 | 2.89E-10    | 8.18E-14    | 1.78E-06 | 1           | 1.87E-03 |
| phe.Fasting_rs181824655 S21 | "PCDHGB6,Prs7763107 S8   | FARS2     | 2.63E-08 | 1           | 2.28E-05    | 3.07E-10 | 0.012484    | 8.27E-07 |
| phe.Fasting_rs181824655 S21 | "PCDHGB6,Prs77798597 S7  | KPNA3     | 3.78E-16 | 1.54E-08    | 1.23E-12    | 3.89E-14 | 1.58E-06    | 2.77E-10 |
| phe.Fasting_rs181824655 S21 | "PCDHGB6,Prs77845645 S21 | NA        | 2.15E-07 | 1           | 1.52E-04    | 2.70E-11 | 0.00109923  | 9.29E-08 |
| phe.Fasting_rs181824655 S21 | "PCDHGB6,Prs78353402 S8  | AP3M2     | 8.70E-16 | 3.55E-08    | 2.60E-12    | 5.52E-06 | 1           | 4.97E-03 |
| phe.Fasting_rs181824655 S21 | "PCDHGB6,Prs78516788 S8  | SLC38A1   | 3.43E-12 | 0.000140209 | 6.23E-09    | 7.67E-09 | 0.312323    | 1.47E-05 |
| phe.Fasting_rs181824655 S21 | "PCDHGB6,Prs78697063 S5  | MSI2      | 4.23E-20 | 1.73E-12    | 2.23E-14    | 2.49E-10 | 0.0101226   | 6.85E-07 |
| phe.Fasting_rs181824655 S21 | "PCDHGB6,Prs78722272 S5  | CNTLN     | 1.32E-17 | 5.41E-10    | 1.09E-13    | 2.07E-06 | 1           | 2.14E-03 |
| phe.Fasting_rs181824655 S21 | "PCDHGB6,Prs78736524 S5  | KPNA3     | 3.78E-16 | 1.54E-08    | 1.23E-12    | 4.20E-14 | 1.71E-06    | 2.93E-10 |
| phe.Fasting_rs181824655 S21 | "PCDHGB6,Prs79703349 S24 | C17orf102 | 1.84E-05 | 1           | 7.76E-03    | 2.63E-12 | 0.000107117 | 1.13E-08 |
| phe.Fasting_rs181824655 S21 | "PCDHGB6,Prs79781495 S8  | KPNA3     | 3.78E-16 | 1.54E-08    | 1.23E-12    | 3.89E-14 | 1.58E-06    | 2.77E-10 |
| phe.Fasting_rs181824655 S21 | "PCDHGB6,Prs79886603 S15 | NA        | 1.10E-08 | 0.447989    | 1.01E-05    | 9.00E-06 | 1           | 7.49E-03 |
| phe.Fasting_rs181824655 S21 | "PCDHGB6,Prs80200953 S8  | PPP2R5D   | 1.32E-08 | 0.538553    | 1.20E-05    | 3.10E-06 | 1           | 3.01E-03 |
| phe.Fasting_rs181824655 S21 | "PCDHGB6,Prs80332465 S5  | KPNA3     | 4.04E-16 | 1.65E-08    | 1.31E-12    | 4.20E-14 | 1.71E-06    | 2.93E-10 |
| phe.Fasting_rs181824655 S21 | "PCDHGB6,Prs80334773 S5  | KPNA3     | 4.04E-16 | 1.65E-08    | 1.31E-12    | 4.20E-14 | 1.71E-06    | 2.93E-10 |
| phe.Fasting_rs182714699 S8  | DIAPH1 rs111576333 S5    | TMEM64    | 2.37E-06 | 1           | 1.30E-03    | 5.87E-14 | 2.39E-06    | 3.99E-10 |
| phe.Fasting_rs182714699 S8  | DIAPH1 rs112089881 S8    | ZFAND4    | 2.04E-17 | 8.32E-10    | 1.43E-13    | 1.09E-09 | 0.0445256   | 2.58E-06 |
| phe.Fasting_rs182714699 S8  | DIAPH1 rs112091318 S5    | TMEM64    | 7.32E-07 | 1           | 4.60E-04    | 3.91E-08 | 1           | 6.13E-05 |
| phe.Fasting_rs182714699 S8  | DIAPH1 rs114334325 S7    | AP3M2     | 4.51E-15 | 1.84E-07    | 1.18E-11    | 3.87E-07 | 1           | 4.75E-04 |
| phe.Fasting_rs182714699 S8  | DIAPH1 rs114394395 S7    | AP3M2     | 4.81E-15 | 1.97E-07    | 1.25E-11    | 3.87E-07 | 1           | 4.75E-04 |

|                           |        |                |           |          |             |             |          |             |          |
|---------------------------|--------|----------------|-----------|----------|-------------|-------------|----------|-------------|----------|
| phe.Fasting_rs182714699S8 | DIAPH1 | rs114565620S8  | RCL1      | 1.82E-16 | 7.42E-09    | 6.37E-13    | 3.70E-08 | 1           | 5.84E-05 |
| phe.Fasting_rs182714699S8 | DIAPH1 | rs115083290S19 | NA        | 4.38E-16 | 1.79E-08    | 1.40E-12    | 1.42E-08 | 0.576679    | 2.53E-05 |
| phe.Fasting_rs182714699S8 | DIAPH1 | rs11524145 S5  | CDK6      | 7.80E-07 | 1           | 4.86E-04    | 7.89E-06 | 1           | 6.69E-03 |
| phe.Fasting_rs182714699S8 | DIAPH1 | rs115752779S19 | NA        | 4.38E-16 | 1.79E-08    | 1.40E-12    | 1.42E-08 | 0.576679    | 2.53E-05 |
| phe.Fasting_rs182714699S8 | DIAPH1 | rs115787552S5  | KPNA3     | 2.97E-15 | 1.21E-07    | 8.14E-12    | 1.18E-13 | 4.80E-06    | 7.06E-10 |
| phe.Fasting_rs182714699S8 | DIAPH1 | rs115888477S8  | NA        | 2.03E-14 | 8.28E-07    | 5.02E-11    | 2.21E-14 | 8.99E-07    | 1.73E-10 |
| phe.Fasting_rs182714699S8 | DIAPH1 | rs116011837S9  | BRD2      | 4.89E-11 | 0.00199774  | 6.62E-08    | 4.07E-14 | 1.66E-06    | 2.85E-10 |
| phe.Fasting_rs182714699S8 | DIAPH1 | rs116079984S8  | KPNA3     | 2.97E-15 | 1.21E-07    | 8.14E-12    | 1.24E-13 | 5.04E-06    | 7.34E-10 |
| phe.Fasting_rs182714699S8 | DIAPH1 | rs116120727S9  | BRD2      | 4.89E-11 | 0.00199774  | 6.62E-08    | 4.07E-14 | 1.66E-06    | 2.85E-10 |
| phe.Fasting_rs182714699S8 | DIAPH1 | rs116406581S2  | NA        | 1.81E-14 | 7.39E-07    | 4.52E-11    | 2.35E-07 | 1           | 3.05E-04 |
| phe.Fasting_rs182714699S8 | DIAPH1 | rs116548615S8  | TMEM45B   | 1.73E-16 | 7.06E-09    | 6.15E-13    | 8.70E-12 | 0.000354153 | 3.26E-08 |
| phe.Fasting_rs182714699S8 | DIAPH1 | rs116696844S3  | AP3M2     | 6.92E-15 | 2.83E-07    | 1.78E-11    | 3.87E-07 | 1           | 4.75E-04 |
| phe.Fasting_rs182714699S8 | DIAPH1 | rs11989304 S4  | TMEM64    | 2.37E-06 | 1           | 1.30E-03    | 6.78E-11 | 0.00276161  | 2.13E-07 |
| phe.Fasting_rs182714699S8 | DIAPH1 | rs140524622S7  | MRPL10    | 1.08E-16 | 4.41E-09    | 4.54E-13    | 7.35E-06 | 1           | 6.31E-03 |
| phe.Fasting_rs182714699S8 | DIAPH1 | rs146815317S5  | KPNA3     | 2.97E-15 | 1.21E-07    | 8.14E-12    | 1.18E-13 | 4.80E-06    | 7.06E-10 |
| phe.Fasting_rs182714699S8 | DIAPH1 | rs150117838S8  | KPNA3     | 2.97E-15 | 1.21E-07    | 8.14E-12    | 1.09E-13 | 4.44E-06    | 6.79E-10 |
| phe.Fasting_rs182714699S8 | DIAPH1 | rs150916187S4  | HIST1H2BK | 1.38E-05 | 1.00E+00    | 6.05E-03    | 1.37E-14 | 5.59E-07    | 1.16E-10 |
| phe.Fasting_rs182714699S8 | DIAPH1 | rs16894241 S4  | HIST1H2BK | 1.99E-11 | 0.000812315 | 2.96E-08    | 3.44E-14 | 1.40E-06    | 2.50E-10 |
| phe.Fasting_rs182714699S8 | DIAPH1 | rs2032062 S8   | NA        | 1.22E-14 | 4.98E-07    | 3.09E-11    | 8.48E-06 | 1           | 7.14E-03 |
| phe.Fasting_rs182714699S8 | DIAPH1 | rs2153597 S8   | ZNF438    | 5.51E-11 | 0.00224928  | 7.42E-08    | 4.52E-09 | 0.183916    | 9.08E-06 |
| phe.Fasting_rs182714699S8 | DIAPH1 | rs2835656 S7   | TTC3      | 3.01E-10 | 1.23E-02    | 3.60E-07    | 9.12E-06 | 1           | 7.57E-03 |
| phe.Fasting_rs182714699S8 | DIAPH1 | rs34801978 S3  | HOXB2     | 1.23E-05 | 1           | 5.46E-03    | 1.03E-08 | 0.419057    | 1.90E-05 |
| phe.Fasting_rs182714699S8 | DIAPH1 | rs352346 S3    | GRPEL2    | 1.85E-11 | 0.000754995 | 2.78E-08    | 8.42E-06 | 1           | 7.10E-03 |
| phe.Fasting_rs182714699S8 | DIAPH1 | rs3750898 S8   | DCLRE1A   | 2.29E-05 | 1.00E+00    | 9.35E-03    | 8.76E-06 | 1           | 7.32E-03 |
| phe.Fasting_rs182714699S8 | DIAPH1 | rs4732511 S13  | POR       | 2.30E-15 | 9.39E-08    | 6.48E-12    | 9.65E-06 | 1           | 7.93E-03 |
| phe.Fasting_rs182714699S8 | DIAPH1 | rs57503635 S3  | NA        | 6.34E-16 | 2.59E-08    | 1.95E-12    | 3.17E-14 | 1.29E-06    | 2.34E-10 |
| phe.Fasting_rs182714699S8 | DIAPH1 | rs58905476 S7  | TTC3      | 3.29E-10 | 0.0134302   | 3.90E-07    | 9.79E-06 | 1           | 8.01E-03 |
| phe.Fasting_rs182714699S8 | DIAPH1 | rs60011869 S16 | NA        | 1.04E-05 | 1           | 0.00472365  | 8.16E-10 | 0.0332257   | 1.98E-06 |
| phe.Fasting_rs182714699S8 | DIAPH1 | rs6964407 S7   | POR       | 7.55E-15 | 3.08E-07    | 1.94E-11    | 8.91E-06 | 1           | 7.43E-03 |
| phe.Fasting_rs182714699S8 | DIAPH1 | rs7004597 S8   | NA        | 4.51E-15 | 1.84E-07    | 1.18E-11    | 2.34E-07 | 1           | 3.04E-04 |
| phe.Fasting_rs182714699S8 | DIAPH1 | rs7256517 S7   | CYTH2     | 1.04E-15 | 4.24E-08    | 3.06E-12    | 4.82E-12 | 0.000196022 | 1.91E-08 |
| phe.Fasting_rs182714699S8 | DIAPH1 | rs73283603 S7  | ZWINT     | 1.90E-06 | 1           | 0.0010688   | 2.03E-07 | 1           | 2.68E-04 |
| phe.Fasting_rs182714699S8 | DIAPH1 | rs73392640 S8  | POLR3B    | 2.02E-10 | 0.00826001  | 2.49E-07    | 5.19E-11 | 0.00211214  | 1.67E-07 |
| phe.Fasting_rs182714699S8 | DIAPH1 | rs734069 S19   | NA        | 2.06E-08 | 0.839421    | 1.81E-05    | 6.71E-10 | 0.0272994   | 1.68E-06 |
| phe.Fasting_rs182714699S8 | DIAPH1 | rs73619637 S8  | NA        | 1.44E-15 | 5.89E-08    | 4.14E-12    | 2.05E-10 | 0.00833668  | 5.78E-07 |
| phe.Fasting_rs182714699S8 | DIAPH1 | rs74627895 S8  | TMEM64    | 7.32E-07 | 1           | 0.000459899 | 2.03E-08 | 0.828094    | 3.48E-05 |
| phe.Fasting_rs182714699S8 | DIAPH1 | rs74914207 S24 | NA        | 1.37E-10 | 0.00558626  | 1.73E-07    | 9.12E-11 | 0.0037135   | 2.80E-07 |
| phe.Fasting_rs182714699S8 | DIAPH1 | rs75350765 S5  | RCL1      | 1.82E-16 | 7.42E-09    | 6.37E-13    | 3.70E-08 | 1           | 5.84E-05 |
| phe.Fasting_rs182714699S8 | DIAPH1 | rs75374128 S5  | CNTLN     | 1.47E-16 | 6.01E-09    | 5.72E-13    | 1.01E-07 | 1           | 1.42E-04 |
| phe.Fasting_rs182714699S8 | DIAPH1 | rs75506779 S5  | TMCO3     | 5.55E-07 | 1           | 3.61E-04    | 1.10E-08 | 0.449707    | 2.03E-05 |

|                           |        |             |     |            |          |             |          |          |             |          |
|---------------------------|--------|-------------|-----|------------|----------|-------------|----------|----------|-------------|----------|
| phe.Fasting_rs182714699S8 | DIAPH1 | rs75758702  | S24 | NA         | 7.02E-17 | 2.87E-09    | 3.16E-13 | 1.57E-10 | 0.00638323  | 4.59E-07 |
| phe.Fasting_rs182714699S8 | DIAPH1 | rs75864203  | S8  | CNTLN      | 1.47E-16 | 6.01E-09    | 5.72E-13 | 1.01E-07 | 1           | 1.42E-04 |
| phe.Fasting_rs182714699S8 | DIAPH1 | rs75949566  | S5  | TMEM64     | 2.76E-06 | 1.00E+00    | 1.47E-03 | 8.48E-11 | 0.00345267  | 2.62E-07 |
| phe.Fasting_rs182714699S8 | DIAPH1 | rs76844308  | S8  | CNTLN      | 7.68E-17 | 3.14E-09    | 3.41E-13 | 9.52E-08 | 1           | 1.35E-04 |
| phe.Fasting_rs182714699S8 | DIAPH1 | rs7763107   | S8  | FARS2      | 5.78E-16 | 2.36E-08    | 1.79E-12 | 9.23E-12 | 0.000375564 | 3.44E-08 |
| phe.Fasting_rs182714699S8 | DIAPH1 | rs77798597  | S7  | KPNA3      | 2.97E-15 | 1.21E-07    | 8.14E-12 | 1.09E-13 | 4.44E-06    | 6.79E-10 |
| phe.Fasting_rs182714699S8 | DIAPH1 | rs77845645  | S21 | NA         | 1.53E-06 | 1.00E+00    | 8.88E-04 | 4.20E-11 | 0.00170882  | 1.38E-07 |
| phe.Fasting_rs182714699S8 | DIAPH1 | rs78353402  | S8  | AP3M2      | 4.51E-15 | 1.84E-07    | 1.18E-11 | 3.87E-07 | 1           | 4.75E-04 |
| phe.Fasting_rs182714699S8 | DIAPH1 | rs78516788  | S8  | SLC38A1    | 2.75E-11 | 1.12E-03    | 3.94E-08 | 2.44E-10 | 0.00992686  | 6.74E-07 |
| phe.Fasting_rs182714699S8 | DIAPH1 | rs78697063  | S5  | MSI2       | 8.23E-19 | 3.36E-11    | 2.70E-14 | 6.84E-10 | 0.0278369   | 1.70E-06 |
| phe.Fasting_rs182714699S8 | DIAPH1 | rs78722272  | S5  | CNTLN      | 1.47E-16 | 6.01E-09    | 5.72E-13 | 1.05E-07 | 1           | 1.48E-04 |
| phe.Fasting_rs182714699S8 | DIAPH1 | rs78736524  | S5  | KPNA3      | 2.97E-15 | 1.21E-07    | 8.14E-12 | 1.18E-13 | 4.80E-06    | 7.06E-10 |
| phe.Fasting_rs182714699S8 | DIAPH1 | rs78990344  | S2  | LOC1005063 | 2.37E-06 | 1.00E+00    | 1.30E-03 | 6.78E-11 | 0.00276161  | 2.13E-07 |
| phe.Fasting_rs182714699S8 | DIAPH1 | rs79781495  | S8  | KPNA3      | 2.97E-15 | 1.21E-07    | 8.14E-12 | 1.09E-13 | 4.44E-06    | 6.79E-10 |
| phe.Fasting_rs182714699S8 | DIAPH1 | rs79886603  | S15 | NA         | 8.71E-08 | 1           | 6.74E-05 | 4.66E-07 | 1           | 5.59E-04 |
| phe.Fasting_rs182714699S8 | DIAPH1 | rs80200953  | S8  | PPP2R5D    | 8.49E-17 | 3.47E-09    | 3.69E-13 | 3.65E-09 | 0.148399    | 7.55E-06 |
| phe.Fasting_rs182714699S8 | DIAPH1 | rs80332465  | S5  | KPNA3      | 3.13E-15 | 1.28E-07    | 8.51E-12 | 1.17E-13 | 4.77E-06    | 7.06E-10 |
| phe.Fasting_rs182714699S8 | DIAPH1 | rs80334773  | S5  | KPNA3      | 3.13E-15 | 1.28E-07    | 8.51E-12 | 1.17E-13 | 4.77E-06    | 7.06E-10 |
| phe.Fasting_rs182958142S8 | DIAPH1 | rs111576333 | S5  | TMEM64     | 1.52E-06 | 1           | 8.84E-04 | 1.03E-11 | 0.000417355 | 3.79E-08 |
| phe.Fasting_rs182958142S8 | DIAPH1 | rs112089881 | S8  | ZFAND4     | 9.56E-18 | 3.90E-10    | 9.45E-14 | 5.16E-10 | 0.0209834   | 1.33E-06 |
| phe.Fasting_rs182958142S8 | DIAPH1 | rs112091318 | S5  | TMEM64     | 4.42E-07 | 1           | 2.93E-04 | 3.61E-09 | 0.14702     | 7.50E-06 |
| phe.Fasting_rs182958142S8 | DIAPH1 | rs114565620 | S8  | RCL1       | 5.44E-17 | 2.22E-09    | 2.64E-13 | 3.20E-09 | 0.130414    | 6.74E-06 |
| phe.Fasting_rs182958142S8 | DIAPH1 | rs115787552 | S5  | KPNA3      | 1.65E-15 | 6.72E-08    | 4.71E-12 | 3.62E-08 | 1           | 5.74E-05 |
| phe.Fasting_rs182958142S8 | DIAPH1 | rs115888477 | S8  | NA         | 1.19E-14 | 4.86E-07    | 3.03E-11 | 5.15E-09 | 0.209815    | 1.02E-05 |
| phe.Fasting_rs182958142S8 | DIAPH1 | rs116011837 | S9  | BRD2       | 4.39E-11 | 0.00179086  | 5.99E-08 | 2.32E-14 | 9.45E-07    | 1.79E-10 |
| phe.Fasting_rs182958142S8 | DIAPH1 | rs116079984 | S8  | KPNA3      | 1.65E-15 | 6.72E-08    | 4.71E-12 | 1.63E-10 | 0.00662252  | 4.74E-07 |
| phe.Fasting_rs182958142S8 | DIAPH1 | rs116120727 | S9  | BRD2       | 4.39E-11 | 0.00179086  | 5.99E-08 | 2.32E-14 | 9.45E-07    | 1.79E-10 |
| phe.Fasting_rs182958142S8 | DIAPH1 | rs116548615 | S8  | TMEM45B    | 8.54E-17 | 3.49E-09    | 3.71E-13 | 5.83E-13 | 2.37E-05    | 2.88E-09 |
| phe.Fasting_rs182958142S8 | DIAPH1 | rs11989304  | S4  | TMEM64     | 1.52E-06 | 1           | 8.84E-04 | 8.87E-10 | 0.0361204   | 2.13E-06 |
| phe.Fasting_rs182958142S8 | DIAPH1 | rs140524622 | S7  | MRPL10     | 6.16E-17 | 2.52E-09    | 2.86E-13 | 9.75E-06 | 1           | 8.00E-03 |
| phe.Fasting_rs182958142S8 | DIAPH1 | rs146815317 | S5  | KPNA3      | 1.65E-15 | 6.72E-08    | 4.71E-12 | 3.62E-08 | 1           | 5.74E-05 |
| phe.Fasting_rs182958142S8 | DIAPH1 | rs150117838 | S8  | KPNA3      | 1.65E-15 | 6.72E-08    | 4.71E-12 | 3.19E-08 | 1           | 5.11E-05 |
| phe.Fasting_rs182958142S8 | DIAPH1 | rs150916187 | S4  | HIST1H2BK  | 1.13E-05 | 1           | 5.10E-03 | 1.54E-15 | 6.29E-08    | 1.72E-11 |
| phe.Fasting_rs182958142S8 | DIAPH1 | rs16894241  | S4  | HIST1H2BK  | 1.70E-11 | 0.000696087 | 2.59E-08 | 3.83E-15 | 1.56E-07    | 3.60E-11 |
| phe.Fasting_rs182958142S8 | DIAPH1 | rs4732511   | S13 | POR        | 1.26E-14 | 5.14E-07    | 3.19E-11 | 4.20E-08 | 1           | 6.56E-05 |
| phe.Fasting_rs182958142S8 | DIAPH1 | rs57503635  | S3  | NA         | 3.25E-16 | 1.33E-08    | 1.08E-12 | 2.33E-15 | 9.50E-08    | 2.30E-11 |
| phe.Fasting_rs182958142S8 | DIAPH1 | rs6964407   | S7  | POR        | 4.41E-14 | 1.80E-06    | 1.05E-10 | 3.76E-08 | 1           | 5.93E-05 |
| phe.Fasting_rs182958142S8 | DIAPH1 | rs7256517   | S7  | CYTH2      | 7.73E-16 | 3.15E-08    | 2.35E-12 | 1.59E-10 | 0.00645569  | 4.63E-07 |
| phe.Fasting_rs182958142S8 | DIAPH1 | rs73619637  | S8  | NA         | 6.36E-16 | 2.60E-08    | 1.95E-12 | 1.99E-09 | 0.0810822   | 4.40E-06 |
| phe.Fasting_rs182958142S8 | DIAPH1 | rs74627895  | S8  | TMEM64     | 4.42E-07 | 1.00E+00    | 2.93E-04 | 1.69E-09 | 0.0688053   | 3.80E-06 |

|                            |        |                 |             |          |             |             |          |            |          |
|----------------------------|--------|-----------------|-------------|----------|-------------|-------------|----------|------------|----------|
| phe.Fasting_rs182958142 S8 | DIAPH1 | rs75350765 S5   | RCL1        | 5.44E-17 | 2.22E-09    | 2.64E-13    | 3.20E-09 | 0.130414   | 6.74E-06 |
| phe.Fasting_rs182958142 S8 | DIAPH1 | rs75374128 S5   | CNTLN       | 1.59E-09 | 0.0648157   | 1.68E-06    | 6.33E-07 | 1          | 7.44E-04 |
| phe.Fasting_rs182958142 S8 | DIAPH1 | rs75758702 S24  | NA          | 1.79E-09 | 0.0732905   | 1.89E-06    | 4.90E-11 | 0.00199267 | 1.58E-07 |
| phe.Fasting_rs182958142 S8 | DIAPH1 | rs75864203 S8   | CNTLN       | 1.59E-09 | 0.0648157   | 1.68E-06    | 6.33E-07 | 1          | 7.44E-04 |
| phe.Fasting_rs182958142 S8 | DIAPH1 | rs75949566 S5   | TMEM64      | 1.72E-06 | 1           | 9.81E-04    | 1.80E-09 | 0.0732767  | 4.01E-06 |
| phe.Fasting_rs182958142 S8 | DIAPH1 | rs76844308 S8   | CNTLN       | 7.15E-10 | 0.0291815   | 7.96E-07    | 6.64E-07 | 1          | 7.77E-04 |
| phe.Fasting_rs182958142 S8 | DIAPH1 | rs7763107 S8    | FARS2       | 4.25E-06 | 1           | 2.16E-03    | 4.71E-08 | 1          | 7.27E-05 |
| phe.Fasting_rs182958142 S8 | DIAPH1 | rs77798597 S7   | KPNA3       | 1.65E-15 | 6.72E-08    | 4.71E-12    | 3.19E-08 | 1          | 5.11E-05 |
| phe.Fasting_rs182958142 S8 | DIAPH1 | rs77845645 S21  | NA          | 8.48E-07 | 1           | 5.23E-04    | 1.02E-09 | 0.041399   | 2.41E-06 |
| phe.Fasting_rs182958142 S8 | DIAPH1 | rs78516788 S8   | SLC38A1     | 2.40E-11 | 0.000981335 | 3.50E-08    | 7.50E-09 | 0.305182   | 1.44E-05 |
| phe.Fasting_rs182958142 S8 | DIAPH1 | rs78697063 S5   | MSI2        | 2.58E-19 | 1.05E-11    | 2.40E-14    | 4.33E-08 | 1          | 6.74E-05 |
| phe.Fasting_rs182958142 S8 | DIAPH1 | rs78722272 S5   | CNTLN       | 1.59E-09 | 0.0648157   | 1.68E-06    | 6.60E-07 | 1          | 7.73E-04 |
| phe.Fasting_rs182958142 S8 | DIAPH1 | rs78736524 S5   | KPNA3       | 1.65E-15 | 6.72E-08    | 4.71E-12    | 3.62E-08 | 1          | 5.74E-05 |
| phe.Fasting_rs182958142 S8 | DIAPH1 | rs78990344 S2   | LOC10050631 | 1.52E-06 | 1           | 8.84E-04    | 8.87E-10 | 0.0361204  | 2.13E-06 |
| phe.Fasting_rs182958142 S8 | DIAPH1 | rs79781495 S8   | KPNA3       | 1.65E-15 | 6.72E-08    | 4.71E-12    | 3.19E-08 | 1          | 5.11E-05 |
| phe.Fasting_rs182958142 S8 | DIAPH1 | rs80200953 S8   | PPP2R5D     | 3.97E-17 | 1.62E-09    | 2.13E-13    | 9.45E-07 | 1          | 1.07E-03 |
| phe.Fasting_rs182958142 S8 | DIAPH1 | rs80332465 S5   | KPNA3       | 1.75E-15 | 7.15E-08    | 5.00E-12    | 3.74E-08 | 1          | 5.90E-05 |
| phe.Fasting_rs182958142 S8 | DIAPH1 | rs80334773 S5   | KPNA3       | 1.75E-15 | 7.15E-08    | 5.00E-12    | 3.74E-08 | 1          | 5.90E-05 |
| phe.Fasting_rs182965141 S8 | DIAPH1 | rs111576333 S5  | TMEM64      | 6.58E-07 | 1.00E+00    | 4.19E-04    | 2.49E-12 | 0.00010149 | 1.07E-08 |
| phe.Fasting_rs182965141 S8 | DIAPH1 | rs112089881 S8  | ZFAND4      | 4.45E-18 | 1.82E-10    | 6.40E-14    | 4.37E-11 | 0.00177999 | 1.43E-07 |
| phe.Fasting_rs182965141 S8 | DIAPH1 | rs112091318 S5  | TMEM64      | 1.96E-07 | 1.00E+00    | 1.40E-04    | 5.53E-08 | 1          | 8.40E-05 |
| phe.Fasting_rs182965141 S8 | DIAPH1 | rs114334325 S7  | AP3M2       | 1.79E-15 | 7.30E-08    | 5.11E-12    | 4.07E-08 | 1          | 6.36E-05 |
| phe.Fasting_rs182965141 S8 | DIAPH1 | rs114394395 S7  | AP3M2       | 1.91E-15 | 7.78E-08    | 5.43E-12    | 4.07E-08 | 1          | 6.36E-05 |
| phe.Fasting_rs182965141 S8 | DIAPH1 | rs114565620 S8  | RCL1        | 2.74E-17 | 1.12E-09    | 1.64E-13    | 5.40E-07 | 1          | 6.42E-04 |
| phe.Fasting_rs182965141 S8 | DIAPH1 | rs115083290 S19 | NA          | 1.09E-16 | 4.45E-09    | 4.59E-13    | 7.39E-10 | 0.0300678  | 1.83E-06 |
| phe.Fasting_rs182965141 S8 | DIAPH1 | rs115752779 S19 | NA          | 1.09E-16 | 4.45E-09    | 4.59E-13    | 7.39E-10 | 0.0300678  | 1.83E-06 |
| phe.Fasting_rs182965141 S8 | DIAPH1 | rs115787552 S5  | KPNA3       | 6.69E-16 | 2.73E-08    | 2.05E-12    | 5.19E-15 | 2.11E-07   | 4.77E-11 |
| phe.Fasting_rs182965141 S8 | DIAPH1 | rs115888477 S8  | NA          | 4.74E-15 | 1.94E-07    | 1.24E-11    | 8.30E-16 | 3.38E-08   | 1.16E-11 |
| phe.Fasting_rs182965141 S8 | DIAPH1 | rs116011837 S9  | BRD2        | 1.24E-11 | 0.000507427 | 1.94E-08    | 1.84E-15 | 7.47E-08   | 2.00E-11 |
| phe.Fasting_rs182965141 S8 | DIAPH1 | rs116079984 S8  | KPNA3       | 6.69E-16 | 2.73E-08    | 2.05E-12    | 5.75E-15 | 2.34E-07   | 5.25E-11 |
| phe.Fasting_rs182965141 S8 | DIAPH1 | rs116120727 S9  | BRD2        | 1.24E-11 | 0.000507427 | 1.94E-08    | 1.84E-15 | 7.47E-08   | 2.00E-11 |
| phe.Fasting_rs182965141 S8 | DIAPH1 | rs116406581 S2  | NA          | 8.22E-15 | 3.36E-07    | 2.10E-11    | 2.33E-08 | 0.947819   | 3.87E-05 |
| phe.Fasting_rs182965141 S8 | DIAPH1 | rs116548615 S8  | TMEM45B     | 4.49E-17 | 1.83E-09    | 2.29E-13    | 3.95E-13 | 1.61E-05   | 2.13E-09 |
| phe.Fasting_rs182965141 S8 | DIAPH1 | rs116696844 S3  | AP3M2       | 2.68E-15 | 1.09E-07    | 7.51E-12    | 4.07E-08 | 1          | 6.36E-05 |
| phe.Fasting_rs182965141 S8 | DIAPH1 | rs11989304 S4   | TMEM64      | 6.58E-07 | 1           | 0.000419199 | 3.02E-10 | 0.0123046  | 8.16E-07 |
| phe.Fasting_rs182965141 S8 | DIAPH1 | rs140524622 S7  | MRPL10      | 2.43E-17 | 9.92E-10    | 1.52E-13    | 1.07E-06 | 1          | 1.20E-03 |
| phe.Fasting_rs182965141 S8 | DIAPH1 | rs146815317 S5  | KPNA3       | 6.69E-16 | 2.73E-08    | 2.05E-12    | 5.19E-15 | 2.11E-07   | 4.77E-11 |
| phe.Fasting_rs182965141 S8 | DIAPH1 | rs150117838 S8  | KPNA3       | 6.69E-16 | 2.73E-08    | 2.05E-12    | 4.80E-15 | 1.95E-07   | 4.44E-11 |
| phe.Fasting_rs182965141 S8 | DIAPH1 | rs150916187 S4  | HIST1H2BK   | 4.92E-06 | 1           | 0.00245471  | 5.78E-16 | 2.35E-08   | 1.16E-11 |
| phe.Fasting_rs182965141 S8 | DIAPH1 | rs16894241 S4   | HIST1H2BK   | 5.06E-12 | 0.000206577 | 9.00E-09    | 1.66E-15 | 6.76E-08   | 1.84E-11 |

|                            |        |                 |             |          |             |             |          |             |          |
|----------------------------|--------|-----------------|-------------|----------|-------------|-------------|----------|-------------|----------|
| phe.Fasting_rs182965141 S8 | DIAPH1 | rs34801978 S3   | HOXB2       | 2.43E-06 | 1           | 0.00132002  | 4.55E-09 | 0.185282    | 9.15E-06 |
| phe.Fasting_rs182965141 S8 | DIAPH1 | rs4732511 S13   | POR         | 8.79E-15 | 3.59E-07    | 2.25E-11    | 3.54E-07 | 1           | 4.40E-04 |
| phe.Fasting_rs182965141 S8 | DIAPH1 | rs57503635 S3   | NA          | 1.66E-16 | 6.79E-09    | 6.03E-13    | 2.32E-15 | 9.45E-08    | 2.29E-11 |
| phe.Fasting_rs182965141 S8 | DIAPH1 | rs60011869 S16  | NA          | 2.27E-06 | 1           | 0.00124823  | 5.94E-08 | 1           | 8.97E-05 |
| phe.Fasting_rs182965141 S8 | DIAPH1 | rs6964407 S7    | POR         | 3.24E-14 | 1.32E-06    | 7.87E-11    | 3.23E-07 | 1           | 4.05E-04 |
| phe.Fasting_rs182965141 S8 | DIAPH1 | rs7004597 S8    | NA          | 1.79E-15 | 7.30E-08    | 5.11E-12    | 2.21E-08 | 0.899461    | 3.74E-05 |
| phe.Fasting_rs182965141 S8 | DIAPH1 | rs7256517 S7    | CYTH2       | 2.17E-16 | 8.84E-09    | 7.40E-13    | 2.24E-13 | 9.10E-06    | 1.24E-09 |
| phe.Fasting_rs182965141 S8 | DIAPH1 | rs73283603 S7   | ZWINT       | 4.89E-07 | 1           | 0.000321768 | 1.65E-08 | 0.673631    | 2.90E-05 |
| phe.Fasting_rs182965141 S8 | DIAPH1 | rs73392640 S8   | POLR3B      | 5.86E-11 | 0.00239099  | 7.87E-08    | 1.80E-12 | 7.33E-05    | 7.89E-09 |
| phe.Fasting_rs182965141 S8 | DIAPH1 | rs73619637 S8   | NA          | 2.73E-16 | 1.11E-08    | 9.16E-13    | 1.81E-08 | 0.738748    | 3.15E-05 |
| phe.Fasting_rs182965141 S8 | DIAPH1 | rs74627895 S8   | TMEM64      | 1.96E-07 | 1           | 0.000140264 | 2.52E-08 | 1           | 4.14E-05 |
| phe.Fasting_rs182965141 S8 | DIAPH1 | rs74914207 S24  | NA          | 3.56E-11 | 0.00145284  | 4.96E-08    | 4.17E-12 | 0.000169874 | 1.68E-08 |
| phe.Fasting_rs182965141 S8 | DIAPH1 | rs75350765 S5   | RCL1        | 2.74E-17 | 1.12E-09    | 1.64E-13    | 5.40E-07 | 1           | 6.42E-04 |
| phe.Fasting_rs182965141 S8 | DIAPH1 | rs75374128 S5   | CNTLN       | 5.48E-06 | 1           | 0.00269684  | 4.49E-09 | 0.182692    | 9.06E-06 |
| phe.Fasting_rs182965141 S8 | DIAPH1 | rs75506779 S5   | TMCO3       | 1.25E-07 | 1           | 9.30E-05    | 8.17E-10 | 0.0332637   | 1.99E-06 |
| phe.Fasting_rs182965141 S8 | DIAPH1 | rs75758702 S24  | NA          | 3.26E-17 | 1.33E-09    | 1.82E-13    | 2.96E-12 | 0.0001205   | 1.26E-08 |
| phe.Fasting_rs182965141 S8 | DIAPH1 | rs75864203 S8   | CNTLN       | 5.48E-06 | 1           | 0.00269684  | 4.49E-09 | 0.182692    | 9.06E-06 |
| phe.Fasting_rs182965141 S8 | DIAPH1 | rs75949566 S5   | TMEM64      | 7.74E-07 | 1           | 0.000482917 | 4.00E-10 | 0.0162952   | 1.05E-06 |
| phe.Fasting_rs182965141 S8 | DIAPH1 | rs76844308 S8   | CNTLN       | 2.78E-06 | 1           | 0.00148019  | 7.77E-09 | 0.31611     | 1.49E-05 |
| phe.Fasting_rs182965141 S8 | DIAPH1 | rs7763107 S8    | FARS2       | 1.61E-16 | 6.58E-09    | 6.03E-13    | 3.34E-13 | 1.36E-05    | 1.81E-09 |
| phe.Fasting_rs182965141 S8 | DIAPH1 | rs77798597 S7   | KPNA3       | 6.69E-16 | 2.73E-08    | 2.05E-12    | 4.80E-15 | 1.95E-07    | 4.44E-11 |
| phe.Fasting_rs182965141 S8 | DIAPH1 | rs77845645 S21  | NA          | 3.86E-07 | 1           | 0.000261363 | 2.90E-12 | 0.000118021 | 1.23E-08 |
| phe.Fasting_rs182965141 S8 | DIAPH1 | rs78353402 S8   | AP3M2       | 1.79E-15 | 7.30E-08    | 5.11E-12    | 4.07E-08 | 1           | 6.36E-05 |
| phe.Fasting_rs182965141 S8 | DIAPH1 | rs78516788 S8   | SLC38A1     | 1.44E-06 | 1           | 8.44E-04    | 3.82E-10 | 0.0155585   | 1.01E-06 |
| phe.Fasting_rs182965141 S8 | DIAPH1 | rs78697063 S5   | MSI2        | 1.17E-19 | 4.76E-12    | 2.23E-14    | 4.64E-08 | 1           | 7.17E-05 |
| phe.Fasting_rs182965141 S8 | DIAPH1 | rs78703708 S7   | FAF2        | 9.02E-12 | 0.000368188 | 1.48E-08    | 1.07E-05 | 1           | 8.63E-03 |
| phe.Fasting_rs182965141 S8 | DIAPH1 | rs78722272 S5   | CNTLN       | 5.48E-06 | 1           | 2.70E-03    | 4.62E-09 | 0.187916    | 9.25E-06 |
| phe.Fasting_rs182965141 S8 | DIAPH1 | rs78736524 S5   | KPNA3       | 6.69E-16 | 2.73E-08    | 2.05E-12    | 5.19E-15 | 2.11E-07    | 4.77E-11 |
| phe.Fasting_rs182965141 S8 | DIAPH1 | rs78990344 S2   | LOC10050631 | 6.58E-07 | 1           | 0.000419199 | 3.02E-10 | 0.0123046   | 8.16E-07 |
| phe.Fasting_rs182965141 S8 | DIAPH1 | rs79781495 S8   | KPNA3       | 6.69E-16 | 2.73E-08    | 2.05E-12    | 4.80E-15 | 1.95E-07    | 4.44E-11 |
| phe.Fasting_rs182965141 S8 | DIAPH1 | rs80200953 S8   | PPP2R5D     | 1.93E-17 | 7.87E-10    | 1.39E-13    | 2.89E-10 | 0.0117656   | 7.87E-07 |
| phe.Fasting_rs182965141 S8 | DIAPH1 | rs80332465 S5   | KPNA3       | 7.09E-16 | 2.89E-08    | 2.17E-12    | 5.17E-15 | 2.10E-07    | 4.75E-11 |
| phe.Fasting_rs182965141 S8 | DIAPH1 | rs80334773 S5   | KPNA3       | 7.09E-16 | 2.89E-08    | 2.17E-12    | 5.17E-15 | 2.10E-07    | 4.75E-11 |
| phe.Fasting_rs183597049 S7 | DIAPH1 | rs111576333 S5  | TMEM64      | 2.37E-06 | 1           | 0.00129547  | 5.87E-14 | 2.39E-06    | 3.99E-10 |
| phe.Fasting_rs183597049 S7 | DIAPH1 | rs112089881 S8  | ZFAND4      | 2.04E-17 | 8.32E-10    | 1.43E-13    | 1.09E-09 | 0.0445256   | 2.58E-06 |
| phe.Fasting_rs183597049 S7 | DIAPH1 | rs112091318 S5  | TMEM64      | 7.32E-07 | 1           | 0.000459899 | 3.91E-08 | 1           | 6.13E-05 |
| phe.Fasting_rs183597049 S7 | DIAPH1 | rs114334325 S7  | AP3M2       | 4.51E-15 | 1.84E-07    | 1.18E-11    | 3.87E-07 | 1           | 4.75E-04 |
| phe.Fasting_rs183597049 S7 | DIAPH1 | rs114394395 S7  | AP3M2       | 4.81E-15 | 1.97E-07    | 1.25E-11    | 3.87E-07 | 1           | 4.75E-04 |
| phe.Fasting_rs183597049 S7 | DIAPH1 | rs114565620 S8  | RCL1        | 1.82E-16 | 7.42E-09    | 6.37E-13    | 3.70E-08 | 1           | 5.84E-05 |
| phe.Fasting_rs183597049 S7 | DIAPH1 | rs115083290 S19 | NA          | 4.38E-16 | 1.79E-08    | 1.40E-12    | 1.42E-08 | 0.576679    | 2.53E-05 |

|                           |        |                |           |          |            |             |          |             |          |
|---------------------------|--------|----------------|-----------|----------|------------|-------------|----------|-------------|----------|
| phe.Fasting_rs183597049S7 | DIAPH1 | rs11524145 S5  | CDK6      | 7.80E-07 | 1.00E+00   | 4.86E-04    | 7.89E-06 | 1           | 6.69E-03 |
| phe.Fasting_rs183597049S7 | DIAPH1 | rs115752779S19 | NA        | 4.38E-16 | 1.79E-08   | 1.40E-12    | 1.42E-08 | 0.576679    | 2.53E-05 |
| phe.Fasting_rs183597049S7 | DIAPH1 | rs115787552S5  | KPNA3     | 2.97E-15 | 1.21E-07   | 8.14E-12    | 1.18E-13 | 4.80E-06    | 7.06E-10 |
| phe.Fasting_rs183597049S7 | DIAPH1 | rs115888477S8  | NA        | 2.03E-14 | 8.28E-07   | 5.02E-11    | 2.21E-14 | 8.99E-07    | 1.73E-10 |
| phe.Fasting_rs183597049S7 | DIAPH1 | rs116011837S9  | BRD2      | 4.89E-11 | 2.00E-03   | 6.62E-08    | 4.07E-14 | 1.66E-06    | 2.85E-10 |
| phe.Fasting_rs183597049S7 | DIAPH1 | rs116079984S8  | KPNA3     | 2.97E-15 | 1.21E-07   | 8.14E-12    | 1.24E-13 | 5.04E-06    | 7.34E-10 |
| phe.Fasting_rs183597049S7 | DIAPH1 | rs116120727S9  | BRD2      | 4.89E-11 | 2.00E-03   | 6.62E-08    | 4.07E-14 | 1.66E-06    | 2.85E-10 |
| phe.Fasting_rs183597049S7 | DIAPH1 | rs116406581S2  | NA        | 1.81E-14 | 7.39E-07   | 4.52E-11    | 2.35E-07 | 1           | 3.05E-04 |
| phe.Fasting_rs183597049S7 | DIAPH1 | rs116548615S8  | TMEM45B   | 1.73E-16 | 7.06E-09   | 6.15E-13    | 8.70E-12 | 0.000354153 | 3.26E-08 |
| phe.Fasting_rs183597049S7 | DIAPH1 | rs116696844S3  | AP3M2     | 6.92E-15 | 2.83E-07   | 1.78E-11    | 3.87E-07 | 1           | 4.75E-04 |
| phe.Fasting_rs183597049S7 | DIAPH1 | rs11989304 S4  | TMEM64    | 2.37E-06 | 1.00E+00   | 1.30E-03    | 6.78E-11 | 0.00276161  | 2.13E-07 |
| phe.Fasting_rs183597049S7 | DIAPH1 | rs140524622S7  | MRPL10    | 1.08E-16 | 4.41E-09   | 4.54E-13    | 7.35E-06 | 1           | 6.31E-03 |
| phe.Fasting_rs183597049S7 | DIAPH1 | rs146815317S5  | KPNA3     | 2.97E-15 | 1.21E-07   | 8.14E-12    | 1.18E-13 | 4.80E-06    | 7.06E-10 |
| phe.Fasting_rs183597049S7 | DIAPH1 | rs150117838S8  | KPNA3     | 2.97E-15 | 1.21E-07   | 8.14E-12    | 1.09E-13 | 4.44E-06    | 6.79E-10 |
| phe.Fasting_rs183597049S7 | DIAPH1 | rs150916187S4  | HIST1H2BK | 1.38E-05 | 1.00E+00   | 6.05E-03    | 1.37E-14 | 5.59E-07    | 1.16E-10 |
| phe.Fasting_rs183597049S7 | DIAPH1 | rs16894241 S4  | HIST1H2BK | 1.99E-11 | 8.12E-04   | 2.96E-08    | 3.44E-14 | 1.40E-06    | 2.50E-10 |
| phe.Fasting_rs183597049S7 | DIAPH1 | rs2032062 S8   | NA        | 1.22E-14 | 4.98E-07   | 3.09E-11    | 8.48E-06 | 1           | 7.14E-03 |
| phe.Fasting_rs183597049S7 | DIAPH1 | rs2153597 S8   | ZNF438    | 5.51E-11 | 2.25E-03   | 7.42E-08    | 4.52E-09 | 0.183916    | 9.08E-06 |
| phe.Fasting_rs183597049S7 | DIAPH1 | rs2835656 S7   | TTC3      | 3.01E-10 | 1.23E-02   | 3.60E-07    | 9.12E-06 | 1           | 7.57E-03 |
| phe.Fasting_rs183597049S7 | DIAPH1 | rs34801978 S3  | HOXB2     | 1.23E-05 | 1.00E+00   | 5.46E-03    | 1.03E-08 | 0.419057    | 1.90E-05 |
| phe.Fasting_rs183597049S7 | DIAPH1 | rs352346 S3    | GRPEL2    | 1.85E-11 | 7.55E-04   | 2.78E-08    | 8.42E-06 | 1           | 7.10E-03 |
| phe.Fasting_rs183597049S7 | DIAPH1 | rs3750898 S8   | DCLRE1A   | 2.29E-05 | 1.00E+00   | 9.35E-03    | 8.76E-06 | 1           | 7.32E-03 |
| phe.Fasting_rs183597049S7 | DIAPH1 | rs4732511 S13  | POR       | 2.30E-15 | 9.39E-08   | 6.48E-12    | 9.65E-06 | 1           | 7.93E-03 |
| phe.Fasting_rs183597049S7 | DIAPH1 | rs57503635 S3  | NA        | 6.34E-16 | 2.59E-08   | 1.95E-12    | 3.17E-14 | 1.29E-06    | 2.34E-10 |
| phe.Fasting_rs183597049S7 | DIAPH1 | rs58905476 S7  | TTC3      | 3.29E-10 | 0.0134302  | 3.90E-07    | 9.79E-06 | 1           | 8.01E-03 |
| phe.Fasting_rs183597049S7 | DIAPH1 | rs60011869 S16 | NA        | 1.04E-05 | 1.00E+00   | 4.72E-03    | 8.16E-10 | 0.0332257   | 1.98E-06 |
| phe.Fasting_rs183597049S7 | DIAPH1 | rs6964407 S7   | POR       | 7.55E-15 | 3.08E-07   | 1.94E-11    | 8.91E-06 | 1           | 7.43E-03 |
| phe.Fasting_rs183597049S7 | DIAPH1 | rs7004597 S8   | NA        | 4.51E-15 | 1.84E-07   | 1.18E-11    | 2.34E-07 | 1           | 3.04E-04 |
| phe.Fasting_rs183597049S7 | DIAPH1 | rs7256517 S7   | CYTH2     | 1.04E-15 | 4.24E-08   | 3.06E-12    | 4.82E-12 | 0.000196022 | 1.91E-08 |
| phe.Fasting_rs183597049S7 | DIAPH1 | rs73283603 S7  | ZWINT     | 1.90E-06 | 1.00E+00   | 1.07E-03    | 2.03E-07 | 1           | 2.68E-04 |
| phe.Fasting_rs183597049S7 | DIAPH1 | rs73392640 S8  | POLR3B    | 2.02E-10 | 0.00826001 | 2.49E-07    | 5.19E-11 | 0.00211214  | 1.67E-07 |
| phe.Fasting_rs183597049S7 | DIAPH1 | rs734069 S19   | NA        | 2.06E-08 | 0.839421   | 1.81E-05    | 6.71E-10 | 0.0272994   | 1.68E-06 |
| phe.Fasting_rs183597049S7 | DIAPH1 | rs73619637 S8  | NA        | 1.44E-15 | 5.89E-08   | 4.14E-12    | 2.05E-10 | 0.00833668  | 5.78E-07 |
| phe.Fasting_rs183597049S7 | DIAPH1 | rs74627895 S8  | TMEM64    | 7.32E-07 | 1          | 0.000459899 | 2.03E-08 | 0.828094    | 3.48E-05 |
| phe.Fasting_rs183597049S7 | DIAPH1 | rs74914207 S24 | NA        | 1.37E-10 | 0.00558626 | 1.73E-07    | 9.12E-11 | 0.0037135   | 2.80E-07 |
| phe.Fasting_rs183597049S7 | DIAPH1 | rs75350765 S5  | RCL1      | 1.82E-16 | 7.42E-09   | 6.37E-13    | 3.70E-08 | 1           | 5.84E-05 |
| phe.Fasting_rs183597049S7 | DIAPH1 | rs75374128 S5  | CNTLN     | 1.47E-16 | 6.01E-09   | 5.72E-13    | 1.01E-07 | 1           | 1.42E-04 |
| phe.Fasting_rs183597049S7 | DIAPH1 | rs75506779 S5  | TMCO3     | 5.55E-07 | 1          | 3.61E-04    | 1.10E-08 | 0.449707    | 2.03E-05 |
| phe.Fasting_rs183597049S7 | DIAPH1 | rs75758702 S24 | NA        | 7.02E-17 | 2.87E-09   | 3.16E-13    | 1.57E-10 | 0.00638323  | 4.59E-07 |
| phe.Fasting_rs183597049S7 | DIAPH1 | rs75864203 S8  | CNTLN     | 1.47E-16 | 6.01E-09   | 5.72E-13    | 1.01E-07 | 1           | 1.42E-04 |



|                           |        |                |             |          |             |            |          |             |          |
|---------------------------|--------|----------------|-------------|----------|-------------|------------|----------|-------------|----------|
| phe.Fasting_rs183597049S7 | DIAPH1 | rs75949566 S5  | TMEM64      | 2.76E-06 | 1           | 1.47E-03   | 8.48E-11 | 0.00345267  | 2.62E-07 |
| phe.Fasting_rs183597049S7 | DIAPH1 | rs76844308 S8  | CNTLN       | 7.68E-17 | 3.14E-09    | 3.41E-13   | 9.52E-08 | 1           | 1.35E-04 |
| phe.Fasting_rs183597049S7 | DIAPH1 | rs7763107 S8   | FARS2       | 5.78E-16 | 2.36E-08    | 1.79E-12   | 9.23E-12 | 0.000375564 | 3.44E-08 |
| phe.Fasting_rs183597049S7 | DIAPH1 | rs77798597 S7  | KPNA3       | 2.97E-15 | 1.21E-07    | 8.14E-12   | 1.09E-13 | 4.44E-06    | 6.79E-10 |
| phe.Fasting_rs183597049S7 | DIAPH1 | rs77845645 S21 | NA          | 1.53E-06 | 1           | 8.88E-04   | 4.20E-11 | 0.00170882  | 1.38E-07 |
| phe.Fasting_rs183597049S7 | DIAPH1 | rs78353402 S8  | AP3M2       | 4.51E-15 | 1.84E-07    | 1.18E-11   | 3.87E-07 | 1           | 4.75E-04 |
| phe.Fasting_rs183597049S7 | DIAPH1 | rs78516788 S8  | SLC38A1     | 2.75E-11 | 0.00112269  | 3.94E-08   | 2.44E-10 | 0.00992686  | 6.74E-07 |
| phe.Fasting_rs183597049S7 | DIAPH1 | rs78697063 S5  | MSI2        | 8.23E-19 | 3.36E-11    | 2.70E-14   | 6.84E-10 | 0.0278369   | 1.70E-06 |
| phe.Fasting_rs183597049S7 | DIAPH1 | rs78722272 S5  | CNTLN       | 1.47E-16 | 6.01E-09    | 5.72E-13   | 1.05E-07 | 1           | 1.48E-04 |
| phe.Fasting_rs183597049S7 | DIAPH1 | rs78736524 S5  | KPNA3       | 2.97E-15 | 1.21E-07    | 8.14E-12   | 1.18E-13 | 4.80E-06    | 7.06E-10 |
| phe.Fasting_rs183597049S7 | DIAPH1 | rs78990344 S2  | LOC10050631 | 2.37E-06 | 1           | 1.30E-03   | 6.78E-11 | 0.00276161  | 2.13E-07 |
| phe.Fasting_rs183597049S7 | DIAPH1 | rs79781495 S8  | KPNA3       | 2.97E-15 | 1.21E-07    | 8.14E-12   | 1.09E-13 | 4.44E-06    | 6.79E-10 |
| phe.Fasting_rs183597049S7 | DIAPH1 | rs79886603 S15 | NA          | 8.71E-08 | 1           | 6.74E-05   | 4.66E-07 | 1           | 5.59E-04 |
| phe.Fasting_rs183597049S7 | DIAPH1 | rs80200953 S8  | PPP2R5D     | 8.49E-17 | 3.47E-09    | 3.69E-13   | 3.65E-09 | 0.148399    | 7.55E-06 |
| phe.Fasting_rs183597049S7 | DIAPH1 | rs80332465 S5  | KPNA3       | 3.13E-15 | 1.28E-07    | 8.51E-12   | 1.17E-13 | 4.77E-06    | 7.06E-10 |
| phe.Fasting_rs183597049S7 | DIAPH1 | rs80334773 S5  | KPNA3       | 3.13E-15 | 1.28E-07    | 8.51E-12   | 1.17E-13 | 4.77E-06    | 7.06E-10 |
| phe.Fasting_rs183980988S2 | NA     | rs111576333S5  | TMEM64      | 2.37E-06 | 1           | 1.30E-03   | 5.87E-14 | 2.39E-06    | 3.99E-10 |
| phe.Fasting_rs183980988S2 | NA     | rs112089881S8  | ZFAND4      | 2.04E-17 | 8.32E-10    | 1.43E-13   | 1.09E-09 | 0.0445256   | 2.58E-06 |
| phe.Fasting_rs183980988S2 | NA     | rs112091318S5  | TMEM64      | 7.32E-07 | 1           | 4.60E-04   | 3.91E-08 | 1           | 6.13E-05 |
| phe.Fasting_rs183980988S2 | NA     | rs114334325S7  | AP3M2       | 4.51E-15 | 1.84E-07    | 1.18E-11   | 3.87E-07 | 1           | 4.75E-04 |
| phe.Fasting_rs183980988S2 | NA     | rs114394395S7  | AP3M2       | 4.81E-15 | 1.97E-07    | 1.25E-11   | 3.87E-07 | 1           | 4.75E-04 |
| phe.Fasting_rs183980988S2 | NA     | rs114565620S8  | RCL1        | 1.82E-16 | 7.42E-09    | 6.37E-13   | 3.70E-08 | 1           | 5.84E-05 |
| phe.Fasting_rs183980988S2 | NA     | rs115083290S19 | NA          | 4.38E-16 | 1.79E-08    | 1.40E-12   | 1.42E-08 | 0.576679    | 2.53E-05 |
| phe.Fasting_rs183980988S2 | NA     | rs11524145 S5  | CDK6        | 7.80E-07 | 1           | 4.86E-04   | 7.89E-06 | 1           | 6.69E-03 |
| phe.Fasting_rs183980988S2 | NA     | rs115752779S19 | NA          | 4.38E-16 | 1.79E-08    | 1.40E-12   | 1.42E-08 | 0.576679    | 2.53E-05 |
| phe.Fasting_rs183980988S2 | NA     | rs115787552S5  | KPNA3       | 2.97E-15 | 1.21E-07    | 8.14E-12   | 1.18E-13 | 4.80E-06    | 7.06E-10 |
| phe.Fasting_rs183980988S2 | NA     | rs115888477S8  | NA          | 2.03E-14 | 8.28E-07    | 5.02E-11   | 2.21E-14 | 8.99E-07    | 1.73E-10 |
| phe.Fasting_rs183980988S2 | NA     | rs116011837S9  | BRD2        | 4.89E-11 | 0.00199774  | 6.62E-08   | 4.07E-14 | 1.66E-06    | 2.85E-10 |
| phe.Fasting_rs183980988S2 | NA     | rs116079984S8  | KPNA3       | 2.97E-15 | 1.21E-07    | 8.14E-12   | 1.24E-13 | 5.04E-06    | 7.34E-10 |
| phe.Fasting_rs183980988S2 | NA     | rs116120727S9  | BRD2        | 4.89E-11 | 0.00199774  | 6.62E-08   | 4.07E-14 | 1.66E-06    | 2.85E-10 |
| phe.Fasting_rs183980988S2 | NA     | rs116406581S2  | NA          | 1.81E-14 | 7.39E-07    | 4.52E-11   | 2.35E-07 | 1           | 3.05E-04 |
| phe.Fasting_rs183980988S2 | NA     | rs116548615S8  | TMEM45B     | 1.73E-16 | 7.06E-09    | 6.15E-13   | 8.70E-12 | 0.000354153 | 3.26E-08 |
| phe.Fasting_rs183980988S2 | NA     | rs116696844S3  | AP3M2       | 6.92E-15 | 2.83E-07    | 1.78E-11   | 3.87E-07 | 1           | 4.75E-04 |
| phe.Fasting_rs183980988S2 | NA     | rs11989304 S4  | TMEM64      | 2.37E-06 | 1           | 0.00129547 | 6.78E-11 | 0.00276161  | 2.13E-07 |
| phe.Fasting_rs183980988S2 | NA     | rs140524622S7  | MRPL10      | 1.08E-16 | 4.41E-09    | 4.54E-13   | 7.35E-06 | 1           | 6.31E-03 |
| phe.Fasting_rs183980988S2 | NA     | rs146815317S5  | KPNA3       | 2.97E-15 | 1.21E-07    | 8.14E-12   | 1.18E-13 | 4.80E-06    | 7.06E-10 |
| phe.Fasting_rs183980988S2 | NA     | rs150117838S8  | KPNA3       | 2.97E-15 | 1.21E-07    | 8.14E-12   | 1.09E-13 | 4.44E-06    | 6.79E-10 |
| phe.Fasting_rs183980988S2 | NA     | rs150916187S4  | HIST1H2BK   | 1.38E-05 | 1           | 0.00605332 | 1.37E-14 | 5.59E-07    | 1.16E-10 |
| phe.Fasting_rs183980988S2 | NA     | rs16894241 S4  | HIST1H2BK   | 1.99E-11 | 0.000812315 | 2.96E-08   | 3.44E-14 | 1.40E-06    | 2.50E-10 |
| phe.Fasting_rs183980988S2 | NA     | rs2032062 S8   | NA          | 1.22E-14 | 4.98E-07    | 3.09E-11   | 8.48E-06 | 1           | 7.14E-03 |

|                            |        |             |     |             |          |             |             |          |             |          |
|----------------------------|--------|-------------|-----|-------------|----------|-------------|-------------|----------|-------------|----------|
| phe.Fasting_rs183980988 S2 | NA     | rs2153597   | S8  | ZNF438      | 5.51E-11 | 0.00224928  | 7.42E-08    | 4.52E-09 | 0.183916    | 9.08E-06 |
| phe.Fasting_rs183980988 S2 | NA     | rs2835656   | S7  | TTC3        | 3.01E-10 | 0.0122766   | 3.60E-07    | 9.12E-06 | 1           | 7.57E-03 |
| phe.Fasting_rs183980988 S2 | NA     | rs34801978  | S3  | HOXB2       | 1.23E-05 | 1           | 0.00545724  | 1.03E-08 | 0.419057    | 1.90E-05 |
| phe.Fasting_rs183980988 S2 | NA     | rs352346    | S3  | GRPEL2      | 1.85E-11 | 0.000754995 | 2.78E-08    | 8.42E-06 | 1           | 7.10E-03 |
| phe.Fasting_rs183980988 S2 | NA     | rs3750898   | S8  | DCLRE1A     | 2.29E-05 | 1           | 0.0093502   | 8.76E-06 | 1           | 7.32E-03 |
| phe.Fasting_rs183980988 S2 | NA     | rs4732511   | S13 | POR         | 2.30E-15 | 9.39E-08    | 6.48E-12    | 9.65E-06 | 1           | 7.93E-03 |
| phe.Fasting_rs183980988 S2 | NA     | rs57503635  | S3  | NA          | 6.34E-16 | 2.59E-08    | 1.95E-12    | 3.17E-14 | 1.29E-06    | 2.34E-10 |
| phe.Fasting_rs183980988 S2 | NA     | rs58905476  | S7  | TTC3        | 3.29E-10 | 0.0134302   | 3.90E-07    | 9.79E-06 | 1           | 8.01E-03 |
| phe.Fasting_rs183980988 S2 | NA     | rs60011869  | S16 | NA          | 1.04E-05 | 1           | 0.00472365  | 8.16E-10 | 0.0332257   | 1.98E-06 |
| phe.Fasting_rs183980988 S2 | NA     | rs6964407   | S7  | POR         | 7.55E-15 | 3.08E-07    | 1.94E-11    | 8.91E-06 | 1           | 7.43E-03 |
| phe.Fasting_rs183980988 S2 | NA     | rs7004597   | S8  | NA          | 4.51E-15 | 1.84E-07    | 1.18E-11    | 2.34E-07 | 1           | 3.04E-04 |
| phe.Fasting_rs183980988 S2 | NA     | rs7256517   | S7  | CYTH2       | 1.04E-15 | 4.24E-08    | 3.06E-12    | 4.82E-12 | 0.000196022 | 1.91E-08 |
| phe.Fasting_rs183980988 S2 | NA     | rs73283603  | S7  | ZWINT       | 1.90E-06 | 1           | 1.07E-03    | 2.03E-07 | 1           | 2.68E-04 |
| phe.Fasting_rs183980988 S2 | NA     | rs73392640  | S8  | POLR3B      | 2.02E-10 | 8.26E-03    | 2.49E-07    | 5.19E-11 | 0.00211214  | 1.67E-07 |
| phe.Fasting_rs183980988 S2 | NA     | rs734069    | S19 | NA          | 2.06E-08 | 0.839421    | 1.81E-05    | 6.71E-10 | 0.0272994   | 1.68E-06 |
| phe.Fasting_rs183980988 S2 | NA     | rs73619637  | S8  | NA          | 1.44E-15 | 5.89E-08    | 4.14E-12    | 2.05E-10 | 0.00833668  | 5.78E-07 |
| phe.Fasting_rs183980988 S2 | NA     | rs74627895  | S8  | TMEM64      | 7.32E-07 | 1.00E+00    | 4.60E-04    | 2.03E-08 | 0.828094    | 3.48E-05 |
| phe.Fasting_rs183980988 S2 | NA     | rs74914207  | S24 | NA          | 1.37E-10 | 0.00558626  | 1.73E-07    | 9.12E-11 | 0.0037135   | 2.80E-07 |
| phe.Fasting_rs183980988 S2 | NA     | rs75350765  | S5  | RCL1        | 1.82E-16 | 7.42E-09    | 6.37E-13    | 3.70E-08 | 1           | 5.84E-05 |
| phe.Fasting_rs183980988 S2 | NA     | rs75374128  | S5  | CNTLN       | 1.47E-16 | 6.01E-09    | 5.72E-13    | 1.01E-07 | 1           | 1.42E-04 |
| phe.Fasting_rs183980988 S2 | NA     | rs75506779  | S5  | TMCO3       | 5.55E-07 | 1           | 0.000360863 | 1.10E-08 | 0.449707    | 2.03E-05 |
| phe.Fasting_rs183980988 S2 | NA     | rs75758702  | S24 | NA          | 7.02E-17 | 2.87E-09    | 3.16E-13    | 1.57E-10 | 0.00638323  | 4.59E-07 |
| phe.Fasting_rs183980988 S2 | NA     | rs75864203  | S8  | CNTLN       | 1.47E-16 | 6.01E-09    | 5.72E-13    | 1.01E-07 | 1           | 1.42E-04 |
| phe.Fasting_rs183980988 S2 | NA     | rs75949566  | S5  | TMEM64      | 2.76E-06 | 1           | 0.001473    | 8.48E-11 | 0.00345267  | 2.62E-07 |
| phe.Fasting_rs183980988 S2 | NA     | rs76844308  | S8  | CNTLN       | 7.68E-17 | 3.14E-09    | 3.41E-13    | 9.52E-08 | 1           | 1.35E-04 |
| phe.Fasting_rs183980988 S2 | NA     | rs7763107   | S8  | FARS2       | 5.78E-16 | 2.36E-08    | 1.79E-12    | 9.23E-12 | 0.000375564 | 3.44E-08 |
| phe.Fasting_rs183980988 S2 | NA     | rs77798597  | S7  | KPNA3       | 2.97E-15 | 1.21E-07    | 8.14E-12    | 1.09E-13 | 4.44E-06    | 6.79E-10 |
| phe.Fasting_rs183980988 S2 | NA     | rs77845645  | S21 | NA          | 1.53E-06 | 1           | 0.000888475 | 4.20E-11 | 0.00170882  | 1.38E-07 |
| phe.Fasting_rs183980988 S2 | NA     | rs78353402  | S8  | AP3M2       | 4.51E-15 | 1.84E-07    | 1.18E-11    | 3.87E-07 | 1           | 4.75E-04 |
| phe.Fasting_rs183980988 S2 | NA     | rs78516788  | S8  | SLC38A1     | 2.75E-11 | 0.00112269  | 3.94E-08    | 2.44E-10 | 0.00992686  | 6.74E-07 |
| phe.Fasting_rs183980988 S2 | NA     | rs78697063  | S5  | MSI2        | 8.23E-19 | 3.36E-11    | 2.70E-14    | 6.84E-10 | 0.0278369   | 1.70E-06 |
| phe.Fasting_rs183980988 S2 | NA     | rs78722272  | S5  | CNTLN       | 1.47E-16 | 6.01E-09    | 5.72E-13    | 1.05E-07 | 1           | 1.48E-04 |
| phe.Fasting_rs183980988 S2 | NA     | rs78736524  | S5  | KPNA3       | 2.97E-15 | 1.21E-07    | 8.14E-12    | 1.18E-13 | 4.80E-06    | 7.06E-10 |
| phe.Fasting_rs183980988 S2 | NA     | rs78990344  | S2  | LOC10050631 | 2.37E-06 | 1           | 1.30E-03    | 6.78E-11 | 0.00276161  | 2.13E-07 |
| phe.Fasting_rs183980988 S2 | NA     | rs79781495  | S8  | KPNA3       | 2.97E-15 | 1.21E-07    | 8.14E-12    | 1.09E-13 | 4.44E-06    | 6.79E-10 |
| phe.Fasting_rs183980988 S2 | NA     | rs79886603  | S15 | NA          | 8.71E-08 | 1           | 6.74E-05    | 4.66E-07 | 1           | 5.59E-04 |
| phe.Fasting_rs183980988 S2 | NA     | rs80200953  | S8  | PPP2R5D     | 8.49E-17 | 3.47E-09    | 3.69E-13    | 3.65E-09 | 0.148399    | 7.55E-06 |
| phe.Fasting_rs183980988 S2 | NA     | rs80332465  | S5  | KPNA3       | 3.13E-15 | 1.28E-07    | 8.51E-12    | 1.17E-13 | 4.77E-06    | 7.06E-10 |
| phe.Fasting_rs183980988 S2 | NA     | rs80334773  | S5  | KPNA3       | 3.13E-15 | 1.28E-07    | 8.51E-12    | 1.17E-13 | 4.77E-06    | 7.06E-10 |
| phe.Fasting_rs184233232 S7 | DIAPH1 | rs111576333 | S5  | TMEM64      | 2.37E-06 | 1           | 0.00129547  | 5.87E-14 | 2.39E-06    | 3.99E-10 |

|                           |        |                |           |          |             |             |          |             |          |
|---------------------------|--------|----------------|-----------|----------|-------------|-------------|----------|-------------|----------|
| phe.Fasting_rs184233232S7 | DIAPH1 | rs112089881S8  | ZFAND4    | 2.04E-17 | 8.32E-10    | 1.43E-13    | 1.09E-09 | 0.0445256   | 2.58E-06 |
| phe.Fasting_rs184233232S7 | DIAPH1 | rs112091318S5  | TMEM64    | 7.32E-07 | 1           | 0.000459899 | 3.91E-08 | 1           | 6.13E-05 |
| phe.Fasting_rs184233232S7 | DIAPH1 | rs114334325S7  | AP3M2     | 4.51E-15 | 1.84E-07    | 1.18E-11    | 3.87E-07 | 1           | 4.75E-04 |
| phe.Fasting_rs184233232S7 | DIAPH1 | rs114394395S7  | AP3M2     | 4.81E-15 | 1.97E-07    | 1.25E-11    | 3.87E-07 | 1           | 4.75E-04 |
| phe.Fasting_rs184233232S7 | DIAPH1 | rs114565620S8  | RCL1      | 1.82E-16 | 7.42E-09    | 6.37E-13    | 3.70E-08 | 1           | 5.84E-05 |
| phe.Fasting_rs184233232S7 | DIAPH1 | rs115083290S19 | NA        | 4.38E-16 | 1.79E-08    | 1.40E-12    | 1.42E-08 | 0.576679    | 2.53E-05 |
| phe.Fasting_rs184233232S7 | DIAPH1 | rs11524145S5   | CDK6      | 7.80E-07 | 1.00E+00    | 4.86E-04    | 7.89E-06 | 1           | 6.69E-03 |
| phe.Fasting_rs184233232S7 | DIAPH1 | rs115752779S19 | NA        | 4.38E-16 | 1.79E-08    | 1.40E-12    | 1.42E-08 | 0.576679    | 2.53E-05 |
| phe.Fasting_rs184233232S7 | DIAPH1 | rs115787552S5  | KPNA3     | 2.97E-15 | 1.21E-07    | 8.14E-12    | 1.18E-13 | 4.80E-06    | 7.06E-10 |
| phe.Fasting_rs184233232S7 | DIAPH1 | rs115888477S8  | NA        | 2.03E-14 | 8.28E-07    | 5.02E-11    | 2.21E-14 | 8.99E-07    | 1.73E-10 |
| phe.Fasting_rs184233232S7 | DIAPH1 | rs116011837S9  | BRD2      | 4.89E-11 | 2.00E-03    | 6.62E-08    | 4.07E-14 | 1.66E-06    | 2.85E-10 |
| phe.Fasting_rs184233232S7 | DIAPH1 | rs116079984S8  | KPNA3     | 2.97E-15 | 1.21E-07    | 8.14E-12    | 1.24E-13 | 5.04E-06    | 7.34E-10 |
| phe.Fasting_rs184233232S7 | DIAPH1 | rs116120727S9  | BRD2      | 4.89E-11 | 2.00E-03    | 6.62E-08    | 4.07E-14 | 1.66E-06    | 2.85E-10 |
| phe.Fasting_rs184233232S7 | DIAPH1 | rs116406581S2  | NA        | 1.81E-14 | 7.39E-07    | 4.52E-11    | 2.35E-07 | 1           | 3.05E-04 |
| phe.Fasting_rs184233232S7 | DIAPH1 | rs116548615S8  | TMEM45B   | 1.73E-16 | 7.06E-09    | 6.15E-13    | 8.70E-12 | 0.000354153 | 3.26E-08 |
| phe.Fasting_rs184233232S7 | DIAPH1 | rs116696844S3  | AP3M2     | 6.92E-15 | 2.83E-07    | 1.78E-11    | 3.87E-07 | 1           | 4.75E-04 |
| phe.Fasting_rs184233232S7 | DIAPH1 | rs11989304S4   | TMEM64    | 2.37E-06 | 1           | 1.30E-03    | 6.78E-11 | 0.00276161  | 2.13E-07 |
| phe.Fasting_rs184233232S7 | DIAPH1 | rs140524622S7  | MRPL10    | 1.08E-16 | 4.41E-09    | 4.54E-13    | 7.35E-06 | 1           | 6.31E-03 |
| phe.Fasting_rs184233232S7 | DIAPH1 | rs146815317S5  | KPNA3     | 2.97E-15 | 1.21E-07    | 8.14E-12    | 1.18E-13 | 4.80E-06    | 7.06E-10 |
| phe.Fasting_rs184233232S7 | DIAPH1 | rs150117838S8  | KPNA3     | 2.97E-15 | 1.21E-07    | 8.14E-12    | 1.09E-13 | 4.44E-06    | 6.79E-10 |
| phe.Fasting_rs184233232S7 | DIAPH1 | rs150916187S4  | HIST1H2BK | 1.38E-05 | 1           | 6.05E-03    | 1.37E-14 | 5.59E-07    | 1.16E-10 |
| phe.Fasting_rs184233232S7 | DIAPH1 | rs16894241S4   | HIST1H2BK | 1.99E-11 | 8.12E-04    | 2.96E-08    | 3.44E-14 | 1.40E-06    | 2.50E-10 |
| phe.Fasting_rs184233232S7 | DIAPH1 | rs2032062S8    | NA        | 1.22E-14 | 4.98E-07    | 3.09E-11    | 8.48E-06 | 1           | 7.14E-03 |
| phe.Fasting_rs184233232S7 | DIAPH1 | rs2153597S8    | ZNF438    | 5.51E-11 | 0.00224928  | 7.42E-08    | 4.52E-09 | 0.183916    | 9.08E-06 |
| phe.Fasting_rs184233232S7 | DIAPH1 | rs2835656S7    | TTC3      | 3.01E-10 | 0.0122766   | 3.60E-07    | 9.12E-06 | 1           | 7.57E-03 |
| phe.Fasting_rs184233232S7 | DIAPH1 | rs34801978S3   | HOXB2     | 1.23E-05 | 1           | 5.46E-03    | 1.03E-08 | 0.419057    | 1.90E-05 |
| phe.Fasting_rs184233232S7 | DIAPH1 | rs352346S3     | GRPEL2    | 1.85E-11 | 0.000754995 | 2.78E-08    | 8.42E-06 | 1           | 7.10E-03 |
| phe.Fasting_rs184233232S7 | DIAPH1 | rs3750898S8    | DCLRE1A   | 2.29E-05 | 1           | 0.0093502   | 8.76E-06 | 1           | 7.32E-03 |
| phe.Fasting_rs184233232S7 | DIAPH1 | rs4732511S13   | POR       | 2.30E-15 | 9.39E-08    | 6.48E-12    | 9.65E-06 | 1           | 7.93E-03 |
| phe.Fasting_rs184233232S7 | DIAPH1 | rs57503635S3   | NA        | 6.34E-16 | 2.59E-08    | 1.95E-12    | 3.17E-14 | 1.29E-06    | 2.34E-10 |
| phe.Fasting_rs184233232S7 | DIAPH1 | rs58905476S7   | TTC3      | 3.29E-10 | 0.0134302   | 3.90E-07    | 9.79E-06 | 1           | 8.01E-03 |
| phe.Fasting_rs184233232S7 | DIAPH1 | rs60011869S16  | NA        | 1.04E-05 | 1.00E+00    | 4.72E-03    | 8.16E-10 | 0.0332257   | 1.98E-06 |
| phe.Fasting_rs184233232S7 | DIAPH1 | rs6964407S7    | POR       | 7.55E-15 | 3.08E-07    | 1.94E-11    | 8.91E-06 | 1           | 7.43E-03 |
| phe.Fasting_rs184233232S7 | DIAPH1 | rs7004597S8    | NA        | 4.51E-15 | 1.84E-07    | 1.18E-11    | 2.34E-07 | 1           | 3.04E-04 |
| phe.Fasting_rs184233232S7 | DIAPH1 | rs7256517S7    | CYTH2     | 1.04E-15 | 4.24E-08    | 3.06E-12    | 4.82E-12 | 0.000196022 | 1.91E-08 |
| phe.Fasting_rs184233232S7 | DIAPH1 | rs73283603S7   | ZWINT     | 1.90E-06 | 1.00E+00    | 1.07E-03    | 2.03E-07 | 1           | 2.68E-04 |
| phe.Fasting_rs184233232S7 | DIAPH1 | rs73392640S8   | POLR3B    | 2.02E-10 | 8.26E-03    | 2.49E-07    | 5.19E-11 | 0.00211214  | 1.67E-07 |
| phe.Fasting_rs184233232S7 | DIAPH1 | rs734069S19    | NA        | 2.06E-08 | 8.39E-01    | 1.81E-05    | 6.71E-10 | 0.0272994   | 1.68E-06 |
| phe.Fasting_rs184233232S7 | DIAPH1 | rs73619637S8   | NA        | 1.44E-15 | 5.89E-08    | 4.14E-12    | 2.05E-10 | 0.00833668  | 5.78E-07 |
| phe.Fasting_rs184233232S7 | DIAPH1 | rs74627895S8   | TMEM64    | 7.32E-07 | 1           | 0.000459899 | 2.03E-08 | 0.828094    | 3.48E-05 |

|                            |                          |            |     |             |          |            |             |          |             |          |
|----------------------------|--------------------------|------------|-----|-------------|----------|------------|-------------|----------|-------------|----------|
| phe.Fasting_rs184233232S7  | DIAPH1                   | rs74914207 | S24 | NA          | 1.37E-10 | 0.00558626 | 1.73E-07    | 9.12E-11 | 0.0037135   | 2.80E-07 |
| phe.Fasting_rs184233232S7  | DIAPH1                   | rs75350765 | S5  | RCL1        | 1.82E-16 | 7.42E-09   | 6.37E-13    | 3.70E-08 | 1           | 5.84E-05 |
| phe.Fasting_rs184233232S7  | DIAPH1                   | rs75374128 | S5  | CNTLN       | 1.47E-16 | 6.01E-09   | 5.72E-13    | 1.01E-07 | 1           | 1.42E-04 |
| phe.Fasting_rs184233232S7  | DIAPH1                   | rs75506779 | S5  | TMCO3       | 5.55E-07 | 1          | 0.000360863 | 1.10E-08 | 0.449707    | 2.03E-05 |
| phe.Fasting_rs184233232S7  | DIAPH1                   | rs75758702 | S24 | NA          | 7.02E-17 | 2.87E-09   | 3.16E-13    | 1.57E-10 | 0.00638323  | 4.59E-07 |
| phe.Fasting_rs184233232S7  | DIAPH1                   | rs75864203 | S8  | CNTLN       | 1.47E-16 | 6.01E-09   | 5.72E-13    | 1.01E-07 | 1           | 1.42E-04 |
| phe.Fasting_rs184233232S7  | DIAPH1                   | rs75949566 | S5  | TMEM64      | 2.76E-06 | 1          | 0.001473    | 8.48E-11 | 0.00345267  | 2.62E-07 |
| phe.Fasting_rs184233232S7  | DIAPH1                   | rs76844308 | S8  | CNTLN       | 7.68E-17 | 3.14E-09   | 3.41E-13    | 9.52E-08 | 1           | 1.35E-04 |
| phe.Fasting_rs184233232S7  | DIAPH1                   | rs7763107  | S8  | FARS2       | 5.78E-16 | 2.36E-08   | 1.79E-12    | 9.23E-12 | 0.000375564 | 3.44E-08 |
| phe.Fasting_rs184233232S7  | DIAPH1                   | rs77798597 | S7  | KPNA3       | 2.97E-15 | 1.21E-07   | 8.14E-12    | 1.09E-13 | 4.44E-06    | 6.79E-10 |
| phe.Fasting_rs184233232S7  | DIAPH1                   | rs77845645 | S21 | NA          | 1.53E-06 | 1          | 0.000888475 | 4.20E-11 | 0.00170882  | 1.38E-07 |
| phe.Fasting_rs184233232S7  | DIAPH1                   | rs78353402 | S8  | AP3M2       | 4.51E-15 | 1.84E-07   | 1.18E-11    | 3.87E-07 | 1           | 4.75E-04 |
| phe.Fasting_rs184233232S7  | DIAPH1                   | rs78516788 | S8  | SLC38A1     | 2.75E-11 | 0.00112269 | 3.94E-08    | 2.44E-10 | 0.00992686  | 6.74E-07 |
| phe.Fasting_rs184233232S7  | DIAPH1                   | rs78697063 | S5  | MSI2        | 8.23E-19 | 3.36E-11   | 2.70E-14    | 6.84E-10 | 0.0278369   | 1.70E-06 |
| phe.Fasting_rs184233232S7  | DIAPH1                   | rs78722272 | S5  | CNTLN       | 1.47E-16 | 6.01E-09   | 5.72E-13    | 1.05E-07 | 1           | 1.48E-04 |
| phe.Fasting_rs184233232S7  | DIAPH1                   | rs78736524 | S5  | KPNA3       | 2.97E-15 | 1.21E-07   | 8.14E-12    | 1.18E-13 | 4.80E-06    | 7.06E-10 |
| phe.Fasting_rs184233232S7  | DIAPH1                   | rs78990344 | S2  | LOC10050631 | 2.37E-06 | 1          | 0.00129547  | 6.78E-11 | 0.00276161  | 2.13E-07 |
| phe.Fasting_rs184233232S7  | DIAPH1                   | rs79781495 | S8  | KPNA3       | 2.97E-15 | 1.21E-07   | 8.14E-12    | 1.09E-13 | 4.44E-06    | 6.79E-10 |
| phe.Fasting_rs184233232S7  | DIAPH1                   | rs79886603 | S15 | NA          | 8.71E-08 | 1.00E+00   | 6.74E-05    | 4.66E-07 | 1           | 5.59E-04 |
| phe.Fasting_rs184233232S7  | DIAPH1                   | rs80200953 | S8  | PPP2R5D     | 8.49E-17 | 3.47E-09   | 3.69E-13    | 3.65E-09 | 0.148399    | 7.55E-06 |
| phe.Fasting_rs184233232S7  | DIAPH1                   | rs80332465 | S5  | KPNA3       | 3.13E-15 | 1.28E-07   | 8.51E-12    | 1.17E-13 | 4.77E-06    | 7.06E-10 |
| phe.Fasting_rs184233232S7  | DIAPH1                   | rs80334773 | S5  | KPNA3       | 3.13E-15 | 1.28E-07   | 8.51E-12    | 1.17E-13 | 4.77E-06    | 7.06E-10 |
| phe.Fasting_rs184509477S13 | "PCDHGB4,Prs111576333S5  |            |     | TMEM64      | 2.37E-06 | 1.00E+00   | 1.30E-03    | 5.87E-14 | 2.39E-06    | 3.99E-10 |
| phe.Fasting_rs184509477S13 | "PCDHGB4,Prs112089881S8  |            |     | ZFAND4      | 2.04E-17 | 8.32E-10   | 1.43E-13    | 1.09E-09 | 0.0445256   | 2.58E-06 |
| phe.Fasting_rs184509477S13 | "PCDHGB4,Prs112091318S5  |            |     | TMEM64      | 7.32E-07 | 1.00E+00   | 4.60E-04    | 3.91E-08 | 1           | 6.13E-05 |
| phe.Fasting_rs184509477S13 | "PCDHGB4,Prs114334325S7  |            |     | AP3M2       | 4.51E-15 | 1.84E-07   | 1.18E-11    | 3.87E-07 | 1           | 4.75E-04 |
| phe.Fasting_rs184509477S13 | "PCDHGB4,Prs114394395S7  |            |     | AP3M2       | 4.81E-15 | 1.97E-07   | 1.25E-11    | 3.87E-07 | 1           | 4.75E-04 |
| phe.Fasting_rs184509477S13 | "PCDHGB4,Prs114565620S8  |            |     | RCL1        | 1.82E-16 | 7.42E-09   | 6.37E-13    | 3.70E-08 | 1           | 5.84E-05 |
| phe.Fasting_rs184509477S13 | "PCDHGB4,Prs115083290S19 |            |     | NA          | 4.38E-16 | 1.79E-08   | 1.40E-12    | 1.42E-08 | 0.576679    | 2.53E-05 |
| phe.Fasting_rs184509477S13 | "PCDHGB4,Prs11524145 S5  |            |     | CDK6        | 7.80E-07 | 1.00E+00   | 4.86E-04    | 7.89E-06 | 1           | 6.69E-03 |
| phe.Fasting_rs184509477S13 | "PCDHGB4,Prs115752779S19 |            |     | NA          | 4.38E-16 | 1.79E-08   | 1.40E-12    | 1.42E-08 | 0.576679    | 2.53E-05 |
| phe.Fasting_rs184509477S13 | "PCDHGB4,Prs115787552S5  |            |     | KPNA3       | 2.97E-15 | 1.21E-07   | 8.14E-12    | 1.18E-13 | 4.80E-06    | 7.06E-10 |
| phe.Fasting_rs184509477S13 | "PCDHGB4,Prs115888477S8  |            |     | NA          | 2.03E-14 | 8.28E-07   | 5.02E-11    | 2.21E-14 | 8.99E-07    | 1.73E-10 |
| phe.Fasting_rs184509477S13 | "PCDHGB4,Prs116011837S9  |            |     | BRD2        | 4.89E-11 | 2.00E-03   | 6.62E-08    | 4.07E-14 | 1.66E-06    | 2.85E-10 |
| phe.Fasting_rs184509477S13 | "PCDHGB4,Prs116079984S8  |            |     | KPNA3       | 2.97E-15 | 1.21E-07   | 8.14E-12    | 1.24E-13 | 5.04E-06    | 7.34E-10 |
| phe.Fasting_rs184509477S13 | "PCDHGB4,Prs116120727S9  |            |     | BRD2        | 4.89E-11 | 2.00E-03   | 6.62E-08    | 4.07E-14 | 1.66E-06    | 2.85E-10 |
| phe.Fasting_rs184509477S13 | "PCDHGB4,Prs116406581S2  |            |     | NA          | 1.81E-14 | 7.39E-07   | 4.52E-11    | 2.35E-07 | 1           | 3.05E-04 |
| phe.Fasting_rs184509477S13 | "PCDHGB4,Prs116548615S8  |            |     | TMEM45B     | 1.73E-16 | 7.06E-09   | 6.15E-13    | 8.70E-12 | 0.000354153 | 3.26E-08 |
| phe.Fasting_rs184509477S13 | "PCDHGB4,Prs116696844S3  |            |     | AP3M2       | 6.92E-15 | 2.83E-07   | 1.78E-11    | 3.87E-07 | 1           | 4.75E-04 |
| phe.Fasting_rs184509477S13 | "PCDHGB4,Prs11989304 S4  |            |     | TMEM64      | 2.37E-06 | 1.00E+00   | 1.30E-03    | 6.78E-11 | 0.00276161  | 2.13E-07 |

|                             |                           |            |          |             |             |          |             |          |
|-----------------------------|---------------------------|------------|----------|-------------|-------------|----------|-------------|----------|
| phe.Fasting_rs184509477 S13 | "PCDHGB4,Pirs140524622 S7 | MRPL10     | 1.08E-16 | 4.41E-09    | 4.54E-13    | 7.35E-06 | 1           | 6.31E-03 |
| phe.Fasting_rs184509477 S13 | "PCDHGB4,Pirs146815317 S5 | KPNA3      | 2.97E-15 | 1.21E-07    | 8.14E-12    | 1.18E-13 | 4.80E-06    | 7.06E-10 |
| phe.Fasting_rs184509477 S13 | "PCDHGB4,Pirs150117838 S8 | KPNA3      | 2.97E-15 | 1.21E-07    | 8.14E-12    | 1.09E-13 | 4.44E-06    | 6.79E-10 |
| phe.Fasting_rs184509477 S13 | "PCDHGB4,Pirs150916187 S4 | HIST1H2BK  | 1.38E-05 | 1.00E+00    | 6.05E-03    | 1.37E-14 | 5.59E-07    | 1.16E-10 |
| phe.Fasting_rs184509477 S13 | "PCDHGB4,Pirs16894241 S4  | HIST1H2BK  | 1.99E-11 | 0.000812315 | 2.96E-08    | 3.44E-14 | 1.40E-06    | 2.50E-10 |
| phe.Fasting_rs184509477 S13 | "PCDHGB4,Pirs2032062 S8   | NA         | 1.22E-14 | 4.98E-07    | 3.09E-11    | 8.48E-06 | 1           | 7.14E-03 |
| phe.Fasting_rs184509477 S13 | "PCDHGB4,Pirs2153597 S8   | ZNF438     | 5.51E-11 | 0.00224928  | 7.42E-08    | 4.52E-09 | 0.183916    | 9.08E-06 |
| phe.Fasting_rs184509477 S13 | "PCDHGB4,Pirs2835656 S7   | TTC3       | 3.01E-10 | 1.23E-02    | 3.60E-07    | 9.12E-06 | 1           | 7.57E-03 |
| phe.Fasting_rs184509477 S13 | "PCDHGB4,Pirs34801978 S3  | HOXB2      | 1.23E-05 | 1.00E+00    | 5.46E-03    | 1.03E-08 | 0.419057    | 1.90E-05 |
| phe.Fasting_rs184509477 S13 | "PCDHGB4,Pirs352346 S3    | GRPEL2     | 1.85E-11 | 7.55E-04    | 2.78E-08    | 8.42E-06 | 1           | 7.10E-03 |
| phe.Fasting_rs184509477 S13 | "PCDHGB4,Pirs3750898 S8   | DCLRE1A    | 2.29E-05 | 1           | 0.0093502   | 8.76E-06 | 1           | 7.32E-03 |
| phe.Fasting_rs184509477 S13 | "PCDHGB4,Pirs4732511 S13  | POR        | 2.30E-15 | 9.39E-08    | 6.48E-12    | 9.65E-06 | 1           | 7.93E-03 |
| phe.Fasting_rs184509477 S13 | "PCDHGB4,Pirs57503635 S3  | NA         | 6.34E-16 | 2.59E-08    | 1.95E-12    | 3.17E-14 | 1.29E-06    | 2.34E-10 |
| phe.Fasting_rs184509477 S13 | "PCDHGB4,Pirs58905476 S7  | TTC3       | 3.29E-10 | 1.34E-02    | 3.90E-07    | 9.79E-06 | 1           | 8.01E-03 |
| phe.Fasting_rs184509477 S13 | "PCDHGB4,Pirs60011869 S16 | NA         | 1.04E-05 | 1.00E+00    | 4.72E-03    | 8.16E-10 | 0.0332257   | 1.98E-06 |
| phe.Fasting_rs184509477 S13 | "PCDHGB4,Pirs6964407 S7   | POR        | 7.55E-15 | 3.08E-07    | 1.94E-11    | 8.91E-06 | 1           | 7.43E-03 |
| phe.Fasting_rs184509477 S13 | "PCDHGB4,Pirs7004597 S8   | NA         | 4.51E-15 | 1.84E-07    | 1.18E-11    | 2.34E-07 | 1           | 3.04E-04 |
| phe.Fasting_rs184509477 S13 | "PCDHGB4,Pirs7256517 S7   | CYTH2      | 1.04E-15 | 4.24E-08    | 3.06E-12    | 4.82E-12 | 0.000196022 | 1.91E-08 |
| phe.Fasting_rs184509477 S13 | "PCDHGB4,Pirs73283603 S7  | ZWINT      | 1.90E-06 | 1.00E+00    | 1.07E-03    | 2.03E-07 | 1           | 2.68E-04 |
| phe.Fasting_rs184509477 S13 | "PCDHGB4,Pirs73392640 S8  | POLR3B     | 2.02E-10 | 8.26E-03    | 2.49E-07    | 5.19E-11 | 0.00211214  | 1.67E-07 |
| phe.Fasting_rs184509477 S13 | "PCDHGB4,Pirs734069 S19   | NA         | 2.06E-08 | 8.39E-01    | 1.81E-05    | 6.71E-10 | 0.0272994   | 1.68E-06 |
| phe.Fasting_rs184509477 S13 | "PCDHGB4,Pirs73619637 S8  | NA         | 1.44E-15 | 5.89E-08    | 4.14E-12    | 2.05E-10 | 0.00833668  | 5.78E-07 |
| phe.Fasting_rs184509477 S13 | "PCDHGB4,Pirs74627895 S8  | TMEM64     | 7.32E-07 | 1.00E+00    | 4.60E-04    | 2.03E-08 | 0.828094    | 3.48E-05 |
| phe.Fasting_rs184509477 S13 | "PCDHGB4,Pirs74914207 S24 | NA         | 1.37E-10 | 0.00558626  | 1.73E-07    | 9.12E-11 | 0.0037135   | 2.80E-07 |
| phe.Fasting_rs184509477 S13 | "PCDHGB4,Pirs75350765 S5  | RCL1       | 1.82E-16 | 7.42E-09    | 6.37E-13    | 3.70E-08 | 1           | 5.84E-05 |
| phe.Fasting_rs184509477 S13 | "PCDHGB4,Pirs75374128 S5  | CNTLN      | 1.47E-16 | 6.01E-09    | 5.72E-13    | 1.01E-07 | 1           | 1.42E-04 |
| phe.Fasting_rs184509477 S13 | "PCDHGB4,Pirs75506779 S5  | TMCO3      | 5.55E-07 | 1           | 0.000360863 | 1.10E-08 | 0.449707    | 2.03E-05 |
| phe.Fasting_rs184509477 S13 | "PCDHGB4,Pirs75758702 S24 | NA         | 7.02E-17 | 2.87E-09    | 3.16E-13    | 1.57E-10 | 0.00638323  | 4.59E-07 |
| phe.Fasting_rs184509477 S13 | "PCDHGB4,Pirs75864203 S8  | CNTLN      | 1.47E-16 | 6.01E-09    | 5.72E-13    | 1.01E-07 | 1           | 1.42E-04 |
| phe.Fasting_rs184509477 S13 | "PCDHGB4,Pirs75949566 S5  | TMEM64     | 2.76E-06 | 1.00E+00    | 1.47E-03    | 8.48E-11 | 0.00345267  | 2.62E-07 |
| phe.Fasting_rs184509477 S13 | "PCDHGB4,Pirs76844308 S8  | CNTLN      | 7.68E-17 | 3.14E-09    | 3.41E-13    | 9.52E-08 | 1           | 1.35E-04 |
| phe.Fasting_rs184509477 S13 | "PCDHGB4,Pirs7763107 S8   | FARS2      | 5.78E-16 | 2.36E-08    | 1.79E-12    | 9.23E-12 | 0.000375564 | 3.44E-08 |
| phe.Fasting_rs184509477 S13 | "PCDHGB4,Pirs77798597 S7  | KPNA3      | 2.97E-15 | 1.21E-07    | 8.14E-12    | 1.09E-13 | 4.44E-06    | 6.79E-10 |
| phe.Fasting_rs184509477 S13 | "PCDHGB4,Pirs77845645 S21 | NA         | 1.53E-06 | 1.00E+00    | 8.88E-04    | 4.20E-11 | 0.00170882  | 1.38E-07 |
| phe.Fasting_rs184509477 S13 | "PCDHGB4,Pirs78353402 S8  | AP3M2      | 4.51E-15 | 1.84E-07    | 1.18E-11    | 3.87E-07 | 1           | 4.75E-04 |
| phe.Fasting_rs184509477 S13 | "PCDHGB4,Pirs78516788 S8  | SLC38A1    | 2.75E-11 | 1.12E-03    | 3.94E-08    | 2.44E-10 | 0.00992686  | 6.74E-07 |
| phe.Fasting_rs184509477 S13 | "PCDHGB4,Pirs78697063 S5  | MSI2       | 8.23E-19 | 3.36E-11    | 2.70E-14    | 6.84E-10 | 0.0278369   | 1.70E-06 |
| phe.Fasting_rs184509477 S13 | "PCDHGB4,Pirs78722272 S5  | CNTLN      | 1.47E-16 | 6.01E-09    | 5.72E-13    | 1.05E-07 | 1           | 1.48E-04 |
| phe.Fasting_rs184509477 S13 | "PCDHGB4,Pirs78736524 S5  | KPNA3      | 2.97E-15 | 1.21E-07    | 8.14E-12    | 1.18E-13 | 4.80E-06    | 7.06E-10 |
| phe.Fasting_rs184509477 S13 | "PCDHGB4,Pirs78990344 S2  | LOC1005063 | 2.37E-06 | 1.00E+00    | 1.30E-03    | 6.78E-11 | 0.00276161  | 2.13E-07 |

|                             |                             |           |          |          |          |          |             |          |
|-----------------------------|-----------------------------|-----------|----------|----------|----------|----------|-------------|----------|
| phe.Fasting_rs184509477 S13 | "PCDHGB4,Prs79781495 S8     | KPNA3     | 2.97E-15 | 1.21E-07 | 8.14E-12 | 1.09E-13 | 4.44E-06    | 6.79E-10 |
| phe.Fasting_rs184509477 S13 | "PCDHGB4,Prs79886603 S15    | NA        | 8.71E-08 | 1.00E+00 | 6.74E-05 | 4.66E-07 | 1           | 5.59E-04 |
| phe.Fasting_rs184509477 S13 | "PCDHGB4,Prs80200953 S8     | PPP2R5D   | 8.49E-17 | 3.47E-09 | 3.69E-13 | 3.65E-09 | 0.148399    | 7.55E-06 |
| phe.Fasting_rs184509477 S13 | "PCDHGB4,Prs80332465 S5     | KPNA3     | 3.13E-15 | 1.28E-07 | 8.51E-12 | 1.17E-13 | 4.77E-06    | 7.06E-10 |
| phe.Fasting_rs184509477 S13 | "PCDHGB4,Prs80334773 S5     | KPNA3     | 3.13E-15 | 1.28E-07 | 8.51E-12 | 1.17E-13 | 4.77E-06    | 7.06E-10 |
| phe.Fasting_rs185069296 S15 | "LOC100505(rs111576333) S5  | TMEM64    | 2.37E-06 | 1.00E+00 | 1.30E-03 | 5.87E-14 | 2.39E-06    | 3.99E-10 |
| phe.Fasting_rs185069296 S15 | "LOC100505(rs112089881) S8  | ZFAND4    | 2.04E-17 | 8.32E-10 | 1.43E-13 | 1.09E-09 | 0.0445256   | 2.58E-06 |
| phe.Fasting_rs185069296 S15 | "LOC100505(rs112091318) S5  | TMEM64    | 7.32E-07 | 1.00E+00 | 4.60E-04 | 3.91E-08 | 1           | 6.13E-05 |
| phe.Fasting_rs185069296 S15 | "LOC100505(rs114334325) S7  | AP3M2     | 4.51E-15 | 1.84E-07 | 1.18E-11 | 3.87E-07 | 1           | 4.75E-04 |
| phe.Fasting_rs185069296 S15 | "LOC100505(rs114394395) S7  | AP3M2     | 4.81E-15 | 1.97E-07 | 1.25E-11 | 3.87E-07 | 1           | 4.75E-04 |
| phe.Fasting_rs185069296 S15 | "LOC100505(rs114565620) S8  | RCL1      | 1.82E-16 | 7.42E-09 | 6.37E-13 | 3.70E-08 | 1           | 5.84E-05 |
| phe.Fasting_rs185069296 S15 | "LOC100505(rs115083290) S19 | NA        | 4.38E-16 | 1.79E-08 | 1.40E-12 | 1.42E-08 | 0.576679    | 2.53E-05 |
| phe.Fasting_rs185069296 S15 | "LOC100505(rs11524145) S5   | CDK6      | 7.80E-07 | 1.00E+00 | 4.86E-04 | 7.89E-06 | 1           | 6.69E-03 |
| phe.Fasting_rs185069296 S15 | "LOC100505(rs115752779) S19 | NA        | 4.38E-16 | 1.79E-08 | 1.40E-12 | 1.42E-08 | 0.576679    | 2.53E-05 |
| phe.Fasting_rs185069296 S15 | "LOC100505(rs115787552) S5  | KPNA3     | 2.97E-15 | 1.21E-07 | 8.14E-12 | 1.18E-13 | 4.80E-06    | 7.06E-10 |
| phe.Fasting_rs185069296 S15 | "LOC100505(rs115888477) S8  | NA        | 2.03E-14 | 8.28E-07 | 5.02E-11 | 2.21E-14 | 8.99E-07    | 1.73E-10 |
| phe.Fasting_rs185069296 S15 | "LOC100505(rs116011837) S9  | BRD2      | 4.89E-11 | 2.00E-03 | 6.62E-08 | 4.07E-14 | 1.66E-06    | 2.85E-10 |
| phe.Fasting_rs185069296 S15 | "LOC100505(rs116079984) S8  | KPNA3     | 2.97E-15 | 1.21E-07 | 8.14E-12 | 1.24E-13 | 5.04E-06    | 7.34E-10 |
| phe.Fasting_rs185069296 S15 | "LOC100505(rs116120727) S9  | BRD2      | 4.89E-11 | 2.00E-03 | 6.62E-08 | 4.07E-14 | 1.66E-06    | 2.85E-10 |
| phe.Fasting_rs185069296 S15 | "LOC100505(rs116406581) S2  | NA        | 1.81E-14 | 7.39E-07 | 4.52E-11 | 2.35E-07 | 1           | 3.05E-04 |
| phe.Fasting_rs185069296 S15 | "LOC100505(rs116548615) S8  | TMEM45B   | 1.73E-16 | 7.06E-09 | 6.15E-13 | 8.70E-12 | 0.000354153 | 3.26E-08 |
| phe.Fasting_rs185069296 S15 | "LOC100505(rs116696844) S3  | AP3M2     | 6.92E-15 | 2.83E-07 | 1.78E-11 | 3.87E-07 | 1           | 4.75E-04 |
| phe.Fasting_rs185069296 S15 | "LOC100505(rs11989304) S4   | TMEM64    | 2.37E-06 | 1.00E+00 | 1.30E-03 | 6.78E-11 | 0.00276161  | 2.13E-07 |
| phe.Fasting_rs185069296 S15 | "LOC100505(rs140524622) S7  | MRPL10    | 1.08E-16 | 4.41E-09 | 4.54E-13 | 7.35E-06 | 1           | 6.31E-03 |
| phe.Fasting_rs185069296 S15 | "LOC100505(rs146815317) S5  | KPNA3     | 2.97E-15 | 1.21E-07 | 8.14E-12 | 1.18E-13 | 4.80E-06    | 7.06E-10 |
| phe.Fasting_rs185069296 S15 | "LOC100505(rs150117838) S8  | KPNA3     | 2.97E-15 | 1.21E-07 | 8.14E-12 | 1.09E-13 | 4.44E-06    | 6.79E-10 |
| phe.Fasting_rs185069296 S15 | "LOC100505(rs150916187) S4  | HIST1H2BK | 1.38E-05 | 1.00E+00 | 6.05E-03 | 1.37E-14 | 5.59E-07    | 1.16E-10 |
| phe.Fasting_rs185069296 S15 | "LOC100505(rs16894241) S4   | HIST1H2BK | 1.99E-11 | 8.12E-04 | 2.96E-08 | 3.44E-14 | 1.40E-06    | 2.50E-10 |
| phe.Fasting_rs185069296 S15 | "LOC100505(rs2032062) S8    | NA        | 1.22E-14 | 4.98E-07 | 3.09E-11 | 8.48E-06 | 1           | 7.14E-03 |
| phe.Fasting_rs185069296 S15 | "LOC100505(rs2153597) S8    | ZNF438    | 5.51E-11 | 2.25E-03 | 7.42E-08 | 4.52E-09 | 0.183916    | 9.08E-06 |
| phe.Fasting_rs185069296 S15 | "LOC100505(rs2835656) S7    | TTC3      | 3.01E-10 | 1.23E-02 | 3.60E-07 | 9.12E-06 | 1           | 7.57E-03 |
| phe.Fasting_rs185069296 S15 | "LOC100505(rs34801978) S3   | HOXB2     | 1.23E-05 | 1.00E+00 | 5.46E-03 | 1.03E-08 | 0.419057    | 1.90E-05 |
| phe.Fasting_rs185069296 S15 | "LOC100505(rs352346) S3     | GRPEL2    | 1.85E-11 | 7.55E-04 | 2.78E-08 | 8.42E-06 | 1           | 7.10E-03 |
| phe.Fasting_rs185069296 S15 | "LOC100505(rs3750898) S8    | DCLRE1A   | 2.29E-05 | 1.00E+00 | 9.35E-03 | 8.76E-06 | 1           | 7.32E-03 |
| phe.Fasting_rs185069296 S15 | "LOC100505(rs4732511) S13   | POR       | 2.30E-15 | 9.39E-08 | 6.48E-12 | 9.65E-06 | 1           | 7.93E-03 |
| phe.Fasting_rs185069296 S15 | "LOC100505(rs57503635) S3   | NA        | 6.34E-16 | 2.59E-08 | 1.95E-12 | 3.17E-14 | 1.29E-06    | 2.34E-10 |
| phe.Fasting_rs185069296 S15 | "LOC100505(rs58905476) S7   | TTC3      | 3.29E-10 | 1.34E-02 | 3.90E-07 | 9.79E-06 | 1           | 8.01E-03 |
| phe.Fasting_rs185069296 S15 | "LOC100505(rs60011869) S16  | NA        | 1.04E-05 | 1.00E+00 | 4.72E-03 | 8.16E-10 | 0.0332257   | 1.98E-06 |
| phe.Fasting_rs185069296 S15 | "LOC100505(rs6964407) S7    | POR       | 7.55E-15 | 3.08E-07 | 1.94E-11 | 8.91E-06 | 1           | 7.43E-03 |
| phe.Fasting_rs185069296 S15 | "LOC100505(rs7004597) S8    | NA        | 4.51E-15 | 1.84E-07 | 1.18E-11 | 2.34E-07 | 1           | 3.04E-04 |

|              |             |     |                       |             |            |          |          |          |          |             |            |          |
|--------------|-------------|-----|-----------------------|-------------|------------|----------|----------|----------|----------|-------------|------------|----------|
| phe.Fasting_ | rs185069296 | S15 | "LOC100505(rs7256517  | S7          | CYTH2      | 1.04E-15 | 4.24E-08 | 3.06E-12 | 4.82E-12 | 0.000196022 | 1.91E-08   |          |
| phe.Fasting_ | rs185069296 | S15 | "LOC100505(rs73283603 | S7          | ZWINT      | 1.90E-06 | 1.00E+00 | 1.07E-03 | 2.03E-07 | 1           | 2.68E-04   |          |
| phe.Fasting_ | rs185069296 | S15 | "LOC100505(rs73392640 | S8          | POLR3B     | 2.02E-10 | 8.26E-03 | 2.49E-07 | 5.19E-11 | 0.00211214  | 1.67E-07   |          |
| phe.Fasting_ | rs185069296 | S15 | "LOC100505(rs734069   | S19         | NA         | 2.06E-08 | 8.39E-01 | 1.81E-05 | 6.71E-10 | 0.0272994   | 1.68E-06   |          |
| phe.Fasting_ | rs185069296 | S15 | "LOC100505(rs73619637 | S8          | NA         | 1.44E-15 | 5.89E-08 | 4.14E-12 | 2.05E-10 | 0.00833668  | 5.78E-07   |          |
| phe.Fasting_ | rs185069296 | S15 | "LOC100505(rs74627895 | S8          | TMEM64     | 7.32E-07 | 1.00E+00 | 4.60E-04 | 2.03E-08 | 0.828094    | 3.48E-05   |          |
| phe.Fasting_ | rs185069296 | S15 | "LOC100505(rs74914207 | S24         | NA         | 1.37E-10 | 5.59E-03 | 1.73E-07 | 9.12E-11 | 0.0037135   | 2.80E-07   |          |
| phe.Fasting_ | rs185069296 | S15 | "LOC100505(rs75350765 | S5          | RCL1       | 1.82E-16 | 7.42E-09 | 6.37E-13 | 3.70E-08 | 1           | 5.84E-05   |          |
| phe.Fasting_ | rs185069296 | S15 | "LOC100505(rs75374128 | S5          | CNTLN      | 1.47E-16 | 6.01E-09 | 5.72E-13 | 1.01E-07 | 1           | 1.42E-04   |          |
| phe.Fasting_ | rs185069296 | S15 | "LOC100505(rs75506779 | S5          | TMCO3      | 5.55E-07 | 1.00E+00 | 3.61E-04 | 1.10E-08 | 0.449707    | 2.03E-05   |          |
| phe.Fasting_ | rs185069296 | S15 | "LOC100505(rs75758702 | S24         | NA         | 7.02E-17 | 2.87E-09 | 3.16E-13 | 1.57E-10 | 0.00638323  | 4.59E-07   |          |
| phe.Fasting_ | rs185069296 | S15 | "LOC100505(rs75864203 | S8          | CNTLN      | 1.47E-16 | 6.01E-09 | 5.72E-13 | 1.01E-07 | 1           | 1.42E-04   |          |
| phe.Fasting_ | rs185069296 | S15 | "LOC100505(rs75949566 | S5          | TMEM64     | 2.76E-06 | 1.00E+00 | 1.47E-03 | 8.48E-11 | 0.00345267  | 2.62E-07   |          |
| phe.Fasting_ | rs185069296 | S15 | "LOC100505(rs76844308 | S8          | CNTLN      | 7.68E-17 | 3.14E-09 | 3.41E-13 | 9.52E-08 | 1           | 1.35E-04   |          |
| phe.Fasting_ | rs185069296 | S15 | "LOC100505(rs7763107  | S8          | FARS2      | 5.78E-16 | 2.36E-08 | 1.79E-12 | 9.23E-12 | 0.000375564 | 3.44E-08   |          |
| phe.Fasting_ | rs185069296 | S15 | "LOC100505(rs77798597 | S7          | KPNA3      | 2.97E-15 | 1.21E-07 | 8.14E-12 | 1.09E-13 | 4.44E-06    | 6.79E-10   |          |
| phe.Fasting_ | rs185069296 | S15 | "LOC100505(rs77845645 | S21         | NA         | 1.53E-06 | 1.00E+00 | 8.88E-04 | 4.20E-11 | 0.00170882  | 1.38E-07   |          |
| phe.Fasting_ | rs185069296 | S15 | "LOC100505(rs78353402 | S8          | AP3M2      | 4.51E-15 | 1.84E-07 | 1.18E-11 | 3.87E-07 | 1           | 4.75E-04   |          |
| phe.Fasting_ | rs185069296 | S15 | "LOC100505(rs78516788 | S8          | SLC38A1    | 2.75E-11 | 1.12E-03 | 3.94E-08 | 2.44E-10 | 0.00992686  | 6.74E-07   |          |
| phe.Fasting_ | rs185069296 | S15 | "LOC100505(rs78697063 | S5          | MSI2       | 8.23E-19 | 3.36E-11 | 2.70E-14 | 6.84E-10 | 0.0278369   | 1.70E-06   |          |
| phe.Fasting_ | rs185069296 | S15 | "LOC100505(rs78722272 | S5          | CNTLN      | 1.47E-16 | 6.01E-09 | 5.72E-13 | 1.05E-07 | 1           | 1.48E-04   |          |
| phe.Fasting_ | rs185069296 | S15 | "LOC100505(rs78736524 | S5          | KPNA3      | 2.97E-15 | 1.21E-07 | 8.14E-12 | 1.18E-13 | 4.80E-06    | 7.06E-10   |          |
| phe.Fasting_ | rs185069296 | S15 | "LOC100505(rs78990344 | S2          | LOC1005063 | 2.37E-06 | 1.00E+00 | 1.30E-03 | 6.78E-11 | 0.00276161  | 2.13E-07   |          |
| phe.Fasting_ | rs185069296 | S15 | "LOC100505(rs79781495 | S8          | KPNA3      | 2.97E-15 | 1.21E-07 | 8.14E-12 | 1.09E-13 | 4.44E-06    | 6.79E-10   |          |
| phe.Fasting_ | rs185069296 | S15 | "LOC100505(rs79886603 | S15         | NA         | 8.71E-08 | 1.00E+00 | 6.74E-05 | 4.66E-07 | 1           | 5.59E-04   |          |
| phe.Fasting_ | rs185069296 | S15 | "LOC100505(rs80200953 | S8          | PPP2R5D    | 8.49E-17 | 3.47E-09 | 3.69E-13 | 3.65E-09 | 0.148399    | 7.55E-06   |          |
| phe.Fasting_ | rs185069296 | S15 | "LOC100505(rs80332465 | S5          | KPNA3      | 3.13E-15 | 1.28E-07 | 8.51E-12 | 1.17E-13 | 4.77E-06    | 7.06E-10   |          |
| phe.Fasting_ | rs185069296 | S15 | "LOC100505(rs80334773 | S5          | KPNA3      | 3.13E-15 | 1.28E-07 | 8.51E-12 | 1.17E-13 | 4.77E-06    | 7.06E-10   |          |
| phe.Fasting_ | rs185502834 | S8  | DIAPH1                | rs111576333 | S5         | TMEM64   | 5.56E-07 | 1.00E+00 | 3.61E-04 | 7.80E-15    | 3.17E-07   | 6.90E-11 |
| phe.Fasting_ | rs185502834 | S8  | DIAPH1                | rs112089881 | S8         | ZFAND4   | 3.24E-18 | 1.32E-10 | 5.45E-14 | 1.95E-10    | 0.00795558 | 5.56E-07 |
| phe.Fasting_ | rs185502834 | S8  | DIAPH1                | rs112091318 | S5         | TMEM64   | 1.64E-07 | 1.00E+00 | 1.18E-04 | 9.13E-09    | 0.371559   | 1.72E-05 |
| phe.Fasting_ | rs185502834 | S8  | DIAPH1                | rs114334325 | S7         | AP3M2    | 1.25E-15 | 5.12E-08 | 3.65E-12 | 8.81E-08    | 1          | 1.26E-04 |
| phe.Fasting_ | rs185502834 | S8  | DIAPH1                | rs114394395 | S7         | AP3M2    | 1.33E-15 | 5.44E-08 | 3.85E-12 | 8.81E-08    | 1          | 1.26E-04 |
| phe.Fasting_ | rs185502834 | S8  | DIAPH1                | rs114565620 | S8         | RCL1     | 2.03E-17 | 8.30E-10 | 1.43E-13 | 8.23E-09    | 0.335069   | 1.57E-05 |
| phe.Fasting_ | rs185502834 | S8  | DIAPH1                | rs115083290 | S19        | NA       | 8.17E-17 | 3.34E-09 | 3.58E-13 | 2.77E-09    | 0.11274    | 5.90E-06 |
| phe.Fasting_ | rs185502834 | S8  | DIAPH1                | rs115752779 | S19        | NA       | 8.17E-17 | 3.34E-09 | 3.58E-13 | 2.77E-09    | 0.11274    | 5.90E-06 |
| phe.Fasting_ | rs185502834 | S8  | DIAPH1                | rs115787552 | S5         | KPNA3    | 5.05E-16 | 2.06E-08 | 1.59E-12 | 2.34E-14    | 9.53E-07   | 1.79E-10 |
| phe.Fasting_ | rs185502834 | S8  | DIAPH1                | rs115888477 | S8         | NA       | 3.68E-15 | 1.50E-07 | 9.90E-12 | 4.11E-15    | 1.67E-07   | 3.84E-11 |
| phe.Fasting_ | rs185502834 | S8  | DIAPH1                | rs116011837 | S9         | BRD2     | 9.60E-12 | 3.92E-04 | 1.53E-08 | 9.05E-15    | 3.68E-07   | 7.90E-11 |
| phe.Fasting_ | rs185502834 | S8  | DIAPH1                | rs116079984 | S8         | KPNA3    | 5.05E-16 | 2.06E-08 | 1.59E-12 | 2.56E-14    | 1.04E-06   | 1.94E-10 |

|                            |        |                |             |          |             |            |          |             |          |
|----------------------------|--------|----------------|-------------|----------|-------------|------------|----------|-------------|----------|
| phe.Fasting_rs185502834 S8 | DIAPH1 | rs116120727 S9 | BRD2        | 9.60E-12 | 3.92E-04    | 1.53E-08   | 9.05E-15 | 3.68E-07    | 7.90E-11 |
| phe.Fasting_rs185502834 S8 | DIAPH1 | rs116406581 S2 | NA          | 5.24E-15 | 2.14E-07    | 1.36E-11   | 5.32E-08 | 1           | 8.11E-05 |
| phe.Fasting_rs185502834 S8 | DIAPH1 | rs116548615 S8 | TMEM45B     | 2.95E-17 | 1.21E-09    | 1.69E-13   | 1.76E-12 | 7.17E-05    | 7.72E-09 |
| phe.Fasting_rs185502834 S8 | DIAPH1 | rs116696844 S3 | AP3M2       | 1.90E-15 | 7.75E-08    | 5.41E-12   | 8.81E-08 | 1           | 1.26E-04 |
| phe.Fasting_rs185502834 S8 | DIAPH1 | rs11989304 S4  | TMEM64      | 5.56E-07 | 1.00E+00    | 3.61E-04   | 1.11E-11 | 0.000453381 | 4.10E-08 |
| phe.Fasting_rs185502834 S8 | DIAPH1 | rs140524622 S7 | MRPL10      | 1.81E-17 | 7.37E-10    | 1.32E-13   | 2.83E-06 | 1           | 2.79E-03 |
| phe.Fasting_rs185502834 S8 | DIAPH1 | rs146815317 S5 | KPNA3       | 5.05E-16 | 2.06E-08    | 1.59E-12   | 2.34E-14 | 9.53E-07    | 1.79E-10 |
| phe.Fasting_rs185502834 S8 | DIAPH1 | rs150117838 S8 | KPNA3       | 5.05E-16 | 2.06E-08    | 1.59E-12   | 2.16E-14 | 8.80E-07    | 1.71E-10 |
| phe.Fasting_rs185502834 S8 | DIAPH1 | rs150916187 S4 | HIST1H2BK   | 4.14E-06 | 1           | 0.00210616 | 2.61E-15 | 1.06E-07    | 2.55E-11 |
| phe.Fasting_rs185502834 S8 | DIAPH1 | rs16894241 S4  | HIST1H2BK   | 3.73E-12 | 0.000152384 | 6.73E-09   | 6.62E-15 | 2.69E-07    | 5.94E-11 |
| phe.Fasting_rs185502834 S8 | DIAPH1 | rs34801978 S3  | HOXB2       | 2.19E-06 | 1           | 0.00120758 | 1.65E-09 | 0.0670533   | 3.72E-06 |
| phe.Fasting_rs185502834 S8 | DIAPH1 | rs4732511 S13  | POR         | 9.61E-15 | 3.93E-07    | 2.45E-11   | 2.36E-06 | 1           | 2.39E-03 |
| phe.Fasting_rs185502834 S8 | DIAPH1 | rs57503635 S3  | NA          | 1.28E-16 | 5.23E-09    | 5.19E-13   | 6.61E-15 | 2.69E-07    | 5.94E-11 |
| phe.Fasting_rs185502834 S8 | DIAPH1 | rs60011869 S16 | NA          | 2.13E-06 | 1           | 0.00118391 | 1.78E-07 | 1           | 2.39E-04 |
| phe.Fasting_rs185502834 S8 | DIAPH1 | rs6964407 S7   | POR         | 3.32E-14 | 1.36E-06    | 8.04E-11   | 2.16E-06 | 1           | 2.22E-03 |
| phe.Fasting_rs185502834 S8 | DIAPH1 | rs7004597 S8   | NA          | 1.25E-15 | 5.12E-08    | 3.65E-12   | 5.12E-08 | 1           | 7.84E-05 |
| phe.Fasting_rs185502834 S8 | DIAPH1 | rs7256517 S7   | CYTH2       | 1.59E-16 | 6.48E-09    | 6.03E-13   | 9.69E-13 | 3.95E-05    | 4.59E-09 |
| phe.Fasting_rs185502834 S8 | DIAPH1 | rs73283603 S7  | ZWINT       | 4.49E-07 | 1           | 2.97E-04   | 4.53E-08 | 1           | 7.02E-05 |
| phe.Fasting_rs185502834 S8 | DIAPH1 | rs73392640 S8  | POLR3B      | 4.58E-11 | 0.00187102  | 6.24E-08   | 6.82E-12 | 0.000277641 | 2.62E-08 |
| phe.Fasting_rs185502834 S8 | DIAPH1 | rs73619637 S8  | NA          | 2.00E-16 | 8.15E-09    | 6.95E-13   | 6.35E-08 | 1           | 9.54E-05 |
| phe.Fasting_rs185502834 S8 | DIAPH1 | rs74627895 S8  | TMEM64      | 1.64E-07 | 1.00E+00    | 1.18E-04   | 4.42E-09 | 0.179944    | 8.98E-06 |
| phe.Fasting_rs185502834 S8 | DIAPH1 | rs74914207 S24 | NA          | 2.89E-11 | 1.18E-03    | 4.13E-08   | 1.56E-11 | 0.000634366 | 5.60E-08 |
| phe.Fasting_rs185502834 S8 | DIAPH1 | rs75350765 S5  | RCL1        | 2.03E-17 | 8.30E-10    | 1.43E-13   | 8.23E-09 | 0.335069    | 1.57E-05 |
| phe.Fasting_rs185502834 S8 | DIAPH1 | rs75374128 S5  | CNTLN       | 5.25E-06 | 1.00E+00    | 2.60E-03   | 1.83E-08 | 0.746586    | 3.18E-05 |
| phe.Fasting_rs185502834 S8 | DIAPH1 | rs75506779 S5  | TMCO3       | 1.04E-07 | 1.00E+00    | 7.88E-05   | 2.32E-09 | 0.0942949   | 5.04E-06 |
| phe.Fasting_rs185502834 S8 | DIAPH1 | rs75758702 S24 | NA          | 1.04E-17 | 4.25E-10    | 9.89E-14   | 2.85E-11 | 0.00115844  | 9.77E-08 |
| phe.Fasting_rs185502834 S8 | DIAPH1 | rs75864203 S8  | CNTLN       | 5.25E-06 | 1           | 2.60E-03   | 1.83E-08 | 0.746586    | 3.18E-05 |
| phe.Fasting_rs185502834 S8 | DIAPH1 | rs75949566 S5  | TMEM64      | 6.52E-07 | 1.00E+00    | 4.16E-04   | 1.49E-11 | 0.000607747 | 5.38E-08 |
| phe.Fasting_rs185502834 S8 | DIAPH1 | rs76844308 S8  | CNTLN       | 2.67E-06 | 1           | 1.44E-03   | 1.80E-08 | 0.73432     | 3.14E-05 |
| phe.Fasting_rs185502834 S8 | DIAPH1 | rs7763107 S8   | FARS2       | 9.44E-17 | 3.86E-09    | 4.06E-13   | 1.60E-12 | 6.52E-05    | 7.13E-09 |
| phe.Fasting_rs185502834 S8 | DIAPH1 | rs77798597 S7  | KPNA3       | 5.05E-16 | 2.06E-08    | 1.59E-12   | 2.16E-14 | 8.80E-07    | 1.71E-10 |
| phe.Fasting_rs185502834 S8 | DIAPH1 | rs77845645 S21 | NA          | 3.35E-07 | 1           | 2.29E-04   | 1.04E-11 | 0.000424266 | 3.85E-08 |
| phe.Fasting_rs185502834 S8 | DIAPH1 | rs78353402 S8  | AP3M2       | 1.25E-15 | 5.12E-08    | 3.65E-12   | 8.81E-08 | 1           | 1.26E-04 |
| phe.Fasting_rs185502834 S8 | DIAPH1 | rs78516788 S8  | SLC38A1     | 1.24E-06 | 1.00E+00    | 7.38E-04   | 2.76E-09 | 0.112313    | 5.89E-06 |
| phe.Fasting_rs185502834 S8 | DIAPH1 | rs78697063 S5  | MSI2        | 7.77E-20 | 3.17E-12    | 2.23E-14   | 1.45E-10 | 0.00591847  | 4.35E-07 |
| phe.Fasting_rs185502834 S8 | DIAPH1 | rs78703708 S7  | FAF2        | 7.40E-12 | 3.02E-04    | 1.27E-08   | 7.08E-06 | 1           | 6.12E-03 |
| phe.Fasting_rs185502834 S8 | DIAPH1 | rs78722272 S5  | CNTLN       | 5.25E-06 | 1.00E+00    | 2.60E-03   | 1.89E-08 | 0.767323    | 3.26E-05 |
| phe.Fasting_rs185502834 S8 | DIAPH1 | rs78736524 S5  | KPNA3       | 5.05E-16 | 2.06E-08    | 1.59E-12   | 2.34E-14 | 9.53E-07    | 1.79E-10 |
| phe.Fasting_rs185502834 S8 | DIAPH1 | rs78990344 S2  | LOC10050631 | 5.56E-07 | 1.00E+00    | 3.61E-04   | 1.11E-11 | 0.000453381 | 4.10E-08 |
| phe.Fasting_rs185502834 S8 | DIAPH1 | rs79781495 S8  | KPNA3       | 5.05E-16 | 2.06E-08    | 1.59E-12   | 2.16E-14 | 8.80E-07    | 1.71E-10 |



|                           |        |                |           |          |           |          |          |             |          |
|---------------------------|--------|----------------|-----------|----------|-----------|----------|----------|-------------|----------|
| phe.Fasting_rs185502834S8 | DIAPH1 | rs80200953 S8  | PPP2R5D   | 1.41E-17 | 5.76E-10  | 1.14E-13 | 8.37E-10 | 0.034062    | 2.03E-06 |
| phe.Fasting_rs185502834S8 | DIAPH1 | rs80332465 S5  | KPNA3     | 5.36E-16 | 2.19E-08  | 1.67E-12 | 2.32E-14 | 9.45E-07    | 1.79E-10 |
| phe.Fasting_rs185502834S8 | DIAPH1 | rs80334773 S5  | KPNA3     | 5.36E-16 | 2.19E-08  | 1.67E-12 | 2.32E-14 | 9.45E-07    | 1.79E-10 |
| phe.Fasting_rs185502834S8 | DIAPH1 | rs891061 S7    | POP4      | 6.59E-07 | 1.00E+00  | 4.20E-04 | 1.19E-05 | 1           | 9.35E-03 |
| phe.Fasting_rs185759881S7 | DIAPH1 | rs111576333S5  | TMEM64    | 2.37E-06 | 1.00E+00  | 1.30E-03 | 5.87E-14 | 2.39E-06    | 3.99E-10 |
| phe.Fasting_rs185759881S7 | DIAPH1 | rs112089881S8  | ZFAND4    | 2.04E-17 | 8.32E-10  | 1.43E-13 | 1.09E-09 | 0.0445256   | 2.58E-06 |
| phe.Fasting_rs185759881S7 | DIAPH1 | rs112091318S5  | TMEM64    | 7.32E-07 | 1.00E+00  | 4.60E-04 | 3.91E-08 | 1           | 6.13E-05 |
| phe.Fasting_rs185759881S7 | DIAPH1 | rs114334325S7  | AP3M2     | 4.51E-15 | 1.84E-07  | 1.18E-11 | 3.87E-07 | 1           | 4.75E-04 |
| phe.Fasting_rs185759881S7 | DIAPH1 | rs114394395S7  | AP3M2     | 4.81E-15 | 1.97E-07  | 1.25E-11 | 3.87E-07 | 1           | 4.75E-04 |
| phe.Fasting_rs185759881S7 | DIAPH1 | rs114565620S8  | RCL1      | 1.82E-16 | 7.42E-09  | 6.37E-13 | 3.70E-08 | 1           | 5.84E-05 |
| phe.Fasting_rs185759881S7 | DIAPH1 | rs115083290S19 | NA        | 4.38E-16 | 1.79E-08  | 1.40E-12 | 1.42E-08 | 0.576679    | 2.53E-05 |
| phe.Fasting_rs185759881S7 | DIAPH1 | rs11524145 S5  | CDK6      | 7.80E-07 | 1.00E+00  | 4.86E-04 | 7.89E-06 | 1           | 6.69E-03 |
| phe.Fasting_rs185759881S7 | DIAPH1 | rs115752779S19 | NA        | 4.38E-16 | 1.79E-08  | 1.40E-12 | 1.42E-08 | 0.576679    | 2.53E-05 |
| phe.Fasting_rs185759881S7 | DIAPH1 | rs115787552S5  | KPNA3     | 2.97E-15 | 1.21E-07  | 8.14E-12 | 1.18E-13 | 4.80E-06    | 7.06E-10 |
| phe.Fasting_rs185759881S7 | DIAPH1 | rs115888477 S8 | NA        | 2.03E-14 | 8.28E-07  | 5.02E-11 | 2.21E-14 | 8.99E-07    | 1.73E-10 |
| phe.Fasting_rs185759881S7 | DIAPH1 | rs116011837S9  | BRD2      | 4.89E-11 | 2.00E-03  | 6.62E-08 | 4.07E-14 | 1.66E-06    | 2.85E-10 |
| phe.Fasting_rs185759881S7 | DIAPH1 | rs116079984S8  | KPNA3     | 2.97E-15 | 1.21E-07  | 8.14E-12 | 1.24E-13 | 5.04E-06    | 7.34E-10 |
| phe.Fasting_rs185759881S7 | DIAPH1 | rs116120727 S9 | BRD2      | 4.89E-11 | 2.00E-03  | 6.62E-08 | 4.07E-14 | 1.66E-06    | 2.85E-10 |
| phe.Fasting_rs185759881S7 | DIAPH1 | rs116406581S2  | NA        | 1.81E-14 | 7.39E-07  | 4.52E-11 | 2.35E-07 | 1           | 3.05E-04 |
| phe.Fasting_rs185759881S7 | DIAPH1 | rs116548615S8  | TMEM45B   | 1.73E-16 | 7.06E-09  | 6.15E-13 | 8.70E-12 | 0.000354153 | 3.26E-08 |
| phe.Fasting_rs185759881S7 | DIAPH1 | rs116696844S3  | AP3M2     | 6.92E-15 | 2.83E-07  | 1.78E-11 | 3.87E-07 | 1           | 4.75E-04 |
| phe.Fasting_rs185759881S7 | DIAPH1 | rs11989304 S4  | TMEM64    | 2.37E-06 | 1.00E+00  | 1.30E-03 | 6.78E-11 | 0.00276161  | 2.13E-07 |
| phe.Fasting_rs185759881S7 | DIAPH1 | rs140524622S7  | MRPL10    | 1.08E-16 | 4.41E-09  | 4.54E-13 | 7.35E-06 | 1           | 6.31E-03 |
| phe.Fasting_rs185759881S7 | DIAPH1 | rs146815317 S5 | KPNA3     | 2.97E-15 | 1.21E-07  | 8.14E-12 | 1.18E-13 | 4.80E-06    | 7.06E-10 |
| phe.Fasting_rs185759881S7 | DIAPH1 | rs150117838S8  | KPNA3     | 2.97E-15 | 1.21E-07  | 8.14E-12 | 1.09E-13 | 4.44E-06    | 6.79E-10 |
| phe.Fasting_rs185759881S7 | DIAPH1 | rs150916187S4  | HIST1H2BK | 1.38E-05 | 1.00E+00  | 6.05E-03 | 1.37E-14 | 5.59E-07    | 1.16E-10 |
| phe.Fasting_rs185759881S7 | DIAPH1 | rs16894241 S4  | HIST1H2BK | 1.99E-11 | 8.12E-04  | 2.96E-08 | 3.44E-14 | 1.40E-06    | 2.50E-10 |
| phe.Fasting_rs185759881S7 | DIAPH1 | rs2032062 S8   | NA        | 1.22E-14 | 4.98E-07  | 3.09E-11 | 8.48E-06 | 1           | 7.14E-03 |
| phe.Fasting_rs185759881S7 | DIAPH1 | rs2153597 S8   | ZNF438    | 5.51E-11 | 2.25E-03  | 7.42E-08 | 4.52E-09 | 0.183916    | 9.08E-06 |
| phe.Fasting_rs185759881S7 | DIAPH1 | rs2835656 S7   | TTC3      | 3.01E-10 | 1.23E-02  | 3.60E-07 | 9.12E-06 | 1           | 7.57E-03 |
| phe.Fasting_rs185759881S7 | DIAPH1 | rs34801978 S3  | HOXB2     | 1.23E-05 | 1.00E+00  | 5.46E-03 | 1.03E-08 | 0.419057    | 1.90E-05 |
| phe.Fasting_rs185759881S7 | DIAPH1 | rs352346 S3    | GRPEL2    | 1.85E-11 | 7.55E-04  | 2.78E-08 | 8.42E-06 | 1           | 7.10E-03 |
| phe.Fasting_rs185759881S7 | DIAPH1 | rs3750898 S8   | DCLRE1A   | 2.29E-05 | 1.00E+00  | 9.35E-03 | 8.76E-06 | 1           | 7.32E-03 |
| phe.Fasting_rs185759881S7 | DIAPH1 | rs4732511 S13  | POR       | 2.30E-15 | 9.39E-08  | 6.48E-12 | 9.65E-06 | 1           | 7.93E-03 |
| phe.Fasting_rs185759881S7 | DIAPH1 | rs57503635 S3  | NA        | 6.34E-16 | 2.59E-08  | 1.95E-12 | 3.17E-14 | 1.29E-06    | 2.34E-10 |
| phe.Fasting_rs185759881S7 | DIAPH1 | rs58905476 S7  | TTC3      | 3.29E-10 | 0.0134302 | 3.90E-07 | 9.79E-06 | 1           | 8.01E-03 |
| phe.Fasting_rs185759881S7 | DIAPH1 | rs60011869 S16 | NA        | 1.04E-05 | 1         | 4.72E-03 | 8.16E-10 | 0.0332257   | 1.98E-06 |
| phe.Fasting_rs185759881S7 | DIAPH1 | rs6964407 S7   | POR       | 7.55E-15 | 3.08E-07  | 1.94E-11 | 8.91E-06 | 1           | 7.43E-03 |
| phe.Fasting_rs185759881S7 | DIAPH1 | rs7004597 S8   | NA        | 4.51E-15 | 1.84E-07  | 1.18E-11 | 2.34E-07 | 1           | 3.04E-04 |
| phe.Fasting_rs185759881S7 | DIAPH1 | rs7256517 S7   | CYTH2     | 1.04E-15 | 4.24E-08  | 3.06E-12 | 4.82E-12 | 0.000196022 | 1.91E-08 |

|                            |                       |            |         |             |          |            |          |             |             |          |
|----------------------------|-----------------------|------------|---------|-------------|----------|------------|----------|-------------|-------------|----------|
| phe.Fasting_rs185759881S7  | DIAPH1                | rs73283603 | S7      | ZWINT       | 1.90E-06 | 1          | 1.07E-03 | 2.03E-07    | 1           | 2.68E-04 |
| phe.Fasting_rs185759881S7  | DIAPH1                | rs73392640 | S8      | POLR3B      | 2.02E-10 | 0.00826001 | 2.49E-07 | 5.19E-11    | 0.00211214  | 1.67E-07 |
| phe.Fasting_rs185759881S7  | DIAPH1                | rs734069   | S19     | NA          | 2.06E-08 | 0.839421   | 1.81E-05 | 6.71E-10    | 0.0272994   | 1.68E-06 |
| phe.Fasting_rs185759881S7  | DIAPH1                | rs73619637 | S8      | NA          | 1.44E-15 | 5.89E-08   | 4.14E-12 | 2.05E-10    | 0.00833668  | 5.78E-07 |
| phe.Fasting_rs185759881S7  | DIAPH1                | rs74627895 | S8      | TMEM64      | 7.32E-07 | 1          | 4.60E-04 | 2.03E-08    | 0.828094    | 3.48E-05 |
| phe.Fasting_rs185759881S7  | DIAPH1                | rs74914207 | S24     | NA          | 1.37E-10 | 0.00558626 | 1.73E-07 | 9.12E-11    | 0.0037135   | 2.80E-07 |
| phe.Fasting_rs185759881S7  | DIAPH1                | rs75350765 | S5      | RCL1        | 1.82E-16 | 7.42E-09   | 6.37E-13 | 3.70E-08    | 1           | 5.84E-05 |
| phe.Fasting_rs185759881S7  | DIAPH1                | rs75374128 | S5      | CNTLN       | 1.47E-16 | 6.01E-09   | 5.72E-13 | 1.01E-07    | 1           | 1.42E-04 |
| phe.Fasting_rs185759881S7  | DIAPH1                | rs75506779 | S5      | TMCO3       | 5.55E-07 | 1          | 3.61E-04 | 1.10E-08    | 0.449707    | 2.03E-05 |
| phe.Fasting_rs185759881S7  | DIAPH1                | rs75758702 | S24     | NA          | 7.02E-17 | 2.87E-09   | 3.16E-13 | 1.57E-10    | 0.00638323  | 4.59E-07 |
| phe.Fasting_rs185759881S7  | DIAPH1                | rs75864203 | S8      | CNTLN       | 1.47E-16 | 6.01E-09   | 5.72E-13 | 1.01E-07    | 1           | 1.42E-04 |
| phe.Fasting_rs185759881S7  | DIAPH1                | rs75949566 | S5      | TMEM64      | 2.76E-06 | 1          | 1.47E-03 | 8.48E-11    | 0.00345267  | 2.62E-07 |
| phe.Fasting_rs185759881S7  | DIAPH1                | rs76844308 | S8      | CNTLN       | 7.68E-17 | 3.14E-09   | 3.41E-13 | 9.52E-08    | 1           | 1.35E-04 |
| phe.Fasting_rs185759881S7  | DIAPH1                | rs7763107  | S8      | FARS2       | 5.78E-16 | 2.36E-08   | 1.79E-12 | 9.23E-12    | 0.000375564 | 3.44E-08 |
| phe.Fasting_rs185759881S7  | DIAPH1                | rs77798597 | S7      | KPNA3       | 2.97E-15 | 1.21E-07   | 8.14E-12 | 1.09E-13    | 4.44E-06    | 6.79E-10 |
| phe.Fasting_rs185759881S7  | DIAPH1                | rs77845645 | S21     | NA          | 1.53E-06 | 1          | 8.88E-04 | 4.20E-11    | 0.00170882  | 1.38E-07 |
| phe.Fasting_rs185759881S7  | DIAPH1                | rs78353402 | S8      | AP3M2       | 4.51E-15 | 1.84E-07   | 1.18E-11 | 3.87E-07    | 1           | 4.75E-04 |
| phe.Fasting_rs185759881S7  | DIAPH1                | rs78516788 | S8      | SLC38A1     | 2.75E-11 | 0.00112269 | 3.94E-08 | 2.44E-10    | 0.00992686  | 6.74E-07 |
| phe.Fasting_rs185759881S7  | DIAPH1                | rs78697063 | S5      | MSI2        | 8.23E-19 | 3.36E-11   | 2.70E-14 | 6.84E-10    | 0.0278369   | 1.70E-06 |
| phe.Fasting_rs185759881S7  | DIAPH1                | rs78722272 | S5      | CNTLN       | 1.47E-16 | 6.01E-09   | 5.72E-13 | 1.05E-07    | 1           | 1.48E-04 |
| phe.Fasting_rs185759881S7  | DIAPH1                | rs78736524 | S5      | KPNA3       | 2.97E-15 | 1.21E-07   | 8.14E-12 | 1.18E-13    | 4.80E-06    | 7.06E-10 |
| phe.Fasting_rs185759881S7  | DIAPH1                | rs78990344 | S2      | LOC10050631 | 2.37E-06 | 1          | 1.30E-03 | 6.78E-11    | 0.00276161  | 2.13E-07 |
| phe.Fasting_rs185759881S7  | DIAPH1                | rs79781495 | S8      | KPNA3       | 2.97E-15 | 1.21E-07   | 8.14E-12 | 1.09E-13    | 4.44E-06    | 6.79E-10 |
| phe.Fasting_rs185759881S7  | DIAPH1                | rs79886603 | S15     | NA          | 8.71E-08 | 1.00E+00   | 6.74E-05 | 4.66E-07    | 1           | 5.59E-04 |
| phe.Fasting_rs185759881S7  | DIAPH1                | rs80200953 | S8      | PPP2R5D     | 8.49E-17 | 3.47E-09   | 3.69E-13 | 3.65E-09    | 0.148399    | 7.55E-06 |
| phe.Fasting_rs185759881S7  | DIAPH1                | rs80332465 | S5      | KPNA3       | 3.13E-15 | 1.28E-07   | 8.51E-12 | 1.17E-13    | 4.77E-06    | 7.06E-10 |
| phe.Fasting_rs185759881S7  | DIAPH1                | rs80334773 | S5      | KPNA3       | 3.13E-15 | 1.28E-07   | 8.51E-12 | 1.17E-13    | 4.77E-06    | 7.06E-10 |
| phe.Fasting_rs186288044S21 | "PCDHGB4,Prs112089881 | S8         | ZFAND4  | 1.96E-18    | 7.99E-11 | 4.03E-14   | 3.02E-10 | 0.0122912   | 1           | 8.15E-07 |
| phe.Fasting_rs186288044S21 | "PCDHGB4,Prs112091318 | S5         | TMEM64  | 1.52E-05    | 1        | 6.58E-03   | 2.56E-07 | 1           | 1           | 3.30E-04 |
| phe.Fasting_rs186288044S21 | "PCDHGB4,Prs114334325 | S7         | AP3M2   | 8.70E-16    | 3.55E-08 | 2.60E-12   | 5.52E-06 | 1           | 1           | 4.97E-03 |
| phe.Fasting_rs186288044S21 | "PCDHGB4,Prs114394395 | S7         | AP3M2   | 9.30E-16    | 3.80E-08 | 2.77E-12   | 5.52E-06 | 1           | 1           | 4.97E-03 |
| phe.Fasting_rs186288044S21 | "PCDHGB4,Prs114565620 | S8         | RCL1    | 1.29E-17    | 5.26E-10 | 1.08E-13   | 1.39E-08 | 0.566303    | 1           | 2.49E-05 |
| phe.Fasting_rs186288044S21 | "PCDHGB4,Prs115305957 | S23        | NA      | 1.81E-05    | 1        | 7.66E-03   | 1.43E-12 | 5.82E-05    | 1           | 6.44E-09 |
| phe.Fasting_rs186288044S21 | "PCDHGB4,Prs115787552 | S5         | KPNA3   | 3.78E-16    | 1.54E-08 | 1.23E-12   | 4.20E-14 | 1.71E-06    | 1           | 2.93E-10 |
| phe.Fasting_rs186288044S21 | "PCDHGB4,Prs115888477 | S8         | NA      | 2.72E-15    | 1.11E-07 | 7.62E-12   | 7.36E-15 | 3.00E-07    | 1           | 6.53E-11 |
| phe.Fasting_rs186288044S21 | "PCDHGB4,Prs116011837 | S9         | BRD2    | 1.05E-06    | 1        | 6.32E-04   | 6.95E-14 | 2.83E-06    | 1           | 4.69E-10 |
| phe.Fasting_rs186288044S21 | "PCDHGB4,Prs116079984 | S8         | KPNA3   | 3.78E-16    | 1.54E-08 | 1.23E-12   | 4.48E-14 | 1.82E-06    | 1           | 3.11E-10 |
| phe.Fasting_rs186288044S21 | "PCDHGB4,Prs116120727 | S9         | BRD2    | 1.05E-06    | 1        | 6.32E-04   | 6.95E-14 | 2.83E-06    | 1           | 4.69E-10 |
| phe.Fasting_rs186288044S21 | "PCDHGB4,Prs116406581 | S2         | NA      | 3.68E-15    | 1.50E-07 | 9.90E-12   | 3.30E-06 | 1           | 1           | 3.18E-03 |
| phe.Fasting_rs186288044S21 | "PCDHGB4,Prs116548615 | S8         | TMEM45B | 2.04E-17    | 8.34E-10 | 1.43E-13   | 7.86E-12 | 0.000320069 | 1           | 2.98E-08 |

|                             |                           |           |          |          |          |          |             |          |
|-----------------------------|---------------------------|-----------|----------|----------|----------|----------|-------------|----------|
| phe.Fasting_rs186288044 S21 | "PCDHGB4,Pirs116696844 S3 | AP3M2     | 1.40E-15 | 5.70E-08 | 4.02E-12 | 5.52E-06 | 1           | 4.97E-03 |
| phe.Fasting_rs186288044 S21 | "PCDHGB4,Pirs146815317 S5 | KPNA3     | 3.78E-16 | 1.54E-08 | 1.23E-12 | 4.20E-14 | 1.71E-06    | 2.93E-10 |
| phe.Fasting_rs186288044 S21 | "PCDHGB4,Pirs150117838 S8 | KPNA3     | 3.78E-16 | 1.54E-08 | 1.23E-12 | 3.89E-14 | 1.58E-06    | 2.77E-10 |
| phe.Fasting_rs186288044 S21 | "PCDHGB4,Pirs16894241 S4  | HIST1H2BK | 1.90E-07 | 1.00E+00 | 1.36E-04 | 1.18E-14 | 4.80E-07    | 1.01E-10 |
| phe.Fasting_rs186288044 S21 | "PCDHGB4,Pirs2153597 S8   | ZNF438    | 5.42E-12 | 2.22E-04 | 9.59E-09 | 5.42E-06 | 1           | 4.90E-03 |
| phe.Fasting_rs186288044 S21 | "PCDHGB4,Pirs352346 S3    | GRPEL2    | 2.27E-07 | 1.00E+00 | 1.60E-04 | 1.07E-05 | 1           | 8.65E-03 |
| phe.Fasting_rs186288044 S21 | "PCDHGB4,Pirs57503635 S3  | NA        | 7.95E-08 | 1.00E+00 | 6.20E-05 | 1.16E-14 | 4.73E-07    | 1.00E-10 |
| phe.Fasting_rs186288044 S21 | "PCDHGB4,Pirs60011869 S16 | NA        | 1.45E-06 | 1.00E+00 | 8.45E-04 | 3.19E-10 | 0.0129858   | 8.56E-07 |
| phe.Fasting_rs186288044 S21 | "PCDHGB4,Pirs7004597 S8   | NA        | 8.70E-16 | 3.55E-08 | 2.60E-12 | 3.26E-06 | 1           | 3.15E-03 |
| phe.Fasting_rs186288044 S21 | "PCDHGB4,Pirs7256517 S7   | CYTH2     | 1.38E-16 | 5.63E-09 | 5.47E-13 | 2.91E-10 | 0.0118364   | 7.91E-07 |
| phe.Fasting_rs186288044 S21 | "PCDHGB4,Pirs73392640 S8  | POLR3B    | 3.00E-11 | 1.22E-03 | 4.24E-08 | 4.09E-10 | 0.0166326   | 1.07E-06 |
| phe.Fasting_rs186288044 S21 | "PCDHGB4,Pirs74627895 S8  | TMEM64    | 1.52E-05 | 1.00E+00 | 6.58E-03 | 1.28E-07 | 1           | 1.77E-04 |
| phe.Fasting_rs186288044 S21 | "PCDHGB4,Pirs74701059 S24 | C17orf102 | 1.84E-05 | 1.00E+00 | 7.76E-03 | 2.11E-12 | 8.58E-05    | 9.15E-09 |
| phe.Fasting_rs186288044 S21 | "PCDHGB4,Pirs74914207 S24 | NA        | 1.23E-11 | 5.03E-04 | 1.92E-08 | 1.49E-07 | 1           | 2.03E-04 |
| phe.Fasting_rs186288044 S21 | "PCDHGB4,Pirs75350765 S5  | RCL1      | 1.29E-17 | 5.26E-10 | 1.08E-13 | 1.39E-08 | 0.566303    | 2.49E-05 |
| phe.Fasting_rs186288044 S21 | "PCDHGB4,Pirs75374128 S5  | CNTLN     | 1.32E-17 | 5.41E-10 | 1.09E-13 | 2.01E-06 | 1           | 2.08E-03 |
| phe.Fasting_rs186288044 S21 | "PCDHGB4,Pirs75758702 S24 | NA        | 7.70E-18 | 3.14E-10 | 8.50E-14 | 6.42E-10 | 0.0261274   | 1.61E-06 |
| phe.Fasting_rs186288044 S21 | "PCDHGB4,Pirs75864203 S8  | CNTLN     | 1.32E-17 | 5.41E-10 | 1.09E-13 | 2.01E-06 | 1           | 2.08E-03 |
| phe.Fasting_rs186288044 S21 | "PCDHGB4,Pirs76844308 S8  | CNTLN     | 7.07E-18 | 2.89E-10 | 8.18E-14 | 1.78E-06 | 1           | 1.87E-03 |
| phe.Fasting_rs186288044 S21 | "PCDHGB4,Pirs7763107 S8   | FARS2     | 2.63E-08 | 1.00E+00 | 2.28E-05 | 3.07E-10 | 0.012484    | 8.27E-07 |
| phe.Fasting_rs186288044 S21 | "PCDHGB4,Pirs77798597 S7  | KPNA3     | 3.78E-16 | 1.54E-08 | 1.23E-12 | 3.89E-14 | 1.58E-06    | 2.77E-10 |
| phe.Fasting_rs186288044 S21 | "PCDHGB4,Pirs77845645 S21 | NA        | 2.15E-07 | 1.00E+00 | 1.52E-04 | 2.70E-11 | 0.00109923  | 9.29E-08 |
| phe.Fasting_rs186288044 S21 | "PCDHGB4,Pirs78353402 S8  | AP3M2     | 8.70E-16 | 3.55E-08 | 2.60E-12 | 5.52E-06 | 1           | 4.97E-03 |
| phe.Fasting_rs186288044 S21 | "PCDHGB4,Pirs78516788 S8  | SLC38A1   | 3.43E-12 | 1.40E-04 | 6.23E-09 | 7.67E-09 | 0.312323    | 1.47E-05 |
| phe.Fasting_rs186288044 S21 | "PCDHGB4,Pirs78697063 S5  | MSI2      | 4.23E-20 | 1.73E-12 | 2.23E-14 | 2.49E-10 | 0.0101226   | 6.85E-07 |
| phe.Fasting_rs186288044 S21 | "PCDHGB4,Pirs78722272 S5  | CNTLN     | 1.32E-17 | 5.41E-10 | 1.09E-13 | 2.07E-06 | 1           | 2.14E-03 |
| phe.Fasting_rs186288044 S21 | "PCDHGB4,Pirs78736524 S5  | KPNA3     | 3.78E-16 | 1.54E-08 | 1.23E-12 | 4.20E-14 | 1.71E-06    | 2.93E-10 |
| phe.Fasting_rs186288044 S21 | "PCDHGB4,Pirs79703349 S24 | C17orf102 | 1.84E-05 | 1.00E+00 | 7.76E-03 | 2.63E-12 | 0.000107117 | 1.13E-08 |
| phe.Fasting_rs186288044 S21 | "PCDHGB4,Pirs79781495 S8  | KPNA3     | 3.78E-16 | 1.54E-08 | 1.23E-12 | 3.89E-14 | 1.58E-06    | 2.77E-10 |
| phe.Fasting_rs186288044 S21 | "PCDHGB4,Pirs79886603 S15 | NA        | 1.10E-08 | 4.48E-01 | 1.01E-05 | 9.00E-06 | 1           | 7.49E-03 |
| phe.Fasting_rs186288044 S21 | "PCDHGB4,Pirs80200953 S8  | PPP2R5D   | 1.32E-08 | 5.39E-01 | 1.20E-05 | 3.10E-06 | 1           | 3.01E-03 |
| phe.Fasting_rs186288044 S21 | "PCDHGB4,Pirs80332465 S5  | KPNA3     | 4.04E-16 | 1.65E-08 | 1.31E-12 | 4.20E-14 | 1.71E-06    | 2.93E-10 |
| phe.Fasting_rs186288044 S21 | "PCDHGB4,Pirs80334773 S5  | KPNA3     | 4.04E-16 | 1.65E-08 | 1.31E-12 | 4.20E-14 | 1.71E-06    | 2.93E-10 |
| phe.Fasting_rs187000011 S11 | DIAPH1 rs111576333 S5     | TMEM64    | 2.37E-06 | 1.00E+00 | 1.30E-03 | 5.87E-14 | 2.39E-06    | 3.99E-10 |
| phe.Fasting_rs187000011 S11 | DIAPH1 rs112089881 S8     | ZFAND4    | 2.04E-17 | 8.32E-10 | 1.43E-13 | 1.09E-09 | 0.0445256   | 2.58E-06 |
| phe.Fasting_rs187000011 S11 | DIAPH1 rs112091318 S5     | TMEM64    | 7.32E-07 | 1.00E+00 | 4.60E-04 | 3.91E-08 | 1           | 6.13E-05 |
| phe.Fasting_rs187000011 S11 | DIAPH1 rs114334325 S7     | AP3M2     | 4.51E-15 | 1.84E-07 | 1.18E-11 | 3.87E-07 | 1           | 4.75E-04 |
| phe.Fasting_rs187000011 S11 | DIAPH1 rs114394395 S7     | AP3M2     | 4.81E-15 | 1.97E-07 | 1.25E-11 | 3.87E-07 | 1           | 4.75E-04 |
| phe.Fasting_rs187000011 S11 | DIAPH1 rs114565620 S8     | RCL1      | 1.82E-16 | 7.42E-09 | 6.37E-13 | 3.70E-08 | 1           | 5.84E-05 |
| phe.Fasting_rs187000011 S11 | DIAPH1 rs115083290 S19    | NA        | 4.38E-16 | 1.79E-08 | 1.40E-12 | 1.42E-08 | 0.576679    | 2.53E-05 |

|                            |        |                |           |          |             |             |          |             |          |
|----------------------------|--------|----------------|-----------|----------|-------------|-------------|----------|-------------|----------|
| phe.Fasting_rs187000011S11 | DIAPH1 | rs11524145 S5  | CDK6      | 7.80E-07 | 1.00E+00    | 4.86E-04    | 7.89E-06 | 1           | 6.69E-03 |
| phe.Fasting_rs187000011S11 | DIAPH1 | rs115752779S19 | NA        | 4.38E-16 | 1.79E-08    | 1.40E-12    | 1.42E-08 | 0.576679    | 2.53E-05 |
| phe.Fasting_rs187000011S11 | DIAPH1 | rs115787552S5  | KPNA3     | 2.97E-15 | 1.21E-07    | 8.14E-12    | 1.18E-13 | 4.80E-06    | 7.06E-10 |
| phe.Fasting_rs187000011S11 | DIAPH1 | rs115888477S8  | NA        | 2.03E-14 | 8.28E-07    | 5.02E-11    | 2.21E-14 | 8.99E-07    | 1.73E-10 |
| phe.Fasting_rs187000011S11 | DIAPH1 | rs116011837S9  | BRD2      | 4.89E-11 | 2.00E-03    | 6.62E-08    | 4.07E-14 | 1.66E-06    | 2.85E-10 |
| phe.Fasting_rs187000011S11 | DIAPH1 | rs116079984S8  | KPNA3     | 2.97E-15 | 1.21E-07    | 8.14E-12    | 1.24E-13 | 5.04E-06    | 7.34E-10 |
| phe.Fasting_rs187000011S11 | DIAPH1 | rs116120727S9  | BRD2      | 4.89E-11 | 0.00199774  | 6.62E-08    | 4.07E-14 | 1.66E-06    | 2.85E-10 |
| phe.Fasting_rs187000011S11 | DIAPH1 | rs116406581S2  | NA        | 1.81E-14 | 7.39E-07    | 4.52E-11    | 2.35E-07 | 1           | 3.05E-04 |
| phe.Fasting_rs187000011S11 | DIAPH1 | rs116548615S8  | TMEM45B   | 1.73E-16 | 7.06E-09    | 6.15E-13    | 8.70E-12 | 0.000354153 | 3.26E-08 |
| phe.Fasting_rs187000011S11 | DIAPH1 | rs116696844S3  | AP3M2     | 6.92E-15 | 2.83E-07    | 1.78E-11    | 3.87E-07 | 1           | 4.75E-04 |
| phe.Fasting_rs187000011S11 | DIAPH1 | rs11989304 S4  | TMEM64    | 2.37E-06 | 1           | 1.30E-03    | 6.78E-11 | 0.00276161  | 2.13E-07 |
| phe.Fasting_rs187000011S11 | DIAPH1 | rs140524622S7  | MRPL10    | 1.08E-16 | 4.41E-09    | 4.54E-13    | 7.35E-06 | 1           | 6.31E-03 |
| phe.Fasting_rs187000011S11 | DIAPH1 | rs146815317S5  | KPNA3     | 2.97E-15 | 1.21E-07    | 8.14E-12    | 1.18E-13 | 4.80E-06    | 7.06E-10 |
| phe.Fasting_rs187000011S11 | DIAPH1 | rs150117838S8  | KPNA3     | 2.97E-15 | 1.21E-07    | 8.14E-12    | 1.09E-13 | 4.44E-06    | 6.79E-10 |
| phe.Fasting_rs187000011S11 | DIAPH1 | rs150916187S4  | HIST1H2BK | 1.38E-05 | 1           | 6.05E-03    | 1.37E-14 | 5.59E-07    | 1.16E-10 |
| phe.Fasting_rs187000011S11 | DIAPH1 | rs16894241 S4  | HIST1H2BK | 1.99E-11 | 0.000812315 | 2.96E-08    | 3.44E-14 | 1.40E-06    | 2.50E-10 |
| phe.Fasting_rs187000011S11 | DIAPH1 | rs2032062 S8   | NA        | 1.22E-14 | 4.98E-07    | 3.09E-11    | 8.48E-06 | 1           | 7.14E-03 |
| phe.Fasting_rs187000011S11 | DIAPH1 | rs2153597 S8   | ZNF438    | 5.51E-11 | 0.00224928  | 7.42E-08    | 4.52E-09 | 0.183916    | 9.08E-06 |
| phe.Fasting_rs187000011S11 | DIAPH1 | rs2835656 S7   | TTC3      | 3.01E-10 | 1.23E-02    | 3.60E-07    | 9.12E-06 | 1           | 7.57E-03 |
| phe.Fasting_rs187000011S11 | DIAPH1 | rs34801978 S3  | HOXB2     | 1.23E-05 | 1.00E+00    | 5.46E-03    | 1.03E-08 | 0.419057    | 1.90E-05 |
| phe.Fasting_rs187000011S11 | DIAPH1 | rs352346 S3    | GRPEL2    | 1.85E-11 | 0.000754995 | 2.78E-08    | 8.42E-06 | 1           | 7.10E-03 |
| phe.Fasting_rs187000011S11 | DIAPH1 | rs3750898 S8   | DCLRE1A   | 2.29E-05 | 1.00E+00    | 9.35E-03    | 8.76E-06 | 1           | 7.32E-03 |
| phe.Fasting_rs187000011S11 | DIAPH1 | rs4732511 S13  | POR       | 2.30E-15 | 9.39E-08    | 6.48E-12    | 9.65E-06 | 1           | 7.93E-03 |
| phe.Fasting_rs187000011S11 | DIAPH1 | rs57503635 S3  | NA        | 6.34E-16 | 2.59E-08    | 1.95E-12    | 3.17E-14 | 1.29E-06    | 2.34E-10 |
| phe.Fasting_rs187000011S11 | DIAPH1 | rs58905476 S7  | TTC3      | 3.29E-10 | 1.34E-02    | 3.90E-07    | 9.79E-06 | 1           | 8.01E-03 |
| phe.Fasting_rs187000011S11 | DIAPH1 | rs60011869 S16 | NA        | 1.04E-05 | 1           | 0.00472365  | 8.16E-10 | 0.0332257   | 1.98E-06 |
| phe.Fasting_rs187000011S11 | DIAPH1 | rs6964407 S7   | POR       | 7.55E-15 | 3.08E-07    | 1.94E-11    | 8.91E-06 | 1           | 7.43E-03 |
| phe.Fasting_rs187000011S11 | DIAPH1 | rs7004597 S8   | NA        | 4.51E-15 | 1.84E-07    | 1.18E-11    | 2.34E-07 | 1           | 3.04E-04 |
| phe.Fasting_rs187000011S11 | DIAPH1 | rs7256517 S7   | CYTH2     | 1.04E-15 | 4.24E-08    | 3.06E-12    | 4.82E-12 | 0.000196022 | 1.91E-08 |
| phe.Fasting_rs187000011S11 | DIAPH1 | rs73283603 S7  | ZWINT     | 1.90E-06 | 1.00E+00    | 1.07E-03    | 2.03E-07 | 1           | 2.68E-04 |
| phe.Fasting_rs187000011S11 | DIAPH1 | rs73392640 S8  | POLR3B    | 2.02E-10 | 8.26E-03    | 2.49E-07    | 5.19E-11 | 0.00211214  | 1.67E-07 |
| phe.Fasting_rs187000011S11 | DIAPH1 | rs734069 S19   | NA        | 2.06E-08 | 0.839421    | 1.81E-05    | 6.71E-10 | 0.0272994   | 1.68E-06 |
| phe.Fasting_rs187000011S11 | DIAPH1 | rs73619637 S8  | NA        | 1.44E-15 | 5.89E-08    | 4.14E-12    | 2.05E-10 | 0.00833668  | 5.78E-07 |
| phe.Fasting_rs187000011S11 | DIAPH1 | rs74627895 S8  | TMEM64    | 7.32E-07 | 1           | 0.000459899 | 2.03E-08 | 0.828094    | 3.48E-05 |
| phe.Fasting_rs187000011S11 | DIAPH1 | rs74914207 S24 | NA        | 1.37E-10 | 0.00558626  | 1.73E-07    | 9.12E-11 | 0.0037135   | 2.80E-07 |
| phe.Fasting_rs187000011S11 | DIAPH1 | rs75350765 S5  | RCL1      | 1.82E-16 | 7.42E-09    | 6.37E-13    | 3.70E-08 | 1           | 5.84E-05 |
| phe.Fasting_rs187000011S11 | DIAPH1 | rs75374128 S5  | CNTLN     | 1.47E-16 | 6.01E-09    | 5.72E-13    | 1.01E-07 | 1           | 1.42E-04 |
| phe.Fasting_rs187000011S11 | DIAPH1 | rs75506779 S5  | TMCO3     | 5.55E-07 | 1.00E+00    | 3.61E-04    | 1.10E-08 | 0.449707    | 2.03E-05 |
| phe.Fasting_rs187000011S11 | DIAPH1 | rs75758702 S24 | NA        | 7.02E-17 | 2.87E-09    | 3.16E-13    | 1.57E-10 | 0.00638323  | 4.59E-07 |
| phe.Fasting_rs187000011S11 | DIAPH1 | rs75864203 S8  | CNTLN     | 1.47E-16 | 6.01E-09    | 5.72E-13    | 1.01E-07 | 1           | 1.42E-04 |

|                            |             |             |     |            |          |             |             |          |             |          |
|----------------------------|-------------|-------------|-----|------------|----------|-------------|-------------|----------|-------------|----------|
| phe.Fasting_rs187000011S11 | DIAPH1      | rs75949566  | S5  | TMEM64     | 2.76E-06 | 1           | 0.001473    | 8.48E-11 | 0.00345267  | 2.62E-07 |
| phe.Fasting_rs187000011S11 | DIAPH1      | rs76844308  | S8  | CNTLN      | 7.68E-17 | 3.14E-09    | 3.41E-13    | 9.52E-08 | 1           | 1.35E-04 |
| phe.Fasting_rs187000011S11 | DIAPH1      | rs7763107   | S8  | FARS2      | 5.78E-16 | 2.36E-08    | 1.79E-12    | 9.23E-12 | 0.000375564 | 3.44E-08 |
| phe.Fasting_rs187000011S11 | DIAPH1      | rs77798597  | S7  | KPNA3      | 2.97E-15 | 1.21E-07    | 8.14E-12    | 1.09E-13 | 4.44E-06    | 6.79E-10 |
| phe.Fasting_rs187000011S11 | DIAPH1      | rs77845645  | S21 | NA         | 1.53E-06 | 1           | 0.000888475 | 4.20E-11 | 0.00170882  | 1.38E-07 |
| phe.Fasting_rs187000011S11 | DIAPH1      | rs78353402  | S8  | AP3M2      | 4.51E-15 | 1.84E-07    | 1.18E-11    | 3.87E-07 | 1           | 4.75E-04 |
| phe.Fasting_rs187000011S11 | DIAPH1      | rs78516788  | S8  | SLC38A1    | 2.75E-11 | 0.00112269  | 3.94E-08    | 2.44E-10 | 0.00992686  | 6.74E-07 |
| phe.Fasting_rs187000011S11 | DIAPH1      | rs78697063  | S5  | MSI2       | 8.23E-19 | 3.36E-11    | 2.70E-14    | 6.84E-10 | 0.0278369   | 1.70E-06 |
| phe.Fasting_rs187000011S11 | DIAPH1      | rs78722272  | S5  | CNTLN      | 1.47E-16 | 6.01E-09    | 5.72E-13    | 1.05E-07 | 1           | 1.48E-04 |
| phe.Fasting_rs187000011S11 | DIAPH1      | rs78736524  | S5  | KPNA3      | 2.97E-15 | 1.21E-07    | 8.14E-12    | 1.18E-13 | 4.80E-06    | 7.06E-10 |
| phe.Fasting_rs187000011S11 | DIAPH1      | rs78990344  | S2  | LOC1005063 | 2.37E-06 | 1           | 0.00129547  | 6.78E-11 | 0.00276161  | 2.13E-07 |
| phe.Fasting_rs187000011S11 | DIAPH1      | rs79781495  | S8  | KPNA3      | 2.97E-15 | 1.21E-07    | 8.14E-12    | 1.09E-13 | 4.44E-06    | 6.79E-10 |
| phe.Fasting_rs187000011S11 | DIAPH1      | rs79886603  | S15 | NA         | 8.71E-08 | 1           | 6.74E-05    | 4.66E-07 | 1           | 5.59E-04 |
| phe.Fasting_rs187000011S11 | DIAPH1      | rs80200953  | S8  | PPP2R5D    | 8.49E-17 | 3.47E-09    | 3.69E-13    | 3.65E-09 | 0.148399    | 7.55E-06 |
| phe.Fasting_rs187000011S11 | DIAPH1      | rs80332465  | S5  | KPNA3      | 3.13E-15 | 1.28E-07    | 8.51E-12    | 1.17E-13 | 4.77E-06    | 7.06E-10 |
| phe.Fasting_rs187000011S11 | DIAPH1      | rs80334773  | S5  | KPNA3      | 3.13E-15 | 1.28E-07    | 8.51E-12    | 1.17E-13 | 4.77E-06    | 7.06E-10 |
| phe.Fasting_rs188981295S5  | "RPS27AP10, | rs111576333 | S5  | TMEM64     | 2.37E-06 | 1           | 0.00129547  | 5.87E-14 | 2.39E-06    | 3.99E-10 |
| phe.Fasting_rs188981295S5  | "RPS27AP10, | rs112089881 | S8  | ZFAND4     | 2.04E-17 | 8.32E-10    | 1.43E-13    | 1.09E-09 | 0.0445256   | 2.58E-06 |
| phe.Fasting_rs188981295S5  | "RPS27AP10, | rs112091318 | S5  | TMEM64     | 7.32E-07 | 1           | 4.60E-04    | 3.91E-08 | 1           | 6.13E-05 |
| phe.Fasting_rs188981295S5  | "RPS27AP10, | rs114334325 | S7  | AP3M2      | 4.51E-15 | 1.84E-07    | 1.18E-11    | 3.87E-07 | 1           | 4.75E-04 |
| phe.Fasting_rs188981295S5  | "RPS27AP10, | rs114394395 | S7  | AP3M2      | 4.81E-15 | 1.97E-07    | 1.25E-11    | 3.87E-07 | 1           | 4.75E-04 |
| phe.Fasting_rs188981295S5  | "RPS27AP10, | rs114565620 | S8  | RCL1       | 1.82E-16 | 7.42E-09    | 6.37E-13    | 3.70E-08 | 1           | 5.84E-05 |
| phe.Fasting_rs188981295S5  | "RPS27AP10, | rs115083290 | S19 | NA         | 4.38E-16 | 1.79E-08    | 1.40E-12    | 1.42E-08 | 0.576679    | 2.53E-05 |
| phe.Fasting_rs188981295S5  | "RPS27AP10, | rs11524145  | S5  | CDK6       | 7.80E-07 | 1           | 0.000486356 | 7.89E-06 | 1           | 6.69E-03 |
| phe.Fasting_rs188981295S5  | "RPS27AP10, | rs115752779 | S19 | NA         | 4.38E-16 | 1.79E-08    | 1.40E-12    | 1.42E-08 | 0.576679    | 2.53E-05 |
| phe.Fasting_rs188981295S5  | "RPS27AP10, | rs115787552 | S5  | KPNA3      | 2.97E-15 | 1.21E-07    | 8.14E-12    | 1.18E-13 | 4.80E-06    | 7.06E-10 |
| phe.Fasting_rs188981295S5  | "RPS27AP10, | rs115888477 | S8  | NA         | 2.03E-14 | 8.28E-07    | 5.02E-11    | 2.21E-14 | 8.99E-07    | 1.73E-10 |
| phe.Fasting_rs188981295S5  | "RPS27AP10, | rs116011837 | S9  | BRD2       | 4.89E-11 | 0.00199774  | 6.62E-08    | 4.07E-14 | 1.66E-06    | 2.85E-10 |
| phe.Fasting_rs188981295S5  | "RPS27AP10, | rs116079984 | S8  | KPNA3      | 2.97E-15 | 1.21E-07    | 8.14E-12    | 1.24E-13 | 5.04E-06    | 7.34E-10 |
| phe.Fasting_rs188981295S5  | "RPS27AP10, | rs116120727 | S9  | BRD2       | 4.89E-11 | 0.00199774  | 6.62E-08    | 4.07E-14 | 1.66E-06    | 2.85E-10 |
| phe.Fasting_rs188981295S5  | "RPS27AP10, | rs116406581 | S2  | NA         | 1.81E-14 | 7.39E-07    | 4.52E-11    | 2.35E-07 | 1           | 3.05E-04 |
| phe.Fasting_rs188981295S5  | "RPS27AP10, | rs116548615 | S8  | TMEM45B    | 1.73E-16 | 7.06E-09    | 6.15E-13    | 8.70E-12 | 0.000354153 | 3.26E-08 |
| phe.Fasting_rs188981295S5  | "RPS27AP10, | rs116696844 | S3  | AP3M2      | 6.92E-15 | 2.83E-07    | 1.78E-11    | 3.87E-07 | 1           | 4.75E-04 |
| phe.Fasting_rs188981295S5  | "RPS27AP10, | rs11989304  | S4  | TMEM64     | 2.37E-06 | 1           | 0.00129547  | 6.78E-11 | 0.00276161  | 2.13E-07 |
| phe.Fasting_rs188981295S5  | "RPS27AP10, | rs140524622 | S7  | MRPL10     | 1.08E-16 | 4.41E-09    | 4.54E-13    | 7.35E-06 | 1           | 6.31E-03 |
| phe.Fasting_rs188981295S5  | "RPS27AP10, | rs146815317 | S5  | KPNA3      | 2.97E-15 | 1.21E-07    | 8.14E-12    | 1.18E-13 | 4.80E-06    | 7.06E-10 |
| phe.Fasting_rs188981295S5  | "RPS27AP10, | rs150117838 | S8  | KPNA3      | 2.97E-15 | 1.21E-07    | 8.14E-12    | 1.09E-13 | 4.44E-06    | 6.79E-10 |
| phe.Fasting_rs188981295S5  | "RPS27AP10, | rs150916187 | S4  | HIST1H2BK  | 1.38E-05 | 1           | 0.00605332  | 1.37E-14 | 5.59E-07    | 1.16E-10 |
| phe.Fasting_rs188981295S5  | "RPS27AP10, | rs16894241  | S4  | HIST1H2BK  | 1.99E-11 | 0.000812315 | 2.96E-08    | 3.44E-14 | 1.40E-06    | 2.50E-10 |
| phe.Fasting_rs188981295S5  | "RPS27AP10, | rs2032062   | S8  | NA         | 1.22E-14 | 4.98E-07    | 3.09E-11    | 8.48E-06 | 1           | 7.14E-03 |

|                            |                           |             |          |            |          |          |             |          |
|----------------------------|---------------------------|-------------|----------|------------|----------|----------|-------------|----------|
| phe.Fasting_rs188981295 S5 | "RPS27AP10,rs2153597 S8   | ZNF438      | 5.51E-11 | 2.25E-03   | 7.42E-08 | 4.52E-09 | 0.183916    | 9.08E-06 |
| phe.Fasting_rs188981295 S5 | "RPS27AP10,rs2835656 S7   | TTC3        | 3.01E-10 | 1.23E-02   | 3.60E-07 | 9.12E-06 | 1           | 7.57E-03 |
| phe.Fasting_rs188981295 S5 | "RPS27AP10,rs34801978 S3  | HOXB2       | 1.23E-05 | 1.00E+00   | 5.46E-03 | 1.03E-08 | 0.419057    | 1.90E-05 |
| phe.Fasting_rs188981295 S5 | "RPS27AP10,rs352346 S3    | GRPEL2      | 1.85E-11 | 7.55E-04   | 2.78E-08 | 8.42E-06 | 1           | 7.10E-03 |
| phe.Fasting_rs188981295 S5 | "RPS27AP10,rs3750898 S8   | DCLRE1A     | 2.29E-05 | 1.00E+00   | 9.35E-03 | 8.76E-06 | 1           | 7.32E-03 |
| phe.Fasting_rs188981295 S5 | "RPS27AP10,rs4732511 S13  | POR         | 2.30E-15 | 9.39E-08   | 6.48E-12 | 9.65E-06 | 1           | 7.93E-03 |
| phe.Fasting_rs188981295 S5 | "RPS27AP10,rs57503635 S3  | NA          | 6.34E-16 | 2.59E-08   | 1.95E-12 | 3.17E-14 | 1.29E-06    | 2.34E-10 |
| phe.Fasting_rs188981295 S5 | "RPS27AP10,rs58905476 S7  | TTC3        | 3.29E-10 | 1.34E-02   | 3.90E-07 | 9.79E-06 | 1           | 8.01E-03 |
| phe.Fasting_rs188981295 S5 | "RPS27AP10,rs60011869 S16 | NA          | 1.04E-05 | 1.00E+00   | 4.72E-03 | 8.16E-10 | 0.0332257   | 1.98E-06 |
| phe.Fasting_rs188981295 S5 | "RPS27AP10,rs6964407 S7   | POR         | 7.55E-15 | 3.08E-07   | 1.94E-11 | 8.91E-06 | 1           | 7.43E-03 |
| phe.Fasting_rs188981295 S5 | "RPS27AP10,rs7004597 S8   | NA          | 4.51E-15 | 1.84E-07   | 1.18E-11 | 2.34E-07 | 1           | 3.04E-04 |
| phe.Fasting_rs188981295 S5 | "RPS27AP10,rs7256517 S7   | CYTH2       | 1.04E-15 | 4.24E-08   | 3.06E-12 | 4.82E-12 | 0.000196022 | 1.91E-08 |
| phe.Fasting_rs188981295 S5 | "RPS27AP10,rs73283603 S7  | ZWINT       | 1.90E-06 | 1          | 1.07E-03 | 2.03E-07 | 1           | 2.68E-04 |
| phe.Fasting_rs188981295 S5 | "RPS27AP10,rs73392640 S8  | POLR3B      | 2.02E-10 | 0.00826001 | 2.49E-07 | 5.19E-11 | 0.00211214  | 1.67E-07 |
| phe.Fasting_rs188981295 S5 | "RPS27AP10,rs734069 S19   | NA          | 2.06E-08 | 0.839421   | 1.81E-05 | 6.71E-10 | 0.0272994   | 1.68E-06 |
| phe.Fasting_rs188981295 S5 | "RPS27AP10,rs73619637 S8  | NA          | 1.44E-15 | 5.89E-08   | 4.14E-12 | 2.05E-10 | 0.00833668  | 5.78E-07 |
| phe.Fasting_rs188981295 S5 | "RPS27AP10,rs74627895 S8  | TMEM64      | 7.32E-07 | 1          | 4.60E-04 | 2.03E-08 | 0.828094    | 3.48E-05 |
| phe.Fasting_rs188981295 S5 | "RPS27AP10,rs74914207 S24 | NA          | 1.37E-10 | 0.00558626 | 1.73E-07 | 9.12E-11 | 0.0037135   | 2.80E-07 |
| phe.Fasting_rs188981295 S5 | "RPS27AP10,rs75350765 S5  | RCL1        | 1.82E-16 | 7.42E-09   | 6.37E-13 | 3.70E-08 | 1           | 5.84E-05 |
| phe.Fasting_rs188981295 S5 | "RPS27AP10,rs75374128 S5  | CNTLN       | 1.47E-16 | 6.01E-09   | 5.72E-13 | 1.01E-07 | 1           | 1.42E-04 |
| phe.Fasting_rs188981295 S5 | "RPS27AP10,rs75506779 S5  | TMCO3       | 5.55E-07 | 1          | 3.61E-04 | 1.10E-08 | 0.449707    | 2.03E-05 |
| phe.Fasting_rs188981295 S5 | "RPS27AP10,rs75758702 S24 | NA          | 7.02E-17 | 2.87E-09   | 3.16E-13 | 1.57E-10 | 0.00638323  | 4.59E-07 |
| phe.Fasting_rs188981295 S5 | "RPS27AP10,rs75864203 S8  | CNTLN       | 1.47E-16 | 6.01E-09   | 5.72E-13 | 1.01E-07 | 1           | 1.42E-04 |
| phe.Fasting_rs188981295 S5 | "RPS27AP10,rs75949566 S5  | TMEM64      | 2.76E-06 | 1.00E+00   | 1.47E-03 | 8.48E-11 | 0.00345267  | 2.62E-07 |
| phe.Fasting_rs188981295 S5 | "RPS27AP10,rs76844308 S8  | CNTLN       | 7.68E-17 | 3.14E-09   | 3.41E-13 | 9.52E-08 | 1           | 1.35E-04 |
| phe.Fasting_rs188981295 S5 | "RPS27AP10,rs7763107 S8   | FARS2       | 5.78E-16 | 2.36E-08   | 1.79E-12 | 9.23E-12 | 0.000375564 | 3.44E-08 |
| phe.Fasting_rs188981295 S5 | "RPS27AP10,rs77798597 S7  | KPNA3       | 2.97E-15 | 1.21E-07   | 8.14E-12 | 1.09E-13 | 4.44E-06    | 6.79E-10 |
| phe.Fasting_rs188981295 S5 | "RPS27AP10,rs77845645 S21 | NA          | 1.53E-06 | 1.00E+00   | 8.88E-04 | 4.20E-11 | 0.00170882  | 1.38E-07 |
| phe.Fasting_rs188981295 S5 | "RPS27AP10,rs78353402 S8  | AP3M2       | 4.51E-15 | 1.84E-07   | 1.18E-11 | 3.87E-07 | 1           | 4.75E-04 |
| phe.Fasting_rs188981295 S5 | "RPS27AP10,rs78516788 S8  | SLC38A1     | 2.75E-11 | 1.12E-03   | 3.94E-08 | 2.44E-10 | 0.00992686  | 6.74E-07 |
| phe.Fasting_rs188981295 S5 | "RPS27AP10,rs78697063 S5  | MSI2        | 8.23E-19 | 3.36E-11   | 2.70E-14 | 6.84E-10 | 0.0278369   | 1.70E-06 |
| phe.Fasting_rs188981295 S5 | "RPS27AP10,rs78722272 S5  | CNTLN       | 1.47E-16 | 6.01E-09   | 5.72E-13 | 1.05E-07 | 1           | 1.48E-04 |
| phe.Fasting_rs188981295 S5 | "RPS27AP10,rs78736524 S5  | KPNA3       | 2.97E-15 | 1.21E-07   | 8.14E-12 | 1.18E-13 | 4.80E-06    | 7.06E-10 |
| phe.Fasting_rs188981295 S5 | "RPS27AP10,rs78990344 S2  | LOC10050631 | 2.37E-06 | 1.00E+00   | 1.30E-03 | 6.78E-11 | 0.00276161  | 2.13E-07 |
| phe.Fasting_rs188981295 S5 | "RPS27AP10,rs79781495 S8  | KPNA3       | 2.97E-15 | 1.21E-07   | 8.14E-12 | 1.09E-13 | 4.44E-06    | 6.79E-10 |
| phe.Fasting_rs188981295 S5 | "RPS27AP10,rs79886603 S15 | NA          | 8.71E-08 | 1.00E+00   | 6.74E-05 | 4.66E-07 | 1           | 5.59E-04 |
| phe.Fasting_rs188981295 S5 | "RPS27AP10,rs80200953 S5  | PPP2R5D     | 8.49E-17 | 3.47E-09   | 3.69E-13 | 3.65E-09 | 0.148399    | 7.55E-06 |
| phe.Fasting_rs188981295 S5 | "RPS27AP10,rs80332465 S8  | KPNA3       | 3.13E-15 | 1.28E-07   | 8.51E-12 | 1.17E-13 | 4.77E-06    | 7.06E-10 |
| phe.Fasting_rs188981295 S5 | "RPS27AP10,rs80334773 S5  | KPNA3       | 3.13E-15 | 1.28E-07   | 8.51E-12 | 1.17E-13 | 4.77E-06    | 7.06E-10 |
| phe.Fasting_rs190559574 S7 | DIAPH1 rs111576333 S5     | TMEM64      | 5.56E-07 | 1.00E+00   | 3.61E-04 | 7.80E-15 | 3.17E-07    | 6.90E-11 |

|                            |        |                 |           |          |             |             |          |             |          |
|----------------------------|--------|-----------------|-----------|----------|-------------|-------------|----------|-------------|----------|
| phe.Fasting_rs190559574 S7 | DIAPH1 | rs112089881 S8  | ZFAND4    | 3.24E-18 | 1.32E-10    | 5.45E-14    | 1.95E-10 | 0.00795558  | 5.56E-07 |
| phe.Fasting_rs190559574 S7 | DIAPH1 | rs112091318 S5  | TMEM64    | 1.64E-07 | 1.00E+00    | 1.18E-04    | 9.13E-09 | 0.371559    | 1.72E-05 |
| phe.Fasting_rs190559574 S7 | DIAPH1 | rs114334325 S7  | AP3M2     | 1.25E-15 | 5.12E-08    | 3.65E-12    | 8.81E-08 | 1           | 1.26E-04 |
| phe.Fasting_rs190559574 S7 | DIAPH1 | rs114394395 S7  | AP3M2     | 1.33E-15 | 5.44E-08    | 3.85E-12    | 8.81E-08 | 1           | 1.26E-04 |
| phe.Fasting_rs190559574 S7 | DIAPH1 | rs114565620 S8  | RCL1      | 2.03E-17 | 8.30E-10    | 1.43E-13    | 8.23E-09 | 0.335069    | 1.57E-05 |
| phe.Fasting_rs190559574 S7 | DIAPH1 | rs115083290 S19 | NA        | 8.17E-17 | 3.34E-09    | 3.58E-13    | 2.77E-09 | 0.11274     | 5.90E-06 |
| phe.Fasting_rs190559574 S7 | DIAPH1 | rs115752779 S19 | NA        | 8.17E-17 | 3.34E-09    | 3.58E-13    | 2.77E-09 | 0.11274     | 5.90E-06 |
| phe.Fasting_rs190559574 S7 | DIAPH1 | rs115787552 S5  | KPNA3     | 5.05E-16 | 2.06E-08    | 1.59E-12    | 2.34E-14 | 9.53E-07    | 1.79E-10 |
| phe.Fasting_rs190559574 S7 | DIAPH1 | rs115888477 S8  | NA        | 3.68E-15 | 1.50E-07    | 9.90E-12    | 4.11E-15 | 1.67E-07    | 3.84E-11 |
| phe.Fasting_rs190559574 S7 | DIAPH1 | rs116011837 S9  | BRD2      | 9.60E-12 | 0.000392176 | 1.53E-08    | 9.05E-15 | 3.68E-07    | 7.90E-11 |
| phe.Fasting_rs190559574 S7 | DIAPH1 | rs116079984 S8  | KPNA3     | 5.05E-16 | 2.06E-08    | 1.59E-12    | 2.56E-14 | 1.04E-06    | 1.94E-10 |
| phe.Fasting_rs190559574 S7 | DIAPH1 | rs116120727 S9  | BRD2      | 9.60E-12 | 0.000392176 | 1.53E-08    | 9.05E-15 | 3.68E-07    | 7.90E-11 |
| phe.Fasting_rs190559574 S7 | DIAPH1 | rs116406581 S2  | NA        | 5.24E-15 | 2.14E-07    | 1.36E-11    | 5.32E-08 | 1           | 8.11E-05 |
| phe.Fasting_rs190559574 S7 | DIAPH1 | rs116548615 S8  | TMEM45B   | 2.95E-17 | 1.21E-09    | 1.69E-13    | 1.76E-12 | 7.17E-05    | 7.72E-09 |
| phe.Fasting_rs190559574 S7 | DIAPH1 | rs116696844 S3  | AP3M2     | 1.90E-15 | 7.75E-08    | 5.41E-12    | 8.81E-08 | 1           | 1.26E-04 |
| phe.Fasting_rs190559574 S7 | DIAPH1 | rs11989304 S4   | TMEM64    | 5.56E-07 | 1           | 3.61E-04    | 1.11E-11 | 0.000453381 | 4.10E-08 |
| phe.Fasting_rs190559574 S7 | DIAPH1 | rs140524622 S7  | MRPL10    | 1.81E-17 | 7.37E-10    | 1.32E-13    | 2.83E-06 | 1           | 2.79E-03 |
| phe.Fasting_rs190559574 S7 | DIAPH1 | rs146815317 S5  | KPNA3     | 5.05E-16 | 2.06E-08    | 1.59E-12    | 2.34E-14 | 9.53E-07    | 1.79E-10 |
| phe.Fasting_rs190559574 S7 | DIAPH1 | rs150117838 S8  | KPNA3     | 5.05E-16 | 2.06E-08    | 1.59E-12    | 2.16E-14 | 8.80E-07    | 1.71E-10 |
| phe.Fasting_rs190559574 S7 | DIAPH1 | rs150916187 S4  | HIST1H2BK | 4.14E-06 | 1           | 2.11E-03    | 2.61E-15 | 1.06E-07    | 2.55E-11 |
| phe.Fasting_rs190559574 S7 | DIAPH1 | rs16894241 S4   | HIST1H2BK | 3.73E-12 | 0.000152384 | 6.73E-09    | 6.62E-15 | 2.69E-07    | 5.94E-11 |
| phe.Fasting_rs190559574 S7 | DIAPH1 | rs34801978 S3   | HOXB2     | 2.19E-06 | 1           | 1.21E-03    | 1.65E-09 | 0.0670533   | 3.72E-06 |
| phe.Fasting_rs190559574 S7 | DIAPH1 | rs4732511 S13   | POR       | 9.61E-15 | 3.93E-07    | 2.45E-11    | 2.36E-06 | 1           | 2.39E-03 |
| phe.Fasting_rs190559574 S7 | DIAPH1 | rs57503635 S3   | NA        | 1.28E-16 | 5.23E-09    | 5.19E-13    | 6.61E-15 | 2.69E-07    | 5.94E-11 |
| phe.Fasting_rs190559574 S7 | DIAPH1 | rs60011869 S16  | NA        | 2.13E-06 | 1           | 1.18E-03    | 1.78E-07 | 1           | 2.39E-04 |
| phe.Fasting_rs190559574 S7 | DIAPH1 | rs6964407 S7    | POR       | 3.32E-14 | 1.36E-06    | 8.04E-11    | 2.16E-06 | 1           | 2.22E-03 |
| phe.Fasting_rs190559574 S7 | DIAPH1 | rs7004597 S8    | NA        | 1.25E-15 | 5.12E-08    | 3.65E-12    | 5.12E-08 | 1           | 7.84E-05 |
| phe.Fasting_rs190559574 S7 | DIAPH1 | rs7256517 S7    | CYTH2     | 1.59E-16 | 6.48E-09    | 6.03E-13    | 9.69E-13 | 3.95E-05    | 4.59E-09 |
| phe.Fasting_rs190559574 S7 | DIAPH1 | rs73283603 S7   | ZWINT     | 4.49E-07 | 1           | 0.000297012 | 4.53E-08 | 1           | 7.02E-05 |
| phe.Fasting_rs190559574 S7 | DIAPH1 | rs73392640 S8   | POLR3B    | 4.58E-11 | 0.00187102  | 6.24E-08    | 6.82E-12 | 0.000277641 | 2.62E-08 |
| phe.Fasting_rs190559574 S7 | DIAPH1 | rs73619637 S8   | NA        | 2.00E-16 | 8.15E-09    | 6.95E-13    | 6.35E-08 | 1           | 9.54E-05 |
| phe.Fasting_rs190559574 S7 | DIAPH1 | rs74627895 S8   | TMEM64    | 1.64E-07 | 1.00E+00    | 1.18E-04    | 4.42E-09 | 0.179944    | 8.98E-06 |
| phe.Fasting_rs190559574 S7 | DIAPH1 | rs74914207 S24  | NA        | 2.89E-11 | 0.00117833  | 4.13E-08    | 1.56E-11 | 0.000634366 | 5.60E-08 |
| phe.Fasting_rs190559574 S7 | DIAPH1 | rs75350765 S5   | RCL1      | 2.03E-17 | 8.30E-10    | 1.43E-13    | 8.23E-09 | 0.335069    | 1.57E-05 |
| phe.Fasting_rs190559574 S7 | DIAPH1 | rs75374128 S5   | CNTLN     | 5.25E-06 | 1           | 2.60E-03    | 1.83E-08 | 0.746586    | 3.18E-05 |
| phe.Fasting_rs190559574 S7 | DIAPH1 | rs75506779 S5   | TMCO3     | 1.04E-07 | 1           | 7.88E-05    | 2.32E-09 | 0.0942949   | 5.04E-06 |
| phe.Fasting_rs190559574 S7 | DIAPH1 | rs75758702 S24  | NA        | 1.04E-17 | 4.25E-10    | 9.89E-14    | 2.85E-11 | 0.00115844  | 9.77E-08 |
| phe.Fasting_rs190559574 S7 | DIAPH1 | rs75864203 S8   | CNTLN     | 5.25E-06 | 1           | 2.60E-03    | 1.83E-08 | 0.746586    | 3.18E-05 |
| phe.Fasting_rs190559574 S7 | DIAPH1 | rs75949566 S5   | TMEM64    | 6.52E-07 | 1           | 4.16E-04    | 1.49E-11 | 0.000607747 | 5.38E-08 |
| phe.Fasting_rs190559574 S7 | DIAPH1 | rs76844308 S8   | CNTLN     | 2.67E-06 | 1           | 1.44E-03    | 1.80E-08 | 0.73432     | 3.14E-05 |

|                           |        |                |     |            |          |             |            |          |             |          |
|---------------------------|--------|----------------|-----|------------|----------|-------------|------------|----------|-------------|----------|
| phe.Fasting_rs190559574S7 | DIAPH1 | rs7763107      | S8  | FARS2      | 9.44E-17 | 3.86E-09    | 4.06E-13   | 1.60E-12 | 6.52E-05    | 7.13E-09 |
| phe.Fasting_rs190559574S7 | DIAPH1 | rs77798597     | S7  | KPNA3      | 5.05E-16 | 2.06E-08    | 1.59E-12   | 2.16E-14 | 8.80E-07    | 1.71E-10 |
| phe.Fasting_rs190559574S7 | DIAPH1 | rs77845645     | S21 | NA         | 3.35E-07 | 1           | 2.29E-04   | 1.04E-11 | 0.000424266 | 3.85E-08 |
| phe.Fasting_rs190559574S7 | DIAPH1 | rs78353402     | S8  | AP3M2      | 1.25E-15 | 5.12E-08    | 3.65E-12   | 8.81E-08 | 1           | 1.26E-04 |
| phe.Fasting_rs190559574S7 | DIAPH1 | rs78516788     | S8  | SLC38A1    | 1.24E-06 | 1           | 7.38E-04   | 2.76E-09 | 0.112313    | 5.89E-06 |
| phe.Fasting_rs190559574S7 | DIAPH1 | rs78697063     | S5  | MSI2       | 7.77E-20 | 3.17E-12    | 2.23E-14   | 1.45E-10 | 0.00591847  | 4.35E-07 |
| phe.Fasting_rs190559574S7 | DIAPH1 | rs78703708     | S7  | FAF2       | 7.40E-12 | 0.000302252 | 1.27E-08   | 7.08E-06 | 1           | 6.12E-03 |
| phe.Fasting_rs190559574S7 | DIAPH1 | rs78722272     | S5  | CNTLN      | 5.25E-06 | 1           | 2.60E-03   | 1.89E-08 | 0.767323    | 3.26E-05 |
| phe.Fasting_rs190559574S7 | DIAPH1 | rs78736524     | S5  | KPNA3      | 5.05E-16 | 2.06E-08    | 1.59E-12   | 2.34E-14 | 9.53E-07    | 1.79E-10 |
| phe.Fasting_rs190559574S7 | DIAPH1 | rs78990344     | S2  | LOC1005063 | 5.56E-07 | 1           | 3.61E-04   | 1.11E-11 | 0.000453381 | 4.10E-08 |
| phe.Fasting_rs190559574S7 | DIAPH1 | rs79781495     | S8  | KPNA3      | 5.05E-16 | 2.06E-08    | 1.59E-12   | 2.16E-14 | 8.80E-07    | 1.71E-10 |
| phe.Fasting_rs190559574S7 | DIAPH1 | rs80200953     | S8  | PPP2R5D    | 1.41E-17 | 5.76E-10    | 1.14E-13   | 8.37E-10 | 0.034062    | 2.03E-06 |
| phe.Fasting_rs190559574S7 | DIAPH1 | rs80332465     | S5  | KPNA3      | 5.36E-16 | 2.19E-08    | 1.67E-12   | 2.32E-14 | 9.45E-07    | 1.79E-10 |
| phe.Fasting_rs190559574S7 | DIAPH1 | rs80334773     | S5  | KPNA3      | 5.36E-16 | 2.19E-08    | 1.67E-12   | 2.32E-14 | 9.45E-07    | 1.79E-10 |
| phe.Fasting_rs190559574S7 | DIAPH1 | rs891061       | S7  | POP4       | 6.59E-07 | 1           | 4.20E-04   | 1.19E-05 | 1           | 9.35E-03 |
| phe.Fasting_rs190827395S5 | E2F7   | rs115305957S23 |     | NA         | 9.90E-14 | 4.04E-06    | 2.25E-10   | 4.30E-07 | 1           | 5.21E-04 |
| phe.Fasting_rs190827395S5 | E2F7   | rs73392640     | S8  | POLR3B     | 4.08E-06 | 1           | 2.08E-03   | 2.72E-06 | 1           | 2.68E-03 |
| phe.Fasting_rs190827395S5 | E2F7   | rs74701059     | S24 | C17orf102  | 8.11E-14 | 3.31E-06    | 1.86E-10   | 6.15E-07 | 1           | 7.24E-04 |
| phe.Fasting_rs190827395S5 | E2F7   | rs79703349     | S24 | C17orf102  | 8.11E-14 | 3.31E-06    | 1.86E-10   | 7.42E-07 | 1           | 8.60E-04 |
| phe.Fasting_rs191544043S8 | DIAPH1 | rs111576333S5  |     | TMEM64     | 2.37E-06 | 1           | 1.30E-03   | 5.87E-14 | 2.39E-06    | 3.99E-10 |
| phe.Fasting_rs191544043S8 | DIAPH1 | rs112089881S8  |     | ZFAND4     | 2.04E-17 | 8.32E-10    | 1.43E-13   | 1.09E-09 | 0.0445256   | 2.58E-06 |
| phe.Fasting_rs191544043S8 | DIAPH1 | rs112091318S5  |     | TMEM64     | 7.32E-07 | 1           | 4.60E-04   | 3.91E-08 | 1           | 6.13E-05 |
| phe.Fasting_rs191544043S8 | DIAPH1 | rs114334325S7  |     | AP3M2      | 4.51E-15 | 1.84E-07    | 1.18E-11   | 3.87E-07 | 1           | 4.75E-04 |
| phe.Fasting_rs191544043S8 | DIAPH1 | rs114394395S7  |     | AP3M2      | 4.81E-15 | 1.97E-07    | 1.25E-11   | 3.87E-07 | 1           | 4.75E-04 |
| phe.Fasting_rs191544043S8 | DIAPH1 | rs114565620S8  |     | RCL1       | 1.82E-16 | 7.42E-09    | 6.37E-13   | 3.70E-08 | 1           | 5.84E-05 |
| phe.Fasting_rs191544043S8 | DIAPH1 | rs115083290S19 |     | NA         | 4.38E-16 | 1.79E-08    | 1.40E-12   | 1.42E-08 | 0.576679    | 2.53E-05 |
| phe.Fasting_rs191544043S8 | DIAPH1 | rs11524145     | S5  | CDK6       | 7.80E-07 | 1           | 4.86E-04   | 7.89E-06 | 1           | 6.69E-03 |
| phe.Fasting_rs191544043S8 | DIAPH1 | rs115752779S19 |     | NA         | 4.38E-16 | 1.79E-08    | 1.40E-12   | 1.42E-08 | 0.576679    | 2.53E-05 |
| phe.Fasting_rs191544043S8 | DIAPH1 | rs115787552S5  |     | KPNA3      | 2.97E-15 | 1.21E-07    | 8.14E-12   | 1.18E-13 | 4.80E-06    | 7.06E-10 |
| phe.Fasting_rs191544043S8 | DIAPH1 | rs115888477S8  |     | NA         | 2.03E-14 | 8.28E-07    | 5.02E-11   | 2.21E-14 | 8.99E-07    | 1.73E-10 |
| phe.Fasting_rs191544043S8 | DIAPH1 | rs116011837S9  |     | BRD2       | 4.89E-11 | 0.00199774  | 6.62E-08   | 4.07E-14 | 1.66E-06    | 2.85E-10 |
| phe.Fasting_rs191544043S8 | DIAPH1 | rs116079984S8  |     | KPNA3      | 2.97E-15 | 1.21E-07    | 8.14E-12   | 1.24E-13 | 5.04E-06    | 7.34E-10 |
| phe.Fasting_rs191544043S8 | DIAPH1 | rs116120727S9  |     | BRD2       | 4.89E-11 | 0.00199774  | 6.62E-08   | 4.07E-14 | 1.66E-06    | 2.85E-10 |
| phe.Fasting_rs191544043S8 | DIAPH1 | rs116406581S2  |     | NA         | 1.81E-14 | 7.39E-07    | 4.52E-11   | 2.35E-07 | 1           | 3.05E-04 |
| phe.Fasting_rs191544043S8 | DIAPH1 | rs116548615S8  |     | TMEM45B    | 1.73E-16 | 7.06E-09    | 6.15E-13   | 8.70E-12 | 0.000354153 | 3.26E-08 |
| phe.Fasting_rs191544043S8 | DIAPH1 | rs116696844S3  |     | AP3M2      | 6.92E-15 | 2.83E-07    | 1.78E-11   | 3.87E-07 | 1           | 4.75E-04 |
| phe.Fasting_rs191544043S8 | DIAPH1 | rs11989304     | S4  | TMEM64     | 2.37E-06 | 1           | 0.00129547 | 6.78E-11 | 0.00276161  | 2.13E-07 |
| phe.Fasting_rs191544043S8 | DIAPH1 | rs140524622S7  |     | MRPL10     | 1.08E-16 | 4.41E-09    | 4.54E-13   | 7.35E-06 | 1           | 6.31E-03 |
| phe.Fasting_rs191544043S8 | DIAPH1 | rs146815317S5  |     | KPNA3      | 2.97E-15 | 1.21E-07    | 8.14E-12   | 1.18E-13 | 4.80E-06    | 7.06E-10 |
| phe.Fasting_rs191544043S8 | DIAPH1 | rs150117838S8  |     | KPNA3      | 2.97E-15 | 1.21E-07    | 8.14E-12   | 1.09E-13 | 4.44E-06    | 6.79E-10 |



|                            |        |                |             |          |           |            |          |             |          |
|----------------------------|--------|----------------|-------------|----------|-----------|------------|----------|-------------|----------|
| phe.Fasting_rs191544043 S8 | DIAPH1 | rs150916187 S4 | HIST1H2BK   | 1.38E-05 | 1.00E+00  | 6.05E-03   | 1.37E-14 | 5.59E-07    | 1.16E-10 |
| phe.Fasting_rs191544043 S8 | DIAPH1 | rs16894241 S4  | HIST1H2BK   | 1.99E-11 | 8.12E-04  | 2.96E-08   | 3.44E-14 | 1.40E-06    | 2.50E-10 |
| phe.Fasting_rs191544043 S8 | DIAPH1 | rs2032062 S8   | NA          | 1.22E-14 | 4.98E-07  | 3.09E-11   | 8.48E-06 | 1           | 7.14E-03 |
| phe.Fasting_rs191544043 S8 | DIAPH1 | rs2153597 S8   | ZNF438      | 5.51E-11 | 2.25E-03  | 7.42E-08   | 4.52E-09 | 0.183916    | 9.08E-06 |
| phe.Fasting_rs191544043 S8 | DIAPH1 | rs2835656 S7   | TTC3        | 3.01E-10 | 0.0122766 | 3.60E-07   | 9.12E-06 | 1           | 7.57E-03 |
| phe.Fasting_rs191544043 S8 | DIAPH1 | rs34801978 S3  | HOXB2       | 1.23E-05 | 1         | 0.00545724 | 1.03E-08 | 0.419057    | 1.90E-05 |
| phe.Fasting_rs191544043 S8 | DIAPH1 | rs352346 S3    | GRPEL2      | 1.85E-11 | 7.55E-04  | 2.78E-08   | 8.42E-06 | 1           | 7.10E-03 |
| phe.Fasting_rs191544043 S8 | DIAPH1 | rs3750898 S8   | DCLRE1A     | 2.29E-05 | 1         | 9.35E-03   | 8.76E-06 | 1           | 7.32E-03 |
| phe.Fasting_rs191544043 S8 | DIAPH1 | rs4732511 S13  | POR         | 2.30E-15 | 9.39E-08  | 6.48E-12   | 9.65E-06 | 1           | 7.93E-03 |
| phe.Fasting_rs191544043 S8 | DIAPH1 | rs57503635 S3  | NA          | 6.34E-16 | 2.59E-08  | 1.95E-12   | 3.17E-14 | 1.29E-06    | 2.34E-10 |
| phe.Fasting_rs191544043 S8 | DIAPH1 | rs58905476 S7  | TTC3        | 3.29E-10 | 1.34E-02  | 3.90E-07   | 9.79E-06 | 1           | 8.01E-03 |
| phe.Fasting_rs191544043 S8 | DIAPH1 | rs60011869 S16 | NA          | 1.04E-05 | 1.00E+00  | 4.72E-03   | 8.16E-10 | 0.0332257   | 1.98E-06 |
| phe.Fasting_rs191544043 S8 | DIAPH1 | rs6964407 S7   | POR         | 7.55E-15 | 3.08E-07  | 1.94E-11   | 8.91E-06 | 1           | 7.43E-03 |
| phe.Fasting_rs191544043 S8 | DIAPH1 | rs7004597 S8   | NA          | 4.51E-15 | 1.84E-07  | 1.18E-11   | 2.34E-07 | 1           | 3.04E-04 |
| phe.Fasting_rs191544043 S8 | DIAPH1 | rs7256517 S7   | CYTH2       | 1.04E-15 | 4.24E-08  | 3.06E-12   | 4.82E-12 | 0.000196022 | 1.91E-08 |
| phe.Fasting_rs191544043 S8 | DIAPH1 | rs73283603 S7  | ZWINT       | 1.90E-06 | 1.00E+00  | 1.07E-03   | 2.03E-07 | 1           | 2.68E-04 |
| phe.Fasting_rs191544043 S8 | DIAPH1 | rs73392640 S8  | POLR3B      | 2.02E-10 | 8.26E-03  | 2.49E-07   | 5.19E-11 | 0.00211214  | 1.67E-07 |
| phe.Fasting_rs191544043 S8 | DIAPH1 | rs734069 S19   | NA          | 2.06E-08 | 8.39E-01  | 1.81E-05   | 6.71E-10 | 0.0272994   | 1.68E-06 |
| phe.Fasting_rs191544043 S8 | DIAPH1 | rs73619637 S8  | NA          | 1.44E-15 | 5.89E-08  | 4.14E-12   | 2.05E-10 | 0.00833668  | 5.78E-07 |
| phe.Fasting_rs191544043 S8 | DIAPH1 | rs74627895 S8  | TMEM64      | 7.32E-07 | 1.00E+00  | 4.60E-04   | 2.03E-08 | 0.828094    | 3.48E-05 |
| phe.Fasting_rs191544043 S8 | DIAPH1 | rs74914207 S24 | NA          | 1.37E-10 | 5.59E-03  | 1.73E-07   | 9.12E-11 | 0.0037135   | 2.80E-07 |
| phe.Fasting_rs191544043 S8 | DIAPH1 | rs75350765 S5  | RCL1        | 1.82E-16 | 7.42E-09  | 6.37E-13   | 3.70E-08 | 1           | 5.84E-05 |
| phe.Fasting_rs191544043 S8 | DIAPH1 | rs75374128 S5  | CNTLN       | 1.47E-16 | 6.01E-09  | 5.72E-13   | 1.01E-07 | 1           | 1.42E-04 |
| phe.Fasting_rs191544043 S8 | DIAPH1 | rs75506779 S5  | TMCO3       | 5.55E-07 | 1.00E+00  | 3.61E-04   | 1.10E-08 | 0.449707    | 2.03E-05 |
| phe.Fasting_rs191544043 S8 | DIAPH1 | rs75758702 S24 | NA          | 7.02E-17 | 2.87E-09  | 3.16E-13   | 1.57E-10 | 0.00638323  | 4.59E-07 |
| phe.Fasting_rs191544043 S8 | DIAPH1 | rs75864203 S8  | CNTLN       | 1.47E-16 | 6.01E-09  | 5.72E-13   | 1.01E-07 | 1           | 1.42E-04 |
| phe.Fasting_rs191544043 S8 | DIAPH1 | rs75949566 S5  | TMEM64      | 2.76E-06 | 1.00E+00  | 1.47E-03   | 8.48E-11 | 0.00345267  | 2.62E-07 |
| phe.Fasting_rs191544043 S8 | DIAPH1 | rs76844308 S8  | CNTLN       | 7.68E-17 | 3.14E-09  | 3.41E-13   | 9.52E-08 | 1           | 1.35E-04 |
| phe.Fasting_rs191544043 S8 | DIAPH1 | rs7763107 S8   | FARS2       | 5.78E-16 | 2.36E-08  | 1.79E-12   | 9.23E-12 | 0.000375564 | 3.44E-08 |
| phe.Fasting_rs191544043 S8 | DIAPH1 | rs77798597 S7  | KPNA3       | 2.97E-15 | 1.21E-07  | 8.14E-12   | 1.09E-13 | 4.44E-06    | 6.79E-10 |
| phe.Fasting_rs191544043 S8 | DIAPH1 | rs77845645 S21 | NA          | 1.53E-06 | 1.00E+00  | 8.88E-04   | 4.20E-11 | 0.00170882  | 1.38E-07 |
| phe.Fasting_rs191544043 S8 | DIAPH1 | rs78353402 S8  | AP3M2       | 4.51E-15 | 1.84E-07  | 1.18E-11   | 3.87E-07 | 1           | 4.75E-04 |
| phe.Fasting_rs191544043 S8 | DIAPH1 | rs78516788 S8  | SLC38A1     | 2.75E-11 | 1.12E-03  | 3.94E-08   | 2.44E-10 | 0.00992686  | 6.74E-07 |
| phe.Fasting_rs191544043 S8 | DIAPH1 | rs78697063 S5  | MSI2        | 8.23E-19 | 3.36E-11  | 2.70E-14   | 6.84E-10 | 0.0278369   | 1.70E-06 |
| phe.Fasting_rs191544043 S8 | DIAPH1 | rs78722272 S5  | CNTLN       | 1.47E-16 | 6.01E-09  | 5.72E-13   | 1.05E-07 | 1           | 1.48E-04 |
| phe.Fasting_rs191544043 S8 | DIAPH1 | rs78736524 S5  | KPNA3       | 2.97E-15 | 1.21E-07  | 8.14E-12   | 1.18E-13 | 4.80E-06    | 7.06E-10 |
| phe.Fasting_rs191544043 S8 | DIAPH1 | rs78990344 S2  | LOC10050631 | 2.37E-06 | 1.00E+00  | 1.30E-03   | 6.78E-11 | 0.00276161  | 2.13E-07 |
| phe.Fasting_rs191544043 S8 | DIAPH1 | rs79781495 S8  | KPNA3       | 2.97E-15 | 1.21E-07  | 8.14E-12   | 1.09E-13 | 4.44E-06    | 6.79E-10 |
| phe.Fasting_rs191544043 S8 | DIAPH1 | rs79886603 S15 | NA          | 8.71E-08 | 1.00E+00  | 6.74E-05   | 4.66E-07 | 1           | 5.59E-04 |
| phe.Fasting_rs191544043 S8 | DIAPH1 | rs80200953 S8  | PPP2R5D     | 8.49E-17 | 3.47E-09  | 3.69E-13   | 3.65E-09 | 0.148399    | 7.55E-06 |

|                            |        |                 |           |          |             |          |          |             |          |
|----------------------------|--------|-----------------|-----------|----------|-------------|----------|----------|-------------|----------|
| phe.Fasting_rs191544043 S8 | DIAPH1 | rs80332465 S5   | KPNA3     | 3.13E-15 | 1.28E-07    | 8.51E-12 | 1.17E-13 | 4.77E-06    | 7.06E-10 |
| phe.Fasting_rs191544043 S8 | DIAPH1 | rs80334773 S5   | KPNA3     | 3.13E-15 | 1.28E-07    | 8.51E-12 | 1.17E-13 | 4.77E-06    | 7.06E-10 |
| phe.Fasting_rs191766712 S7 | DIAPH1 | rs111576333 S5  | TMEM64    | 2.37E-06 | 1.00E+00    | 1.30E-03 | 5.87E-14 | 2.39E-06    | 3.99E-10 |
| phe.Fasting_rs191766712 S7 | DIAPH1 | rs112089881 S8  | ZFAND4    | 2.04E-17 | 8.32E-10    | 1.43E-13 | 1.09E-09 | 0.0445256   | 2.58E-06 |
| phe.Fasting_rs191766712 S7 | DIAPH1 | rs112091318 S5  | TMEM64    | 7.32E-07 | 1.00E+00    | 4.60E-04 | 3.91E-08 | 1           | 6.13E-05 |
| phe.Fasting_rs191766712 S7 | DIAPH1 | rs114334325 S7  | AP3M2     | 4.51E-15 | 1.84E-07    | 1.18E-11 | 3.87E-07 | 1           | 4.75E-04 |
| phe.Fasting_rs191766712 S7 | DIAPH1 | rs114394395 S7  | AP3M2     | 4.81E-15 | 1.97E-07    | 1.25E-11 | 3.87E-07 | 1           | 4.75E-04 |
| phe.Fasting_rs191766712 S7 | DIAPH1 | rs114565620 S8  | RCL1      | 1.82E-16 | 7.42E-09    | 6.37E-13 | 3.70E-08 | 1           | 5.84E-05 |
| phe.Fasting_rs191766712 S7 | DIAPH1 | rs115083290 S19 | NA        | 4.38E-16 | 1.79E-08    | 1.40E-12 | 1.42E-08 | 0.576679    | 2.53E-05 |
| phe.Fasting_rs191766712 S7 | DIAPH1 | rs11524145 S5   | CDK6      | 7.80E-07 | 1.00E+00    | 4.86E-04 | 7.89E-06 | 1           | 6.69E-03 |
| phe.Fasting_rs191766712 S7 | DIAPH1 | rs115752779 S19 | NA        | 4.38E-16 | 1.79E-08    | 1.40E-12 | 1.42E-08 | 0.576679    | 2.53E-05 |
| phe.Fasting_rs191766712 S7 | DIAPH1 | rs115787552 S5  | KPNA3     | 2.97E-15 | 1.21E-07    | 8.14E-12 | 1.18E-13 | 4.80E-06    | 7.06E-10 |
| phe.Fasting_rs191766712 S7 | DIAPH1 | rs115888477 S8  | NA        | 2.03E-14 | 8.28E-07    | 5.02E-11 | 2.21E-14 | 8.99E-07    | 1.73E-10 |
| phe.Fasting_rs191766712 S7 | DIAPH1 | rs116011837 S9  | BRD2      | 4.89E-11 | 0.00199774  | 6.62E-08 | 4.07E-14 | 1.66E-06    | 2.85E-10 |
| phe.Fasting_rs191766712 S7 | DIAPH1 | rs116079984 S8  | KPNA3     | 2.97E-15 | 1.21E-07    | 8.14E-12 | 1.24E-13 | 5.04E-06    | 7.34E-10 |
| phe.Fasting_rs191766712 S7 | DIAPH1 | rs116120727 S9  | BRD2      | 4.89E-11 | 2.00E-03    | 6.62E-08 | 4.07E-14 | 1.66E-06    | 2.85E-10 |
| phe.Fasting_rs191766712 S7 | DIAPH1 | rs116406581 S2  | NA        | 1.81E-14 | 7.39E-07    | 4.52E-11 | 2.35E-07 | 1           | 3.05E-04 |
| phe.Fasting_rs191766712 S7 | DIAPH1 | rs116548615 S8  | TMEM45B   | 1.73E-16 | 7.06E-09    | 6.15E-13 | 8.70E-12 | 0.000354153 | 3.26E-08 |
| phe.Fasting_rs191766712 S7 | DIAPH1 | rs116696844 S3  | AP3M2     | 6.92E-15 | 2.83E-07    | 1.78E-11 | 3.87E-07 | 1           | 4.75E-04 |
| phe.Fasting_rs191766712 S7 | DIAPH1 | rs11989304 S4   | TMEM64    | 2.37E-06 | 1.00E+00    | 1.30E-03 | 6.78E-11 | 0.00276161  | 2.13E-07 |
| phe.Fasting_rs191766712 S7 | DIAPH1 | rs140524622 S7  | MRPL10    | 1.08E-16 | 4.41E-09    | 4.54E-13 | 7.35E-06 | 1           | 6.31E-03 |
| phe.Fasting_rs191766712 S7 | DIAPH1 | rs146815317 S5  | KPNA3     | 2.97E-15 | 1.21E-07    | 8.14E-12 | 1.18E-13 | 4.80E-06    | 7.06E-10 |
| phe.Fasting_rs191766712 S7 | DIAPH1 | rs150117838 S8  | KPNA3     | 2.97E-15 | 1.21E-07    | 8.14E-12 | 1.09E-13 | 4.44E-06    | 6.79E-10 |
| phe.Fasting_rs191766712 S7 | DIAPH1 | rs150916187 S4  | HIST1H2BK | 1.38E-05 | 1.00E+00    | 6.05E-03 | 1.37E-14 | 5.59E-07    | 1.16E-10 |
| phe.Fasting_rs191766712 S7 | DIAPH1 | rs16894241 S4   | HIST1H2BK | 1.99E-11 | 8.12E-04    | 2.96E-08 | 3.44E-14 | 1.40E-06    | 2.50E-10 |
| phe.Fasting_rs191766712 S7 | DIAPH1 | rs2032062 S8    | NA        | 1.22E-14 | 4.98E-07    | 3.09E-11 | 8.48E-06 | 1           | 7.14E-03 |
| phe.Fasting_rs191766712 S7 | DIAPH1 | rs2153597 S8    | ZNF438    | 5.51E-11 | 0.00224928  | 7.42E-08 | 4.52E-09 | 0.183916    | 9.08E-06 |
| phe.Fasting_rs191766712 S7 | DIAPH1 | rs2835656 S7    | TTC3      | 3.01E-10 | 0.0122766   | 3.60E-07 | 9.12E-06 | 1           | 7.57E-03 |
| phe.Fasting_rs191766712 S7 | DIAPH1 | rs34801978 S3   | HOXB2     | 1.23E-05 | 1           | 5.46E-03 | 1.03E-08 | 0.419057    | 1.90E-05 |
| phe.Fasting_rs191766712 S7 | DIAPH1 | rs352346 S3     | GRPEL2    | 1.85E-11 | 0.000754995 | 2.78E-08 | 8.42E-06 | 1           | 7.10E-03 |
| phe.Fasting_rs191766712 S7 | DIAPH1 | rs3750898 S8    | DCLRE1A   | 2.29E-05 | 1           | 9.35E-03 | 8.76E-06 | 1           | 7.32E-03 |
| phe.Fasting_rs191766712 S7 | DIAPH1 | rs4732511 S13   | POR       | 2.30E-15 | 9.39E-08    | 6.48E-12 | 9.65E-06 | 1           | 7.93E-03 |
| phe.Fasting_rs191766712 S7 | DIAPH1 | rs57503635 S3   | NA        | 6.34E-16 | 2.59E-08    | 1.95E-12 | 3.17E-14 | 1.29E-06    | 2.34E-10 |
| phe.Fasting_rs191766712 S7 | DIAPH1 | rs58905476 S7   | TTC3      | 3.29E-10 | 1.34E-02    | 3.90E-07 | 9.79E-06 | 1           | 8.01E-03 |
| phe.Fasting_rs191766712 S7 | DIAPH1 | rs60011869 S16  | NA        | 1.04E-05 | 1           | 4.72E-03 | 8.16E-10 | 0.0332257   | 1.98E-06 |
| phe.Fasting_rs191766712 S7 | DIAPH1 | rs6964407 S7    | POR       | 7.55E-15 | 3.08E-07    | 1.94E-11 | 8.91E-06 | 1           | 7.43E-03 |
| phe.Fasting_rs191766712 S7 | DIAPH1 | rs7004597 S8    | NA        | 4.51E-15 | 1.84E-07    | 1.18E-11 | 2.34E-07 | 1           | 3.04E-04 |
| phe.Fasting_rs191766712 S7 | DIAPH1 | rs7256517 S7    | CYTH2     | 1.04E-15 | 4.24E-08    | 3.06E-12 | 4.82E-12 | 0.000196022 | 1.91E-08 |
| phe.Fasting_rs191766712 S7 | DIAPH1 | rs73283603 S7   | ZWINT     | 1.90E-06 | 1.00E+00    | 1.07E-03 | 2.03E-07 | 1           | 2.68E-04 |
| phe.Fasting_rs191766712 S7 | DIAPH1 | rs73392640 S8   | POLR3B    | 2.02E-10 | 8.26E-03    | 2.49E-07 | 5.19E-11 | 0.00211214  | 1.67E-07 |

|                           |        |             |     |             |          |            |             |          |             |          |
|---------------------------|--------|-------------|-----|-------------|----------|------------|-------------|----------|-------------|----------|
| phe.Fasting_rs191766712S7 | DIAPH1 | rs734069    | S19 | NA          | 2.06E-08 | 0.839421   | 1.81E-05    | 6.71E-10 | 0.0272994   | 1.68E-06 |
| phe.Fasting_rs191766712S7 | DIAPH1 | rs73619637  | S8  | NA          | 1.44E-15 | 5.89E-08   | 4.14E-12    | 2.05E-10 | 0.00833668  | 5.78E-07 |
| phe.Fasting_rs191766712S7 | DIAPH1 | rs74627895  | S8  | TMEM64      | 7.32E-07 | 1          | 0.000459899 | 2.03E-08 | 0.828094    | 3.48E-05 |
| phe.Fasting_rs191766712S7 | DIAPH1 | rs74914207  | S24 | NA          | 1.37E-10 | 0.00558626 | 1.73E-07    | 9.12E-11 | 0.0037135   | 2.80E-07 |
| phe.Fasting_rs191766712S7 | DIAPH1 | rs75350765  | S5  | RCL1        | 1.82E-16 | 7.42E-09   | 6.37E-13    | 3.70E-08 | 1           | 5.84E-05 |
| phe.Fasting_rs191766712S7 | DIAPH1 | rs75374128  | S5  | CNTLN       | 1.47E-16 | 6.01E-09   | 5.72E-13    | 1.01E-07 | 1           | 1.42E-04 |
| phe.Fasting_rs191766712S7 | DIAPH1 | rs75506779  | S5  | TMCO3       | 5.55E-07 | 1          | 0.000360863 | 1.10E-08 | 0.449707    | 2.03E-05 |
| phe.Fasting_rs191766712S7 | DIAPH1 | rs75758702  | S24 | NA          | 7.02E-17 | 2.87E-09   | 3.16E-13    | 1.57E-10 | 0.00638323  | 4.59E-07 |
| phe.Fasting_rs191766712S7 | DIAPH1 | rs75864203  | S8  | CNTLN       | 1.47E-16 | 6.01E-09   | 5.72E-13    | 1.01E-07 | 1           | 1.42E-04 |
| phe.Fasting_rs191766712S7 | DIAPH1 | rs75949566  | S5  | TMEM64      | 2.76E-06 | 1          | 0.001473    | 8.48E-11 | 0.00345267  | 2.62E-07 |
| phe.Fasting_rs191766712S7 | DIAPH1 | rs76844308  | S8  | CNTLN       | 7.68E-17 | 3.14E-09   | 3.41E-13    | 9.52E-08 | 1           | 1.35E-04 |
| phe.Fasting_rs191766712S7 | DIAPH1 | rs7763107   | S8  | FARS2       | 5.78E-16 | 2.36E-08   | 1.79E-12    | 9.23E-12 | 0.000375564 | 3.44E-08 |
| phe.Fasting_rs191766712S7 | DIAPH1 | rs77798597  | S7  | KPNA3       | 2.97E-15 | 1.21E-07   | 8.14E-12    | 1.09E-13 | 4.44E-06    | 6.79E-10 |
| phe.Fasting_rs191766712S7 | DIAPH1 | rs77845645  | S21 | NA          | 1.53E-06 | 1.00E+00   | 8.88E-04    | 4.20E-11 | 0.00170882  | 1.38E-07 |
| phe.Fasting_rs191766712S7 | DIAPH1 | rs78353402  | S8  | AP3M2       | 4.51E-15 | 1.84E-07   | 1.18E-11    | 3.87E-07 | 1           | 4.75E-04 |
| phe.Fasting_rs191766712S7 | DIAPH1 | rs78516788  | S8  | SLC38A1     | 2.75E-11 | 1.12E-03   | 3.94E-08    | 2.44E-10 | 0.00992686  | 6.74E-07 |
| phe.Fasting_rs191766712S7 | DIAPH1 | rs78697063  | S5  | MSI2        | 8.23E-19 | 3.36E-11   | 2.70E-14    | 6.84E-10 | 0.0278369   | 1.70E-06 |
| phe.Fasting_rs191766712S7 | DIAPH1 | rs78722272  | S5  | CNTLN       | 1.47E-16 | 6.01E-09   | 5.72E-13    | 1.05E-07 | 1           | 1.48E-04 |
| phe.Fasting_rs191766712S7 | DIAPH1 | rs78736524  | S5  | KPNA3       | 2.97E-15 | 1.21E-07   | 8.14E-12    | 1.18E-13 | 4.80E-06    | 7.06E-10 |
| phe.Fasting_rs191766712S7 | DIAPH1 | rs78990344  | S2  | LOC10050631 | 2.37E-06 | 1          | 0.00129547  | 6.78E-11 | 0.00276161  | 2.13E-07 |
| phe.Fasting_rs191766712S7 | DIAPH1 | rs79781495  | S8  | KPNA3       | 2.97E-15 | 1.21E-07   | 8.14E-12    | 1.09E-13 | 4.44E-06    | 6.79E-10 |
| phe.Fasting_rs191766712S7 | DIAPH1 | rs79886603  | S15 | NA          | 8.71E-08 | 1          | 6.74E-05    | 4.66E-07 | 1           | 5.59E-04 |
| phe.Fasting_rs191766712S7 | DIAPH1 | rs80200953  | S8  | PPP2R5D     | 8.49E-17 | 3.47E-09   | 3.69E-13    | 3.65E-09 | 0.148399    | 7.55E-06 |
| phe.Fasting_rs191766712S7 | DIAPH1 | rs80332465  | S5  | KPNA3       | 3.13E-15 | 1.28E-07   | 8.51E-12    | 1.17E-13 | 4.77E-06    | 7.06E-10 |
| phe.Fasting_rs191766712S7 | DIAPH1 | rs80334773  | S5  | KPNA3       | 3.13E-15 | 1.28E-07   | 8.51E-12    | 1.17E-13 | 4.77E-06    | 7.06E-10 |
| phe.Fasting_rs192690040S7 | DIAPH1 | rs111576333 | S5  | TMEM64      | 2.37E-06 | 1.00E+00   | 1.30E-03    | 5.87E-14 | 2.39E-06    | 3.99E-10 |
| phe.Fasting_rs192690040S7 | DIAPH1 | rs112089881 | S8  | ZFAND4      | 2.04E-17 | 8.32E-10   | 1.43E-13    | 1.09E-09 | 0.0445256   | 2.58E-06 |
| phe.Fasting_rs192690040S7 | DIAPH1 | rs112091318 | S5  | TMEM64      | 7.32E-07 | 1          | 0.000459899 | 3.91E-08 | 1           | 6.13E-05 |
| phe.Fasting_rs192690040S7 | DIAPH1 | rs114334325 | S7  | AP3M2       | 4.51E-15 | 1.84E-07   | 1.18E-11    | 3.87E-07 | 1           | 4.75E-04 |
| phe.Fasting_rs192690040S7 | DIAPH1 | rs114394395 | S7  | AP3M2       | 4.81E-15 | 1.97E-07   | 1.25E-11    | 3.87E-07 | 1           | 4.75E-04 |
| phe.Fasting_rs192690040S7 | DIAPH1 | rs114565620 | S8  | RCL1        | 1.82E-16 | 7.42E-09   | 6.37E-13    | 3.70E-08 | 1           | 5.84E-05 |
| phe.Fasting_rs192690040S7 | DIAPH1 | rs115083290 | S19 | NA          | 4.38E-16 | 1.79E-08   | 1.40E-12    | 1.42E-08 | 0.576679    | 2.53E-05 |
| phe.Fasting_rs192690040S7 | DIAPH1 | rs11524145  | S5  | CDK6        | 7.80E-07 | 1          | 4.86E-04    | 7.89E-06 | 1           | 6.69E-03 |
| phe.Fasting_rs192690040S7 | DIAPH1 | rs115752779 | S19 | NA          | 4.38E-16 | 1.79E-08   | 1.40E-12    | 1.42E-08 | 0.576679    | 2.53E-05 |
| phe.Fasting_rs192690040S7 | DIAPH1 | rs115787552 | S5  | KPNA3       | 2.97E-15 | 1.21E-07   | 8.14E-12    | 1.18E-13 | 4.80E-06    | 7.06E-10 |
| phe.Fasting_rs192690040S7 | DIAPH1 | rs115888477 | S8  | NA          | 2.03E-14 | 8.28E-07   | 5.02E-11    | 2.21E-14 | 8.99E-07    | 1.73E-10 |
| phe.Fasting_rs192690040S7 | DIAPH1 | rs116011837 | S9  | BRD2        | 4.89E-11 | 0.00199774 | 6.62E-08    | 4.07E-14 | 1.66E-06    | 2.85E-10 |
| phe.Fasting_rs192690040S7 | DIAPH1 | rs116079984 | S8  | KPNA3       | 2.97E-15 | 1.21E-07   | 8.14E-12    | 1.24E-13 | 5.04E-06    | 7.34E-10 |
| phe.Fasting_rs192690040S7 | DIAPH1 | rs116120727 | S9  | BRD2        | 4.89E-11 | 0.00199774 | 6.62E-08    | 4.07E-14 | 1.66E-06    | 2.85E-10 |
| phe.Fasting_rs192690040S7 | DIAPH1 | rs116406581 | S2  | NA          | 1.81E-14 | 7.39E-07   | 4.52E-11    | 2.35E-07 | 1           | 3.05E-04 |

|                           |        |                |           |          |            |             |          |             |          |
|---------------------------|--------|----------------|-----------|----------|------------|-------------|----------|-------------|----------|
| phe.Fasting_rs192690040S7 | DIAPH1 | rs116548615 S8 | TMEM45B   | 1.73E-16 | 7.06E-09   | 6.15E-13    | 8.70E-12 | 0.000354153 | 3.26E-08 |
| phe.Fasting_rs192690040S7 | DIAPH1 | rs116696844 S3 | AP3M2     | 6.92E-15 | 2.83E-07   | 1.78E-11    | 3.87E-07 | 1           | 4.75E-04 |
| phe.Fasting_rs192690040S7 | DIAPH1 | rs11989304 S4  | TMEM64    | 2.37E-06 | 1          | 1.30E-03    | 6.78E-11 | 0.00276161  | 2.13E-07 |
| phe.Fasting_rs192690040S7 | DIAPH1 | rs140524622 S7 | MRPL10    | 1.08E-16 | 4.41E-09   | 4.54E-13    | 7.35E-06 | 1           | 6.31E-03 |
| phe.Fasting_rs192690040S7 | DIAPH1 | rs146815317 S5 | KPNA3     | 2.97E-15 | 1.21E-07   | 8.14E-12    | 1.18E-13 | 4.80E-06    | 7.06E-10 |
| phe.Fasting_rs192690040S7 | DIAPH1 | rs150117838 S8 | KPNA3     | 2.97E-15 | 1.21E-07   | 8.14E-12    | 1.09E-13 | 4.44E-06    | 6.79E-10 |
| phe.Fasting_rs192690040S7 | DIAPH1 | rs150916187 S4 | HIST1H2BK | 1.38E-05 | 1.00E+00   | 6.05E-03    | 1.37E-14 | 5.59E-07    | 1.16E-10 |
| phe.Fasting_rs192690040S7 | DIAPH1 | rs16894241 S4  | HIST1H2BK | 1.99E-11 | 8.12E-04   | 2.96E-08    | 3.44E-14 | 1.40E-06    | 2.50E-10 |
| phe.Fasting_rs192690040S7 | DIAPH1 | rs2032062 S8   | NA        | 1.22E-14 | 4.98E-07   | 3.09E-11    | 8.48E-06 | 1           | 7.14E-03 |
| phe.Fasting_rs192690040S7 | DIAPH1 | rs2153597 S8   | ZNF438    | 5.51E-11 | 2.25E-03   | 7.42E-08    | 4.52E-09 | 0.183916    | 9.08E-06 |
| phe.Fasting_rs192690040S7 | DIAPH1 | rs2835656 S7   | TTC3      | 3.01E-10 | 0.0122766  | 3.60E-07    | 9.12E-06 | 1           | 7.57E-03 |
| phe.Fasting_rs192690040S7 | DIAPH1 | rs34801978 S3  | HOXB2     | 1.23E-05 | 1          | 0.00545724  | 1.03E-08 | 0.419057    | 1.90E-05 |
| phe.Fasting_rs192690040S7 | DIAPH1 | rs352346 S3    | GRPEL2    | 1.85E-11 | 7.55E-04   | 2.78E-08    | 8.42E-06 | 1           | 7.10E-03 |
| phe.Fasting_rs192690040S7 | DIAPH1 | rs3750898 S8   | DCLRE1A   | 2.29E-05 | 1          | 0.0093502   | 8.76E-06 | 1           | 7.32E-03 |
| phe.Fasting_rs192690040S7 | DIAPH1 | rs4732511 S13  | POR       | 2.30E-15 | 9.39E-08   | 6.48E-12    | 9.65E-06 | 1           | 7.93E-03 |
| phe.Fasting_rs192690040S7 | DIAPH1 | rs57503635 S3  | NA        | 6.34E-16 | 2.59E-08   | 1.95E-12    | 3.17E-14 | 1.29E-06    | 2.34E-10 |
| phe.Fasting_rs192690040S7 | DIAPH1 | rs58905476 S7  | TTC3      | 3.29E-10 | 1.34E-02   | 3.90E-07    | 9.79E-06 | 1           | 8.01E-03 |
| phe.Fasting_rs192690040S7 | DIAPH1 | rs60011869 S16 | NA        | 1.04E-05 | 1.00E+00   | 4.72E-03    | 8.16E-10 | 0.0332257   | 1.98E-06 |
| phe.Fasting_rs192690040S7 | DIAPH1 | rs6964407 S7   | POR       | 7.55E-15 | 3.08E-07   | 1.94E-11    | 8.91E-06 | 1           | 7.43E-03 |
| phe.Fasting_rs192690040S7 | DIAPH1 | rs7004597 S8   | NA        | 4.51E-15 | 1.84E-07   | 1.18E-11    | 2.34E-07 | 1           | 3.04E-04 |
| phe.Fasting_rs192690040S7 | DIAPH1 | rs7256517 S7   | CYTH2     | 1.04E-15 | 4.24E-08   | 3.06E-12    | 4.82E-12 | 0.000196022 | 1.91E-08 |
| phe.Fasting_rs192690040S7 | DIAPH1 | rs73283603 S7  | ZWINT     | 1.90E-06 | 1          | 1.07E-03    | 2.03E-07 | 1           | 2.68E-04 |
| phe.Fasting_rs192690040S7 | DIAPH1 | rs73392640 S8  | POLR3B    | 2.02E-10 | 0.00826001 | 2.49E-07    | 5.19E-11 | 0.00211214  | 1.67E-07 |
| phe.Fasting_rs192690040S7 | DIAPH1 | rs734069 S19   | NA        | 2.06E-08 | 0.839421   | 1.81E-05    | 6.71E-10 | 0.0272994   | 1.68E-06 |
| phe.Fasting_rs192690040S7 | DIAPH1 | rs73619637 S8  | NA        | 1.44E-15 | 5.89E-08   | 4.14E-12    | 2.05E-10 | 0.00833668  | 5.78E-07 |
| phe.Fasting_rs192690040S7 | DIAPH1 | rs74627895 S8  | TMEM64    | 7.32E-07 | 1          | 4.60E-04    | 2.03E-08 | 0.828094    | 3.48E-05 |
| phe.Fasting_rs192690040S7 | DIAPH1 | rs74914207 S24 | NA        | 1.37E-10 | 0.00558626 | 1.73E-07    | 9.12E-11 | 0.0037135   | 2.80E-07 |
| phe.Fasting_rs192690040S7 | DIAPH1 | rs75350765 S5  | RCL1      | 1.82E-16 | 7.42E-09   | 6.37E-13    | 3.70E-08 | 1           | 5.84E-05 |
| phe.Fasting_rs192690040S7 | DIAPH1 | rs75374128 S5  | CNTLN     | 1.47E-16 | 6.01E-09   | 5.72E-13    | 1.01E-07 | 1           | 1.42E-04 |
| phe.Fasting_rs192690040S7 | DIAPH1 | rs75506779 S5  | TMCO3     | 5.55E-07 | 1          | 0.000360863 | 1.10E-08 | 0.449707    | 2.03E-05 |
| phe.Fasting_rs192690040S7 | DIAPH1 | rs75758702 S24 | NA        | 7.02E-17 | 2.87E-09   | 3.16E-13    | 1.57E-10 | 0.00638323  | 4.59E-07 |
| phe.Fasting_rs192690040S7 | DIAPH1 | rs75864203 S8  | CNTLN     | 1.47E-16 | 6.01E-09   | 5.72E-13    | 1.01E-07 | 1           | 1.42E-04 |
| phe.Fasting_rs192690040S7 | DIAPH1 | rs75949566 S5  | TMEM64    | 2.76E-06 | 1          | 0.001473    | 8.48E-11 | 0.00345267  | 2.62E-07 |
| phe.Fasting_rs192690040S7 | DIAPH1 | rs76844308 S8  | CNTLN     | 7.68E-17 | 3.14E-09   | 3.41E-13    | 9.52E-08 | 1           | 1.35E-04 |
| phe.Fasting_rs192690040S7 | DIAPH1 | rs7763107 S8   | FARS2     | 5.78E-16 | 2.36E-08   | 1.79E-12    | 9.23E-12 | 0.000375564 | 3.44E-08 |
| phe.Fasting_rs192690040S7 | DIAPH1 | rs77798597 S7  | KPNA3     | 2.97E-15 | 1.21E-07   | 8.14E-12    | 1.09E-13 | 4.44E-06    | 6.79E-10 |
| phe.Fasting_rs192690040S7 | DIAPH1 | rs77845645 S21 | NA        | 1.53E-06 | 1          | 0.000888475 | 4.20E-11 | 0.00170882  | 1.38E-07 |
| phe.Fasting_rs192690040S7 | DIAPH1 | rs78353402 S8  | AP3M2     | 4.51E-15 | 1.84E-07   | 1.18E-11    | 3.87E-07 | 1           | 4.75E-04 |
| phe.Fasting_rs192690040S7 | DIAPH1 | rs78516788 S8  | SLC38A1   | 2.75E-11 | 0.00112269 | 3.94E-08    | 2.44E-10 | 0.00992686  | 6.74E-07 |
| phe.Fasting_rs192690040S7 | DIAPH1 | rs78697063 S5  | MSI2      | 8.23E-19 | 3.36E-11   | 2.70E-14    | 6.84E-10 | 0.0278369   | 1.70E-06 |

|                           |        |             |     |             |          |             |             |          |             |          |
|---------------------------|--------|-------------|-----|-------------|----------|-------------|-------------|----------|-------------|----------|
| phe.Fasting_rs192690040S7 | DIAPH1 | rs78722272  | S5  | CNTLN       | 1.47E-16 | 6.01E-09    | 5.72E-13    | 1.05E-07 | 1           | 1.48E-04 |
| phe.Fasting_rs192690040S7 | DIAPH1 | rs78736524  | S5  | KPNA3       | 2.97E-15 | 1.21E-07    | 8.14E-12    | 1.18E-13 | 4.80E-06    | 7.06E-10 |
| phe.Fasting_rs192690040S7 | DIAPH1 | rs78990344  | S2  | LOC10050631 | 2.37E-06 | 1           | 0.00129547  | 6.78E-11 | 0.00276161  | 2.13E-07 |
| phe.Fasting_rs192690040S7 | DIAPH1 | rs79781495  | S8  | KPNA3       | 2.97E-15 | 1.21E-07    | 8.14E-12    | 1.09E-13 | 4.44E-06    | 6.79E-10 |
| phe.Fasting_rs192690040S7 | DIAPH1 | rs79886603  | S15 | NA          | 8.71E-08 | 1           | 6.74E-05    | 4.66E-07 | 1           | 5.59E-04 |
| phe.Fasting_rs192690040S7 | DIAPH1 | rs80200953  | S8  | PPP2R5D     | 8.49E-17 | 3.47E-09    | 3.69E-13    | 3.65E-09 | 0.148399    | 7.55E-06 |
| phe.Fasting_rs192690040S7 | DIAPH1 | rs80332465  | S5  | KPNA3       | 3.13E-15 | 1.28E-07    | 8.51E-12    | 1.17E-13 | 4.77E-06    | 7.06E-10 |
| phe.Fasting_rs192690040S7 | DIAPH1 | rs80334773  | S5  | KPNA3       | 3.13E-15 | 1.28E-07    | 8.51E-12    | 1.17E-13 | 4.77E-06    | 7.06E-10 |
| phe.Fasting_rs192765219S7 | DIAPH1 | rs111576333 | S5  | TMEM64      | 2.37E-06 | 1           | 0.00129547  | 5.87E-14 | 2.39E-06    | 3.99E-10 |
| phe.Fasting_rs192765219S7 | DIAPH1 | rs112089881 | S8  | ZFAND4      | 2.04E-17 | 8.32E-10    | 1.43E-13    | 1.09E-09 | 0.0445256   | 2.58E-06 |
| phe.Fasting_rs192765219S7 | DIAPH1 | rs112091318 | S5  | TMEM64      | 7.32E-07 | 1           | 0.000459899 | 3.91E-08 | 1           | 6.13E-05 |
| phe.Fasting_rs192765219S7 | DIAPH1 | rs114334325 | S7  | AP3M2       | 4.51E-15 | 1.84E-07    | 1.18E-11    | 3.87E-07 | 1           | 4.75E-04 |
| phe.Fasting_rs192765219S7 | DIAPH1 | rs114394395 | S7  | AP3M2       | 4.81E-15 | 1.97E-07    | 1.25E-11    | 3.87E-07 | 1           | 4.75E-04 |
| phe.Fasting_rs192765219S7 | DIAPH1 | rs114565620 | S8  | RCL1        | 1.82E-16 | 7.42E-09    | 6.37E-13    | 3.70E-08 | 1           | 5.84E-05 |
| phe.Fasting_rs192765219S7 | DIAPH1 | rs115083290 | S19 | NA          | 4.38E-16 | 1.79E-08    | 1.40E-12    | 1.42E-08 | 0.576679    | 2.53E-05 |
| phe.Fasting_rs192765219S7 | DIAPH1 | rs11524145  | S5  | CDK6        | 7.80E-07 | 1           | 0.000486356 | 7.89E-06 | 1           | 6.69E-03 |
| phe.Fasting_rs192765219S7 | DIAPH1 | rs115752779 | S19 | NA          | 4.38E-16 | 1.79E-08    | 1.40E-12    | 1.42E-08 | 0.576679    | 2.53E-05 |
| phe.Fasting_rs192765219S7 | DIAPH1 | rs115787552 | S5  | KPNA3       | 2.97E-15 | 1.21E-07    | 8.14E-12    | 1.18E-13 | 4.80E-06    | 7.06E-10 |
| phe.Fasting_rs192765219S7 | DIAPH1 | rs115888477 | S8  | NA          | 2.03E-14 | 8.28E-07    | 5.02E-11    | 2.21E-14 | 8.99E-07    | 1.73E-10 |
| phe.Fasting_rs192765219S7 | DIAPH1 | rs116011837 | S9  | BRD2        | 4.89E-11 | 0.00199774  | 6.62E-08    | 4.07E-14 | 1.66E-06    | 2.85E-10 |
| phe.Fasting_rs192765219S7 | DIAPH1 | rs116079984 | S8  | KPNA3       | 2.97E-15 | 1.21E-07    | 8.14E-12    | 1.24E-13 | 5.04E-06    | 7.34E-10 |
| phe.Fasting_rs192765219S7 | DIAPH1 | rs116120727 | S9  | BRD2        | 4.89E-11 | 0.00199774  | 6.62E-08    | 4.07E-14 | 1.66E-06    | 2.85E-10 |
| phe.Fasting_rs192765219S7 | DIAPH1 | rs116406581 | S2  | NA          | 1.81E-14 | 7.39E-07    | 4.52E-11    | 2.35E-07 | 1           | 3.05E-04 |
| phe.Fasting_rs192765219S7 | DIAPH1 | rs116548615 | S8  | TMEM45B     | 1.73E-16 | 7.06E-09    | 6.15E-13    | 8.70E-12 | 0.000354153 | 3.26E-08 |
| phe.Fasting_rs192765219S7 | DIAPH1 | rs116696844 | S3  | AP3M2       | 6.92E-15 | 2.83E-07    | 1.78E-11    | 3.87E-07 | 1           | 4.75E-04 |
| phe.Fasting_rs192765219S7 | DIAPH1 | rs11989304  | S4  | TMEM64      | 2.37E-06 | 1           | 0.00129547  | 6.78E-11 | 0.00276161  | 2.13E-07 |
| phe.Fasting_rs192765219S7 | DIAPH1 | rs140524622 | S7  | MRPL10      | 1.08E-16 | 4.41E-09    | 4.54E-13    | 7.35E-06 | 1           | 6.31E-03 |
| phe.Fasting_rs192765219S7 | DIAPH1 | rs146815317 | S5  | KPNA3       | 2.97E-15 | 1.21E-07    | 8.14E-12    | 1.18E-13 | 4.80E-06    | 7.06E-10 |
| phe.Fasting_rs192765219S7 | DIAPH1 | rs150117838 | S8  | KPNA3       | 2.97E-15 | 1.21E-07    | 8.14E-12    | 1.09E-13 | 4.44E-06    | 6.79E-10 |
| phe.Fasting_rs192765219S7 | DIAPH1 | rs150916187 | S4  | HIST1H2BK   | 1.38E-05 | 1           | 0.00605332  | 1.37E-14 | 5.59E-07    | 1.16E-10 |
| phe.Fasting_rs192765219S7 | DIAPH1 | rs16894241  | S4  | HIST1H2BK   | 1.99E-11 | 0.000812315 | 2.96E-08    | 3.44E-14 | 1.40E-06    | 2.50E-10 |
| phe.Fasting_rs192765219S7 | DIAPH1 | rs2032062   | S8  | NA          | 1.22E-14 | 4.98E-07    | 3.09E-11    | 8.48E-06 | 1           | 7.14E-03 |
| phe.Fasting_rs192765219S7 | DIAPH1 | rs2153597   | S8  | ZNF438      | 5.51E-11 | 0.00224928  | 7.42E-08    | 4.52E-09 | 0.183916    | 9.08E-06 |
| phe.Fasting_rs192765219S7 | DIAPH1 | rs2835656   | S7  | TTC3        | 3.01E-10 | 1.23E-02    | 3.60E-07    | 9.12E-06 | 1           | 7.57E-03 |
| phe.Fasting_rs192765219S7 | DIAPH1 | rs34801978  | S3  | HOXB2       | 1.23E-05 | 1.00E+00    | 5.46E-03    | 1.03E-08 | 0.419057    | 1.90E-05 |
| phe.Fasting_rs192765219S7 | DIAPH1 | rs352346    | S3  | GRPEL2      | 1.85E-11 | 7.55E-04    | 2.78E-08    | 8.42E-06 | 1           | 7.10E-03 |
| phe.Fasting_rs192765219S7 | DIAPH1 | rs3750898   | S8  | DCLRE1A     | 2.29E-05 | 1.00E+00    | 9.35E-03    | 8.76E-06 | 1           | 7.32E-03 |
| phe.Fasting_rs192765219S7 | DIAPH1 | rs4732511   | S13 | POR         | 2.30E-15 | 9.39E-08    | 6.48E-12    | 9.65E-06 | 1           | 7.93E-03 |
| phe.Fasting_rs192765219S7 | DIAPH1 | rs57503635  | S3  | NA          | 6.34E-16 | 2.59E-08    | 1.95E-12    | 3.17E-14 | 1.29E-06    | 2.34E-10 |
| phe.Fasting_rs192765219S7 | DIAPH1 | rs58905476  | S7  | TTC3        | 3.29E-10 | 0.0134302   | 3.90E-07    | 9.79E-06 | 1           | 8.01E-03 |

|                           |        |             |     |            |          |            |          |          |             |          |
|---------------------------|--------|-------------|-----|------------|----------|------------|----------|----------|-------------|----------|
| phe.Fasting_rs192765219S7 | DIAPH1 | rs60011869  | S16 | NA         | 1.04E-05 | 1.00E+00   | 4.72E-03 | 8.16E-10 | 0.0332257   | 1.98E-06 |
| phe.Fasting_rs192765219S7 | DIAPH1 | rs6964407   | S7  | POR        | 7.55E-15 | 3.08E-07   | 1.94E-11 | 8.91E-06 | 1           | 7.43E-03 |
| phe.Fasting_rs192765219S7 | DIAPH1 | rs7004597   | S8  | NA         | 4.51E-15 | 1.84E-07   | 1.18E-11 | 2.34E-07 | 1           | 3.04E-04 |
| phe.Fasting_rs192765219S7 | DIAPH1 | rs7256517   | S7  | CYTH2      | 1.04E-15 | 4.24E-08   | 3.06E-12 | 4.82E-12 | 0.000196022 | 1.91E-08 |
| phe.Fasting_rs192765219S7 | DIAPH1 | rs73283603  | S7  | ZWINT      | 1.90E-06 | 1.00E+00   | 1.07E-03 | 2.03E-07 | 1           | 2.68E-04 |
| phe.Fasting_rs192765219S7 | DIAPH1 | rs73392640  | S8  | POLR3B     | 2.02E-10 | 8.26E-03   | 2.49E-07 | 5.19E-11 | 0.00211214  | 1.67E-07 |
| phe.Fasting_rs192765219S7 | DIAPH1 | rs734069    | S19 | NA         | 2.06E-08 | 0.839421   | 1.81E-05 | 6.71E-10 | 0.0272994   | 1.68E-06 |
| phe.Fasting_rs192765219S7 | DIAPH1 | rs73619637  | S8  | NA         | 1.44E-15 | 5.89E-08   | 4.14E-12 | 2.05E-10 | 0.00833668  | 5.78E-07 |
| phe.Fasting_rs192765219S7 | DIAPH1 | rs74627895  | S8  | TMEM64     | 7.32E-07 | 1          | 4.60E-04 | 2.03E-08 | 0.828094    | 3.48E-05 |
| phe.Fasting_rs192765219S7 | DIAPH1 | rs74914207  | S24 | NA         | 1.37E-10 | 0.00558626 | 1.73E-07 | 9.12E-11 | 0.0037135   | 2.80E-07 |
| phe.Fasting_rs192765219S7 | DIAPH1 | rs75350765  | S5  | RCL1       | 1.82E-16 | 7.42E-09   | 6.37E-13 | 3.70E-08 | 1           | 5.84E-05 |
| phe.Fasting_rs192765219S7 | DIAPH1 | rs75374128  | S5  | CNTLN      | 1.47E-16 | 6.01E-09   | 5.72E-13 | 1.01E-07 | 1           | 1.42E-04 |
| phe.Fasting_rs192765219S7 | DIAPH1 | rs75506779  | S5  | TMCO3      | 5.55E-07 | 1.00E+00   | 3.61E-04 | 1.10E-08 | 0.449707    | 2.03E-05 |
| phe.Fasting_rs192765219S7 | DIAPH1 | rs75758702  | S24 | NA         | 7.02E-17 | 2.87E-09   | 3.16E-13 | 1.57E-10 | 0.00638323  | 4.59E-07 |
| phe.Fasting_rs192765219S7 | DIAPH1 | rs75864203  | S8  | CNTLN      | 1.47E-16 | 6.01E-09   | 5.72E-13 | 1.01E-07 | 1           | 1.42E-04 |
| phe.Fasting_rs192765219S7 | DIAPH1 | rs75949566  | S5  | TMEM64     | 2.76E-06 | 1.00E+00   | 1.47E-03 | 8.48E-11 | 0.00345267  | 2.62E-07 |
| phe.Fasting_rs192765219S7 | DIAPH1 | rs76844308  | S8  | CNTLN      | 7.68E-17 | 3.14E-09   | 3.41E-13 | 9.52E-08 | 1           | 1.35E-04 |
| phe.Fasting_rs192765219S7 | DIAPH1 | rs7763107   | S8  | FARS2      | 5.78E-16 | 2.36E-08   | 1.79E-12 | 9.23E-12 | 0.000375564 | 3.44E-08 |
| phe.Fasting_rs192765219S7 | DIAPH1 | rs77798597  | S7  | KPNA3      | 2.97E-15 | 1.21E-07   | 8.14E-12 | 1.09E-13 | 4.44E-06    | 6.79E-10 |
| phe.Fasting_rs192765219S7 | DIAPH1 | rs77845645  | S21 | NA         | 1.53E-06 | 1.00E+00   | 8.88E-04 | 4.20E-11 | 0.00170882  | 1.38E-07 |
| phe.Fasting_rs192765219S7 | DIAPH1 | rs78353402  | S8  | AP3M2      | 4.51E-15 | 1.84E-07   | 1.18E-11 | 3.87E-07 | 1           | 4.75E-04 |
| phe.Fasting_rs192765219S7 | DIAPH1 | rs78516788  | S8  | SLC38A1    | 2.75E-11 | 1.12E-03   | 3.94E-08 | 2.44E-10 | 0.00992686  | 6.74E-07 |
| phe.Fasting_rs192765219S7 | DIAPH1 | rs78697063  | S5  | MSI2       | 8.23E-19 | 3.36E-11   | 2.70E-14 | 6.84E-10 | 0.0278369   | 1.70E-06 |
| phe.Fasting_rs192765219S7 | DIAPH1 | rs78722272  | S5  | CNTLN      | 1.47E-16 | 6.01E-09   | 5.72E-13 | 1.05E-07 | 1           | 1.48E-04 |
| phe.Fasting_rs192765219S7 | DIAPH1 | rs78736524  | S5  | KPNA3      | 2.97E-15 | 1.21E-07   | 8.14E-12 | 1.18E-13 | 4.80E-06    | 7.06E-10 |
| phe.Fasting_rs192765219S7 | DIAPH1 | rs78990344  | S2  | LOC1005063 | 2.37E-06 | 1          | 1.30E-03 | 6.78E-11 | 0.00276161  | 2.13E-07 |
| phe.Fasting_rs192765219S7 | DIAPH1 | rs79781495  | S8  | KPNA3      | 2.97E-15 | 1.21E-07   | 8.14E-12 | 1.09E-13 | 4.44E-06    | 6.79E-10 |
| phe.Fasting_rs192765219S7 | DIAPH1 | rs79886603  | S15 | NA         | 8.71E-08 | 1          | 6.74E-05 | 4.66E-07 | 1           | 5.59E-04 |
| phe.Fasting_rs192765219S7 | DIAPH1 | rs80200953  | S8  | PPP2R5D    | 8.49E-17 | 3.47E-09   | 3.69E-13 | 3.65E-09 | 0.148399    | 7.55E-06 |
| phe.Fasting_rs192765219S7 | DIAPH1 | rs80332465  | S5  | KPNA3      | 3.13E-15 | 1.28E-07   | 8.51E-12 | 1.17E-13 | 4.77E-06    | 7.06E-10 |
| phe.Fasting_rs192765219S7 | DIAPH1 | rs80334773  | S5  | KPNA3      | 3.13E-15 | 1.28E-07   | 8.51E-12 | 1.17E-13 | 4.77E-06    | 7.06E-10 |
| phe.Fasting_rs192770525S7 | DIAPH1 | rs111576333 | S5  | TMEM64     | 2.37E-06 | 1          | 1.30E-03 | 5.87E-14 | 2.39E-06    | 3.99E-10 |
| phe.Fasting_rs192770525S7 | DIAPH1 | rs112089881 | S8  | ZFAND4     | 2.04E-17 | 8.32E-10   | 1.43E-13 | 1.09E-09 | 0.0445256   | 2.58E-06 |
| phe.Fasting_rs192770525S7 | DIAPH1 | rs112091318 | S5  | TMEM64     | 7.32E-07 | 1          | 4.60E-04 | 3.91E-08 | 1           | 6.13E-05 |
| phe.Fasting_rs192770525S7 | DIAPH1 | rs114334325 | S7  | AP3M2      | 4.51E-15 | 1.84E-07   | 1.18E-11 | 3.87E-07 | 1           | 4.75E-04 |
| phe.Fasting_rs192770525S7 | DIAPH1 | rs114394395 | S7  | AP3M2      | 4.81E-15 | 1.97E-07   | 1.25E-11 | 3.87E-07 | 1           | 4.75E-04 |
| phe.Fasting_rs192770525S7 | DIAPH1 | rs114565620 | S8  | RCL1       | 1.82E-16 | 7.42E-09   | 6.37E-13 | 3.70E-08 | 1           | 5.84E-05 |
| phe.Fasting_rs192770525S7 | DIAPH1 | rs115083290 | S19 | NA         | 4.38E-16 | 1.79E-08   | 1.40E-12 | 1.42E-08 | 0.576679    | 2.53E-05 |
| phe.Fasting_rs192770525S7 | DIAPH1 | rs11524145  | S5  | CDK6       | 7.80E-07 | 1          | 4.86E-04 | 7.89E-06 | 1           | 6.69E-03 |
| phe.Fasting_rs192770525S7 | DIAPH1 | rs115752779 | S19 | NA         | 4.38E-16 | 1.79E-08   | 1.40E-12 | 1.42E-08 | 0.576679    | 2.53E-05 |

|                            |        |                |           |          |             |            |          |             |          |
|----------------------------|--------|----------------|-----------|----------|-------------|------------|----------|-------------|----------|
| phe.Fasting_rs192770525 S7 | DIAPH1 | rs115787552 S5 | KPNA3     | 2.97E-15 | 1.21E-07    | 8.14E-12   | 1.18E-13 | 4.80E-06    | 7.06E-10 |
| phe.Fasting_rs192770525 S7 | DIAPH1 | rs115888477 S8 | NA        | 2.03E-14 | 8.28E-07    | 5.02E-11   | 2.21E-14 | 8.99E-07    | 1.73E-10 |
| phe.Fasting_rs192770525 S7 | DIAPH1 | rs116011837 S9 | BRD2      | 4.89E-11 | 0.00199774  | 6.62E-08   | 4.07E-14 | 1.66E-06    | 2.85E-10 |
| phe.Fasting_rs192770525 S7 | DIAPH1 | rs116079984 S8 | KPNA3     | 2.97E-15 | 1.21E-07    | 8.14E-12   | 1.24E-13 | 5.04E-06    | 7.34E-10 |
| phe.Fasting_rs192770525 S7 | DIAPH1 | rs116120727 S9 | BRD2      | 4.89E-11 | 2.00E-03    | 6.62E-08   | 4.07E-14 | 1.66E-06    | 2.85E-10 |
| phe.Fasting_rs192770525 S7 | DIAPH1 | rs116406581 S2 | NA        | 1.81E-14 | 7.39E-07    | 4.52E-11   | 2.35E-07 | 1           | 3.05E-04 |
| phe.Fasting_rs192770525 S7 | DIAPH1 | rs116548615 S8 | TMEM45B   | 1.73E-16 | 7.06E-09    | 6.15E-13   | 8.70E-12 | 0.000354153 | 3.26E-08 |
| phe.Fasting_rs192770525 S7 | DIAPH1 | rs116696844 S3 | AP3M2     | 6.92E-15 | 2.83E-07    | 1.78E-11   | 3.87E-07 | 1           | 4.75E-04 |
| phe.Fasting_rs192770525 S7 | DIAPH1 | rs11989304 S4  | TMEM64    | 2.37E-06 | 1           | 0.00129547 | 6.78E-11 | 0.00276161  | 2.13E-07 |
| phe.Fasting_rs192770525 S7 | DIAPH1 | rs140524622 S7 | MRPL10    | 1.08E-16 | 4.41E-09    | 4.54E-13   | 7.35E-06 | 1           | 6.31E-03 |
| phe.Fasting_rs192770525 S7 | DIAPH1 | rs146815317 S5 | KPNA3     | 2.97E-15 | 1.21E-07    | 8.14E-12   | 1.18E-13 | 4.80E-06    | 7.06E-10 |
| phe.Fasting_rs192770525 S7 | DIAPH1 | rs150117838 S8 | KPNA3     | 2.97E-15 | 1.21E-07    | 8.14E-12   | 1.09E-13 | 4.44E-06    | 6.79E-10 |
| phe.Fasting_rs192770525 S7 | DIAPH1 | rs150916187 S4 | HIST1H2BK | 1.38E-05 | 1.00E+00    | 6.05E-03   | 1.37E-14 | 5.59E-07    | 1.16E-10 |
| phe.Fasting_rs192770525 S7 | DIAPH1 | rs16894241 S4  | HIST1H2BK | 1.99E-11 | 8.12E-04    | 2.96E-08   | 3.44E-14 | 1.40E-06    | 2.50E-10 |
| phe.Fasting_rs192770525 S7 | DIAPH1 | rs2032062 S8   | NA        | 1.22E-14 | 4.98E-07    | 3.09E-11   | 8.48E-06 | 1           | 7.14E-03 |
| phe.Fasting_rs192770525 S7 | DIAPH1 | rs2153597 S8   | ZNF438    | 5.51E-11 | 0.00224928  | 7.42E-08   | 4.52E-09 | 0.183916    | 9.08E-06 |
| phe.Fasting_rs192770525 S7 | DIAPH1 | rs2835656 S7   | TTC3      | 3.01E-10 | 0.0122766   | 3.60E-07   | 9.12E-06 | 1           | 7.57E-03 |
| phe.Fasting_rs192770525 S7 | DIAPH1 | rs34801978 S3  | HOXB2     | 1.23E-05 | 1           | 0.00545724 | 1.03E-08 | 0.419057    | 1.90E-05 |
| phe.Fasting_rs192770525 S7 | DIAPH1 | rs352346 S3    | GRPEL2    | 1.85E-11 | 0.000754995 | 2.78E-08   | 8.42E-06 | 1           | 7.10E-03 |
| phe.Fasting_rs192770525 S7 | DIAPH1 | rs3750898 S8   | DCLRE1A   | 2.29E-05 | 1           | 0.0093502  | 8.76E-06 | 1           | 7.32E-03 |
| phe.Fasting_rs192770525 S7 | DIAPH1 | rs4732511 S13  | POR       | 2.30E-15 | 9.39E-08    | 6.48E-12   | 9.65E-06 | 1           | 7.93E-03 |
| phe.Fasting_rs192770525 S7 | DIAPH1 | rs57503635 S3  | NA        | 6.34E-16 | 2.59E-08    | 1.95E-12   | 3.17E-14 | 1.29E-06    | 2.34E-10 |
| phe.Fasting_rs192770525 S7 | DIAPH1 | rs58905476 S7  | TTC3      | 3.29E-10 | 0.0134302   | 3.90E-07   | 9.79E-06 | 1           | 8.01E-03 |
| phe.Fasting_rs192770525 S7 | DIAPH1 | rs60011869 S16 | NA        | 1.04E-05 | 1           | 4.72E-03   | 8.16E-10 | 0.0332257   | 1.98E-06 |
| phe.Fasting_rs192770525 S7 | DIAPH1 | rs6964407 S7   | POR       | 7.55E-15 | 3.08E-07    | 1.94E-11   | 8.91E-06 | 1           | 7.43E-03 |
| phe.Fasting_rs192770525 S7 | DIAPH1 | rs7004597 S8   | NA        | 4.51E-15 | 1.84E-07    | 1.18E-11   | 2.34E-07 | 1           | 3.04E-04 |
| phe.Fasting_rs192770525 S7 | DIAPH1 | rs7256517 S7   | CYTH2     | 1.04E-15 | 4.24E-08    | 3.06E-12   | 4.82E-12 | 0.000196022 | 1.91E-08 |
| phe.Fasting_rs192770525 S7 | DIAPH1 | rs73283603 S7  | ZWINT     | 1.90E-06 | 1           | 0.0010688  | 2.03E-07 | 1           | 2.68E-04 |
| phe.Fasting_rs192770525 S7 | DIAPH1 | rs73392640 S8  | POLR3B    | 2.02E-10 | 8.26E-03    | 2.49E-07   | 5.19E-11 | 0.00211214  | 1.67E-07 |
| phe.Fasting_rs192770525 S7 | DIAPH1 | rs734069 S19   | NA        | 2.06E-08 | 8.39E-01    | 1.81E-05   | 6.71E-10 | 0.0272994   | 1.68E-06 |
| phe.Fasting_rs192770525 S7 | DIAPH1 | rs73619637 S8  | NA        | 1.44E-15 | 5.89E-08    | 4.14E-12   | 2.05E-10 | 0.00833668  | 5.78E-07 |
| phe.Fasting_rs192770525 S7 | DIAPH1 | rs74627895 S8  | TMEM64    | 7.32E-07 | 1.00E+00    | 4.60E-04   | 2.03E-08 | 0.828094    | 3.48E-05 |
| phe.Fasting_rs192770525 S7 | DIAPH1 | rs74914207 S24 | NA        | 1.37E-10 | 0.00558626  | 1.73E-07   | 9.12E-11 | 0.0037135   | 2.80E-07 |
| phe.Fasting_rs192770525 S7 | DIAPH1 | rs75350765 S5  | RCL1      | 1.82E-16 | 7.42E-09    | 6.37E-13   | 3.70E-08 | 1           | 5.84E-05 |
| phe.Fasting_rs192770525 S7 | DIAPH1 | rs75374128 S5  | CNTLN     | 1.47E-16 | 6.01E-09    | 5.72E-13   | 1.01E-07 | 1           | 1.42E-04 |
| phe.Fasting_rs192770525 S7 | DIAPH1 | rs75506779 S5  | TMCO3     | 5.55E-07 | 1.00E+00    | 3.61E-04   | 1.10E-08 | 0.449707    | 2.03E-05 |
| phe.Fasting_rs192770525 S7 | DIAPH1 | rs75758702 S24 | NA        | 7.02E-17 | 2.87E-09    | 3.16E-13   | 1.57E-10 | 0.00638323  | 4.59E-07 |
| phe.Fasting_rs192770525 S7 | DIAPH1 | rs75864203 S8  | CNTLN     | 1.47E-16 | 6.01E-09    | 5.72E-13   | 1.01E-07 | 1           | 1.42E-04 |
| phe.Fasting_rs192770525 S7 | DIAPH1 | rs75949566 S5  | TMEM64    | 2.76E-06 | 1.00E+00    | 1.47E-03   | 8.48E-11 | 0.00345267  | 2.62E-07 |
| phe.Fasting_rs192770525 S7 | DIAPH1 | rs76844308 S8  | CNTLN     | 7.68E-17 | 3.14E-09    | 3.41E-13   | 9.52E-08 | 1           | 1.35E-04 |

|                            |        |                 |            |          |          |          |          |             |          |
|----------------------------|--------|-----------------|------------|----------|----------|----------|----------|-------------|----------|
| phe.Fasting_rs192770525 S7 | DIAPH1 | rs7763107 S8    | FARS2      | 5.78E-16 | 2.36E-08 | 1.79E-12 | 9.23E-12 | 0.000375564 | 3.44E-08 |
| phe.Fasting_rs192770525 S7 | DIAPH1 | rs77798597 S7   | KPNA3      | 2.97E-15 | 1.21E-07 | 8.14E-12 | 1.09E-13 | 4.44E-06    | 6.79E-10 |
| phe.Fasting_rs192770525 S7 | DIAPH1 | rs77845645 S21  | NA         | 1.53E-06 | 1.00E+00 | 8.88E-04 | 4.20E-11 | 0.00170882  | 1.38E-07 |
| phe.Fasting_rs192770525 S7 | DIAPH1 | rs78353402 S8   | AP3M2      | 4.51E-15 | 1.84E-07 | 1.18E-11 | 3.87E-07 | 1           | 4.75E-04 |
| phe.Fasting_rs192770525 S7 | DIAPH1 | rs78516788 S8   | SLC38A1    | 2.75E-11 | 1.12E-03 | 3.94E-08 | 2.44E-10 | 0.00992686  | 6.74E-07 |
| phe.Fasting_rs192770525 S7 | DIAPH1 | rs78697063 S5   | MSI2       | 8.23E-19 | 3.36E-11 | 2.70E-14 | 6.84E-10 | 0.0278369   | 1.70E-06 |
| phe.Fasting_rs192770525 S7 | DIAPH1 | rs78722272 S5   | CNTLN      | 1.47E-16 | 6.01E-09 | 5.72E-13 | 1.05E-07 | 1           | 1.48E-04 |
| phe.Fasting_rs192770525 S7 | DIAPH1 | rs78736524 S5   | KPNA3      | 2.97E-15 | 1.21E-07 | 8.14E-12 | 1.18E-13 | 4.80E-06    | 7.06E-10 |
| phe.Fasting_rs192770525 S7 | DIAPH1 | rs78990344 S2   | LOC1005063 | 2.37E-06 | 1.00E+00 | 1.30E-03 | 6.78E-11 | 0.00276161  | 2.13E-07 |
| phe.Fasting_rs192770525 S7 | DIAPH1 | rs79781495 S8   | KPNA3      | 2.97E-15 | 1.21E-07 | 8.14E-12 | 1.09E-13 | 4.44E-06    | 6.79E-10 |
| phe.Fasting_rs192770525 S7 | DIAPH1 | rs79886603 S15  | NA         | 8.71E-08 | 1.00E+00 | 6.74E-05 | 4.66E-07 | 1           | 5.59E-04 |
| phe.Fasting_rs192770525 S7 | DIAPH1 | rs80200953 S8   | PPP2R5D    | 8.49E-17 | 3.47E-09 | 3.69E-13 | 3.65E-09 | 0.148399    | 7.55E-06 |
| phe.Fasting_rs192770525 S7 | DIAPH1 | rs80332465 S5   | KPNA3      | 3.13E-15 | 1.28E-07 | 8.51E-12 | 1.17E-13 | 4.77E-06    | 7.06E-10 |
| phe.Fasting_rs192770525 S7 | DIAPH1 | rs80334773 S5   | KPNA3      | 3.13E-15 | 1.28E-07 | 8.51E-12 | 1.17E-13 | 4.77E-06    | 7.06E-10 |
| phe.Fasting_rs1979789 S5   | TRAK1  | rs77845645 S21  | NA         | 3.46E-07 | 1.00E+00 | 2.36E-04 | 2.24E-07 | 1           | 2.93E-04 |
| phe.Fasting_rs2003969 S7   | SGSM2  | rs139070959 S8  | RPN2       | 2.61E-06 | 1.00E+00 | 1.41E-03 | 8.51E-06 | 1           | 7.15E-03 |
| phe.Fasting_rs2059970 S8   | PTK2B  | rs76844308 S8   | CNTLN      | 4.19E-06 | 1.00E+00 | 2.13E-03 | 6.93E-06 | 1           | 6.02E-03 |
| phe.Fasting_rs2133072 S8   | TRAK1  | rs77845645 S21  | NA         | 3.81E-07 | 1.00E+00 | 2.58E-04 | 2.01E-07 | 1           | 2.66E-04 |
| phe.Fasting_rs2153597 S8   | ZNF438 | rs114968018 S21 | NA         | 1.74E-07 | 1.00E+00 | 1.26E-04 | 3.40E-08 | 1           | 5.43E-05 |
| phe.Fasting_rs2153597 S8   | ZNF438 | rs115083290 S19 | NA         | 5.98E-09 | 2.44E-01 | 5.80E-06 | 4.41E-09 | 0.17949     | 8.97E-06 |
| phe.Fasting_rs2153597 S8   | ZNF438 | rs115752779 S19 | NA         | 5.98E-09 | 2.44E-01 | 5.80E-06 | 4.41E-09 | 0.17949     | 8.97E-06 |
| phe.Fasting_rs2153597 S8   | ZNF438 | rs12581352 S2   | NA         | 1.89E-05 | 1.00E+00 | 7.95E-03 | 1.94E-07 | 1           | 2.58E-04 |
| phe.Fasting_rs2241292 S8   | GPR160 | rs111576333 S5  | TMEM64     | 2.19E-08 | 8.92E-01 | 1.92E-05 | 7.29E-10 | 0.0296892   | 1.81E-06 |
| phe.Fasting_rs2241292 S8   | GPR160 | rs112091318 S5  | TMEM64     | 6.63E-09 | 2.71E-01 | 6.39E-06 | 1.13E-09 | 0.0459103   | 2.66E-06 |
| phe.Fasting_rs2241292 S8   | GPR160 | rs112348319 S8  | SPTLC1     | 1.95E-05 | 1.00E+00 | 8.18E-03 | 8.83E-10 | 0.0359593   | 2.13E-06 |
| phe.Fasting_rs2241292 S8   | GPR160 | rs112608164 S8  | SPTLC1     | 1.95E-05 | 1.00E+00 | 8.18E-03 | 8.83E-10 | 0.0359593   | 2.13E-06 |
| phe.Fasting_rs2241292 S8   | GPR160 | rs113568654 S12 | SPTLC1     | 1.87E-05 | 1.00E+00 | 7.87E-03 | 1.15E-08 | 0.467649    | 2.10E-05 |
| phe.Fasting_rs2241292 S8   | GPR160 | rs114565620 S8  | RCL1       | 2.99E-19 | 1.22E-11 | 2.40E-14 | 4.37E-07 | 1           | 5.29E-04 |
| phe.Fasting_rs2241292 S8   | GPR160 | rs115083290 S19 | NA         | 8.99E-08 | 1        | 6.93E-05 | 3.79E-09 | 0.154225    | 7.80E-06 |
| phe.Fasting_rs2241292 S8   | GPR160 | rs115752779 S19 | NA         | 8.99E-08 | 1        | 6.93E-05 | 3.79E-09 | 0.154225    | 7.80E-06 |
| phe.Fasting_rs2241292 S8   | GPR160 | rs115888477 S8  | NA         | 1.38E-06 | 1        | 8.10E-04 | 8.90E-11 | 0.00362223  | 2.74E-07 |
| phe.Fasting_rs2241292 S8   | GPR160 | rs116011837 S9  | BRD2       | 2.78E-13 | 1.13E-05 | 5.98E-10 | 2.39E-11 | 0.000974774 | 8.32E-08 |
| phe.Fasting_rs2241292 S8   | GPR160 | rs116120727 S9  | BRD2       | 2.78E-13 | 1.13E-05 | 5.98E-10 | 2.39E-11 | 0.000974774 | 8.32E-08 |
| phe.Fasting_rs2241292 S8   | GPR160 | rs116548615 S8  | TMEM45B    | 5.52E-19 | 2.26E-11 | 2.49E-14 | 2.50E-09 | 0.101963    | 5.40E-06 |
| phe.Fasting_rs2241292 S8   | GPR160 | rs11989304 S4   | TMEM64     | 2.19E-08 | 0.892331 | 1.92E-05 | 7.32E-10 | 0.0297886   | 1.81E-06 |
| phe.Fasting_rs2241292 S8   | GPR160 | rs140524622 S7  | MRPL10     | 2.33E-08 | 0.952839 | 2.04E-05 | 2.29E-06 | 1           | 2.34E-03 |
| phe.Fasting_rs2241292 S8   | GPR160 | rs141926074 S8  | ATE1       | 1.29E-19 | 5.27E-12 | 2.23E-14 | 1.52E-11 | 0.000620605 | 5.49E-08 |
| phe.Fasting_rs2241292 S8   | GPR160 | rs73392640 S8   | POLR3B     | 6.81E-08 | 1        | 5.42E-05 | 1.09E-05 | 1           | 8.78E-03 |
| phe.Fasting_rs2241292 S8   | GPR160 | rs74627895 S8   | TMEM64     | 6.63E-09 | 0.270691 | 6.39E-06 | 1.42E-06 | 1           | 1.54E-03 |
| phe.Fasting_rs2241292 S8   | GPR160 | rs75350765 S5   | RCL1       | 2.99E-19 | 1.22E-11 | 2.40E-14 | 4.37E-07 | 1           | 5.29E-04 |



|                       |    |        |             |     |               |          |          |             |          |           |          |
|-----------------------|----|--------|-------------|-----|---------------|----------|----------|-------------|----------|-----------|----------|
| phe.Fasting_rs2241292 | S8 | GPR160 | rs75506779  | S5  | TMCO3         | 8.13E-14 | 3.32E-06 | 1.86E-10    | 3.89E-06 | 1         | 3.67E-03 |
| phe.Fasting_rs2241292 | S8 | GPR160 | rs75949566  | S5  | TMEM64        | 2.39E-08 | 9.77E-01 | 2.09E-05    | 3.41E-10 | 0.0138701 | 9.06E-07 |
| phe.Fasting_rs2241292 | S8 | GPR160 | rs76542405  | S5  | SPTLC1        | 1.95E-05 | 1.00E+00 | 8.18E-03    | 8.83E-10 | 0.0359593 | 2.13E-06 |
| phe.Fasting_rs2241292 | S8 | GPR160 | rs77523818  | S7  | SPTLC1        | 1.95E-05 | 1.00E+00 | 8.18E-03    | 8.83E-10 | 0.0359593 | 2.13E-06 |
| phe.Fasting_rs2241292 | S8 | GPR160 | rs7763107   | S8  | FARS2         | 1.35E-09 | 5.49E-02 | 1.45E-06    | 3.12E-06 | 1         | 3.03E-03 |
| phe.Fasting_rs2241292 | S8 | GPR160 | rs77845645  | S21 | NA            | 1.04E-08 | 0.425406 | 9.68E-06    | 1.15E-12 | 4.68E-05  | 5.31E-09 |
| phe.Fasting_rs2241292 | S8 | GPR160 | rs78990344  | S2  | LOC10050631   | 2.19E-08 | 0.892331 | 1.92E-05    | 7.32E-10 | 0.0297886 | 1.81E-06 |
| phe.Fasting_rs2378138 | S5 | LIMS1  | rs112027720 | S7  | DIAPH1        | 2.28E-06 | 1        | 1.25E-03    | 4.44E-06 | 1         | 4.13E-03 |
| phe.Fasting_rs2378138 | S5 | LIMS1  | rs112940854 | S5  | MYO1B         | 1.51E-05 | 1        | 6.54E-03    | 7.68E-07 | 1         | 8.87E-04 |
| phe.Fasting_rs2378138 | S5 | LIMS1  | rs113219478 | S7  | DIAPH1        | 2.28E-06 | 1        | 0.00125419  | 4.44E-06 | 1         | 4.13E-03 |
| phe.Fasting_rs2378138 | S5 | LIMS1  | rs115888477 | S8  | NA            | 6.27E-07 | 1        | 0.000401339 | 5.31E-06 | 1         | 4.82E-03 |
| phe.Fasting_rs2378138 | S5 | LIMS1  | rs138090701 | S5  | HDAC3         | 1.01E-06 | 1        | 0.000610101 | 5.61E-06 | 1         | 5.03E-03 |
| phe.Fasting_rs2378138 | S5 | LIMS1  | rs138136869 | S7  | DIAPH1        | 6.02E-07 | 1        | 0.000387786 | 1.86E-06 | 1         | 1.94E-03 |
| phe.Fasting_rs2378138 | S5 | LIMS1  | rs138487229 | S11 | DIAPH1        | 2.28E-06 | 1        | 0.00125419  | 4.44E-06 | 1         | 4.13E-03 |
| phe.Fasting_rs2378138 | S5 | LIMS1  | rs138738950 | S8  | "PCDHGB2,PI   | 2.28E-06 | 1        | 0.00125419  | 4.43E-06 | 1         | 4.13E-03 |
| phe.Fasting_rs2378138 | S5 | LIMS1  | rs139297927 | S8  | DIAPH1        | 2.28E-06 | 1        | 0.00125419  | 4.44E-06 | 1         | 4.13E-03 |
| phe.Fasting_rs2378138 | S5 | LIMS1  | rs139337303 | S8  | DIAPH1        | 2.28E-06 | 1        | 0.00125419  | 4.44E-06 | 1         | 4.13E-03 |
| phe.Fasting_rs2378138 | S5 | LIMS1  | rs139403963 | S8  | DIAPH1        | 6.02E-07 | 1        | 0.000387786 | 1.86E-06 | 1         | 1.94E-03 |
| phe.Fasting_rs2378138 | S5 | LIMS1  | rs139621309 | S18 | "LOC100505063 | 2.28E-06 | 1        | 0.00125419  | 4.44E-06 | 1         | 4.13E-03 |
| phe.Fasting_rs2378138 | S5 | LIMS1  | rs139828110 | S8  | DIAPH1        | 6.02E-07 | 1        | 0.000387786 | 1.86E-06 | 1         | 1.94E-03 |
| phe.Fasting_rs2378138 | S5 | LIMS1  | rs140070363 | S8  | DIAPH1        | 2.28E-06 | 1        | 1.25E-03    | 4.44E-06 | 1         | 4.13E-03 |
| phe.Fasting_rs2378138 | S5 | LIMS1  | rs140644750 | S13 | DIAPH1        | 2.28E-06 | 1        | 0.00125419  | 4.44E-06 | 1         | 4.13E-03 |
| phe.Fasting_rs2378138 | S5 | LIMS1  | rs141022544 | S8  | DIAPH1        | 2.28E-06 | 1        | 0.00125419  | 4.44E-06 | 1         | 4.13E-03 |
| phe.Fasting_rs2378138 | S5 | LIMS1  | rs141525984 | S5  | DIAPH1        | 2.28E-06 | 1        | 0.00125419  | 4.44E-06 | 1         | 4.13E-03 |
| phe.Fasting_rs2378138 | S5 | LIMS1  | rs142480565 | S8  | DIAPH1        | 2.28E-06 | 1        | 0.00125419  | 4.44E-06 | 1         | 4.13E-03 |
| phe.Fasting_rs2378138 | S5 | LIMS1  | rs142718558 | S7  | "DIAPH1,LOC   | 2.28E-06 | 1.00E+00 | 1.25E-03    | 4.44E-06 | 1         | 4.13E-03 |
| phe.Fasting_rs2378138 | S5 | LIMS1  | rs142789100 | S8  | DIAPH1        | 6.02E-07 | 1        | 0.000387786 | 1.86E-06 | 1         | 1.94E-03 |
| phe.Fasting_rs2378138 | S5 | LIMS1  | rs142812798 | S7  | DIAPH1        | 6.02E-07 | 1        | 0.000387786 | 1.86E-06 | 1         | 1.94E-03 |
| phe.Fasting_rs2378138 | S5 | LIMS1  | rs143377827 | S13 | "DIAPH1,LOC   | 3.26E-07 | 1        | 0.000223509 | 1.40E-06 | 1         | 1.53E-03 |
| phe.Fasting_rs2378138 | S5 | LIMS1  | rs143691978 | S11 | DIAPH1        | 6.02E-07 | 1        | 0.000387786 | 1.91E-06 | 1         | 1.99E-03 |
| phe.Fasting_rs2378138 | S5 | LIMS1  | rs144081334 | S11 | DIAPH1        | 6.02E-07 | 1        | 0.000387786 | 1.91E-06 | 1         | 1.99E-03 |
| phe.Fasting_rs2378138 | S5 | LIMS1  | rs144613910 | S8  | DIAPH1        | 2.28E-06 | 1        | 0.00125419  | 4.44E-06 | 1         | 4.13E-03 |
| phe.Fasting_rs2378138 | S5 | LIMS1  | rs145027704 | S11 | DIAPH1        | 6.02E-07 | 1        | 3.88E-04    | 1.91E-06 | 1         | 1.99E-03 |
| phe.Fasting_rs2378138 | S5 | LIMS1  | rs146220673 | S7  | DIAPH1        | 2.28E-06 | 1        | 1.25E-03    | 4.44E-06 | 1         | 4.13E-03 |
| phe.Fasting_rs2378138 | S5 | LIMS1  | rs146622060 | S13 | DIAPH1        | 6.02E-07 | 1        | 3.88E-04    | 1.91E-06 | 1         | 1.99E-03 |
| phe.Fasting_rs2378138 | S5 | LIMS1  | rs146878162 | S7  | DIAPH1        | 2.28E-06 | 1        | 1.25E-03    | 4.44E-06 | 1         | 4.13E-03 |
| phe.Fasting_rs2378138 | S5 | LIMS1  | rs147314451 | S8  | DIAPH1        | 2.28E-06 | 1        | 1.25E-03    | 4.44E-06 | 1         | 4.13E-03 |
| phe.Fasting_rs2378138 | S5 | LIMS1  | rs147417996 | S7  | DIAPH1        | 6.02E-07 | 1.00E+00 | 3.88E-04    | 1.91E-06 | 1         | 1.99E-03 |
| phe.Fasting_rs2378138 | S5 | LIMS1  | rs147646948 | S7  | "LOC100505063 | 2.28E-06 | 1.00E+00 | 1.25E-03    | 4.44E-06 | 1         | 4.13E-03 |
| phe.Fasting_rs2378138 | S5 | LIMS1  | rs147677041 | S8  | DIAPH1        | 6.02E-07 | 1        | 3.88E-04    | 1.86E-06 | 1         | 1.94E-03 |

|                       |     |       |                |             |          |          |          |          |            |          |
|-----------------------|-----|-------|----------------|-------------|----------|----------|----------|----------|------------|----------|
| phe.Fasting_rs2378138 | S5  | LIMS1 | rs148116628S7  | DIAPH1      | 2.28E-06 | 1        | 1.25E-03 | 4.44E-06 | 1          | 4.13E-03 |
| phe.Fasting_rs2378138 | S5  | LIMS1 | rs148423011S7  | DIAPH1      | 2.28E-06 | 1        | 1.25E-03 | 4.44E-06 | 1          | 4.13E-03 |
| phe.Fasting_rs2378138 | S5  | LIMS1 | rs149019627S8  | DIAPH1      | 6.02E-07 | 1        | 3.88E-04 | 1.86E-06 | 1          | 1.94E-03 |
| phe.Fasting_rs2378138 | S5  | LIMS1 | rs149075406S8  | DIAPH1      | 2.28E-06 | 1        | 1.25E-03 | 4.44E-06 | 1          | 4.13E-03 |
| phe.Fasting_rs2378138 | S5  | LIMS1 | rs149334783S8  | DIAPH1      | 2.28E-06 | 1        | 1.25E-03 | 4.44E-06 | 1          | 4.13E-03 |
| phe.Fasting_rs2378138 | S5  | LIMS1 | rs149791570S5  | DIAPH1      | 6.02E-07 | 1        | 3.88E-04 | 1.86E-06 | 1          | 1.94E-03 |
| phe.Fasting_rs2378138 | S5  | LIMS1 | rs150452206S13 | "DIAPH1,LOC | 2.28E-06 | 1        | 1.25E-03 | 4.44E-06 | 1          | 4.13E-03 |
| phe.Fasting_rs2378138 | S5  | LIMS1 | rs150675915S7  | DIAPH1      | 2.28E-06 | 1        | 1.25E-03 | 4.44E-06 | 1          | 4.13E-03 |
| phe.Fasting_rs2378138 | S5  | LIMS1 | rs150765570S7  | DIAPH1      | 2.28E-06 | 1        | 1.25E-03 | 4.44E-06 | 1          | 4.13E-03 |
| phe.Fasting_rs2378138 | S5  | LIMS1 | rs150992994S11 | "PCDHGA5,Pi | 2.30E-06 | 1        | 1.26E-03 | 1.73E-06 | 1          | 1.83E-03 |
| phe.Fasting_rs2378138 | S5  | LIMS1 | rs151204700S8  | DIAPH1      | 2.28E-06 | 1        | 1.25E-03 | 4.44E-06 | 1          | 4.13E-03 |
| phe.Fasting_rs2378138 | S5  | LIMS1 | rs151330468S8  | DIAPH1      | 6.02E-07 | 1        | 3.88E-04 | 1.91E-06 | 1          | 1.99E-03 |
| phe.Fasting_rs2378138 | S5  | LIMS1 | rs16833551 S5  | MYO1B       | 1.60E-05 | 1        | 6.86E-03 | 1.28E-07 | 1          | 1.77E-04 |
| phe.Fasting_rs2378138 | S5  | LIMS1 | rs180772028S8  | "DIAPH1,LOC | 2.28E-06 | 1        | 1.25E-03 | 4.44E-06 | 1          | 4.13E-03 |
| phe.Fasting_rs2378138 | S5  | LIMS1 | rs181224861S7  | DIAPH1      | 2.28E-06 | 1        | 1.25E-03 | 4.44E-06 | 1          | 4.13E-03 |
| phe.Fasting_rs2378138 | S5  | LIMS1 | rs182714699S8  | DIAPH1      | 2.28E-06 | 1        | 1.25E-03 | 4.44E-06 | 1          | 4.13E-03 |
| phe.Fasting_rs2378138 | S5  | LIMS1 | rs182965141S8  | DIAPH1      | 6.91E-07 | 1        | 4.38E-04 | 1.22E-06 | 1          | 1.35E-03 |
| phe.Fasting_rs2378138 | S5  | LIMS1 | rs183597049S7  | DIAPH1      | 2.28E-06 | 1        | 1.25E-03 | 4.44E-06 | 1          | 4.13E-03 |
| phe.Fasting_rs2378138 | S5  | LIMS1 | rs183980988S2  | NA          | 2.28E-06 | 1        | 1.25E-03 | 4.44E-06 | 1          | 4.13E-03 |
| phe.Fasting_rs2378138 | S5  | LIMS1 | rs184233232S7  | DIAPH1      | 2.28E-06 | 1        | 1.25E-03 | 4.44E-06 | 1          | 4.13E-03 |
| phe.Fasting_rs2378138 | S5  | LIMS1 | rs184509477S13 | "PCDHGB4,Pi | 2.28E-06 | 1        | 1.25E-03 | 4.44E-06 | 1          | 4.13E-03 |
| phe.Fasting_rs2378138 | S5  | LIMS1 | rs185069296S15 | "LOC1005056 | 2.28E-06 | 1        | 1.25E-03 | 4.44E-06 | 1          | 4.13E-03 |
| phe.Fasting_rs2378138 | S5  | LIMS1 | rs185502834S8  | DIAPH1      | 6.02E-07 | 1        | 3.88E-04 | 1.86E-06 | 1          | 1.94E-03 |
| phe.Fasting_rs2378138 | S5  | LIMS1 | rs185759881S7  | DIAPH1      | 2.28E-06 | 1        | 1.25E-03 | 4.44E-06 | 1          | 4.13E-03 |
| phe.Fasting_rs2378138 | S5  | LIMS1 | rs187000011S11 | DIAPH1      | 2.28E-06 | 1        | 1.25E-03 | 4.44E-06 | 1          | 4.13E-03 |
| phe.Fasting_rs2378138 | S5  | LIMS1 | rs188981295S5  | "RPS27AP10, | 2.28E-06 | 1        | 1.25E-03 | 4.44E-06 | 1          | 4.13E-03 |
| phe.Fasting_rs2378138 | S5  | LIMS1 | rs190559574S7  | DIAPH1      | 6.02E-07 | 1        | 3.88E-04 | 1.86E-06 | 1          | 1.94E-03 |
| phe.Fasting_rs2378138 | S5  | LIMS1 | rs191544043S8  | DIAPH1      | 2.28E-06 | 1        | 1.25E-03 | 4.44E-06 | 1          | 4.13E-03 |
| phe.Fasting_rs2378138 | S5  | LIMS1 | rs191766712S7  | DIAPH1      | 2.28E-06 | 1        | 1.25E-03 | 4.44E-06 | 1          | 4.13E-03 |
| phe.Fasting_rs2378138 | S5  | LIMS1 | rs192690040S7  | DIAPH1      | 2.28E-06 | 1        | 1.25E-03 | 4.44E-06 | 1          | 4.13E-03 |
| phe.Fasting_rs2378138 | S5  | LIMS1 | rs192765219S7  | DIAPH1      | 2.28E-06 | 1        | 1.25E-03 | 4.44E-06 | 1          | 4.13E-03 |
| phe.Fasting_rs2378138 | S5  | LIMS1 | rs192770525S7  | DIAPH1      | 2.28E-06 | 1        | 1.25E-03 | 4.44E-06 | 1          | 4.13E-03 |
| phe.Fasting_rs2378138 | S5  | LIMS1 | rs35990401 S7  | DIAPH1      | 4.34E-06 | 1        | 2.20E-03 | 9.91E-07 | 1          | 1.12E-03 |
| phe.Fasting_rs2378138 | S5  | LIMS1 | rs55900860 S7  | DIAPH1      | 6.02E-07 | 1        | 3.88E-04 | 1.86E-06 | 1          | 1.94E-03 |
| phe.Fasting_rs2378138 | S5  | LIMS1 | rs61613048 S8  | MYO1B       | 1.82E-05 | 1        | 7.66E-03 | 3.97E-07 | 1          | 4.85E-04 |
| phe.Fasting_rs2378138 | S5  | LIMS1 | rs73058677 S5  | MYO1B       | 1.51E-05 | 1        | 6.54E-03 | 2.03E-07 | 1          | 2.68E-04 |
| phe.Fasting_rs2447099 | S7  | SGSM2 | rs139070959S8  | RPN2        | 2.67E-06 | 1        | 1.44E-03 | 8.88E-06 | 1          | 7.41E-03 |
| phe.Fasting_rs2616561 | S10 | VGLL4 | rs112027720S7  | DIAPH1      | 3.64E-09 | 0.148469 | 3.64E-06 | 8.99E-10 | 0.036585   | 2.15E-06 |
| phe.Fasting_rs2616561 | S10 | VGLL4 | rs113219478S7  | DIAPH1      | 3.64E-09 | 0.148469 | 3.64E-06 | 8.99E-10 | 0.036585   | 2.15E-06 |
| phe.Fasting_rs2616561 | S10 | VGLL4 | rs115083290S19 | NA          | 1.04E-05 | 1        | 4.72E-03 | 1.40E-10 | 0.00569301 | 4.20E-07 |

|              |           |     |       |             |     |             |          |           |          |          |            |          |
|--------------|-----------|-----|-------|-------------|-----|-------------|----------|-----------|----------|----------|------------|----------|
| phe.Fasting_ | rs2616561 | S10 | VGLL4 | rs115752779 | S19 | NA          | 1.04E-05 | 1         | 4.72E-03 | 1.40E-10 | 0.00569301 | 4.20E-07 |
| phe.Fasting_ | rs2616561 | S10 | VGLL4 | rs115888477 | S8  | NA          | 8.13E-08 | 1         | 6.32E-05 | 6.41E-06 | 1          | 5.63E-03 |
| phe.Fasting_ | rs2616561 | S10 | VGLL4 | rs116279995 | S20 | "PCDHGA4,PI | 1.07E-08 | 0.438137  | 9.94E-06 | 5.13E-10 | 0.0208944  | 1.33E-06 |
| phe.Fasting_ | rs2616561 | S10 | VGLL4 | rs138136869 | S7  | DIAPH1      | 7.69E-08 | 1         | 6.01E-05 | 7.50E-06 | 1          | 6.42E-03 |
| phe.Fasting_ | rs2616561 | S10 | VGLL4 | rs138457103 | S10 | DIAPH1      | 6.14E-08 | 1         | 4.94E-05 | 2.30E-09 | 0.0935667  | 5.00E-06 |
| phe.Fasting_ | rs2616561 | S10 | VGLL4 | rs138487229 | S11 | DIAPH1      | 3.64E-09 | 0.148469  | 3.64E-06 | 8.99E-10 | 0.036585   | 2.15E-06 |
| phe.Fasting_ | rs2616561 | S10 | VGLL4 | rs138738950 | S8  | "PCDHGB2,PI | 3.64E-09 | 0.148469  | 3.64E-06 | 9.05E-10 | 0.0368315  | 2.16E-06 |
| phe.Fasting_ | rs2616561 | S10 | VGLL4 | rs139297927 | S8  | DIAPH1      | 3.64E-09 | 0.148469  | 3.64E-06 | 8.99E-10 | 0.036585   | 2.15E-06 |
| phe.Fasting_ | rs2616561 | S10 | VGLL4 | rs139337303 | S8  | DIAPH1      | 3.64E-09 | 0.148469  | 3.64E-06 | 8.99E-10 | 0.036585   | 2.15E-06 |
| phe.Fasting_ | rs2616561 | S10 | VGLL4 | rs139403963 | S8  | DIAPH1      | 7.69E-08 | 1         | 6.01E-05 | 7.50E-06 | 1          | 6.42E-03 |
| phe.Fasting_ | rs2616561 | S10 | VGLL4 | rs139621309 | S18 | "LOC1005056 | 3.64E-09 | 0.148469  | 3.64E-06 | 8.99E-10 | 0.036585   | 2.15E-06 |
| phe.Fasting_ | rs2616561 | S10 | VGLL4 | rs139828110 | S8  | DIAPH1      | 7.69E-08 | 1         | 6.01E-05 | 7.50E-06 | 1          | 6.42E-03 |
| phe.Fasting_ | rs2616561 | S10 | VGLL4 | rs140070363 | S8  | DIAPH1      | 3.64E-09 | 0.148469  | 3.64E-06 | 8.99E-10 | 0.036585   | 2.15E-06 |
| phe.Fasting_ | rs2616561 | S10 | VGLL4 | rs140524622 | S7  | MRPL10      | 2.33E-09 | 0.0951658 | 2.42E-06 | 6.56E-06 | 1          | 5.74E-03 |
| phe.Fasting_ | rs2616561 | S10 | VGLL4 | rs140644750 | S13 | DIAPH1      | 3.64E-09 | 0.148469  | 3.64E-06 | 8.99E-10 | 0.036585   | 2.15E-06 |
| phe.Fasting_ | rs2616561 | S10 | VGLL4 | rs141022544 | S8  | DIAPH1      | 3.64E-09 | 0.148469  | 3.64E-06 | 8.99E-10 | 0.036585   | 2.15E-06 |
| phe.Fasting_ | rs2616561 | S10 | VGLL4 | rs141525984 | S5  | DIAPH1      | 3.64E-09 | 0.148469  | 3.64E-06 | 8.99E-10 | 0.036585   | 2.15E-06 |
| phe.Fasting_ | rs2616561 | S10 | VGLL4 | rs141692339 | S3  | "PCDHGA6,PI | 3.69E-10 | 0.0150824 | 4.32E-07 | 7.78E-10 | 0.0316579  | 1.92E-06 |
| phe.Fasting_ | rs2616561 | S10 | VGLL4 | rs141926074 | S8  | ATE1        | 1.12E-09 | 0.0458797 | 1.22E-06 | 1.85E-12 | 7.52E-05   | 8.08E-09 |
| phe.Fasting_ | rs2616561 | S10 | VGLL4 | rs142480565 | S8  | DIAPH1      | 3.64E-09 | 0.148469  | 3.64E-06 | 8.99E-10 | 0.036585   | 2.15E-06 |
| phe.Fasting_ | rs2616561 | S10 | VGLL4 | rs142718558 | S7  | "DIAPH1,LOC | 3.64E-09 | 0.148469  | 3.64E-06 | 8.99E-10 | 0.036585   | 2.15E-06 |
| phe.Fasting_ | rs2616561 | S10 | VGLL4 | rs142789100 | S8  | DIAPH1      | 7.69E-08 | 1         | 6.01E-05 | 7.50E-06 | 1          | 6.42E-03 |
| phe.Fasting_ | rs2616561 | S10 | VGLL4 | rs142812798 | S7  | DIAPH1      | 7.69E-08 | 1         | 6.01E-05 | 7.50E-06 | 1          | 6.42E-03 |
| phe.Fasting_ | rs2616561 | S10 | VGLL4 | rs143377827 | S13 | "DIAPH1,LOC | 5.85E-08 | 1         | 4.72E-05 | 2.56E-06 | 1          | 2.55E-03 |
| phe.Fasting_ | rs2616561 | S10 | VGLL4 | rs143691978 | S11 | DIAPH1      | 7.69E-08 | 1         | 6.01E-05 | 6.84E-06 | 1          | 5.95E-03 |
| phe.Fasting_ | rs2616561 | S10 | VGLL4 | rs144081334 | S11 | DIAPH1      | 7.69E-08 | 1         | 6.01E-05 | 6.84E-06 | 1          | 5.95E-03 |
| phe.Fasting_ | rs2616561 | S10 | VGLL4 | rs144613910 | S8  | DIAPH1      | 3.64E-09 | 0.148469  | 3.64E-06 | 8.99E-10 | 0.036585   | 2.15E-06 |
| phe.Fasting_ | rs2616561 | S10 | VGLL4 | rs145027704 | S11 | DIAPH1      | 7.69E-08 | 1         | 6.01E-05 | 6.84E-06 | 1          | 5.95E-03 |
| phe.Fasting_ | rs2616561 | S10 | VGLL4 | rs146220673 | S7  | DIAPH1      | 3.64E-09 | 0.148469  | 3.64E-06 | 8.99E-10 | 0.036585   | 2.15E-06 |
| phe.Fasting_ | rs2616561 | S10 | VGLL4 | rs146622060 | S13 | DIAPH1      | 7.69E-08 | 1         | 6.01E-05 | 6.84E-06 | 1          | 5.95E-03 |
| phe.Fasting_ | rs2616561 | S10 | VGLL4 | rs146878162 | S7  | DIAPH1      | 3.64E-09 | 0.148469  | 3.64E-06 | 8.99E-10 | 0.036585   | 2.15E-06 |
| phe.Fasting_ | rs2616561 | S10 | VGLL4 | rs147314451 | S8  | DIAPH1      | 3.64E-09 | 0.148469  | 3.64E-06 | 8.99E-10 | 0.036585   | 2.15E-06 |
| phe.Fasting_ | rs2616561 | S10 | VGLL4 | rs147417996 | S7  | DIAPH1      | 7.69E-08 | 1         | 6.01E-05 | 6.84E-06 | 1          | 5.95E-03 |
| phe.Fasting_ | rs2616561 | S10 | VGLL4 | rs147506725 | S21 | "PCDHGA1,PI | 1.07E-08 | 0.438137  | 9.94E-06 | 5.13E-10 | 0.0208944  | 1.33E-06 |
| phe.Fasting_ | rs2616561 | S10 | VGLL4 | rs147646948 | S7  | "LOC1005056 | 3.64E-09 | 0.148469  | 3.64E-06 | 8.99E-10 | 0.036585   | 2.15E-06 |
| phe.Fasting_ | rs2616561 | S10 | VGLL4 | rs147677041 | S8  | DIAPH1      | 7.69E-08 | 1         | 6.01E-05 | 7.50E-06 | 1          | 6.42E-03 |
| phe.Fasting_ | rs2616561 | S10 | VGLL4 | rs148116628 | S7  | DIAPH1      | 3.64E-09 | 0.148469  | 3.64E-06 | 8.99E-10 | 0.036585   | 2.15E-06 |
| phe.Fasting_ | rs2616561 | S10 | VGLL4 | rs148423011 | S7  | DIAPH1      | 3.64E-09 | 0.148469  | 3.64E-06 | 8.99E-10 | 0.036585   | 2.15E-06 |
| phe.Fasting_ | rs2616561 | S10 | VGLL4 | rs149019627 | S8  | DIAPH1      | 7.69E-08 | 1         | 6.01E-05 | 7.50E-06 | 1          | 6.42E-03 |
| phe.Fasting_ | rs2616561 | S10 | VGLL4 | rs149075406 | S8  | DIAPH1      | 3.64E-09 | 0.148469  | 3.64E-06 | 8.99E-10 | 0.036585   | 2.15E-06 |

|              |           |     |       |             |     |             |          |             |          |          |           |          |
|--------------|-----------|-----|-------|-------------|-----|-------------|----------|-------------|----------|----------|-----------|----------|
| phe.Fasting_ | rs2616561 | S10 | VGLL4 | rs149334783 | S8  | DIAPH1      | 3.64E-09 | 0.148469    | 3.64E-06 | 8.99E-10 | 0.036585  | 2.15E-06 |
| phe.Fasting_ | rs2616561 | S10 | VGLL4 | rs149553852 | S21 | "PCDHGA10,  | 1.07E-08 | 0.438137    | 9.94E-06 | 5.13E-10 | 0.0208944 | 1.33E-06 |
| phe.Fasting_ | rs2616561 | S10 | VGLL4 | rs149716949 | S5  | DIAPH1      | 1.65E-10 | 0.00674346  | 2.06E-07 | 1.62E-09 | 0.0657984 | 3.65E-06 |
| phe.Fasting_ | rs2616561 | S10 | VGLL4 | rs149791570 | S5  | DIAPH1      | 7.69E-08 | 1           | 6.01E-05 | 7.50E-06 | 1         | 6.42E-03 |
| phe.Fasting_ | rs2616561 | S10 | VGLL4 | rs150452206 | S13 | "DIAPH1,LOC | 3.64E-09 | 0.148469    | 3.64E-06 | 8.99E-10 | 0.036585  | 2.15E-06 |
| phe.Fasting_ | rs2616561 | S10 | VGLL4 | rs150675915 | S7  | DIAPH1      | 3.64E-09 | 0.148469    | 3.64E-06 | 8.99E-10 | 0.036585  | 2.15E-06 |
| phe.Fasting_ | rs2616561 | S10 | VGLL4 | rs150765570 | S7  | DIAPH1      | 3.64E-09 | 0.148469    | 3.64E-06 | 8.99E-10 | 0.036585  | 2.15E-06 |
| phe.Fasting_ | rs2616561 | S10 | VGLL4 | rs150992994 | S11 | "PCDHGA5,PI | 3.70E-09 | 0.151133    | 3.70E-06 | 8.47E-10 | 0.0344957 | 2.05E-06 |
| phe.Fasting_ | rs2616561 | S10 | VGLL4 | rs151204700 | S8  | DIAPH1      | 3.64E-09 | 0.148469    | 3.64E-06 | 8.99E-10 | 0.036585  | 2.15E-06 |
| phe.Fasting_ | rs2616561 | S10 | VGLL4 | rs151330468 | S8  | DIAPH1      | 7.69E-08 | 1           | 6.01E-05 | 6.84E-06 | 1         | 5.95E-03 |
| phe.Fasting_ | rs2616561 | S10 | VGLL4 | rs180772028 | S8  | "DIAPH1,LOC | 3.64E-09 | 0.148469    | 3.64E-06 | 8.99E-10 | 0.036585  | 2.15E-06 |
| phe.Fasting_ | rs2616561 | S10 | VGLL4 | rs181224861 | S7  | DIAPH1      | 3.64E-09 | 0.148469    | 3.64E-06 | 8.99E-10 | 0.036585  | 2.15E-06 |
| phe.Fasting_ | rs2616561 | S10 | VGLL4 | rs181247960 | S21 | "PCDHGA9,PI | 1.07E-08 | 0.438137    | 9.94E-06 | 5.13E-10 | 0.0208944 | 1.33E-06 |
| phe.Fasting_ | rs2616561 | S10 | VGLL4 | rs181824655 | S21 | "PCDHGB6,PI | 1.07E-08 | 0.438137    | 9.94E-06 | 5.13E-10 | 0.0208944 | 1.33E-06 |
| phe.Fasting_ | rs2616561 | S10 | VGLL4 | rs182714699 | S8  | DIAPH1      | 3.64E-09 | 0.148469    | 3.64E-06 | 8.99E-10 | 0.036585  | 2.15E-06 |
| phe.Fasting_ | rs2616561 | S10 | VGLL4 | rs182965141 | S8  | DIAPH1      | 8.49E-08 | 1           | 6.58E-05 | 1.21E-05 | 1         | 9.47E-03 |
| phe.Fasting_ | rs2616561 | S10 | VGLL4 | rs183597049 | S7  | DIAPH1      | 3.64E-09 | 0.148469    | 3.64E-06 | 8.99E-10 | 0.036585  | 2.15E-06 |
| phe.Fasting_ | rs2616561 | S10 | VGLL4 | rs183980988 | S2  | NA          | 3.64E-09 | 0.148469    | 3.64E-06 | 8.99E-10 | 0.036585  | 2.15E-06 |
| phe.Fasting_ | rs2616561 | S10 | VGLL4 | rs184233232 | S7  | DIAPH1      | 3.64E-09 | 0.148469    | 3.64E-06 | 8.99E-10 | 0.036585  | 2.15E-06 |
| phe.Fasting_ | rs2616561 | S10 | VGLL4 | rs184509477 | S13 | "PCDHGB4,PI | 3.64E-09 | 0.148469    | 3.64E-06 | 8.99E-10 | 0.036585  | 2.15E-06 |
| phe.Fasting_ | rs2616561 | S10 | VGLL4 | rs185069296 | S15 | "LOC1005056 | 3.64E-09 | 0.148469    | 3.64E-06 | 8.99E-10 | 0.036585  | 2.15E-06 |
| phe.Fasting_ | rs2616561 | S10 | VGLL4 | rs185502834 | S8  | DIAPH1      | 7.69E-08 | 1           | 6.01E-05 | 7.50E-06 | 1         | 6.42E-03 |
| phe.Fasting_ | rs2616561 | S10 | VGLL4 | rs185759881 | S7  | DIAPH1      | 3.64E-09 | 0.148469    | 3.64E-06 | 8.99E-10 | 0.036585  | 2.15E-06 |
| phe.Fasting_ | rs2616561 | S10 | VGLL4 | rs186288044 | S21 | "PCDHGB4,PI | 1.07E-08 | 0.438137    | 9.94E-06 | 5.13E-10 | 0.0208944 | 1.33E-06 |
| phe.Fasting_ | rs2616561 | S10 | VGLL4 | rs187000011 | S11 | DIAPH1      | 3.64E-09 | 0.148469    | 3.64E-06 | 8.99E-10 | 0.036585  | 2.15E-06 |
| phe.Fasting_ | rs2616561 | S10 | VGLL4 | rs188981295 | S5  | "RPS27AP10, | 3.64E-09 | 0.148469    | 3.64E-06 | 8.99E-10 | 0.036585  | 2.15E-06 |
| phe.Fasting_ | rs2616561 | S10 | VGLL4 | rs190559574 | S7  | DIAPH1      | 7.69E-08 | 1           | 6.01E-05 | 7.50E-06 | 1         | 6.42E-03 |
| phe.Fasting_ | rs2616561 | S10 | VGLL4 | rs191544043 | S8  | DIAPH1      | 3.64E-09 | 0.148469    | 3.64E-06 | 8.99E-10 | 0.036585  | 2.15E-06 |
| phe.Fasting_ | rs2616561 | S10 | VGLL4 | rs191766712 | S7  | DIAPH1      | 3.64E-09 | 0.148469    | 3.64E-06 | 8.99E-10 | 0.036585  | 2.15E-06 |
| phe.Fasting_ | rs2616561 | S10 | VGLL4 | rs192690040 | S7  | DIAPH1      | 3.64E-09 | 0.148469    | 3.64E-06 | 8.99E-10 | 0.036585  | 2.15E-06 |
| phe.Fasting_ | rs2616561 | S10 | VGLL4 | rs192765219 | S7  | DIAPH1      | 3.64E-09 | 0.148469    | 3.64E-06 | 8.99E-10 | 0.036585  | 2.15E-06 |
| phe.Fasting_ | rs2616561 | S10 | VGLL4 | rs192770525 | S7  | DIAPH1      | 3.64E-09 | 0.148469    | 3.64E-06 | 8.99E-10 | 0.036585  | 2.15E-06 |
| phe.Fasting_ | rs2616561 | S10 | VGLL4 | rs35990401  | S7  | DIAPH1      | 3.63E-09 | 0.148334    | 3.64E-06 | 3.30E-09 | 0.134488  | 6.94E-06 |
| phe.Fasting_ | rs2616561 | S10 | VGLL4 | rs55900860  | S7  | DIAPH1      | 7.69E-08 | 1           | 6.01E-05 | 7.50E-06 | 1         | 6.42E-03 |
| phe.Fasting_ | rs2616561 | S10 | VGLL4 | rs57503635  | S3  | NA          | 5.26E-09 | 0.214867    | 5.13E-06 | 1.65E-12 | 6.71E-05  | 7.33E-09 |
| phe.Fasting_ | rs2616561 | S10 | VGLL4 | rs60011869  | S16 | NA          | 9.80E-06 | 1           | 4.49E-03 | 5.04E-08 | 1         | 7.74E-05 |
| phe.Fasting_ | rs2616561 | S10 | VGLL4 | rs7256517   | S7  | CYTH2       | 3.01E-09 | 0.123043    | 3.07E-06 | 4.53E-07 | 1         | 5.46E-04 |
| phe.Fasting_ | rs2616561 | S10 | VGLL4 | rs73283603  | S7  | ZWINT       | 7.55E-06 | 1           | 3.58E-03 | 1.42E-07 | 1         | 1.94E-04 |
| phe.Fasting_ | rs2616561 | S10 | VGLL4 | rs75949566  | S5  | TMEM64      | 1.54E-11 | 0.000628632 | 2.36E-08 | 1.71E-06 | 1         | 1.80E-03 |
| phe.Fasting_ | rs2616561 | S10 | VGLL4 | rs79517926  | S15 | "DIAPH1,LOC | 8.11E-09 | 0.331132    | 7.71E-06 | 8.62E-07 | 1         | 9.87E-04 |

|                       |    |       |             |     |             |          |            |          |          |             |          |
|-----------------------|----|-------|-------------|-----|-------------|----------|------------|----------|----------|-------------|----------|
| phe.Fasting_rs2691611 | S8 | SNX13 | rs139070959 | S8  | RPN2        | 1.08E-06 | 1          | 6.47E-04 | 1.26E-05 | 1           | 9.78E-03 |
| phe.Fasting_rs2867314 | S5 | LUZP1 | rs112348319 | S8  | SPTLC1      | 2.51E-06 | 1          | 1.36E-03 | 3.64E-07 | 1           | 4.51E-04 |
| phe.Fasting_rs2867314 | S5 | LUZP1 | rs112608164 | S8  | SPTLC1      | 2.51E-06 | 1          | 1.36E-03 | 3.64E-07 | 1           | 4.51E-04 |
| phe.Fasting_rs2867314 | S5 | LUZP1 | rs113568654 | S12 | SPTLC1      | 2.32E-06 | 1          | 1.27E-03 | 2.76E-06 | 1           | 2.72E-03 |
| phe.Fasting_rs2867314 | S5 | LUZP1 | rs76542405  | S5  | SPTLC1      | 2.51E-06 | 1          | 1.36E-03 | 3.64E-07 | 1           | 4.51E-04 |
| phe.Fasting_rs2867314 | S5 | LUZP1 | rs77523818  | S7  | SPTLC1      | 2.51E-06 | 1          | 1.36E-03 | 3.64E-07 | 1           | 4.51E-04 |
| phe.Fasting_rs2924507 | S5 | ZC3H3 | rs114565620 | S8  | RCL1        | 2.92E-07 | 1          | 2.02E-04 | 7.02E-12 | 0.00028576  | 2.70E-08 |
| phe.Fasting_rs2924507 | S5 | ZC3H3 | rs139070959 | S8  | RPN2        | 1.38E-18 | 5.64E-11   | 3.38E-14 | 5.20E-15 | 2.12E-07    | 4.77E-11 |
| phe.Fasting_rs2924507 | S5 | ZC3H3 | rs145412529 | S8  | "RBL1,RPS3A | 7.67E-19 | 3.13E-11   | 2.70E-14 | 6.02E-15 | 2.45E-07    | 5.46E-11 |
| phe.Fasting_rs2924507 | S5 | ZC3H3 | rs75350765  | S5  | RCL1        | 2.92E-07 | 1          | 2.02E-04 | 7.02E-12 | 0.00028576  | 2.70E-08 |
| phe.Fasting_rs2924507 | S5 | ZC3H3 | rs75374128  | S5  | CNTLN       | 3.57E-11 | 0.00145818 | 4.97E-08 | 1.16E-05 | 1           | 9.15E-03 |
| phe.Fasting_rs2924507 | S5 | ZC3H3 | rs75864203  | S8  | CNTLN       | 3.57E-11 | 0.00145818 | 4.97E-08 | 1.16E-05 | 1           | 9.15E-03 |
| phe.Fasting_rs2924507 | S5 | ZC3H3 | rs76844308  | S8  | CNTLN       | 4.44E-13 | 1.81E-05   | 9.40E-10 | 6.92E-06 | 1           | 6.01E-03 |
| phe.Fasting_rs2924507 | S5 | ZC3H3 | rs78516788  | S8  | SLC38A1     | 1.03E-07 | 1          | 7.84E-05 | 2.03E-07 | 1           | 2.69E-04 |
| phe.Fasting_rs2924507 | S5 | ZC3H3 | rs78722272  | S5  | CNTLN       | 3.57E-11 | 0.00145818 | 4.97E-08 | 1.23E-05 | 1           | 9.59E-03 |
| phe.Fasting_rs2924507 | S5 | ZC3H3 | rs79886603  | S15 | NA          | 2.40E-06 | 1          | 1.31E-03 | 5.07E-07 | 1           | 6.05E-04 |
| phe.Fasting_rs2924508 | S8 | ZC3H3 | rs114565620 | S8  | RCL1        | 2.92E-07 | 1          | 2.02E-04 | 1.09E-11 | 0.000441829 | 4.01E-08 |
| phe.Fasting_rs2924508 | S8 | ZC3H3 | rs139070959 | S8  | RPN2        | 1.38E-18 | 5.64E-11   | 3.38E-14 | 6.31E-15 | 2.57E-07    | 5.71E-11 |
| phe.Fasting_rs2924508 | S8 | ZC3H3 | rs145412529 | S8  | "RBL1,RPS3A | 7.67E-19 | 3.13E-11   | 2.70E-14 | 7.32E-15 | 2.98E-07    | 6.50E-11 |
| phe.Fasting_rs2924508 | S8 | ZC3H3 | rs75350765  | S5  | RCL1        | 2.92E-07 | 1          | 2.02E-04 | 1.09E-11 | 0.000441829 | 4.01E-08 |
| phe.Fasting_rs2924508 | S8 | ZC3H3 | rs76844308  | S8  | CNTLN       | 4.44E-13 | 1.81E-05   | 9.40E-10 | 1.03E-05 | 1           | 8.39E-03 |
| phe.Fasting_rs2924508 | S8 | ZC3H3 | rs78516788  | S8  | SLC38A1     | 1.03E-07 | 1          | 7.84E-05 | 2.85E-07 | 1           | 3.62E-04 |
| phe.Fasting_rs2924508 | S8 | ZC3H3 | rs79886603  | S15 | NA          | 2.40E-06 | 1          | 1.31E-03 | 7.07E-07 | 1           | 8.23E-04 |
| phe.Fasting_rs2924511 | S7 | ZC3H3 | rs114565620 | S8  | RCL1        | 2.92E-07 | 1          | 2.02E-04 | 4.40E-12 | 0.000179273 | 1.76E-08 |
| phe.Fasting_rs2924511 | S7 | ZC3H3 | rs139070959 | S8  | RPN2        | 1.38E-18 | 5.64E-11   | 3.38E-14 | 5.09E-15 | 2.07E-07    | 4.69E-11 |
| phe.Fasting_rs2924511 | S7 | ZC3H3 | rs145412529 | S8  | "RBL1,RPS3A | 7.67E-19 | 3.13E-11   | 2.70E-14 | 5.88E-15 | 2.40E-07    | 5.36E-11 |
| phe.Fasting_rs2924511 | S7 | ZC3H3 | rs75350765  | S5  | RCL1        | 2.92E-07 | 1          | 2.02E-04 | 4.40E-12 | 0.000179273 | 1.76E-08 |
| phe.Fasting_rs2924511 | S7 | ZC3H3 | rs75374128  | S5  | CNTLN       | 3.57E-11 | 0.00145818 | 4.97E-08 | 8.69E-06 | 1           | 7.27E-03 |
| phe.Fasting_rs2924511 | S7 | ZC3H3 | rs75864203  | S8  | CNTLN       | 3.57E-11 | 0.00145818 | 4.97E-08 | 8.69E-06 | 1           | 7.27E-03 |
| phe.Fasting_rs2924511 | S7 | ZC3H3 | rs76844308  | S8  | CNTLN       | 4.44E-13 | 1.81E-05   | 9.40E-10 | 4.99E-06 | 1           | 4.56E-03 |
| phe.Fasting_rs2924511 | S7 | ZC3H3 | rs78516788  | S8  | SLC38A1     | 1.03E-07 | 1          | 7.84E-05 | 1.88E-07 | 1           | 2.50E-04 |
| phe.Fasting_rs2924511 | S7 | ZC3H3 | rs78722272  | S5  | CNTLN       | 3.57E-11 | 0.00145818 | 4.97E-08 | 9.27E-06 | 1           | 7.67E-03 |
| phe.Fasting_rs2924511 | S7 | ZC3H3 | rs79886603  | S15 | NA          | 2.40E-06 | 1          | 1.31E-03 | 3.77E-07 | 1           | 4.66E-04 |
| phe.Fasting_rs2924512 | S7 | ZC3H3 | rs114565620 | S8  | RCL1        | 3.20E-07 | 1          | 2.20E-04 | 6.12E-12 | 0.000248918 | 2.36E-08 |
| phe.Fasting_rs2924512 | S7 | ZC3H3 | rs139070959 | S8  | RPN2        | 1.57E-18 | 6.41E-11   | 3.60E-14 | 5.52E-15 | 2.25E-07    | 5.04E-11 |
| phe.Fasting_rs2924512 | S7 | ZC3H3 | rs145412529 | S8  | "RBL1,RPS3A | 8.77E-19 | 3.58E-11   | 2.75E-14 | 6.40E-15 | 2.61E-07    | 5.79E-11 |
| phe.Fasting_rs2924512 | S7 | ZC3H3 | rs75350765  | S5  | RCL1        | 3.20E-07 | 1          | 2.20E-04 | 6.12E-12 | 0.000248918 | 2.36E-08 |
| phe.Fasting_rs2924512 | S7 | ZC3H3 | rs78516788  | S8  | SLC38A1     | 1.27E-07 | 1          | 9.45E-05 | 1.86E-07 | 1           | 2.47E-04 |
| phe.Fasting_rs2924512 | S7 | ZC3H3 | rs79886603  | S15 | NA          | 2.70E-06 | 1          | 1.45E-03 | 4.58E-07 | 1           | 5.51E-04 |
| phe.Fasting_rs2956376 | S8 | ZC3H3 | rs114565620 | S8  | RCL1        | 2.92E-07 | 1          | 2.02E-04 | 2.75E-12 | 0.000112138 | 1.18E-08 |

|                        |    |        |                |             |          |            |             |          |             |          |
|------------------------|----|--------|----------------|-------------|----------|------------|-------------|----------|-------------|----------|
| phe.Fasting_rs2956376  | S8 | ZC3H3  | rs139070959S8  | RPN2        | 1.38E-18 | 5.64E-11   | 3.38E-14    | 4.19E-15 | 1.70E-07    | 3.90E-11 |
| phe.Fasting_rs2956376  | S8 | ZC3H3  | rs145412529S8  | "RBL1,RPS3A | 7.67E-19 | 3.13E-11   | 2.70E-14    | 4.82E-15 | 1.96E-07    | 4.46E-11 |
| phe.Fasting_rs2956376  | S8 | ZC3H3  | rs75350765 S5  | RCL1        | 2.92E-07 | 1          | 2.02E-04    | 2.75E-12 | 0.000112138 | 1.18E-08 |
| phe.Fasting_rs2956376  | S8 | ZC3H3  | rs75374128 S5  | CNTLN       | 3.57E-11 | 0.00145818 | 4.97E-08    | 5.35E-06 | 1           | 4.85E-03 |
| phe.Fasting_rs2956376  | S8 | ZC3H3  | rs75864203 S8  | CNTLN       | 3.57E-11 | 0.00145818 | 4.97E-08    | 5.35E-06 | 1           | 4.85E-03 |
| phe.Fasting_rs2956376  | S8 | ZC3H3  | rs76844308 S8  | CNTLN       | 4.44E-13 | 1.81E-05   | 9.40E-10    | 3.18E-06 | 1           | 3.08E-03 |
| phe.Fasting_rs2956376  | S8 | ZC3H3  | rs78516788 S8  | SLC38A1     | 1.03E-07 | 1          | 7.84E-05    | 1.29E-07 | 1           | 1.79E-04 |
| phe.Fasting_rs2956376  | S8 | ZC3H3  | rs78722272 S5  | CNTLN       | 3.57E-11 | 1.46E-03   | 4.97E-08    | 5.72E-06 | 1           | 5.11E-03 |
| phe.Fasting_rs2956376  | S8 | ZC3H3  | rs79886603 S15 | NA          | 2.40E-06 | 1.00E+00   | 1.31E-03    | 2.54E-07 | 1           | 3.27E-04 |
| phe.Fasting_rs2980270  | S7 | ZC3H3  | rs114565620S8  | RCL1        | 2.92E-07 | 1          | 0.000201845 | 2.75E-12 | 0.000112138 | 1.18E-08 |
| phe.Fasting_rs2980270  | S7 | ZC3H3  | rs139070959S8  | RPN2        | 1.38E-18 | 5.64E-11   | 3.38E-14    | 4.19E-15 | 1.70E-07    | 3.90E-11 |
| phe.Fasting_rs2980270  | S7 | ZC3H3  | rs145412529S8  | "RBL1,RPS3A | 7.67E-19 | 3.13E-11   | 2.70E-14    | 4.82E-15 | 1.96E-07    | 4.46E-11 |
| phe.Fasting_rs2980270  | S7 | ZC3H3  | rs75350765 S5  | RCL1        | 2.92E-07 | 1          | 0.000201845 | 2.75E-12 | 0.000112138 | 1.18E-08 |
| phe.Fasting_rs2980270  | S7 | ZC3H3  | rs75374128 S5  | CNTLN       | 3.57E-11 | 0.00145818 | 4.97E-08    | 5.35E-06 | 1           | 4.85E-03 |
| phe.Fasting_rs2980270  | S7 | ZC3H3  | rs75864203 S8  | CNTLN       | 3.57E-11 | 0.00145818 | 4.97E-08    | 5.35E-06 | 1           | 4.85E-03 |
| phe.Fasting_rs2980270  | S7 | ZC3H3  | rs76844308 S8  | CNTLN       | 4.44E-13 | 1.81E-05   | 9.40E-10    | 3.18E-06 | 1           | 3.08E-03 |
| phe.Fasting_rs2980270  | S7 | ZC3H3  | rs78516788 S8  | SLC38A1     | 1.03E-07 | 1          | 7.84E-05    | 1.29E-07 | 1           | 1.79E-04 |
| phe.Fasting_rs2980270  | S7 | ZC3H3  | rs78722272 S5  | CNTLN       | 3.57E-11 | 0.00145818 | 4.97E-08    | 5.72E-06 | 1           | 5.11E-03 |
| phe.Fasting_rs2980270  | S7 | ZC3H3  | rs79886603 S15 | NA          | 2.40E-06 | 1          | 0.00130558  | 2.54E-07 | 1           | 3.27E-04 |
| phe.Fasting_rs2980272  | S7 | ZC3H3  | rs114565620S8  | RCL1        | 3.20E-07 | 1          | 0.000219893 | 6.69E-12 | 0.000272492 | 2.58E-08 |
| phe.Fasting_rs2980272  | S7 | ZC3H3  | rs139070959S8  | RPN2        | 1.57E-18 | 6.41E-11   | 3.60E-14    | 5.95E-15 | 2.42E-07    | 5.41E-11 |
| phe.Fasting_rs2980272  | S7 | ZC3H3  | rs145412529S8  | "RBL1,RPS3A | 8.77E-19 | 3.58E-11   | 2.75E-14    | 6.86E-15 | 2.79E-07    | 6.13E-11 |
| phe.Fasting_rs2980272  | S7 | ZC3H3  | rs75350765 S5  | RCL1        | 3.20E-07 | 1          | 0.000219893 | 6.69E-12 | 0.000272492 | 2.58E-08 |
| phe.Fasting_rs2980272  | S7 | ZC3H3  | rs78516788 S8  | SLC38A1     | 1.27E-07 | 1          | 9.45E-05    | 1.98E-07 | 1           | 2.63E-04 |
| phe.Fasting_rs2980272  | S7 | ZC3H3  | rs79886603 S15 | NA          | 2.70E-06 | 1          | 0.00145028  | 4.81E-07 | 1           | 5.76E-04 |
| phe.Fasting_rs2980275  | S5 | ZC3H3  | rs114565620S8  | RCL1        | 2.92E-07 | 1          | 0.000201845 | 7.02E-12 | 0.00028576  | 2.70E-08 |
| phe.Fasting_rs2980275  | S5 | ZC3H3  | rs139070959S8  | RPN2        | 1.38E-18 | 5.64E-11   | 3.38E-14    | 5.20E-15 | 2.12E-07    | 4.77E-11 |
| phe.Fasting_rs2980275  | S5 | ZC3H3  | rs145412529S8  | "RBL1,RPS3A | 7.67E-19 | 3.13E-11   | 2.70E-14    | 6.02E-15 | 2.45E-07    | 5.46E-11 |
| phe.Fasting_rs2980275  | S5 | ZC3H3  | rs75350765 S5  | RCL1        | 2.92E-07 | 1          | 0.000201845 | 7.02E-12 | 0.00028576  | 2.70E-08 |
| phe.Fasting_rs2980275  | S5 | ZC3H3  | rs75374128 S5  | CNTLN       | 3.57E-11 | 0.00145818 | 4.97E-08    | 1.16E-05 | 1           | 9.15E-03 |
| phe.Fasting_rs2980275  | S5 | ZC3H3  | rs75864203 S8  | CNTLN       | 3.57E-11 | 0.00145818 | 4.97E-08    | 1.16E-05 | 1           | 9.15E-03 |
| phe.Fasting_rs2980275  | S5 | ZC3H3  | rs76844308 S8  | CNTLN       | 4.44E-13 | 1.81E-05   | 9.40E-10    | 6.92E-06 | 1           | 6.01E-03 |
| phe.Fasting_rs2980275  | S5 | ZC3H3  | rs78516788 S8  | SLC38A1     | 1.03E-07 | 1          | 7.84E-05    | 2.03E-07 | 1           | 2.69E-04 |
| phe.Fasting_rs2980275  | S5 | ZC3H3  | rs78722272 S5  | CNTLN       | 3.57E-11 | 0.00145818 | 4.97E-08    | 1.23E-05 | 1           | 9.59E-03 |
| phe.Fasting_rs2980275  | S5 | ZC3H3  | rs79886603 S15 | NA          | 2.40E-06 | 1          | 0.00130558  | 5.07E-07 | 1           | 6.05E-04 |
| phe.Fasting_rs3124237  | S8 | DAPK1  | rs141926074S8  | ATE1        | 3.67E-06 | 1          | 0.0018945   | 4.22E-10 | 0.0171684   | 1.11E-06 |
| phe.Fasting_rs34157687 | S8 | FANCD2 | rs112027720S7  | DIAPH1      | 4.36E-07 | 1          | 0.000289116 | 1.62E-06 | 1           | 1.72E-03 |
| phe.Fasting_rs34157687 | S8 | FANCD2 | rs113219478S7  | DIAPH1      | 4.36E-07 | 1          | 0.000289116 | 1.62E-06 | 1           | 1.72E-03 |
| phe.Fasting_rs34157687 | S8 | FANCD2 | rs116279995S20 | "PCDHGA4,PI | 6.20E-07 | 1          | 0.000397692 | 3.53E-06 | 1           | 3.38E-03 |
| phe.Fasting_rs34157687 | S8 | FANCD2 | rs138090701S5  | HDAC3       | 9.73E-07 | 1          | 0.000591548 | 5.73E-06 | 1           | 5.12E-03 |

|                        |    |        |                |              |          |          |             |          |   |          |
|------------------------|----|--------|----------------|--------------|----------|----------|-------------|----------|---|----------|
| phe.Fasting_rs34157687 | S8 | FANCD2 | rs138136869S7  | DIAPH1       | 7.49E-08 | 1        | 5.87E-05    | 2.85E-07 | 1 | 3.62E-04 |
| phe.Fasting_rs34157687 | S8 | FANCD2 | rs138457103S10 | DIAPH1       | 2.44E-07 | 1        | 0.00017071  | 1.37E-06 | 1 | 1.49E-03 |
| phe.Fasting_rs34157687 | S8 | FANCD2 | rs138487229S11 | DIAPH1       | 4.36E-07 | 1        | 0.000289116 | 1.62E-06 | 1 | 1.72E-03 |
| phe.Fasting_rs34157687 | S8 | FANCD2 | rs138738950S8  | "PCDHGB2,Pi  | 4.36E-07 | 1        | 0.000289116 | 1.61E-06 | 1 | 1.71E-03 |
| phe.Fasting_rs34157687 | S8 | FANCD2 | rs139297927S8  | DIAPH1       | 4.36E-07 | 1        | 0.000289116 | 1.62E-06 | 1 | 1.72E-03 |
| phe.Fasting_rs34157687 | S8 | FANCD2 | rs139337303S8  | DIAPH1       | 4.36E-07 | 1        | 0.000289116 | 1.62E-06 | 1 | 1.72E-03 |
| phe.Fasting_rs34157687 | S8 | FANCD2 | rs139403963S8  | DIAPH1       | 7.49E-08 | 1        | 5.87E-05    | 2.85E-07 | 1 | 3.62E-04 |
| phe.Fasting_rs34157687 | S8 | FANCD2 | rs139621309S18 | "LOC1005056  | 4.36E-07 | 1        | 0.000289116 | 1.62E-06 | 1 | 1.72E-03 |
| phe.Fasting_rs34157687 | S8 | FANCD2 | rs139828110S8  | DIAPH1       | 7.49E-08 | 1        | 5.87E-05    | 2.85E-07 | 1 | 3.62E-04 |
| phe.Fasting_rs34157687 | S8 | FANCD2 | rs140070363S8  | DIAPH1       | 4.36E-07 | 1        | 0.000289116 | 1.62E-06 | 1 | 1.72E-03 |
| phe.Fasting_rs34157687 | S8 | FANCD2 | rs140644750S13 | DIAPH1       | 4.36E-07 | 1        | 0.000289116 | 1.62E-06 | 1 | 1.72E-03 |
| phe.Fasting_rs34157687 | S8 | FANCD2 | rs141022544S8  | DIAPH1       | 4.36E-07 | 1        | 0.000289116 | 1.62E-06 | 1 | 1.72E-03 |
| phe.Fasting_rs34157687 | S8 | FANCD2 | rs141525984S5  | DIAPH1       | 4.36E-07 | 1        | 0.000289116 | 1.62E-06 | 1 | 1.72E-03 |
| phe.Fasting_rs34157687 | S8 | FANCD2 | rs141692339S3  | "PCDHGA6,Pi  | 8.21E-07 | 1        | 0.000508152 | 5.19E-06 | 1 | 4.72E-03 |
| phe.Fasting_rs34157687 | S8 | FANCD2 | rs141926074S8  | ATE1         | 2.88E-07 | 1        | 0.000199324 | 2.16E-06 | 1 | 2.21E-03 |
| phe.Fasting_rs34157687 | S8 | FANCD2 | rs142480565S8  | DIAPH1       | 4.36E-07 | 1        | 0.000289116 | 1.62E-06 | 1 | 1.72E-03 |
| phe.Fasting_rs34157687 | S8 | FANCD2 | rs142718558S7  | "DIAPH1,LOC  | 4.36E-07 | 1        | 0.000289116 | 1.62E-06 | 1 | 1.72E-03 |
| phe.Fasting_rs34157687 | S8 | FANCD2 | rs142789100S8  | DIAPH1       | 7.49E-08 | 1        | 5.87E-05    | 2.85E-07 | 1 | 3.62E-04 |
| phe.Fasting_rs34157687 | S8 | FANCD2 | rs142812798S7  | DIAPH1       | 7.49E-08 | 1        | 5.87E-05    | 2.85E-07 | 1 | 3.62E-04 |
| phe.Fasting_rs34157687 | S8 | FANCD2 | rs143377827S13 | "DIAPH1,LOC  | 8.22E-08 | 1        | 6.39E-05    | 2.35E-07 | 1 | 3.05E-04 |
| phe.Fasting_rs34157687 | S8 | FANCD2 | rs143691978S11 | DIAPH1       | 7.49E-08 | 1        | 5.87E-05    | 2.97E-07 | 1 | 3.76E-04 |
| phe.Fasting_rs34157687 | S8 | FANCD2 | rs144081334S11 | DIAPH1       | 7.49E-08 | 1        | 5.87E-05    | 2.97E-07 | 1 | 3.76E-04 |
| phe.Fasting_rs34157687 | S8 | FANCD2 | rs144613910S8  | DIAPH1       | 4.36E-07 | 1.00E+00 | 2.89E-04    | 1.62E-06 | 1 | 1.72E-03 |
| phe.Fasting_rs34157687 | S8 | FANCD2 | rs145027704S11 | DIAPH1       | 7.49E-08 | 1        | 5.87E-05    | 2.97E-07 | 1 | 3.76E-04 |
| phe.Fasting_rs34157687 | S8 | FANCD2 | rs146220673S7  | DIAPH1       | 4.36E-07 | 1        | 0.000289116 | 1.62E-06 | 1 | 1.72E-03 |
| phe.Fasting_rs34157687 | S8 | FANCD2 | rs146622060S13 | DIAPH1       | 7.49E-08 | 1        | 5.87E-05    | 2.97E-07 | 1 | 3.76E-04 |
| phe.Fasting_rs34157687 | S8 | FANCD2 | rs146878162S7  | DIAPH1       | 4.36E-07 | 1        | 0.000289116 | 1.62E-06 | 1 | 1.72E-03 |
| phe.Fasting_rs34157687 | S8 | FANCD2 | rs147314451S8  | DIAPH1       | 4.36E-07 | 1        | 0.000289116 | 1.62E-06 | 1 | 1.72E-03 |
| phe.Fasting_rs34157687 | S8 | FANCD2 | rs147417996S7  | DIAPH1       | 7.49E-08 | 1.00E+00 | 5.87E-05    | 2.97E-07 | 1 | 3.76E-04 |
| phe.Fasting_rs34157687 | S8 | FANCD2 | rs147506725S21 | "PCDHGA1,Pi  | 6.20E-07 | 1        | 3.98E-04    | 3.53E-06 | 1 | 3.38E-03 |
| phe.Fasting_rs34157687 | S8 | FANCD2 | rs147646948S7  | "LOC1005056  | 4.36E-07 | 1        | 0.000289116 | 1.62E-06 | 1 | 1.72E-03 |
| phe.Fasting_rs34157687 | S8 | FANCD2 | rs147677041S8  | DIAPH1       | 7.49E-08 | 1.00E+00 | 5.87E-05    | 2.85E-07 | 1 | 3.62E-04 |
| phe.Fasting_rs34157687 | S8 | FANCD2 | rs148116628S7  | DIAPH1       | 4.36E-07 | 1.00E+00 | 2.89E-04    | 1.62E-06 | 1 | 1.72E-03 |
| phe.Fasting_rs34157687 | S8 | FANCD2 | rs148423011S7  | DIAPH1       | 4.36E-07 | 1.00E+00 | 2.89E-04    | 1.62E-06 | 1 | 1.72E-03 |
| phe.Fasting_rs34157687 | S8 | FANCD2 | rs149019627S8  | DIAPH1       | 7.49E-08 | 1.00E+00 | 5.87E-05    | 2.85E-07 | 1 | 3.62E-04 |
| phe.Fasting_rs34157687 | S8 | FANCD2 | rs149075406S8  | DIAPH1       | 4.36E-07 | 1        | 0.000289116 | 1.62E-06 | 1 | 1.72E-03 |
| phe.Fasting_rs34157687 | S8 | FANCD2 | rs149334783S8  | DIAPH1       | 4.36E-07 | 1        | 0.000289116 | 1.62E-06 | 1 | 1.72E-03 |
| phe.Fasting_rs34157687 | S8 | FANCD2 | rs149553852S21 | "PCDHGA10,Pi | 6.20E-07 | 1        | 0.000397692 | 3.53E-06 | 1 | 3.38E-03 |
| phe.Fasting_rs34157687 | S8 | FANCD2 | rs149716949S5  | DIAPH1       | 4.70E-08 | 1        | 3.87E-05    | 3.17E-07 | 1 | 3.99E-04 |
| phe.Fasting_rs34157687 | S8 | FANCD2 | rs149791570S5  | DIAPH1       | 7.49E-08 | 1        | 5.87E-05    | 2.85E-07 | 1 | 3.62E-04 |

|                        |    |            |             |     |             |          |          |             |          |           |          |
|------------------------|----|------------|-------------|-----|-------------|----------|----------|-------------|----------|-----------|----------|
| phe.Fasting_rs34157687 | S8 | FANCD2     | rs150452206 | S13 | "DIAPH1,LOC | 4.36E-07 | 1        | 0.000289116 | 1.62E-06 | 1         | 1.72E-03 |
| phe.Fasting_rs34157687 | S8 | FANCD2     | rs150675915 | S7  | DIAPH1      | 4.36E-07 | 1        | 0.000289116 | 1.62E-06 | 1         | 1.72E-03 |
| phe.Fasting_rs34157687 | S8 | FANCD2     | rs150765570 | S7  | DIAPH1      | 4.36E-07 | 1        | 0.000289116 | 1.62E-06 | 1         | 1.72E-03 |
| phe.Fasting_rs34157687 | S8 | FANCD2     | rs150992994 | S11 | "PCDHGA5,PI | 4.50E-07 | 1        | 0.000297756 | 1.56E-06 | 1         | 1.66E-03 |
| phe.Fasting_rs34157687 | S8 | FANCD2     | rs151204700 | S8  | DIAPH1      | 4.36E-07 | 1        | 0.000289116 | 1.62E-06 | 1         | 1.72E-03 |
| phe.Fasting_rs34157687 | S8 | FANCD2     | rs151330468 | S8  | DIAPH1      | 7.49E-08 | 1        | 5.87E-05    | 2.97E-07 | 1         | 3.76E-04 |
| phe.Fasting_rs34157687 | S8 | FANCD2     | rs180772028 | S8  | "DIAPH1,LOC | 4.36E-07 | 1        | 0.000289116 | 1.62E-06 | 1         | 1.72E-03 |
| phe.Fasting_rs34157687 | S8 | FANCD2     | rs181224861 | S7  | DIAPH1      | 4.36E-07 | 1        | 0.000289116 | 1.62E-06 | 1         | 1.72E-03 |
| phe.Fasting_rs34157687 | S8 | FANCD2     | rs181247960 | S21 | "PCDHGA9,PI | 6.20E-07 | 1        | 0.000397692 | 3.53E-06 | 1         | 3.38E-03 |
| phe.Fasting_rs34157687 | S8 | FANCD2     | rs181824655 | S21 | "PCDHGB6,PI | 6.20E-07 | 1        | 0.000397692 | 3.53E-06 | 1         | 3.38E-03 |
| phe.Fasting_rs34157687 | S8 | FANCD2     | rs182714699 | S8  | DIAPH1      | 4.36E-07 | 1        | 0.000289116 | 1.62E-06 | 1         | 1.72E-03 |
| phe.Fasting_rs34157687 | S8 | FANCD2     | rs182958142 | S8  | DIAPH1      | 2.15E-07 | 1        | 0.0001523   | 5.72E-06 | 1         | 5.11E-03 |
| phe.Fasting_rs34157687 | S8 | FANCD2     | rs182965141 | S8  | DIAPH1      | 8.44E-08 | 1        | 6.55E-05    | 3.00E-06 | 1         | 2.92E-03 |
| phe.Fasting_rs34157687 | S8 | FANCD2     | rs183597049 | S7  | DIAPH1      | 4.36E-07 | 1        | 0.000289116 | 1.62E-06 | 1         | 1.72E-03 |
| phe.Fasting_rs34157687 | S8 | FANCD2     | rs183980988 | S2  | NA          | 4.36E-07 | 1        | 0.000289116 | 1.62E-06 | 1         | 1.72E-03 |
| phe.Fasting_rs34157687 | S8 | FANCD2     | rs184233232 | S7  | DIAPH1      | 4.36E-07 | 1        | 0.000289116 | 1.62E-06 | 1         | 1.72E-03 |
| phe.Fasting_rs34157687 | S8 | FANCD2     | rs184509477 | S13 | "PCDHGB4,PI | 4.36E-07 | 1        | 0.000289116 | 1.62E-06 | 1         | 1.72E-03 |
| phe.Fasting_rs34157687 | S8 | FANCD2     | rs185069296 | S15 | "LOC1005056 | 4.36E-07 | 1        | 0.000289116 | 1.62E-06 | 1         | 1.72E-03 |
| phe.Fasting_rs34157687 | S8 | FANCD2     | rs185502834 | S8  | DIAPH1      | 7.49E-08 | 1        | 5.87E-05    | 2.85E-07 | 1         | 3.62E-04 |
| phe.Fasting_rs34157687 | S8 | FANCD2     | rs185759881 | S7  | DIAPH1      | 4.36E-07 | 1        | 0.000289116 | 1.62E-06 | 1         | 1.72E-03 |
| phe.Fasting_rs34157687 | S8 | FANCD2     | rs186288044 | S21 | "PCDHGB4,PI | 6.20E-07 | 1        | 0.000397692 | 3.53E-06 | 1         | 3.38E-03 |
| phe.Fasting_rs34157687 | S8 | FANCD2     | rs187000011 | S11 | DIAPH1      | 4.36E-07 | 1        | 0.000289116 | 1.62E-06 | 1         | 1.72E-03 |
| phe.Fasting_rs34157687 | S8 | FANCD2     | rs188981295 | S5  | "RPS27AP10, | 4.36E-07 | 1        | 0.000289116 | 1.62E-06 | 1         | 1.72E-03 |
| phe.Fasting_rs34157687 | S8 | FANCD2     | rs190559574 | S7  | DIAPH1      | 7.49E-08 | 1        | 5.87E-05    | 2.85E-07 | 1         | 3.62E-04 |
| phe.Fasting_rs34157687 | S8 | FANCD2     | rs191544043 | S8  | DIAPH1      | 4.36E-07 | 1        | 0.000289116 | 1.62E-06 | 1         | 1.72E-03 |
| phe.Fasting_rs34157687 | S8 | FANCD2     | rs191766712 | S7  | DIAPH1      | 4.36E-07 | 1        | 0.000289116 | 1.62E-06 | 1         | 1.72E-03 |
| phe.Fasting_rs34157687 | S8 | FANCD2     | rs192690040 | S7  | DIAPH1      | 4.36E-07 | 1        | 0.000289116 | 1.62E-06 | 1         | 1.72E-03 |
| phe.Fasting_rs34157687 | S8 | FANCD2     | rs192765219 | S7  | DIAPH1      | 4.36E-07 | 1        | 0.000289116 | 1.62E-06 | 1         | 1.72E-03 |
| phe.Fasting_rs34157687 | S8 | FANCD2     | rs192770525 | S7  | DIAPH1      | 4.36E-07 | 1        | 0.000289116 | 1.62E-06 | 1         | 1.72E-03 |
| phe.Fasting_rs34157687 | S8 | FANCD2     | rs35990401  | S7  | DIAPH1      | 3.35E-07 | 1        | 0.000229529 | 5.65E-07 | 1         | 6.69E-04 |
| phe.Fasting_rs34157687 | S8 | FANCD2     | rs3856797   | S12 | VGLL4       | 1.22E-05 | 1        | 0.00541401  | 6.19E-07 | 1         | 7.28E-04 |
| phe.Fasting_rs34157687 | S8 | FANCD2     | rs55900860  | S7  | DIAPH1      | 7.49E-08 | 1        | 5.87E-05    | 2.85E-07 | 1         | 3.62E-04 |
| phe.Fasting_rs34157687 | S8 | FANCD2     | rs57503635  | S3  | NA          | 3.60E-09 | 0.147212 | 3.63E-06    | 4.64E-17 | 1.89E-09  | 3.64E-12 |
| phe.Fasting_rs34157687 | S8 | FANCD2     | rs79517926  | S15 | "DIAPH1,LOC | 1.06E-07 | 1        | 8.00E-05    | 2.93E-06 | 1         | 2.87E-03 |
| phe.Fasting_rs34426187 | S8 | UBE2W      | rs139070959 | S8  | RPN2        | 1.16E-06 | 1        | 0.000694491 | 1.96E-07 | 1         | 2.60E-04 |
| phe.Fasting_rs34426187 | S8 | UBE2W      | rs145412529 | S8  | "RBL1,RPS3A | 5.98E-07 | 1        | 0.000385566 | 1.37E-06 | 1         | 1.50E-03 |
| phe.Fasting_rs34665390 | S7 | COPG2      | rs116079984 | S8  | KPNA3       | 5.27E-06 | 1        | 0.00260564  | 6.85E-10 | 0.0278995 | 1.71E-06 |
| phe.Fasting_rs34665390 | S7 | COPG2      | rs74627895  | S8  | TMEM64      | 1.77E-10 | 7.23E-03 | 2.21E-07    | 8.82E-06 | 1         | 7.36E-03 |
| phe.Fasting_rs34801978 | S3 | HOXB2      | rs73619637  | S8  | NA          | 1.77E-05 | 1.00E+00 | 7.48E-03    | 1.01E-07 | 1         | 1.42E-04 |
| phe.Fasting_rs35585404 | S7 | "FANCD2OS, | rs112027720 | S7  | DIAPH1      | 4.36E-07 | 1.00E+00 | 2.89E-04    | 1.54E-06 | 1         | 1.65E-03 |



|                        |    |                            |             |          |          |             |          |   |          |
|------------------------|----|----------------------------|-------------|----------|----------|-------------|----------|---|----------|
| phe.Fasting_rs35585404 | S7 | "FANCD2OS,Irs113219478 S7  | DIAPH1      | 4.36E-07 | 1.00E+00 | 2.89E-04    | 1.54E-06 | 1 | 1.65E-03 |
| phe.Fasting_rs35585404 | S7 | "FANCD2OS,Irs116279995 S20 | "PCDHGA4,Pi | 6.20E-07 | 1.00E+00 | 3.98E-04    | 3.33E-06 | 1 | 3.20E-03 |
| phe.Fasting_rs35585404 | S7 | "FANCD2OS,Irs138090701 S5  | HDAC3       | 9.73E-07 | 1.00E+00 | 5.92E-04    | 5.43E-06 | 1 | 4.91E-03 |
| phe.Fasting_rs35585404 | S7 | "FANCD2OS,Irs138136869 S7  | DIAPH1      | 7.49E-08 | 1.00E+00 | 5.87E-05    | 2.68E-07 | 1 | 3.43E-04 |
| phe.Fasting_rs35585404 | S7 | "FANCD2OS,Irs138457103 S10 | DIAPH1      | 2.44E-07 | 1.00E+00 | 1.71E-04    | 1.29E-06 | 1 | 1.42E-03 |
| phe.Fasting_rs35585404 | S7 | "FANCD2OS,Irs138487229 S11 | DIAPH1      | 4.36E-07 | 1.00E+00 | 2.89E-04    | 1.54E-06 | 1 | 1.65E-03 |
| phe.Fasting_rs35585404 | S7 | "FANCD2OS,Irs138738950 S8  | "PCDHGB2,Pi | 4.36E-07 | 1.00E+00 | 2.89E-04    | 1.52E-06 | 1 | 1.64E-03 |
| phe.Fasting_rs35585404 | S7 | "FANCD2OS,Irs139297927 S8  | DIAPH1      | 4.36E-07 | 1.00E+00 | 2.89E-04    | 1.54E-06 | 1 | 1.65E-03 |
| phe.Fasting_rs35585404 | S7 | "FANCD2OS,Irs139337303 S8  | DIAPH1      | 4.36E-07 | 1        | 0.000289116 | 1.54E-06 | 1 | 1.65E-03 |
| phe.Fasting_rs35585404 | S7 | "FANCD2OS,Irs139403963 S8  | DIAPH1      | 7.49E-08 | 1        | 5.87E-05    | 2.68E-07 | 1 | 3.43E-04 |
| phe.Fasting_rs35585404 | S7 | "FANCD2OS,Irs139621309 S18 | "LOC1005056 | 4.36E-07 | 1.00E+00 | 2.89E-04    | 1.54E-06 | 1 | 1.65E-03 |
| phe.Fasting_rs35585404 | S7 | "FANCD2OS,Irs139828110 S8  | DIAPH1      | 7.49E-08 | 1.00E+00 | 5.87E-05    | 2.68E-07 | 1 | 3.43E-04 |
| phe.Fasting_rs35585404 | S7 | "FANCD2OS,Irs140070363 S8  | DIAPH1      | 4.36E-07 | 1.00E+00 | 2.89E-04    | 1.54E-06 | 1 | 1.65E-03 |
| phe.Fasting_rs35585404 | S7 | "FANCD2OS,Irs140644750 S13 | DIAPH1      | 4.36E-07 | 1.00E+00 | 2.89E-04    | 1.54E-06 | 1 | 1.65E-03 |
| phe.Fasting_rs35585404 | S7 | "FANCD2OS,Irs141022544 S8  | DIAPH1      | 4.36E-07 | 1.00E+00 | 2.89E-04    | 1.54E-06 | 1 | 1.65E-03 |
| phe.Fasting_rs35585404 | S7 | "FANCD2OS,Irs141525984 S5  | DIAPH1      | 4.36E-07 | 1        | 2.89E-04    | 1.54E-06 | 1 | 1.65E-03 |
| phe.Fasting_rs35585404 | S7 | "FANCD2OS,Irs141692339 S3  | "PCDHGA6,Pi | 8.21E-07 | 1        | 5.08E-04    | 4.90E-06 | 1 | 4.49E-03 |
| phe.Fasting_rs35585404 | S7 | "FANCD2OS,Irs141926074 S8  | ATE1        | 2.88E-07 | 1        | 1.99E-04    | 2.02E-06 | 1 | 2.09E-03 |
| phe.Fasting_rs35585404 | S7 | "FANCD2OS,Irs142480565 S8  | DIAPH1      | 4.36E-07 | 1        | 2.89E-04    | 1.54E-06 | 1 | 1.65E-03 |
| phe.Fasting_rs35585404 | S7 | "FANCD2OS,Irs142718558 S7  | "DIAPH1,LOC | 4.36E-07 | 1        | 2.89E-04    | 1.54E-06 | 1 | 1.65E-03 |
| phe.Fasting_rs35585404 | S7 | "FANCD2OS,Irs142789100 S8  | DIAPH1      | 7.49E-08 | 1        | 5.87E-05    | 2.68E-07 | 1 | 3.43E-04 |
| phe.Fasting_rs35585404 | S7 | "FANCD2OS,Irs142812798 S7  | DIAPH1      | 7.49E-08 | 1.00E+00 | 5.87E-05    | 2.68E-07 | 1 | 3.43E-04 |
| phe.Fasting_rs35585404 | S7 | "FANCD2OS,Irs143377827 S13 | "DIAPH1,LOC | 8.22E-08 | 1.00E+00 | 6.39E-05    | 2.21E-07 | 1 | 2.90E-04 |
| phe.Fasting_rs35585404 | S7 | "FANCD2OS,Irs143691978 S11 | DIAPH1      | 7.49E-08 | 1.00E+00 | 5.87E-05    | 2.79E-07 | 1 | 3.56E-04 |
| phe.Fasting_rs35585404 | S7 | "FANCD2OS,Irs144081334 S11 | DIAPH1      | 7.49E-08 | 1        | 5.87E-05    | 2.79E-07 | 1 | 3.56E-04 |
| phe.Fasting_rs35585404 | S7 | "FANCD2OS,Irs144613910 S8  | DIAPH1      | 4.36E-07 | 1.00E+00 | 2.89E-04    | 1.54E-06 | 1 | 1.65E-03 |
| phe.Fasting_rs35585404 | S7 | "FANCD2OS,Irs145027704 S11 | DIAPH1      | 7.49E-08 | 1        | 5.87E-05    | 2.79E-07 | 1 | 3.56E-04 |
| phe.Fasting_rs35585404 | S7 | "FANCD2OS,Irs146220673 S7  | DIAPH1      | 4.36E-07 | 1        | 2.89E-04    | 1.54E-06 | 1 | 1.65E-03 |
| phe.Fasting_rs35585404 | S7 | "FANCD2OS,Irs146622060 S13 | DIAPH1      | 7.49E-08 | 1        | 5.87E-05    | 2.79E-07 | 1 | 3.56E-04 |
| phe.Fasting_rs35585404 | S7 | "FANCD2OS,Irs146878162 S7  | DIAPH1      | 4.36E-07 | 1        | 2.89E-04    | 1.54E-06 | 1 | 1.65E-03 |
| phe.Fasting_rs35585404 | S7 | "FANCD2OS,Irs147314451 S8  | DIAPH1      | 4.36E-07 | 1        | 2.89E-04    | 1.54E-06 | 1 | 1.65E-03 |
| phe.Fasting_rs35585404 | S7 | "FANCD2OS,Irs147417996 S7  | DIAPH1      | 7.49E-08 | 1.00E+00 | 5.87E-05    | 2.79E-07 | 1 | 3.56E-04 |
| phe.Fasting_rs35585404 | S7 | "FANCD2OS,Irs147506725 S21 | "PCDHGA1,Pi | 6.20E-07 | 1.00E+00 | 3.98E-04    | 3.33E-06 | 1 | 3.20E-03 |
| phe.Fasting_rs35585404 | S7 | "FANCD2OS,Irs147646948 S7  | "LOC1005056 | 4.36E-07 | 1.00E+00 | 2.89E-04    | 1.54E-06 | 1 | 1.65E-03 |
| phe.Fasting_rs35585404 | S7 | "FANCD2OS,Irs147677041 S8  | DIAPH1      | 7.49E-08 | 1.00E+00 | 5.87E-05    | 2.68E-07 | 1 | 3.43E-04 |
| phe.Fasting_rs35585404 | S7 | "FANCD2OS,Irs148116628 S7  | DIAPH1      | 4.36E-07 | 1.00E+00 | 2.89E-04    | 1.54E-06 | 1 | 1.65E-03 |
| phe.Fasting_rs35585404 | S7 | "FANCD2OS,Irs148423011 S7  | DIAPH1      | 4.36E-07 | 1.00E+00 | 2.89E-04    | 1.54E-06 | 1 | 1.65E-03 |
| phe.Fasting_rs35585404 | S7 | "FANCD2OS,Irs149019627 S8  | DIAPH1      | 7.49E-08 | 1        | 5.87E-05    | 2.68E-07 | 1 | 3.43E-04 |
| phe.Fasting_rs35585404 | S7 | "FANCD2OS,Irs149075406 S8  | DIAPH1      | 4.36E-07 | 1.00E+00 | 2.89E-04    | 1.54E-06 | 1 | 1.65E-03 |
| phe.Fasting_rs35585404 | S7 | "FANCD2OS,Irs149334783 S8  | DIAPH1      | 4.36E-07 | 1.00E+00 | 2.89E-04    | 1.54E-06 | 1 | 1.65E-03 |

|                        |    |                        |     |             |          |          |             |          |          |          |
|------------------------|----|------------------------|-----|-------------|----------|----------|-------------|----------|----------|----------|
| phe.Fasting_rs35585404 | S7 | "FANCD2OS,Irs149553852 | S21 | "PCDHGA10,I | 6.20E-07 | 1.00E+00 | 3.98E-04    | 3.33E-06 | 1        | 3.20E-03 |
| phe.Fasting_rs35585404 | S7 | "FANCD2OS,Irs149716949 | S5  | DIAPH1      | 4.70E-08 | 1.00E+00 | 3.87E-05    | 2.98E-07 | 1        | 3.77E-04 |
| phe.Fasting_rs35585404 | S7 | "FANCD2OS,Irs149791570 | S5  | DIAPH1      | 7.49E-08 | 1.00E+00 | 5.87E-05    | 2.68E-07 | 1        | 3.43E-04 |
| phe.Fasting_rs35585404 | S7 | "FANCD2OS,Irs150452206 | S13 | "DIAPH1,LOC | 4.36E-07 | 1.00E+00 | 2.89E-04    | 1.54E-06 | 1        | 1.65E-03 |
| phe.Fasting_rs35585404 | S7 | "FANCD2OS,Irs150675915 | S7  | DIAPH1      | 4.36E-07 | 1.00E+00 | 2.89E-04    | 1.54E-06 | 1        | 1.65E-03 |
| phe.Fasting_rs35585404 | S7 | "FANCD2OS,Irs150765570 | S7  | DIAPH1      | 4.36E-07 | 1        | 0.000289116 | 1.54E-06 | 1        | 1.65E-03 |
| phe.Fasting_rs35585404 | S7 | "FANCD2OS,Irs150992994 | S11 | "PCDHGA5,Pi | 4.50E-07 | 1.00E+00 | 2.98E-04    | 1.47E-06 | 1        | 1.59E-03 |
| phe.Fasting_rs35585404 | S7 | "FANCD2OS,Irs151204700 | S8  | DIAPH1      | 4.36E-07 | 1.00E+00 | 2.89E-04    | 1.54E-06 | 1        | 1.65E-03 |
| phe.Fasting_rs35585404 | S7 | "FANCD2OS,Irs151330468 | S8  | DIAPH1      | 7.49E-08 | 1.00E+00 | 5.87E-05    | 2.79E-07 | 1        | 3.56E-04 |
| phe.Fasting_rs35585404 | S7 | "FANCD2OS,Irs180772028 | S8  | "DIAPH1,LOC | 4.36E-07 | 1.00E+00 | 2.89E-04    | 1.54E-06 | 1        | 1.65E-03 |
| phe.Fasting_rs35585404 | S7 | "FANCD2OS,Irs181224861 | S7  | DIAPH1      | 4.36E-07 | 1.00E+00 | 2.89E-04    | 1.54E-06 | 1        | 1.65E-03 |
| phe.Fasting_rs35585404 | S7 | "FANCD2OS,Irs181247960 | S21 | "PCDHGA9,Pi | 6.20E-07 | 1.00E+00 | 3.98E-04    | 3.33E-06 | 1        | 3.20E-03 |
| phe.Fasting_rs35585404 | S7 | "FANCD2OS,Irs181824655 | S21 | "PCDHGB6,Pi | 6.20E-07 | 1.00E+00 | 3.98E-04    | 3.33E-06 | 1        | 3.20E-03 |
| phe.Fasting_rs35585404 | S7 | "FANCD2OS,Irs182714699 | S8  | DIAPH1      | 4.36E-07 | 1.00E+00 | 2.89E-04    | 1.54E-06 | 1        | 1.65E-03 |
| phe.Fasting_rs35585404 | S7 | "FANCD2OS,Irs182958142 | S8  | DIAPH1      | 2.15E-07 | 1        | 0.0001523   | 5.42E-06 | 1        | 4.91E-03 |
| phe.Fasting_rs35585404 | S7 | "FANCD2OS,Irs182965141 | S8  | DIAPH1      | 8.44E-08 | 1.00E+00 | 6.55E-05    | 2.83E-06 | 1        | 2.78E-03 |
| phe.Fasting_rs35585404 | S7 | "FANCD2OS,Irs183597049 | S7  | DIAPH1      | 4.36E-07 | 1.00E+00 | 2.89E-04    | 1.54E-06 | 1        | 1.65E-03 |
| phe.Fasting_rs35585404 | S7 | "FANCD2OS,Irs183980988 | S2  | NA          | 4.36E-07 | 1.00E+00 | 2.89E-04    | 1.54E-06 | 1        | 1.65E-03 |
| phe.Fasting_rs35585404 | S7 | "FANCD2OS,Irs184233232 | S7  | DIAPH1      | 4.36E-07 | 1.00E+00 | 2.89E-04    | 1.54E-06 | 1        | 1.65E-03 |
| phe.Fasting_rs35585404 | S7 | "FANCD2OS,Irs184509477 | S13 | "PCDHGB4,Pi | 4.36E-07 | 1.00E+00 | 2.89E-04    | 1.54E-06 | 1        | 1.65E-03 |
| phe.Fasting_rs35585404 | S7 | "FANCD2OS,Irs185069296 | S15 | "LOC1005056 | 4.36E-07 | 1.00E+00 | 2.89E-04    | 1.54E-06 | 1        | 1.65E-03 |
| phe.Fasting_rs35585404 | S7 | "FANCD2OS,Irs185502834 | S8  | DIAPH1      | 7.49E-08 | 1.00E+00 | 5.87E-05    | 2.68E-07 | 1        | 3.43E-04 |
| phe.Fasting_rs35585404 | S7 | "FANCD2OS,Irs185759881 | S7  | DIAPH1      | 4.36E-07 | 1.00E+00 | 2.89E-04    | 1.54E-06 | 1        | 1.65E-03 |
| phe.Fasting_rs35585404 | S7 | "FANCD2OS,Irs186288044 | S21 | "PCDHGB4,Pi | 6.20E-07 | 1.00E+00 | 3.98E-04    | 3.33E-06 | 1        | 3.20E-03 |
| phe.Fasting_rs35585404 | S7 | "FANCD2OS,Irs187000011 | S11 | DIAPH1      | 4.36E-07 | 1.00E+00 | 2.89E-04    | 1.54E-06 | 1        | 1.65E-03 |
| phe.Fasting_rs35585404 | S7 | "FANCD2OS,Irs188981295 | S5  | "RPS27AP10, | 4.36E-07 | 1.00E+00 | 2.89E-04    | 1.54E-06 | 1        | 1.65E-03 |
| phe.Fasting_rs35585404 | S7 | "FANCD2OS,Irs190559574 | S7  | DIAPH1      | 7.49E-08 | 1.00E+00 | 5.87E-05    | 2.68E-07 | 1        | 3.43E-04 |
| phe.Fasting_rs35585404 | S7 | "FANCD2OS,Irs191544043 | S8  | DIAPH1      | 4.36E-07 | 1.00E+00 | 2.89E-04    | 1.54E-06 | 1        | 1.65E-03 |
| phe.Fasting_rs35585404 | S7 | "FANCD2OS,Irs191766712 | S7  | DIAPH1      | 4.36E-07 | 1.00E+00 | 2.89E-04    | 1.54E-06 | 1        | 1.65E-03 |
| phe.Fasting_rs35585404 | S7 | "FANCD2OS,Irs192690040 | S7  | DIAPH1      | 4.36E-07 | 1.00E+00 | 2.89E-04    | 1.54E-06 | 1        | 1.65E-03 |
| phe.Fasting_rs35585404 | S7 | "FANCD2OS,Irs192765219 | S7  | DIAPH1      | 4.36E-07 | 1.00E+00 | 2.89E-04    | 1.54E-06 | 1        | 1.65E-03 |
| phe.Fasting_rs35585404 | S7 | "FANCD2OS,Irs192770525 | S7  | DIAPH1      | 4.36E-07 | 1.00E+00 | 2.89E-04    | 1.54E-06 | 1        | 1.65E-03 |
| phe.Fasting_rs35585404 | S7 | "FANCD2OS,Irs35990401  | S7  | DIAPH1      | 3.35E-07 | 1.00E+00 | 2.30E-04    | 5.33E-07 | 1        | 6.34E-04 |
| phe.Fasting_rs35585404 | S7 | "FANCD2OS,Irs3856797   | S12 | VGLL4       | 1.22E-05 | 1        | 5.41E-03    | 9.28E-07 | 1        | 1.05E-03 |
| phe.Fasting_rs35585404 | S7 | "FANCD2OS,Irs55900860  | S7  | DIAPH1      | 7.49E-08 | 1.00E+00 | 5.87E-05    | 2.68E-07 | 1        | 3.43E-04 |
| phe.Fasting_rs35585404 | S7 | "FANCD2OS,Irs57503635  | S3  | NA          | 3.60E-09 | 1.47E-01 | 3.63E-06    | 4.32E-17 | 1.76E-09 | 3.52E-12 |
| phe.Fasting_rs35585404 | S7 | "FANCD2OS,Irs79517926  | S15 | "DIAPH1,LOC | 1.06E-07 | 1.00E+00 | 8.00E-05    | 2.75E-06 | 1        | 2.71E-03 |
| phe.Fasting_rs35793548 | S7 | "FANCD2OS,Irs112027720 | S7  | DIAPH1      | 4.36E-07 | 1.00E+00 | 2.89E-04    | 1.54E-06 | 1        | 1.65E-03 |
| phe.Fasting_rs35793548 | S7 | "FANCD2OS,Irs113219478 | S7  | DIAPH1      | 4.36E-07 | 1.00E+00 | 2.89E-04    | 1.54E-06 | 1        | 1.65E-03 |
| phe.Fasting_rs35793548 | S7 | "FANCD2OS,Irs116279995 | S20 | "PCDHGA4,Pi | 6.20E-07 | 1.00E+00 | 3.98E-04    | 3.33E-06 | 1        | 3.20E-03 |

|                        |    |                            |              |          |          |          |          |   |          |
|------------------------|----|----------------------------|--------------|----------|----------|----------|----------|---|----------|
| phe.Fasting_rs35793548 | S7 | "FANCD2OS,Irs138090701 S5  | HDAC3        | 9.73E-07 | 1.00E+00 | 5.92E-04 | 5.43E-06 | 1 | 4.91E-03 |
| phe.Fasting_rs35793548 | S7 | "FANCD2OS,Irs138136869 S7  | DIAPH1       | 7.49E-08 | 1.00E+00 | 5.87E-05 | 2.68E-07 | 1 | 3.43E-04 |
| phe.Fasting_rs35793548 | S7 | "FANCD2OS,Irs138457103 S10 | DIAPH1       | 2.44E-07 | 1.00E+00 | 1.71E-04 | 1.29E-06 | 1 | 1.42E-03 |
| phe.Fasting_rs35793548 | S7 | "FANCD2OS,Irs138487229 S11 | DIAPH1       | 4.36E-07 | 1.00E+00 | 2.89E-04 | 1.54E-06 | 1 | 1.65E-03 |
| phe.Fasting_rs35793548 | S7 | "FANCD2OS,Irs138738950 S8  | "PCDHGB2,PI  | 4.36E-07 | 1.00E+00 | 2.89E-04 | 1.52E-06 | 1 | 1.64E-03 |
| phe.Fasting_rs35793548 | S7 | "FANCD2OS,Irs139297927 S8  | DIAPH1       | 4.36E-07 | 1.00E+00 | 2.89E-04 | 1.54E-06 | 1 | 1.65E-03 |
| phe.Fasting_rs35793548 | S7 | "FANCD2OS,Irs139337303 S8  | DIAPH1       | 4.36E-07 | 1.00E+00 | 2.89E-04 | 1.54E-06 | 1 | 1.65E-03 |
| phe.Fasting_rs35793548 | S7 | "FANCD2OS,Irs139403963 S8  | DIAPH1       | 7.49E-08 | 1.00E+00 | 5.87E-05 | 2.68E-07 | 1 | 3.43E-04 |
| phe.Fasting_rs35793548 | S7 | "FANCD2OS,Irs139621309 S18 | "LOC1005056  | 4.36E-07 | 1.00E+00 | 2.89E-04 | 1.54E-06 | 1 | 1.65E-03 |
| phe.Fasting_rs35793548 | S7 | "FANCD2OS,Irs139828110 S8  | DIAPH1       | 7.49E-08 | 1.00E+00 | 5.87E-05 | 2.68E-07 | 1 | 3.43E-04 |
| phe.Fasting_rs35793548 | S7 | "FANCD2OS,Irs140070363 S8  | DIAPH1       | 4.36E-07 | 1.00E+00 | 2.89E-04 | 1.54E-06 | 1 | 1.65E-03 |
| phe.Fasting_rs35793548 | S7 | "FANCD2OS,Irs140644750 S13 | DIAPH1       | 4.36E-07 | 1.00E+00 | 2.89E-04 | 1.54E-06 | 1 | 1.65E-03 |
| phe.Fasting_rs35793548 | S7 | "FANCD2OS,Irs141022544 S8  | DIAPH1       | 4.36E-07 | 1.00E+00 | 2.89E-04 | 1.54E-06 | 1 | 1.65E-03 |
| phe.Fasting_rs35793548 | S7 | "FANCD2OS,Irs141525984 S5  | DIAPH1       | 4.36E-07 | 1.00E+00 | 2.89E-04 | 1.54E-06 | 1 | 1.65E-03 |
| phe.Fasting_rs35793548 | S7 | "FANCD2OS,Irs141692339 S3  | "PCDHGA6,PI  | 8.21E-07 | 1.00E+00 | 5.08E-04 | 4.90E-06 | 1 | 4.49E-03 |
| phe.Fasting_rs35793548 | S7 | "FANCD2OS,Irs141926074 S8  | ATE1         | 2.88E-07 | 1.00E+00 | 1.99E-04 | 2.02E-06 | 1 | 2.09E-03 |
| phe.Fasting_rs35793548 | S7 | "FANCD2OS,Irs142480565 S8  | DIAPH1       | 4.36E-07 | 1.00E+00 | 2.89E-04 | 1.54E-06 | 1 | 1.65E-03 |
| phe.Fasting_rs35793548 | S7 | "FANCD2OS,Irs142718558 S7  | "DIAPH1,LOC  | 4.36E-07 | 1.00E+00 | 2.89E-04 | 1.54E-06 | 1 | 1.65E-03 |
| phe.Fasting_rs35793548 | S7 | "FANCD2OS,Irs142789100 S8  | DIAPH1       | 7.49E-08 | 1.00E+00 | 5.87E-05 | 2.68E-07 | 1 | 3.43E-04 |
| phe.Fasting_rs35793548 | S7 | "FANCD2OS,Irs142812798 S7  | DIAPH1       | 7.49E-08 | 1.00E+00 | 5.87E-05 | 2.68E-07 | 1 | 3.43E-04 |
| phe.Fasting_rs35793548 | S7 | "FANCD2OS,Irs143377827 S13 | "DIAPH1,LOC  | 8.22E-08 | 1.00E+00 | 6.39E-05 | 2.21E-07 | 1 | 2.90E-04 |
| phe.Fasting_rs35793548 | S7 | "FANCD2OS,Irs143691978 S11 | DIAPH1       | 7.49E-08 | 1.00E+00 | 5.87E-05 | 2.79E-07 | 1 | 3.56E-04 |
| phe.Fasting_rs35793548 | S7 | "FANCD2OS,Irs144081334 S11 | DIAPH1       | 7.49E-08 | 1.00E+00 | 5.87E-05 | 2.79E-07 | 1 | 3.56E-04 |
| phe.Fasting_rs35793548 | S7 | "FANCD2OS,Irs144613910 S8  | DIAPH1       | 4.36E-07 | 1.00E+00 | 2.89E-04 | 1.54E-06 | 1 | 1.65E-03 |
| phe.Fasting_rs35793548 | S7 | "FANCD2OS,Irs145027704 S11 | DIAPH1       | 7.49E-08 | 1.00E+00 | 5.87E-05 | 2.79E-07 | 1 | 3.56E-04 |
| phe.Fasting_rs35793548 | S7 | "FANCD2OS,Irs146220673 S7  | DIAPH1       | 4.36E-07 | 1.00E+00 | 2.89E-04 | 1.54E-06 | 1 | 1.65E-03 |
| phe.Fasting_rs35793548 | S7 | "FANCD2OS,Irs146622060 S13 | DIAPH1       | 7.49E-08 | 1.00E+00 | 5.87E-05 | 2.79E-07 | 1 | 3.56E-04 |
| phe.Fasting_rs35793548 | S7 | "FANCD2OS,Irs146878162 S7  | DIAPH1       | 4.36E-07 | 1.00E+00 | 2.89E-04 | 1.54E-06 | 1 | 1.65E-03 |
| phe.Fasting_rs35793548 | S7 | "FANCD2OS,Irs147314451 S8  | DIAPH1       | 4.36E-07 | 1.00E+00 | 2.89E-04 | 1.54E-06 | 1 | 1.65E-03 |
| phe.Fasting_rs35793548 | S7 | "FANCD2OS,Irs147417996 S7  | DIAPH1       | 7.49E-08 | 1.00E+00 | 5.87E-05 | 2.79E-07 | 1 | 3.56E-04 |
| phe.Fasting_rs35793548 | S7 | "FANCD2OS,Irs147506725 S21 | "PCDHGA1,PI  | 6.20E-07 | 1.00E+00 | 3.98E-04 | 3.33E-06 | 1 | 3.20E-03 |
| phe.Fasting_rs35793548 | S7 | "FANCD2OS,Irs147646948 S7  | "LOC1005056  | 4.36E-07 | 1.00E+00 | 2.89E-04 | 1.54E-06 | 1 | 1.65E-03 |
| phe.Fasting_rs35793548 | S7 | "FANCD2OS,Irs147677041 S8  | DIAPH1       | 7.49E-08 | 1.00E+00 | 5.87E-05 | 2.68E-07 | 1 | 3.43E-04 |
| phe.Fasting_rs35793548 | S7 | "FANCD2OS,Irs148116628 S7  | DIAPH1       | 4.36E-07 | 1.00E+00 | 2.89E-04 | 1.54E-06 | 1 | 1.65E-03 |
| phe.Fasting_rs35793548 | S7 | "FANCD2OS,Irs148423011 S7  | DIAPH1       | 4.36E-07 | 1.00E+00 | 2.89E-04 | 1.54E-06 | 1 | 1.65E-03 |
| phe.Fasting_rs35793548 | S7 | "FANCD2OS,Irs149019627 S8  | DIAPH1       | 7.49E-08 | 1.00E+00 | 5.87E-05 | 2.68E-07 | 1 | 3.43E-04 |
| phe.Fasting_rs35793548 | S7 | "FANCD2OS,Irs149075406 S8  | DIAPH1       | 4.36E-07 | 1.00E+00 | 2.89E-04 | 1.54E-06 | 1 | 1.65E-03 |
| phe.Fasting_rs35793548 | S7 | "FANCD2OS,Irs149334783 S8  | DIAPH1       | 4.36E-07 | 1.00E+00 | 2.89E-04 | 1.54E-06 | 1 | 1.65E-03 |
| phe.Fasting_rs35793548 | S7 | "FANCD2OS,Irs149553852 S21 | "PCDHGA10,PI | 6.20E-07 | 1.00E+00 | 3.98E-04 | 3.33E-06 | 1 | 3.20E-03 |
| phe.Fasting_rs35793548 | S7 | "FANCD2OS,Irs149716949 S5  | DIAPH1       | 4.70E-08 | 1.00E+00 | 3.87E-05 | 2.98E-07 | 1 | 3.77E-04 |

|                        |    |                           |             |          |          |          |          |           |          |
|------------------------|----|---------------------------|-------------|----------|----------|----------|----------|-----------|----------|
| phe.Fasting_rs35793548 | S7 | "FANCD2OS,Irs149791570S5  | DIAPH1      | 7.49E-08 | 1.00E+00 | 5.87E-05 | 2.68E-07 | 1         | 3.43E-04 |
| phe.Fasting_rs35793548 | S7 | "FANCD2OS,Irs150452206S13 | "DIAPH1,LOC | 4.36E-07 | 1.00E+00 | 2.89E-04 | 1.54E-06 | 1         | 1.65E-03 |
| phe.Fasting_rs35793548 | S7 | "FANCD2OS,Irs150675915S7  | DIAPH1      | 4.36E-07 | 1.00E+00 | 2.89E-04 | 1.54E-06 | 1         | 1.65E-03 |
| phe.Fasting_rs35793548 | S7 | "FANCD2OS,Irs150765570S7  | DIAPH1      | 4.36E-07 | 1.00E+00 | 2.89E-04 | 1.54E-06 | 1         | 1.65E-03 |
| phe.Fasting_rs35793548 | S7 | "FANCD2OS,Irs150992994S11 | "PCDHGA5,Pi | 4.50E-07 | 1.00E+00 | 2.98E-04 | 1.47E-06 | 1         | 1.59E-03 |
| phe.Fasting_rs35793548 | S7 | "FANCD2OS,Irs151204700S8  | DIAPH1      | 4.36E-07 | 1.00E+00 | 2.89E-04 | 1.54E-06 | 1         | 1.65E-03 |
| phe.Fasting_rs35793548 | S7 | "FANCD2OS,Irs151330468S8  | DIAPH1      | 7.49E-08 | 1.00E+00 | 5.87E-05 | 2.79E-07 | 1         | 3.56E-04 |
| phe.Fasting_rs35793548 | S7 | "FANCD2OS,Irs180772028S8  | "DIAPH1,LOC | 4.36E-07 | 1.00E+00 | 2.89E-04 | 1.54E-06 | 1         | 1.65E-03 |
| phe.Fasting_rs35793548 | S7 | "FANCD2OS,Irs181224861S7  | DIAPH1      | 4.36E-07 | 1.00E+00 | 2.89E-04 | 1.54E-06 | 1         | 1.65E-03 |
| phe.Fasting_rs35793548 | S7 | "FANCD2OS,Irs181247960S21 | "PCDHGA9,Pi | 6.20E-07 | 1.00E+00 | 3.98E-04 | 3.33E-06 | 1         | 3.20E-03 |
| phe.Fasting_rs35793548 | S7 | "FANCD2OS,Irs181824655S21 | "PCDHGB6,Pi | 6.20E-07 | 1.00E+00 | 3.98E-04 | 3.33E-06 | 1         | 3.20E-03 |
| phe.Fasting_rs35793548 | S7 | "FANCD2OS,Irs182714699S8  | DIAPH1      | 4.36E-07 | 1.00E+00 | 2.89E-04 | 1.54E-06 | 1         | 1.65E-03 |
| phe.Fasting_rs35793548 | S7 | "FANCD2OS,Irs182958142S8  | DIAPH1      | 2.15E-07 | 1.00E+00 | 1.52E-04 | 5.42E-06 | 1         | 4.91E-03 |
| phe.Fasting_rs35793548 | S7 | "FANCD2OS,Irs182965141S8  | DIAPH1      | 8.44E-08 | 1.00E+00 | 6.55E-05 | 2.83E-06 | 1         | 2.78E-03 |
| phe.Fasting_rs35793548 | S7 | "FANCD2OS,Irs183597049S7  | DIAPH1      | 4.36E-07 | 1.00E+00 | 2.89E-04 | 1.54E-06 | 1         | 1.65E-03 |
| phe.Fasting_rs35793548 | S7 | "FANCD2OS,Irs183980988S2  | NA          | 4.36E-07 | 1.00E+00 | 2.89E-04 | 1.54E-06 | 1         | 1.65E-03 |
| phe.Fasting_rs35793548 | S7 | "FANCD2OS,Irs184233232S7  | DIAPH1      | 4.36E-07 | 1.00E+00 | 2.89E-04 | 1.54E-06 | 1         | 1.65E-03 |
| phe.Fasting_rs35793548 | S7 | "FANCD2OS,Irs184509477S13 | "PCDHGB4,Pi | 4.36E-07 | 1.00E+00 | 2.89E-04 | 1.54E-06 | 1         | 1.65E-03 |
| phe.Fasting_rs35793548 | S7 | "FANCD2OS,Irs185069296S15 | "LOC1005056 | 4.36E-07 | 1.00E+00 | 2.89E-04 | 1.54E-06 | 1         | 1.65E-03 |
| phe.Fasting_rs35793548 | S7 | "FANCD2OS,Irs185502834S8  | DIAPH1      | 7.49E-08 | 1.00E+00 | 5.87E-05 | 2.68E-07 | 1         | 3.43E-04 |
| phe.Fasting_rs35793548 | S7 | "FANCD2OS,Irs185759881S7  | DIAPH1      | 4.36E-07 | 1.00E+00 | 2.89E-04 | 1.54E-06 | 1         | 1.65E-03 |
| phe.Fasting_rs35793548 | S7 | "FANCD2OS,Irs186288044S21 | "PCDHGB4,Pi | 6.20E-07 | 1.00E+00 | 3.98E-04 | 3.33E-06 | 1         | 3.20E-03 |
| phe.Fasting_rs35793548 | S7 | "FANCD2OS,Irs187000011S11 | DIAPH1      | 4.36E-07 | 1.00E+00 | 2.89E-04 | 1.54E-06 | 1         | 1.65E-03 |
| phe.Fasting_rs35793548 | S7 | "FANCD2OS,Irs188981295S5  | "RPS27AP10, | 4.36E-07 | 1.00E+00 | 2.89E-04 | 1.54E-06 | 1         | 1.65E-03 |
| phe.Fasting_rs35793548 | S7 | "FANCD2OS,Irs190559574S7  | DIAPH1      | 7.49E-08 | 1.00E+00 | 5.87E-05 | 2.68E-07 | 1         | 3.43E-04 |
| phe.Fasting_rs35793548 | S7 | "FANCD2OS,Irs191544043S8  | DIAPH1      | 4.36E-07 | 1.00E+00 | 2.89E-04 | 1.54E-06 | 1         | 1.65E-03 |
| phe.Fasting_rs35793548 | S7 | "FANCD2OS,Irs191766712S7  | DIAPH1      | 4.36E-07 | 1.00E+00 | 2.89E-04 | 1.54E-06 | 1         | 1.65E-03 |
| phe.Fasting_rs35793548 | S7 | "FANCD2OS,Irs192690040S7  | DIAPH1      | 4.36E-07 | 1.00E+00 | 2.89E-04 | 1.54E-06 | 1         | 1.65E-03 |
| phe.Fasting_rs35793548 | S7 | "FANCD2OS,Irs192765219S7  | DIAPH1      | 4.36E-07 | 1.00E+00 | 2.89E-04 | 1.54E-06 | 1         | 1.65E-03 |
| phe.Fasting_rs35793548 | S7 | "FANCD2OS,Irs192770525S7  | DIAPH1      | 4.36E-07 | 1.00E+00 | 2.89E-04 | 1.54E-06 | 1         | 1.65E-03 |
| phe.Fasting_rs35793548 | S7 | "FANCD2OS,Irs35990401 S7  | DIAPH1      | 3.35E-07 | 1.00E+00 | 2.30E-04 | 5.33E-07 | 1         | 6.34E-04 |
| phe.Fasting_rs35793548 | S7 | "FANCD2OS,Irs3856797 S12  | VGLL4       | 1.22E-05 | 1.00E+00 | 5.41E-03 | 9.28E-07 | 1         | 1.05E-03 |
| phe.Fasting_rs35793548 | S7 | "FANCD2OS,Irs55900860 S7  | DIAPH1      | 7.49E-08 | 1.00E+00 | 5.87E-05 | 2.68E-07 | 1         | 3.43E-04 |
| phe.Fasting_rs35793548 | S7 | "FANCD2OS,Irs57503635 S3  | NA          | 3.60E-09 | 1.47E-01 | 3.63E-06 | 4.32E-17 | 1.76E-09  | 3.52E-12 |
| phe.Fasting_rs35793548 | S7 | "FANCD2OS,Irs79517926 S15 | "DIAPH1,LOC | 1.06E-07 | 1.00E+00 | 8.00E-05 | 2.75E-06 | 1         | 2.71E-03 |
| phe.Fasting_rs35990401 | S7 | DIAPH1 rs111576333S5      | TMEM64      | 2.04E-06 | 1.00E+00 | 1.14E-03 | 1.89E-14 | 7.69E-07  | 1.55E-10 |
| phe.Fasting_rs35990401 | S7 | DIAPH1 rs112089881S8      | ZFAND4      | 1.58E-17 | 6.45E-10 | 1.21E-13 | 3.48E-10 | 0.0141516 | 9.21E-07 |
| phe.Fasting_rs35990401 | S7 | DIAPH1 rs112091318S5      | TMEM64      | 6.07E-07 | 1.00E+00 | 3.91E-04 | 1.51E-08 | 0.614243  | 2.67E-05 |
| phe.Fasting_rs35990401 | S7 | DIAPH1 rs114334325S7      | AP3M2       | 5.28E-15 | 2.16E-07 | 1.37E-11 | 1.38E-07 | 1         | 1.89E-04 |
| phe.Fasting_rs35990401 | S7 | DIAPH1 rs114394395S7      | AP3M2       | 5.61E-15 | 2.29E-07 | 1.46E-11 | 1.38E-07 | 1         | 1.89E-04 |

|                        |    |        |             |     |           |          |             |          |          |             |          |
|------------------------|----|--------|-------------|-----|-----------|----------|-------------|----------|----------|-------------|----------|
| phe.Fasting_rs35990401 | S7 | DIAPH1 | rs114565620 | S8  | RCL1      | 1.20E-16 | 4.90E-09    | 4.92E-13 | 1.41E-08 | 0.575181    | 2.53E-05 |
| phe.Fasting_rs35990401 | S7 | DIAPH1 | rs115083290 | S19 | NA        | 3.58E-16 | 1.46E-08    | 1.17E-12 | 4.52E-09 | 0.183881    | 9.08E-06 |
| phe.Fasting_rs35990401 | S7 | DIAPH1 | rs115752779 | S19 | NA        | 3.58E-16 | 1.46E-08    | 1.17E-12 | 4.52E-09 | 0.183881    | 9.08E-06 |
| phe.Fasting_rs35990401 | S7 | DIAPH1 | rs115787552 | S5  | KPNA3     | 2.33E-15 | 9.53E-08    | 6.57E-12 | 4.20E-14 | 1.71E-06    | 2.93E-10 |
| phe.Fasting_rs35990401 | S7 | DIAPH1 | rs115888477 | S8  | NA        | 1.61E-14 | 6.59E-07    | 4.05E-11 | 7.57E-15 | 3.08E-07    | 6.71E-11 |
| phe.Fasting_rs35990401 | S7 | DIAPH1 | rs116011837 | S9  | BRD2      | 4.39E-11 | 1.79E-03    | 6.00E-08 | 1.51E-14 | 6.13E-07    | 1.27E-10 |
| phe.Fasting_rs35990401 | S7 | DIAPH1 | rs116079984 | S8  | KPNA3     | 2.33E-15 | 9.53E-08    | 6.57E-12 | 4.41E-14 | 1.80E-06    | 3.07E-10 |
| phe.Fasting_rs35990401 | S7 | DIAPH1 | rs116120727 | S9  | BRD2      | 4.39E-11 | 1.79E-03    | 6.00E-08 | 1.51E-14 | 6.13E-07    | 1.27E-10 |
| phe.Fasting_rs35990401 | S7 | DIAPH1 | rs116406581 | S2  | NA        | 2.07E-14 | 8.45E-07    | 5.12E-11 | 8.24E-08 | 1           | 1.19E-04 |
| phe.Fasting_rs35990401 | S7 | DIAPH1 | rs116548615 | S8  | TMEM45B   | 1.34E-16 | 5.49E-09    | 5.35E-13 | 4.86E-12 | 0.000197863 | 1.92E-08 |
| phe.Fasting_rs35990401 | S7 | DIAPH1 | rs116696844 | S3  | AP3M2     | 7.91E-15 | 3.23E-07    | 2.03E-11 | 1.38E-07 | 1           | 1.89E-04 |
| phe.Fasting_rs35990401 | S7 | DIAPH1 | rs11989304  | S4  | TMEM64    | 2.04E-06 | 1           | 1.14E-03 | 2.30E-11 | 0.000934597 | 7.99E-08 |
| phe.Fasting_rs35990401 | S7 | DIAPH1 | rs140524622 | S7  | MRPL10    | 8.14E-17 | 3.32E-09    | 3.58E-13 | 2.74E-06 | 1           | 2.71E-03 |
| phe.Fasting_rs35990401 | S7 | DIAPH1 | rs146815317 | S5  | KPNA3     | 2.33E-15 | 9.53E-08    | 6.57E-12 | 4.20E-14 | 1.71E-06    | 2.93E-10 |
| phe.Fasting_rs35990401 | S7 | DIAPH1 | rs150117838 | S8  | KPNA3     | 2.33E-15 | 9.53E-08    | 6.57E-12 | 3.88E-14 | 1.58E-06    | 2.77E-10 |
| phe.Fasting_rs35990401 | S7 | DIAPH1 | rs150916187 | S4  | HIST1H2BK | 1.31E-05 | 1           | 5.79E-03 | 4.45E-15 | 1.81E-07    | 4.13E-11 |
| phe.Fasting_rs35990401 | S7 | DIAPH1 | rs16894241  | S4  | HIST1H2BK | 1.95E-11 | 0.000797308 | 2.91E-08 | 1.21E-14 | 4.92E-07    | 1.04E-10 |
| phe.Fasting_rs35990401 | S7 | DIAPH1 | rs2153597   | S8  | ZNF438    | 4.44E-11 | 0.00181386  | 6.06E-08 | 1.36E-09 | 0.0554562   | 3.12E-06 |
| phe.Fasting_rs35990401 | S7 | DIAPH1 | rs34801978  | S3  | HOXB2     | 1.08E-05 | 1           | 4.89E-03 | 3.18E-09 | 0.129398    | 6.69E-06 |
| phe.Fasting_rs35990401 | S7 | DIAPH1 | rs4732511   | S13 | POR       | 5.46E-14 | 2.23E-06    | 1.28E-10 | 4.24E-06 | 1           | 3.97E-03 |
| phe.Fasting_rs35990401 | S7 | DIAPH1 | rs57503635  | S3  | NA        | 5.14E-16 | 2.10E-08    | 1.62E-12 | 1.17E-14 | 4.77E-07    | 1.01E-10 |
| phe.Fasting_rs35990401 | S7 | DIAPH1 | rs60011869  | S16 | NA        | 9.41E-06 | 1           | 4.34E-03 | 2.99E-07 | 1           | 3.78E-04 |
| phe.Fasting_rs35990401 | S7 | DIAPH1 | rs6964407   | S7  | POR       | 1.79E-13 | 7.33E-06    | 3.97E-10 | 3.90E-06 | 1           | 3.68E-03 |
| phe.Fasting_rs35990401 | S7 | DIAPH1 | rs7004597   | S8  | NA        | 5.28E-15 | 2.16E-07    | 1.37E-11 | 8.19E-08 | 1           | 1.18E-04 |
| phe.Fasting_rs35990401 | S7 | DIAPH1 | rs7256517   | S7  | CYTH2     | 7.66E-16 | 3.13E-08    | 2.33E-12 | 1.66E-12 | 6.75E-05    | 7.38E-09 |
| phe.Fasting_rs35990401 | S7 | DIAPH1 | rs73283603  | S7  | ZWINT     | 1.96E-06 | 1           | 1.10E-03 | 6.64E-08 | 1           | 9.92E-05 |
| phe.Fasting_rs35990401 | S7 | DIAPH1 | rs73392640  | S8  | POLR3B    | 2.09E-10 | 0.00851672  | 2.57E-07 | 1.81E-11 | 0.000735868 | 6.45E-08 |
| phe.Fasting_rs35990401 | S7 | DIAPH1 | rs734069    | S19 | NA        | 3.93E-07 | 1           | 2.65E-04 | 1.59E-10 | 0.00648853  | 4.65E-07 |
| phe.Fasting_rs35990401 | S7 | DIAPH1 | rs73619637  | S8  | NA        | 1.06E-15 | 4.32E-08    | 3.12E-12 | 1.00E-07 | 1           | 1.41E-04 |
| phe.Fasting_rs35990401 | S7 | DIAPH1 | rs74627895  | S8  | TMEM64    | 6.07E-07 | 1           | 3.91E-04 | 7.66E-09 | 0.311718    | 1.47E-05 |
| phe.Fasting_rs35990401 | S7 | DIAPH1 | rs74914207  | S24 | NA        | 1.27E-10 | 0.00520584  | 1.62E-07 | 3.83E-11 | 0.00156001  | 1.27E-07 |
| phe.Fasting_rs35990401 | S7 | DIAPH1 | rs75350765  | S5  | RCL1      | 1.20E-16 | 4.90E-09    | 4.92E-13 | 1.41E-08 | 0.575181    | 2.53E-05 |
| phe.Fasting_rs35990401 | S7 | DIAPH1 | rs75374128  | S5  | CNTLN     | 1.21E-16 | 4.95E-09    | 4.95E-13 | 3.81E-08 | 1           | 5.99E-05 |
| phe.Fasting_rs35990401 | S7 | DIAPH1 | rs75506779  | S5  | TMCO3     | 5.25E-07 | 1           | 3.43E-04 | 4.09E-09 | 0.166311    | 8.38E-06 |
| phe.Fasting_rs35990401 | S7 | DIAPH1 | rs75758702  | S24 | NA        | 5.25E-17 | 2.14E-09    | 2.57E-13 | 4.83E-11 | 0.00196695  | 1.56E-07 |
| phe.Fasting_rs35990401 | S7 | DIAPH1 | rs75864203  | S8  | CNTLN     | 1.21E-16 | 4.95E-09    | 4.95E-13 | 3.81E-08 | 1           | 5.99E-05 |
| phe.Fasting_rs35990401 | S7 | DIAPH1 | rs75949566  | S5  | TMEM64    | 2.38E-06 | 1           | 1.30E-03 | 2.91E-11 | 0.00118347  | 9.96E-08 |
| phe.Fasting_rs35990401 | S7 | DIAPH1 | rs76844308  | S8  | CNTLN     | 6.49E-17 | 2.65E-09    | 2.98E-13 | 3.56E-08 | 1           | 5.67E-05 |
| phe.Fasting_rs35990401 | S7 | DIAPH1 | rs7763107   | S8  | FARS2     | 4.27E-16 | 1.75E-08    | 1.38E-12 | 2.93E-12 | 0.000119347 | 1.25E-08 |
| phe.Fasting_rs35990401 | S7 | DIAPH1 | rs77798597  | S7  | KPNA3     | 2.33E-15 | 9.53E-08    | 6.57E-12 | 3.88E-14 | 1.58E-06    | 2.77E-10 |

|              |            |     |          |             |     |             |          |            |             |          |             |          |
|--------------|------------|-----|----------|-------------|-----|-------------|----------|------------|-------------|----------|-------------|----------|
| phe.Fasting_ | rs35990401 | S7  | DIAPH1   | rs77845645  | S21 | NA          | 1.30E-06 | 1          | 7.66E-04    | 1.46E-11 | 0.000593244 | 5.27E-08 |
| phe.Fasting_ | rs35990401 | S7  | DIAPH1   | rs78353402  | S8  | AP3M2       | 5.28E-15 | 2.16E-07   | 1.37E-11    | 1.38E-07 | 1           | 1.89E-04 |
| phe.Fasting_ | rs35990401 | S7  | DIAPH1   | rs78516788  | S8  | SLC38A1     | 2.51E-11 | 0.0010242  | 3.64E-08    | 9.15E-11 | 0.0037246   | 2.81E-07 |
| phe.Fasting_ | rs35990401 | S7  | DIAPH1   | rs78697063  | S5  | MSI2        | 5.33E-19 | 2.17E-11   | 2.49E-14    | 2.11E-10 | 0.00860784  | 5.94E-07 |
| phe.Fasting_ | rs35990401 | S7  | DIAPH1   | rs78703708  | S7  | FAF2        | 3.95E-11 | 0.00161483 | 5.44E-08    | 1.26E-05 | 1           | 9.77E-03 |
| phe.Fasting_ | rs35990401 | S7  | DIAPH1   | rs78722272  | S5  | CNTLN       | 1.21E-16 | 4.95E-09   | 4.95E-13    | 3.97E-08 | 1           | 6.22E-05 |
| phe.Fasting_ | rs35990401 | S7  | DIAPH1   | rs78736524  | S5  | KPNA3       | 2.33E-15 | 9.53E-08   | 6.57E-12    | 4.20E-14 | 1.71E-06    | 2.93E-10 |
| phe.Fasting_ | rs35990401 | S7  | DIAPH1   | rs78990344  | S2  | LOC1005063  | 2.04E-06 | 1          | 1.14E-03    | 2.30E-11 | 0.000934597 | 7.99E-08 |
| phe.Fasting_ | rs35990401 | S7  | DIAPH1   | rs79781495  | S8  | KPNA3       | 2.33E-15 | 9.53E-08   | 6.57E-12    | 3.88E-14 | 1.58E-06    | 2.77E-10 |
| phe.Fasting_ | rs35990401 | S7  | DIAPH1   | rs80200953  | S8  | PPP2R5D     | 6.81E-17 | 2.78E-09   | 3.09E-13    | 1.12E-09 | 0.0455817   | 2.64E-06 |
| phe.Fasting_ | rs35990401 | S7  | DIAPH1   | rs80332465  | S5  | KPNA3       | 2.46E-15 | 1.01E-07   | 6.92E-12    | 4.18E-14 | 1.70E-06    | 2.93E-10 |
| phe.Fasting_ | rs35990401 | S7  | DIAPH1   | rs80334773  | S5  | KPNA3       | 2.46E-15 | 1.01E-07   | 6.92E-12    | 4.18E-14 | 1.70E-06    | 2.93E-10 |
| phe.Fasting_ | rs36016794 | S21 | ARHGAP39 | rs139070959 | S8  | RPN2        | 7.11E-17 | 2.90E-09   | 3.19E-13    | 1.79E-07 | 1           | 2.40E-04 |
| phe.Fasting_ | rs36016794 | S21 | ARHGAP39 | rs145412529 | S8  | "RBL1,RPS3A | 4.02E-17 | 1.64E-09   | 2.14E-13    | 1.90E-07 | 1           | 2.53E-04 |
| phe.Fasting_ | rs366767   | S5  | ZC3H3    | rs114565620 | S8  | RCL1        | 4.48E-07 | 1          | 0.000296364 | 3.24E-12 | 0.000131823 | 1.37E-08 |
| phe.Fasting_ | rs366767   | S5  | ZC3H3    | rs139070959 | S8  | RPN2        | 1.79E-18 | 7.31E-11   | 3.84E-14    | 4.54E-15 | 1.85E-07    | 4.22E-11 |
| phe.Fasting_ | rs366767   | S5  | ZC3H3    | rs145412529 | S8  | "RBL1,RPS3A | 9.93E-19 | 4.06E-11   | 2.92E-14    | 5.18E-15 | 2.11E-07    | 4.77E-11 |
| phe.Fasting_ | rs366767   | S5  | ZC3H3    | rs75350765  | S5  | RCL1        | 4.48E-07 | 1.00E+00   | 2.96E-04    | 3.24E-12 | 0.000131823 | 1.37E-08 |
| phe.Fasting_ | rs366767   | S5  | ZC3H3    | rs75374128  | S5  | CNTLN       | 8.87E-11 | 3.62E-03   | 1.16E-07    | 5.59E-06 | 1           | 5.02E-03 |
| phe.Fasting_ | rs366767   | S5  | ZC3H3    | rs75864203  | S8  | CNTLN       | 8.87E-11 | 3.62E-03   | 1.16E-07    | 5.59E-06 | 1           | 5.02E-03 |
| phe.Fasting_ | rs366767   | S5  | ZC3H3    | rs76844308  | S8  | CNTLN       | 9.70E-13 | 3.96E-05   | 2.00E-09    | 3.38E-06 | 1           | 3.25E-03 |
| phe.Fasting_ | rs366767   | S5  | ZC3H3    | rs78516788  | S8  | SLC38A1     | 1.59E-07 | 1.00E+00   | 1.15E-04    | 1.41E-07 | 1           | 1.94E-04 |
| phe.Fasting_ | rs366767   | S5  | ZC3H3    | rs78722272  | S5  | CNTLN       | 8.87E-11 | 3.62E-03   | 1.16E-07    | 5.97E-06 | 1           | 5.30E-03 |
| phe.Fasting_ | rs366767   | S5  | ZC3H3    | rs79886603  | S15 | NA          | 5.21E-06 | 1          | 2.58E-03    | 2.71E-07 | 1           | 3.47E-04 |
| phe.Fasting_ | rs3741054  | S1  | ACAT1    | rs116681717 | S8  | DTD2        | 1.21E-08 | 0.492215   | 1.10E-05    | 8.96E-07 | 1           | 1.02E-03 |
| phe.Fasting_ | rs3741054  | S1  | ACAT1    | rs141072133 | S8  | DTD2        | 1.24E-08 | 0.507745   | 1.14E-05    | 2.89E-06 | 1           | 2.84E-03 |
| phe.Fasting_ | rs3769992  | S8  | MTX2     | rs116011837 | S9  | BRD2        | 1.52E-05 | 1          | 0.00656863  | 1.16E-05 | 1           | 9.14E-03 |
| phe.Fasting_ | rs3769992  | S8  | MTX2     | rs116120727 | S9  | BRD2        | 1.52E-05 | 1          | 6.57E-03    | 1.16E-05 | 1           | 9.14E-03 |
| phe.Fasting_ | rs3769992  | S8  | MTX2     | rs149716949 | S5  | DIAPH1      | 5.47E-08 | 1.00E+00   | 4.45E-05    | 1.76E-06 | 1           | 1.85E-03 |
| phe.Fasting_ | rs3769992  | S8  | MTX2     | rs150992994 | S11 | "PCDHGA5,Pi | 1.36E-07 | 1.00E+00   | 1.00E-04    | 1.09E-06 | 1           | 1.22E-03 |
| phe.Fasting_ | rs3769992  | S8  | MTX2     | rs79517926  | S15 | "DIAPH1,LOC | 1.32E-06 | 1.00E+00   | 7.77E-04    | 6.78E-09 | 0.276178    | 1.31E-05 |
| phe.Fasting_ | rs3772186  | S6  | PHC3     | rs111576333 | S5  | TMEM64      | 2.07E-08 | 8.44E-01   | 1.82E-05    | 2.31E-10 | 0.00941342  | 6.43E-07 |
| phe.Fasting_ | rs3772186  | S6  | PHC3     | rs112091318 | S5  | TMEM64      | 6.28E-09 | 2.57E-01   | 6.07E-06    | 3.37E-10 | 0.013698    | 8.96E-07 |
| phe.Fasting_ | rs3772186  | S6  | PHC3     | rs112348319 | S8  | SPTLC1      | 1.92E-05 | 1.00E+00   | 8.06E-03    | 7.84E-10 | 0.0319139   | 1.93E-06 |
| phe.Fasting_ | rs3772186  | S6  | PHC3     | rs112608164 | S8  | SPTLC1      | 1.92E-05 | 1.00E+00   | 8.06E-03    | 7.84E-10 | 0.0319139   | 1.93E-06 |
| phe.Fasting_ | rs3772186  | S6  | PHC3     | rs113568654 | S12 | SPTLC1      | 1.84E-05 | 1.00E+00   | 7.76E-03    | 1.04E-08 | 0.421423    | 1.91E-05 |
| phe.Fasting_ | rs3772186  | S6  | PHC3     | rs114565620 | S8  | RCL1        | 2.84E-19 | 1.16E-11   | 2.40E-14    | 4.01E-07 | 1           | 4.90E-04 |
| phe.Fasting_ | rs3772186  | S6  | PHC3     | rs115083290 | S19 | NA          | 8.85E-08 | 1          | 6.83E-05    | 3.40E-09 | 0.138522    | 7.12E-06 |
| phe.Fasting_ | rs3772186  | S6  | PHC3     | rs115752779 | S19 | NA          | 8.85E-08 | 1          | 6.83E-05    | 3.40E-09 | 0.138522    | 7.12E-06 |
| phe.Fasting_ | rs3772186  | S6  | PHC3     | rs115888477 | S8  | NA          | 1.34E-06 | 1          | 7.91E-04    | 7.82E-11 | 0.00318365  | 2.44E-07 |

|                       |     |       |                 |               |          |            |          |          |             |          |
|-----------------------|-----|-------|-----------------|---------------|----------|------------|----------|----------|-------------|----------|
| phe.Fasting_rs3772186 | S6  | PHC3  | rs116011837 S9  | BRD2          | 2.70E-13 | 1.10E-05   | 5.81E-10 | 2.07E-11 | 0.000841008 | 7.31E-08 |
| phe.Fasting_rs3772186 | S6  | PHC3  | rs116120727 S9  | BRD2          | 2.70E-13 | 1.10E-05   | 5.81E-10 | 2.07E-11 | 0.000841008 | 7.31E-08 |
| phe.Fasting_rs3772186 | S6  | PHC3  | rs116548615 S8  | TMEM45B       | 5.29E-19 | 2.16E-11   | 2.49E-14 | 7.92E-10 | 0.0322544   | 1.95E-06 |
| phe.Fasting_rs3772186 | S6  | PHC3  | rs11989304 S4   | TMEM64        | 2.07E-08 | 0.844108   | 1.82E-05 | 2.29E-10 | 0.00932569  | 6.39E-07 |
| phe.Fasting_rs3772186 | S6  | PHC3  | rs140524622 S7  | MRPL10        | 2.30E-08 | 0.93902    | 2.01E-05 | 2.14E-06 | 1           | 2.19E-03 |
| phe.Fasting_rs3772186 | S6  | PHC3  | rs141926074 S8  | ATE1          | 1.23E-19 | 5.04E-12   | 2.23E-14 | 1.34E-11 | 0.000545558 | 4.89E-08 |
| phe.Fasting_rs3772186 | S6  | PHC3  | rs73392640 S8   | POLR3B        | 6.58E-08 | 1          | 5.26E-05 | 8.97E-06 | 1           | 7.47E-03 |
| phe.Fasting_rs3772186 | S6  | PHC3  | rs74627895 S8   | TMEM64        | 6.28E-09 | 0.256524   | 6.07E-06 | 1.27E-06 | 1           | 1.40E-03 |
| phe.Fasting_rs3772186 | S6  | PHC3  | rs75350765 S5   | RCL1          | 2.84E-19 | 1.16E-11   | 2.40E-14 | 4.01E-07 | 1           | 4.90E-04 |
| phe.Fasting_rs3772186 | S6  | PHC3  | rs75506779 S5   | TMCO3         | 7.38E-14 | 3.01E-06   | 1.70E-10 | 3.50E-06 | 1           | 3.35E-03 |
| phe.Fasting_rs3772186 | S6  | PHC3  | rs75949566 S5   | TMEM64        | 2.26E-08 | 0.923876   | 1.98E-05 | 3.24E-10 | 0.0132      | 8.70E-07 |
| phe.Fasting_rs3772186 | S6  | PHC3  | rs76542405 S5   | SPTLC1        | 1.92E-05 | 1          | 8.06E-03 | 7.84E-10 | 0.0319139   | 1.93E-06 |
| phe.Fasting_rs3772186 | S6  | PHC3  | rs77523818 S7   | SPTLC1        | 1.92E-05 | 1          | 8.06E-03 | 7.84E-10 | 0.0319139   | 1.93E-06 |
| phe.Fasting_rs3772186 | S6  | PHC3  | rs7763107 S8    | FARS2         | 1.30E-09 | 0.0532742  | 1.41E-06 | 2.87E-06 | 1           | 2.82E-03 |
| phe.Fasting_rs3772186 | S6  | PHC3  | rs77845645 S21  | NA            | 9.87E-09 | 0.403004   | 9.22E-06 | 9.90E-13 | 4.03E-05    | 4.68E-09 |
| phe.Fasting_rs3772186 | S6  | PHC3  | rs78990344 S2   | LOC10050631   | 2.07E-08 | 0.844108   | 1.82E-05 | 2.29E-10 | 0.00932569  | 6.39E-07 |
| phe.Fasting_rs3804619 | S8  | COPG2 | rs116079984 S8  | KPNA3         | 6.53E-06 | 1          | 3.16E-03 | 3.57E-08 | 1           | 5.68E-05 |
| phe.Fasting_rs3804619 | S8  | COPG2 | rs74627895 S8   | TMEM64        | 2.27E-10 | 0.00926441 | 2.78E-07 | 7.43E-06 | 1           | 6.37E-03 |
| phe.Fasting_rs3804620 | S8  | COPG2 | rs116079984 S8  | KPNA3         | 6.53E-06 | 1          | 3.16E-03 | 5.99E-10 | 0.024378    | 1.51E-06 |
| phe.Fasting_rs3804620 | S8  | COPG2 | rs74627895 S8   | TMEM64        | 2.27E-10 | 0.00926441 | 2.78E-07 | 7.80E-06 | 1           | 6.63E-03 |
| phe.Fasting_rs3856797 | S12 | VGLL4 | rs112027720 S7  | DIAPH1        | 5.93E-10 | 0.0242124  | 6.72E-07 | 8.45E-10 | 0.0344097   | 2.04E-06 |
| phe.Fasting_rs3856797 | S12 | VGLL4 | rs113219478 S7  | DIAPH1        | 5.93E-10 | 0.0242124  | 6.72E-07 | 8.45E-10 | 0.0344097   | 2.04E-06 |
| phe.Fasting_rs3856797 | S12 | VGLL4 | rs115787552 S5  | KPNA3         | 1.04E-06 | 1          | 6.28E-04 | 6.56E-08 | 1           | 9.81E-05 |
| phe.Fasting_rs3856797 | S12 | VGLL4 | rs115888477 S8  | NA            | 1.08E-05 | 1          | 4.91E-03 | 6.13E-06 | 1           | 5.42E-03 |
| phe.Fasting_rs3856797 | S12 | VGLL4 | rs116079984 S8  | KPNA3         | 1.04E-06 | 1          | 6.28E-04 | 4.60E-08 | 1           | 7.11E-05 |
| phe.Fasting_rs3856797 | S12 | VGLL4 | rs116279995 S20 | "PCDHGA4,Pi   | 2.49E-09 | 0.10151    | 2.56E-06 | 2.57E-09 | 0.104728    | 5.53E-06 |
| phe.Fasting_rs3856797 | S12 | VGLL4 | rs138136869 S7  | DIAPH1        | 9.74E-09 | 0.397611   | 9.11E-06 | 3.00E-06 | 1           | 2.92E-03 |
| phe.Fasting_rs3856797 | S12 | VGLL4 | rs138457103 S10 | DIAPH1        | 3.74E-09 | 0.152777   | 3.74E-06 | 2.66E-09 | 0.108448    | 5.71E-06 |
| phe.Fasting_rs3856797 | S12 | VGLL4 | rs138487229 S11 | DIAPH1        | 5.93E-10 | 0.0242124  | 6.72E-07 | 8.45E-10 | 0.0344097   | 2.04E-06 |
| phe.Fasting_rs3856797 | S12 | VGLL4 | rs138738950 S8  | "PCDHGB2,Pi   | 5.93E-10 | 0.0242124  | 6.72E-07 | 8.51E-10 | 0.0346469   | 2.06E-06 |
| phe.Fasting_rs3856797 | S12 | VGLL4 | rs139297927 S8  | DIAPH1        | 5.93E-10 | 0.0242124  | 6.72E-07 | 8.45E-10 | 0.0344097   | 2.04E-06 |
| phe.Fasting_rs3856797 | S12 | VGLL4 | rs139337303 S8  | DIAPH1        | 5.93E-10 | 0.0242124  | 6.72E-07 | 8.45E-10 | 0.0344097   | 2.04E-06 |
| phe.Fasting_rs3856797 | S12 | VGLL4 | rs139403963 S8  | DIAPH1        | 9.74E-09 | 0.397611   | 9.11E-06 | 3.00E-06 | 1           | 2.92E-03 |
| phe.Fasting_rs3856797 | S12 | VGLL4 | rs139621309 S18 | "LOC100505063 | 5.93E-10 | 0.0242124  | 6.72E-07 | 8.45E-10 | 0.0344097   | 2.04E-06 |
| phe.Fasting_rs3856797 | S12 | VGLL4 | rs139828110 S8  | DIAPH1        | 9.74E-09 | 0.397611   | 9.11E-06 | 3.00E-06 | 1           | 2.92E-03 |
| phe.Fasting_rs3856797 | S12 | VGLL4 | rs140070363 S8  | DIAPH1        | 5.93E-10 | 0.0242124  | 6.72E-07 | 8.45E-10 | 0.0344097   | 2.04E-06 |
| phe.Fasting_rs3856797 | S12 | VGLL4 | rs140524622 S7  | MRPL10        | 9.64E-08 | 1          | 7.38E-05 | 4.22E-08 | 1           | 6.59E-05 |
| phe.Fasting_rs3856797 | S12 | VGLL4 | rs140644750 S13 | DIAPH1        | 5.93E-10 | 0.0242124  | 6.72E-07 | 8.45E-10 | 0.0344097   | 2.04E-06 |
| phe.Fasting_rs3856797 | S12 | VGLL4 | rs141022544 S8  | DIAPH1        | 5.93E-10 | 0.0242124  | 6.72E-07 | 8.45E-10 | 0.0344097   | 2.04E-06 |
| phe.Fasting_rs3856797 | S12 | VGLL4 | rs141525984 S5  | DIAPH1        | 5.93E-10 | 0.0242124  | 6.72E-07 | 8.45E-10 | 0.0344097   | 2.04E-06 |

|              |           |     |       |                |              |          |            |             |          |            |          |
|--------------|-----------|-----|-------|----------------|--------------|----------|------------|-------------|----------|------------|----------|
| phe.Fasting_ | rs3856797 | S12 | VGLL4 | rs141692339S3  | "PCDHGA6,Pi  | 3.62E-10 | 0.0147832  | 4.24E-07    | 3.80E-09 | 0.154843   | 7.83E-06 |
| phe.Fasting_ | rs3856797 | S12 | VGLL4 | rs141926074S8  | ATE1         | 1.95E-06 | 1.00E+00   | 1.09E-03    | 5.37E-12 | 0.00021877 | 2.11E-08 |
| phe.Fasting_ | rs3856797 | S12 | VGLL4 | rs142480565S8  | DIAPH1       | 5.93E-10 | 2.42E-02   | 6.72E-07    | 8.45E-10 | 0.0344097  | 2.04E-06 |
| phe.Fasting_ | rs3856797 | S12 | VGLL4 | rs142718558S7  | "DIAPH1,LOC  | 5.93E-10 | 2.42E-02   | 6.72E-07    | 8.45E-10 | 0.0344097  | 2.04E-06 |
| phe.Fasting_ | rs3856797 | S12 | VGLL4 | rs142789100S8  | DIAPH1       | 9.74E-09 | 3.98E-01   | 9.11E-06    | 3.00E-06 | 1          | 2.92E-03 |
| phe.Fasting_ | rs3856797 | S12 | VGLL4 | rs142812798S7  | DIAPH1       | 9.74E-09 | 0.397611   | 9.11E-06    | 3.00E-06 | 1          | 2.92E-03 |
| phe.Fasting_ | rs3856797 | S12 | VGLL4 | rs143377827S13 | "DIAPH1,LOC  | 4.18E-09 | 1.71E-01   | 4.13E-06    | 9.78E-07 | 1          | 1.11E-03 |
| phe.Fasting_ | rs3856797 | S12 | VGLL4 | rs143691978S11 | DIAPH1       | 9.74E-09 | 3.98E-01   | 9.11E-06    | 2.93E-06 | 1          | 2.88E-03 |
| phe.Fasting_ | rs3856797 | S12 | VGLL4 | rs144081334S11 | DIAPH1       | 9.74E-09 | 0.397611   | 9.11E-06    | 2.93E-06 | 1          | 2.88E-03 |
| phe.Fasting_ | rs3856797 | S12 | VGLL4 | rs144613910S8  | DIAPH1       | 5.93E-10 | 0.0242124  | 6.72E-07    | 8.45E-10 | 0.0344097  | 2.04E-06 |
| phe.Fasting_ | rs3856797 | S12 | VGLL4 | rs145027704S11 | DIAPH1       | 9.74E-09 | 0.397611   | 9.11E-06    | 2.93E-06 | 1          | 2.88E-03 |
| phe.Fasting_ | rs3856797 | S12 | VGLL4 | rs146220673S7  | DIAPH1       | 5.93E-10 | 0.0242124  | 6.72E-07    | 8.45E-10 | 0.0344097  | 2.04E-06 |
| phe.Fasting_ | rs3856797 | S12 | VGLL4 | rs146622060S13 | DIAPH1       | 9.74E-09 | 3.98E-01   | 9.11E-06    | 2.93E-06 | 1          | 2.88E-03 |
| phe.Fasting_ | rs3856797 | S12 | VGLL4 | rs146815317S5  | KPNA3        | 1.04E-06 | 1.00E+00   | 6.28E-04    | 6.56E-08 | 1          | 9.81E-05 |
| phe.Fasting_ | rs3856797 | S12 | VGLL4 | rs146878162S7  | DIAPH1       | 5.93E-10 | 2.42E-02   | 6.72E-07    | 8.45E-10 | 0.0344097  | 2.04E-06 |
| phe.Fasting_ | rs3856797 | S12 | VGLL4 | rs147314451S8  | DIAPH1       | 5.93E-10 | 2.42E-02   | 6.72E-07    | 8.45E-10 | 0.0344097  | 2.04E-06 |
| phe.Fasting_ | rs3856797 | S12 | VGLL4 | rs147417996S7  | DIAPH1       | 9.74E-09 | 3.98E-01   | 9.11E-06    | 2.93E-06 | 1          | 2.88E-03 |
| phe.Fasting_ | rs3856797 | S12 | VGLL4 | rs147506725S21 | "PCDHGA1,Pi  | 2.49E-09 | 1.02E-01   | 2.56E-06    | 2.57E-09 | 0.104728   | 5.53E-06 |
| phe.Fasting_ | rs3856797 | S12 | VGLL4 | rs147646948S7  | "LOC10050505 | 5.93E-10 | 0.0242124  | 6.72E-07    | 8.45E-10 | 0.0344097  | 2.04E-06 |
| phe.Fasting_ | rs3856797 | S12 | VGLL4 | rs147677041S8  | DIAPH1       | 9.74E-09 | 0.397611   | 9.11E-06    | 3.00E-06 | 1          | 2.92E-03 |
| phe.Fasting_ | rs3856797 | S12 | VGLL4 | rs148116628S7  | DIAPH1       | 5.93E-10 | 0.0242124  | 6.72E-07    | 8.45E-10 | 0.0344097  | 2.04E-06 |
| phe.Fasting_ | rs3856797 | S12 | VGLL4 | rs148423011S7  | DIAPH1       | 5.93E-10 | 0.0242124  | 6.72E-07    | 8.45E-10 | 0.0344097  | 2.04E-06 |
| phe.Fasting_ | rs3856797 | S12 | VGLL4 | rs149019627S8  | DIAPH1       | 9.74E-09 | 0.397611   | 9.11E-06    | 3.00E-06 | 1          | 2.92E-03 |
| phe.Fasting_ | rs3856797 | S12 | VGLL4 | rs149075406S8  | DIAPH1       | 5.93E-10 | 0.0242124  | 6.72E-07    | 8.45E-10 | 0.0344097  | 2.04E-06 |
| phe.Fasting_ | rs3856797 | S12 | VGLL4 | rs149334783S8  | DIAPH1       | 5.93E-10 | 0.0242124  | 6.72E-07    | 8.45E-10 | 0.0344097  | 2.04E-06 |
| phe.Fasting_ | rs3856797 | S12 | VGLL4 | rs149553852S21 | "PCDHGA10,   | 2.49E-09 | 0.10151    | 2.56E-06    | 2.57E-09 | 0.104728   | 5.53E-06 |
| phe.Fasting_ | rs3856797 | S12 | VGLL4 | rs149716949S5  | DIAPH1       | 2.52E-11 | 0.00103004 | 3.65E-08    | 7.83E-10 | 0.0318834  | 1.93E-06 |
| phe.Fasting_ | rs3856797 | S12 | VGLL4 | rs149791570S5  | DIAPH1       | 9.74E-09 | 0.397611   | 9.11E-06    | 3.00E-06 | 1          | 2.92E-03 |
| phe.Fasting_ | rs3856797 | S12 | VGLL4 | rs150117838S8  | KPNA3        | 1.04E-06 | 1          | 0.000627812 | 6.46E-08 | 1          | 9.67E-05 |
| phe.Fasting_ | rs3856797 | S12 | VGLL4 | rs150452206S13 | "DIAPH1,LOC  | 5.93E-10 | 0.0242124  | 6.72E-07    | 8.45E-10 | 0.0344097  | 2.04E-06 |
| phe.Fasting_ | rs3856797 | S12 | VGLL4 | rs150675915S7  | DIAPH1       | 5.93E-10 | 0.0242124  | 6.72E-07    | 8.45E-10 | 0.0344097  | 2.04E-06 |
| phe.Fasting_ | rs3856797 | S12 | VGLL4 | rs150765570S7  | DIAPH1       | 5.93E-10 | 0.0242124  | 6.72E-07    | 8.45E-10 | 0.0344097  | 2.04E-06 |
| phe.Fasting_ | rs3856797 | S12 | VGLL4 | rs150992994S11 | "PCDHGA5,Pi  | 6.08E-10 | 0.0248395  | 6.87E-07    | 2.40E-09 | 0.0977664  | 5.20E-06 |
| phe.Fasting_ | rs3856797 | S12 | VGLL4 | rs151204700S8  | DIAPH1       | 5.93E-10 | 0.0242124  | 6.72E-07    | 8.45E-10 | 0.0344097  | 2.04E-06 |
| phe.Fasting_ | rs3856797 | S12 | VGLL4 | rs151330468S8  | DIAPH1       | 9.74E-09 | 0.397611   | 9.11E-06    | 2.93E-06 | 1          | 2.88E-03 |
| phe.Fasting_ | rs3856797 | S12 | VGLL4 | rs180772028S8  | "DIAPH1,LOC  | 5.93E-10 | 0.0242124  | 6.72E-07    | 8.45E-10 | 0.0344097  | 2.04E-06 |
| phe.Fasting_ | rs3856797 | S12 | VGLL4 | rs181224861S7  | DIAPH1       | 5.93E-10 | 0.0242124  | 6.72E-07    | 8.45E-10 | 0.0344097  | 2.04E-06 |
| phe.Fasting_ | rs3856797 | S12 | VGLL4 | rs181247960S21 | "PCDHGA9,Pi  | 2.49E-09 | 0.10151    | 2.56E-06    | 2.57E-09 | 0.104728   | 5.53E-06 |
| phe.Fasting_ | rs3856797 | S12 | VGLL4 | rs181824655S21 | "PCDHGB6,Pi  | 2.49E-09 | 0.10151    | 2.56E-06    | 2.57E-09 | 0.104728   | 5.53E-06 |
| phe.Fasting_ | rs3856797 | S12 | VGLL4 | rs182714699S8  | DIAPH1       | 5.93E-10 | 0.0242124  | 6.72E-07    | 8.45E-10 | 0.0344097  | 2.04E-06 |



|                        |     |       |                 |             |          |             |             |          |           |          |
|------------------------|-----|-------|-----------------|-------------|----------|-------------|-------------|----------|-----------|----------|
| phe.Fasting_rs3856797  | S12 | VGLL4 | rs182965141 S8  | DIAPH1      | 1.10E-08 | 4.47E-01    | 1.01E-05    | 4.28E-06 | 1         | 4.01E-03 |
| phe.Fasting_rs3856797  | S12 | VGLL4 | rs183597049 S7  | DIAPH1      | 5.93E-10 | 0.0242124   | 6.72E-07    | 8.45E-10 | 0.0344097 | 2.04E-06 |
| phe.Fasting_rs3856797  | S12 | VGLL4 | rs183980988 S2  | NA          | 5.93E-10 | 0.0242124   | 6.72E-07    | 8.45E-10 | 0.0344097 | 2.04E-06 |
| phe.Fasting_rs3856797  | S12 | VGLL4 | rs184233232 S7  | DIAPH1      | 5.93E-10 | 0.0242124   | 6.72E-07    | 8.45E-10 | 0.0344097 | 2.04E-06 |
| phe.Fasting_rs3856797  | S12 | VGLL4 | rs184509477 S13 | "PCDHGB4,PI | 5.93E-10 | 0.0242124   | 6.72E-07    | 8.45E-10 | 0.0344097 | 2.04E-06 |
| phe.Fasting_rs3856797  | S12 | VGLL4 | rs185069296 S15 | "LOC1005056 | 5.93E-10 | 0.0242124   | 6.72E-07    | 8.45E-10 | 0.0344097 | 2.04E-06 |
| phe.Fasting_rs3856797  | S12 | VGLL4 | rs185502834 S8  | DIAPH1      | 9.74E-09 | 0.397611    | 9.11E-06    | 3.00E-06 | 1         | 2.92E-03 |
| phe.Fasting_rs3856797  | S12 | VGLL4 | rs185759881 S7  | DIAPH1      | 5.93E-10 | 0.0242124   | 6.72E-07    | 8.45E-10 | 0.0344097 | 2.04E-06 |
| phe.Fasting_rs3856797  | S12 | VGLL4 | rs186288044 S21 | "PCDHGB4,PI | 2.49E-09 | 0.10151     | 2.56E-06    | 2.57E-09 | 0.104728  | 5.53E-06 |
| phe.Fasting_rs3856797  | S12 | VGLL4 | rs187000011 S11 | DIAPH1      | 5.93E-10 | 0.0242124   | 6.72E-07    | 8.45E-10 | 0.0344097 | 2.04E-06 |
| phe.Fasting_rs3856797  | S12 | VGLL4 | rs188981295 S5  | "RPS27AP10, | 5.93E-10 | 0.0242124   | 6.72E-07    | 8.45E-10 | 0.0344097 | 2.04E-06 |
| phe.Fasting_rs3856797  | S12 | VGLL4 | rs190559574 S7  | DIAPH1      | 9.74E-09 | 0.397611    | 9.11E-06    | 3.00E-06 | 1         | 2.92E-03 |
| phe.Fasting_rs3856797  | S12 | VGLL4 | rs191544043 S8  | DIAPH1      | 5.93E-10 | 0.0242124   | 6.72E-07    | 8.45E-10 | 0.0344097 | 2.04E-06 |
| phe.Fasting_rs3856797  | S12 | VGLL4 | rs191766712 S7  | DIAPH1      | 5.93E-10 | 0.0242124   | 6.72E-07    | 8.45E-10 | 0.0344097 | 2.04E-06 |
| phe.Fasting_rs3856797  | S12 | VGLL4 | rs192690040 S7  | DIAPH1      | 5.93E-10 | 0.0242124   | 6.72E-07    | 8.45E-10 | 0.0344097 | 2.04E-06 |
| phe.Fasting_rs3856797  | S12 | VGLL4 | rs192765219 S7  | DIAPH1      | 5.93E-10 | 0.0242124   | 6.72E-07    | 8.45E-10 | 0.0344097 | 2.04E-06 |
| phe.Fasting_rs3856797  | S12 | VGLL4 | rs192770525 S7  | DIAPH1      | 5.93E-10 | 0.0242124   | 6.72E-07    | 8.45E-10 | 0.0344097 | 2.04E-06 |
| phe.Fasting_rs3856797  | S12 | VGLL4 | rs35990401 S7   | DIAPH1      | 1.19E-09 | 0.0485693   | 1.29E-06    | 1.99E-09 | 0.0810465 | 4.40E-06 |
| phe.Fasting_rs3856797  | S12 | VGLL4 | rs55900860 S7   | DIAPH1      | 9.74E-09 | 0.397611    | 9.11E-06    | 3.00E-06 | 1         | 2.92E-03 |
| phe.Fasting_rs3856797  | S12 | VGLL4 | rs57503635 S3   | NA          | 1.62E-09 | 0.0660086   | 1.71E-06    | 1.51E-08 | 0.613074  | 2.67E-05 |
| phe.Fasting_rs3856797  | S12 | VGLL4 | rs60011869 S16  | NA          | 4.55E-06 | 1           | 0.00229127  | 1.05E-07 | 1         | 1.47E-04 |
| phe.Fasting_rs3856797  | S12 | VGLL4 | rs7256517 S7    | CYTH2       | 1.10E-07 | 1           | 8.33E-05    | 7.04E-06 | 1         | 6.10E-03 |
| phe.Fasting_rs3856797  | S12 | VGLL4 | rs73392640 S8   | POLR3B      | 9.37E-07 | 1           | 0.000571965 | 8.57E-07 | 1         | 9.81E-04 |
| phe.Fasting_rs3856797  | S12 | VGLL4 | rs73794928 S13  | "PCDHGA9,PI | 1.03E-05 | 1           | 0.00470297  | 1.53E-07 | 1         | 2.08E-04 |
| phe.Fasting_rs3856797  | S12 | VGLL4 | rs75949566 S5   | TMEM64      | 1.51E-09 | 0.06186     | 1.61E-06    | 1.00E-05 | 1         | 8.19E-03 |
| phe.Fasting_rs3856797  | S12 | VGLL4 | rs77798597 S7   | KPNA3       | 1.04E-06 | 1           | 0.000627812 | 6.46E-08 | 1         | 9.67E-05 |
| phe.Fasting_rs3856797  | S12 | VGLL4 | rs77845645 S21  | NA          | 3.28E-12 | 0.00013382  | 5.97E-09    | 5.58E-06 | 1         | 5.01E-03 |
| phe.Fasting_rs3856797  | S12 | VGLL4 | rs78736524 S5   | KPNA3       | 1.04E-06 | 1           | 0.000627812 | 6.56E-08 | 1         | 9.81E-05 |
| phe.Fasting_rs3856797  | S12 | VGLL4 | rs79517926 S15  | "DIAPH1,LOC | 9.48E-11 | 0.00387325  | 1.23E-07    | 2.54E-10 | 0.0103297 | 6.98E-07 |
| phe.Fasting_rs3856797  | S12 | VGLL4 | rs79781495 S8   | KPNA3       | 1.04E-06 | 1           | 0.000627812 | 6.46E-08 | 1         | 9.67E-05 |
| phe.Fasting_rs3856797  | S12 | VGLL4 | rs80332465 S5   | KPNA3       | 1.06E-06 | 1           | 0.000636918 | 6.52E-08 | 1         | 9.75E-05 |
| phe.Fasting_rs3856797  | S12 | VGLL4 | rs80334773 S5   | KPNA3       | 1.06E-06 | 1           | 6.37E-04    | 6.52E-08 | 1         | 9.75E-05 |
| phe.Fasting_rs4732511  | S13 | POR   | rs141926074 S8  | ATE1        | 1.01E-13 | 4.12E-06    | 2.29E-10    | 4.16E-07 | 1         | 5.06E-04 |
| phe.Fasting_rs4838224  | S14 | NA    | rs140524622 S7  | MRPL10      | 9.42E-07 | 1.00E+00    | 5.74E-04    | 7.22E-08 | 1         | 1.06E-04 |
| phe.Fasting_rs55741453 | S8  | NEK1  | rs112027720 S7  | DIAPH1      | 9.17E-12 | 3.74E-04    | 1.48E-08    | 2.23E-08 | 0.908274  | 3.74E-05 |
| phe.Fasting_rs55741453 | S8  | NEK1  | rs112089881 S8  | ZFAND4      | 1.84E-18 | 7.51E-11    | 3.89E-14    | 5.67E-09 | 0.230592  | 1.11E-05 |
| phe.Fasting_rs55741453 | S8  | NEK1  | rs113219478 S7  | DIAPH1      | 9.17E-12 | 0.000374383 | 1.48E-08    | 2.23E-08 | 0.908274  | 3.74E-05 |
| phe.Fasting_rs55741453 | S8  | NEK1  | rs113357907 S24 | ISL1        | 6.12E-18 | 2.50E-10    | 7.50E-14    | 9.34E-16 | 3.80E-08  | 1.16E-11 |
| phe.Fasting_rs55741453 | S8  | NEK1  | rs115787552 S5  | KPNA3       | 3.50E-16 | 1.43E-08    | 1.15E-12    | 2.15E-07 | 1         | 2.81E-04 |
| phe.Fasting_rs55741453 | S8  | NEK1  | rs115888477 S8  | NA          | 2.70E-15 | 1.10E-07    | 7.57E-12    | 1.63E-08 | 0.66442   | 2.86E-05 |

|                        |    |      |                 |             |          |             |            |          |            |          |
|------------------------|----|------|-----------------|-------------|----------|-------------|------------|----------|------------|----------|
| phe.Fasting_rs55741453 | S8 | NEK1 | rs116011837 S9  | BRD2        | 2.29E-17 | 9.34E-10    | 1.45E-13   | 2.21E-10 | 0.00900315 | 6.20E-07 |
| phe.Fasting_rs55741453 | S8 | NEK1 | rs116079984 S8  | KPNA3       | 3.50E-16 | 1.43E-08    | 1.15E-12   | 2.52E-07 | 1          | 3.25E-04 |
| phe.Fasting_rs55741453 | S8 | NEK1 | rs116120727 S9  | BRD2        | 2.29E-17 | 9.34E-10    | 1.45E-13   | 2.21E-10 | 0.00900315 | 6.20E-07 |
| phe.Fasting_rs55741453 | S8 | NEK1 | rs116279995 S20 | "PCDHGA4,Pi | 2.15E-05 | 1           | 0.00887266 | 2.34E-07 | 1          | 3.04E-04 |
| phe.Fasting_rs55741453 | S8 | NEK1 | rs138090701 S5  | HDAC3       | 1.02E-12 | 4.17E-05    | 2.10E-09   | 1.29E-08 | 0.523399   | 2.33E-05 |
| phe.Fasting_rs55741453 | S8 | NEK1 | rs138136869 S7  | DIAPH1      | 1.65E-12 | 6.74E-05    | 3.16E-09   | 3.12E-09 | 0.127195   | 6.59E-06 |
| phe.Fasting_rs55741453 | S8 | NEK1 | rs138457103 S10 | DIAPH1      | 5.43E-12 | 0.000221795 | 9.60E-09   | 2.09E-08 | 0.850097   | 3.57E-05 |
| phe.Fasting_rs55741453 | S8 | NEK1 | rs138487229 S11 | DIAPH1      | 9.17E-12 | 0.000374383 | 1.48E-08   | 2.23E-08 | 0.908274   | 3.74E-05 |
| phe.Fasting_rs55741453 | S8 | NEK1 | rs138738950 S8  | "PCDHGB2,Pi | 9.17E-12 | 0.000374383 | 1.48E-08   | 2.22E-08 | 0.904374   | 3.74E-05 |
| phe.Fasting_rs55741453 | S8 | NEK1 | rs139297927 S8  | DIAPH1      | 9.17E-12 | 0.000374383 | 1.48E-08   | 2.23E-08 | 0.908274   | 3.74E-05 |
| phe.Fasting_rs55741453 | S8 | NEK1 | rs139337303 S8  | DIAPH1      | 9.17E-12 | 0.000374383 | 1.48E-08   | 2.23E-08 | 0.908274   | 3.74E-05 |
| phe.Fasting_rs55741453 | S8 | NEK1 | rs139403963 S8  | DIAPH1      | 1.65E-12 | 6.74E-05    | 3.16E-09   | 3.12E-09 | 0.127195   | 6.59E-06 |
| phe.Fasting_rs55741453 | S8 | NEK1 | rs139621309 S18 | "LOC1005056 | 9.17E-12 | 0.000374383 | 1.48E-08   | 2.23E-08 | 0.908274   | 3.74E-05 |
| phe.Fasting_rs55741453 | S8 | NEK1 | rs139828110 S8  | DIAPH1      | 1.65E-12 | 6.74E-05    | 3.16E-09   | 3.12E-09 | 0.127195   | 6.59E-06 |
| phe.Fasting_rs55741453 | S8 | NEK1 | rs140070363 S8  | DIAPH1      | 9.17E-12 | 0.000374383 | 1.48E-08   | 2.23E-08 | 0.908274   | 3.74E-05 |
| phe.Fasting_rs55741453 | S8 | NEK1 | rs140644750 S13 | DIAPH1      | 9.17E-12 | 0.000374383 | 1.48E-08   | 2.23E-08 | 0.908274   | 3.74E-05 |
| phe.Fasting_rs55741453 | S8 | NEK1 | rs141022544 S8  | DIAPH1      | 9.17E-12 | 0.000374383 | 1.48E-08   | 2.23E-08 | 0.908274   | 3.74E-05 |
| phe.Fasting_rs55741453 | S8 | NEK1 | rs141525984 S5  | DIAPH1      | 9.17E-12 | 0.000374383 | 1.48E-08   | 2.23E-08 | 0.908274   | 3.74E-05 |
| phe.Fasting_rs55741453 | S8 | NEK1 | rs141926074 S8  | ATE1        | 1.33E-06 | 1           | 7.83E-04   | 1.98E-14 | 8.07E-07   | 1.59E-10 |
| phe.Fasting_rs55741453 | S8 | NEK1 | rs142480565 S8  | DIAPH1      | 9.17E-12 | 0.000374383 | 1.48E-08   | 2.23E-08 | 0.908274   | 3.74E-05 |
| phe.Fasting_rs55741453 | S8 | NEK1 | rs142718558 S7  | "DIAPH1,LOC | 9.17E-12 | 0.000374383 | 1.48E-08   | 2.23E-08 | 0.908274   | 3.74E-05 |
| phe.Fasting_rs55741453 | S8 | NEK1 | rs142789100 S8  | DIAPH1      | 1.65E-12 | 6.74E-05    | 3.16E-09   | 3.12E-09 | 0.127195   | 6.59E-06 |
| phe.Fasting_rs55741453 | S8 | NEK1 | rs142812798 S7  | DIAPH1      | 1.65E-12 | 6.74E-05    | 3.16E-09   | 3.12E-09 | 0.127195   | 6.59E-06 |
| phe.Fasting_rs55741453 | S8 | NEK1 | rs143377827 S13 | "DIAPH1,LOC | 1.45E-12 | 5.90E-05    | 2.83E-09   | 2.57E-09 | 0.104505   | 5.52E-06 |
| phe.Fasting_rs55741453 | S8 | NEK1 | rs143691978 S11 | DIAPH1      | 1.65E-12 | 6.74E-05    | 3.16E-09   | 5.06E-09 | 0.206028   | 1.01E-05 |
| phe.Fasting_rs55741453 | S8 | NEK1 | rs144081334 S11 | DIAPH1      | 1.65E-12 | 6.74E-05    | 3.16E-09   | 5.06E-09 | 0.206028   | 1.01E-05 |
| phe.Fasting_rs55741453 | S8 | NEK1 | rs144613910 S8  | DIAPH1      | 9.17E-12 | 3.74E-04    | 1.48E-08   | 2.23E-08 | 0.908274   | 3.74E-05 |
| phe.Fasting_rs55741453 | S8 | NEK1 | rs145027704 S11 | DIAPH1      | 1.65E-12 | 6.74E-05    | 3.16E-09   | 5.06E-09 | 0.206028   | 1.01E-05 |
| phe.Fasting_rs55741453 | S8 | NEK1 | rs146220673 S7  | DIAPH1      | 9.17E-12 | 3.74E-04    | 1.48E-08   | 2.23E-08 | 0.908274   | 3.74E-05 |
| phe.Fasting_rs55741453 | S8 | NEK1 | rs146622060 S13 | DIAPH1      | 1.65E-12 | 6.74E-05    | 3.16E-09   | 5.06E-09 | 0.206028   | 1.01E-05 |
| phe.Fasting_rs55741453 | S8 | NEK1 | rs146815317 S5  | KPNA3       | 3.50E-16 | 1.43E-08    | 1.15E-12   | 2.15E-07 | 1          | 2.81E-04 |
| phe.Fasting_rs55741453 | S8 | NEK1 | rs146878162 S7  | DIAPH1      | 9.17E-12 | 0.000374383 | 1.48E-08   | 2.23E-08 | 0.908274   | 3.74E-05 |
| phe.Fasting_rs55741453 | S8 | NEK1 | rs1470889 S5    | ZC3H3       | 3.60E-08 | 1           | 3.04E-05   | 6.78E-07 | 1          | 7.92E-04 |
| phe.Fasting_rs55741453 | S8 | NEK1 | rs1470890 S5    | ZC3H3       | 3.60E-08 | 1           | 3.04E-05   | 6.78E-07 | 1          | 7.92E-04 |
| phe.Fasting_rs55741453 | S8 | NEK1 | rs147314451 S8  | DIAPH1      | 9.17E-12 | 0.000374383 | 1.48E-08   | 2.23E-08 | 0.908274   | 3.74E-05 |
| phe.Fasting_rs55741453 | S8 | NEK1 | rs147417996 S7  | DIAPH1      | 1.65E-12 | 6.74E-05    | 3.16E-09   | 5.06E-09 | 0.206028   | 1.01E-05 |
| phe.Fasting_rs55741453 | S8 | NEK1 | rs147506725 S21 | "PCDHGA1,Pi | 2.15E-05 | 1           | 0.00887266 | 2.34E-07 | 1          | 3.04E-04 |
| phe.Fasting_rs55741453 | S8 | NEK1 | rs147646948 S7  | "LOC1005056 | 9.17E-12 | 0.000374383 | 1.48E-08   | 2.23E-08 | 0.908274   | 3.74E-05 |
| phe.Fasting_rs55741453 | S8 | NEK1 | rs147677041 S8  | DIAPH1      | 1.65E-12 | 6.74E-05    | 3.16E-09   | 3.12E-09 | 0.127195   | 6.59E-06 |
| phe.Fasting_rs55741453 | S8 | NEK1 | rs148116628 S7  | DIAPH1      | 9.17E-12 | 3.74E-04    | 1.48E-08   | 2.23E-08 | 0.908274   | 3.74E-05 |

|                        |    |      |             |     |             |          |             |            |          |           |          |
|------------------------|----|------|-------------|-----|-------------|----------|-------------|------------|----------|-----------|----------|
| phe.Fasting_rs55741453 | S8 | NEK1 | rs148423011 | S7  | DIAPH1      | 9.17E-12 | 0.000374383 | 1.48E-08   | 2.23E-08 | 0.908274  | 3.74E-05 |
| phe.Fasting_rs55741453 | S8 | NEK1 | rs149019627 | S8  | DIAPH1      | 1.65E-12 | 6.74E-05    | 3.16E-09   | 3.12E-09 | 0.127195  | 6.59E-06 |
| phe.Fasting_rs55741453 | S8 | NEK1 | rs149075406 | S8  | DIAPH1      | 9.17E-12 | 0.000374383 | 1.48E-08   | 2.23E-08 | 0.908274  | 3.74E-05 |
| phe.Fasting_rs55741453 | S8 | NEK1 | rs149334783 | S8  | DIAPH1      | 9.17E-12 | 0.000374383 | 1.48E-08   | 2.23E-08 | 0.908274  | 3.74E-05 |
| phe.Fasting_rs55741453 | S8 | NEK1 | rs149553852 | S21 | "PCDHGA10,  | 2.15E-05 | 1           | 0.00887266 | 2.34E-07 | 1         | 3.04E-04 |
| phe.Fasting_rs55741453 | S8 | NEK1 | rs149716949 | S5  | DIAPH1      | 7.67E-13 | 3.13E-05    | 1.59E-09   | 2.72E-09 | 0.110842  | 5.82E-06 |
| phe.Fasting_rs55741453 | S8 | NEK1 | rs149791570 | S5  | DIAPH1      | 1.65E-12 | 6.74E-05    | 3.16E-09   | 3.12E-09 | 0.127195  | 6.59E-06 |
| phe.Fasting_rs55741453 | S8 | NEK1 | rs150117838 | S8  | KPNA3       | 3.50E-16 | 1.43E-08    | 1.15E-12   | 2.05E-07 | 1         | 2.70E-04 |
| phe.Fasting_rs55741453 | S8 | NEK1 | rs150452206 | S13 | "DIAPH1,LOC | 9.17E-12 | 0.000374383 | 1.48E-08   | 2.23E-08 | 0.908274  | 3.74E-05 |
| phe.Fasting_rs55741453 | S8 | NEK1 | rs150675915 | S7  | DIAPH1      | 9.17E-12 | 0.000374383 | 1.48E-08   | 2.23E-08 | 0.908274  | 3.74E-05 |
| phe.Fasting_rs55741453 | S8 | NEK1 | rs150765570 | S7  | DIAPH1      | 9.17E-12 | 0.000374383 | 1.48E-08   | 2.23E-08 | 0.908274  | 3.74E-05 |
| phe.Fasting_rs55741453 | S8 | NEK1 | rs150992994 | S11 | "PCDHGA5,PI | 9.47E-12 | 0.000386737 | 1.52E-08   | 2.14E-08 | 0.869105  | 3.65E-05 |
| phe.Fasting_rs55741453 | S8 | NEK1 | rs151204700 | S8  | DIAPH1      | 9.17E-12 | 0.000374383 | 1.48E-08   | 2.23E-08 | 0.908274  | 3.74E-05 |
| phe.Fasting_rs55741453 | S8 | NEK1 | rs151330468 | S8  | DIAPH1      | 1.65E-12 | 6.74E-05    | 3.16E-09   | 5.06E-09 | 0.206028  | 1.01E-05 |
| phe.Fasting_rs55741453 | S8 | NEK1 | rs16894241  | S4  | HIST1H2BK   | 5.24E-08 | 1           | 4.28E-05   | 5.37E-07 | 1         | 6.38E-04 |
| phe.Fasting_rs55741453 | S8 | NEK1 | rs180772028 | S8  | "DIAPH1,LOC | 9.17E-12 | 0.000374383 | 1.48E-08   | 2.23E-08 | 0.908274  | 3.74E-05 |
| phe.Fasting_rs55741453 | S8 | NEK1 | rs181224861 | S7  | DIAPH1      | 9.17E-12 | 0.000374383 | 1.48E-08   | 2.23E-08 | 0.908274  | 3.74E-05 |
| phe.Fasting_rs55741453 | S8 | NEK1 | rs181247960 | S21 | "PCDHGA9,PI | 2.15E-05 | 1           | 0.00887266 | 2.34E-07 | 1         | 3.04E-04 |
| phe.Fasting_rs55741453 | S8 | NEK1 | rs181824655 | S21 | "PCDHGB6,PI | 2.15E-05 | 1           | 0.00887266 | 2.34E-07 | 1         | 3.04E-04 |
| phe.Fasting_rs55741453 | S8 | NEK1 | rs182714699 | S8  | DIAPH1      | 9.17E-12 | 0.000374383 | 1.48E-08   | 2.23E-08 | 0.908274  | 3.74E-05 |
| phe.Fasting_rs55741453 | S8 | NEK1 | rs182965141 | S8  | DIAPH1      | 2.01E-12 | 8.19E-05    | 3.80E-09   | 1.71E-09 | 0.0696833 | 3.83E-06 |
| phe.Fasting_rs55741453 | S8 | NEK1 | rs183597049 | S7  | DIAPH1      | 9.17E-12 | 0.000374383 | 1.48E-08   | 2.23E-08 | 0.908274  | 3.74E-05 |
| phe.Fasting_rs55741453 | S8 | NEK1 | rs183980988 | S2  | NA          | 9.17E-12 | 0.000374383 | 1.48E-08   | 2.23E-08 | 0.908274  | 3.74E-05 |
| phe.Fasting_rs55741453 | S8 | NEK1 | rs184233232 | S7  | DIAPH1      | 9.17E-12 | 0.000374383 | 1.48E-08   | 2.23E-08 | 0.908274  | 3.74E-05 |
| phe.Fasting_rs55741453 | S8 | NEK1 | rs184509477 | S13 | "PCDHGB4,PI | 9.17E-12 | 0.000374383 | 1.48E-08   | 2.23E-08 | 0.908274  | 3.74E-05 |
| phe.Fasting_rs55741453 | S8 | NEK1 | rs185069296 | S15 | "LOC1005056 | 9.17E-12 | 0.000374383 | 1.48E-08   | 2.23E-08 | 0.908274  | 3.74E-05 |
| phe.Fasting_rs55741453 | S8 | NEK1 | rs185502834 | S8  | DIAPH1      | 1.65E-12 | 6.74E-05    | 3.16E-09   | 3.12E-09 | 0.127195  | 6.59E-06 |
| phe.Fasting_rs55741453 | S8 | NEK1 | rs185759881 | S7  | DIAPH1      | 9.17E-12 | 0.000374383 | 1.48E-08   | 2.23E-08 | 0.908274  | 3.74E-05 |
| phe.Fasting_rs55741453 | S8 | NEK1 | rs186288044 | S21 | "PCDHGB4,PI | 2.15E-05 | 1           | 0.00887266 | 2.34E-07 | 1         | 3.04E-04 |
| phe.Fasting_rs55741453 | S8 | NEK1 | rs187000011 | S11 | DIAPH1      | 9.17E-12 | 0.000374383 | 1.48E-08   | 2.23E-08 | 0.908274  | 3.74E-05 |
| phe.Fasting_rs55741453 | S8 | NEK1 | rs188981295 | S5  | "RPS27AP10, | 9.17E-12 | 0.000374383 | 1.48E-08   | 2.23E-08 | 0.908274  | 3.74E-05 |
| phe.Fasting_rs55741453 | S8 | NEK1 | rs190559574 | S7  | DIAPH1      | 1.65E-12 | 6.74E-05    | 3.16E-09   | 3.12E-09 | 0.127195  | 6.59E-06 |
| phe.Fasting_rs55741453 | S8 | NEK1 | rs191544043 | S8  | DIAPH1      | 9.17E-12 | 0.000374383 | 1.48E-08   | 2.23E-08 | 0.908274  | 3.74E-05 |
| phe.Fasting_rs55741453 | S8 | NEK1 | rs191766712 | S7  | DIAPH1      | 9.17E-12 | 0.000374383 | 1.48E-08   | 2.23E-08 | 0.908274  | 3.74E-05 |
| phe.Fasting_rs55741453 | S8 | NEK1 | rs192690040 | S7  | DIAPH1      | 9.17E-12 | 0.000374383 | 1.48E-08   | 2.23E-08 | 0.908274  | 3.74E-05 |
| phe.Fasting_rs55741453 | S8 | NEK1 | rs192765219 | S7  | DIAPH1      | 9.17E-12 | 0.000374383 | 1.48E-08   | 2.23E-08 | 0.908274  | 3.74E-05 |
| phe.Fasting_rs55741453 | S8 | NEK1 | rs192770525 | S7  | DIAPH1      | 9.17E-12 | 0.000374383 | 1.48E-08   | 2.23E-08 | 0.908274  | 3.74E-05 |
| phe.Fasting_rs55741453 | S8 | NEK1 | rs2924507   | S5  | ZC3H3       | 3.60E-08 | 1           | 3.04E-05   | 6.78E-07 | 1         | 7.92E-04 |
| phe.Fasting_rs55741453 | S8 | NEK1 | rs2924508   | S8  | ZC3H3       | 3.60E-08 | 1           | 3.04E-05   | 9.52E-07 | 1         | 1.08E-03 |
| phe.Fasting_rs55741453 | S8 | NEK1 | rs2924511   | S7  | ZC3H3       | 3.60E-08 | 1           | 3.04E-05   | 5.76E-07 | 1         | 6.81E-04 |

|                        |    |      |             |     |             |          |             |            |          |            |          |
|------------------------|----|------|-------------|-----|-------------|----------|-------------|------------|----------|------------|----------|
| phe.Fasting_rs55741453 | S8 | NEK1 | rs2924512   | S7  | ZC3H3       | 4.02E-08 | 1           | 3.37E-05   | 7.17E-07 | 1          | 8.34E-04 |
| phe.Fasting_rs55741453 | S8 | NEK1 | rs2956376   | S8  | ZC3H3       | 3.60E-08 | 1           | 3.04E-05   | 3.89E-07 | 1          | 4.76E-04 |
| phe.Fasting_rs55741453 | S8 | NEK1 | rs2980270   | S7  | ZC3H3       | 3.60E-08 | 1           | 3.04E-05   | 3.89E-07 | 1          | 4.76E-04 |
| phe.Fasting_rs55741453 | S8 | NEK1 | rs2980272   | S7  | ZC3H3       | 4.02E-08 | 1           | 3.37E-05   | 7.52E-07 | 1          | 8.70E-04 |
| phe.Fasting_rs55741453 | S8 | NEK1 | rs2980275   | S5  | ZC3H3       | 3.60E-08 | 1           | 3.04E-05   | 6.78E-07 | 1          | 7.92E-04 |
| phe.Fasting_rs55741453 | S8 | NEK1 | rs35990401  | S7  | DIAPH1      | 8.40E-12 | 0.000343123 | 1.39E-08   | 8.38E-09 | 0.340996   | 1.59E-05 |
| phe.Fasting_rs55741453 | S8 | NEK1 | rs366767    | S5  | ZC3H3       | 6.34E-08 | 1           | 5.08E-05   | 4.19E-07 | 1          | 5.09E-04 |
| phe.Fasting_rs55741453 | S8 | NEK1 | rs55900860  | S7  | DIAPH1      | 1.65E-12 | 6.74E-05    | 3.16E-09   | 3.12E-09 | 0.127195   | 6.59E-06 |
| phe.Fasting_rs55741453 | S8 | NEK1 | rs6881310   | S23 | ISL1        | 4.23E-17 | 1.73E-09    | 2.22E-13   | 2.34E-12 | 9.53E-05   | 1.01E-08 |
| phe.Fasting_rs55741453 | S8 | NEK1 | rs73619637  | S8  | NA          | 1.02E-16 | 4.15E-09    | 4.31E-13   | 1.35E-08 | 0.549186   | 2.43E-05 |
| phe.Fasting_rs55741453 | S8 | NEK1 | rs77444916  | S23 | LOC642366   | 1.50E-17 | 6.11E-10    | 1.18E-13   | 8.75E-16 | 3.56E-08   | 1.16E-11 |
| phe.Fasting_rs55741453 | S8 | NEK1 | rs77798597  | S7  | KPNA3       | 3.50E-16 | 1.43E-08    | 1.15E-12   | 2.05E-07 | 1          | 2.70E-04 |
| phe.Fasting_rs55741453 | S8 | NEK1 | rs78703708  | S7  | FAF2        | 9.25E-18 | 3.78E-10    | 9.24E-14   | 2.08E-07 | 1          | 2.74E-04 |
| phe.Fasting_rs55741453 | S8 | NEK1 | rs78736524  | S5  | KPNA3       | 3.50E-16 | 1.43E-08    | 1.15E-12   | 2.15E-07 | 1          | 2.81E-04 |
| phe.Fasting_rs55741453 | S8 | NEK1 | rs79517926  | S15 | "DIAPH1,LOC | 2.69E-12 | 0.000109672 | 4.97E-09   | 2.29E-09 | 0.0931701  | 4.98E-06 |
| phe.Fasting_rs55741453 | S8 | NEK1 | rs79781495  | S8  | KPNA3       | 3.50E-16 | 1.43E-08    | 1.15E-12   | 2.05E-07 | 1          | 2.70E-04 |
| phe.Fasting_rs55741453 | S8 | NEK1 | rs80258830  | S24 | LOC642366   | 1.50E-17 | 6.11E-10    | 1.18E-13   | 8.75E-16 | 3.56E-08   | 1.16E-11 |
| phe.Fasting_rs55741453 | S8 | NEK1 | rs80332465  | S5  | KPNA3       | 3.75E-16 | 1.53E-08    | 1.22E-12   | 2.14E-07 | 1          | 2.81E-04 |
| phe.Fasting_rs55741453 | S8 | NEK1 | rs80334773  | S5  | KPNA3       | 3.75E-16 | 1.53E-08    | 1.22E-12   | 2.14E-07 | 1          | 2.81E-04 |
| phe.Fasting_rs55765964 | S8 | NEK1 | rs112027720 | S7  | DIAPH1      | 1.16E-11 | 0.000473748 | 1.82E-08   | 2.23E-08 | 0.908274   | 3.74E-05 |
| phe.Fasting_rs55765964 | S8 | NEK1 | rs112089881 | S8  | ZFAND4      | 1.88E-18 | 7.69E-11    | 3.95E-14   | 5.67E-09 | 0.230592   | 1.11E-05 |
| phe.Fasting_rs55765964 | S8 | NEK1 | rs113219478 | S7  | DIAPH1      | 1.16E-11 | 0.000473748 | 1.82E-08   | 2.23E-08 | 0.908274   | 3.74E-05 |
| phe.Fasting_rs55765964 | S8 | NEK1 | rs113357907 | S24 | ISL1        | 6.21E-18 | 2.54E-10    | 7.56E-14   | 9.34E-16 | 3.80E-08   | 1.16E-11 |
| phe.Fasting_rs55765964 | S8 | NEK1 | rs115787552 | S5  | KPNA3       | 3.65E-16 | 1.49E-08    | 1.19E-12   | 2.15E-07 | 1          | 2.81E-04 |
| phe.Fasting_rs55765964 | S8 | NEK1 | rs115888477 | S8  | NA          | 2.82E-15 | 1.15E-07    | 7.89E-12   | 1.63E-08 | 0.66442    | 2.86E-05 |
| phe.Fasting_rs55765964 | S8 | NEK1 | rs116011837 | S9  | BRD2        | 3.25E-08 | 1           | 2.77E-05   | 2.21E-10 | 0.00900315 | 6.20E-07 |
| phe.Fasting_rs55765964 | S8 | NEK1 | rs116079984 | S8  | KPNA3       | 3.65E-16 | 1.49E-08    | 1.19E-12   | 2.52E-07 | 1          | 3.25E-04 |
| phe.Fasting_rs55765964 | S8 | NEK1 | rs116120727 | S9  | BRD2        | 3.25E-08 | 1           | 2.77E-05   | 2.21E-10 | 0.00900315 | 6.20E-07 |
| phe.Fasting_rs55765964 | S8 | NEK1 | rs116279995 | S20 | "PCDHGA4,PI | 2.46E-05 | 1           | 0.00997154 | 2.34E-07 | 1          | 3.04E-04 |
| phe.Fasting_rs55765964 | S8 | NEK1 | rs138090701 | S5  | HDAC3       | 1.28E-12 | 5.21E-05    | 2.52E-09   | 1.29E-08 | 0.523399   | 2.33E-05 |
| phe.Fasting_rs55765964 | S8 | NEK1 | rs138136869 | S7  | DIAPH1      | 2.06E-12 | 8.41E-05    | 3.89E-09   | 3.12E-09 | 0.127195   | 6.59E-06 |
| phe.Fasting_rs55765964 | S8 | NEK1 | rs138457103 | S10 | DIAPH1      | 6.92E-12 | 0.000282767 | 1.19E-08   | 2.09E-08 | 0.850097   | 3.57E-05 |
| phe.Fasting_rs55765964 | S8 | NEK1 | rs138487229 | S11 | DIAPH1      | 1.16E-11 | 0.000473748 | 1.82E-08   | 2.23E-08 | 0.908274   | 3.74E-05 |
| phe.Fasting_rs55765964 | S8 | NEK1 | rs138738950 | S8  | "PCDHGB2,PI | 1.16E-11 | 0.000473748 | 1.82E-08   | 2.22E-08 | 0.904374   | 3.74E-05 |
| phe.Fasting_rs55765964 | S8 | NEK1 | rs139297927 | S8  | DIAPH1      | 1.16E-11 | 0.000473748 | 1.82E-08   | 2.23E-08 | 0.908274   | 3.74E-05 |
| phe.Fasting_rs55765964 | S8 | NEK1 | rs139337303 | S8  | DIAPH1      | 1.16E-11 | 0.000473748 | 1.82E-08   | 2.23E-08 | 0.908274   | 3.74E-05 |
| phe.Fasting_rs55765964 | S8 | NEK1 | rs139403963 | S8  | DIAPH1      | 2.06E-12 | 8.41E-05    | 3.89E-09   | 3.12E-09 | 0.127195   | 6.59E-06 |
| phe.Fasting_rs55765964 | S8 | NEK1 | rs139621309 | S18 | "LOC1005050 | 1.16E-11 | 0.000473748 | 1.82E-08   | 2.23E-08 | 0.908274   | 3.74E-05 |
| phe.Fasting_rs55765964 | S8 | NEK1 | rs139828110 | S8  | DIAPH1      | 2.06E-12 | 8.41E-05    | 3.89E-09   | 3.12E-09 | 0.127195   | 6.59E-06 |
| phe.Fasting_rs55765964 | S8 | NEK1 | rs140070363 | S8  | DIAPH1      | 1.16E-11 | 0.000473748 | 1.82E-08   | 2.23E-08 | 0.908274   | 3.74E-05 |

|                        |    |      |                |             |          |             |             |          |          |          |
|------------------------|----|------|----------------|-------------|----------|-------------|-------------|----------|----------|----------|
| phe.Fasting_rs55765964 | S8 | NEK1 | rs140644750S13 | DIAPH1      | 1.16E-11 | 0.000473748 | 1.82E-08    | 2.23E-08 | 0.908274 | 3.74E-05 |
| phe.Fasting_rs55765964 | S8 | NEK1 | rs141022544S8  | DIAPH1      | 1.16E-11 | 0.000473748 | 1.82E-08    | 2.23E-08 | 0.908274 | 3.74E-05 |
| phe.Fasting_rs55765964 | S8 | NEK1 | rs141525984S5  | DIAPH1      | 1.16E-11 | 0.000473748 | 1.82E-08    | 2.23E-08 | 0.908274 | 3.74E-05 |
| phe.Fasting_rs55765964 | S8 | NEK1 | rs141926074S8  | ATE1        | 1.49E-06 | 1           | 0.000866641 | 1.98E-14 | 8.07E-07 | 1.59E-10 |
| phe.Fasting_rs55765964 | S8 | NEK1 | rs142480565S8  | DIAPH1      | 1.16E-11 | 0.000473748 | 1.82E-08    | 2.23E-08 | 0.908274 | 3.74E-05 |
| phe.Fasting_rs55765964 | S8 | NEK1 | rs142718558S7  | "DIAPH1,LOC | 1.16E-11 | 0.000473748 | 1.82E-08    | 2.23E-08 | 0.908274 | 3.74E-05 |
| phe.Fasting_rs55765964 | S8 | NEK1 | rs142789100S8  | DIAPH1      | 2.06E-12 | 8.41E-05    | 3.89E-09    | 3.12E-09 | 0.127195 | 6.59E-06 |
| phe.Fasting_rs55765964 | S8 | NEK1 | rs142812798S7  | DIAPH1      | 2.06E-12 | 8.41E-05    | 3.89E-09    | 3.12E-09 | 0.127195 | 6.59E-06 |
| phe.Fasting_rs55765964 | S8 | NEK1 | rs143377827S13 | "DIAPH1,LOC | 1.81E-12 | 7.40E-05    | 3.45E-09    | 2.57E-09 | 0.104505 | 5.52E-06 |
| phe.Fasting_rs55765964 | S8 | NEK1 | rs143691978S11 | DIAPH1      | 2.06E-12 | 8.41E-05    | 3.89E-09    | 5.06E-09 | 0.206028 | 1.01E-05 |
| phe.Fasting_rs55765964 | S8 | NEK1 | rs144081334S11 | DIAPH1      | 2.06E-12 | 8.41E-05    | 3.89E-09    | 5.06E-09 | 0.206028 | 1.01E-05 |
| phe.Fasting_rs55765964 | S8 | NEK1 | rs144613910S8  | DIAPH1      | 1.16E-11 | 0.000473748 | 1.82E-08    | 2.23E-08 | 0.908274 | 3.74E-05 |
| phe.Fasting_rs55765964 | S8 | NEK1 | rs145027704S11 | DIAPH1      | 2.06E-12 | 8.41E-05    | 3.89E-09    | 5.06E-09 | 0.206028 | 1.01E-05 |
| phe.Fasting_rs55765964 | S8 | NEK1 | rs146220673S7  | DIAPH1      | 1.16E-11 | 0.000473748 | 1.82E-08    | 2.23E-08 | 0.908274 | 3.74E-05 |
| phe.Fasting_rs55765964 | S8 | NEK1 | rs146622060S13 | DIAPH1      | 2.06E-12 | 8.41E-05    | 3.89E-09    | 5.06E-09 | 0.206028 | 1.01E-05 |
| phe.Fasting_rs55765964 | S8 | NEK1 | rs146815317S5  | KPNA3       | 3.65E-16 | 1.49E-08    | 1.19E-12    | 2.15E-07 | 1        | 2.81E-04 |
| phe.Fasting_rs55765964 | S8 | NEK1 | rs146878162S7  | DIAPH1      | 1.16E-11 | 0.000473748 | 1.82E-08    | 2.23E-08 | 0.908274 | 3.74E-05 |
| phe.Fasting_rs55765964 | S8 | NEK1 | rs1470889 S5   | ZC3H3       | 4.38E-08 | 1           | 3.64E-05    | 6.78E-07 | 1        | 7.92E-04 |
| phe.Fasting_rs55765964 | S8 | NEK1 | rs1470890 S5   | ZC3H3       | 4.38E-08 | 1           | 3.64E-05    | 6.78E-07 | 1        | 7.92E-04 |
| phe.Fasting_rs55765964 | S8 | NEK1 | rs147314451S8  | DIAPH1      | 1.16E-11 | 0.000473748 | 1.82E-08    | 2.23E-08 | 0.908274 | 3.74E-05 |
| phe.Fasting_rs55765964 | S8 | NEK1 | rs147417996S7  | DIAPH1      | 2.06E-12 | 8.41E-05    | 3.89E-09    | 5.06E-09 | 0.206028 | 1.01E-05 |
| phe.Fasting_rs55765964 | S8 | NEK1 | rs147506725S21 | "PCDHGA1,Pl | 2.46E-05 | 1           | 0.00997154  | 2.34E-07 | 1        | 3.04E-04 |
| phe.Fasting_rs55765964 | S8 | NEK1 | rs147646948S7  | "LOC1005056 | 1.16E-11 | 0.000473748 | 1.82E-08    | 2.23E-08 | 0.908274 | 3.74E-05 |
| phe.Fasting_rs55765964 | S8 | NEK1 | rs147677041S8  | DIAPH1      | 2.06E-12 | 8.41E-05    | 3.89E-09    | 3.12E-09 | 0.127195 | 6.59E-06 |
| phe.Fasting_rs55765964 | S8 | NEK1 | rs148116628S7  | DIAPH1      | 1.16E-11 | 0.000473748 | 1.82E-08    | 2.23E-08 | 0.908274 | 3.74E-05 |
| phe.Fasting_rs55765964 | S8 | NEK1 | rs148423011S7  | DIAPH1      | 1.16E-11 | 0.000473748 | 1.82E-08    | 2.23E-08 | 0.908274 | 3.74E-05 |
| phe.Fasting_rs55765964 | S8 | NEK1 | rs149019627S8  | DIAPH1      | 2.06E-12 | 8.41E-05    | 3.89E-09    | 3.12E-09 | 0.127195 | 6.59E-06 |
| phe.Fasting_rs55765964 | S8 | NEK1 | rs149075406S8  | DIAPH1      | 1.16E-11 | 0.000473748 | 1.82E-08    | 2.23E-08 | 0.908274 | 3.74E-05 |
| phe.Fasting_rs55765964 | S8 | NEK1 | rs149334783S8  | DIAPH1      | 1.16E-11 | 0.000473748 | 1.82E-08    | 2.23E-08 | 0.908274 | 3.74E-05 |
| phe.Fasting_rs55765964 | S8 | NEK1 | rs149553852S21 | "PCDHGA10,l | 2.46E-05 | 1           | 9.97E-03    | 2.34E-07 | 1        | 3.04E-04 |
| phe.Fasting_rs55765964 | S8 | NEK1 | rs149716949S5  | DIAPH1      | 9.70E-13 | 3.96E-05    | 2.00E-09    | 2.72E-09 | 0.110842 | 5.82E-06 |
| phe.Fasting_rs55765964 | S8 | NEK1 | rs149791570S5  | DIAPH1      | 2.06E-12 | 8.41E-05    | 3.89E-09    | 3.12E-09 | 0.127195 | 6.59E-06 |
| phe.Fasting_rs55765964 | S8 | NEK1 | rs150117838S8  | KPNA3       | 3.65E-16 | 1.49E-08    | 1.19E-12    | 2.05E-07 | 1        | 2.70E-04 |
| phe.Fasting_rs55765964 | S8 | NEK1 | rs150452206S13 | "DIAPH1,LOC | 1.16E-11 | 0.000473748 | 1.82E-08    | 2.23E-08 | 0.908274 | 3.74E-05 |
| phe.Fasting_rs55765964 | S8 | NEK1 | rs150675915S7  | DIAPH1      | 1.16E-11 | 0.000473748 | 1.82E-08    | 2.23E-08 | 0.908274 | 3.74E-05 |
| phe.Fasting_rs55765964 | S8 | NEK1 | rs150765570S7  | DIAPH1      | 1.16E-11 | 0.000473748 | 1.82E-08    | 2.23E-08 | 0.908274 | 3.74E-05 |
| phe.Fasting_rs55765964 | S8 | NEK1 | rs150992994S11 | "PCDHGA5,Pl | 1.20E-11 | 0.000489159 | 1.87E-08    | 2.14E-08 | 0.869105 | 3.65E-05 |
| phe.Fasting_rs55765964 | S8 | NEK1 | rs151204700S8  | DIAPH1      | 1.16E-11 | 0.000473748 | 1.82E-08    | 2.23E-08 | 0.908274 | 3.74E-05 |
| phe.Fasting_rs55765964 | S8 | NEK1 | rs151330468S8  | DIAPH1      | 2.06E-12 | 8.41E-05    | 3.89E-09    | 5.06E-09 | 0.206028 | 1.01E-05 |
| phe.Fasting_rs55765964 | S8 | NEK1 | rs16894241 S4  | HIST1H2BK   | 6.81E-08 | 1           | 5.42E-05    | 5.37E-07 | 1        | 6.38E-04 |

|                        |    |      |             |     |             |          |             |          |          |           |          |
|------------------------|----|------|-------------|-----|-------------|----------|-------------|----------|----------|-----------|----------|
| phe.Fasting_rs55765964 | S8 | NEK1 | rs180772028 | S8  | "DIAPH1,LOC | 1.16E-11 | 0.000473748 | 1.82E-08 | 2.23E-08 | 0.908274  | 3.74E-05 |
| phe.Fasting_rs55765964 | S8 | NEK1 | rs181224861 | S7  | DIAPH1      | 1.16E-11 | 0.000473748 | 1.82E-08 | 2.23E-08 | 0.908274  | 3.74E-05 |
| phe.Fasting_rs55765964 | S8 | NEK1 | rs181247960 | S21 | "PCDHGA9,PI | 2.46E-05 | 1           | 9.97E-03 | 2.34E-07 | 1         | 3.04E-04 |
| phe.Fasting_rs55765964 | S8 | NEK1 | rs181824655 | S21 | "PCDHGB6,PI | 2.46E-05 | 1           | 9.97E-03 | 2.34E-07 | 1         | 3.04E-04 |
| phe.Fasting_rs55765964 | S8 | NEK1 | rs182714699 | S8  | DIAPH1      | 1.16E-11 | 0.000473748 | 1.82E-08 | 2.23E-08 | 0.908274  | 3.74E-05 |
| phe.Fasting_rs55765964 | S8 | NEK1 | rs182965141 | S8  | DIAPH1      | 2.54E-12 | 0.00010376  | 4.71E-09 | 1.71E-09 | 0.0696833 | 3.83E-06 |
| phe.Fasting_rs55765964 | S8 | NEK1 | rs183597049 | S7  | DIAPH1      | 1.16E-11 | 0.000473748 | 1.82E-08 | 2.23E-08 | 0.908274  | 3.74E-05 |
| phe.Fasting_rs55765964 | S8 | NEK1 | rs183980988 | S2  | NA          | 1.16E-11 | 0.000473748 | 1.82E-08 | 2.23E-08 | 0.908274  | 3.74E-05 |
| phe.Fasting_rs55765964 | S8 | NEK1 | rs184233232 | S7  | DIAPH1      | 1.16E-11 | 0.000473748 | 1.82E-08 | 2.23E-08 | 0.908274  | 3.74E-05 |
| phe.Fasting_rs55765964 | S8 | NEK1 | rs184509477 | S13 | "PCDHGB4,PI | 1.16E-11 | 0.000473748 | 1.82E-08 | 2.23E-08 | 0.908274  | 3.74E-05 |
| phe.Fasting_rs55765964 | S8 | NEK1 | rs185069296 | S15 | "LOC1005056 | 1.16E-11 | 0.000473748 | 1.82E-08 | 2.23E-08 | 0.908274  | 3.74E-05 |
| phe.Fasting_rs55765964 | S8 | NEK1 | rs185502834 | S8  | DIAPH1      | 2.06E-12 | 8.41E-05    | 3.89E-09 | 3.12E-09 | 0.127195  | 6.59E-06 |
| phe.Fasting_rs55765964 | S8 | NEK1 | rs185759881 | S7  | DIAPH1      | 1.16E-11 | 0.000473748 | 1.82E-08 | 2.23E-08 | 0.908274  | 3.74E-05 |
| phe.Fasting_rs55765964 | S8 | NEK1 | rs186288044 | S21 | "PCDHGB4,PI | 2.46E-05 | 1           | 9.97E-03 | 2.34E-07 | 1         | 3.04E-04 |
| phe.Fasting_rs55765964 | S8 | NEK1 | rs187000011 | S11 | DIAPH1      | 1.16E-11 | 0.000473748 | 1.82E-08 | 2.23E-08 | 0.908274  | 3.74E-05 |
| phe.Fasting_rs55765964 | S8 | NEK1 | rs188981295 | S5  | "RPS27AP10, | 1.16E-11 | 0.000473748 | 1.82E-08 | 2.23E-08 | 0.908274  | 3.74E-05 |
| phe.Fasting_rs55765964 | S8 | NEK1 | rs190559574 | S7  | DIAPH1      | 2.06E-12 | 8.41E-05    | 3.89E-09 | 3.12E-09 | 0.127195  | 6.59E-06 |
| phe.Fasting_rs55765964 | S8 | NEK1 | rs191544043 | S8  | DIAPH1      | 1.16E-11 | 0.000473748 | 1.82E-08 | 2.23E-08 | 0.908274  | 3.74E-05 |
| phe.Fasting_rs55765964 | S8 | NEK1 | rs191766712 | S7  | DIAPH1      | 1.16E-11 | 0.000473748 | 1.82E-08 | 2.23E-08 | 0.908274  | 3.74E-05 |
| phe.Fasting_rs55765964 | S8 | NEK1 | rs192690040 | S7  | DIAPH1      | 1.16E-11 | 0.000473748 | 1.82E-08 | 2.23E-08 | 0.908274  | 3.74E-05 |
| phe.Fasting_rs55765964 | S8 | NEK1 | rs192765219 | S7  | DIAPH1      | 1.16E-11 | 0.000473748 | 1.82E-08 | 2.23E-08 | 0.908274  | 3.74E-05 |
| phe.Fasting_rs55765964 | S8 | NEK1 | rs192770525 | S7  | DIAPH1      | 1.16E-11 | 0.000473748 | 1.82E-08 | 2.23E-08 | 0.908274  | 3.74E-05 |
| phe.Fasting_rs55765964 | S8 | NEK1 | rs2924507   | S5  | ZC3H3       | 4.38E-08 | 1           | 3.64E-05 | 6.78E-07 | 1         | 7.92E-04 |
| phe.Fasting_rs55765964 | S8 | NEK1 | rs2924508   | S8  | ZC3H3       | 4.38E-08 | 1           | 3.64E-05 | 9.52E-07 | 1         | 1.08E-03 |
| phe.Fasting_rs55765964 | S8 | NEK1 | rs2924511   | S7  | ZC3H3       | 4.38E-08 | 1           | 3.64E-05 | 5.76E-07 | 1         | 6.81E-04 |
| phe.Fasting_rs55765964 | S8 | NEK1 | rs2924512   | S7  | ZC3H3       | 4.02E-08 | 1           | 3.37E-05 | 7.17E-07 | 1         | 8.34E-04 |
| phe.Fasting_rs55765964 | S8 | NEK1 | rs2956376   | S8  | ZC3H3       | 4.38E-08 | 1           | 3.64E-05 | 3.89E-07 | 1         | 4.76E-04 |
| phe.Fasting_rs55765964 | S8 | NEK1 | rs2980270   | S7  | ZC3H3       | 4.38E-08 | 1           | 3.64E-05 | 3.89E-07 | 1         | 4.76E-04 |
| phe.Fasting_rs55765964 | S8 | NEK1 | rs2980272   | S7  | ZC3H3       | 4.02E-08 | 1           | 3.37E-05 | 7.52E-07 | 1         | 8.70E-04 |
| phe.Fasting_rs55765964 | S8 | NEK1 | rs2980275   | S5  | ZC3H3       | 4.38E-08 | 1           | 3.64E-05 | 6.78E-07 | 1         | 7.92E-04 |
| phe.Fasting_rs55765964 | S8 | NEK1 | rs35990401  | S7  | DIAPH1      | 1.06E-11 | 0.000433164 | 1.68E-08 | 8.38E-09 | 0.340996  | 1.59E-05 |
| phe.Fasting_rs55765964 | S8 | NEK1 | rs366767    | S5  | ZC3H3       | 7.71E-08 | 1           | 6.02E-05 | 4.19E-07 | 1         | 5.09E-04 |
| phe.Fasting_rs55765964 | S8 | NEK1 | rs55900860  | S7  | DIAPH1      | 2.06E-12 | 8.41E-05    | 3.89E-09 | 3.12E-09 | 0.127195  | 6.59E-06 |
| phe.Fasting_rs55765964 | S8 | NEK1 | rs6881310   | S23 | ISL1        | 4.39E-17 | 1.79E-09    | 2.29E-13 | 2.34E-12 | 9.53E-05  | 1.01E-08 |
| phe.Fasting_rs55765964 | S8 | NEK1 | rs73619637  | S8  | NA          | 1.10E-16 | 4.48E-09    | 4.61E-13 | 1.35E-08 | 0.549186  | 2.43E-05 |
| phe.Fasting_rs55765964 | S8 | NEK1 | rs77444916  | S23 | LOC642366   | 1.55E-17 | 6.32E-10    | 1.20E-13 | 8.75E-16 | 3.56E-08  | 1.16E-11 |
| phe.Fasting_rs55765964 | S8 | NEK1 | rs77798597  | S7  | KPNA3       | 3.65E-16 | 1.49E-08    | 1.19E-12 | 2.05E-07 | 1         | 2.70E-04 |
| phe.Fasting_rs55765964 | S8 | NEK1 | rs78703708  | S7  | FAF2        | 9.59E-18 | 3.92E-10    | 9.45E-14 | 2.08E-07 | 1         | 2.74E-04 |
| phe.Fasting_rs55765964 | S8 | NEK1 | rs78736524  | S5  | KPNA3       | 3.65E-16 | 1.49E-08    | 1.19E-12 | 2.15E-07 | 1         | 2.81E-04 |
| phe.Fasting_rs55765964 | S8 | NEK1 | rs79517926  | S15 | "DIAPH1,LOC | 3.35E-12 | 0.000136844 | 6.09E-09 | 2.29E-09 | 0.0931701 | 4.98E-06 |

|                        |    |        |             |     |           |          |             |          |          |             |          |
|------------------------|----|--------|-------------|-----|-----------|----------|-------------|----------|----------|-------------|----------|
| phe.Fasting_rs55765964 | S8 | NEK1   | rs79781495  | S8  | KPNA3     | 3.65E-16 | 1.49E-08    | 1.19E-12 | 2.05E-07 | 1           | 2.70E-04 |
| phe.Fasting_rs55765964 | S8 | NEK1   | rs80258830  | S24 | LOC642366 | 1.55E-17 | 6.32E-10    | 1.20E-13 | 8.75E-16 | 3.56E-08    | 1.16E-11 |
| phe.Fasting_rs55765964 | S8 | NEK1   | rs80332465  | S5  | KPNA3     | 3.93E-16 | 1.60E-08    | 1.27E-12 | 2.14E-07 | 1           | 2.81E-04 |
| phe.Fasting_rs55765964 | S8 | NEK1   | rs80334773  | S5  | KPNA3     | 3.93E-16 | 1.60E-08    | 1.27E-12 | 2.14E-07 | 1           | 2.81E-04 |
| phe.Fasting_rs55827967 | S8 | COPG2  | rs116079984 | S8  | KPNA3     | 5.40E-06 | 1           | 2.66E-03 | 9.76E-10 | 0.0397117   | 2.32E-06 |
| phe.Fasting_rs55827967 | S8 | COPG2  | rs74627895  | S8  | TMEM64    | 1.57E-10 | 0.00641302  | 1.97E-07 | 7.91E-06 | 1           | 6.71E-03 |
| phe.Fasting_rs55900860 | S7 | DIAPH1 | rs111576333 | S5  | TMEM64    | 5.56E-07 | 1           | 3.61E-04 | 7.80E-15 | 3.17E-07    | 6.90E-11 |
| phe.Fasting_rs55900860 | S7 | DIAPH1 | rs112089881 | S8  | ZFAND4    | 3.24E-18 | 1.32E-10    | 5.45E-14 | 1.95E-10 | 0.00795558  | 5.56E-07 |
| phe.Fasting_rs55900860 | S7 | DIAPH1 | rs112091318 | S5  | TMEM64    | 1.64E-07 | 1           | 1.18E-04 | 9.13E-09 | 0.371559    | 1.72E-05 |
| phe.Fasting_rs55900860 | S7 | DIAPH1 | rs114334325 | S7  | AP3M2     | 1.25E-15 | 5.12E-08    | 3.65E-12 | 8.81E-08 | 1           | 1.26E-04 |
| phe.Fasting_rs55900860 | S7 | DIAPH1 | rs114394395 | S7  | AP3M2     | 1.33E-15 | 5.44E-08    | 3.85E-12 | 8.81E-08 | 1           | 1.26E-04 |
| phe.Fasting_rs55900860 | S7 | DIAPH1 | rs114565620 | S8  | RCL1      | 2.03E-17 | 8.30E-10    | 1.43E-13 | 8.23E-09 | 0.335069    | 1.57E-05 |
| phe.Fasting_rs55900860 | S7 | DIAPH1 | rs115083290 | S19 | NA        | 8.17E-17 | 3.34E-09    | 3.58E-13 | 2.77E-09 | 0.11274     | 5.90E-06 |
| phe.Fasting_rs55900860 | S7 | DIAPH1 | rs115752779 | S19 | NA        | 8.17E-17 | 3.34E-09    | 3.58E-13 | 2.77E-09 | 0.11274     | 5.90E-06 |
| phe.Fasting_rs55900860 | S7 | DIAPH1 | rs115787552 | S5  | KPNA3     | 5.05E-16 | 2.06E-08    | 1.59E-12 | 2.34E-14 | 9.53E-07    | 1.79E-10 |
| phe.Fasting_rs55900860 | S7 | DIAPH1 | rs115888477 | S8  | NA        | 3.68E-15 | 1.50E-07    | 9.90E-12 | 4.11E-15 | 1.67E-07    | 3.84E-11 |
| phe.Fasting_rs55900860 | S7 | DIAPH1 | rs116011837 | S9  | BRD2      | 9.60E-12 | 0.000392176 | 1.53E-08 | 9.05E-15 | 3.68E-07    | 7.90E-11 |
| phe.Fasting_rs55900860 | S7 | DIAPH1 | rs116079984 | S8  | KPNA3     | 5.05E-16 | 2.06E-08    | 1.59E-12 | 2.56E-14 | 1.04E-06    | 1.94E-10 |
| phe.Fasting_rs55900860 | S7 | DIAPH1 | rs116120727 | S9  | BRD2      | 9.60E-12 | 0.000392176 | 1.53E-08 | 9.05E-15 | 3.68E-07    | 7.90E-11 |
| phe.Fasting_rs55900860 | S7 | DIAPH1 | rs116406581 | S2  | NA        | 5.24E-15 | 2.14E-07    | 1.36E-11 | 5.32E-08 | 1           | 8.11E-05 |
| phe.Fasting_rs55900860 | S7 | DIAPH1 | rs116548615 | S8  | TMEM45B   | 2.95E-17 | 1.21E-09    | 1.69E-13 | 1.76E-12 | 7.17E-05    | 7.72E-09 |
| phe.Fasting_rs55900860 | S7 | DIAPH1 | rs116696844 | S3  | AP3M2     | 1.90E-15 | 7.75E-08    | 5.41E-12 | 8.81E-08 | 1           | 1.26E-04 |
| phe.Fasting_rs55900860 | S7 | DIAPH1 | rs11989304  | S4  | TMEM64    | 5.56E-07 | 1           | 3.61E-04 | 1.11E-11 | 0.000453381 | 4.10E-08 |
| phe.Fasting_rs55900860 | S7 | DIAPH1 | rs140524622 | S7  | MRPL10    | 1.81E-17 | 7.37E-10    | 1.32E-13 | 2.83E-06 | 1           | 2.79E-03 |
| phe.Fasting_rs55900860 | S7 | DIAPH1 | rs146815317 | S5  | KPNA3     | 5.05E-16 | 2.06E-08    | 1.59E-12 | 2.34E-14 | 9.53E-07    | 1.79E-10 |
| phe.Fasting_rs55900860 | S7 | DIAPH1 | rs150117838 | S8  | KPNA3     | 5.05E-16 | 2.06E-08    | 1.59E-12 | 2.16E-14 | 8.80E-07    | 1.71E-10 |
| phe.Fasting_rs55900860 | S7 | DIAPH1 | rs150916187 | S4  | HIST1H2BK | 4.14E-06 | 1           | 2.11E-03 | 2.61E-15 | 1.06E-07    | 2.55E-11 |
| phe.Fasting_rs55900860 | S7 | DIAPH1 | rs16894241  | S4  | HIST1H2BK | 3.73E-12 | 0.000152384 | 6.73E-09 | 6.62E-15 | 2.69E-07    | 5.94E-11 |
| phe.Fasting_rs55900860 | S7 | DIAPH1 | rs34801978  | S3  | HOXB2     | 2.19E-06 | 1           | 1.21E-03 | 1.65E-09 | 0.0670533   | 3.72E-06 |
| phe.Fasting_rs55900860 | S7 | DIAPH1 | rs4732511   | S13 | POR       | 9.61E-15 | 3.93E-07    | 2.45E-11 | 2.36E-06 | 1           | 2.39E-03 |
| phe.Fasting_rs55900860 | S7 | DIAPH1 | rs57503635  | S3  | NA        | 1.28E-16 | 5.23E-09    | 5.19E-13 | 6.61E-15 | 2.69E-07    | 5.94E-11 |
| phe.Fasting_rs55900860 | S7 | DIAPH1 | rs60011869  | S16 | NA        | 2.13E-06 | 1           | 1.18E-03 | 1.78E-07 | 1           | 2.39E-04 |
| phe.Fasting_rs55900860 | S7 | DIAPH1 | rs6964407   | S7  | POR       | 3.32E-14 | 1.36E-06    | 8.04E-11 | 2.16E-06 | 1           | 2.22E-03 |
| phe.Fasting_rs55900860 | S7 | DIAPH1 | rs7004597   | S8  | NA        | 1.25E-15 | 5.12E-08    | 3.65E-12 | 5.12E-08 | 1           | 7.84E-05 |
| phe.Fasting_rs55900860 | S7 | DIAPH1 | rs7256517   | S7  | CYTH2     | 1.59E-16 | 6.48E-09    | 6.03E-13 | 9.69E-13 | 3.95E-05    | 4.59E-09 |
| phe.Fasting_rs55900860 | S7 | DIAPH1 | rs73283603  | S7  | ZWINT     | 4.49E-07 | 1           | 2.97E-04 | 4.53E-08 | 1           | 7.02E-05 |
| phe.Fasting_rs55900860 | S7 | DIAPH1 | rs73392640  | S8  | POLR3B    | 4.58E-11 | 0.00187102  | 6.24E-08 | 6.82E-12 | 0.000277641 | 2.62E-08 |
| phe.Fasting_rs55900860 | S7 | DIAPH1 | rs73619637  | S8  | NA        | 2.00E-16 | 8.15E-09    | 6.95E-13 | 6.35E-08 | 1           | 9.54E-05 |
| phe.Fasting_rs55900860 | S7 | DIAPH1 | rs74627895  | S8  | TMEM64    | 1.64E-07 | 1           | 1.18E-04 | 4.42E-09 | 0.179944    | 8.98E-06 |
| phe.Fasting_rs55900860 | S7 | DIAPH1 | rs74914207  | S24 | NA        | 2.89E-11 | 0.00117833  | 4.13E-08 | 1.56E-11 | 0.000634366 | 5.60E-08 |

|                        |     |        |             |     |             |          |             |          |          |             |          |
|------------------------|-----|--------|-------------|-----|-------------|----------|-------------|----------|----------|-------------|----------|
| phe.Fasting_rs55900860 | S7  | DIAPH1 | rs75350765  | S5  | RCL1        | 2.03E-17 | 8.30E-10    | 1.43E-13 | 8.23E-09 | 0.335069    | 1.57E-05 |
| phe.Fasting_rs55900860 | S7  | DIAPH1 | rs75374128  | S5  | CNTLN       | 5.25E-06 | 1           | 2.60E-03 | 1.83E-08 | 0.746586    | 3.18E-05 |
| phe.Fasting_rs55900860 | S7  | DIAPH1 | rs75506779  | S5  | TMCO3       | 1.04E-07 | 1           | 7.88E-05 | 2.32E-09 | 0.0942949   | 5.04E-06 |
| phe.Fasting_rs55900860 | S7  | DIAPH1 | rs75758702  | S24 | NA          | 1.04E-17 | 4.25E-10    | 9.89E-14 | 2.85E-11 | 0.00115844  | 9.77E-08 |
| phe.Fasting_rs55900860 | S7  | DIAPH1 | rs75864203  | S8  | CNTLN       | 5.25E-06 | 1           | 2.60E-03 | 1.83E-08 | 0.746586    | 3.18E-05 |
| phe.Fasting_rs55900860 | S7  | DIAPH1 | rs75949566  | S5  | TMEM64      | 6.52E-07 | 1           | 4.16E-04 | 1.49E-11 | 0.000607747 | 5.38E-08 |
| phe.Fasting_rs55900860 | S7  | DIAPH1 | rs76844308  | S8  | CNTLN       | 2.67E-06 | 1           | 1.44E-03 | 1.80E-08 | 0.73432     | 3.14E-05 |
| phe.Fasting_rs55900860 | S7  | DIAPH1 | rs7763107   | S8  | FARS2       | 9.44E-17 | 3.86E-09    | 4.06E-13 | 1.60E-12 | 6.52E-05    | 7.13E-09 |
| phe.Fasting_rs55900860 | S7  | DIAPH1 | rs77798597  | S7  | KPNA3       | 5.05E-16 | 2.06E-08    | 1.59E-12 | 2.16E-14 | 8.80E-07    | 1.71E-10 |
| phe.Fasting_rs55900860 | S7  | DIAPH1 | rs77845645  | S21 | NA          | 3.35E-07 | 1           | 2.29E-04 | 1.04E-11 | 0.000424266 | 3.85E-08 |
| phe.Fasting_rs55900860 | S7  | DIAPH1 | rs78353402  | S8  | AP3M2       | 1.25E-15 | 5.12E-08    | 3.65E-12 | 8.81E-08 | 1           | 1.26E-04 |
| phe.Fasting_rs55900860 | S7  | DIAPH1 | rs78516788  | S8  | SLC38A1     | 1.24E-06 | 1           | 7.38E-04 | 2.76E-09 | 0.112313    | 5.89E-06 |
| phe.Fasting_rs55900860 | S7  | DIAPH1 | rs78697063  | S5  | MSI2        | 7.77E-20 | 3.17E-12    | 2.23E-14 | 1.45E-10 | 0.00591847  | 4.35E-07 |
| phe.Fasting_rs55900860 | S7  | DIAPH1 | rs78703708  | S7  | FAF2        | 7.40E-12 | 0.000302252 | 1.27E-08 | 7.08E-06 | 1           | 6.12E-03 |
| phe.Fasting_rs55900860 | S7  | DIAPH1 | rs78722272  | S5  | CNTLN       | 5.25E-06 | 1           | 2.60E-03 | 1.89E-08 | 0.767323    | 3.26E-05 |
| phe.Fasting_rs55900860 | S7  | DIAPH1 | rs78736524  | S5  | KPNA3       | 5.05E-16 | 2.06E-08    | 1.59E-12 | 2.34E-14 | 9.53E-07    | 1.79E-10 |
| phe.Fasting_rs55900860 | S7  | DIAPH1 | rs78990344  | S2  | LOC10050631 | 5.56E-07 | 1           | 3.61E-04 | 1.11E-11 | 0.000453381 | 4.10E-08 |
| phe.Fasting_rs55900860 | S7  | DIAPH1 | rs79781495  | S8  | KPNA3       | 5.05E-16 | 2.06E-08    | 1.59E-12 | 2.16E-14 | 8.80E-07    | 1.71E-10 |
| phe.Fasting_rs55900860 | S7  | DIAPH1 | rs80200953  | S8  | PPP2R5D     | 1.41E-17 | 5.76E-10    | 1.14E-13 | 8.37E-10 | 0.034062    | 2.03E-06 |
| phe.Fasting_rs55900860 | S7  | DIAPH1 | rs80332465  | S5  | KPNA3       | 5.36E-16 | 2.19E-08    | 1.67E-12 | 2.32E-14 | 9.45E-07    | 1.79E-10 |
| phe.Fasting_rs55900860 | S7  | DIAPH1 | rs80334773  | S5  | KPNA3       | 5.36E-16 | 2.19E-08    | 1.67E-12 | 2.32E-14 | 9.45E-07    | 1.79E-10 |
| phe.Fasting_rs55900860 | S7  | DIAPH1 | rs891061    | S7  | POP4        | 6.59E-07 | 1           | 4.20E-04 | 1.19E-05 | 1           | 9.35E-03 |
| phe.Fasting_rs56043752 | S5  | LUZP1  | rs112348319 | S8  | SPTLC1      | 4.72E-06 | 1           | 2.37E-03 | 4.02E-07 | 1           | 4.90E-04 |
| phe.Fasting_rs56043752 | S5  | LUZP1  | rs112608164 | S8  | SPTLC1      | 4.72E-06 | 1           | 2.37E-03 | 4.02E-07 | 1           | 4.90E-04 |
| phe.Fasting_rs56043752 | S5  | LUZP1  | rs113568654 | S12 | SPTLC1      | 4.40E-06 | 1           | 2.23E-03 | 3.04E-06 | 1           | 2.96E-03 |
| phe.Fasting_rs56043752 | S5  | LUZP1  | rs76542405  | S5  | SPTLC1      | 4.72E-06 | 1           | 2.37E-03 | 4.02E-07 | 1           | 4.90E-04 |
| phe.Fasting_rs56043752 | S5  | LUZP1  | rs77523818  | S7  | SPTLC1      | 4.72E-06 | 1           | 2.37E-03 | 4.02E-07 | 1           | 4.90E-04 |
| phe.Fasting_rs56205406 | S8  | UBE2W  | rs139070959 | S8  | RPN2        | 1.18E-06 | 1           | 7.01E-04 | 2.36E-07 | 1           | 3.06E-04 |
| phe.Fasting_rs56205406 | S8  | UBE2W  | rs145412529 | S8  | "RBL1,RPS3A | 6.02E-07 | 1           | 3.88E-04 | 1.66E-06 | 1           | 1.76E-03 |
| phe.Fasting_rs56222534 | S24 | ALPL   | rs73392640  | S8  | POLR3B      | 4.22E-06 | 1           | 2.15E-03 | 2.79E-08 | 1           | 4.56E-05 |
| phe.Fasting_rs56228645 | S8  | COPG2  | rs116079984 | S8  | KPNA3       | 5.27E-06 | 1           | 2.61E-03 | 6.70E-10 | 0.0272805   | 1.68E-06 |
| phe.Fasting_rs56228645 | S8  | COPG2  | rs74627895  | S8  | TMEM64      | 1.77E-10 | 0.00722963  | 2.21E-07 | 8.70E-06 | 1           | 7.28E-03 |
| phe.Fasting_rs56398234 | S8  | LRCH1  | rs139070959 | S8  | RPN2        | 1.19E-05 | 1           | 5.30E-03 | 4.54E-07 | 1           | 5.47E-04 |
| phe.Fasting_rs56398234 | S8  | LRCH1  | rs145412529 | S8  | "RBL1,RPS3A | 6.77E-06 | 1           | 3.26E-03 | 4.54E-07 | 1           | 5.46E-04 |
| phe.Fasting_rs57165556 | S8  | NEK1   | rs112027720 | S7  | DIAPH1      | 9.17E-12 | 0.000374383 | 1.48E-08 | 2.23E-08 | 0.908274    | 3.74E-05 |
| phe.Fasting_rs57165556 | S8  | NEK1   | rs112089881 | S8  | ZFAND4      | 1.84E-18 | 7.51E-11    | 3.89E-14 | 5.67E-09 | 0.230592    | 1.11E-05 |
| phe.Fasting_rs57165556 | S8  | NEK1   | rs113219478 | S7  | DIAPH1      | 9.17E-12 | 0.000374383 | 1.48E-08 | 2.23E-08 | 0.908274    | 3.74E-05 |
| phe.Fasting_rs57165556 | S8  | NEK1   | rs113357907 | S24 | ISL1        | 6.12E-18 | 2.50E-10    | 7.50E-14 | 9.34E-16 | 3.80E-08    | 1.16E-11 |
| phe.Fasting_rs57165556 | S8  | NEK1   | rs115787552 | S5  | KPNA3       | 3.50E-16 | 1.43E-08    | 1.15E-12 | 2.15E-07 | 1           | 2.81E-04 |
| phe.Fasting_rs57165556 | S8  | NEK1   | rs115888477 | S8  | NA          | 2.70E-15 | 1.10E-07    | 7.57E-12 | 1.63E-08 | 0.66442     | 2.86E-05 |



|                        |    |      |             |     |             |          |             |          |          |            |          |
|------------------------|----|------|-------------|-----|-------------|----------|-------------|----------|----------|------------|----------|
| phe.Fasting_rs57165556 | S8 | NEK1 | rs116011837 | S9  | BRD2        | 2.29E-17 | 9.34E-10    | 1.45E-13 | 2.21E-10 | 0.00900315 | 6.20E-07 |
| phe.Fasting_rs57165556 | S8 | NEK1 | rs116079984 | S8  | KPNA3       | 3.50E-16 | 1.43E-08    | 1.15E-12 | 2.52E-07 | 1          | 3.25E-04 |
| phe.Fasting_rs57165556 | S8 | NEK1 | rs116120727 | S9  | BRD2        | 2.29E-17 | 9.34E-10    | 1.45E-13 | 2.21E-10 | 0.00900315 | 6.20E-07 |
| phe.Fasting_rs57165556 | S8 | NEK1 | rs116279995 | S20 | "PCDHGA4,Pi | 2.15E-05 | 1           | 8.87E-03 | 2.34E-07 | 1          | 3.04E-04 |
| phe.Fasting_rs57165556 | S8 | NEK1 | rs138090701 | S5  | HDAC3       | 1.02E-12 | 4.17E-05    | 2.10E-09 | 1.29E-08 | 0.523399   | 2.33E-05 |
| phe.Fasting_rs57165556 | S8 | NEK1 | rs138136869 | S7  | DIAPH1      | 1.65E-12 | 6.74E-05    | 3.16E-09 | 3.12E-09 | 0.127195   | 6.59E-06 |
| phe.Fasting_rs57165556 | S8 | NEK1 | rs138457103 | S10 | DIAPH1      | 5.43E-12 | 0.000221795 | 9.60E-09 | 2.09E-08 | 0.850097   | 3.57E-05 |
| phe.Fasting_rs57165556 | S8 | NEK1 | rs138487229 | S11 | DIAPH1      | 9.17E-12 | 0.000374383 | 1.48E-08 | 2.23E-08 | 0.908274   | 3.74E-05 |
| phe.Fasting_rs57165556 | S8 | NEK1 | rs138738950 | S8  | "PCDHGB2,Pi | 9.17E-12 | 0.000374383 | 1.48E-08 | 2.22E-08 | 0.904374   | 3.74E-05 |
| phe.Fasting_rs57165556 | S8 | NEK1 | rs139297927 | S8  | DIAPH1      | 9.17E-12 | 0.000374383 | 1.48E-08 | 2.23E-08 | 0.908274   | 3.74E-05 |
| phe.Fasting_rs57165556 | S8 | NEK1 | rs139337303 | S8  | DIAPH1      | 9.17E-12 | 0.000374383 | 1.48E-08 | 2.23E-08 | 0.908274   | 3.74E-05 |
| phe.Fasting_rs57165556 | S8 | NEK1 | rs139403963 | S8  | DIAPH1      | 1.65E-12 | 6.74E-05    | 3.16E-09 | 3.12E-09 | 0.127195   | 6.59E-06 |
| phe.Fasting_rs57165556 | S8 | NEK1 | rs139621309 | S18 | "LOC1005056 | 9.17E-12 | 0.000374383 | 1.48E-08 | 2.23E-08 | 0.908274   | 3.74E-05 |
| phe.Fasting_rs57165556 | S8 | NEK1 | rs139828110 | S8  | DIAPH1      | 1.65E-12 | 6.74E-05    | 3.16E-09 | 3.12E-09 | 0.127195   | 6.59E-06 |
| phe.Fasting_rs57165556 | S8 | NEK1 | rs140070363 | S8  | DIAPH1      | 9.17E-12 | 0.000374383 | 1.48E-08 | 2.23E-08 | 0.908274   | 3.74E-05 |
| phe.Fasting_rs57165556 | S8 | NEK1 | rs140644750 | S13 | DIAPH1      | 9.17E-12 | 0.000374383 | 1.48E-08 | 2.23E-08 | 0.908274   | 3.74E-05 |
| phe.Fasting_rs57165556 | S8 | NEK1 | rs141022544 | S8  | DIAPH1      | 9.17E-12 | 0.000374383 | 1.48E-08 | 2.23E-08 | 0.908274   | 3.74E-05 |
| phe.Fasting_rs57165556 | S8 | NEK1 | rs141525984 | S5  | DIAPH1      | 9.17E-12 | 0.000374383 | 1.48E-08 | 2.23E-08 | 0.908274   | 3.74E-05 |
| phe.Fasting_rs57165556 | S8 | NEK1 | rs141926074 | S8  | ATE1        | 1.33E-06 | 1           | 7.83E-04 | 1.98E-14 | 8.07E-07   | 1.59E-10 |
| phe.Fasting_rs57165556 | S8 | NEK1 | rs142480565 | S8  | DIAPH1      | 9.17E-12 | 0.000374383 | 1.48E-08 | 2.23E-08 | 0.908274   | 3.74E-05 |
| phe.Fasting_rs57165556 | S8 | NEK1 | rs142718558 | S7  | "DIAPH1,LOC | 9.17E-12 | 0.000374383 | 1.48E-08 | 2.23E-08 | 0.908274   | 3.74E-05 |
| phe.Fasting_rs57165556 | S8 | NEK1 | rs142789100 | S8  | DIAPH1      | 1.65E-12 | 6.74E-05    | 3.16E-09 | 3.12E-09 | 0.127195   | 6.59E-06 |
| phe.Fasting_rs57165556 | S8 | NEK1 | rs142812798 | S7  | DIAPH1      | 1.65E-12 | 6.74E-05    | 3.16E-09 | 3.12E-09 | 0.127195   | 6.59E-06 |
| phe.Fasting_rs57165556 | S8 | NEK1 | rs143377827 | S13 | "DIAPH1,LOC | 1.45E-12 | 5.90E-05    | 2.83E-09 | 2.57E-09 | 0.104505   | 5.52E-06 |
| phe.Fasting_rs57165556 | S8 | NEK1 | rs143691978 | S11 | DIAPH1      | 1.65E-12 | 6.74E-05    | 3.16E-09 | 5.06E-09 | 0.206028   | 1.01E-05 |
| phe.Fasting_rs57165556 | S8 | NEK1 | rs144081334 | S11 | DIAPH1      | 1.65E-12 | 6.74E-05    | 3.16E-09 | 5.06E-09 | 0.206028   | 1.01E-05 |
| phe.Fasting_rs57165556 | S8 | NEK1 | rs144613910 | S8  | DIAPH1      | 9.17E-12 | 0.000374383 | 1.48E-08 | 2.23E-08 | 0.908274   | 3.74E-05 |
| phe.Fasting_rs57165556 | S8 | NEK1 | rs145027704 | S11 | DIAPH1      | 1.65E-12 | 6.74E-05    | 3.16E-09 | 5.06E-09 | 0.206028   | 1.01E-05 |
| phe.Fasting_rs57165556 | S8 | NEK1 | rs146220673 | S7  | DIAPH1      | 9.17E-12 | 0.000374383 | 1.48E-08 | 2.23E-08 | 0.908274   | 3.74E-05 |
| phe.Fasting_rs57165556 | S8 | NEK1 | rs146622060 | S13 | DIAPH1      | 1.65E-12 | 6.74E-05    | 3.16E-09 | 5.06E-09 | 0.206028   | 1.01E-05 |
| phe.Fasting_rs57165556 | S8 | NEK1 | rs146815317 | S5  | KPNA3       | 3.50E-16 | 1.43E-08    | 1.15E-12 | 2.15E-07 | 1          | 2.81E-04 |
| phe.Fasting_rs57165556 | S8 | NEK1 | rs146878162 | S7  | DIAPH1      | 9.17E-12 | 0.000374383 | 1.48E-08 | 2.23E-08 | 0.908274   | 3.74E-05 |
| phe.Fasting_rs57165556 | S8 | NEK1 | rs1470889   | S5  | ZC3H3       | 3.60E-08 | 1           | 3.04E-05 | 6.78E-07 | 1          | 7.92E-04 |
| phe.Fasting_rs57165556 | S8 | NEK1 | rs1470890   | S5  | ZC3H3       | 3.60E-08 | 1           | 3.04E-05 | 6.78E-07 | 1          | 7.92E-04 |
| phe.Fasting_rs57165556 | S8 | NEK1 | rs147314451 | S8  | DIAPH1      | 9.17E-12 | 0.000374383 | 1.48E-08 | 2.23E-08 | 0.908274   | 3.74E-05 |
| phe.Fasting_rs57165556 | S8 | NEK1 | rs147417996 | S7  | DIAPH1      | 1.65E-12 | 6.74E-05    | 3.16E-09 | 5.06E-09 | 0.206028   | 1.01E-05 |
| phe.Fasting_rs57165556 | S8 | NEK1 | rs147506725 | S21 | "PCDHGA1,Pi | 2.15E-05 | 1           | 8.87E-03 | 2.34E-07 | 1          | 3.04E-04 |
| phe.Fasting_rs57165556 | S8 | NEK1 | rs147646948 | S7  | "LOC1005056 | 9.17E-12 | 0.000374383 | 1.48E-08 | 2.23E-08 | 0.908274   | 3.74E-05 |
| phe.Fasting_rs57165556 | S8 | NEK1 | rs147677041 | S8  | DIAPH1      | 1.65E-12 | 6.74E-05    | 3.16E-09 | 3.12E-09 | 0.127195   | 6.59E-06 |
| phe.Fasting_rs57165556 | S8 | NEK1 | rs148116628 | S7  | DIAPH1      | 9.17E-12 | 0.000374383 | 1.48E-08 | 2.23E-08 | 0.908274   | 3.74E-05 |

|                        |    |      |             |     |             |          |             |          |          |           |          |
|------------------------|----|------|-------------|-----|-------------|----------|-------------|----------|----------|-----------|----------|
| phe.Fasting_rs57165556 | S8 | NEK1 | rs148423011 | S7  | DIAPH1      | 9.17E-12 | 0.000374383 | 1.48E-08 | 2.23E-08 | 0.908274  | 3.74E-05 |
| phe.Fasting_rs57165556 | S8 | NEK1 | rs149019627 | S8  | DIAPH1      | 1.65E-12 | 6.74E-05    | 3.16E-09 | 3.12E-09 | 0.127195  | 6.59E-06 |
| phe.Fasting_rs57165556 | S8 | NEK1 | rs149075406 | S8  | DIAPH1      | 9.17E-12 | 0.000374383 | 1.48E-08 | 2.23E-08 | 0.908274  | 3.74E-05 |
| phe.Fasting_rs57165556 | S8 | NEK1 | rs149334783 | S8  | DIAPH1      | 9.17E-12 | 0.000374383 | 1.48E-08 | 2.23E-08 | 0.908274  | 3.74E-05 |
| phe.Fasting_rs57165556 | S8 | NEK1 | rs149553852 | S21 | "PCDHGA10,  | 2.15E-05 | 1           | 8.87E-03 | 2.34E-07 | 1         | 3.04E-04 |
| phe.Fasting_rs57165556 | S8 | NEK1 | rs149716949 | S5  | DIAPH1      | 7.67E-13 | 3.13E-05    | 1.59E-09 | 2.72E-09 | 0.110842  | 5.82E-06 |
| phe.Fasting_rs57165556 | S8 | NEK1 | rs149791570 | S5  | DIAPH1      | 1.65E-12 | 6.74E-05    | 3.16E-09 | 3.12E-09 | 0.127195  | 6.59E-06 |
| phe.Fasting_rs57165556 | S8 | NEK1 | rs150117838 | S8  | KPNA3       | 3.50E-16 | 1.43E-08    | 1.15E-12 | 2.05E-07 | 1         | 2.70E-04 |
| phe.Fasting_rs57165556 | S8 | NEK1 | rs150452206 | S13 | "DIAPH1,LOC | 9.17E-12 | 0.000374383 | 1.48E-08 | 2.23E-08 | 0.908274  | 3.74E-05 |
| phe.Fasting_rs57165556 | S8 | NEK1 | rs150675915 | S7  | DIAPH1      | 9.17E-12 | 0.000374383 | 1.48E-08 | 2.23E-08 | 0.908274  | 3.74E-05 |
| phe.Fasting_rs57165556 | S8 | NEK1 | rs150765570 | S7  | DIAPH1      | 9.17E-12 | 0.000374383 | 1.48E-08 | 2.23E-08 | 0.908274  | 3.74E-05 |
| phe.Fasting_rs57165556 | S8 | NEK1 | rs150992994 | S11 | "PCDHGA5,PI | 9.47E-12 | 0.000386737 | 1.52E-08 | 2.14E-08 | 0.869105  | 3.65E-05 |
| phe.Fasting_rs57165556 | S8 | NEK1 | rs151204700 | S8  | DIAPH1      | 9.17E-12 | 0.000374383 | 1.48E-08 | 2.23E-08 | 0.908274  | 3.74E-05 |
| phe.Fasting_rs57165556 | S8 | NEK1 | rs151330468 | S8  | DIAPH1      | 1.65E-12 | 6.74E-05    | 3.16E-09 | 5.06E-09 | 0.206028  | 1.01E-05 |
| phe.Fasting_rs57165556 | S8 | NEK1 | rs16894241  | S4  | HIST1H2BK   | 5.24E-08 | 1           | 4.28E-05 | 5.37E-07 | 1         | 6.38E-04 |
| phe.Fasting_rs57165556 | S8 | NEK1 | rs180772028 | S8  | "DIAPH1,LOC | 9.17E-12 | 0.000374383 | 1.48E-08 | 2.23E-08 | 0.908274  | 3.74E-05 |
| phe.Fasting_rs57165556 | S8 | NEK1 | rs181224861 | S7  | DIAPH1      | 9.17E-12 | 0.000374383 | 1.48E-08 | 2.23E-08 | 0.908274  | 3.74E-05 |
| phe.Fasting_rs57165556 | S8 | NEK1 | rs181247960 | S21 | "PCDHGA9,PI | 2.15E-05 | 1           | 8.87E-03 | 2.34E-07 | 1         | 3.04E-04 |
| phe.Fasting_rs57165556 | S8 | NEK1 | rs181824655 | S21 | "PCDHGB6,PI | 2.15E-05 | 1           | 8.87E-03 | 2.34E-07 | 1         | 3.04E-04 |
| phe.Fasting_rs57165556 | S8 | NEK1 | rs182714699 | S8  | DIAPH1      | 9.17E-12 | 0.000374383 | 1.48E-08 | 2.23E-08 | 0.908274  | 3.74E-05 |
| phe.Fasting_rs57165556 | S8 | NEK1 | rs182965141 | S8  | DIAPH1      | 2.01E-12 | 8.19E-05    | 3.80E-09 | 1.71E-09 | 0.0696833 | 3.83E-06 |
| phe.Fasting_rs57165556 | S8 | NEK1 | rs183597049 | S7  | DIAPH1      | 9.17E-12 | 0.000374383 | 1.48E-08 | 2.23E-08 | 0.908274  | 3.74E-05 |
| phe.Fasting_rs57165556 | S8 | NEK1 | rs183980988 | S2  | NA          | 9.17E-12 | 0.000374383 | 1.48E-08 | 2.23E-08 | 0.908274  | 3.74E-05 |
| phe.Fasting_rs57165556 | S8 | NEK1 | rs184233232 | S7  | DIAPH1      | 9.17E-12 | 0.000374383 | 1.48E-08 | 2.23E-08 | 0.908274  | 3.74E-05 |
| phe.Fasting_rs57165556 | S8 | NEK1 | rs184509477 | S13 | "PCDHGB4,PI | 9.17E-12 | 0.000374383 | 1.48E-08 | 2.23E-08 | 0.908274  | 3.74E-05 |
| phe.Fasting_rs57165556 | S8 | NEK1 | rs185069296 | S15 | "LOC1005056 | 9.17E-12 | 0.000374383 | 1.48E-08 | 2.23E-08 | 0.908274  | 3.74E-05 |
| phe.Fasting_rs57165556 | S8 | NEK1 | rs185502834 | S8  | DIAPH1      | 1.65E-12 | 6.74E-05    | 3.16E-09 | 3.12E-09 | 0.127195  | 6.59E-06 |
| phe.Fasting_rs57165556 | S8 | NEK1 | rs185759881 | S7  | DIAPH1      | 9.17E-12 | 0.000374383 | 1.48E-08 | 2.23E-08 | 0.908274  | 3.74E-05 |
| phe.Fasting_rs57165556 | S8 | NEK1 | rs186288044 | S21 | "PCDHGB4,PI | 2.15E-05 | 1           | 8.87E-03 | 2.34E-07 | 1         | 3.04E-04 |
| phe.Fasting_rs57165556 | S8 | NEK1 | rs187000011 | S11 | DIAPH1      | 9.17E-12 | 0.000374383 | 1.48E-08 | 2.23E-08 | 0.908274  | 3.74E-05 |
| phe.Fasting_rs57165556 | S8 | NEK1 | rs188981295 | S5  | "RPS27AP10, | 9.17E-12 | 0.000374383 | 1.48E-08 | 2.23E-08 | 0.908274  | 3.74E-05 |
| phe.Fasting_rs57165556 | S8 | NEK1 | rs190559574 | S7  | DIAPH1      | 1.65E-12 | 6.74E-05    | 3.16E-09 | 3.12E-09 | 0.127195  | 6.59E-06 |
| phe.Fasting_rs57165556 | S8 | NEK1 | rs191544043 | S8  | DIAPH1      | 9.17E-12 | 0.000374383 | 1.48E-08 | 2.23E-08 | 0.908274  | 3.74E-05 |
| phe.Fasting_rs57165556 | S8 | NEK1 | rs191766712 | S7  | DIAPH1      | 9.17E-12 | 0.000374383 | 1.48E-08 | 2.23E-08 | 0.908274  | 3.74E-05 |
| phe.Fasting_rs57165556 | S8 | NEK1 | rs192690040 | S7  | DIAPH1      | 9.17E-12 | 0.000374383 | 1.48E-08 | 2.23E-08 | 0.908274  | 3.74E-05 |
| phe.Fasting_rs57165556 | S8 | NEK1 | rs192765219 | S7  | DIAPH1      | 9.17E-12 | 0.000374383 | 1.48E-08 | 2.23E-08 | 0.908274  | 3.74E-05 |
| phe.Fasting_rs57165556 | S8 | NEK1 | rs192770525 | S7  | DIAPH1      | 9.17E-12 | 0.000374383 | 1.48E-08 | 2.23E-08 | 0.908274  | 3.74E-05 |
| phe.Fasting_rs57165556 | S8 | NEK1 | rs2924507   | S5  | ZC3H3       | 3.60E-08 | 1           | 3.04E-05 | 6.78E-07 | 1         | 7.92E-04 |
| phe.Fasting_rs57165556 | S8 | NEK1 | rs2924508   | S8  | ZC3H3       | 3.60E-08 | 1           | 3.04E-05 | 9.52E-07 | 1         | 1.08E-03 |
| phe.Fasting_rs57165556 | S8 | NEK1 | rs2924511   | S7  | ZC3H3       | 3.60E-08 | 1           | 3.04E-05 | 5.76E-07 | 1         | 6.81E-04 |

|                        |    |       |             |     |             |          |             |          |          |           |          |
|------------------------|----|-------|-------------|-----|-------------|----------|-------------|----------|----------|-----------|----------|
| phe.Fasting_rs57165556 | S8 | NEK1  | rs2924512   | S7  | ZC3H3       | 4.02E-08 | 1           | 3.37E-05 | 7.17E-07 | 1         | 8.34E-04 |
| phe.Fasting_rs57165556 | S8 | NEK1  | rs2956376   | S8  | ZC3H3       | 3.60E-08 | 1           | 3.04E-05 | 3.89E-07 | 1         | 4.76E-04 |
| phe.Fasting_rs57165556 | S8 | NEK1  | rs2980270   | S7  | ZC3H3       | 3.60E-08 | 1           | 3.04E-05 | 3.89E-07 | 1         | 4.76E-04 |
| phe.Fasting_rs57165556 | S8 | NEK1  | rs2980272   | S7  | ZC3H3       | 4.02E-08 | 1           | 3.37E-05 | 7.52E-07 | 1         | 8.70E-04 |
| phe.Fasting_rs57165556 | S8 | NEK1  | rs2980275   | S5  | ZC3H3       | 3.60E-08 | 1           | 3.04E-05 | 6.78E-07 | 1         | 7.92E-04 |
| phe.Fasting_rs57165556 | S8 | NEK1  | rs35990401  | S7  | DIAPH1      | 8.40E-12 | 0.000343123 | 1.39E-08 | 8.38E-09 | 0.340996  | 1.59E-05 |
| phe.Fasting_rs57165556 | S8 | NEK1  | rs366767    | S5  | ZC3H3       | 6.34E-08 | 1           | 5.08E-05 | 4.19E-07 | 1         | 5.09E-04 |
| phe.Fasting_rs57165556 | S8 | NEK1  | rs55900860  | S7  | DIAPH1      | 1.65E-12 | 6.74E-05    | 3.16E-09 | 3.12E-09 | 0.127195  | 6.59E-06 |
| phe.Fasting_rs57165556 | S8 | NEK1  | rs6881310   | S23 | ISL1        | 4.23E-17 | 1.73E-09    | 2.22E-13 | 2.34E-12 | 9.53E-05  | 1.01E-08 |
| phe.Fasting_rs57165556 | S8 | NEK1  | rs73619637  | S8  | NA          | 1.02E-16 | 4.15E-09    | 4.31E-13 | 1.35E-08 | 0.549186  | 2.43E-05 |
| phe.Fasting_rs57165556 | S8 | NEK1  | rs77444916  | S23 | LOC642366   | 1.50E-17 | 6.11E-10    | 1.18E-13 | 8.75E-16 | 3.56E-08  | 1.16E-11 |
| phe.Fasting_rs57165556 | S8 | NEK1  | rs77798597  | S7  | KPNA3       | 3.50E-16 | 1.43E-08    | 1.15E-12 | 2.05E-07 | 1         | 2.70E-04 |
| phe.Fasting_rs57165556 | S8 | NEK1  | rs78703708  | S7  | FAF2        | 9.25E-18 | 3.78E-10    | 9.24E-14 | 2.08E-07 | 1         | 2.74E-04 |
| phe.Fasting_rs57165556 | S8 | NEK1  | rs78736524  | S5  | KPNA3       | 3.50E-16 | 1.43E-08    | 1.15E-12 | 2.15E-07 | 1         | 2.81E-04 |
| phe.Fasting_rs57165556 | S8 | NEK1  | rs79517926  | S15 | "DIAPH1,LOC | 2.69E-12 | 0.000109672 | 4.97E-09 | 2.29E-09 | 0.0931701 | 4.98E-06 |
| phe.Fasting_rs57165556 | S8 | NEK1  | rs79781495  | S8  | KPNA3       | 3.50E-16 | 1.43E-08    | 1.15E-12 | 2.05E-07 | 1         | 2.70E-04 |
| phe.Fasting_rs57165556 | S8 | NEK1  | rs80258830  | S24 | LOC642366   | 1.50E-17 | 6.11E-10    | 1.18E-13 | 8.75E-16 | 3.56E-08  | 1.16E-11 |
| phe.Fasting_rs57165556 | S8 | NEK1  | rs80332465  | S5  | KPNA3       | 3.75E-16 | 1.53E-08    | 1.22E-12 | 2.14E-07 | 1         | 2.81E-04 |
| phe.Fasting_rs57165556 | S8 | NEK1  | rs80334773  | S5  | KPNA3       | 3.75E-16 | 1.53E-08    | 1.22E-12 | 2.14E-07 | 1         | 2.81E-04 |
| phe.Fasting_rs57287019 | S5 | CLCN3 | rs112027720 | S7  | DIAPH1      | 5.04E-14 | 2.06E-06    | 1.18E-10 | 7.69E-08 | 1         | 1.12E-04 |
| phe.Fasting_rs57287019 | S5 | CLCN3 | rs113219478 | S7  | DIAPH1      | 5.04E-14 | 2.06E-06    | 1.18E-10 | 7.69E-08 | 1         | 1.12E-04 |
| phe.Fasting_rs57287019 | S5 | CLCN3 | rs113357907 | S24 | ISL1        | 5.36E-17 | 2.19E-09    | 2.62E-13 | 4.72E-13 | 1.92E-05  | 2.49E-09 |
| phe.Fasting_rs57287019 | S5 | CLCN3 | rs116011837 | S9  | BRD2        | 1.83E-10 | 0.00745731  | 2.27E-07 | 2.88E-07 | 1         | 3.65E-04 |
| phe.Fasting_rs57287019 | S5 | CLCN3 | rs116120727 | S9  | BRD2        | 1.83E-10 | 0.00745731  | 2.27E-07 | 2.88E-07 | 1         | 3.65E-04 |
| phe.Fasting_rs57287019 | S5 | CLCN3 | rs116279995 | S20 | "PCDHGA4,PI | 1.37E-09 | 0.0559114   | 1.47E-06 | 1.61E-06 | 1         | 1.71E-03 |
| phe.Fasting_rs57287019 | S5 | CLCN3 | rs138136869 | S7  | DIAPH1      | 1.29E-14 | 5.25E-07    | 3.26E-11 | 1.13E-08 | 0.46094   | 2.07E-05 |
| phe.Fasting_rs57287019 | S5 | CLCN3 | rs138457103 | S10 | DIAPH1      | 3.76E-14 | 1.54E-06    | 9.07E-11 | 7.29E-08 | 1         | 1.07E-04 |
| phe.Fasting_rs57287019 | S5 | CLCN3 | rs138487229 | S11 | DIAPH1      | 5.04E-14 | 2.06E-06    | 1.18E-10 | 7.69E-08 | 1         | 1.12E-04 |
| phe.Fasting_rs57287019 | S5 | CLCN3 | rs138738950 | S8  | "PCDHGB2,PI | 5.04E-14 | 2.06E-06    | 1.18E-10 | 8.40E-08 | 1         | 1.21E-04 |
| phe.Fasting_rs57287019 | S5 | CLCN3 | rs139297927 | S8  | DIAPH1      | 5.04E-14 | 2.06E-06    | 1.18E-10 | 7.69E-08 | 1         | 1.12E-04 |
| phe.Fasting_rs57287019 | S5 | CLCN3 | rs139337303 | S8  | DIAPH1      | 5.04E-14 | 2.06E-06    | 1.18E-10 | 7.69E-08 | 1         | 1.12E-04 |
| phe.Fasting_rs57287019 | S5 | CLCN3 | rs139403963 | S8  | DIAPH1      | 1.29E-14 | 5.25E-07    | 3.26E-11 | 1.13E-08 | 0.46094   | 2.07E-05 |
| phe.Fasting_rs57287019 | S5 | CLCN3 | rs139621309 | S18 | "LOC1005050 | 5.04E-14 | 2.06E-06    | 1.18E-10 | 7.69E-08 | 1         | 1.12E-04 |
| phe.Fasting_rs57287019 | S5 | CLCN3 | rs139828110 | S8  | DIAPH1      | 1.29E-14 | 5.25E-07    | 3.26E-11 | 1.13E-08 | 0.46094   | 2.07E-05 |
| phe.Fasting_rs57287019 | S5 | CLCN3 | rs140070363 | S8  | DIAPH1      | 5.04E-14 | 2.06E-06    | 1.18E-10 | 7.69E-08 | 1         | 1.12E-04 |
| phe.Fasting_rs57287019 | S5 | CLCN3 | rs140644750 | S13 | DIAPH1      | 5.04E-14 | 2.06E-06    | 1.18E-10 | 7.69E-08 | 1         | 1.12E-04 |
| phe.Fasting_rs57287019 | S5 | CLCN3 | rs141022544 | S8  | DIAPH1      | 5.04E-14 | 2.06E-06    | 1.18E-10 | 7.69E-08 | 1         | 1.12E-04 |
| phe.Fasting_rs57287019 | S5 | CLCN3 | rs141525984 | S5  | DIAPH1      | 5.04E-14 | 2.06E-06    | 1.18E-10 | 7.69E-08 | 1         | 1.12E-04 |
| phe.Fasting_rs57287019 | S5 | CLCN3 | rs141692339 | S3  | "PCDHGA6,PI | 1.30E-09 | 0.0532825   | 1.41E-06 | 2.30E-06 | 1         | 2.34E-03 |
| phe.Fasting_rs57287019 | S5 | CLCN3 | rs141926074 | S8  | ATE1        | 4.15E-11 | 0.00169555  | 5.70E-08 | 2.68E-10 | 0.0109291 | 7.36E-07 |

|                        |    |       |             |     |              |          |             |           |          |          |          |
|------------------------|----|-------|-------------|-----|--------------|----------|-------------|-----------|----------|----------|----------|
| phe.Fasting_rs57287019 | S5 | CLCN3 | rs142480565 | S8  | DIAPH1       | 5.04E-14 | 2.06E-06    | 1.18E-10  | 7.69E-08 | 1        | 1.12E-04 |
| phe.Fasting_rs57287019 | S5 | CLCN3 | rs142718558 | S7  | "DIAPH1,LOC  | 5.04E-14 | 2.06E-06    | 1.18E-10  | 7.69E-08 | 1        | 1.12E-04 |
| phe.Fasting_rs57287019 | S5 | CLCN3 | rs142789100 | S8  | DIAPH1       | 1.29E-14 | 5.25E-07    | 3.26E-11  | 1.13E-08 | 0.46094  | 2.07E-05 |
| phe.Fasting_rs57287019 | S5 | CLCN3 | rs142812798 | S7  | DIAPH1       | 1.29E-14 | 5.25E-07    | 3.26E-11  | 1.13E-08 | 0.46094  | 2.07E-05 |
| phe.Fasting_rs57287019 | S5 | CLCN3 | rs143377827 | S13 | "DIAPH1,LOC  | 8.70E-15 | 3.55E-07    | 2.23E-11  | 9.21E-09 | 0.374703 | 1.73E-05 |
| phe.Fasting_rs57287019 | S5 | CLCN3 | rs143691978 | S11 | DIAPH1       | 1.29E-14 | 5.25E-07    | 3.26E-11  | 1.56E-08 | 0.634455 | 2.76E-05 |
| phe.Fasting_rs57287019 | S5 | CLCN3 | rs144081334 | S11 | DIAPH1       | 1.29E-14 | 5.25E-07    | 3.26E-11  | 1.56E-08 | 0.634455 | 2.76E-05 |
| phe.Fasting_rs57287019 | S5 | CLCN3 | rs144613910 | S8  | DIAPH1       | 5.04E-14 | 2.06E-06    | 1.18E-10  | 7.69E-08 | 1        | 1.12E-04 |
| phe.Fasting_rs57287019 | S5 | CLCN3 | rs145027704 | S11 | DIAPH1       | 1.29E-14 | 5.25E-07    | 3.26E-11  | 1.56E-08 | 0.634455 | 2.76E-05 |
| phe.Fasting_rs57287019 | S5 | CLCN3 | rs146220673 | S7  | DIAPH1       | 5.04E-14 | 2.06E-06    | 1.18E-10  | 7.69E-08 | 1        | 1.12E-04 |
| phe.Fasting_rs57287019 | S5 | CLCN3 | rs146622060 | S13 | DIAPH1       | 1.29E-14 | 5.25E-07    | 3.26E-11  | 1.56E-08 | 0.634455 | 2.76E-05 |
| phe.Fasting_rs57287019 | S5 | CLCN3 | rs146878162 | S7  | DIAPH1       | 5.04E-14 | 2.06E-06    | 1.18E-10  | 7.69E-08 | 1        | 1.12E-04 |
| phe.Fasting_rs57287019 | S5 | CLCN3 | rs147314451 | S8  | DIAPH1       | 5.04E-14 | 2.06E-06    | 1.18E-10  | 7.69E-08 | 1        | 1.12E-04 |
| phe.Fasting_rs57287019 | S5 | CLCN3 | rs147417996 | S7  | DIAPH1       | 1.29E-14 | 5.25E-07    | 3.26E-11  | 1.56E-08 | 0.634455 | 2.76E-05 |
| phe.Fasting_rs57287019 | S5 | CLCN3 | rs147506725 | S21 | "PCDHGA1,PI  | 1.37E-09 | 0.0559114   | "1.47E-06 | 1.61E-06 | 1        | 1.71E-03 |
| phe.Fasting_rs57287019 | S5 | CLCN3 | rs147646948 | S7  | "LOC1005050  | 5.04E-14 | 2.06E-06    | 1.18E-10  | 7.69E-08 | 1        | 1.12E-04 |
| phe.Fasting_rs57287019 | S5 | CLCN3 | rs147677041 | S8  | DIAPH1       | 1.29E-14 | 5.25E-07    | 3.26E-11  | 1.13E-08 | 0.46094  | 2.07E-05 |
| phe.Fasting_rs57287019 | S5 | CLCN3 | rs148116628 | S7  | DIAPH1       | 5.04E-14 | 2.06E-06    | 1.18E-10  | 7.69E-08 | 1        | 1.12E-04 |
| phe.Fasting_rs57287019 | S5 | CLCN3 | rs148423011 | S7  | DIAPH1       | 5.04E-14 | 2.06E-06    | 1.18E-10  | 7.69E-08 | 1        | 1.12E-04 |
| phe.Fasting_rs57287019 | S5 | CLCN3 | rs149019627 | S8  | DIAPH1       | 1.29E-14 | 5.25E-07    | 3.26E-11  | 1.13E-08 | 0.46094  | 2.07E-05 |
| phe.Fasting_rs57287019 | S5 | CLCN3 | rs149075406 | S8  | DIAPH1       | 5.04E-14 | 2.06E-06    | 1.18E-10  | 7.69E-08 | 1        | 1.12E-04 |
| phe.Fasting_rs57287019 | S5 | CLCN3 | rs149334783 | S8  | DIAPH1       | 5.04E-14 | 2.06E-06    | 1.18E-10  | 7.69E-08 | 1        | 1.12E-04 |
| phe.Fasting_rs57287019 | S5 | CLCN3 | rs149553852 | S21 | "PCDHGA10,PI | 1.37E-09 | 0.0559114   | "1.47E-06 | 1.61E-06 | 1        | 1.71E-03 |
| phe.Fasting_rs57287019 | S5 | CLCN3 | rs149716949 | S5  | DIAPH1       | 3.53E-15 | 1.44E-07    | 9.50E-12  | 8.92E-09 | 0.363251 | 1.68E-05 |
| phe.Fasting_rs57287019 | S5 | CLCN3 | rs149791570 | S5  | DIAPH1       | 1.29E-14 | 5.25E-07    | 3.26E-11  | 1.13E-08 | 0.46094  | 2.07E-05 |
| phe.Fasting_rs57287019 | S5 | CLCN3 | rs150452206 | S13 | "DIAPH1,LOC  | 5.04E-14 | 2.06E-06    | 1.18E-10  | 7.69E-08 | 1        | 1.12E-04 |
| phe.Fasting_rs57287019 | S5 | CLCN3 | rs150675915 | S7  | DIAPH1       | 5.04E-14 | 2.06E-06    | 1.18E-10  | 7.69E-08 | 1        | 1.12E-04 |
| phe.Fasting_rs57287019 | S5 | CLCN3 | rs150765570 | S7  | DIAPH1       | 5.04E-14 | 2.06E-06    | 1.18E-10  | 7.69E-08 | 1        | 1.12E-04 |
| phe.Fasting_rs57287019 | S5 | CLCN3 | rs150916187 | S4  | HIST1H2BK    | 5.60E-09 | 0.228828    | 5.45E-06  | 8.30E-08 | 1        | 1.20E-04 |
| phe.Fasting_rs57287019 | S5 | CLCN3 | rs150992994 | S11 | "PCDHGA5,PI  | 5.04E-14 | 2.06E-06    | 1.18E-10  | 7.52E-08 | 1        | 1.10E-04 |
| phe.Fasting_rs57287019 | S5 | CLCN3 | rs151204700 | S8  | DIAPH1       | 5.04E-14 | 2.06E-06    | 1.18E-10  | 7.69E-08 | 1        | 1.12E-04 |
| phe.Fasting_rs57287019 | S5 | CLCN3 | rs151330468 | S8  | DIAPH1       | 1.29E-14 | 5.25E-07    | 3.26E-11  | 1.56E-08 | 0.634455 | 2.76E-05 |
| phe.Fasting_rs57287019 | S5 | CLCN3 | rs16894241  | S4  | HIST1H2BK    | 2.10E-11 | 0.000856644 | 3.10E-08  | 1.58E-07 | 1        | 2.14E-04 |
| phe.Fasting_rs57287019 | S5 | CLCN3 | rs180772028 | S8  | "DIAPH1,LOC  | 5.04E-14 | 2.06E-06    | 1.18E-10  | 7.69E-08 | 1        | 1.12E-04 |
| phe.Fasting_rs57287019 | S5 | CLCN3 | rs181224861 | S7  | DIAPH1       | 5.04E-14 | 2.06E-06    | 1.18E-10  | 7.69E-08 | 1        | 1.12E-04 |
| phe.Fasting_rs57287019 | S5 | CLCN3 | rs181247960 | S21 | "PCDHGA9,PI  | 1.37E-09 | 0.0559114   | "1.47E-06 | 1.61E-06 | 1        | 1.71E-03 |
| phe.Fasting_rs57287019 | S5 | CLCN3 | rs181824655 | S21 | "PCDHGB6,PI  | 1.37E-09 | 0.0559114   | "1.47E-06 | 1.61E-06 | 1        | 1.71E-03 |
| phe.Fasting_rs57287019 | S5 | CLCN3 | rs182714699 | S8  | DIAPH1       | 5.04E-14 | 2.06E-06    | 1.18E-10  | 7.69E-08 | 1        | 1.12E-04 |
| phe.Fasting_rs57287019 | S5 | CLCN3 | rs182965141 | S8  | DIAPH1       | 1.58E-14 | 6.47E-07    | 3.98E-11  | 4.01E-09 | 0.16305  | 8.22E-06 |
| phe.Fasting_rs57287019 | S5 | CLCN3 | rs183597049 | S7  | DIAPH1       | 5.04E-14 | 2.06E-06    | 1.18E-10  | 7.69E-08 | 1        | 1.12E-04 |

|                        |    |       |             |     |             |          |             |          |          |            |          |
|------------------------|----|-------|-------------|-----|-------------|----------|-------------|----------|----------|------------|----------|
| phe.Fasting_rs57287019 | S5 | CLCN3 | rs183980988 | S2  | NA          | 5.04E-14 | 2.06E-06    | 1.18E-10 | 7.69E-08 | 1          | 1.12E-04 |
| phe.Fasting_rs57287019 | S5 | CLCN3 | rs184233232 | S7  | DIAPH1      | 5.04E-14 | 2.06E-06    | 1.18E-10 | 7.69E-08 | 1          | 1.12E-04 |
| phe.Fasting_rs57287019 | S5 | CLCN3 | rs184509477 | S13 | "PCDHGB4,PI | 5.04E-14 | 2.06E-06    | 1.18E-10 | 7.69E-08 | 1          | 1.12E-04 |
| phe.Fasting_rs57287019 | S5 | CLCN3 | rs185069296 | S15 | "LOC100505t | 5.04E-14 | 2.06E-06    | 1.18E-10 | 7.69E-08 | 1          | 1.12E-04 |
| phe.Fasting_rs57287019 | S5 | CLCN3 | rs185502834 | S8  | DIAPH1      | 1.29E-14 | 5.25E-07    | 3.26E-11 | 1.13E-08 | 0.46094    | 2.07E-05 |
| phe.Fasting_rs57287019 | S5 | CLCN3 | rs185759881 | S7  | DIAPH1      | 5.04E-14 | 2.06E-06    | 1.18E-10 | 7.69E-08 | 1          | 1.12E-04 |
| phe.Fasting_rs57287019 | S5 | CLCN3 | rs186288044 | S21 | "PCDHGB4,PI | 1.37E-09 | 5.59E-02    | 1.47E-06 | 1.61E-06 | 1          | 1.71E-03 |
| phe.Fasting_rs57287019 | S5 | CLCN3 | rs187000011 | S11 | DIAPH1      | 5.04E-14 | 2.06E-06    | 1.18E-10 | 7.69E-08 | 1          | 1.12E-04 |
| phe.Fasting_rs57287019 | S5 | CLCN3 | rs188981295 | S5  | "RPS27AP10, | 5.04E-14 | 2.06E-06    | 1.18E-10 | 7.69E-08 | 1          | 1.12E-04 |
| phe.Fasting_rs57287019 | S5 | CLCN3 | rs190559574 | S7  | DIAPH1      | 1.29E-14 | 5.25E-07    | 3.26E-11 | 1.13E-08 | 0.46094    | 2.07E-05 |
| phe.Fasting_rs57287019 | S5 | CLCN3 | rs191544043 | S8  | DIAPH1      | 5.04E-14 | 2.06E-06    | 1.18E-10 | 7.69E-08 | 1          | 1.12E-04 |
| phe.Fasting_rs57287019 | S5 | CLCN3 | rs191766712 | S7  | DIAPH1      | 5.04E-14 | 2.06E-06    | 1.18E-10 | 7.69E-08 | 1          | 1.12E-04 |
| phe.Fasting_rs57287019 | S5 | CLCN3 | rs192690040 | S7  | DIAPH1      | 5.04E-14 | 2.06E-06    | 1.18E-10 | 7.69E-08 | 1          | 1.12E-04 |
| phe.Fasting_rs57287019 | S5 | CLCN3 | rs192765219 | S7  | DIAPH1      | 5.04E-14 | 2.06E-06    | 1.18E-10 | 7.69E-08 | 1          | 1.12E-04 |
| phe.Fasting_rs57287019 | S5 | CLCN3 | rs192770525 | S7  | DIAPH1      | 5.04E-14 | 2.06E-06    | 1.18E-10 | 7.69E-08 | 1          | 1.12E-04 |
| phe.Fasting_rs57287019 | S5 | CLCN3 | rs35990401  | S7  | DIAPH1      | 7.02E-14 | 2.87E-06    | 1.63E-10 | 2.70E-08 | 1          | 4.42E-05 |
| phe.Fasting_rs57287019 | S5 | CLCN3 | rs55900860  | S7  | DIAPH1      | 1.29E-14 | 5.25E-07    | 3.26E-11 | 1.13E-08 | 0.46094    | 2.07E-05 |
| phe.Fasting_rs57287019 | S5 | CLCN3 | rs57503635  | S3  | NA          | 5.38E-13 | 2.20E-05    | 1.13E-09 | 4.74E-06 | 1          | 4.38E-03 |
| phe.Fasting_rs57287019 | S5 | CLCN3 | rs6881310   | S23 | ISL1        | 3.54E-16 | 1.45E-08    | 1.16E-12 | 5.77E-11 | 0.00234866 | 1.84E-07 |
| phe.Fasting_rs57287019 | S5 | CLCN3 | rs77444916  | S23 | LOC642366   | 1.19E-16 | 4.86E-09    | 4.89E-13 | 4.41E-13 | 1.80E-05   | 2.36E-09 |
| phe.Fasting_rs57287019 | S5 | CLCN3 | rs79517926  | S15 | "DIAPH1,LOC | 1.75E-12 | 7.14E-05    | 3.34E-09 | 5.90E-08 | 1          | 8.92E-05 |
| phe.Fasting_rs57287019 | S5 | CLCN3 | rs80258830  | S24 | LOC642366   | 1.19E-16 | 4.86E-09    | 4.89E-13 | 4.41E-13 | 1.80E-05   | 2.36E-09 |
| phe.Fasting_rs57503635 | S3 | NA    | rs139070959 | S8  | RPN2        | 5.04E-17 | 2.06E-09    | 2.48E-13 | 1.75E-10 | 0.00714015 | 5.04E-07 |
| phe.Fasting_rs57503635 | S3 | NA    | rs145412529 | S8  | "RBL1,RPS3A | 2.98E-17 | 1.22E-09    | 1.70E-13 | 1.96E-10 | 0.00797955 | 5.58E-07 |
| phe.Fasting_rs57503635 | S3 | NA    | rs2285645   | S7  | MTMR3       | 4.35E-08 | 1           | 3.62E-05 | 1.78E-09 | 0.0725706  | 3.98E-06 |
| phe.Fasting_rs57503635 | S3 | NA    | rs73619637  | S8  | NA          | 4.00E-07 | 1           | 2.69E-04 | 1.60E-18 | 6.53E-11   | 7.51E-13 |
| phe.Fasting_rs57503635 | S3 | NA    | rs9620939   | S7  | MTMR3       | 4.81E-08 | 1           | 3.95E-05 | 6.03E-09 | 0.245416   | 1.17E-05 |
| phe.Fasting_rs57503635 | S3 | NA    | rs9625903   | S7  | MTMR3       | 5.71E-08 | 1           | 4.62E-05 | 2.48E-09 | 0.100887   | 5.35E-06 |
| phe.Fasting_rs58286737 | S8 | NEK1  | rs112027720 | S7  | DIAPH1      | 9.17E-12 | 0.000374383 | 1.48E-08 | 9.70E-09 | 0.394978   | 1.81E-05 |
| phe.Fasting_rs58286737 | S8 | NEK1  | rs112089881 | S8  | ZFAND4      | 1.84E-18 | 7.51E-11    | 3.89E-14 | 2.77E-09 | 0.112698   | 5.90E-06 |
| phe.Fasting_rs58286737 | S8 | NEK1  | rs113219478 | S7  | DIAPH1      | 9.17E-12 | 0.000374383 | 1.48E-08 | 9.70E-09 | 0.394978   | 1.81E-05 |
| phe.Fasting_rs58286737 | S8 | NEK1  | rs113357907 | S24 | ISL1        | 6.12E-18 | 2.50E-10    | 7.50E-14 | 4.03E-16 | 1.64E-08   | 1.16E-11 |
| phe.Fasting_rs58286737 | S8 | NEK1  | rs115888477 | S8  | NA          | 2.70E-15 | 1.10E-07    | 7.57E-12 | 2.67E-06 | 1          | 2.64E-03 |
| phe.Fasting_rs58286737 | S8 | NEK1  | rs116011837 | S9  | BRD2        | 2.29E-17 | 9.34E-10    | 1.45E-13 | 8.57E-11 | 0.00348829 | 2.64E-07 |
| phe.Fasting_rs58286737 | S8 | NEK1  | rs116120727 | S9  | BRD2        | 2.29E-17 | 9.34E-10    | 1.45E-13 | 8.57E-11 | 0.00348829 | 2.64E-07 |
| phe.Fasting_rs58286737 | S8 | NEK1  | rs116279995 | S20 | "PCDHGA4,PI | 2.15E-05 | 1           | 8.87E-03 | 9.47E-08 | 1          | 1.35E-04 |
| phe.Fasting_rs58286737 | S8 | NEK1  | rs138090701 | S5  | HDAC3       | 1.02E-12 | 4.17E-05    | 2.10E-09 | 4.63E-09 | 0.188358   | 9.27E-06 |
| phe.Fasting_rs58286737 | S8 | NEK1  | rs138136869 | S7  | DIAPH1      | 1.65E-12 | 6.74E-05    | 3.16E-09 | 1.25E-09 | 0.0510001  | 2.90E-06 |
| phe.Fasting_rs58286737 | S8 | NEK1  | rs138457103 | S10 | DIAPH1      | 5.43E-12 | 0.000221795 | 9.60E-09 | 9.11E-09 | 0.370794   | 1.72E-05 |
| phe.Fasting_rs58286737 | S8 | NEK1  | rs138487229 | S11 | DIAPH1      | 9.17E-12 | 0.000374383 | 1.48E-08 | 9.70E-09 | 0.394978   | 1.81E-05 |

|                        |    |      |             |     |             |          |             |          |          |           |          |
|------------------------|----|------|-------------|-----|-------------|----------|-------------|----------|----------|-----------|----------|
| phe.Fasting_rs58286737 | S8 | NEK1 | rs138738950 | S8  | "PCDHGB2,Pi | 9.17E-12 | 0.000374383 | 1.48E-08 | 9.66E-09 | 0.393262  | 1.81E-05 |
| phe.Fasting_rs58286737 | S8 | NEK1 | rs139297927 | S8  | DIAPH1      | 9.17E-12 | 0.000374383 | 1.48E-08 | 9.70E-09 | 0.394978  | 1.81E-05 |
| phe.Fasting_rs58286737 | S8 | NEK1 | rs139337303 | S8  | DIAPH1      | 9.17E-12 | 0.000374383 | 1.48E-08 | 9.70E-09 | 0.394978  | 1.81E-05 |
| phe.Fasting_rs58286737 | S8 | NEK1 | rs139403963 | S8  | DIAPH1      | 1.65E-12 | 6.74E-05    | 3.16E-09 | 1.25E-09 | 0.0510001 | 2.90E-06 |
| phe.Fasting_rs58286737 | S8 | NEK1 | rs139621309 | S18 | "LOC1005056 | 9.17E-12 | 0.000374383 | 1.48E-08 | 9.70E-09 | 0.394978  | 1.81E-05 |
| phe.Fasting_rs58286737 | S8 | NEK1 | rs139828110 | S8  | DIAPH1      | 1.65E-12 | 6.74E-05    | 3.16E-09 | 1.25E-09 | 0.0510001 | 2.90E-06 |
| phe.Fasting_rs58286737 | S8 | NEK1 | rs140070363 | S8  | DIAPH1      | 9.17E-12 | 0.000374383 | 1.48E-08 | 9.70E-09 | 0.394978  | 1.81E-05 |
| phe.Fasting_rs58286737 | S8 | NEK1 | rs140644750 | S13 | DIAPH1      | 9.17E-12 | 0.000374383 | 1.48E-08 | 9.70E-09 | 0.394978  | 1.81E-05 |
| phe.Fasting_rs58286737 | S8 | NEK1 | rs141022544 | S8  | DIAPH1      | 9.17E-12 | 0.000374383 | 1.48E-08 | 9.70E-09 | 0.394978  | 1.81E-05 |
| phe.Fasting_rs58286737 | S8 | NEK1 | rs141525984 | S5  | DIAPH1      | 9.17E-12 | 0.000374383 | 1.48E-08 | 9.70E-09 | 0.394978  | 1.81E-05 |
| phe.Fasting_rs58286737 | S8 | NEK1 | rs141926074 | S8  | ATE1        | 1.33E-06 | 1           | 7.83E-04 | 7.93E-15 | 3.23E-07  | 7.00E-11 |
| phe.Fasting_rs58286737 | S8 | NEK1 | rs142480565 | S8  | DIAPH1      | 9.17E-12 | 0.000374383 | 1.48E-08 | 9.70E-09 | 0.394978  | 1.81E-05 |
| phe.Fasting_rs58286737 | S8 | NEK1 | rs142718558 | S7  | "DIAPH1,LOC | 9.17E-12 | 0.000374383 | 1.48E-08 | 9.70E-09 | 0.394978  | 1.81E-05 |
| phe.Fasting_rs58286737 | S8 | NEK1 | rs142789100 | S8  | DIAPH1      | 1.65E-12 | 6.74E-05    | 3.16E-09 | 1.25E-09 | 0.0510001 | 2.90E-06 |
| phe.Fasting_rs58286737 | S8 | NEK1 | rs142812798 | S7  | DIAPH1      | 1.65E-12 | 6.74E-05    | 3.16E-09 | 1.25E-09 | 0.0510001 | 2.90E-06 |
| phe.Fasting_rs58286737 | S8 | NEK1 | rs143377827 | S13 | "DIAPH1,LOC | 1.45E-12 | 5.90E-05    | 2.83E-09 | 1.02E-09 | 0.0416914 | 2.43E-06 |
| phe.Fasting_rs58286737 | S8 | NEK1 | rs143691978 | S11 | DIAPH1      | 1.65E-12 | 6.74E-05    | 3.16E-09 | 2.15E-09 | 0.087529  | 4.71E-06 |
| phe.Fasting_rs58286737 | S8 | NEK1 | rs144081334 | S11 | DIAPH1      | 1.65E-12 | 6.74E-05    | 3.16E-09 | 2.15E-09 | 0.087529  | 4.71E-06 |
| phe.Fasting_rs58286737 | S8 | NEK1 | rs144613910 | S8  | DIAPH1      | 9.17E-12 | 0.000374383 | 1.48E-08 | 9.70E-09 | 0.394978  | 1.81E-05 |
| phe.Fasting_rs58286737 | S8 | NEK1 | rs145027704 | S11 | DIAPH1      | 1.65E-12 | 6.74E-05    | 3.16E-09 | 2.15E-09 | 0.087529  | 4.71E-06 |
| phe.Fasting_rs58286737 | S8 | NEK1 | rs146220673 | S7  | DIAPH1      | 9.17E-12 | 0.000374383 | 1.48E-08 | 9.70E-09 | 0.394978  | 1.81E-05 |
| phe.Fasting_rs58286737 | S8 | NEK1 | rs146622060 | S13 | DIAPH1      | 1.65E-12 | 6.74E-05    | 3.16E-09 | 2.15E-09 | 0.087529  | 4.71E-06 |
| phe.Fasting_rs58286737 | S8 | NEK1 | rs146878162 | S7  | DIAPH1      | 9.17E-12 | 0.000374383 | 1.48E-08 | 9.70E-09 | 0.394978  | 1.81E-05 |
| phe.Fasting_rs58286737 | S8 | NEK1 | rs1470889   | S5  | ZC3H3       | 3.60E-08 | 1           | 3.04E-05 | 6.78E-07 | 1         | 7.92E-04 |
| phe.Fasting_rs58286737 | S8 | NEK1 | rs1470890   | S5  | ZC3H3       | 3.60E-08 | 1           | 3.04E-05 | 6.78E-07 | 1         | 7.92E-04 |
| phe.Fasting_rs58286737 | S8 | NEK1 | rs147314451 | S8  | DIAPH1      | 9.17E-12 | 0.000374383 | 1.48E-08 | 9.70E-09 | 0.394978  | 1.81E-05 |
| phe.Fasting_rs58286737 | S8 | NEK1 | rs147417996 | S7  | DIAPH1      | 1.65E-12 | 6.74E-05    | 3.16E-09 | 2.15E-09 | 0.087529  | 4.71E-06 |
| phe.Fasting_rs58286737 | S8 | NEK1 | rs147506725 | S21 | "PCDHGA1,Pi | 2.15E-05 | 1           | 8.87E-03 | 9.47E-08 | 1         | 1.35E-04 |
| phe.Fasting_rs58286737 | S8 | NEK1 | rs147646948 | S7  | "LOC1005056 | 9.17E-12 | 0.000374383 | 1.48E-08 | 9.70E-09 | 0.394978  | 1.81E-05 |
| phe.Fasting_rs58286737 | S8 | NEK1 | rs147677041 | S8  | DIAPH1      | 1.65E-12 | 6.74E-05    | 3.16E-09 | 1.25E-09 | 0.0510001 | 2.90E-06 |
| phe.Fasting_rs58286737 | S8 | NEK1 | rs148116628 | S7  | DIAPH1      | 9.17E-12 | 0.000374383 | 1.48E-08 | 9.70E-09 | 0.394978  | 1.81E-05 |
| phe.Fasting_rs58286737 | S8 | NEK1 | rs148423011 | S7  | DIAPH1      | 9.17E-12 | 0.000374383 | 1.48E-08 | 9.70E-09 | 0.394978  | 1.81E-05 |
| phe.Fasting_rs58286737 | S8 | NEK1 | rs149019627 | S8  | DIAPH1      | 1.65E-12 | 6.74E-05    | 3.16E-09 | 1.25E-09 | 0.0510001 | 2.90E-06 |
| phe.Fasting_rs58286737 | S8 | NEK1 | rs149075406 | S8  | DIAPH1      | 9.17E-12 | 0.000374383 | 1.48E-08 | 9.70E-09 | 0.394978  | 1.81E-05 |
| phe.Fasting_rs58286737 | S8 | NEK1 | rs149334783 | S8  | DIAPH1      | 9.17E-12 | 0.000374383 | 1.48E-08 | 9.70E-09 | 0.394978  | 1.81E-05 |
| phe.Fasting_rs58286737 | S8 | NEK1 | rs149553852 | S21 | "PCDHGA10,  | 2.15E-05 | 1           | 8.87E-03 | 9.47E-08 | 1         | 1.35E-04 |
| phe.Fasting_rs58286737 | S8 | NEK1 | rs149716949 | S5  | DIAPH1      | 7.67E-13 | 3.13E-05    | 1.59E-09 | 1.12E-09 | 0.0455921 | 2.64E-06 |
| phe.Fasting_rs58286737 | S8 | NEK1 | rs149791570 | S5  | DIAPH1      | 1.65E-12 | 6.74E-05    | 3.16E-09 | 1.25E-09 | 0.0510001 | 2.90E-06 |
| phe.Fasting_rs58286737 | S8 | NEK1 | rs150452206 | S13 | "DIAPH1,LOC | 9.17E-12 | 0.000374383 | 1.48E-08 | 9.70E-09 | 0.394978  | 1.81E-05 |
| phe.Fasting_rs58286737 | S8 | NEK1 | rs150675915 | S7  | DIAPH1      | 9.17E-12 | 0.000374383 | 1.48E-08 | 9.70E-09 | 0.394978  | 1.81E-05 |

|                        |    |      |             |     |               |          |             |          |          |           |             |
|------------------------|----|------|-------------|-----|---------------|----------|-------------|----------|----------|-----------|-------------|
| phe.Fasting_rs58286737 | S8 | NEK1 | rs150765570 | S7  | DIAPH1        | 9.17E-12 | 0.000374383 | 1.48E-08 | 9.70E-09 | 0.394978  | 1.81E-05    |
| phe.Fasting_rs58286737 | S8 | NEK1 | rs150992994 | S11 | "PCDHGA5,PI   | 9.47E-12 | 0.000386737 | 1.52E-08 | 9.38E-09 | 0.381964  | 1.77E-05    |
| phe.Fasting_rs58286737 | S8 | NEK1 | rs151204700 | S8  | DIAPH1        | 9.17E-12 | 0.000374383 | 1.48E-08 | 9.70E-09 | 0.394978  | 1.81E-05    |
| phe.Fasting_rs58286737 | S8 | NEK1 | rs151330468 | S8  | DIAPH1        | 1.65E-12 | 6.74E-05    | 3.16E-09 | 2.15E-09 | 0.087529  | 4.71E-06    |
| phe.Fasting_rs58286737 | S8 | NEK1 | rs16894241  | S4  | HIST1H2BK     | 5.24E-08 | 1           | 4.28E-05 | 2.86E-07 | 1         | 3.63E-04    |
| phe.Fasting_rs58286737 | S8 | NEK1 | rs180772028 | S8  | "DIAPH1,LOC   | 9.17E-12 | 0.000374383 | 1.48E-08 | 9.70E-09 | 0.394978  | 1.81E-05    |
| phe.Fasting_rs58286737 | S8 | NEK1 | rs181224861 | S7  | DIAPH1        | 9.17E-12 | 0.000374383 | 1.48E-08 | 9.70E-09 | 0.394978  | 1.81E-05    |
| phe.Fasting_rs58286737 | S8 | NEK1 | rs181247960 | S21 | "PCDHGA9,PI   | 2.15E-05 | 1           | 8.87E-03 | 9.47E-08 | 1         | 1.35E-04    |
| phe.Fasting_rs58286737 | S8 | NEK1 | rs181824655 | S21 | "PCDHGB6,PI   | 2.15E-05 | 1           | 8.87E-03 | 9.47E-08 | 1         | 1.35E-04    |
| phe.Fasting_rs58286737 | S8 | NEK1 | rs182714699 | S8  | DIAPH1        | 9.17E-12 | 0.000374383 | 1.48E-08 | 9.70E-09 | 0.394978  | 1.81E-05    |
| phe.Fasting_rs58286737 | S8 | NEK1 | rs182965141 | S8  | DIAPH1        | 2.01E-12 | 8.19E-05    | 3.80E-09 | 6.50E-10 | 0.0264673 | 1.63E-06    |
| phe.Fasting_rs58286737 | S8 | NEK1 | rs183597049 | S7  | DIAPH1        | 9.17E-12 | 0.000374383 | 1.48E-08 | 9.70E-09 | 0.394978  | 1.81E-05    |
| phe.Fasting_rs58286737 | S8 | NEK1 | rs183980988 | S2  | NA            | 9.17E-12 | 0.000374383 | 1.48E-08 | 9.70E-09 | 0.394978  | 1.81E-05    |
| phe.Fasting_rs58286737 | S8 | NEK1 | rs184233232 | S7  | DIAPH1        | 9.17E-12 | 0.000374383 | 1.48E-08 | 9.70E-09 | 0.394978  | 1.81E-05    |
| phe.Fasting_rs58286737 | S8 | NEK1 | rs184509477 | S13 | "PCDHGB4,PI   | 9.17E-12 | 0.000374383 | 1.48E-08 | 9.70E-09 | 0.394978  | 1.81E-05    |
| phe.Fasting_rs58286737 | S8 | NEK1 | rs185069296 | S15 | "LOC100505056 | 9.17E-12 | 3.74E-04    | 1.48E-08 | 9.70E-09 | 0.394978  | 1.81E-05    |
| phe.Fasting_rs58286737 | S8 | NEK1 | rs185502834 | S8  | DIAPH1        | 1.65E-12 | 6.74E-05    | 3.16E-09 | 1.25E-09 | 0.0510001 | 2.90E-06    |
| phe.Fasting_rs58286737 | S8 | NEK1 | rs185759881 | S7  | DIAPH1        | 9.17E-12 | 0.000374383 | 1.48E-08 | 9.70E-09 | 0.394978  | 1.81E-05    |
| phe.Fasting_rs58286737 | S8 | NEK1 | rs186288044 | S21 | "PCDHGB4,PI   | 2.15E-05 | 1.00E+00    | 8.87E-03 | 9.47E-08 | 1         | 1.35E-04    |
| phe.Fasting_rs58286737 | S8 | NEK1 | rs187000011 | S11 | DIAPH1        | 9.17E-12 | 3.74E-04    | 1.48E-08 | 9.70E-09 | 0.394978  | 1.81E-05    |
| phe.Fasting_rs58286737 | S8 | NEK1 | rs188981295 | S5  | "RPS27AP10,   | 9.17E-12 | 3.74E-04    | 1.48E-08 | 9.70E-09 | 0.394978  | 1.81E-05    |
| phe.Fasting_rs58286737 | S8 | NEK1 | rs190559574 | S7  | DIAPH1        | 1.65E-12 | 6.74E-05    | 3.16E-09 | 1.25E-09 | 0.0510001 | 2.90E-06    |
| phe.Fasting_rs58286737 | S8 | NEK1 | rs191544043 | S8  | DIAPH1        | 9.17E-12 | 3.74E-04    | 1.48E-08 | 9.70E-09 | 0.394978  | 1.81E-05    |
| phe.Fasting_rs58286737 | S8 | NEK1 | rs191766712 | S7  | DIAPH1        | 9.17E-12 | 0.000374383 | 1.48E-08 | 9.70E-09 | 0.394978  | 1.81E-05    |
| phe.Fasting_rs58286737 | S8 | NEK1 | rs192690040 | S7  | DIAPH1        | 9.17E-12 | 0.000374383 | 1.48E-08 | 9.70E-09 | 0.394978  | 1.81E-05    |
| phe.Fasting_rs58286737 | S8 | NEK1 | rs192765219 | S7  | DIAPH1        | 9.17E-12 | 0.000374383 | 1.48E-08 | 9.70E-09 | 0.394978  | 1.81E-05    |
| phe.Fasting_rs58286737 | S8 | NEK1 | rs192770525 | S7  | DIAPH1        | 9.17E-12 | 0.000374383 | 1.48E-08 | 9.70E-09 | 0.394978  | 1.81E-05    |
| phe.Fasting_rs58286737 | S8 | NEK1 | rs2924507   | S5  | ZC3H3         | 3.60E-08 | 1           | 3.04E-05 | 6.78E-07 | 1         | 0.000791674 |
| phe.Fasting_rs58286737 | S8 | NEK1 | rs2924508   | S8  | ZC3H3         | 3.60E-08 | 1           | 3.04E-05 | 9.52E-07 | 1         | 0.00108069  |
| phe.Fasting_rs58286737 | S8 | NEK1 | rs2924511   | S7  | ZC3H3         | 3.60E-08 | 1           | 3.04E-05 | 5.76E-07 | 1         | 0.000680958 |
| phe.Fasting_rs58286737 | S8 | NEK1 | rs2924512   | S7  | ZC3H3         | 4.02E-08 | 1           | 3.37E-05 | 7.17E-07 | 1         | 0.00083355  |
| phe.Fasting_rs58286737 | S8 | NEK1 | rs2956376   | S8  | ZC3H3         | 3.60E-08 | 1           | 3.04E-05 | 3.89E-07 | 1         | 0.000476148 |
| phe.Fasting_rs58286737 | S8 | NEK1 | rs2980270   | S7  | ZC3H3         | 3.60E-08 | 1           | 3.04E-05 | 3.89E-07 | 1         | 0.000476148 |
| phe.Fasting_rs58286737 | S8 | NEK1 | rs2980272   | S7  | ZC3H3         | 4.02E-08 | 1           | 3.37E-05 | 7.52E-07 | 1         | 0.000869902 |
| phe.Fasting_rs58286737 | S8 | NEK1 | rs2980275   | S5  | ZC3H3         | 3.60E-08 | 1           | 3.04E-05 | 6.78E-07 | 1         | 0.000791674 |
| phe.Fasting_rs58286737 | S8 | NEK1 | rs35990401  | S7  | DIAPH1        | 8.40E-12 | 0.000343123 | 1.39E-08 | 3.62E-09 | 0.147164  | 7.50E-06    |
| phe.Fasting_rs58286737 | S8 | NEK1 | rs366767    | S5  | ZC3H3         | 6.34E-08 | 1           | 5.08E-05 | 4.19E-07 | 1         | 0.000508745 |
| phe.Fasting_rs58286737 | S8 | NEK1 | rs55900860  | S7  | DIAPH1        | 1.65E-12 | 6.74E-05    | 3.16E-09 | 1.25E-09 | 0.0510001 | 2.90E-06    |
| phe.Fasting_rs58286737 | S8 | NEK1 | rs57503635  | S3  | NA            | 7.93E-17 | 3.24E-09    | 3.50E-13 | 1.02E-05 | 1         | 0.00831784  |
| phe.Fasting_rs58286737 | S8 | NEK1 | rs6881310   | S23 | ISL1          | 4.23E-17 | 1.73E-09    | 2.22E-13 | 8.72E-13 | 3.55E-05  | 4.15E-09    |

|                        |     |       |             |     |             |          |             |          |          |             |             |
|------------------------|-----|-------|-------------|-----|-------------|----------|-------------|----------|----------|-------------|-------------|
| phe.Fasting_rs58286737 | S8  | NEK1  | rs73619637  | S8  | NA          | 1.02E-16 | 4.15E-09    | 4.31E-13 | 6.10E-09 | 0.248478    | 1.19E-05    |
| phe.Fasting_rs58286737 | S8  | NEK1  | rs73794928  | S13 | "PCDHGA9,Pi | 1.55E-05 | 1           | 6.66E-03 | 1.19E-05 | 1           | 0.0093559   |
| phe.Fasting_rs58286737 | S8  | NEK1  | rs77444916  | S23 | LOC642366   | 1.50E-17 | 6.11E-10    | 1.18E-13 | 3.78E-16 | 1.54E-08    | 1.16E-11    |
| phe.Fasting_rs58286737 | S8  | NEK1  | rs78703708  | S7  | FAF2        | 9.25E-18 | 3.78E-10    | 9.24E-14 | 7.48E-08 | 1           | 0.000109374 |
| phe.Fasting_rs58286737 | S8  | NEK1  | rs79517926  | S15 | "DIAPH1,LOC | 2.69E-12 | 0.000109672 | 4.97E-09 | 8.36E-10 | 0.0340091   | 2.03E-06    |
| phe.Fasting_rs58286737 | S8  | NEK1  | rs80258830  | S24 | LOC642366   | 1.50E-17 | 6.11E-10    | 1.18E-13 | 3.78E-16 | 1.54E-08    | 1.16E-11    |
| phe.Fasting_rs58417766 | S7  | PHC3  | rs111576333 | S5  | TMEM64      | 2.07E-08 | 0.844108    | 1.82E-05 | 2.31E-10 | 0.00941342  | 6.43E-07    |
| phe.Fasting_rs58417766 | S7  | PHC3  | rs112091318 | S5  | TMEM64      | 6.28E-09 | 0.256524    | 6.07E-06 | 3.37E-10 | 0.013698    | 8.96E-07    |
| phe.Fasting_rs58417766 | S7  | PHC3  | rs112348319 | S8  | SPTLC1      | 1.92E-05 | 1           | 8.06E-03 | 7.84E-10 | 0.0319139   | 1.93E-06    |
| phe.Fasting_rs58417766 | S7  | PHC3  | rs112608164 | S8  | SPTLC1      | 1.92E-05 | 1           | 8.06E-03 | 7.84E-10 | 0.0319139   | 1.93E-06    |
| phe.Fasting_rs58417766 | S7  | PHC3  | rs113568654 | S12 | SPTLC1      | 1.84E-05 | 1           | 7.76E-03 | 1.04E-08 | 0.421423    | 1.91E-05    |
| phe.Fasting_rs58417766 | S7  | PHC3  | rs114565620 | S8  | RCL1        | 2.84E-19 | 1.16E-11    | 2.40E-14 | 4.01E-07 | 1           | 0.000489631 |
| phe.Fasting_rs58417766 | S7  | PHC3  | rs115083290 | S19 | NA          | 8.85E-08 | 1           | 6.83E-05 | 3.40E-09 | 0.138522    | 7.12E-06    |
| phe.Fasting_rs58417766 | S7  | PHC3  | rs115752779 | S19 | NA          | 8.85E-08 | 1           | 6.83E-05 | 3.40E-09 | 0.138522    | 7.12E-06    |
| phe.Fasting_rs58417766 | S7  | PHC3  | rs115888477 | S8  | NA          | 1.34E-06 | 1           | 7.91E-04 | 7.82E-11 | 0.00318365  | 2.44E-07    |
| phe.Fasting_rs58417766 | S7  | PHC3  | rs116011837 | S9  | BRD2        | 2.70E-13 | 1.10E-05    | 5.81E-10 | 2.07E-11 | 0.000841008 | 7.31E-08    |
| phe.Fasting_rs58417766 | S7  | PHC3  | rs116120727 | S9  | BRD2        | 2.70E-13 | 1.10E-05    | 5.81E-10 | 2.07E-11 | 0.000841008 | 7.31E-08    |
| phe.Fasting_rs58417766 | S7  | PHC3  | rs116548615 | S8  | TMEM45B     | 5.29E-19 | 2.16E-11    | 2.49E-14 | 7.92E-10 | 0.0322544   | 1.95E-06    |
| phe.Fasting_rs58417766 | S7  | PHC3  | rs11989304  | S4  | TMEM64      | 2.07E-08 | 0.844108    | 1.82E-05 | 2.29E-10 | 0.00932569  | 6.39E-07    |
| phe.Fasting_rs58417766 | S7  | PHC3  | rs140524622 | S7  | MRPL10      | 2.30E-08 | 0.93902     | 2.01E-05 | 2.14E-06 | 1           | 0.00219216  |
| phe.Fasting_rs58417766 | S7  | PHC3  | rs141926074 | S8  | ATE1        | 1.23E-19 | 5.04E-12    | 2.23E-14 | 1.34E-11 | 0.000545558 | 4.89E-08    |
| phe.Fasting_rs58417766 | S7  | PHC3  | rs73392640  | S8  | POLR3B      | 6.58E-08 | 1           | 5.26E-05 | 8.97E-06 | 1           | 0.00747055  |
| phe.Fasting_rs58417766 | S7  | PHC3  | rs74627895  | S8  | TMEM64      | 6.28E-09 | 0.256524    | 6.07E-06 | 1.27E-06 | 1           | 0.00139909  |
| phe.Fasting_rs58417766 | S7  | PHC3  | rs75350765  | S5  | RCL1        | 2.84E-19 | 1.16E-11    | 2.40E-14 | 4.01E-07 | 1           | 0.000489631 |
| phe.Fasting_rs58417766 | S7  | PHC3  | rs75506779  | S5  | TMCO3       | 7.38E-14 | 3.01E-06    | 1.70E-10 | 3.50E-06 | 1           | 0.00334821  |
| phe.Fasting_rs58417766 | S7  | PHC3  | rs75949566  | S5  | TMEM64      | 2.26E-08 | 0.923876    | 1.98E-05 | 3.24E-10 | 0.0132      | 8.70E-07    |
| phe.Fasting_rs58417766 | S7  | PHC3  | rs76542405  | S5  | SPTLC1      | 1.92E-05 | 1           | 8.06E-03 | 7.84E-10 | 0.0319139   | 1.93E-06    |
| phe.Fasting_rs58417766 | S7  | PHC3  | rs77523818  | S7  | SPTLC1      | 1.92E-05 | 1           | 8.06E-03 | 7.84E-10 | 0.0319139   | 1.93E-06    |
| phe.Fasting_rs58417766 | S7  | PHC3  | rs7763107   | S8  | FARS2       | 1.30E-09 | 0.0532742   | 1.41E-06 | 2.87E-06 | 1           | 0.00281845  |
| phe.Fasting_rs58417766 | S7  | PHC3  | rs77845645  | S21 | NA          | 9.87E-09 | 0.403004    | 9.22E-06 | 9.90E-13 | 4.03E-05    | 4.68E-09    |
| phe.Fasting_rs58417766 | S7  | PHC3  | rs78990344  | S2  | LOC10050631 | 2.07E-08 | 0.844108    | 1.82E-05 | 2.29E-10 | 0.00932569  | 6.39E-07    |
| phe.Fasting_rs59570696 | S5  | UBE2W | rs139070959 | S8  | RPN2        | 1.22E-06 | 1           | 7.25E-04 | 2.19E-07 | 1           | 0.000286927 |
| phe.Fasting_rs59570696 | S5  | UBE2W | rs145412529 | S8  | "RBL1,RPS3A | 6.24E-07 | 1           | 4.00E-04 | 1.56E-06 | 1           | 0.00166337  |
| phe.Fasting_rs60011869 | S16 | NA    | rs115083290 | S19 | NA          | 6.97E-07 | 1           | 4.41E-04 | 4.96E-08 | 1           | 7.63E-05    |
| phe.Fasting_rs60011869 | S16 | NA    | rs115752779 | S19 | NA          | 6.97E-07 | 1           | 4.41E-04 | 4.96E-08 | 1           | 7.63E-05    |
| phe.Fasting_rs60011869 | S16 | NA    | rs139070959 | S8  | RPN2        | 6.07E-18 | 2.48E-10    | 7.49E-14 | 5.74E-11 | 0.00233779  | 1.84E-07    |
| phe.Fasting_rs60011869 | S16 | NA    | rs141926074 | S8  | ATE1        | 3.63E-18 | 1.48E-10    | 5.68E-14 | 1.59E-08 | 0.648152    | 2.80E-05    |
| phe.Fasting_rs60011869 | S16 | NA    | rs145412529 | S8  | "RBL1,RPS3A | 3.45E-18 | 1.41E-10    | 5.60E-14 | 6.57E-11 | 0.00267324  | 2.08E-07    |
| phe.Fasting_rs60011869 | S16 | NA    | rs57503635  | S3  | NA          | 7.45E-17 | 3.04E-09    | 3.33E-13 | 5.95E-13 | 2.42E-05    | 2.94E-09    |
| phe.Fasting_rs61267727 | S8  | NEK1  | rs112027720 | S7  | DIAPH1      | 9.17E-12 | 0.000374383 | 1.48E-08 | 9.70E-09 | 0.394978    | 1.81E-05    |



|                        |    |      |             |     |               |          |             |          |          |            |             |
|------------------------|----|------|-------------|-----|---------------|----------|-------------|----------|----------|------------|-------------|
| phe.Fasting_rs61267727 | S8 | NEK1 | rs112089881 | S8  | ZFAND4        | 1.84E-18 | 7.51E-11    | 3.89E-14 | 2.77E-09 | 0.112698   | 5.90E-06    |
| phe.Fasting_rs61267727 | S8 | NEK1 | rs113219478 | S7  | DIAPH1        | 9.17E-12 | 0.000374383 | 1.48E-08 | 9.70E-09 | 0.394978   | 1.81E-05    |
| phe.Fasting_rs61267727 | S8 | NEK1 | rs113357907 | S24 | ISL1          | 6.12E-18 | 2.50E-10    | 7.50E-14 | 4.03E-16 | 1.64E-08   | 1.16E-11    |
| phe.Fasting_rs61267727 | S8 | NEK1 | rs115888477 | S8  | NA            | 2.70E-15 | 1.10E-07    | 7.57E-12 | 2.67E-06 | 1          | 0.00264447  |
| phe.Fasting_rs61267727 | S8 | NEK1 | rs116011837 | S9  | BRD2          | 2.29E-17 | 9.34E-10    | 1.45E-13 | 8.57E-11 | 0.00348829 | 2.64E-07    |
| phe.Fasting_rs61267727 | S8 | NEK1 | rs116120727 | S9  | BRD2          | 2.29E-17 | 9.34E-10    | 1.45E-13 | 8.57E-11 | 0.00348829 | 2.64E-07    |
| phe.Fasting_rs61267727 | S8 | NEK1 | rs116279995 | S20 | "PCDHGA4,Pi   | 2.15E-05 | 1           | 8.87E-03 | 9.47E-08 | 1          | 0.000134747 |
| phe.Fasting_rs61267727 | S8 | NEK1 | rs138090701 | S5  | HDAC3         | 1.02E-12 | 4.17E-05    | 2.10E-09 | 4.63E-09 | 0.188358   | 9.27E-06    |
| phe.Fasting_rs61267727 | S8 | NEK1 | rs138136869 | S7  | DIAPH1        | 1.65E-12 | 6.74E-05    | 3.16E-09 | 1.25E-09 | 0.0510001  | 2.90E-06    |
| phe.Fasting_rs61267727 | S8 | NEK1 | rs138457103 | S10 | DIAPH1        | 5.43E-12 | 0.000221795 | 9.60E-09 | 9.11E-09 | 0.370794   | 1.72E-05    |
| phe.Fasting_rs61267727 | S8 | NEK1 | rs138487229 | S11 | DIAPH1        | 9.17E-12 | 0.000374383 | 1.48E-08 | 9.70E-09 | 0.394978   | 1.81E-05    |
| phe.Fasting_rs61267727 | S8 | NEK1 | rs138738950 | S8  | "PCDHGB2,Pi   | 9.17E-12 | 0.000374383 | 1.48E-08 | 9.66E-09 | 0.393262   | 1.81E-05    |
| phe.Fasting_rs61267727 | S8 | NEK1 | rs139297927 | S8  | DIAPH1        | 9.17E-12 | 0.000374383 | 1.48E-08 | 9.70E-09 | 0.394978   | 1.81E-05    |
| phe.Fasting_rs61267727 | S8 | NEK1 | rs139337303 | S8  | DIAPH1        | 9.17E-12 | 0.000374383 | 1.48E-08 | 9.70E-09 | 0.394978   | 1.81E-05    |
| phe.Fasting_rs61267727 | S8 | NEK1 | rs139403963 | S8  | DIAPH1        | 1.65E-12 | 6.74E-05    | 3.16E-09 | 1.25E-09 | 0.0510001  | 2.90E-06    |
| phe.Fasting_rs61267727 | S8 | NEK1 | rs139621309 | S18 | "LOC100505056 | 9.17E-12 | 0.000374383 | 1.48E-08 | 9.70E-09 | 0.394978   | 1.81E-05    |
| phe.Fasting_rs61267727 | S8 | NEK1 | rs139828110 | S8  | DIAPH1        | 1.65E-12 | 6.74E-05    | 3.16E-09 | 1.25E-09 | 0.0510001  | 2.90E-06    |
| phe.Fasting_rs61267727 | S8 | NEK1 | rs140070363 | S8  | DIAPH1        | 9.17E-12 | 0.000374383 | 1.48E-08 | 9.70E-09 | 0.394978   | 1.81E-05    |
| phe.Fasting_rs61267727 | S8 | NEK1 | rs140644750 | S13 | DIAPH1        | 9.17E-12 | 0.000374383 | 1.48E-08 | 9.70E-09 | 0.394978   | 1.81E-05    |
| phe.Fasting_rs61267727 | S8 | NEK1 | rs141022544 | S8  | DIAPH1        | 9.17E-12 | 0.000374383 | 1.48E-08 | 9.70E-09 | 0.394978   | 1.81E-05    |
| phe.Fasting_rs61267727 | S8 | NEK1 | rs141525984 | S5  | DIAPH1        | 9.17E-12 | 0.000374383 | 1.48E-08 | 9.70E-09 | 0.394978   | 1.81E-05    |
| phe.Fasting_rs61267727 | S8 | NEK1 | rs141926074 | S8  | ATE1          | 1.33E-06 | 1           | 7.83E-04 | 7.93E-15 | 3.23E-07   | 7.00E-11    |
| phe.Fasting_rs61267727 | S8 | NEK1 | rs142480565 | S8  | DIAPH1        | 9.17E-12 | 0.000374383 | 1.48E-08 | 9.70E-09 | 0.394978   | 1.81E-05    |
| phe.Fasting_rs61267727 | S8 | NEK1 | rs142718558 | S7  | "DIAPH1,LOC   | 9.17E-12 | 0.000374383 | 1.48E-08 | 9.70E-09 | 0.394978   | 1.81E-05    |
| phe.Fasting_rs61267727 | S8 | NEK1 | rs142789100 | S8  | DIAPH1        | 1.65E-12 | 6.74E-05    | 3.16E-09 | 1.25E-09 | 0.0510001  | 2.90E-06    |
| phe.Fasting_rs61267727 | S8 | NEK1 | rs142812798 | S7  | DIAPH1        | 1.65E-12 | 6.74E-05    | 3.16E-09 | 1.25E-09 | 0.0510001  | 2.90E-06    |
| phe.Fasting_rs61267727 | S8 | NEK1 | rs143377827 | S13 | "DIAPH1,LOC   | 1.45E-12 | 5.90E-05    | 2.83E-09 | 1.02E-09 | 0.0416914  | 2.43E-06    |
| phe.Fasting_rs61267727 | S8 | NEK1 | rs143691978 | S11 | DIAPH1        | 1.65E-12 | 6.74E-05    | 3.16E-09 | 2.15E-09 | 0.087529   | 4.71E-06    |
| phe.Fasting_rs61267727 | S8 | NEK1 | rs144081334 | S11 | DIAPH1        | 1.65E-12 | 6.74E-05    | 3.16E-09 | 2.15E-09 | 0.087529   | 4.71E-06    |
| phe.Fasting_rs61267727 | S8 | NEK1 | rs144613910 | S8  | DIAPH1        | 9.17E-12 | 0.000374383 | 1.48E-08 | 9.70E-09 | 0.394978   | 1.81E-05    |
| phe.Fasting_rs61267727 | S8 | NEK1 | rs145027704 | S11 | DIAPH1        | 1.65E-12 | 6.74E-05    | 3.16E-09 | 2.15E-09 | 0.087529   | 4.71E-06    |
| phe.Fasting_rs61267727 | S8 | NEK1 | rs146220673 | S7  | DIAPH1        | 9.17E-12 | 0.000374383 | 1.48E-08 | 9.70E-09 | 0.394978   | 1.81E-05    |
| phe.Fasting_rs61267727 | S8 | NEK1 | rs146622060 | S13 | DIAPH1        | 1.65E-12 | 6.74E-05    | 3.16E-09 | 2.15E-09 | 0.087529   | 4.71E-06    |
| phe.Fasting_rs61267727 | S8 | NEK1 | rs146878162 | S7  | DIAPH1        | 9.17E-12 | 0.000374383 | 1.48E-08 | 9.70E-09 | 0.394978   | 1.81E-05    |
| phe.Fasting_rs61267727 | S8 | NEK1 | rs1470889   | S5  | ZC3H3         | 3.60E-08 | 1           | 3.04E-05 | 6.78E-07 | 1          | 0.000791674 |
| phe.Fasting_rs61267727 | S8 | NEK1 | rs1470890   | S5  | ZC3H3         | 3.60E-08 | 1           | 3.04E-05 | 6.78E-07 | 1          | 0.000791674 |
| phe.Fasting_rs61267727 | S8 | NEK1 | rs147314451 | S8  | DIAPH1        | 9.17E-12 | 0.000374383 | 1.48E-08 | 9.70E-09 | 0.394978   | 1.81E-05    |
| phe.Fasting_rs61267727 | S8 | NEK1 | rs147417996 | S7  | DIAPH1        | 1.65E-12 | 6.74E-05    | 3.16E-09 | 2.15E-09 | 0.087529   | 4.71E-06    |
| phe.Fasting_rs61267727 | S8 | NEK1 | rs147506725 | S21 | "PCDHGA1,Pi   | 2.15E-05 | 1           | 8.87E-03 | 9.47E-08 | 1          | 0.000134747 |
| phe.Fasting_rs61267727 | S8 | NEK1 | rs147646948 | S7  | "LOC100505056 | 9.17E-12 | 0.000374383 | 1.48E-08 | 9.70E-09 | 0.394978   | 1.81E-05    |

|                        |    |      |             |     |             |          |             |          |          |           |             |
|------------------------|----|------|-------------|-----|-------------|----------|-------------|----------|----------|-----------|-------------|
| phe.Fasting_rs61267727 | S8 | NEK1 | rs147677041 | S8  | DIAPH1      | 1.65E-12 | 6.74E-05    | 3.16E-09 | 1.25E-09 | 0.0510001 | 2.90E-06    |
| phe.Fasting_rs61267727 | S8 | NEK1 | rs148116628 | S7  | DIAPH1      | 9.17E-12 | 0.000374383 | 1.48E-08 | 9.70E-09 | 0.394978  | 1.81E-05    |
| phe.Fasting_rs61267727 | S8 | NEK1 | rs148423011 | S7  | DIAPH1      | 9.17E-12 | 0.000374383 | 1.48E-08 | 9.70E-09 | 0.394978  | 1.81E-05    |
| phe.Fasting_rs61267727 | S8 | NEK1 | rs149019627 | S8  | DIAPH1      | 1.65E-12 | 6.74E-05    | 3.16E-09 | 1.25E-09 | 0.0510001 | 2.90E-06    |
| phe.Fasting_rs61267727 | S8 | NEK1 | rs149075406 | S8  | DIAPH1      | 9.17E-12 | 0.000374383 | 1.48E-08 | 9.70E-09 | 0.394978  | 1.81E-05    |
| phe.Fasting_rs61267727 | S8 | NEK1 | rs149334783 | S8  | DIAPH1      | 9.17E-12 | 0.000374383 | 1.48E-08 | 9.70E-09 | 0.394978  | 1.81E-05    |
| phe.Fasting_rs61267727 | S8 | NEK1 | rs149553852 | S21 | "PCDHGA10,  | 2.15E-05 | 1           | 8.87E-03 | 9.47E-08 | 1         | 0.000134747 |
| phe.Fasting_rs61267727 | S8 | NEK1 | rs149716949 | S5  | DIAPH1      | 7.67E-13 | 3.13E-05    | 1.59E-09 | 1.12E-09 | 0.0455921 | 2.64E-06    |
| phe.Fasting_rs61267727 | S8 | NEK1 | rs149791570 | S5  | DIAPH1      | 1.65E-12 | 6.74E-05    | 3.16E-09 | 1.25E-09 | 0.0510001 | 2.90E-06    |
| phe.Fasting_rs61267727 | S8 | NEK1 | rs150452206 | S13 | "DIAPH1,LOC | 9.17E-12 | 0.000374383 | 1.48E-08 | 9.70E-09 | 0.394978  | 1.81E-05    |
| phe.Fasting_rs61267727 | S8 | NEK1 | rs150675915 | S7  | DIAPH1      | 9.17E-12 | 0.000374383 | 1.48E-08 | 9.70E-09 | 0.394978  | 1.81E-05    |
| phe.Fasting_rs61267727 | S8 | NEK1 | rs150765570 | S7  | DIAPH1      | 9.17E-12 | 0.000374383 | 1.48E-08 | 9.70E-09 | 0.394978  | 1.81E-05    |
| phe.Fasting_rs61267727 | S8 | NEK1 | rs150992994 | S11 | "PCDHGA5,Pi | 9.47E-12 | 0.000386737 | 1.52E-08 | 9.38E-09 | 0.381964  | 1.77E-05    |
| phe.Fasting_rs61267727 | S8 | NEK1 | rs151204700 | S8  | DIAPH1      | 9.17E-12 | 0.000374383 | 1.48E-08 | 9.70E-09 | 0.394978  | 1.81E-05    |
| phe.Fasting_rs61267727 | S8 | NEK1 | rs151330468 | S8  | DIAPH1      | 1.65E-12 | 6.74E-05    | 3.16E-09 | 2.15E-09 | 0.087529  | 4.71E-06    |
| phe.Fasting_rs61267727 | S8 | NEK1 | rs16894241  | S4  | HIST1H2BK   | 5.24E-08 | 1           | 4.28E-05 | 2.86E-07 | 1         | 0.000363243 |
| phe.Fasting_rs61267727 | S8 | NEK1 | rs180772028 | S8  | "DIAPH1,LOC | 9.17E-12 | 0.000374383 | 1.48E-08 | 9.70E-09 | 0.394978  | 1.81E-05    |
| phe.Fasting_rs61267727 | S8 | NEK1 | rs181224861 | S7  | DIAPH1      | 9.17E-12 | 0.000374383 | 1.48E-08 | 9.70E-09 | 0.394978  | 1.81E-05    |
| phe.Fasting_rs61267727 | S8 | NEK1 | rs181247960 | S21 | "PCDHGA9,Pi | 2.15E-05 | 1           | 8.87E-03 | 9.47E-08 | 1         | 0.000134747 |
| phe.Fasting_rs61267727 | S8 | NEK1 | rs181824655 | S21 | "PCDHGB6,Pi | 2.15E-05 | 1           | 8.87E-03 | 9.47E-08 | 1         | 0.000134747 |
| phe.Fasting_rs61267727 | S8 | NEK1 | rs182714699 | S8  | DIAPH1      | 9.17E-12 | 0.000374383 | 1.48E-08 | 9.70E-09 | 0.394978  | 1.81E-05    |
| phe.Fasting_rs61267727 | S8 | NEK1 | rs182965141 | S8  | DIAPH1      | 2.01E-12 | 8.19E-05    | 3.80E-09 | 6.50E-10 | 0.0264673 | 1.63E-06    |
| phe.Fasting_rs61267727 | S8 | NEK1 | rs183597049 | S7  | DIAPH1      | 9.17E-12 | 0.000374383 | 1.48E-08 | 9.70E-09 | 0.394978  | 1.81E-05    |
| phe.Fasting_rs61267727 | S8 | NEK1 | rs183980988 | S2  | NA          | 9.17E-12 | 0.000374383 | 1.48E-08 | 9.70E-09 | 0.394978  | 1.81E-05    |
| phe.Fasting_rs61267727 | S8 | NEK1 | rs184233232 | S7  | DIAPH1      | 9.17E-12 | 0.000374383 | 1.48E-08 | 9.70E-09 | 0.394978  | 1.81E-05    |
| phe.Fasting_rs61267727 | S8 | NEK1 | rs184509477 | S13 | "PCDHGB4,Pi | 9.17E-12 | 0.000374383 | 1.48E-08 | 9.70E-09 | 0.394978  | 1.81E-05    |
| phe.Fasting_rs61267727 | S8 | NEK1 | rs185069296 | S15 | "LOC1005056 | 9.17E-12 | 0.000374383 | 1.48E-08 | 9.70E-09 | 0.394978  | 1.81E-05    |
| phe.Fasting_rs61267727 | S8 | NEK1 | rs185502834 | S8  | DIAPH1      | 1.65E-12 | 6.74E-05    | 3.16E-09 | 1.25E-09 | 0.0510001 | 2.90E-06    |
| phe.Fasting_rs61267727 | S8 | NEK1 | rs185759881 | S7  | DIAPH1      | 9.17E-12 | 0.000374383 | 1.48E-08 | 9.70E-09 | 0.394978  | 1.81E-05    |
| phe.Fasting_rs61267727 | S8 | NEK1 | rs186288044 | S21 | "PCDHGB4,Pi | 2.15E-05 | 1           | 8.87E-03 | 9.47E-08 | 1         | 0.000134747 |
| phe.Fasting_rs61267727 | S8 | NEK1 | rs187000011 | S11 | DIAPH1      | 9.17E-12 | 0.000374383 | 1.48E-08 | 9.70E-09 | 0.394978  | 1.81E-05    |
| phe.Fasting_rs61267727 | S8 | NEK1 | rs188981295 | S5  | "RPS27AP10, | 9.17E-12 | 0.000374383 | 1.48E-08 | 9.70E-09 | 0.394978  | 1.81E-05    |
| phe.Fasting_rs61267727 | S8 | NEK1 | rs190559574 | S7  | DIAPH1      | 1.65E-12 | 6.74E-05    | 3.16E-09 | 1.25E-09 | 0.0510001 | 2.90E-06    |
| phe.Fasting_rs61267727 | S8 | NEK1 | rs191544043 | S8  | DIAPH1      | 9.17E-12 | 0.000374383 | 1.48E-08 | 9.70E-09 | 0.394978  | 1.81E-05    |
| phe.Fasting_rs61267727 | S8 | NEK1 | rs191766712 | S7  | DIAPH1      | 9.17E-12 | 0.000374383 | 1.48E-08 | 9.70E-09 | 0.394978  | 1.81E-05    |
| phe.Fasting_rs61267727 | S8 | NEK1 | rs192690040 | S7  | DIAPH1      | 9.17E-12 | 0.000374383 | 1.48E-08 | 9.70E-09 | 0.394978  | 1.81E-05    |
| phe.Fasting_rs61267727 | S8 | NEK1 | rs192765219 | S7  | DIAPH1      | 9.17E-12 | 0.000374383 | 1.48E-08 | 9.70E-09 | 0.394978  | 1.81E-05    |
| phe.Fasting_rs61267727 | S8 | NEK1 | rs192770525 | S7  | DIAPH1      | 9.17E-12 | 0.000374383 | 1.48E-08 | 9.70E-09 | 0.394978  | 1.81E-05    |
| phe.Fasting_rs61267727 | S8 | NEK1 | rs2924507   | S5  | ZC3H3       | 3.60E-08 | 1           | 3.04E-05 | 6.78E-07 | 1         | 0.000791674 |
| phe.Fasting_rs61267727 | S8 | NEK1 | rs2924508   | S8  | ZC3H3       | 3.60E-08 | 1           | 3.04E-05 | 9.52E-07 | 1         | 0.00108069  |

|              |            |    |       |             |     |             |          |             |          |          |             |             |
|--------------|------------|----|-------|-------------|-----|-------------|----------|-------------|----------|----------|-------------|-------------|
| phe.Fasting_ | rs61267727 | S8 | NEK1  | rs2924511   | S7  | ZC3H3       | 3.60E-08 | 1           | 3.04E-05 | 5.76E-07 | 1           | 0.000680958 |
| phe.Fasting_ | rs61267727 | S8 | NEK1  | rs2924512   | S7  | ZC3H3       | 4.02E-08 | 1           | 3.37E-05 | 7.17E-07 | 1           | 0.00083355  |
| phe.Fasting_ | rs61267727 | S8 | NEK1  | rs2956376   | S8  | ZC3H3       | 3.60E-08 | 1           | 3.04E-05 | 3.89E-07 | 1           | 0.000476148 |
| phe.Fasting_ | rs61267727 | S8 | NEK1  | rs2980270   | S7  | ZC3H3       | 3.60E-08 | 1           | 3.04E-05 | 3.89E-07 | 1           | 0.000476148 |
| phe.Fasting_ | rs61267727 | S8 | NEK1  | rs2980272   | S7  | ZC3H3       | 4.02E-08 | 1           | 3.37E-05 | 7.52E-07 | 1           | 0.000869902 |
| phe.Fasting_ | rs61267727 | S8 | NEK1  | rs2980275   | S5  | ZC3H3       | 3.60E-08 | 1           | 3.04E-05 | 6.78E-07 | 1           | 0.000791674 |
| phe.Fasting_ | rs61267727 | S8 | NEK1  | rs35990401  | S7  | DIAPH1      | 8.40E-12 | 0.000343123 | 1.39E-08 | 3.62E-09 | 0.147164    | 7.50E-06    |
| phe.Fasting_ | rs61267727 | S8 | NEK1  | rs366767    | S5  | ZC3H3       | 6.34E-08 | 1           | 5.08E-05 | 4.19E-07 | 1           | 0.000508745 |
| phe.Fasting_ | rs61267727 | S8 | NEK1  | rs55900860  | S7  | DIAPH1      | 1.65E-12 | 6.74E-05    | 3.16E-09 | 1.25E-09 | 0.0510001   | 2.90E-06    |
| phe.Fasting_ | rs61267727 | S8 | NEK1  | rs57503635  | S3  | NA          | 7.93E-17 | 3.24E-09    | 3.50E-13 | 1.02E-05 | 1           | 0.00831784  |
| phe.Fasting_ | rs61267727 | S8 | NEK1  | rs6881310   | S23 | ISL1        | 4.23E-17 | 1.73E-09    | 2.22E-13 | 8.72E-13 | 3.55E-05    | 4.15E-09    |
| phe.Fasting_ | rs61267727 | S8 | NEK1  | rs73619637  | S8  | NA          | 1.02E-16 | 4.15E-09    | 4.31E-13 | 6.10E-09 | 0.248478    | 1.19E-05    |
| phe.Fasting_ | rs61267727 | S8 | NEK1  | rs73794928  | S13 | "PCDHGA9,Pi | 1.55E-05 | 1           | 6.66E-03 | 1.19E-05 | 1           | 0.0093559   |
| phe.Fasting_ | rs61267727 | S8 | NEK1  | rs77444916  | S23 | LOC642366   | 1.50E-17 | 6.11E-10    | 1.18E-13 | 3.78E-16 | 1.54E-08    | 1.16E-11    |
| phe.Fasting_ | rs61267727 | S8 | NEK1  | rs78703708  | S7  | FAF2        | 9.25E-18 | 3.78E-10    | 9.24E-14 | 7.48E-08 | 1           | 0.000109374 |
| phe.Fasting_ | rs61267727 | S8 | NEK1  | rs79517926  | S15 | "DIAPH1,LOC | 2.69E-12 | 0.000109672 | 4.97E-09 | 8.36E-10 | 0.0340091   | 2.03E-06    |
| phe.Fasting_ | rs61267727 | S8 | NEK1  | rs80258830  | S24 | LOC642366   | 1.50E-17 | 6.11E-10    | 1.18E-13 | 3.78E-16 | 1.54E-08    | 1.16E-11    |
| phe.Fasting_ | rs61411401 | S8 | COPG2 | rs116079984 | S8  | KPNA3       | 5.27E-06 | 1           | 2.61E-03 | 6.70E-10 | 0.0272805   | 1.68E-06    |
| phe.Fasting_ | rs61411401 | S8 | COPG2 | rs74627895  | S8  | TMEM64      | 1.77E-10 | 0.00722963  | 2.21E-07 | 8.70E-06 | 1           | 0.00728165  |
| phe.Fasting_ | rs61613048 | S8 | MYO1B | rs112027720 | S7  | DIAPH1      | 3.58E-07 | 1           | 2.44E-04 | 1.35E-11 | 0.000550149 | 4.91E-08    |
| phe.Fasting_ | rs61613048 | S8 | MYO1B | rs113219478 | S7  | DIAPH1      | 3.58E-07 | 1           | 2.44E-04 | 1.35E-11 | 0.000550149 | 4.91E-08    |
| phe.Fasting_ | rs61613048 | S8 | MYO1B | rs113357907 | S24 | ISL1        | 1.17E-16 | 4.79E-09    | 4.85E-13 | 9.36E-15 | 3.81E-07    | 8.15E-11    |
| phe.Fasting_ | rs61613048 | S8 | MYO1B | rs114565620 | S8  | RCL1        | 1.24E-16 | 5.06E-09    | 5.04E-13 | 7.57E-06 | 1           | 0.0064679   |
| phe.Fasting_ | rs61613048 | S8 | MYO1B | rs115787552 | S5  | KPNA3       | 4.21E-15 | 1.72E-07    | 1.11E-11 | 3.17E-06 | 1           | 0.0030676   |
| phe.Fasting_ | rs61613048 | S8 | MYO1B | rs115888477 | S8  | NA          | 2.75E-14 | 1.12E-06    | 6.69E-11 | 7.64E-07 | 1           | 0.000882713 |
| phe.Fasting_ | rs61613048 | S8 | MYO1B | rs116011837 | S9  | BRD2        | 5.55E-11 | 0.0022652   | 7.47E-08 | 3.51E-09 | 0.14269     | 7.30E-06    |
| phe.Fasting_ | rs61613048 | S8 | MYO1B | rs116079984 | S8  | KPNA3       | 4.21E-15 | 1.72E-07    | 1.11E-11 | 3.98E-06 | 1           | 0.00375092  |
| phe.Fasting_ | rs61613048 | S8 | MYO1B | rs116120727 | S9  | BRD2        | 5.55E-11 | 0.0022652   | 7.47E-08 | 3.51E-09 | 0.14269     | 7.30E-06    |
| phe.Fasting_ | rs61613048 | S8 | MYO1B | rs116279995 | S20 | "PCDHGA4,Pi | 8.36E-08 | 1           | 6.50E-05 | 6.34E-12 | 0.000258233 | 2.45E-08    |
| phe.Fasting_ | rs61613048 | S8 | MYO1B | rs12488988  | S6  | PHC3        | 9.58E-07 | 1           | 5.83E-04 | 2.09E-09 | 0.0849616   | 4.60E-06    |
| phe.Fasting_ | rs61613048 | S8 | MYO1B | rs12492606  | S8  | PHC3        | 9.58E-07 | 1           | 5.83E-04 | 2.04E-09 | 0.0831784   | 4.50E-06    |
| phe.Fasting_ | rs61613048 | S8 | MYO1B | rs13400525  | S8  | MFF         | 1.94E-15 | 7.94E-08    | 5.54E-12 | 1.22E-10 | 0.00498048  | 3.70E-07    |
| phe.Fasting_ | rs61613048 | S8 | MYO1B | rs138090701 | S5  | HDAC3       | 7.15E-08 | 1           | 5.64E-05 | 1.41E-11 | 0.000574561 | 5.10E-08    |
| phe.Fasting_ | rs61613048 | S8 | MYO1B | rs138136869 | S7  | DIAPH1      | 1.22E-07 | 1           | 9.14E-05 | 3.42E-12 | 0.000139092 | 1.44E-08    |
| phe.Fasting_ | rs61613048 | S8 | MYO1B | rs138457103 | S10 | DIAPH1      | 2.50E-07 | 1           | 1.75E-04 | 1.44E-11 | 0.000585076 | 5.19E-08    |
| phe.Fasting_ | rs61613048 | S8 | MYO1B | rs138487229 | S11 | DIAPH1      | 3.58E-07 | 1           | 2.44E-04 | 1.35E-11 | 0.000550149 | 4.91E-08    |
| phe.Fasting_ | rs61613048 | S8 | MYO1B | rs138738950 | S8  | "PCDHGB2,Pi | 3.58E-07 | 1           | 2.44E-04 | 1.36E-11 | 0.000551621 | 4.92E-08    |
| phe.Fasting_ | rs61613048 | S8 | MYO1B | rs139297927 | S8  | DIAPH1      | 3.58E-07 | 1           | 2.44E-04 | 1.35E-11 | 0.000550149 | 4.91E-08    |
| phe.Fasting_ | rs61613048 | S8 | MYO1B | rs139337303 | S8  | DIAPH1      | 3.58E-07 | 1           | 2.44E-04 | 1.35E-11 | 0.000550149 | 4.91E-08    |
| phe.Fasting_ | rs61613048 | S8 | MYO1B | rs139403963 | S8  | DIAPH1      | 1.22E-07 | 1           | 9.14E-05 | 3.42E-12 | 0.000139092 | 1.44E-08    |

|              |            |    |       |                |             |          |          |             |          |             |            |
|--------------|------------|----|-------|----------------|-------------|----------|----------|-------------|----------|-------------|------------|
| phe.Fasting_ | rs61613048 | S8 | MYO1B | rs139621309S18 | "LOC1005056 | 3.58E-07 | 1        | 2.44E-04    | 1.35E-11 | 0.000550149 | 4.91E-08   |
| phe.Fasting_ | rs61613048 | S8 | MYO1B | rs139828110S8  | DIAPH1      | 1.22E-07 | 1        | 9.14E-05    | 3.42E-12 | 0.000139092 | 1.44E-08   |
| phe.Fasting_ | rs61613048 | S8 | MYO1B | rs140070363S8  | DIAPH1      | 3.58E-07 | 1        | 2.44E-04    | 1.35E-11 | 0.000550149 | 4.91E-08   |
| phe.Fasting_ | rs61613048 | S8 | MYO1B | rs140524622S7  | MRPL10      | 1.66E-16 | 6.79E-09 | 6.03E-13    | 2.28E-08 | 0.929199    | 3.82E-05   |
| phe.Fasting_ | rs61613048 | S8 | MYO1B | rs140644750S13 | DIAPH1      | 3.58E-07 | 1        | 0.000243963 | 1.35E-11 | 0.000550149 | 4.91E-08   |
| phe.Fasting_ | rs61613048 | S8 | MYO1B | rs141022544S8  | DIAPH1      | 3.58E-07 | 1        | 2.44E-04    | 1.35E-11 | 0.000550149 | 4.91E-08   |
| phe.Fasting_ | rs61613048 | S8 | MYO1B | rs141525984S5  | DIAPH1      | 3.58E-07 | 1        | 2.44E-04    | 1.35E-11 | 0.000550149 | 4.91E-08   |
| phe.Fasting_ | rs61613048 | S8 | MYO1B | rs141692339S3  | "PCDHGA6,Pi | 9.52E-08 | 1        | 7.30E-05    | 9.11E-12 | 0.000371009 | 3.41E-08   |
| phe.Fasting_ | rs61613048 | S8 | MYO1B | rs141926074S8  | ATE1        | 1.72E-17 | 7.03E-10 | 1.28E-13    | 8.15E-12 | 0.000331646 | 3.07E-08   |
| phe.Fasting_ | rs61613048 | S8 | MYO1B | rs142480565S8  | DIAPH1      | 3.58E-07 | 1        | 2.44E-04    | 1.35E-11 | 0.000550149 | 4.91E-08   |
| phe.Fasting_ | rs61613048 | S8 | MYO1B | rs142718558S7  | "DIAPH1,LOC | 3.58E-07 | 1        | 2.44E-04    | 1.35E-11 | 0.000550149 | 4.91E-08   |
| phe.Fasting_ | rs61613048 | S8 | MYO1B | rs142789100S8  | DIAPH1      | 1.22E-07 | 1        | 9.14E-05    | 3.42E-12 | 0.000139092 | 1.44E-08   |
| phe.Fasting_ | rs61613048 | S8 | MYO1B | rs142812798S7  | DIAPH1      | 1.22E-07 | 1        | 9.14E-05    | 3.42E-12 | 0.000139092 | 1.44E-08   |
| phe.Fasting_ | rs61613048 | S8 | MYO1B | rs143377827S13 | "DIAPH1,LOC | 1.05E-07 | 1        | 7.94E-05    | 2.57E-12 | 0.00010455  | 1.10E-08   |
| phe.Fasting_ | rs61613048 | S8 | MYO1B | rs143691978S11 | DIAPH1      | 1.22E-07 | 1        | 9.14E-05    | 3.64E-12 | 0.000148156 | 1.52E-08   |
| phe.Fasting_ | rs61613048 | S8 | MYO1B | rs144081334S11 | DIAPH1      | 1.22E-07 | 1        | 9.14E-05    | 3.64E-12 | 0.000148156 | 1.52E-08   |
| phe.Fasting_ | rs61613048 | S8 | MYO1B | rs144613910S8  | DIAPH1      | 3.58E-07 | 1        | 2.44E-04    | 1.35E-11 | 0.000550149 | 4.91E-08   |
| phe.Fasting_ | rs61613048 | S8 | MYO1B | rs145027704S11 | DIAPH1      | 1.22E-07 | 1        | 9.14E-05    | 3.64E-12 | 0.000148156 | 1.52E-08   |
| phe.Fasting_ | rs61613048 | S8 | MYO1B | rs146220673S7  | DIAPH1      | 3.58E-07 | 1        | 2.44E-04    | 1.35E-11 | 0.000550149 | 4.91E-08   |
| phe.Fasting_ | rs61613048 | S8 | MYO1B | rs146622060S13 | DIAPH1      | 1.22E-07 | 1        | 9.14E-05    | 3.64E-12 | 0.000148156 | 1.52E-08   |
| phe.Fasting_ | rs61613048 | S8 | MYO1B | rs146815317S5  | KPNA3       | 4.21E-15 | 1.72E-07 | 1.11E-11    | 3.17E-06 | 1           | 0.0030676  |
| phe.Fasting_ | rs61613048 | S8 | MYO1B | rs146878162S7  | DIAPH1      | 3.58E-07 | 1        | 2.44E-04    | 1.35E-11 | 0.000550149 | 4.91E-08   |
| phe.Fasting_ | rs61613048 | S8 | MYO1B | rs147314451S8  | DIAPH1      | 3.58E-07 | 1        | 2.44E-04    | 1.35E-11 | 0.000550149 | 4.91E-08   |
| phe.Fasting_ | rs61613048 | S8 | MYO1B | rs147417996S7  | DIAPH1      | 1.22E-07 | 1        | 9.14E-05    | 3.64E-12 | 0.000148156 | 1.52E-08   |
| phe.Fasting_ | rs61613048 | S8 | MYO1B | rs147506725S21 | "PCDHGA1,Pi | 8.36E-08 | 1        | 6.50E-05    | 6.34E-12 | 0.000258233 | 2.45E-08   |
| phe.Fasting_ | rs61613048 | S8 | MYO1B | rs147646948S7  | "LOC1005056 | 3.58E-07 | 1        | 2.44E-04    | 1.35E-11 | 0.000550149 | 4.91E-08   |
| phe.Fasting_ | rs61613048 | S8 | MYO1B | rs147677041S8  | DIAPH1      | 1.22E-07 | 1        | 9.14E-05    | 3.42E-12 | 0.000139092 | 1.44E-08   |
| phe.Fasting_ | rs61613048 | S8 | MYO1B | rs148116628S7  | DIAPH1      | 3.58E-07 | 1        | 2.44E-04    | 1.35E-11 | 0.000550149 | 4.91E-08   |
| phe.Fasting_ | rs61613048 | S8 | MYO1B | rs148423011S7  | DIAPH1      | 3.58E-07 | 1        | 2.44E-04    | 1.35E-11 | 0.000550149 | 4.91E-08   |
| phe.Fasting_ | rs61613048 | S8 | MYO1B | rs149019627S8  | DIAPH1      | 1.22E-07 | 1        | 9.14E-05    | 3.42E-12 | 0.000139092 | 1.44E-08   |
| phe.Fasting_ | rs61613048 | S8 | MYO1B | rs149075406S8  | DIAPH1      | 3.58E-07 | 1        | 2.44E-04    | 1.35E-11 | 0.000550149 | 4.91E-08   |
| phe.Fasting_ | rs61613048 | S8 | MYO1B | rs149334783S8  | DIAPH1      | 3.58E-07 | 1        | 2.44E-04    | 1.35E-11 | 0.000550149 | 4.91E-08   |
| phe.Fasting_ | rs61613048 | S8 | MYO1B | rs149553852S21 | "PCDHGA10,  | 8.36E-08 | 1        | 6.50E-05    | 6.34E-12 | 0.000258233 | 2.45E-08   |
| phe.Fasting_ | rs61613048 | S8 | MYO1B | rs149716949S5  | DIAPH1      | 5.26E-08 | 1        | 4.28E-05    | 1.35E-12 | 5.50E-05    | 6.11E-09   |
| phe.Fasting_ | rs61613048 | S8 | MYO1B | rs149791570S5  | DIAPH1      | 1.22E-07 | 1        | 9.14E-05    | 3.42E-12 | 0.000139092 | 1.44E-08   |
| phe.Fasting_ | rs61613048 | S8 | MYO1B | rs150117838S8  | KPNA3       | 4.21E-15 | 1.72E-07 | 1.11E-11    | 3.16E-06 | 1           | 0.00306287 |
| phe.Fasting_ | rs61613048 | S8 | MYO1B | rs150452206S13 | "DIAPH1,LOC | 3.58E-07 | 1        | 2.44E-04    | 1.35E-11 | 0.000550149 | 4.91E-08   |
| phe.Fasting_ | rs61613048 | S8 | MYO1B | rs150675915S7  | DIAPH1      | 3.58E-07 | 1        | 0.000243963 | 1.35E-11 | 0.000550149 | 4.91E-08   |
| phe.Fasting_ | rs61613048 | S8 | MYO1B | rs150765570S7  | DIAPH1      | 3.58E-07 | 1        | 2.44E-04    | 1.35E-11 | 0.000550149 | 4.91E-08   |
| phe.Fasting_ | rs61613048 | S8 | MYO1B | rs150992994S11 | "PCDHGA5,Pi | 3.74E-07 | 1        | 2.54E-04    | 1.29E-11 | 0.00052564  | 4.72E-08   |

|              |            |    |       |             |     |             |          |          |             |          |             |             |
|--------------|------------|----|-------|-------------|-----|-------------|----------|----------|-------------|----------|-------------|-------------|
| phe.Fasting_ | rs61613048 | S8 | MYO1B | rs151204700 | S8  | DIAPH1      | 3.58E-07 | 1        | 2.44E-04    | 1.35E-11 | 0.000550149 | 4.91E-08    |
| phe.Fasting_ | rs61613048 | S8 | MYO1B | rs151330468 | S8  | DIAPH1      | 1.22E-07 | 1        | 9.14E-05    | 3.64E-12 | 0.000148156 | 1.52E-08    |
| phe.Fasting_ | rs61613048 | S8 | MYO1B | rs16854875  | S2  | NA          | 7.58E-07 | 1        | 4.74E-04    | 6.43E-07 | 1           | 0.000754821 |
| phe.Fasting_ | rs61613048 | S8 | MYO1B | rs17236830  | S6  | PHC3        | 1.57E-06 | 1        | 9.09E-04    | 2.59E-09 | 0.105377    | 5.56E-06    |
| phe.Fasting_ | rs61613048 | S8 | MYO1B | rs180772028 | S8  | "DIAPH1,LOC | 3.58E-07 | 1        | 2.44E-04    | 1.35E-11 | 0.000550149 | 4.91E-08    |
| phe.Fasting_ | rs61613048 | S8 | MYO1B | rs181224861 | S7  | DIAPH1      | 3.58E-07 | 1        | 0.000243963 | 1.35E-11 | 0.000550149 | 4.91E-08    |
| phe.Fasting_ | rs61613048 | S8 | MYO1B | rs181247960 | S21 | "PCDHGA9,PI | 8.36E-08 | 1        | 6.50E-05    | 6.34E-12 | 0.000258233 | 2.45E-08    |
| phe.Fasting_ | rs61613048 | S8 | MYO1B | rs181824655 | S21 | "PCDHGB6,PI | 8.36E-08 | 1        | 6.50E-05    | 6.34E-12 | 0.000258233 | 2.45E-08    |
| phe.Fasting_ | rs61613048 | S8 | MYO1B | rs182714699 | S8  | DIAPH1      | 3.58E-07 | 1        | 2.44E-04    | 1.35E-11 | 0.000550149 | 4.91E-08    |
| phe.Fasting_ | rs61613048 | S8 | MYO1B | rs182958142 | S8  | DIAPH1      | 5.79E-07 | 1        | 3.75E-04    | 1.39E-12 | 5.67E-05    | 6.29E-09    |
| phe.Fasting_ | rs61613048 | S8 | MYO1B | rs182965141 | S8  | DIAPH1      | 1.33E-07 | 1        | 9.84E-05    | 1.01E-09 | 0.0412817   | 2.41E-06    |
| phe.Fasting_ | rs61613048 | S8 | MYO1B | rs183597049 | S7  | DIAPH1      | 3.58E-07 | 1        | 2.44E-04    | 1.35E-11 | 0.000550149 | 4.91E-08    |
| phe.Fasting_ | rs61613048 | S8 | MYO1B | rs183980988 | S2  | NA          | 3.58E-07 | 1        | 2.44E-04    | 1.35E-11 | 0.000550149 | 4.91E-08    |
| phe.Fasting_ | rs61613048 | S8 | MYO1B | rs184233232 | S7  | DIAPH1      | 3.58E-07 | 1        | 2.44E-04    | 1.35E-11 | 0.000550149 | 4.91E-08    |
| phe.Fasting_ | rs61613048 | S8 | MYO1B | rs184509477 | S13 | "PCDHGB4,PI | 3.58E-07 | 1        | 2.44E-04    | 1.35E-11 | 0.000550149 | 4.91E-08    |
| phe.Fasting_ | rs61613048 | S8 | MYO1B | rs185069296 | S15 | "LOC1005056 | 3.58E-07 | 1        | 2.44E-04    | 1.35E-11 | 0.000550149 | 4.91E-08    |
| phe.Fasting_ | rs61613048 | S8 | MYO1B | rs185502834 | S8  | DIAPH1      | 1.22E-07 | 1        | 9.14E-05    | 3.42E-12 | 0.000139092 | 1.44E-08    |
| phe.Fasting_ | rs61613048 | S8 | MYO1B | rs185759881 | S7  | DIAPH1      | 3.58E-07 | 1        | 2.44E-04    | 1.35E-11 | 0.000550149 | 4.91E-08    |
| phe.Fasting_ | rs61613048 | S8 | MYO1B | rs186288044 | S21 | "PCDHGB4,PI | 8.36E-08 | 1        | 6.50E-05    | 6.34E-12 | 0.000258233 | 2.45E-08    |
| phe.Fasting_ | rs61613048 | S8 | MYO1B | rs187000011 | S11 | DIAPH1      | 3.58E-07 | 1        | 2.44E-04    | 1.35E-11 | 0.000550149 | 4.91E-08    |
| phe.Fasting_ | rs61613048 | S8 | MYO1B | rs188981295 | S5  | "RP527AP10, | 3.58E-07 | 1        | 2.44E-04    | 1.35E-11 | 0.000550149 | 4.91E-08    |
| phe.Fasting_ | rs61613048 | S8 | MYO1B | rs190559574 | S7  | DIAPH1      | 1.22E-07 | 1        | 9.14E-05    | 3.42E-12 | 0.000139092 | 1.44E-08    |
| phe.Fasting_ | rs61613048 | S8 | MYO1B | rs191544043 | S8  | DIAPH1      | 3.58E-07 | 1        | 2.44E-04    | 1.35E-11 | 0.000550149 | 4.91E-08    |
| phe.Fasting_ | rs61613048 | S8 | MYO1B | rs191766712 | S7  | DIAPH1      | 3.58E-07 | 1        | 2.44E-04    | 1.35E-11 | 0.000550149 | 4.91E-08    |
| phe.Fasting_ | rs61613048 | S8 | MYO1B | rs192690040 | S7  | DIAPH1      | 3.58E-07 | 1        | 2.44E-04    | 1.35E-11 | 0.000550149 | 4.91E-08    |
| phe.Fasting_ | rs61613048 | S8 | MYO1B | rs192765219 | S7  | DIAPH1      | 3.58E-07 | 1        | 2.44E-04    | 1.35E-11 | 0.000550149 | 4.91E-08    |
| phe.Fasting_ | rs61613048 | S8 | MYO1B | rs192770525 | S7  | DIAPH1      | 3.58E-07 | 1        | 2.44E-04    | 1.35E-11 | 0.000550149 | 4.91E-08    |
| phe.Fasting_ | rs61613048 | S8 | MYO1B | rs2241292   | S8  | GPR160      | 9.83E-07 | 1        | 0.000596834 | 3.14E-09 | 0.12767     | 6.60E-06    |
| phe.Fasting_ | rs61613048 | S8 | MYO1B | rs35990401  | S7  | DIAPH1      | 3.86E-07 | 1        | 0.000261363 | 4.56E-12 | 0.000185691 | 1.82E-08    |
| phe.Fasting_ | rs61613048 | S8 | MYO1B | rs3772186   | S6  | PHC3        | 9.58E-07 | 1        | 0.000583256 | 2.04E-09 | 0.0831784   | 4.50E-06    |
| phe.Fasting_ | rs61613048 | S8 | MYO1B | rs55900860  | S7  | DIAPH1      | 1.22E-07 | 1        | 9.14E-05    | 3.42E-12 | 0.000139092 | 1.44E-08    |
| phe.Fasting_ | rs61613048 | S8 | MYO1B | rs57287019  | S5  | CLCN3       | 7.47E-13 | 3.05E-05 | 1.55E-09    | 9.83E-06 | 1           | 0.00803313  |
| phe.Fasting_ | rs61613048 | S8 | MYO1B | rs57503635  | S3  | NA          | 1.02E-15 | 4.17E-08 | 3.03E-12    | 1.67E-06 | 1           | 0.00176352  |
| phe.Fasting_ | rs61613048 | S8 | MYO1B | rs58417766  | S7  | PHC3        | 9.58E-07 | 1        | 5.83E-04    | 2.04E-09 | 0.0831784   | 4.50E-06    |
| phe.Fasting_ | rs61613048 | S8 | MYO1B | rs6763396   | S5  | PHC3        | 1.01E-06 | 1        | 0.000609926 | 2.10E-09 | 0.0852872   | 4.61E-06    |
| phe.Fasting_ | rs61613048 | S8 | MYO1B | rs6781454   | S8  | PHC3        | 9.76E-07 | 1        | 0.000593612 | 2.08E-09 | 0.0846771   | 4.58E-06    |
| phe.Fasting_ | rs61613048 | S8 | MYO1B | rs6786022   | S8  | PHC3        | 1.51E-06 | 1        | 0.000877462 | 2.52E-09 | 0.102397    | 5.42E-06    |
| phe.Fasting_ | rs61613048 | S8 | MYO1B | rs6808506   | S7  | PHC3        | 9.58E-07 | 1        | 0.000583256 | 2.04E-09 | 0.0831784   | 4.50E-06    |
| phe.Fasting_ | rs61613048 | S8 | MYO1B | rs6881310   | S23 | ISL1        | 7.38E-16 | 3.01E-08 | 2.25E-12    | 3.70E-12 | 0.000150673 | 1.54E-08    |
| phe.Fasting_ | rs61613048 | S8 | MYO1B | rs7256517   | S7  | CYTH2       | 2.20E-05 | 1        | 9.06E-03    | 2.79E-06 | 1           | 0.00274875  |

|                        |    |       |             |     |             |          |            |             |          |             |            |
|------------------------|----|-------|-------------|-----|-------------|----------|------------|-------------|----------|-------------|------------|
| phe.Fasting_rs61613048 | S8 | MYO1B | rs73619637  | S8  | NA          | 1.26E-15 | 5.15E-08   | 3.67E-12    | 1.42E-15 | 5.78E-08    | 1.60E-11   |
| phe.Fasting_rs61613048 | S8 | MYO1B | rs73879173  | S8  | PHC3        | 9.58E-07 | 1          | 5.83E-04    | 2.04E-09 | 0.0831784   | 4.50E-06   |
| phe.Fasting_rs61613048 | S8 | MYO1B | rs73879178  | S10 | PHC3        | 1.51E-06 | 1          | 0.000877462 | 2.52E-09 | 0.102397    | 5.42E-06   |
| phe.Fasting_rs61613048 | S8 | MYO1B | rs73879182  | S6  | PHC3        | 9.58E-07 | 1          | 0.000583256 | 2.04E-09 | 0.0831784   | 4.50E-06   |
| phe.Fasting_rs61613048 | S8 | MYO1B | rs75350765  | S5  | RCL1        | 1.24E-16 | 5.06E-09   | 5.04E-13    | 7.57E-06 | 1           | 0.0064679  |
| phe.Fasting_rs61613048 | S8 | MYO1B | rs75506779  | S5  | TMCO3       | 3.76E-11 | 0.00153489 | 5.21E-08    | 1.21E-05 | 1           | 0.00951745 |
| phe.Fasting_rs61613048 | S8 | MYO1B | rs75758702  | S24 | NA          | 1.04E-16 | 4.26E-09   | 4.42E-13    | 7.87E-12 | 0.000320329 | 2.98E-08   |
| phe.Fasting_rs61613048 | S8 | MYO1B | rs76146702  | S5  | PHC3        | 1.02E-06 | 1          | 0.000619275 | 1.13E-09 | 0.0461028   | 2.66E-06   |
| phe.Fasting_rs61613048 | S8 | MYO1B | rs7615039   | S8  | PHC3        | 8.72E-07 | 1          | 0.000535522 | 3.11E-09 | 0.12663     | 6.59E-06   |
| phe.Fasting_rs61613048 | S8 | MYO1B | rs7638400   | S7  | PHC3        | 9.58E-07 | 1          | 0.000583256 | 2.04E-09 | 0.0831784   | 4.50E-06   |
| phe.Fasting_rs61613048 | S8 | MYO1B | rs76737663  | S1  | LOC654841   | 2.11E-15 | 8.60E-08   | 5.97E-12    | 1.34E-09 | 0.054704    | 3.08E-06   |
| phe.Fasting_rs61613048 | S8 | MYO1B | rs77444916  | S23 | LOC642366   | 2.55E-16 | 1.04E-08   | 8.62E-13    | 8.90E-15 | 3.62E-07    | 7.81E-11   |
| phe.Fasting_rs61613048 | S8 | MYO1B | rs77798597  | S7  | KPNA3       | 4.21E-15 | 1.72E-07   | 1.11E-11    | 3.16E-06 | 1           | 0.00306287 |
| phe.Fasting_rs61613048 | S8 | MYO1B | rs78516788  | S8  | SLC38A1     | 7.65E-06 | 1          | 3.62E-03    | 1.09E-15 | 4.44E-08    | 1.25E-11   |
| phe.Fasting_rs61613048 | S8 | MYO1B | rs78736524  | S5  | KPNA3       | 4.21E-15 | 1.72E-07   | 1.11E-11    | 3.17E-06 | 1           | 0.0030676  |
| phe.Fasting_rs61613048 | S8 | MYO1B | rs79389383  | S8  | PHC3        | 9.76E-07 | 1          | 0.000593612 | 2.08E-09 | 0.0846771   | 4.58E-06   |
| phe.Fasting_rs61613048 | S8 | MYO1B | rs79517926  | S15 | "DIAPH1,LOC | 1.65E-07 | 1          | 1.19E-04    | 1.56E-12 | 6.36E-05    | 6.98E-09   |
| phe.Fasting_rs61613048 | S8 | MYO1B | rs79518241  | S6  | PHC3        | 9.58E-07 | 1          | 0.000583256 | 2.04E-09 | 0.0831784   | 4.50E-06   |
| phe.Fasting_rs61613048 | S8 | MYO1B | rs79781495  | S8  | KPNA3       | 4.21E-15 | 1.72E-07   | 1.11E-11    | 3.16E-06 | 1           | 0.00306287 |
| phe.Fasting_rs61613048 | S8 | MYO1B | rs80258830  | S24 | LOC642366   | 2.55E-16 | 1.04E-08   | 8.62E-13    | 8.90E-15 | 3.62E-07    | 7.81E-11   |
| phe.Fasting_rs61613048 | S8 | MYO1B | rs80332465  | S5  | KPNA3       | 4.43E-15 | 1.81E-07   | 1.17E-11    | 3.28E-06 | 1           | 0.00316472 |
| phe.Fasting_rs61613048 | S8 | MYO1B | rs80334773  | S5  | KPNA3       | 4.43E-15 | 1.81E-07   | 1.17E-11    | 3.28E-06 | 1           | 0.00316472 |
| phe.Fasting_rs61782922 | S7 | UBE4B | rs112348319 | S8  | SPTLC1      | 3.17E-06 | 1          | 0.00165984  | 1.11E-06 | 1           | 0.00124302 |
| phe.Fasting_rs61782922 | S7 | UBE4B | rs112608164 | S8  | SPTLC1      | 3.17E-06 | 1          | 0.00165984  | 1.11E-06 | 1           | 0.00124302 |
| phe.Fasting_rs61782922 | S7 | UBE4B | rs113568654 | S12 | SPTLC1      | 3.72E-06 | 1          | 1.92E-03    | 1.06E-05 | 1           | 0.00856035 |
| phe.Fasting_rs61782922 | S7 | UBE4B | rs138090701 | S5  | HDAC3       | 1.34E-05 | 1          | 0.00589544  | 1.43E-06 | 1           | 0.00155197 |
| phe.Fasting_rs61782922 | S7 | UBE4B | rs138136869 | S7  | DIAPH1      | 1.84E-05 | 1          | 0.0077584   | 7.49E-10 | 0.0304703   | 1.85E-06   |
| phe.Fasting_rs61782922 | S7 | UBE4B | rs139403963 | S8  | DIAPH1      | 1.84E-05 | 1          | 7.76E-03    | 7.49E-10 | 0.0304703   | 1.85E-06   |
| phe.Fasting_rs61782922 | S7 | UBE4B | rs139828110 | S8  | DIAPH1      | 1.84E-05 | 1          | 0.0077584   | 7.49E-10 | 0.0304703   | 1.85E-06   |
| phe.Fasting_rs61782922 | S7 | UBE4B | rs140524622 | S7  | MRPL10      | 1.26E-09 | 0.0513677  | 1.36E-06    | 2.58E-06 | 1           | 0.00256627 |
| phe.Fasting_rs61782922 | S7 | UBE4B | rs142789100 | S8  | DIAPH1      | 1.84E-05 | 1          | 0.0077584   | 7.49E-10 | 0.0304703   | 1.85E-06   |
| phe.Fasting_rs61782922 | S7 | UBE4B | rs142812798 | S7  | DIAPH1      | 1.84E-05 | 1          | 7.76E-03    | 7.49E-10 | 0.0304703   | 1.85E-06   |
| phe.Fasting_rs61782922 | S7 | UBE4B | rs143377827 | S13 | "DIAPH1,LOC | 1.89E-05 | 1          | 7.94E-03    | 5.55E-10 | 0.0225938   | 1.43E-06   |
| phe.Fasting_rs61782922 | S7 | UBE4B | rs143691978 | S11 | DIAPH1      | 1.84E-05 | 1          | 0.0077584   | 1.18E-09 | 0.0481149   | 2.77E-06   |
| phe.Fasting_rs61782922 | S7 | UBE4B | rs144081334 | S11 | DIAPH1      | 1.84E-05 | 1          | 0.0077584   | 1.18E-09 | 0.0481149   | 2.77E-06   |
| phe.Fasting_rs61782922 | S7 | UBE4B | rs145027704 | S11 | DIAPH1      | 1.84E-05 | 1          | 0.0077584   | 1.18E-09 | 0.0481149   | 2.77E-06   |
| phe.Fasting_rs61782922 | S7 | UBE4B | rs146622060 | S13 | DIAPH1      | 1.84E-05 | 1          | 0.0077584   | 1.18E-09 | 0.0481149   | 2.77E-06   |
| phe.Fasting_rs61782922 | S7 | UBE4B | rs147417996 | S7  | DIAPH1      | 1.84E-05 | 1          | 0.0077584   | 1.18E-09 | 0.0481149   | 2.77E-06   |
| phe.Fasting_rs61782922 | S7 | UBE4B | rs147677041 | S8  | DIAPH1      | 1.84E-05 | 1          | 7.76E-03    | 7.49E-10 | 0.0304703   | 1.85E-06   |
| phe.Fasting_rs61782922 | S7 | UBE4B | rs149019627 | S8  | DIAPH1      | 1.84E-05 | 1          | 0.0077584   | 7.49E-10 | 0.0304703   | 1.85E-06   |

|                        |    |       |             |     |             |          |           |             |          |             |            |
|------------------------|----|-------|-------------|-----|-------------|----------|-----------|-------------|----------|-------------|------------|
| phe.Fasting_rs61782922 | S7 | UBE4B | rs149716949 | S5  | DIAPH1      | 1.07E-05 | 1         | 0.00486013  | 1.18E-06 | 1           | 0.00130848 |
| phe.Fasting_rs61782922 | S7 | UBE4B | rs149791570 | S5  | DIAPH1      | 1.84E-05 | 1         | 0.0077584   | 7.49E-10 | 0.0304703   | 1.85E-06   |
| phe.Fasting_rs61782922 | S7 | UBE4B | rs151330468 | S8  | DIAPH1      | 1.84E-05 | 1         | 0.0077584   | 1.18E-09 | 0.0481149   | 2.77E-06   |
| phe.Fasting_rs61782922 | S7 | UBE4B | rs182965141 | S8  | DIAPH1      | 1.94E-05 | 1         | 0.00813416  | 2.41E-08 | 0.979184    | 3.98E-05   |
| phe.Fasting_rs61782922 | S7 | UBE4B | rs185502834 | S8  | DIAPH1      | 1.84E-05 | 1         | 0.0077584   | 7.49E-10 | 0.0304703   | 1.85E-06   |
| phe.Fasting_rs61782922 | S7 | UBE4B | rs190559574 | S7  | DIAPH1      | 1.84E-05 | 1         | 7.76E-03    | 7.49E-10 | 0.0304703   | 1.85E-06   |
| phe.Fasting_rs61782922 | S7 | UBE4B | rs55900860  | S7  | DIAPH1      | 1.84E-05 | 1         | 0.0077584   | 7.49E-10 | 0.0304703   | 1.85E-06   |
| phe.Fasting_rs61782922 | S7 | UBE4B | rs6881310   | S23 | ISL1        | 3.36E-07 | 1         | 0.000230266 | 1.04E-05 | 1           | 0.00847197 |
| phe.Fasting_rs61782922 | S7 | UBE4B | rs76542405  | S5  | SPTLC1      | 3.17E-06 | 1         | 0.00165984  | 1.11E-06 | 1           | 0.00124302 |
| phe.Fasting_rs61782922 | S7 | UBE4B | rs77444916  | S23 | LOC642366   | 5.33E-07 | 1         | 0.000347945 | 4.83E-12 | 0.000196478 | 1.91E-08   |
| phe.Fasting_rs61782922 | S7 | UBE4B | rs77523818  | S7  | SPTLC1      | 3.17E-06 | 1         | 0.00165984  | 1.11E-06 | 1           | 0.00124302 |
| phe.Fasting_rs61782922 | S7 | UBE4B | rs77845645  | S21 | NA          | 6.21E-07 | 1         | 3.98E-04    | 7.52E-09 | 0.306187    | 1.44E-05   |
| phe.Fasting_rs61782922 | S7 | UBE4B | rs80258830  | S24 | LOC642366   | 5.33E-07 | 1         | 0.000347945 | 4.83E-12 | 0.000196478 | 1.91E-08   |
| phe.Fasting_rs61782923 | S7 | UBE4B | rs112348319 | S8  | SPTLC1      | 3.17E-06 | 1         | 0.00165984  | 1.11E-06 | 1           | 0.00124302 |
| phe.Fasting_rs61782923 | S7 | UBE4B | rs112608164 | S8  | SPTLC1      | 3.17E-06 | 1         | 0.00165984  | 1.11E-06 | 1           | 0.00124302 |
| phe.Fasting_rs61782923 | S7 | UBE4B | rs113568654 | S12 | SPTLC1      | 3.72E-06 | 1         | 0.00191746  | 1.06E-05 | 1           | 0.00856035 |
| phe.Fasting_rs61782923 | S7 | UBE4B | rs138090701 | S5  | HDAC3       | 1.34E-05 | 1         | 5.90E-03    | 1.43E-06 | 1           | 0.00155197 |
| phe.Fasting_rs61782923 | S7 | UBE4B | rs138136869 | S7  | DIAPH1      | 1.84E-05 | 1         | 0.0077584   | 7.49E-10 | 0.0304703   | 1.85E-06   |
| phe.Fasting_rs61782923 | S7 | UBE4B | rs139403963 | S8  | DIAPH1      | 1.84E-05 | 1         | 0.0077584   | 7.49E-10 | 0.0304703   | 1.85E-06   |
| phe.Fasting_rs61782923 | S7 | UBE4B | rs139828110 | S8  | DIAPH1      | 1.84E-05 | 1         | 0.0077584   | 7.49E-10 | 0.0304703   | 1.85E-06   |
| phe.Fasting_rs61782923 | S7 | UBE4B | rs140524622 | S7  | MRPL10      | 1.26E-09 | 0.0513677 | 1.36E-06    | 2.58E-06 | 1           | 0.00256627 |
| phe.Fasting_rs61782923 | S7 | UBE4B | rs142789100 | S8  | DIAPH1      | 1.84E-05 | 1         | 0.0077584   | 7.49E-10 | 0.0304703   | 1.85E-06   |
| phe.Fasting_rs61782923 | S7 | UBE4B | rs142812798 | S7  | DIAPH1      | 1.84E-05 | 1         | 0.0077584   | 7.49E-10 | 0.0304703   | 1.85E-06   |
| phe.Fasting_rs61782923 | S7 | UBE4B | rs143377827 | S13 | "DIAPH1,LOC | 1.89E-05 | 1         | 0.0079447   | 5.55E-10 | 0.0225938   | 1.43E-06   |
| phe.Fasting_rs61782923 | S7 | UBE4B | rs143691978 | S11 | DIAPH1      | 1.84E-05 | 1         | 7.76E-03    | 1.18E-09 | 0.0481149   | 2.77E-06   |
| phe.Fasting_rs61782923 | S7 | UBE4B | rs144081334 | S11 | DIAPH1      | 1.84E-05 | 1         | 7.76E-03    | 1.18E-09 | 0.0481149   | 2.77E-06   |
| phe.Fasting_rs61782923 | S7 | UBE4B | rs145027704 | S11 | DIAPH1      | 1.84E-05 | 1         | 0.0077584   | 1.18E-09 | 0.0481149   | 2.77E-06   |
| phe.Fasting_rs61782923 | S7 | UBE4B | rs146622060 | S13 | DIAPH1      | 1.84E-05 | 1         | 0.0077584   | 1.18E-09 | 0.0481149   | 2.77E-06   |
| phe.Fasting_rs61782923 | S7 | UBE4B | rs147417996 | S7  | DIAPH1      | 1.84E-05 | 1         | 0.0077584   | 1.18E-09 | 0.0481149   | 2.77E-06   |
| phe.Fasting_rs61782923 | S7 | UBE4B | rs147677041 | S8  | DIAPH1      | 1.84E-05 | 1         | 0.0077584   | 7.49E-10 | 0.0304703   | 1.85E-06   |
| phe.Fasting_rs61782923 | S7 | UBE4B | rs149019627 | S8  | DIAPH1      | 1.84E-05 | 1         | 0.0077584   | 7.49E-10 | 0.0304703   | 1.85E-06   |
| phe.Fasting_rs61782923 | S7 | UBE4B | rs149716949 | S5  | DIAPH1      | 1.07E-05 | 1         | 0.00486013  | 1.18E-06 | 1           | 0.00130848 |
| phe.Fasting_rs61782923 | S7 | UBE4B | rs149791570 | S5  | DIAPH1      | 1.84E-05 | 1         | 0.0077584   | 7.49E-10 | 0.0304703   | 1.85E-06   |
| phe.Fasting_rs61782923 | S7 | UBE4B | rs151330468 | S8  | DIAPH1      | 1.84E-05 | 1         | 7.76E-03    | 1.18E-09 | 0.0481149   | 2.77E-06   |
| phe.Fasting_rs61782923 | S7 | UBE4B | rs182965141 | S8  | DIAPH1      | 1.94E-05 | 1         | 8.13E-03    | 2.41E-08 | 0.979184    | 3.98E-05   |
| phe.Fasting_rs61782923 | S7 | UBE4B | rs185502834 | S8  | DIAPH1      | 1.84E-05 | 1         | 7.76E-03    | 7.49E-10 | 0.0304703   | 1.85E-06   |
| phe.Fasting_rs61782923 | S7 | UBE4B | rs190559574 | S7  | DIAPH1      | 1.84E-05 | 1         | 7.76E-03    | 7.49E-10 | 0.0304703   | 1.85E-06   |
| phe.Fasting_rs61782923 | S7 | UBE4B | rs55900860  | S7  | DIAPH1      | 1.84E-05 | 1.00E+00  | 7.76E-03    | 7.49E-10 | 0.0304703   | 1.85E-06   |
| phe.Fasting_rs61782923 | S7 | UBE4B | rs6881310   | S23 | ISL1        | 3.36E-07 | 1         | 2.30E-04    | 1.04E-05 | 1           | 0.00847197 |
| phe.Fasting_rs61782923 | S7 | UBE4B | rs76542405  | S5  | SPTLC1      | 3.17E-06 | 1         | 0.00165984  | 1.11E-06 | 1           | 0.00124302 |

|                        |    |       |             |     |           |          |            |             |          |             |             |
|------------------------|----|-------|-------------|-----|-----------|----------|------------|-------------|----------|-------------|-------------|
| phe.Fasting_rs61782923 | S7 | UBE4B | rs77444916  | S23 | LOC642366 | 5.33E-07 | 1          | 3.48E-04    | 4.83E-12 | 0.000196478 | 1.91E-08    |
| phe.Fasting_rs61782923 | S7 | UBE4B | rs77523818  | S7  | SPTLC1    | 3.17E-06 | 1          | 0.00165984  | 1.11E-06 | 1           | 0.00124302  |
| phe.Fasting_rs61782923 | S7 | UBE4B | rs77845645  | S21 | NA        | 6.21E-07 | 1          | 0.000397881 | 7.52E-09 | 0.306187    | 1.44E-05    |
| phe.Fasting_rs61782923 | S7 | UBE4B | rs80258830  | S24 | LOC642366 | 5.33E-07 | 1.00E+00   | 3.48E-04    | 4.83E-12 | 0.000196478 | 1.91E-08    |
| phe.Fasting_rs61782925 | S8 | UBE4B | rs112348319 | S8  | SPTLC1    | 5.20E-06 | 1          | 2.58E-03    | 9.42E-07 | 1           | 0.00106969  |
| phe.Fasting_rs61782925 | S8 | UBE4B | rs112608164 | S8  | SPTLC1    | 5.20E-06 | 1          | 0.002579    | 9.42E-07 | 1           | 0.00106969  |
| phe.Fasting_rs61782925 | S8 | UBE4B | rs113568654 | S12 | SPTLC1    | 5.96E-06 | 1          | 0.0029059   | 9.02E-06 | 1           | 0.00749955  |
| phe.Fasting_rs61782925 | S8 | UBE4B | rs138090701 | S5  | HDAC3     | 1.92E-05 | 1          | 0.00804507  | 1.13E-06 | 1           | 0.0012632   |
| phe.Fasting_rs61782925 | S8 | UBE4B | rs140524622 | S7  | MRPL10    | 1.55E-09 | 0.0634081  | 1.65E-06    | 2.09E-06 | 1           | 0.00214646  |
| phe.Fasting_rs61782925 | S8 | UBE4B | rs149716949 | S5  | DIAPH1    | 1.56E-05 | 1          | 0.00671284  | 9.26E-07 | 1           | 1.05E-03    |
| phe.Fasting_rs61782925 | S8 | UBE4B | rs6881310   | S23 | ISL1      | 4.50E-07 | 1.00E+00   | 2.98E-04    | 9.06E-06 | 1           | 0.00753337  |
| phe.Fasting_rs61782925 | S8 | UBE4B | rs76542405  | S5  | SPTLC1    | 5.20E-06 | 1.00E+00   | 2.58E-03    | 9.42E-07 | 1           | 0.00106969  |
| phe.Fasting_rs61782925 | S8 | UBE4B | rs77444916  | S23 | LOC642366 | 6.09E-07 | 1.00E+00   | 3.91E-04    | 4.35E-12 | 0.000176871 | 1.74E-08    |
| phe.Fasting_rs61782925 | S8 | UBE4B | rs77523818  | S7  | SPTLC1    | 5.20E-06 | 1          | 0.002579    | 9.42E-07 | 1           | 0.00106969  |
| phe.Fasting_rs61782925 | S8 | UBE4B | rs77845645  | S21 | NA        | 9.77E-07 | 1.00E+00   | 5.94E-04    | 6.14E-09 | 0.249782    | 1.19E-05    |
| phe.Fasting_rs61782925 | S8 | UBE4B | rs80258830  | S24 | LOC642366 | 6.09E-07 | 1.00E+00   | 3.91E-04    | 4.35E-12 | 0.000176871 | 1.74E-08    |
| phe.Fasting_rs61782936 | S8 | UBE4B | rs112348319 | S8  | SPTLC1    | 5.51E-06 | 1.00E+00   | 2.71E-03    | 7.50E-07 | 1           | 0.00086844  |
| phe.Fasting_rs61782936 | S8 | UBE4B | rs112608164 | S8  | SPTLC1    | 5.51E-06 | 1.00E+00   | 2.71E-03    | 7.50E-07 | 1           | 0.00086844  |
| phe.Fasting_rs61782936 | S8 | UBE4B | rs113568654 | S12 | SPTLC1    | 6.28E-06 | 1.00E+00   | 3.04E-03    | 7.36E-06 | 1           | 0.00631083  |
| phe.Fasting_rs61782936 | S8 | UBE4B | rs138090701 | S5  | HDAC3     | 1.97E-05 | 1.00E+00   | 8.24E-03    | 9.40E-07 | 1           | 0.00106782  |
| phe.Fasting_rs61782936 | S8 | UBE4B | rs140524622 | S7  | MRPL10    | 1.53E-09 | 6.24E-02   | 1.63E-06    | 1.63E-06 | 1           | 0.00172657  |
| phe.Fasting_rs61782936 | S8 | UBE4B | rs149716949 | S5  | DIAPH1    | 1.60E-05 | 1          | 6.84E-03    | 7.58E-07 | 1           | 0.000876478 |
| phe.Fasting_rs61782936 | S8 | UBE4B | rs6881310   | S23 | ISL1      | 4.64E-07 | 1          | 3.06E-04    | 7.48E-06 | 1           | 0.00640069  |
| phe.Fasting_rs61782936 | S8 | UBE4B | rs76542405  | S5  | SPTLC1    | 5.51E-06 | 1          | 2.71E-03    | 7.50E-07 | 1           | 0.00086844  |
| phe.Fasting_rs61782936 | S8 | UBE4B | rs77444916  | S23 | LOC642366 | 6.20E-07 | 1          | 3.98E-04    | 3.66E-12 | 0.000149057 | 1.53E-08    |
| phe.Fasting_rs61782936 | S8 | UBE4B | rs77523818  | S7  | SPTLC1    | 5.51E-06 | 1          | 2.71E-03    | 7.50E-07 | 1           | 0.00086844  |
| phe.Fasting_rs61782936 | S8 | UBE4B | rs77845645  | S21 | NA        | 1.02E-06 | 1          | 0.000617042 | 4.62E-09 | 0.188128    | 9.26E-06    |
| phe.Fasting_rs61782936 | S8 | UBE4B | rs80258830  | S24 | LOC642366 | 6.20E-07 | 1.00E+00   | 3.98E-04    | 3.66E-12 | 0.000149057 | 1.53E-08    |
| phe.Fasting_rs62473526 | S8 | COPG2 | rs116079984 | S8  | KPNA3     | 5.27E-06 | 1          | 2.61E-03    | 9.76E-10 | 0.0397117   | 2.32E-06    |
| phe.Fasting_rs62473526 | S8 | COPG2 | rs74627895  | S8  | TMEM64    | 1.77E-10 | 0.00722963 | 2.21E-07    | 7.91E-06 | 1           | 0.00671312  |
| phe.Fasting_rs62473529 | S7 | COPG2 | rs116079984 | S8  | KPNA3     | 5.40E-06 | 1          | 2.66E-03    | 3.77E-08 | 1           | 5.94E-05    |
| phe.Fasting_rs62473529 | S7 | COPG2 | rs74627895  | S8  | TMEM64    | 1.57E-10 | 0.00641302 | 1.97E-07    | 8.10E-06 | 1           | 0.00685529  |
| phe.Fasting_rs62473530 | S7 | COPG2 | rs116079984 | S8  | KPNA3     | 5.40E-06 | 1.00E+00   | 2.66E-03    | 3.77E-08 | 1           | 5.94E-05    |
| phe.Fasting_rs62473530 | S7 | COPG2 | rs74627895  | S8  | TMEM64    | 1.57E-10 | 6.41E-03   | 1.97E-07    | 8.10E-06 | 1           | 0.00685529  |
| phe.Fasting_rs62473531 | S7 | COPG2 | rs116079984 | S8  | KPNA3     | 5.40E-06 | 1          | 0.0026598   | 3.77E-08 | 1           | 5.94E-05    |
| phe.Fasting_rs62473531 | S7 | COPG2 | rs74627895  | S8  | TMEM64    | 1.57E-10 | 6.41E-03   | 1.97E-07    | 8.10E-06 | 1           | 6.86E-03    |
| phe.Fasting_rs62473532 | S7 | COPG2 | rs116079984 | S8  | KPNA3     | 5.40E-06 | 1.00E+00   | 2.66E-03    | 3.77E-08 | 1           | 5.94E-05    |
| phe.Fasting_rs62473532 | S7 | COPG2 | rs74627895  | S8  | TMEM64    | 1.57E-10 | 6.41E-03   | 1.97E-07    | 8.10E-06 | 1           | 0.00685529  |
| phe.Fasting_rs6542772  | S5 | LIMS1 | rs112027720 | S7  | DIAPH1    | 2.35E-06 | 1.00E+00   | 1.28E-03    | 5.58E-06 | 1           | 0.00500881  |
| phe.Fasting_rs6542772  | S5 | LIMS1 | rs112940854 | S5  | MYO1B     | 1.92E-05 | 1.00E+00   | 8.04E-03    | 8.38E-07 | 1           | 0.00096107  |



|                       |    |       |                |             |          |          |             |          |   |            |
|-----------------------|----|-------|----------------|-------------|----------|----------|-------------|----------|---|------------|
| phe.Fasting_rs6542772 | S5 | LIMS1 | rs113219478S7  | DIAPH1      | 2.35E-06 | 1.00E+00 | 1.28E-03    | 5.58E-06 | 1 | 0.00500881 |
| phe.Fasting_rs6542772 | S5 | LIMS1 | rs115888477S8  | NA          | 6.44E-07 | 1        | 4.11E-04    | 5.89E-06 | 1 | 0.00523297 |
| phe.Fasting_rs6542772 | S5 | LIMS1 | rs138090701S5  | HDAC3       | 1.14E-06 | 1        | 0.000680781 | 7.54E-06 | 1 | 6.44E-03   |
| phe.Fasting_rs6542772 | S5 | LIMS1 | rs138136869S7  | DIAPH1      | 7.24E-07 | 1        | 0.000456268 | 2.51E-06 | 1 | 0.00250878 |
| phe.Fasting_rs6542772 | S5 | LIMS1 | rs138487229S11 | DIAPH1      | 2.35E-06 | 1        | 0.00128405  | 5.58E-06 | 1 | 5.01E-03   |
| phe.Fasting_rs6542772 | S5 | LIMS1 | rs138738950S8  | "PCDHGB2,PI | 2.35E-06 | 1        | 0.00128405  | 5.57E-06 | 1 | 5.01E-03   |
| phe.Fasting_rs6542772 | S5 | LIMS1 | rs139297927S8  | DIAPH1      | 2.35E-06 | 1        | 0.00128405  | 5.58E-06 | 1 | 0.00500881 |
| phe.Fasting_rs6542772 | S5 | LIMS1 | rs139337303S8  | DIAPH1      | 2.35E-06 | 1        | 0.00128405  | 5.58E-06 | 1 | 5.01E-03   |
| phe.Fasting_rs6542772 | S5 | LIMS1 | rs139403963S8  | DIAPH1      | 7.24E-07 | 1        | 0.000456268 | 2.51E-06 | 1 | 2.51E-03   |
| phe.Fasting_rs6542772 | S5 | LIMS1 | rs139621309S18 | "LOC1005056 | 2.35E-06 | 1        | 0.00128405  | 5.58E-06 | 1 | 5.01E-03   |
| phe.Fasting_rs6542772 | S5 | LIMS1 | rs139828110S8  | DIAPH1      | 7.24E-07 | 1        | 0.000456268 | 2.51E-06 | 1 | 2.51E-03   |
| phe.Fasting_rs6542772 | S5 | LIMS1 | rs140070363S8  | DIAPH1      | 2.35E-06 | 1        | 0.00128405  | 5.58E-06 | 1 | 5.01E-03   |
| phe.Fasting_rs6542772 | S5 | LIMS1 | rs140644750S13 | DIAPH1      | 2.35E-06 | 1        | 0.00128405  | 5.58E-06 | 1 | 0.00500881 |
| phe.Fasting_rs6542772 | S5 | LIMS1 | rs141022544S8  | DIAPH1      | 2.35E-06 | 1.00E+00 | 1.28E-03    | 5.58E-06 | 1 | 0.00500881 |
| phe.Fasting_rs6542772 | S5 | LIMS1 | rs141525984S5  | DIAPH1      | 2.35E-06 | 1.00E+00 | 1.28E-03    | 5.58E-06 | 1 | 0.00500881 |
| phe.Fasting_rs6542772 | S5 | LIMS1 | rs142480565S8  | DIAPH1      | 2.35E-06 | 1        | 1.28E-03    | 5.58E-06 | 1 | 0.00500881 |
| phe.Fasting_rs6542772 | S5 | LIMS1 | rs142718558S7  | "DIAPH1,LOC | 2.35E-06 | 1        | 1.28E-03    | 5.58E-06 | 1 | 0.00500881 |
| phe.Fasting_rs6542772 | S5 | LIMS1 | rs142789100S8  | DIAPH1      | 7.24E-07 | 1        | 4.56E-04    | 2.51E-06 | 1 | 0.00250878 |
| phe.Fasting_rs6542772 | S5 | LIMS1 | rs142812798S7  | DIAPH1      | 7.24E-07 | 1        | 4.56E-04    | 2.51E-06 | 1 | 0.00250878 |
| phe.Fasting_rs6542772 | S5 | LIMS1 | rs143377827S13 | "DIAPH1,LOC | 3.87E-07 | 1        | 2.62E-04    | 1.87E-06 | 1 | 0.00195041 |
| phe.Fasting_rs6542772 | S5 | LIMS1 | rs143691978S11 | DIAPH1      | 7.24E-07 | 1        | 4.56E-04    | 2.58E-06 | 1 | 0.00256916 |
| phe.Fasting_rs6542772 | S5 | LIMS1 | rs144081334S11 | DIAPH1      | 7.24E-07 | 1        | 4.56E-04    | 2.58E-06 | 1 | 0.00256916 |
| phe.Fasting_rs6542772 | S5 | LIMS1 | rs144613910S8  | DIAPH1      | 2.35E-06 | 1        | 1.28E-03    | 5.58E-06 | 1 | 0.00500881 |
| phe.Fasting_rs6542772 | S5 | LIMS1 | rs145027704S11 | DIAPH1      | 7.24E-07 | 1        | 4.56E-04    | 2.58E-06 | 1 | 0.00256916 |
| phe.Fasting_rs6542772 | S5 | LIMS1 | rs146220673S7  | DIAPH1      | 2.35E-06 | 1        | 1.28E-03    | 5.58E-06 | 1 | 0.00500881 |
| phe.Fasting_rs6542772 | S5 | LIMS1 | rs146622060S13 | DIAPH1      | 7.24E-07 | 1.00E+00 | 4.56E-04    | 2.58E-06 | 1 | 2.57E-03   |
| phe.Fasting_rs6542772 | S5 | LIMS1 | rs146878162S7  | DIAPH1      | 2.35E-06 | 1        | 0.00128405  | 5.58E-06 | 1 | 0.00500881 |
| phe.Fasting_rs6542772 | S5 | LIMS1 | rs147314451S8  | DIAPH1      | 2.35E-06 | 1.00E+00 | 1.28E-03    | 5.58E-06 | 1 | 0.00500881 |
| phe.Fasting_rs6542772 | S5 | LIMS1 | rs147417996S7  | DIAPH1      | 7.24E-07 | 1.00E+00 | 4.56E-04    | 2.58E-06 | 1 | 0.00256916 |
| phe.Fasting_rs6542772 | S5 | LIMS1 | rs147646948S7  | "LOC1005056 | 2.35E-06 | 1.00E+00 | 1.28E-03    | 5.58E-06 | 1 | 0.00500881 |
| phe.Fasting_rs6542772 | S5 | LIMS1 | rs147677041S8  | DIAPH1      | 7.24E-07 | 1        | 0.000456268 | 2.51E-06 | 1 | 0.00250878 |
| phe.Fasting_rs6542772 | S5 | LIMS1 | rs148116628S7  | DIAPH1      | 2.35E-06 | 1.00E+00 | 1.28E-03    | 5.58E-06 | 1 | 0.00500881 |
| phe.Fasting_rs6542772 | S5 | LIMS1 | rs148423011S7  | DIAPH1      | 2.35E-06 | 1.00E+00 | 1.28E-03    | 5.58E-06 | 1 | 0.00500881 |
| phe.Fasting_rs6542772 | S5 | LIMS1 | rs149019627S8  | DIAPH1      | 7.24E-07 | 1.00E+00 | 4.56E-04    | 2.51E-06 | 1 | 0.00250878 |
| phe.Fasting_rs6542772 | S5 | LIMS1 | rs149075406S8  | DIAPH1      | 2.35E-06 | 1.00E+00 | 1.28E-03    | 5.58E-06 | 1 | 0.00500881 |
| phe.Fasting_rs6542772 | S5 | LIMS1 | rs149334783S8  | DIAPH1      | 2.35E-06 | 1.00E+00 | 1.28E-03    | 5.58E-06 | 1 | 0.00500881 |
| phe.Fasting_rs6542772 | S5 | LIMS1 | rs149791570S5  | DIAPH1      | 7.24E-07 | 1.00E+00 | 4.56E-04    | 2.51E-06 | 1 | 2.51E-03   |
| phe.Fasting_rs6542772 | S5 | LIMS1 | rs150452206S13 | "DIAPH1,LOC | 2.35E-06 | 1.00E+00 | 1.28E-03    | 5.58E-06 | 1 | 0.00500881 |
| phe.Fasting_rs6542772 | S5 | LIMS1 | rs150675915S7  | DIAPH1      | 2.35E-06 | 1.00E+00 | 1.28E-03    | 5.58E-06 | 1 | 0.00500881 |
| phe.Fasting_rs6542772 | S5 | LIMS1 | rs150765570S7  | DIAPH1      | 2.35E-06 | 1.00E+00 | 1.28E-03    | 5.58E-06 | 1 | 0.00500881 |

|                       |    |       |                |             |          |             |             |          |            |             |
|-----------------------|----|-------|----------------|-------------|----------|-------------|-------------|----------|------------|-------------|
| phe.Fasting_rs6542772 | S5 | LIMS1 | rs150992994S11 | "PCDHGA5,PI | 2.36E-06 | 1.00E+00    | 1.29E-03    | 2.32E-06 | 1          | 0.00235104  |
| phe.Fasting_rs6542772 | S5 | LIMS1 | rs151204700S8  | DIAPH1      | 2.35E-06 | 1.00E+00    | 1.28E-03    | 5.58E-06 | 1          | 5.01E-03    |
| phe.Fasting_rs6542772 | S5 | LIMS1 | rs151330468S8  | DIAPH1      | 7.24E-07 | 1.00E+00    | 4.56E-04    | 2.58E-06 | 1          | 0.00256916  |
| phe.Fasting_rs6542772 | S5 | LIMS1 | rs16833551 S5  | MYO1B       | 2.05E-05 | 1.00E+00    | 8.52E-03    | 1.40E-07 | 1          | 0.000192036 |
| phe.Fasting_rs6542772 | S5 | LIMS1 | rs180772028S8  | "DIAPH1,LOC | 2.35E-06 | 1           | 0.00128405  | 5.58E-06 | 1          | 5.01E-03    |
| phe.Fasting_rs6542772 | S5 | LIMS1 | rs181224861S7  | DIAPH1      | 2.35E-06 | 1           | 1.28E-03    | 5.58E-06 | 1          | 0.00500881  |
| phe.Fasting_rs6542772 | S5 | LIMS1 | rs182714699S8  | DIAPH1      | 2.35E-06 | 1           | 0.00128405  | 5.58E-06 | 1          | 0.00500881  |
| phe.Fasting_rs6542772 | S5 | LIMS1 | rs182965141S8  | DIAPH1      | 8.32E-07 | 1           | 0.000514411 | 1.64E-06 | 1          | 0.00173454  |
| phe.Fasting_rs6542772 | S5 | LIMS1 | rs183597049S7  | DIAPH1      | 2.35E-06 | 1           | 1.28E-03    | 5.58E-06 | 1          | 0.00500881  |
| phe.Fasting_rs6542772 | S5 | LIMS1 | rs183980988S2  | NA          | 2.35E-06 | 1.00E+00    | 1.28E-03    | 5.58E-06 | 1          | 0.00500881  |
| phe.Fasting_rs6542772 | S5 | LIMS1 | rs184233232S7  | DIAPH1      | 2.35E-06 | 1.00E+00    | 1.28E-03    | 5.58E-06 | 1          | 0.00500881  |
| phe.Fasting_rs6542772 | S5 | LIMS1 | rs184509477S13 | "PCDHGB4,PI | 2.35E-06 | 1.00E+00    | 1.28E-03    | 5.58E-06 | 1          | 0.00500881  |
| phe.Fasting_rs6542772 | S5 | LIMS1 | rs185069296S15 | "LOC1005056 | 2.35E-06 | 1.00E+00    | 1.28E-03    | 5.58E-06 | 1          | 0.00500881  |
| phe.Fasting_rs6542772 | S5 | LIMS1 | rs185502834S8  | DIAPH1      | 7.24E-07 | 1.00E+00    | 4.56E-04    | 2.51E-06 | 1          | 0.00250878  |
| phe.Fasting_rs6542772 | S5 | LIMS1 | rs185759881S7  | DIAPH1      | 2.35E-06 | 1.00E+00    | 1.28E-03    | 5.58E-06 | 1          | 0.00500881  |
| phe.Fasting_rs6542772 | S5 | LIMS1 | rs187000011S11 | DIAPH1      | 2.35E-06 | 1           | 0.00128405  | 5.58E-06 | 1          | 5.01E-03    |
| phe.Fasting_rs6542772 | S5 | LIMS1 | rs188981295S5  | "RPS27AP10, | 2.35E-06 | 1.00E+00    | 1.28E-03    | 5.58E-06 | 1          | 0.00500881  |
| phe.Fasting_rs6542772 | S5 | LIMS1 | rs190559574S7  | DIAPH1      | 7.24E-07 | 1.00E+00    | 4.56E-04    | 2.51E-06 | 1          | 0.00250878  |
| phe.Fasting_rs6542772 | S5 | LIMS1 | rs191544043S8  | DIAPH1      | 2.35E-06 | 1.00E+00    | 1.28E-03    | 5.58E-06 | 1          | 5.01E-03    |
| phe.Fasting_rs6542772 | S5 | LIMS1 | rs191766712S7  | DIAPH1      | 2.35E-06 | 1           | 0.00128405  | 5.58E-06 | 1          | 0.00500881  |
| phe.Fasting_rs6542772 | S5 | LIMS1 | rs192690040S7  | DIAPH1      | 2.35E-06 | 1.00E+00    | 1.28E-03    | 5.58E-06 | 1          | 0.00500881  |
| phe.Fasting_rs6542772 | S5 | LIMS1 | rs192765219S7  | DIAPH1      | 2.35E-06 | 1.00E+00    | 1.28E-03    | 5.58E-06 | 1          | 0.00500881  |
| phe.Fasting_rs6542772 | S5 | LIMS1 | rs192770525S7  | DIAPH1      | 2.35E-06 | 1.00E+00    | 1.28E-03    | 5.58E-06 | 1          | 0.00500881  |
| phe.Fasting_rs6542772 | S5 | LIMS1 | rs35990401 S7  | DIAPH1      | 4.67E-06 | 1.00E+00    | 2.34E-03    | 1.30E-06 | 1          | 0.00142873  |
| phe.Fasting_rs6542772 | S5 | LIMS1 | rs55900860 S7  | DIAPH1      | 7.24E-07 | 1.00E+00    | 4.56E-04    | 2.51E-06 | 1          | 0.00250878  |
| phe.Fasting_rs6542772 | S5 | LIMS1 | rs61613048 S8  | MYO1B       | 2.16E-05 | 1.00E+00    | 8.91E-03    | 4.36E-07 | 1          | 0.000527729 |
| phe.Fasting_rs6542772 | S5 | LIMS1 | rs73058677 S5  | MYO1B       | 1.92E-05 | 1.00E+00    | 8.04E-03    | 2.24E-07 | 1          | 0.000293135 |
| phe.Fasting_rs6553443 | S8 | NEK1  | rs112027720S7  | DIAPH1      | 9.17E-12 | 0.000374383 | 1.48E-08    | 2.23E-08 | 0.908274   | 3.74E-05    |
| phe.Fasting_rs6553443 | S8 | NEK1  | rs112089881S8  | ZFAND4      | 1.84E-18 | 7.51E-11    | 3.89E-14    | 5.67E-09 | 0.230592   | 1.11E-05    |
| phe.Fasting_rs6553443 | S8 | NEK1  | rs113219478S7  | DIAPH1      | 9.17E-12 | 0.000374383 | 1.48E-08    | 2.23E-08 | 0.908274   | 3.74E-05    |
| phe.Fasting_rs6553443 | S8 | NEK1  | rs113357907S24 | ISL1        | 6.12E-18 | 2.50E-10    | 7.50E-14    | 9.34E-16 | 3.80E-08   | 1.16E-11    |
| phe.Fasting_rs6553443 | S8 | NEK1  | rs115787552S5  | KPNA3       | 3.50E-16 | 1.43E-08    | 1.15E-12    | 2.15E-07 | 1          | 0.000281471 |
| phe.Fasting_rs6553443 | S8 | NEK1  | rs115888477S8  | NA          | 2.70E-15 | 1.10E-07    | 7.57E-12    | 1.63E-08 | 0.66442    | 2.86E-05    |
| phe.Fasting_rs6553443 | S8 | NEK1  | rs116011837S9  | BRD2        | 2.29E-17 | 9.34E-10    | 1.45E-13    | 2.21E-10 | 0.00900315 | 6.20E-07    |
| phe.Fasting_rs6553443 | S8 | NEK1  | rs116079984S8  | KPNA3       | 3.50E-16 | 1.43E-08    | 1.15E-12    | 2.52E-07 | 1          | 0.000325188 |
| phe.Fasting_rs6553443 | S8 | NEK1  | rs116120727S9  | BRD2        | 2.29E-17 | 9.34E-10    | 1.45E-13    | 2.21E-10 | 0.00900315 | 6.20E-07    |
| phe.Fasting_rs6553443 | S8 | NEK1  | rs116279995S20 | "PCDHGA4,PI | 2.15E-05 | 1           | 8.87E-03    | 2.34E-07 | 1          | 0.000303649 |
| phe.Fasting_rs6553443 | S8 | NEK1  | rs138090701S5  | HDAC3       | 1.02E-12 | 4.17E-05    | 2.10E-09    | 1.29E-08 | 0.523399   | 2.33E-05    |
| phe.Fasting_rs6553443 | S8 | NEK1  | rs138136869S7  | DIAPH1      | 1.65E-12 | 6.74E-05    | 3.16E-09    | 3.12E-09 | 0.127195   | 6.59E-06    |
| phe.Fasting_rs6553443 | S8 | NEK1  | rs138457103S10 | DIAPH1      | 5.43E-12 | 2.22E-04    | 9.60E-09    | 2.09E-08 | 0.850097   | 3.57E-05    |

|                       |    |      |                |             |          |             |            |          |          |             |
|-----------------------|----|------|----------------|-------------|----------|-------------|------------|----------|----------|-------------|
| phe.Fasting_rs6553443 | S8 | NEK1 | rs138487229S11 | DIAPH1      | 9.17E-12 | 0.000374383 | 1.48E-08   | 2.23E-08 | 0.908274 | 3.74E-05    |
| phe.Fasting_rs6553443 | S8 | NEK1 | rs138738950S8  | "PCDHGB2,Pi | 9.17E-12 | 3.74E-04    | 1.48E-08   | 2.22E-08 | 0.904374 | 3.74E-05    |
| phe.Fasting_rs6553443 | S8 | NEK1 | rs139297927S8  | DIAPH1      | 9.17E-12 | 3.74E-04    | 1.48E-08   | 2.23E-08 | 0.908274 | 3.74E-05    |
| phe.Fasting_rs6553443 | S8 | NEK1 | rs139337303S8  | DIAPH1      | 9.17E-12 | 3.74E-04    | 1.48E-08   | 2.23E-08 | 0.908274 | 3.74E-05    |
| phe.Fasting_rs6553443 | S8 | NEK1 | rs139403963S8  | DIAPH1      | 1.65E-12 | 6.74E-05    | 3.16E-09   | 3.12E-09 | 0.127195 | 6.59E-06    |
| phe.Fasting_rs6553443 | S8 | NEK1 | rs139621309S18 | "LOC1005056 | 9.17E-12 | 3.74E-04    | 1.48E-08   | 2.23E-08 | 0.908274 | 3.74E-05    |
| phe.Fasting_rs6553443 | S8 | NEK1 | rs139828110S8  | DIAPH1      | 1.65E-12 | 6.74E-05    | 3.16E-09   | 3.12E-09 | 0.127195 | 6.59E-06    |
| phe.Fasting_rs6553443 | S8 | NEK1 | rs140070363S8  | DIAPH1      | 9.17E-12 | 0.000374383 | 1.48E-08   | 2.23E-08 | 0.908274 | 3.74E-05    |
| phe.Fasting_rs6553443 | S8 | NEK1 | rs140644750S13 | DIAPH1      | 9.17E-12 | 3.74E-04    | 1.48E-08   | 2.23E-08 | 0.908274 | 3.74E-05    |
| phe.Fasting_rs6553443 | S8 | NEK1 | rs141022544S8  | DIAPH1      | 9.17E-12 | 3.74E-04    | 1.48E-08   | 2.23E-08 | 0.908274 | 3.74E-05    |
| phe.Fasting_rs6553443 | S8 | NEK1 | rs141525984S5  | DIAPH1      | 9.17E-12 | 3.74E-04    | 1.48E-08   | 2.23E-08 | 0.908274 | 3.74E-05    |
| phe.Fasting_rs6553443 | S8 | NEK1 | rs141926074S8  | ATE1        | 1.33E-06 | 1.00E+00    | 7.83E-04   | 1.98E-14 | 8.07E-07 | 1.59E-10    |
| phe.Fasting_rs6553443 | S8 | NEK1 | rs142480565S8  | DIAPH1      | 9.17E-12 | 3.74E-04    | 1.48E-08   | 2.23E-08 | 0.908274 | 3.74E-05    |
| phe.Fasting_rs6553443 | S8 | NEK1 | rs142718558S7  | "DIAPH1,LOC | 9.17E-12 | 3.74E-04    | 1.48E-08   | 2.23E-08 | 0.908274 | 3.74E-05    |
| phe.Fasting_rs6553443 | S8 | NEK1 | rs142789100S8  | DIAPH1      | 1.65E-12 | 6.74E-05    | 3.16E-09   | 3.12E-09 | 0.127195 | 6.59E-06    |
| phe.Fasting_rs6553443 | S8 | NEK1 | rs142812798S7  | DIAPH1      | 1.65E-12 | 6.74E-05    | 3.16E-09   | 3.12E-09 | 0.127195 | 6.59E-06    |
| phe.Fasting_rs6553443 | S8 | NEK1 | rs143377827S13 | "DIAPH1,LOC | 1.45E-12 | 5.90E-05    | 2.83E-09   | 2.57E-09 | 0.104505 | 5.52E-06    |
| phe.Fasting_rs6553443 | S8 | NEK1 | rs143691978S11 | DIAPH1      | 1.65E-12 | 6.74E-05    | 3.16E-09   | 5.06E-09 | 0.206028 | 1.01E-05    |
| phe.Fasting_rs6553443 | S8 | NEK1 | rs144081334S11 | DIAPH1      | 1.65E-12 | 6.74E-05    | 3.16E-09   | 5.06E-09 | 0.206028 | 1.01E-05    |
| phe.Fasting_rs6553443 | S8 | NEK1 | rs144613910S8  | DIAPH1      | 9.17E-12 | 0.000374383 | 1.48E-08   | 2.23E-08 | 0.908274 | 3.74E-05    |
| phe.Fasting_rs6553443 | S8 | NEK1 | rs145027704S11 | DIAPH1      | 1.65E-12 | 6.74E-05    | 3.16E-09   | 5.06E-09 | 0.206028 | 1.01E-05    |
| phe.Fasting_rs6553443 | S8 | NEK1 | rs146220673S7  | DIAPH1      | 9.17E-12 | 3.74E-04    | 1.48E-08   | 2.23E-08 | 0.908274 | 3.74E-05    |
| phe.Fasting_rs6553443 | S8 | NEK1 | rs146622060S13 | DIAPH1      | 1.65E-12 | 6.74E-05    | 3.16E-09   | 5.06E-09 | 0.206028 | 1.01E-05    |
| phe.Fasting_rs6553443 | S8 | NEK1 | rs146815317S5  | KPNA3       | 3.50E-16 | 1.43E-08    | 1.15E-12   | 2.15E-07 | 1        | 2.81E-04    |
| phe.Fasting_rs6553443 | S8 | NEK1 | rs146878162S7  | DIAPH1      | 9.17E-12 | 0.000374383 | 1.48E-08   | 2.23E-08 | 0.908274 | 3.74E-05    |
| phe.Fasting_rs6553443 | S8 | NEK1 | rs1470889S5    | ZC3H3       | 3.60E-08 | 1           | 3.04E-05   | 6.78E-07 | 1        | 0.000791674 |
| phe.Fasting_rs6553443 | S8 | NEK1 | rs1470890S5    | ZC3H3       | 3.60E-08 | 1           | 3.04E-05   | 6.78E-07 | 1        | 0.000791674 |
| phe.Fasting_rs6553443 | S8 | NEK1 | rs147314451S8  | DIAPH1      | 9.17E-12 | 0.000374383 | 1.48E-08   | 2.23E-08 | 0.908274 | 3.74E-05    |
| phe.Fasting_rs6553443 | S8 | NEK1 | rs147417996S7  | DIAPH1      | 1.65E-12 | 6.74E-05    | 3.16E-09   | 5.06E-09 | 0.206028 | 1.01E-05    |
| phe.Fasting_rs6553443 | S8 | NEK1 | rs147506725S21 | "PCDHGA1,Pi | 2.15E-05 | 1           | 0.00887266 | 2.34E-07 | 1        | 0.000303649 |
| phe.Fasting_rs6553443 | S8 | NEK1 | rs147646948S7  | "LOC1005056 | 9.17E-12 | 0.000374383 | 1.48E-08   | 2.23E-08 | 0.908274 | 3.74E-05    |
| phe.Fasting_rs6553443 | S8 | NEK1 | rs147677041S8  | DIAPH1      | 1.65E-12 | 6.74E-05    | 3.16E-09   | 3.12E-09 | 0.127195 | 6.59E-06    |
| phe.Fasting_rs6553443 | S8 | NEK1 | rs148116628S7  | DIAPH1      | 9.17E-12 | 0.000374383 | 1.48E-08   | 2.23E-08 | 0.908274 | 3.74E-05    |
| phe.Fasting_rs6553443 | S8 | NEK1 | rs148423011S7  | DIAPH1      | 9.17E-12 | 0.000374383 | 1.48E-08   | 2.23E-08 | 0.908274 | 3.74E-05    |
| phe.Fasting_rs6553443 | S8 | NEK1 | rs149019627S8  | DIAPH1      | 1.65E-12 | 6.74E-05    | 3.16E-09   | 3.12E-09 | 0.127195 | 6.59E-06    |
| phe.Fasting_rs6553443 | S8 | NEK1 | rs149075406S8  | DIAPH1      | 9.17E-12 | 0.000374383 | 1.48E-08   | 2.23E-08 | 0.908274 | 3.74E-05    |
| phe.Fasting_rs6553443 | S8 | NEK1 | rs149334783S8  | DIAPH1      | 9.17E-12 | 0.000374383 | 1.48E-08   | 2.23E-08 | 0.908274 | 3.74E-05    |
| phe.Fasting_rs6553443 | S8 | NEK1 | rs149553852S21 | "PCDHGA10,  | 2.15E-05 | 1           | 0.00887266 | 2.34E-07 | 1        | 0.000303649 |
| phe.Fasting_rs6553443 | S8 | NEK1 | rs149716949S5  | DIAPH1      | 7.67E-13 | 3.13E-05    | 1.59E-09   | 2.72E-09 | 0.110842 | 5.82E-06    |
| phe.Fasting_rs6553443 | S8 | NEK1 | rs149791570S5  | DIAPH1      | 1.65E-12 | 6.74E-05    | 3.16E-09   | 3.12E-09 | 0.127195 | 6.59E-06    |

|                       |    |      |             |     |             |          |             |            |          |           |             |
|-----------------------|----|------|-------------|-----|-------------|----------|-------------|------------|----------|-----------|-------------|
| phe.Fasting_rs6553443 | S8 | NEK1 | rs150117838 | S8  | KPNA3       | 3.50E-16 | 1.43E-08    | 1.15E-12   | 2.05E-07 | 1         | 0.000270369 |
| phe.Fasting_rs6553443 | S8 | NEK1 | rs150452206 | S13 | "DIAPH1,LOC | 9.17E-12 | 0.000374383 | 1.48E-08   | 2.23E-08 | 0.908274  | 3.74E-05    |
| phe.Fasting_rs6553443 | S8 | NEK1 | rs150675915 | S7  | DIAPH1      | 9.17E-12 | 0.000374383 | 1.48E-08   | 2.23E-08 | 0.908274  | 3.74E-05    |
| phe.Fasting_rs6553443 | S8 | NEK1 | rs150765570 | S7  | DIAPH1      | 9.17E-12 | 0.000374383 | 1.48E-08   | 2.23E-08 | 0.908274  | 3.74E-05    |
| phe.Fasting_rs6553443 | S8 | NEK1 | rs150992994 | S11 | "PCDHGA5,Pi | 9.47E-12 | 0.000386737 | 1.52E-08   | 2.14E-08 | 0.869105  | 3.65E-05    |
| phe.Fasting_rs6553443 | S8 | NEK1 | rs151204700 | S8  | DIAPH1      | 9.17E-12 | 0.000374383 | 1.48E-08   | 2.23E-08 | 0.908274  | 3.74E-05    |
| phe.Fasting_rs6553443 | S8 | NEK1 | rs151330468 | S8  | DIAPH1      | 1.65E-12 | 6.74E-05    | 3.16E-09   | 5.06E-09 | 0.206028  | 1.01E-05    |
| phe.Fasting_rs6553443 | S8 | NEK1 | rs16894241  | S4  | HIST1H2BK   | 5.24E-08 | 1           | 4.28E-05   | 5.37E-07 | 1         | 0.000638437 |
| phe.Fasting_rs6553443 | S8 | NEK1 | rs180772028 | S8  | "DIAPH1,LOC | 9.17E-12 | 0.000374383 | 1.48E-08   | 2.23E-08 | 0.908274  | 3.74E-05    |
| phe.Fasting_rs6553443 | S8 | NEK1 | rs181224861 | S7  | DIAPH1      | 9.17E-12 | 0.000374383 | 1.48E-08   | 2.23E-08 | 0.908274  | 3.74E-05    |
| phe.Fasting_rs6553443 | S8 | NEK1 | rs181247960 | S21 | "PCDHGA9,Pi | 2.15E-05 | 1           | 0.00887266 | 2.34E-07 | 1         | 0.000303649 |
| phe.Fasting_rs6553443 | S8 | NEK1 | rs181824655 | S21 | "PCDHGB6,Pi | 2.15E-05 | 1           | 8.87E-03   | 2.34E-07 | 1         | 0.000303649 |
| phe.Fasting_rs6553443 | S8 | NEK1 | rs182714699 | S8  | DIAPH1      | 9.17E-12 | 0.000374383 | 1.48E-08   | 2.23E-08 | 0.908274  | 3.74E-05    |
| phe.Fasting_rs6553443 | S8 | NEK1 | rs182965141 | S8  | DIAPH1      | 2.01E-12 | 8.19E-05    | 3.80E-09   | 1.71E-09 | 0.0696833 | 3.83E-06    |
| phe.Fasting_rs6553443 | S8 | NEK1 | rs183597049 | S7  | DIAPH1      | 9.17E-12 | 0.000374383 | 1.48E-08   | 2.23E-08 | 0.908274  | 3.74E-05    |
| phe.Fasting_rs6553443 | S8 | NEK1 | rs183980988 | S2  | NA          | 9.17E-12 | 0.000374383 | 1.48E-08   | 2.23E-08 | 0.908274  | 3.74E-05    |
| phe.Fasting_rs6553443 | S8 | NEK1 | rs184233232 | S7  | DIAPH1      | 9.17E-12 | 0.000374383 | 1.48E-08   | 2.23E-08 | 0.908274  | 3.74E-05    |
| phe.Fasting_rs6553443 | S8 | NEK1 | rs184509477 | S13 | "PCDHGB4,Pi | 9.17E-12 | 0.000374383 | 1.48E-08   | 2.23E-08 | 0.908274  | 3.74E-05    |
| phe.Fasting_rs6553443 | S8 | NEK1 | rs185069296 | S15 | "LOC1005056 | 9.17E-12 | 0.000374383 | 1.48E-08   | 2.23E-08 | 0.908274  | 3.74E-05    |
| phe.Fasting_rs6553443 | S8 | NEK1 | rs185502834 | S8  | DIAPH1      | 1.65E-12 | 6.74E-05    | 3.16E-09   | 3.12E-09 | 0.127195  | 6.59E-06    |
| phe.Fasting_rs6553443 | S8 | NEK1 | rs185759881 | S7  | DIAPH1      | 9.17E-12 | 0.000374383 | 1.48E-08   | 2.23E-08 | 0.908274  | 3.74E-05    |
| phe.Fasting_rs6553443 | S8 | NEK1 | rs186288044 | S21 | "PCDHGB4,Pi | 2.15E-05 | 1           | 0.00887266 | 2.34E-07 | 1         | 0.000303649 |
| phe.Fasting_rs6553443 | S8 | NEK1 | rs187000011 | S11 | DIAPH1      | 9.17E-12 | 0.000374383 | 1.48E-08   | 2.23E-08 | 0.908274  | 3.74E-05    |
| phe.Fasting_rs6553443 | S8 | NEK1 | rs188981295 | S5  | "RPS27AP10, | 9.17E-12 | 0.000374383 | 1.48E-08   | 2.23E-08 | 0.908274  | 3.74E-05    |
| phe.Fasting_rs6553443 | S8 | NEK1 | rs190559574 | S7  | DIAPH1      | 1.65E-12 | 6.74E-05    | 3.16E-09   | 3.12E-09 | 0.127195  | 6.59E-06    |
| phe.Fasting_rs6553443 | S8 | NEK1 | rs191544043 | S8  | DIAPH1      | 9.17E-12 | 0.000374383 | 1.48E-08   | 2.23E-08 | 0.908274  | 3.74E-05    |
| phe.Fasting_rs6553443 | S8 | NEK1 | rs191766712 | S7  | DIAPH1      | 9.17E-12 | 0.000374383 | 1.48E-08   | 2.23E-08 | 0.908274  | 3.74E-05    |
| phe.Fasting_rs6553443 | S8 | NEK1 | rs192690040 | S7  | DIAPH1      | 9.17E-12 | 0.000374383 | 1.48E-08   | 2.23E-08 | 0.908274  | 3.74E-05    |
| phe.Fasting_rs6553443 | S8 | NEK1 | rs192765219 | S7  | DIAPH1      | 9.17E-12 | 0.000374383 | 1.48E-08   | 2.23E-08 | 0.908274  | 3.74E-05    |
| phe.Fasting_rs6553443 | S8 | NEK1 | rs192770525 | S7  | DIAPH1      | 9.17E-12 | 0.000374383 | 1.48E-08   | 2.23E-08 | 0.908274  | 3.74E-05    |
| phe.Fasting_rs6553443 | S8 | NEK1 | rs2924507   | S5  | ZC3H3       | 3.60E-08 | 1           | 3.04E-05   | 6.78E-07 | 1         | 0.000791674 |
| phe.Fasting_rs6553443 | S8 | NEK1 | rs2924508   | S8  | ZC3H3       | 3.60E-08 | 1           | 3.04E-05   | 9.52E-07 | 1         | 0.00108069  |
| phe.Fasting_rs6553443 | S8 | NEK1 | rs2924511   | S7  | ZC3H3       | 3.60E-08 | 1           | 3.04E-05   | 5.76E-07 | 1         | 0.000680958 |
| phe.Fasting_rs6553443 | S8 | NEK1 | rs2924512   | S7  | ZC3H3       | 4.02E-08 | 1           | 3.37E-05   | 7.17E-07 | 1         | 0.00083355  |
| phe.Fasting_rs6553443 | S8 | NEK1 | rs2956376   | S8  | ZC3H3       | 3.60E-08 | 1           | 3.04E-05   | 3.89E-07 | 1         | 0.000476148 |
| phe.Fasting_rs6553443 | S8 | NEK1 | rs2980270   | S7  | ZC3H3       | 3.60E-08 | 1           | 3.04E-05   | 3.89E-07 | 1         | 0.000476148 |
| phe.Fasting_rs6553443 | S8 | NEK1 | rs2980272   | S7  | ZC3H3       | 4.02E-08 | 1           | 3.37E-05   | 7.52E-07 | 1         | 0.000869902 |
| phe.Fasting_rs6553443 | S8 | NEK1 | rs2980275   | S5  | ZC3H3       | 3.60E-08 | 1           | 3.04E-05   | 6.78E-07 | 1         | 0.000791674 |
| phe.Fasting_rs6553443 | S8 | NEK1 | rs35990401  | S7  | DIAPH1      | 8.40E-12 | 0.000343123 | 1.39E-08   | 8.38E-09 | 0.340996  | 1.59E-05    |
| phe.Fasting_rs6553443 | S8 | NEK1 | rs366767    | S5  | ZC3H3       | 6.34E-08 | 1           | 5.08E-05   | 4.19E-07 | 1         | 0.000508745 |

|              |           |    |        |             |     |             |          |             |             |          |             |             |
|--------------|-----------|----|--------|-------------|-----|-------------|----------|-------------|-------------|----------|-------------|-------------|
| phe.Fasting_ | rs6553443 | S8 | NEK1   | rs55900860  | S7  | DIAPH1      | 1.65E-12 | 6.74E-05    | 3.16E-09    | 3.12E-09 | 0.127195    | 6.59E-06    |
| phe.Fasting_ | rs6553443 | S8 | NEK1   | rs6881310   | S23 | ISL1        | 4.23E-17 | 1.73E-09    | 2.22E-13    | 2.34E-12 | 9.53E-05    | 1.01E-08    |
| phe.Fasting_ | rs6553443 | S8 | NEK1   | rs73619637  | S8  | NA          | 1.02E-16 | 4.15E-09    | 4.31E-13    | 1.35E-08 | 0.549186    | 2.43E-05    |
| phe.Fasting_ | rs6553443 | S8 | NEK1   | rs77444916  | S23 | LOC642366   | 1.50E-17 | 6.11E-10    | 1.18E-13    | 8.75E-16 | 3.56E-08    | 1.16E-11    |
| phe.Fasting_ | rs6553443 | S8 | NEK1   | rs77798597  | S7  | KPNA3       | 3.50E-16 | 1.43E-08    | 1.15E-12    | 2.05E-07 | 1           | 0.000270369 |
| phe.Fasting_ | rs6553443 | S8 | NEK1   | rs78703708  | S7  | FAF2        | 9.25E-18 | 3.78E-10    | 9.24E-14    | 2.08E-07 | 1           | 0.000273911 |
| phe.Fasting_ | rs6553443 | S8 | NEK1   | rs78736524  | S5  | KPNA3       | 3.50E-16 | 1.43E-08    | 1.15E-12    | 2.15E-07 | 1           | 0.000281471 |
| phe.Fasting_ | rs6553443 | S8 | NEK1   | rs79517926  | S15 | "DIAPH1,LOC | 2.69E-12 | 0.000109672 | 4.97E-09    | 2.29E-09 | 0.0931701   | 4.98E-06    |
| phe.Fasting_ | rs6553443 | S8 | NEK1   | rs79781495  | S8  | KPNA3       | 3.50E-16 | 1.43E-08    | 1.15E-12    | 2.05E-07 | 1           | 0.000270369 |
| phe.Fasting_ | rs6553443 | S8 | NEK1   | rs80258830  | S24 | LOC642366   | 1.50E-17 | 6.11E-10    | 1.18E-13    | 8.75E-16 | 3.56E-08    | 1.16E-11    |
| phe.Fasting_ | rs6553443 | S8 | NEK1   | rs80332465  | S5  | KPNA3       | 3.75E-16 | 1.53E-08    | 1.22E-12    | 2.14E-07 | 1           | 0.000280922 |
| phe.Fasting_ | rs6553443 | S8 | NEK1   | rs80334773  | S5  | KPNA3       | 3.75E-16 | 1.53E-08    | 1.22E-12    | 2.14E-07 | 1           | 0.000280922 |
| phe.Fasting_ | rs6604877 | S8 | FAM73A | rs116011837 | S9  | BRD2        | 1.84E-07 | 1           | 0.000131665 | 1.34E-07 | 1           | 0.000184741 |
| phe.Fasting_ | rs6604877 | S8 | FAM73A | rs116120727 | S9  | BRD2        | 1.84E-07 | 1           | 0.000131665 | 1.34E-07 | 1           | 0.000184741 |
| phe.Fasting_ | rs6695760 | S7 | ATF6   | rs114968018 | S21 | NA          | 1.57E-05 | 1           | 0.00675704  | 3.21E-06 | 1           | 0.0031047   |
| phe.Fasting_ | rs6700518 | S8 | UBE4B  | rs112348319 | S8  | SPTLC1      | 5.20E-06 | 1           | 0.002579    | 9.70E-07 | 1           | 0.00109881  |
| phe.Fasting_ | rs6700518 | S8 | UBE4B  | rs112608164 | S8  | SPTLC1      | 5.20E-06 | 1           | 0.002579    | 9.70E-07 | 1           | 0.00109881  |
| phe.Fasting_ | rs6700518 | S8 | UBE4B  | rs113568654 | S12 | SPTLC1      | 5.96E-06 | 1           | 0.0029059   | 9.19E-06 | 1           | 0.00761741  |
| phe.Fasting_ | rs6700518 | S8 | UBE4B  | rs138090701 | S5  | HDAC3       | 1.92E-05 | 1           | 0.00804507  | 1.07E-06 | 1           | 0.00120484  |
| phe.Fasting_ | rs6700518 | S8 | UBE4B  | rs140524622 | S7  | MRPL10      | 1.55E-09 | 0.0634081   | 1.65E-06    | 2.04E-06 | 1           | 0.0021058   |
| phe.Fasting_ | rs6700518 | S8 | UBE4B  | rs149716949 | S5  | DIAPH1      | 1.56E-05 | 1           | 6.71E-03    | 8.65E-07 | 1           | 0.000988966 |
| phe.Fasting_ | rs6700518 | S8 | UBE4B  | rs6881310   | S23 | ISL1        | 4.50E-07 | 1           | 0.000297773 | 9.35E-06 | 1           | 0.00771941  |
| phe.Fasting_ | rs6700518 | S8 | UBE4B  | rs76542405  | S5  | SPTLC1      | 5.20E-06 | 1           | 2.58E-03    | 9.70E-07 | 1           | 0.00109881  |
| phe.Fasting_ | rs6700518 | S8 | UBE4B  | rs77444916  | S23 | LOC642366   | 6.09E-07 | 1           | 3.91E-04    | 4.57E-12 | 0.000185882 | 1.82E-08    |
| phe.Fasting_ | rs6700518 | S8 | UBE4B  | rs77523818  | S7  | SPTLC1      | 5.20E-06 | 1           | 2.58E-03    | 9.70E-07 | 1           | 0.00109881  |
| phe.Fasting_ | rs6700518 | S8 | UBE4B  | rs77845645  | S21 | NA          | 9.77E-07 | 1           | 5.94E-04    | 6.51E-09 | 0.265044    | 1.26E-05    |
| phe.Fasting_ | rs6700518 | S8 | UBE4B  | rs80258830  | S24 | LOC642366   | 6.09E-07 | 1           | 3.91E-04    | 4.57E-12 | 0.000185882 | 1.82E-08    |
| phe.Fasting_ | rs6737333 | S5 | LIMS1  | rs112027720 | S7  | DIAPH1      | 7.07E-08 | 1           | 5.59E-05    | 4.80E-06 | 1           | 0.0044182   |
| phe.Fasting_ | rs6737333 | S5 | LIMS1  | rs112940854 | S5  | MYO1B       | 1.56E-05 | 1           | 6.72E-03    | 7.12E-07 | 1           | 0.000828337 |
| phe.Fasting_ | rs6737333 | S5 | LIMS1  | rs113219478 | S7  | DIAPH1      | 7.07E-08 | 1           | 5.59E-05    | 4.80E-06 | 1           | 0.0044182   |
| phe.Fasting_ | rs6737333 | S5 | LIMS1  | rs115888477 | S8  | NA          | 5.33E-07 | 1.00E+00    | 3.48E-04    | 1.53E-07 | 1           | 0.000208323 |
| phe.Fasting_ | rs6737333 | S5 | LIMS1  | rs138090701 | S5  | HDAC3       | 9.72E-08 | 1.00E+00    | 7.43E-05    | 6.47E-06 | 1           | 5.68E-03    |
| phe.Fasting_ | rs6737333 | S5 | LIMS1  | rs138136869 | S7  | DIAPH1      | 1.65E-08 | 6.76E-01    | 1.48E-05    | 2.08E-06 | 1           | 0.00214474  |
| phe.Fasting_ | rs6737333 | S5 | LIMS1  | rs138457103 | S10 | DIAPH1      | 1.52E-06 | 1.00E+00    | 8.85E-04    | 7.68E-06 | 1           | 6.55E-03    |
| phe.Fasting_ | rs6737333 | S5 | LIMS1  | rs138487229 | S11 | DIAPH1      | 7.07E-08 | 1           | 5.59E-05    | 4.80E-06 | 1           | 0.0044182   |
| phe.Fasting_ | rs6737333 | S5 | LIMS1  | rs138738950 | S8  | "PCDHGB2,Pi | 7.07E-08 | 1           | 5.59E-05    | 4.80E-06 | 1           | 0.0044182   |
| phe.Fasting_ | rs6737333 | S5 | LIMS1  | rs139297927 | S8  | DIAPH1      | 7.07E-08 | 1           | 5.59E-05    | 4.80E-06 | 1           | 0.0044182   |
| phe.Fasting_ | rs6737333 | S5 | LIMS1  | rs139337303 | S8  | DIAPH1      | 7.07E-08 | 1           | 5.59E-05    | 4.80E-06 | 1           | 0.0044182   |
| phe.Fasting_ | rs6737333 | S5 | LIMS1  | rs139403963 | S8  | DIAPH1      | 1.65E-08 | 0.675571    | 1.48E-05    | 2.08E-06 | 1           | 0.00214474  |
| phe.Fasting_ | rs6737333 | S5 | LIMS1  | rs139621309 | S18 | "LOC1005056 | 7.07E-08 | 1           | 5.59E-05    | 4.80E-06 | 1           | 0.0044182   |

|                       |    |       |                |             |          |          |          |          |   |             |
|-----------------------|----|-------|----------------|-------------|----------|----------|----------|----------|---|-------------|
| phe.Fasting_rs6737333 | S5 | LIMS1 | rs139828110S8  | DIAPH1      | 1.65E-08 | 0.675571 | 1.48E-05 | 2.08E-06 | 1 | 0.00214474  |
| phe.Fasting_rs6737333 | S5 | LIMS1 | rs140070363S8  | DIAPH1      | 7.07E-08 | 1        | 5.59E-05 | 4.80E-06 | 1 | 0.0044182   |
| phe.Fasting_rs6737333 | S5 | LIMS1 | rs140644750S13 | DIAPH1      | 7.07E-08 | 1        | 5.59E-05 | 4.80E-06 | 1 | 0.0044182   |
| phe.Fasting_rs6737333 | S5 | LIMS1 | rs141022544S8  | DIAPH1      | 7.07E-08 | 1        | 5.59E-05 | 4.80E-06 | 1 | 0.0044182   |
| phe.Fasting_rs6737333 | S5 | LIMS1 | rs141525984S5  | DIAPH1      | 7.07E-08 | 1.00E+00 | 5.59E-05 | 4.80E-06 | 1 | 0.0044182   |
| phe.Fasting_rs6737333 | S5 | LIMS1 | rs142480565S8  | DIAPH1      | 7.07E-08 | 1.00E+00 | 5.59E-05 | 4.80E-06 | 1 | 4.42E-03    |
| phe.Fasting_rs6737333 | S5 | LIMS1 | rs142718558S7  | "DIAPH1,LOC | 7.07E-08 | 1.00E+00 | 5.59E-05 | 4.80E-06 | 1 | 0.0044182   |
| phe.Fasting_rs6737333 | S5 | LIMS1 | rs142789100S8  | DIAPH1      | 1.65E-08 | 6.76E-01 | 1.48E-05 | 2.08E-06 | 1 | 0.00214474  |
| phe.Fasting_rs6737333 | S5 | LIMS1 | rs142812798S7  | DIAPH1      | 1.65E-08 | 6.76E-01 | 1.48E-05 | 2.08E-06 | 1 | 0.00214474  |
| phe.Fasting_rs6737333 | S5 | LIMS1 | rs143377827S13 | "DIAPH1,LOC | 9.58E-09 | 0.39112  | 8.98E-06 | 1.55E-06 | 1 | 0.00166139  |
| phe.Fasting_rs6737333 | S5 | LIMS1 | rs143691978S11 | DIAPH1      | 1.65E-08 | 6.76E-01 | 1.48E-05 | 2.15E-06 | 1 | 0.00220037  |
| phe.Fasting_rs6737333 | S5 | LIMS1 | rs144081334S11 | DIAPH1      | 1.65E-08 | 6.76E-01 | 1.48E-05 | 2.15E-06 | 1 | 2.20E-03    |
| phe.Fasting_rs6737333 | S5 | LIMS1 | rs144613910S8  | DIAPH1      | 7.07E-08 | 1.00E+00 | 5.59E-05 | 4.80E-06 | 1 | 0.0044182   |
| phe.Fasting_rs6737333 | S5 | LIMS1 | rs145027704S11 | DIAPH1      | 1.65E-08 | 6.76E-01 | 1.48E-05 | 2.15E-06 | 1 | 2.20E-03    |
| phe.Fasting_rs6737333 | S5 | LIMS1 | rs146220673S7  | DIAPH1      | 7.07E-08 | 1        | 5.59E-05 | 4.80E-06 | 1 | 0.0044182   |
| phe.Fasting_rs6737333 | S5 | LIMS1 | rs146622060S13 | DIAPH1      | 1.65E-08 | 0.675571 | 1.48E-05 | 2.15E-06 | 1 | 0.00220037  |
| phe.Fasting_rs6737333 | S5 | LIMS1 | rs146878162S7  | DIAPH1      | 7.07E-08 | 1        | 5.59E-05 | 4.80E-06 | 1 | 0.0044182   |
| phe.Fasting_rs6737333 | S5 | LIMS1 | rs147314451S8  | DIAPH1      | 7.07E-08 | 1        | 5.59E-05 | 4.80E-06 | 1 | 0.0044182   |
| phe.Fasting_rs6737333 | S5 | LIMS1 | rs147417996S7  | DIAPH1      | 1.65E-08 | 0.675571 | 1.48E-05 | 2.15E-06 | 1 | 0.00220037  |
| phe.Fasting_rs6737333 | S5 | LIMS1 | rs147646948S7  | "LOC1005056 | 7.07E-08 | 1        | 5.59E-05 | 4.80E-06 | 1 | 0.0044182   |
| phe.Fasting_rs6737333 | S5 | LIMS1 | rs147677041S8  | DIAPH1      | 1.65E-08 | 0.675571 | 1.48E-05 | 2.08E-06 | 1 | 0.00214474  |
| phe.Fasting_rs6737333 | S5 | LIMS1 | rs148116628S7  | DIAPH1      | 7.07E-08 | 1        | 5.59E-05 | 4.80E-06 | 1 | 0.0044182   |
| phe.Fasting_rs6737333 | S5 | LIMS1 | rs148423011S7  | DIAPH1      | 7.07E-08 | 1        | 5.59E-05 | 4.80E-06 | 1 | 0.0044182   |
| phe.Fasting_rs6737333 | S5 | LIMS1 | rs149019627S8  | DIAPH1      | 1.65E-08 | 0.675571 | 1.48E-05 | 2.08E-06 | 1 | 0.00214474  |
| phe.Fasting_rs6737333 | S5 | LIMS1 | rs149075406S8  | DIAPH1      | 7.07E-08 | 1.00E+00 | 5.59E-05 | 4.80E-06 | 1 | 0.0044182   |
| phe.Fasting_rs6737333 | S5 | LIMS1 | rs149334783S8  | DIAPH1      | 7.07E-08 | 1.00E+00 | 5.59E-05 | 4.80E-06 | 1 | 4.42E-03    |
| phe.Fasting_rs6737333 | S5 | LIMS1 | rs149716949S5  | DIAPH1      | 1.58E-07 | 1.00E+00 | 1.15E-04 | 3.26E-06 | 1 | 0.00314807  |
| phe.Fasting_rs6737333 | S5 | LIMS1 | rs149791570S5  | DIAPH1      | 1.65E-08 | 6.76E-01 | 1.48E-05 | 2.08E-06 | 1 | 0.00214474  |
| phe.Fasting_rs6737333 | S5 | LIMS1 | rs150452206S13 | "DIAPH1,LOC | 7.07E-08 | 1.00E+00 | 5.59E-05 | 4.80E-06 | 1 | 0.0044182   |
| phe.Fasting_rs6737333 | S5 | LIMS1 | rs150675915S7  | DIAPH1      | 7.07E-08 | 1        | 5.59E-05 | 4.80E-06 | 1 | 0.0044182   |
| phe.Fasting_rs6737333 | S5 | LIMS1 | rs150765570S7  | DIAPH1      | 7.07E-08 | 1        | 5.59E-05 | 4.80E-06 | 1 | 4.42E-03    |
| phe.Fasting_rs6737333 | S5 | LIMS1 | rs150992994S11 | "PCDHGA5,Pi | 6.95E-08 | 1        | 5.51E-05 | 1.98E-06 | 1 | 0.0020499   |
| phe.Fasting_rs6737333 | S5 | LIMS1 | rs151204700S8  | DIAPH1      | 7.07E-08 | 1        | 5.59E-05 | 4.80E-06 | 1 | 0.0044182   |
| phe.Fasting_rs6737333 | S5 | LIMS1 | rs151330468S8  | DIAPH1      | 1.65E-08 | 0.675571 | 1.48E-05 | 2.15E-06 | 1 | 0.00220037  |
| phe.Fasting_rs6737333 | S5 | LIMS1 | rs16833551 S5  | MYO1B       | 1.67E-05 | 1        | 7.12E-03 | 1.19E-07 | 1 | 0.000165372 |
| phe.Fasting_rs6737333 | S5 | LIMS1 | rs180772028S8  | "DIAPH1,LOC | 7.07E-08 | 1        | 5.59E-05 | 4.80E-06 | 1 | 0.0044182   |
| phe.Fasting_rs6737333 | S5 | LIMS1 | rs181224861S7  | DIAPH1      | 7.07E-08 | 1        | 5.59E-05 | 4.80E-06 | 1 | 0.0044182   |
| phe.Fasting_rs6737333 | S5 | LIMS1 | rs182714699S8  | DIAPH1      | 7.07E-08 | 1        | 5.59E-05 | 4.80E-06 | 1 | 0.0044182   |
| phe.Fasting_rs6737333 | S5 | LIMS1 | rs182965141S8  | DIAPH1      | 1.92E-08 | 7.83E-01 | 1.70E-05 | 1.34E-06 | 1 | 0.00146365  |
| phe.Fasting_rs6737333 | S5 | LIMS1 | rs183597049S7  | DIAPH1      | 7.07E-08 | 1.00E+00 | 5.59E-05 | 4.80E-06 | 1 | 0.0044182   |

|                       |    |       |                 |             |          |          |          |          |   |             |
|-----------------------|----|-------|-----------------|-------------|----------|----------|----------|----------|---|-------------|
| phe.Fasting_rs6737333 | S5 | LIMS1 | rs183980988 S2  | NA          | 7.07E-08 | 1        | 5.59E-05 | 4.80E-06 | 1 | 0.0044182   |
| phe.Fasting_rs6737333 | S5 | LIMS1 | rs184233232 S7  | DIAPH1      | 7.07E-08 | 1        | 5.59E-05 | 4.80E-06 | 1 | 0.0044182   |
| phe.Fasting_rs6737333 | S5 | LIMS1 | rs184509477 S13 | "PCDHGB4,PI | 7.07E-08 | 1        | 5.59E-05 | 4.80E-06 | 1 | 0.0044182   |
| phe.Fasting_rs6737333 | S5 | LIMS1 | rs185069296 S15 | "LOC1005056 | 7.07E-08 | 1        | 5.59E-05 | 4.80E-06 | 1 | 0.0044182   |
| phe.Fasting_rs6737333 | S5 | LIMS1 | rs185502834 S8  | DIAPH1      | 1.65E-08 | 0.675571 | 1.48E-05 | 2.08E-06 | 1 | 0.00214474  |
| phe.Fasting_rs6737333 | S5 | LIMS1 | rs185759881 S7  | DIAPH1      | 7.07E-08 | 1        | 5.59E-05 | 4.80E-06 | 1 | 4.42E-03    |
| phe.Fasting_rs6737333 | S5 | LIMS1 | rs187000011 S11 | DIAPH1      | 7.07E-08 | 1        | 5.59E-05 | 4.80E-06 | 1 | 4.42E-03    |
| phe.Fasting_rs6737333 | S5 | LIMS1 | rs188981295 S5  | "RPS27AP10, | 7.07E-08 | 1.00E+00 | 5.59E-05 | 4.80E-06 | 1 | 0.0044182   |
| phe.Fasting_rs6737333 | S5 | LIMS1 | rs190559574 S7  | DIAPH1      | 1.65E-08 | 0.675571 | 1.48E-05 | 2.08E-06 | 1 | 0.00214474  |
| phe.Fasting_rs6737333 | S5 | LIMS1 | rs191544043 S8  | DIAPH1      | 7.07E-08 | 1        | 5.59E-05 | 4.80E-06 | 1 | 0.0044182   |
| phe.Fasting_rs6737333 | S5 | LIMS1 | rs191766712 S7  | DIAPH1      | 7.07E-08 | 1        | 5.59E-05 | 4.80E-06 | 1 | 0.0044182   |
| phe.Fasting_rs6737333 | S5 | LIMS1 | rs192690040 S7  | DIAPH1      | 7.07E-08 | 1.00E+00 | 5.59E-05 | 4.80E-06 | 1 | 0.0044182   |
| phe.Fasting_rs6737333 | S5 | LIMS1 | rs192765219 S7  | DIAPH1      | 7.07E-08 | 1        | 5.59E-05 | 4.80E-06 | 1 | 0.0044182   |
| phe.Fasting_rs6737333 | S5 | LIMS1 | rs192770525 S7  | DIAPH1      | 7.07E-08 | 1.00E+00 | 5.59E-05 | 4.80E-06 | 1 | 0.0044182   |
| phe.Fasting_rs6737333 | S5 | LIMS1 | rs35990401 S7   | DIAPH1      | 1.13E-07 | 1        | 8.51E-05 | 1.11E-06 | 1 | 0.0012452   |
| phe.Fasting_rs6737333 | S5 | LIMS1 | rs55900860 S7   | DIAPH1      | 1.65E-08 | 0.675571 | 1.48E-05 | 2.08E-06 | 1 | 0.00214474  |
| phe.Fasting_rs6737333 | S5 | LIMS1 | rs61613048 S8   | MYO1B       | 1.79E-05 | 1        | 7.57E-03 | 3.68E-07 | 1 | 0.000455386 |
| phe.Fasting_rs6737333 | S5 | LIMS1 | rs73058677 S5   | MYO1B       | 1.56E-05 | 1.00E+00 | 6.72E-03 | 1.88E-07 | 1 | 0.000250599 |
| phe.Fasting_rs6747243 | S5 | LIMS1 | rs112027720 S7  | DIAPH1      | 7.07E-08 | 1.00E+00 | 5.59E-05 | 4.80E-06 | 1 | 0.0044182   |
| phe.Fasting_rs6747243 | S5 | LIMS1 | rs112940854 S5  | MYO1B       | 1.56E-05 | 1.00E+00 | 6.72E-03 | 7.12E-07 | 1 | 0.000828337 |
| phe.Fasting_rs6747243 | S5 | LIMS1 | rs113219478 S7  | DIAPH1      | 7.07E-08 | 1        | 5.59E-05 | 4.80E-06 | 1 | 0.0044182   |
| phe.Fasting_rs6747243 | S5 | LIMS1 | rs115888477 S8  | NA          | 5.33E-07 | 1        | 3.48E-04 | 1.53E-07 | 1 | 0.000208323 |
| phe.Fasting_rs6747243 | S5 | LIMS1 | rs138090701 S5  | HDAC3       | 9.72E-08 | 1        | 7.43E-05 | 6.47E-06 | 1 | 0.00567942  |
| phe.Fasting_rs6747243 | S5 | LIMS1 | rs138136869 S7  | DIAPH1      | 1.65E-08 | 0.675571 | 1.48E-05 | 2.08E-06 | 1 | 0.00214474  |
| phe.Fasting_rs6747243 | S5 | LIMS1 | rs138457103 S10 | DIAPH1      | 1.52E-06 | 1.00E+00 | 8.85E-04 | 7.68E-06 | 1 | 6.55E-03    |
| phe.Fasting_rs6747243 | S5 | LIMS1 | rs138487229 S11 | DIAPH1      | 7.07E-08 | 1.00E+00 | 5.59E-05 | 4.80E-06 | 1 | 0.0044182   |
| phe.Fasting_rs6747243 | S5 | LIMS1 | rs138738950 S8  | "PCDHGB2,PI | 7.07E-08 | 1.00E+00 | 5.59E-05 | 4.80E-06 | 1 | 0.0044182   |
| phe.Fasting_rs6747243 | S5 | LIMS1 | rs139297927 S8  | DIAPH1      | 7.07E-08 | 1.00E+00 | 5.59E-05 | 4.80E-06 | 1 | 0.0044182   |
| phe.Fasting_rs6747243 | S5 | LIMS1 | rs139337303 S8  | DIAPH1      | 7.07E-08 | 1        | 5.59E-05 | 4.80E-06 | 1 | 0.0044182   |
| phe.Fasting_rs6747243 | S5 | LIMS1 | rs139403963 S8  | DIAPH1      | 1.65E-08 | 0.675571 | 1.48E-05 | 2.08E-06 | 1 | 0.00214474  |
| phe.Fasting_rs6747243 | S5 | LIMS1 | rs139621309 S18 | "LOC1005056 | 7.07E-08 | 1        | 5.59E-05 | 4.80E-06 | 1 | 0.0044182   |
| phe.Fasting_rs6747243 | S5 | LIMS1 | rs139828110 S8  | DIAPH1      | 1.65E-08 | 0.675571 | 1.48E-05 | 2.08E-06 | 1 | 0.00214474  |
| phe.Fasting_rs6747243 | S5 | LIMS1 | rs140070363 S8  | DIAPH1      | 7.07E-08 | 1        | 5.59E-05 | 4.80E-06 | 1 | 0.0044182   |
| phe.Fasting_rs6747243 | S5 | LIMS1 | rs140644750 S13 | DIAPH1      | 7.07E-08 | 1        | 5.59E-05 | 4.80E-06 | 1 | 0.0044182   |
| phe.Fasting_rs6747243 | S5 | LIMS1 | rs141022544 S8  | DIAPH1      | 7.07E-08 | 1        | 5.59E-05 | 4.80E-06 | 1 | 0.0044182   |
| phe.Fasting_rs6747243 | S5 | LIMS1 | rs141525984 S5  | DIAPH1      | 7.07E-08 | 1        | 5.59E-05 | 4.80E-06 | 1 | 0.0044182   |
| phe.Fasting_rs6747243 | S5 | LIMS1 | rs142480565 S8  | DIAPH1      | 7.07E-08 | 1        | 5.59E-05 | 4.80E-06 | 1 | 4.42E-03    |
| phe.Fasting_rs6747243 | S5 | LIMS1 | rs142718558 S7  | "DIAPH1,LOC | 7.07E-08 | 1        | 5.59E-05 | 4.80E-06 | 1 | 0.0044182   |
| phe.Fasting_rs6747243 | S5 | LIMS1 | rs142789100 S8  | DIAPH1      | 1.65E-08 | 0.675571 | 1.48E-05 | 2.08E-06 | 1 | 0.00214474  |
| phe.Fasting_rs6747243 | S5 | LIMS1 | rs142812798 S7  | DIAPH1      | 1.65E-08 | 0.675571 | 1.48E-05 | 2.08E-06 | 1 | 0.00214474  |

|                       |    |       |                 |             |          |          |            |          |   |             |
|-----------------------|----|-------|-----------------|-------------|----------|----------|------------|----------|---|-------------|
| phe.Fasting_rs6747243 | S5 | LIMS1 | rs143377827 S13 | "DIAPH1,LOC | 9.58E-09 | 0.39112  | 8.98E-06   | 1.55E-06 | 1 | 0.00166139  |
| phe.Fasting_rs6747243 | S5 | LIMS1 | rs143691978 S11 | DIAPH1      | 1.65E-08 | 0.675571 | 1.48E-05   | 2.15E-06 | 1 | 0.00220037  |
| phe.Fasting_rs6747243 | S5 | LIMS1 | rs144081334 S11 | DIAPH1      | 1.65E-08 | 0.675571 | 1.48E-05   | 2.15E-06 | 1 | 0.00220037  |
| phe.Fasting_rs6747243 | S5 | LIMS1 | rs144613910 S8  | DIAPH1      | 7.07E-08 | 1        | 5.59E-05   | 4.80E-06 | 1 | 0.0044182   |
| phe.Fasting_rs6747243 | S5 | LIMS1 | rs145027704 S11 | DIAPH1      | 1.65E-08 | 0.675571 | 1.48E-05   | 2.15E-06 | 1 | 0.00220037  |
| phe.Fasting_rs6747243 | S5 | LIMS1 | rs146220673 S7  | DIAPH1      | 7.07E-08 | 1        | 5.59E-05   | 4.80E-06 | 1 | 0.0044182   |
| phe.Fasting_rs6747243 | S5 | LIMS1 | rs146622060 S13 | DIAPH1      | 1.65E-08 | 0.675571 | 1.48E-05   | 2.15E-06 | 1 | 0.00220037  |
| phe.Fasting_rs6747243 | S5 | LIMS1 | rs146878162 S7  | DIAPH1      | 7.07E-08 | 1        | 5.59E-05   | 4.80E-06 | 1 | 0.0044182   |
| phe.Fasting_rs6747243 | S5 | LIMS1 | rs147314451 S8  | DIAPH1      | 7.07E-08 | 1.00E+00 | 5.59E-05   | 4.80E-06 | 1 | 0.0044182   |
| phe.Fasting_rs6747243 | S5 | LIMS1 | rs147417996 S7  | DIAPH1      | 1.65E-08 | 0.675571 | 1.48E-05   | 2.15E-06 | 1 | 0.00220037  |
| phe.Fasting_rs6747243 | S5 | LIMS1 | rs147646948 S7  | "LOC1005056 | 7.07E-08 | 1.00E+00 | 5.59E-05   | 4.80E-06 | 1 | 0.0044182   |
| phe.Fasting_rs6747243 | S5 | LIMS1 | rs147677041 S8  | DIAPH1      | 1.65E-08 | 0.675571 | 1.48E-05   | 2.08E-06 | 1 | 0.00214474  |
| phe.Fasting_rs6747243 | S5 | LIMS1 | rs148116628 S7  | DIAPH1      | 7.07E-08 | 1        | 5.59E-05   | 4.80E-06 | 1 | 0.0044182   |
| phe.Fasting_rs6747243 | S5 | LIMS1 | rs148423011 S7  | DIAPH1      | 7.07E-08 | 1        | 5.59E-05   | 4.80E-06 | 1 | 0.0044182   |
| phe.Fasting_rs6747243 | S5 | LIMS1 | rs149019627 S8  | DIAPH1      | 1.65E-08 | 0.675571 | 1.48E-05   | 2.08E-06 | 1 | 2.14E-03    |
| phe.Fasting_rs6747243 | S5 | LIMS1 | rs149075406 S8  | DIAPH1      | 7.07E-08 | 1        | 5.59E-05   | 4.80E-06 | 1 | 0.0044182   |
| phe.Fasting_rs6747243 | S5 | LIMS1 | rs149334783 S8  | DIAPH1      | 7.07E-08 | 1        | 5.59E-05   | 4.80E-06 | 1 | 0.0044182   |
| phe.Fasting_rs6747243 | S5 | LIMS1 | rs149716949 S5  | DIAPH1      | 1.58E-07 | 1        | 0.00011482 | 3.26E-06 | 1 | 0.00314807  |
| phe.Fasting_rs6747243 | S5 | LIMS1 | rs149791570 S5  | DIAPH1      | 1.65E-08 | 0.675571 | 1.48E-05   | 2.08E-06 | 1 | 0.00214474  |
| phe.Fasting_rs6747243 | S5 | LIMS1 | rs150452206 S13 | "DIAPH1,LOC | 7.07E-08 | 1        | 5.59E-05   | 4.80E-06 | 1 | 0.0044182   |
| phe.Fasting_rs6747243 | S5 | LIMS1 | rs150675915 S7  | DIAPH1      | 7.07E-08 | 1.00E+00 | 5.59E-05   | 4.80E-06 | 1 | 0.0044182   |
| phe.Fasting_rs6747243 | S5 | LIMS1 | rs150765570 S7  | DIAPH1      | 7.07E-08 | 1.00E+00 | 5.59E-05   | 4.80E-06 | 1 | 0.0044182   |
| phe.Fasting_rs6747243 | S5 | LIMS1 | rs150992994 S11 | "PCDHGA5,Pi | 6.95E-08 | 1        | 5.51E-05   | 1.98E-06 | 1 | 0.0020499   |
| phe.Fasting_rs6747243 | S5 | LIMS1 | rs151204700 S8  | DIAPH1      | 7.07E-08 | 1        | 5.59E-05   | 4.80E-06 | 1 | 0.0044182   |
| phe.Fasting_rs6747243 | S5 | LIMS1 | rs151330468 S8  | DIAPH1      | 1.65E-08 | 0.675571 | 1.48E-05   | 2.15E-06 | 1 | 0.00220037  |
| phe.Fasting_rs6747243 | S5 | LIMS1 | rs16833551 S5   | MYO1B       | 1.67E-05 | 1        | 7.12E-03   | 1.19E-07 | 1 | 0.000165372 |
| phe.Fasting_rs6747243 | S5 | LIMS1 | rs180772028 S8  | "DIAPH1,LOC | 7.07E-08 | 1.00E+00 | 5.59E-05   | 4.80E-06 | 1 | 0.0044182   |
| phe.Fasting_rs6747243 | S5 | LIMS1 | rs181224861 S7  | DIAPH1      | 7.07E-08 | 1        | 5.59E-05   | 4.80E-06 | 1 | 0.0044182   |
| phe.Fasting_rs6747243 | S5 | LIMS1 | rs182714699 S8  | DIAPH1      | 7.07E-08 | 1.00E+00 | 5.59E-05   | 4.80E-06 | 1 | 0.0044182   |
| phe.Fasting_rs6747243 | S5 | LIMS1 | rs182965141 S8  | DIAPH1      | 1.92E-08 | 0.782733 | 1.70E-05   | 1.34E-06 | 1 | 0.00146365  |
| phe.Fasting_rs6747243 | S5 | LIMS1 | rs183597049 S7  | DIAPH1      | 7.07E-08 | 1        | 5.59E-05   | 4.80E-06 | 1 | 0.0044182   |
| phe.Fasting_rs6747243 | S5 | LIMS1 | rs183980988 S2  | NA          | 7.07E-08 | 1.00E+00 | 5.59E-05   | 4.80E-06 | 1 | 4.42E-03    |
| phe.Fasting_rs6747243 | S5 | LIMS1 | rs184233232 S7  | DIAPH1      | 7.07E-08 | 1        | 5.59E-05   | 4.80E-06 | 1 | 0.0044182   |
| phe.Fasting_rs6747243 | S5 | LIMS1 | rs184509477 S13 | "PCDHGB4,Pi | 7.07E-08 | 1        | 5.59E-05   | 4.80E-06 | 1 | 4.42E-03    |
| phe.Fasting_rs6747243 | S5 | LIMS1 | rs185069296 S15 | "LOC1005056 | 7.07E-08 | 1.00E+00 | 5.59E-05   | 4.80E-06 | 1 | 0.0044182   |
| phe.Fasting_rs6747243 | S5 | LIMS1 | rs185502834 S7  | DIAPH1      | 1.65E-08 | 0.675571 | 1.48E-05   | 2.08E-06 | 1 | 2.14E-03    |
| phe.Fasting_rs6747243 | S5 | LIMS1 | rs185759881 S7  | DIAPH1      | 7.07E-08 | 1.00E+00 | 5.59E-05   | 4.80E-06 | 1 | 0.0044182   |
| phe.Fasting_rs6747243 | S5 | LIMS1 | rs187000011 S11 | DIAPH1      | 7.07E-08 | 1.00E+00 | 5.59E-05   | 4.80E-06 | 1 | 0.0044182   |
| phe.Fasting_rs6747243 | S5 | LIMS1 | rs188981295 S5  | "RPS27AP10, | 7.07E-08 | 1.00E+00 | 5.59E-05   | 4.80E-06 | 1 | 0.0044182   |
| phe.Fasting_rs6747243 | S5 | LIMS1 | rs190559574 S7  | DIAPH1      | 1.65E-08 | 6.76E-01 | 1.48E-05   | 2.08E-06 | 1 | 0.00214474  |



|                       |    |       |             |     |             |          |          |            |          |             |             |
|-----------------------|----|-------|-------------|-----|-------------|----------|----------|------------|----------|-------------|-------------|
| phe.Fasting_rs6747243 | S5 | LIMS1 | rs191544043 | S8  | DIAPH1      | 7.07E-08 | 1        | 5.59E-05   | 4.80E-06 | 1           | 0.0044182   |
| phe.Fasting_rs6747243 | S5 | LIMS1 | rs191766712 | S7  | DIAPH1      | 7.07E-08 | 1        | 5.59E-05   | 4.80E-06 | 1           | 0.0044182   |
| phe.Fasting_rs6747243 | S5 | LIMS1 | rs192690040 | S7  | DIAPH1      | 7.07E-08 | 1        | 5.59E-05   | 4.80E-06 | 1           | 0.0044182   |
| phe.Fasting_rs6747243 | S5 | LIMS1 | rs192765219 | S7  | DIAPH1      | 7.07E-08 | 1.00E+00 | 5.59E-05   | 4.80E-06 | 1           | 0.0044182   |
| phe.Fasting_rs6747243 | S5 | LIMS1 | rs192770525 | S7  | DIAPH1      | 7.07E-08 | 1        | 5.59E-05   | 4.80E-06 | 1           | 0.0044182   |
| phe.Fasting_rs6747243 | S5 | LIMS1 | rs35990401  | S7  | DIAPH1      | 1.13E-07 | 1        | 8.51E-05   | 1.11E-06 | 1           | 0.0012452   |
| phe.Fasting_rs6747243 | S5 | LIMS1 | rs55900860  | S7  | DIAPH1      | 1.65E-08 | 6.76E-01 | 1.48E-05   | 2.08E-06 | 1           | 2.14E-03    |
| phe.Fasting_rs6747243 | S5 | LIMS1 | rs61613048  | S8  | MYO1B       | 1.79E-05 | 1        | 0.00756697 | 3.68E-07 | 1           | 0.000455386 |
| phe.Fasting_rs6747243 | S5 | LIMS1 | rs73058677  | S5  | MYO1B       | 1.56E-05 | 1        | 6.72E-03   | 1.88E-07 | 1           | 2.51E-04    |
| phe.Fasting_rs6753834 | S8 | AAK1  | rs114334325 | S7  | AP3M2       | 3.17E-08 | 1.00E+00 | 2.71E-05   | 1.01E-09 | 0.0413052   | 2.41E-06    |
| phe.Fasting_rs6753834 | S8 | AAK1  | rs114394395 | S7  | AP3M2       | 3.31E-08 | 1        | 2.82E-05   | 1.01E-09 | 0.0413052   | 2.41E-06    |
| phe.Fasting_rs6753834 | S8 | AAK1  | rs116406581 | S2  | NA          | 1.81E-07 | 1.00E+00 | 1.30E-04   | 4.89E-11 | 0.00199003  | 1.58E-07    |
| phe.Fasting_rs6753834 | S8 | AAK1  | rs116696844 | S3  | AP3M2       | 3.79E-08 | 1.00E+00 | 3.18E-05   | 1.01E-09 | 0.0413052   | 2.41E-06    |
| phe.Fasting_rs6753834 | S8 | AAK1  | rs138136869 | S7  | DIAPH1      | 2.11E-05 | 1.00E+00 | 8.75E-03   | 2.44E-09 | 0.099364    | 5.28E-06    |
| phe.Fasting_rs6753834 | S8 | AAK1  | rs138457103 | S10 | DIAPH1      | 1.92E-05 | 1.00E+00 | 8.06E-03   | 1.00E-08 | 0.4075      | 1.86E-05    |
| phe.Fasting_rs6753834 | S8 | AAK1  | rs139403963 | S8  | DIAPH1      | 2.11E-05 | 1        | 0.00874719 | 2.44E-09 | 0.099364    | 5.28E-06    |
| phe.Fasting_rs6753834 | S8 | AAK1  | rs139828110 | S8  | DIAPH1      | 2.11E-05 | 1        | 0.00874719 | 2.44E-09 | 0.099364    | 5.28E-06    |
| phe.Fasting_rs6753834 | S8 | AAK1  | rs142789100 | S8  | DIAPH1      | 2.11E-05 | 1        | 0.00874719 | 2.44E-09 | 0.099364    | 5.28E-06    |
| phe.Fasting_rs6753834 | S8 | AAK1  | rs142812798 | S7  | DIAPH1      | 2.11E-05 | 1        | 0.00874719 | 2.44E-09 | 0.099364    | 5.28E-06    |
| phe.Fasting_rs6753834 | S8 | AAK1  | rs143377827 | S13 | "DIAPH1,LOC | 3.59E-06 | 1        | 0.00185741 | 1.44E-09 | 0.0586058   | 3.28E-06    |
| phe.Fasting_rs6753834 | S8 | AAK1  | rs143691978 | S11 | DIAPH1      | 2.11E-05 | 1.00E+00 | 8.75E-03   | 2.45E-09 | 0.099758    | 5.29E-06    |
| phe.Fasting_rs6753834 | S8 | AAK1  | rs144081334 | S11 | DIAPH1      | 2.11E-05 | 1.00E+00 | 8.75E-03   | 2.45E-09 | 0.099758    | 5.29E-06    |
| phe.Fasting_rs6753834 | S8 | AAK1  | rs145027704 | S11 | DIAPH1      | 2.11E-05 | 1.00E+00 | 8.75E-03   | 2.45E-09 | 0.099758    | 5.29E-06    |
| phe.Fasting_rs6753834 | S8 | AAK1  | rs146622060 | S13 | DIAPH1      | 2.11E-05 | 1.00E+00 | 8.75E-03   | 2.45E-09 | 0.099758    | 5.29E-06    |
| phe.Fasting_rs6753834 | S8 | AAK1  | rs147417996 | S7  | DIAPH1      | 2.11E-05 | 1        | 8.75E-03   | 2.45E-09 | 0.099758    | 5.29E-06    |
| phe.Fasting_rs6753834 | S8 | AAK1  | rs147677041 | S8  | DIAPH1      | 2.11E-05 | 1        | 0.00874719 | 2.44E-09 | 0.099364    | 5.28E-06    |
| phe.Fasting_rs6753834 | S8 | AAK1  | rs149019627 | S8  | DIAPH1      | 2.11E-05 | 1.00E+00 | 8.75E-03   | 2.44E-09 | 0.099364    | 5.28E-06    |
| phe.Fasting_rs6753834 | S8 | AAK1  | rs149791570 | S5  | DIAPH1      | 2.11E-05 | 1        | 0.00874719 | 2.44E-09 | 0.099364    | 5.28E-06    |
| phe.Fasting_rs6753834 | S8 | AAK1  | rs151330468 | S8  | DIAPH1      | 2.11E-05 | 1        | 8.75E-03   | 2.45E-09 | 0.099758    | 5.29E-06    |
| phe.Fasting_rs6753834 | S8 | AAK1  | rs182965141 | S8  | DIAPH1      | 2.31E-05 | 1.00E+00 | 9.45E-03   | 8.02E-10 | 0.0326295   | 1.96E-06    |
| phe.Fasting_rs6753834 | S8 | AAK1  | rs185502834 | S8  | DIAPH1      | 2.11E-05 | 1.00E+00 | 8.75E-03   | 2.44E-09 | 0.099364    | 5.28E-06    |
| phe.Fasting_rs6753834 | S8 | AAK1  | rs190559574 | S7  | DIAPH1      | 2.11E-05 | 1.00E+00 | 8.75E-03   | 2.44E-09 | 0.099364    | 5.28E-06    |
| phe.Fasting_rs6753834 | S8 | AAK1  | rs55900860  | S7  | DIAPH1      | 2.11E-05 | 1.00E+00 | 8.75E-03   | 2.44E-09 | 0.099364    | 5.28E-06    |
| phe.Fasting_rs6753834 | S8 | AAK1  | rs7004597   | S8  | NA          | 3.17E-08 | 1.00E+00 | 2.71E-05   | 3.12E-10 | 0.0127112   | 8.41E-07    |
| phe.Fasting_rs6753834 | S8 | AAK1  | rs78353402  | S8  | AP3M2       | 3.17E-08 | 1        | 2.71E-05   | 1.01E-09 | 0.0413052   | 2.41E-06    |
| phe.Fasting_rs6753834 | S8 | AAK1  | rs79517926  | S15 | "DIAPH1,LOC | 1.52E-05 | 1        | 6.57E-03   | 1.13E-11 | 0.000458886 | 4.14E-08    |
| phe.Fasting_rs6763396 | S5 | PHC3  | rs111576333 | S5  | TMEM64      | 2.24E-08 | 0.914277 | 1.96E-05   | 1.88E-10 | 0.00766889  | 5.37E-07    |
| phe.Fasting_rs6763396 | S5 | PHC3  | rs112091318 | S5  | TMEM64      | 6.76E-09 | 0.275951 | 6.51E-06   | 2.80E-10 | 0.0114072   | 7.67E-07    |
| phe.Fasting_rs6763396 | S5 | PHC3  | rs112348319 | S8  | SPTLC1      | 2.17E-05 | 1.00E+00 | 8.94E-03   | 8.05E-10 | 0.0327714   | 1.96E-06    |
| phe.Fasting_rs6763396 | S5 | PHC3  | rs112608164 | S8  | SPTLC1      | 2.17E-05 | 1        | 8.94E-03   | 8.05E-10 | 0.0327714   | 1.96E-06    |

|                       |     |       |                 |             |          |           |          |          |             |             |
|-----------------------|-----|-------|-----------------|-------------|----------|-----------|----------|----------|-------------|-------------|
| phe.Fasting_rs6763396 | S5  | PHC3  | rs113568654 S12 | SPTLC1      | 2.08E-05 | 1.00E+00  | 8.63E-03 | 1.06E-08 | 0.430778    | 1.95E-05    |
| phe.Fasting_rs6763396 | S5  | PHC3  | rs114565620 S8  | RCL1        | 2.86E-19 | 1.17E-11  | 2.40E-14 | 4.05E-07 | 1           | 0.000494219 |
| phe.Fasting_rs6763396 | S5  | PHC3  | rs115083290 S19 | NA          | 9.19E-08 | 1.00E+00  | 7.07E-05 | 3.44E-09 | 0.140185    | 7.19E-06    |
| phe.Fasting_rs6763396 | S5  | PHC3  | rs115752779 S19 | NA          | 9.19E-08 | 1.00E+00  | 7.07E-05 | 3.44E-09 | 0.140185    | 7.19E-06    |
| phe.Fasting_rs6763396 | S5  | PHC3  | rs115888477 S8  | NA          | 1.41E-06 | 1.00E+00  | 8.26E-04 | 8.10E-11 | 0.00329718  | 2.52E-07    |
| phe.Fasting_rs6763396 | S5  | PHC3  | rs116011837 S9  | BRD2        | 2.95E-13 | 1.21E-05  | 6.34E-10 | 2.12E-11 | 0.000864406 | 7.47E-08    |
| phe.Fasting_rs6763396 | S5  | PHC3  | rs116120727 S9  | BRD2        | 2.95E-13 | 1.21E-05  | 6.34E-10 | 2.12E-11 | 0.000864406 | 7.47E-08    |
| phe.Fasting_rs6763396 | S5  | PHC3  | rs116548615 S8  | TMEM45B     | 5.35E-19 | 2.19E-11  | 2.49E-14 | 6.44E-10 | 0.0262015   | 1.62E-06    |
| phe.Fasting_rs6763396 | S5  | PHC3  | rs11989304 S4   | TMEM64      | 2.24E-08 | 9.14E-01  | 1.96E-05 | 1.88E-10 | 0.00766324  | 5.37E-07    |
| phe.Fasting_rs6763396 | S5  | PHC3  | rs140524622 S7  | MRPL10      | 2.30E-08 | 9.38E-01  | 2.01E-05 | 2.21E-06 | 1           | 2.25E-03    |
| phe.Fasting_rs6763396 | S5  | PHC3  | rs141926074 S8  | ATE1        | 1.28E-19 | 5.21E-12  | 2.23E-14 | 1.38E-11 | 0.000562151 | 5.01E-08    |
| phe.Fasting_rs6763396 | S5  | PHC3  | rs73392640 S8   | POLR3B      | 7.04E-08 | 1         | 5.58E-05 | 9.07E-06 | 1           | 0.00754232  |
| phe.Fasting_rs6763396 | S5  | PHC3  | rs74627895 S8   | TMEM64      | 6.76E-09 | 2.76E-01  | 6.51E-06 | 1.03E-06 | 1           | 0.00115604  |
| phe.Fasting_rs6763396 | S5  | PHC3  | rs75350765 S5   | RCL1        | 2.86E-19 | 1.17E-11  | 2.40E-14 | 4.05E-07 | 1           | 4.94E-04    |
| phe.Fasting_rs6763396 | S5  | PHC3  | rs75506779 S5   | TMCO3       | 2.26E-09 | 9.22E-02  | 2.35E-06 | 2.99E-06 | 1           | 0.00292119  |
| phe.Fasting_rs6763396 | S5  | PHC3  | rs75949566 S5   | TMEM64      | 2.45E-08 | 1.00E+00  | 2.14E-05 | 3.27E-10 | 0.0133144   | 8.75E-07    |
| phe.Fasting_rs6763396 | S5  | PHC3  | rs76542405 S5   | SPTLC1      | 2.17E-05 | 1         | 8.94E-03 | 8.05E-10 | 0.0327714   | 1.96E-06    |
| phe.Fasting_rs6763396 | S5  | PHC3  | rs77523818 S7   | SPTLC1      | 2.17E-05 | 1         | 8.94E-03 | 8.05E-10 | 0.0327714   | 1.96E-06    |
| phe.Fasting_rs6763396 | S5  | PHC3  | rs7763107 S8    | FARS2       | 1.34E-09 | 0.054619  | 1.44E-06 | 2.47E-06 | 1           | 0.00247175  |
| phe.Fasting_rs6763396 | S5  | PHC3  | rs77845645 S21  | NA          | 1.05E-08 | 0.429322  | 9.75E-06 | 1.00E-12 | 4.08E-05    | 4.74E-09    |
| phe.Fasting_rs6763396 | S5  | PHC3  | rs78990344 S2   | LOC1005063  | 2.24E-08 | 0.914277  | 1.96E-05 | 1.88E-10 | 0.00766324  | 5.37E-07    |
| phe.Fasting_rs6767687 | S10 | VGLL4 | rs112027720 S7  | DIAPH1      | 3.64E-09 | 0.148469  | 3.64E-06 | 8.99E-10 | 0.036585    | 2.15E-06    |
| phe.Fasting_rs6767687 | S10 | VGLL4 | rs113219478 S7  | DIAPH1      | 3.64E-09 | 0.148469  | 3.64E-06 | 8.99E-10 | 0.036585    | 2.15E-06    |
| phe.Fasting_rs6767687 | S10 | VGLL4 | rs115083290 S19 | NA          | 1.04E-05 | 1         | 4.72E-03 | 1.40E-10 | 0.00569301  | 4.20E-07    |
| phe.Fasting_rs6767687 | S10 | VGLL4 | rs115752779 S19 | NA          | 1.04E-05 | 1         | 4.72E-03 | 1.40E-10 | 0.00569301  | 4.20E-07    |
| phe.Fasting_rs6767687 | S10 | VGLL4 | rs115888477 S8  | NA          | 8.13E-08 | 1         | 6.32E-05 | 6.41E-06 | 1           | 0.00563254  |
| phe.Fasting_rs6767687 | S10 | VGLL4 | rs116279995 S20 | "PCDHGA4, P | 1.07E-08 | 0.438137  | 9.94E-06 | 5.13E-10 | 0.0208944   | 1.33E-06    |
| phe.Fasting_rs6767687 | S10 | VGLL4 | rs138136869 S7  | DIAPH1      | 7.69E-08 | 1.00E+00  | 6.01E-05 | 7.50E-06 | 1           | 6.42E-03    |
| phe.Fasting_rs6767687 | S10 | VGLL4 | rs138457103 S10 | DIAPH1      | 6.14E-08 | 1.00E+00  | 4.94E-05 | 2.30E-09 | 0.0935667   | 5.00E-06    |
| phe.Fasting_rs6767687 | S10 | VGLL4 | rs138487229 S11 | DIAPH1      | 3.64E-09 | 1.48E-01  | 3.64E-06 | 8.99E-10 | 0.036585    | 2.15E-06    |
| phe.Fasting_rs6767687 | S10 | VGLL4 | rs138738950 S8  | "PCDHGB2, P | 3.64E-09 | 1.48E-01  | 3.64E-06 | 9.05E-10 | 0.0368315   | 2.16E-06    |
| phe.Fasting_rs6767687 | S10 | VGLL4 | rs139297927 S8  | DIAPH1      | 3.64E-09 | 0.148469  | 3.64E-06 | 8.99E-10 | 0.036585    | 2.15E-06    |
| phe.Fasting_rs6767687 | S10 | VGLL4 | rs139337303 S8  | DIAPH1      | 3.64E-09 | 0.148469  | 3.64E-06 | 8.99E-10 | 0.036585    | 2.15E-06    |
| phe.Fasting_rs6767687 | S10 | VGLL4 | rs139403963 S8  | DIAPH1      | 7.69E-08 | 1         | 6.01E-05 | 7.50E-06 | 1           | 0.0064177   |
| phe.Fasting_rs6767687 | S10 | VGLL4 | rs139621309 S18 | "LOC100505  | 3.64E-09 | 0.148469  | 3.64E-06 | 8.99E-10 | 0.036585    | 2.15E-06    |
| phe.Fasting_rs6767687 | S10 | VGLL4 | rs139828110 S8  | DIAPH1      | 7.69E-08 | 1         | 6.01E-05 | 7.50E-06 | 1           | 0.0064177   |
| phe.Fasting_rs6767687 | S10 | VGLL4 | rs140070363 S8  | DIAPH1      | 3.64E-09 | 0.148469  | 3.64E-06 | 8.99E-10 | 0.036585    | 2.15E-06    |
| phe.Fasting_rs6767687 | S10 | VGLL4 | rs140524622 S7  | MRPL10      | 2.33E-09 | 0.0951658 | 2.42E-06 | 6.56E-06 | 1           | 0.00574338  |
| phe.Fasting_rs6767687 | S10 | VGLL4 | rs140644750 S13 | DIAPH1      | 3.64E-09 | 0.148469  | 3.64E-06 | 8.99E-10 | 0.036585    | 2.15E-06    |
| phe.Fasting_rs6767687 | S10 | VGLL4 | rs141022544 S8  | DIAPH1      | 3.64E-09 | 0.148469  | 3.64E-06 | 8.99E-10 | 0.036585    | 2.15E-06    |

|                       |     |       |                |             |          |            |          |          |           |            |
|-----------------------|-----|-------|----------------|-------------|----------|------------|----------|----------|-----------|------------|
| phe.Fasting_rs6767687 | S10 | VGLL4 | rs141525984S5  | DIAPH1      | 3.64E-09 | 0.148469   | 3.64E-06 | 8.99E-10 | 0.036585  | 2.15E-06   |
| phe.Fasting_rs6767687 | S10 | VGLL4 | rs141692339S3  | "PCDHGA6,Pi | 3.69E-10 | 0.0150824  | 4.32E-07 | 7.78E-10 | 0.0316579 | 1.92E-06   |
| phe.Fasting_rs6767687 | S10 | VGLL4 | rs141926074S8  | ATE1        | 1.12E-09 | 0.0458797  | 1.22E-06 | 1.85E-12 | 7.52E-05  | 8.08E-09   |
| phe.Fasting_rs6767687 | S10 | VGLL4 | rs142480565S8  | DIAPH1      | 3.64E-09 | 0.148469   | 3.64E-06 | 8.99E-10 | 0.036585  | 2.15E-06   |
| phe.Fasting_rs6767687 | S10 | VGLL4 | rs142718558S7  | "DIAPH1,LOC | 3.64E-09 | 0.148469   | 3.64E-06 | 8.99E-10 | 0.036585  | 2.15E-06   |
| phe.Fasting_rs6767687 | S10 | VGLL4 | rs142789100S8  | DIAPH1      | 7.69E-08 | 1          | 6.01E-05 | 7.50E-06 | 1         | 0.0064177  |
| phe.Fasting_rs6767687 | S10 | VGLL4 | rs142812798S7  | DIAPH1      | 7.69E-08 | 1          | 6.01E-05 | 7.50E-06 | 1         | 6.42E-03   |
| phe.Fasting_rs6767687 | S10 | VGLL4 | rs143377827S13 | "DIAPH1,LOC | 5.85E-08 | 1          | 4.72E-05 | 2.56E-06 | 1         | 0.0025482  |
| phe.Fasting_rs6767687 | S10 | VGLL4 | rs143691978S11 | DIAPH1      | 7.69E-08 | 1          | 6.01E-05 | 6.84E-06 | 1         | 5.95E-03   |
| phe.Fasting_rs6767687 | S10 | VGLL4 | rs144081334S11 | DIAPH1      | 7.69E-08 | 1          | 6.01E-05 | 6.84E-06 | 1         | 0.00595226 |
| phe.Fasting_rs6767687 | S10 | VGLL4 | rs144613910S8  | DIAPH1      | 3.64E-09 | 0.148469   | 3.64E-06 | 8.99E-10 | 0.036585  | 2.15E-06   |
| phe.Fasting_rs6767687 | S10 | VGLL4 | rs145027704S11 | DIAPH1      | 7.69E-08 | 1          | 6.01E-05 | 6.84E-06 | 1         | 0.00595226 |
| phe.Fasting_rs6767687 | S10 | VGLL4 | rs146220673S7  | DIAPH1      | 3.64E-09 | 0.148469   | 3.64E-06 | 8.99E-10 | 0.036585  | 2.15E-06   |
| phe.Fasting_rs6767687 | S10 | VGLL4 | rs146622060S13 | DIAPH1      | 7.69E-08 | 1          | 6.01E-05 | 6.84E-06 | 1         | 0.00595226 |
| phe.Fasting_rs6767687 | S10 | VGLL4 | rs146878162S7  | DIAPH1      | 3.64E-09 | 0.148469   | 3.64E-06 | 8.99E-10 | 0.036585  | 2.15E-06   |
| phe.Fasting_rs6767687 | S10 | VGLL4 | rs147314451S8  | DIAPH1      | 3.64E-09 | 0.148469   | 3.64E-06 | 8.99E-10 | 0.036585  | 2.15E-06   |
| phe.Fasting_rs6767687 | S10 | VGLL4 | rs147417996S7  | DIAPH1      | 7.69E-08 | 1          | 6.01E-05 | 6.84E-06 | 1         | 0.00595226 |
| phe.Fasting_rs6767687 | S10 | VGLL4 | rs147506725S21 | "PCDHGA1,Pi | 1.07E-08 | 0.438137   | 9.94E-06 | 5.13E-10 | 0.0208944 | 1.33E-06   |
| phe.Fasting_rs6767687 | S10 | VGLL4 | rs147646948S7  | "LOC1005050 | 3.64E-09 | 0.148469   | 3.64E-06 | 8.99E-10 | 0.036585  | 2.15E-06   |
| phe.Fasting_rs6767687 | S10 | VGLL4 | rs147677041S8  | DIAPH1      | 7.69E-08 | 1          | 6.01E-05 | 7.50E-06 | 1         | 0.0064177  |
| phe.Fasting_rs6767687 | S10 | VGLL4 | rs148116628S7  | DIAPH1      | 3.64E-09 | 0.148469   | 3.64E-06 | 8.99E-10 | 0.036585  | 2.15E-06   |
| phe.Fasting_rs6767687 | S10 | VGLL4 | rs148423011S7  | DIAPH1      | 3.64E-09 | 0.148469   | 3.64E-06 | 8.99E-10 | 0.036585  | 2.15E-06   |
| phe.Fasting_rs6767687 | S10 | VGLL4 | rs149019627S8  | DIAPH1      | 7.69E-08 | 1          | 6.01E-05 | 7.50E-06 | 1         | 0.0064177  |
| phe.Fasting_rs6767687 | S10 | VGLL4 | rs149075406S8  | DIAPH1      | 3.64E-09 | 0.148469   | 3.64E-06 | 8.99E-10 | 0.036585  | 2.15E-06   |
| phe.Fasting_rs6767687 | S10 | VGLL4 | rs149334783S8  | DIAPH1      | 3.64E-09 | 0.148469   | 3.64E-06 | 8.99E-10 | 0.036585  | 2.15E-06   |
| phe.Fasting_rs6767687 | S10 | VGLL4 | rs149553852S21 | "PCDHGA10,I | 1.07E-08 | 0.438137   | 9.94E-06 | 5.13E-10 | 0.0208944 | 1.33E-06   |
| phe.Fasting_rs6767687 | S10 | VGLL4 | rs149716949S5  | DIAPH1      | 1.65E-10 | 0.00674346 | 2.06E-07 | 1.62E-09 | 0.0657984 | 3.65E-06   |
| phe.Fasting_rs6767687 | S10 | VGLL4 | rs149791570S5  | DIAPH1      | 7.69E-08 | 1          | 6.01E-05 | 7.50E-06 | 1         | 0.0064177  |
| phe.Fasting_rs6767687 | S10 | VGLL4 | rs150452206S13 | "DIAPH1,LOC | 3.64E-09 | 0.148469   | 3.64E-06 | 8.99E-10 | 0.036585  | 2.15E-06   |
| phe.Fasting_rs6767687 | S10 | VGLL4 | rs150675915S7  | DIAPH1      | 3.64E-09 | 0.148469   | 3.64E-06 | 8.99E-10 | 0.036585  | 2.15E-06   |
| phe.Fasting_rs6767687 | S10 | VGLL4 | rs150765570S7  | DIAPH1      | 3.64E-09 | 0.148469   | 3.64E-06 | 8.99E-10 | 0.036585  | 2.15E-06   |
| phe.Fasting_rs6767687 | S10 | VGLL4 | rs150992994S11 | "PCDHGA5,Pi | 3.70E-09 | 0.151133   | 3.70E-06 | 8.47E-10 | 0.0344957 | 2.05E-06   |
| phe.Fasting_rs6767687 | S10 | VGLL4 | rs151204700S8  | DIAPH1      | 3.64E-09 | 0.148469   | 3.64E-06 | 8.99E-10 | 0.036585  | 2.15E-06   |
| phe.Fasting_rs6767687 | S10 | VGLL4 | rs151330468S8  | DIAPH1      | 7.69E-08 | 1          | 6.01E-05 | 6.84E-06 | 1         | 0.00595226 |
| phe.Fasting_rs6767687 | S10 | VGLL4 | rs180772028S8  | "DIAPH1,LOC | 3.64E-09 | 1.48E-01   | 3.64E-06 | 8.99E-10 | 0.036585  | 2.15E-06   |
| phe.Fasting_rs6767687 | S10 | VGLL4 | rs181224861S7  | DIAPH1      | 3.64E-09 | 0.148469   | 3.64E-06 | 8.99E-10 | 0.036585  | 2.15E-06   |
| phe.Fasting_rs6767687 | S10 | VGLL4 | rs181247960S21 | "PCDHGA9,Pi | 1.07E-08 | 0.438137   | 9.94E-06 | 5.13E-10 | 0.0208944 | 1.33E-06   |
| phe.Fasting_rs6767687 | S10 | VGLL4 | rs181824655S21 | "PCDHGB6,Pi | 1.07E-08 | 0.438137   | 9.94E-06 | 5.13E-10 | 0.0208944 | 1.33E-06   |
| phe.Fasting_rs6767687 | S10 | VGLL4 | rs182714699S8  | DIAPH1      | 3.64E-09 | 1.48E-01   | 3.64E-06 | 8.99E-10 | 0.036585  | 2.15E-06   |
| phe.Fasting_rs6767687 | S10 | VGLL4 | rs182965141S8  | DIAPH1      | 8.49E-08 | 1.00E+00   | 6.58E-05 | 1.21E-05 | 1         | 0.00946912 |

|                       |     |        |                |             |          |             |             |          |           |             |
|-----------------------|-----|--------|----------------|-------------|----------|-------------|-------------|----------|-----------|-------------|
| phe.Fasting_rs6767687 | S10 | VGLL4  | rs183597049S7  | DIAPH1      | 3.64E-09 | 0.148469    | 3.64E-06    | 8.99E-10 | 0.036585  | 2.15E-06    |
| phe.Fasting_rs6767687 | S10 | VGLL4  | rs183980988S2  | NA          | 3.64E-09 | 1.48E-01    | 3.64E-06    | 8.99E-10 | 0.036585  | 2.15E-06    |
| phe.Fasting_rs6767687 | S10 | VGLL4  | rs184233232S7  | DIAPH1      | 3.64E-09 | 0.148469    | 3.64E-06    | 8.99E-10 | 0.036585  | 2.15E-06    |
| phe.Fasting_rs6767687 | S10 | VGLL4  | rs184509477S13 | "PCDHGB4,PI | 3.64E-09 | 0.148469    | 3.64E-06    | 8.99E-10 | 0.036585  | 2.15E-06    |
| phe.Fasting_rs6767687 | S10 | VGLL4  | rs185069296S15 | "LOC1005056 | 3.64E-09 | 0.148469    | 3.64E-06    | 8.99E-10 | 0.036585  | 2.15E-06    |
| phe.Fasting_rs6767687 | S10 | VGLL4  | rs185502834S8  | DIAPH1      | 7.69E-08 | 1.00E+00    | 6.01E-05    | 7.50E-06 | 1         | 0.0064177   |
| phe.Fasting_rs6767687 | S10 | VGLL4  | rs185759881S7  | DIAPH1      | 3.64E-09 | 1.48E-01    | 3.64E-06    | 8.99E-10 | 0.036585  | 2.15E-06    |
| phe.Fasting_rs6767687 | S10 | VGLL4  | rs186288044S21 | "PCDHGB4,PI | 1.07E-08 | 0.438137    | 9.94E-06    | 5.13E-10 | 0.0208944 | 1.33E-06    |
| phe.Fasting_rs6767687 | S10 | VGLL4  | rs187000011S11 | DIAPH1      | 3.64E-09 | 0.148469    | 3.64E-06    | 8.99E-10 | 0.036585  | 2.15E-06    |
| phe.Fasting_rs6767687 | S10 | VGLL4  | rs188981295S5  | "RPS27AP10, | 3.64E-09 | 1.48E-01    | 3.64E-06    | 8.99E-10 | 0.036585  | 2.15E-06    |
| phe.Fasting_rs6767687 | S10 | VGLL4  | rs190559574S7  | DIAPH1      | 7.69E-08 | 1           | 6.01E-05    | 7.50E-06 | 1         | 0.0064177   |
| phe.Fasting_rs6767687 | S10 | VGLL4  | rs191544043S8  | DIAPH1      | 3.64E-09 | 0.148469    | 3.64E-06    | 8.99E-10 | 0.036585  | 2.15E-06    |
| phe.Fasting_rs6767687 | S10 | VGLL4  | rs191766712S7  | DIAPH1      | 3.64E-09 | 0.148469    | 3.64E-06    | 8.99E-10 | 0.036585  | 2.15E-06    |
| phe.Fasting_rs6767687 | S10 | VGLL4  | rs192690040S7  | DIAPH1      | 3.64E-09 | 0.148469    | 3.64E-06    | 8.99E-10 | 0.036585  | 2.15E-06    |
| phe.Fasting_rs6767687 | S10 | VGLL4  | rs192765219S7  | DIAPH1      | 3.64E-09 | 0.148469    | 3.64E-06    | 8.99E-10 | 0.036585  | 2.15E-06    |
| phe.Fasting_rs6767687 | S10 | VGLL4  | rs192770525S7  | DIAPH1      | 3.64E-09 | 0.148469    | 3.64E-06    | 8.99E-10 | 0.036585  | 2.15E-06    |
| phe.Fasting_rs6767687 | S10 | VGLL4  | rs35990401 S7  | DIAPH1      | 3.63E-09 | 0.14834     | 3.64E-06    | 3.30E-09 | 0.134488  | 6.94E-06    |
| phe.Fasting_rs6767687 | S10 | VGLL4  | rs55900860 S7  | DIAPH1      | 7.69E-08 | 1.00E+00    | 6.01E-05    | 7.50E-06 | 1         | 0.0064177   |
| phe.Fasting_rs6767687 | S10 | VGLL4  | rs57503635 S3  | NA          | 5.26E-09 | 0.214867    | 5.13E-06    | 1.65E-12 | 6.71E-05  | 7.33E-09    |
| phe.Fasting_rs6767687 | S10 | VGLL4  | rs60011869 S16 | NA          | 9.80E-06 | 1.00E+00    | 4.49E-03    | 5.04E-08 | 1         | 7.74E-05    |
| phe.Fasting_rs6767687 | S10 | VGLL4  | rs7256517 S7   | CYTH2       | 3.01E-09 | 0.123043    | 3.07E-06    | 4.53E-07 | 1         | 0.000545768 |
| phe.Fasting_rs6767687 | S10 | VGLL4  | rs73283603 S7  | ZWINT       | 7.55E-06 | 1.00E+00    | 3.58E-03    | 1.42E-07 | 1         | 0.000194056 |
| phe.Fasting_rs6767687 | S10 | VGLL4  | rs75949566 S5  | TMEM64      | 1.54E-11 | 0.000628632 | 2.36E-08    | 1.71E-06 | 1         | 0.00180159  |
| phe.Fasting_rs6767687 | S10 | VGLL4  | rs79517926 S15 | "DIAPH1,LOC | 8.11E-09 | 0.331132    | 7.71E-06    | 8.62E-07 | 1         | 0.000986589 |
| phe.Fasting_rs6780327 | S8  | FANCD2 | rs112027720S7  | DIAPH1      | 4.36E-07 | 1.00E+00    | 2.89E-04    | 1.62E-06 | 1         | 0.00171838  |
| phe.Fasting_rs6780327 | S8  | FANCD2 | rs113219478S7  | DIAPH1      | 4.36E-07 | 1           | 0.000289116 | 1.62E-06 | 1         | 0.00171838  |
| phe.Fasting_rs6780327 | S8  | FANCD2 | rs116279995S20 | "PCDHGA4,PI | 6.20E-07 | 1           | 0.000397692 | 3.53E-06 | 1         | 0.00337922  |
| phe.Fasting_rs6780327 | S8  | FANCD2 | rs138090701S5  | HDAC3       | 9.73E-07 | 1           | 0.000591548 | 5.73E-06 | 1         | 0.00512168  |
| phe.Fasting_rs6780327 | S8  | FANCD2 | rs138136869S7  | DIAPH1      | 7.49E-08 | 1           | 5.87E-05    | 2.85E-07 | 1         | 0.000361911 |
| phe.Fasting_rs6780327 | S8  | FANCD2 | rs138457103S10 | DIAPH1      | 2.44E-07 | 1           | 0.00017071  | 1.37E-06 | 1         | 0.00149224  |
| phe.Fasting_rs6780327 | S8  | FANCD2 | rs138487229S11 | DIAPH1      | 4.36E-07 | 1           | 0.000289116 | 1.62E-06 | 1         | 0.00171838  |
| phe.Fasting_rs6780327 | S8  | FANCD2 | rs138738950S8  | "PCDHGB2,PI | 4.36E-07 | 1           | 0.000289116 | 1.61E-06 | 1         | 0.0017121   |
| phe.Fasting_rs6780327 | S8  | FANCD2 | rs139297927S8  | DIAPH1      | 4.36E-07 | 1           | 0.000289116 | 1.62E-06 | 1         | 0.00171838  |
| phe.Fasting_rs6780327 | S8  | FANCD2 | rs139337303S8  | DIAPH1      | 4.36E-07 | 1           | 0.000289116 | 1.62E-06 | 1         | 0.00171838  |
| phe.Fasting_rs6780327 | S8  | FANCD2 | rs139403963S8  | DIAPH1      | 7.49E-08 | 1           | 5.87E-05    | 2.85E-07 | 1         | 0.000361911 |
| phe.Fasting_rs6780327 | S8  | FANCD2 | rs139621309S18 | "LOC1005056 | 4.36E-07 | 1           | 0.000289116 | 1.62E-06 | 1         | 0.00171838  |
| phe.Fasting_rs6780327 | S8  | FANCD2 | rs139828110S8  | DIAPH1      | 7.49E-08 | 1           | 5.87E-05    | 2.85E-07 | 1         | 0.000361911 |
| phe.Fasting_rs6780327 | S8  | FANCD2 | rs140070363S8  | DIAPH1      | 4.36E-07 | 1           | 0.000289116 | 1.62E-06 | 1         | 0.00171838  |
| phe.Fasting_rs6780327 | S8  | FANCD2 | rs140644750S13 | DIAPH1      | 4.36E-07 | 1           | 0.000289116 | 1.62E-06 | 1         | 0.00171838  |
| phe.Fasting_rs6780327 | S8  | FANCD2 | rs141022544S8  | DIAPH1      | 4.36E-07 | 1           | 0.000289116 | 1.62E-06 | 1         | 0.00171838  |

|                       |    |        |                |             |          |   |             |          |   |             |
|-----------------------|----|--------|----------------|-------------|----------|---|-------------|----------|---|-------------|
| phe.Fasting_rs6780327 | S8 | FANCD2 | rs141525984S5  | DIAPH1      | 4.36E-07 | 1 | 0.000289116 | 1.62E-06 | 1 | 0.00171838  |
| phe.Fasting_rs6780327 | S8 | FANCD2 | rs141692339S3  | "PCDHGA6,Pi | 8.21E-07 | 1 | 0.000508152 | 5.19E-06 | 1 | 0.00472329  |
| phe.Fasting_rs6780327 | S8 | FANCD2 | rs141926074S8  | ATE1        | 2.88E-07 | 1 | 0.000199324 | 2.16E-06 | 1 | 0.00221082  |
| phe.Fasting_rs6780327 | S8 | FANCD2 | rs142480565S8  | DIAPH1      | 4.36E-07 | 1 | 0.000289116 | 1.62E-06 | 1 | 0.00171838  |
| phe.Fasting_rs6780327 | S8 | FANCD2 | rs142718558S7  | "DIAPH1,LOC | 4.36E-07 | 1 | 0.000289116 | 1.62E-06 | 1 | 0.00171838  |
| phe.Fasting_rs6780327 | S8 | FANCD2 | rs142789100S8  | DIAPH1      | 7.49E-08 | 1 | 5.87E-05    | 2.85E-07 | 1 | 0.000361911 |
| phe.Fasting_rs6780327 | S8 | FANCD2 | rs142812798S7  | DIAPH1      | 7.49E-08 | 1 | 5.87E-05    | 2.85E-07 | 1 | 0.000361911 |
| phe.Fasting_rs6780327 | S8 | FANCD2 | rs143377827S13 | "DIAPH1,LOC | 8.22E-08 | 1 | 6.39E-05    | 2.35E-07 | 1 | 0.000304848 |
| phe.Fasting_rs6780327 | S8 | FANCD2 | rs143691978S11 | DIAPH1      | 7.49E-08 | 1 | 5.87E-05    | 2.97E-07 | 1 | 0.000375916 |
| phe.Fasting_rs6780327 | S8 | FANCD2 | rs144081334S11 | DIAPH1      | 7.49E-08 | 1 | 5.87E-05    | 2.97E-07 | 1 | 0.000375916 |
| phe.Fasting_rs6780327 | S8 | FANCD2 | rs144613910S8  | DIAPH1      | 4.36E-07 | 1 | 0.000289116 | 1.62E-06 | 1 | 0.00171838  |
| phe.Fasting_rs6780327 | S8 | FANCD2 | rs145027704S11 | DIAPH1      | 7.49E-08 | 1 | 5.87E-05    | 2.97E-07 | 1 | 0.000375916 |
| phe.Fasting_rs6780327 | S8 | FANCD2 | rs146220673S7  | DIAPH1      | 4.36E-07 | 1 | 0.000289116 | 1.62E-06 | 1 | 0.00171838  |
| phe.Fasting_rs6780327 | S8 | FANCD2 | rs146622060S13 | DIAPH1      | 7.49E-08 | 1 | 5.87E-05    | 2.97E-07 | 1 | 0.000375916 |
| phe.Fasting_rs6780327 | S8 | FANCD2 | rs146878162S7  | DIAPH1      | 4.36E-07 | 1 | 0.000289116 | 1.62E-06 | 1 | 0.00171838  |
| phe.Fasting_rs6780327 | S8 | FANCD2 | rs147314451S8  | DIAPH1      | 4.36E-07 | 1 | 0.000289116 | 1.62E-06 | 1 | 0.00171838  |
| phe.Fasting_rs6780327 | S8 | FANCD2 | rs147417996S7  | DIAPH1      | 7.49E-08 | 1 | 5.87E-05    | 2.97E-07 | 1 | 0.000375916 |
| phe.Fasting_rs6780327 | S8 | FANCD2 | rs147506725S21 | "PCDHGA1,Pi | 6.20E-07 | 1 | 0.000397692 | 3.53E-06 | 1 | 0.00337922  |
| phe.Fasting_rs6780327 | S8 | FANCD2 | rs147646948S7  | "LOC1005056 | 4.36E-07 | 1 | 0.000289116 | 1.62E-06 | 1 | 0.00171838  |
| phe.Fasting_rs6780327 | S8 | FANCD2 | rs147677041S8  | DIAPH1      | 7.49E-08 | 1 | 5.87E-05    | 2.85E-07 | 1 | 0.000361911 |
| phe.Fasting_rs6780327 | S8 | FANCD2 | rs148116628S7  | DIAPH1      | 4.36E-07 | 1 | 0.000289116 | 1.62E-06 | 1 | 0.00171838  |
| phe.Fasting_rs6780327 | S8 | FANCD2 | rs148423011S7  | DIAPH1      | 4.36E-07 | 1 | 0.000289116 | 1.62E-06 | 1 | 0.00171838  |
| phe.Fasting_rs6780327 | S8 | FANCD2 | rs149019627S8  | DIAPH1      | 7.49E-08 | 1 | 5.87E-05    | 2.85E-07 | 1 | 0.000361911 |
| phe.Fasting_rs6780327 | S8 | FANCD2 | rs149075406S8  | DIAPH1      | 4.36E-07 | 1 | 0.000289116 | 1.62E-06 | 1 | 0.00171838  |
| phe.Fasting_rs6780327 | S8 | FANCD2 | rs149334783S8  | DIAPH1      | 4.36E-07 | 1 | 0.000289116 | 1.62E-06 | 1 | 0.00171838  |
| phe.Fasting_rs6780327 | S8 | FANCD2 | rs149553852S21 | "PCDHGA10,I | 6.20E-07 | 1 | 0.000397692 | 3.53E-06 | 1 | 0.00337922  |
| phe.Fasting_rs6780327 | S8 | FANCD2 | rs149716949S5  | DIAPH1      | 4.70E-08 | 1 | 3.87E-05    | 3.17E-07 | 1 | 0.000398509 |
| phe.Fasting_rs6780327 | S8 | FANCD2 | rs149791570S5  | DIAPH1      | 7.49E-08 | 1 | 5.87E-05    | 2.85E-07 | 1 | 0.000361911 |
| phe.Fasting_rs6780327 | S8 | FANCD2 | rs150452206S13 | "DIAPH1,LOC | 4.36E-07 | 1 | 0.000289116 | 1.62E-06 | 1 | 0.00171838  |
| phe.Fasting_rs6780327 | S8 | FANCD2 | rs150675915S7  | DIAPH1      | 4.36E-07 | 1 | 0.000289116 | 1.62E-06 | 1 | 0.00171838  |
| phe.Fasting_rs6780327 | S8 | FANCD2 | rs150765570S7  | DIAPH1      | 4.36E-07 | 1 | 0.000289116 | 1.62E-06 | 1 | 0.00171838  |
| phe.Fasting_rs6780327 | S8 | FANCD2 | rs150992994S11 | "PCDHGA5,Pi | 4.50E-07 | 1 | 0.000297756 | 1.56E-06 | 1 | 0.00166348  |
| phe.Fasting_rs6780327 | S8 | FANCD2 | rs151204700S8  | DIAPH1      | 4.36E-07 | 1 | 0.000289116 | 1.62E-06 | 1 | 0.00171838  |
| phe.Fasting_rs6780327 | S8 | FANCD2 | rs151330468S8  | DIAPH1      | 7.49E-08 | 1 | 5.87E-05    | 2.97E-07 | 1 | 0.000375916 |
| phe.Fasting_rs6780327 | S8 | FANCD2 | rs180772028S8  | "DIAPH1,LOC | 4.36E-07 | 1 | 0.000289116 | 1.62E-06 | 1 | 0.00171838  |
| phe.Fasting_rs6780327 | S8 | FANCD2 | rs181224861S7  | DIAPH1      | 4.36E-07 | 1 | 0.000289116 | 1.62E-06 | 1 | 0.00171838  |
| phe.Fasting_rs6780327 | S8 | FANCD2 | rs181247960S21 | "PCDHGA9,Pi | 6.20E-07 | 1 | 0.000397692 | 3.53E-06 | 1 | 0.00337922  |
| phe.Fasting_rs6780327 | S8 | FANCD2 | rs181824655S21 | "PCDHGB6,Pi | 6.20E-07 | 1 | 0.000397692 | 3.53E-06 | 1 | 0.00337922  |
| phe.Fasting_rs6780327 | S8 | FANCD2 | rs182714699S8  | DIAPH1      | 4.36E-07 | 1 | 0.000289116 | 1.62E-06 | 1 | 0.00171838  |
| phe.Fasting_rs6780327 | S8 | FANCD2 | rs182958142S8  | DIAPH1      | 2.15E-07 | 1 | 0.0001523   | 5.72E-06 | 1 | 0.00511188  |

|                       |    |        |             |     |             |          |          |             |          |             |             |
|-----------------------|----|--------|-------------|-----|-------------|----------|----------|-------------|----------|-------------|-------------|
| phe.Fasting_rs6780327 | S8 | FANCD2 | rs182965141 | S8  | DIAPH1      | 8.44E-08 | 1        | 6.55E-05    | 3.00E-06 | 1           | 0.00292277  |
| phe.Fasting_rs6780327 | S8 | FANCD2 | rs183597049 | S7  | DIAPH1      | 4.36E-07 | 1        | 0.000289116 | 1.62E-06 | 1           | 0.00171838  |
| phe.Fasting_rs6780327 | S8 | FANCD2 | rs183980988 | S2  | NA          | 4.36E-07 | 1        | 0.000289116 | 1.62E-06 | 1           | 0.00171838  |
| phe.Fasting_rs6780327 | S8 | FANCD2 | rs184233232 | S7  | DIAPH1      | 4.36E-07 | 1        | 0.000289116 | 1.62E-06 | 1           | 0.00171838  |
| phe.Fasting_rs6780327 | S8 | FANCD2 | rs184509477 | S13 | "PCDHGB4,PI | 4.36E-07 | 1        | 0.000289116 | 1.62E-06 | 1           | 0.00171838  |
| phe.Fasting_rs6780327 | S8 | FANCD2 | rs185069296 | S15 | "LOC1005056 | 4.36E-07 | 1        | 0.000289116 | 1.62E-06 | 1           | 0.00171838  |
| phe.Fasting_rs6780327 | S8 | FANCD2 | rs185502834 | S8  | DIAPH1      | 7.49E-08 | 1        | 5.87E-05    | 2.85E-07 | 1           | 0.000361911 |
| phe.Fasting_rs6780327 | S8 | FANCD2 | rs185759881 | S7  | DIAPH1      | 4.36E-07 | 1        | 0.000289116 | 1.62E-06 | 1           | 0.00171838  |
| phe.Fasting_rs6780327 | S8 | FANCD2 | rs186288044 | S21 | "PCDHGB4,PI | 6.20E-07 | 1        | 0.000397692 | 3.53E-06 | 1           | 0.00337922  |
| phe.Fasting_rs6780327 | S8 | FANCD2 | rs187000011 | S11 | DIAPH1      | 4.36E-07 | 1        | 0.000289116 | 1.62E-06 | 1           | 0.00171838  |
| phe.Fasting_rs6780327 | S8 | FANCD2 | rs188981295 | S5  | "RPS27AP10, | 4.36E-07 | 1        | 0.000289116 | 1.62E-06 | 1           | 0.00171838  |
| phe.Fasting_rs6780327 | S8 | FANCD2 | rs190559574 | S7  | DIAPH1      | 7.49E-08 | 1        | 5.87E-05    | 2.85E-07 | 1           | 0.000361911 |
| phe.Fasting_rs6780327 | S8 | FANCD2 | rs191544043 | S8  | DIAPH1      | 4.36E-07 | 1        | 0.000289116 | 1.62E-06 | 1           | 0.00171838  |
| phe.Fasting_rs6780327 | S8 | FANCD2 | rs191766712 | S7  | DIAPH1      | 4.36E-07 | 1        | 0.000289116 | 1.62E-06 | 1           | 0.00171838  |
| phe.Fasting_rs6780327 | S8 | FANCD2 | rs192690040 | S7  | DIAPH1      | 4.36E-07 | 1        | 0.000289116 | 1.62E-06 | 1           | 0.00171838  |
| phe.Fasting_rs6780327 | S8 | FANCD2 | rs192765219 | S7  | DIAPH1      | 4.36E-07 | 1        | 0.000289116 | 1.62E-06 | 1           | 0.00171838  |
| phe.Fasting_rs6780327 | S8 | FANCD2 | rs192770525 | S7  | DIAPH1      | 4.36E-07 | 1        | 0.000289116 | 1.62E-06 | 1           | 0.00171838  |
| phe.Fasting_rs6780327 | S8 | FANCD2 | rs35990401  | S7  | DIAPH1      | 3.35E-07 | 1        | 2.30E-04    | 5.65E-07 | 1           | 6.69E-04    |
| phe.Fasting_rs6780327 | S8 | FANCD2 | rs3856797   | S12 | VGLL4       | 1.22E-05 | 1.00E+00 | 5.41E-03    | 6.19E-07 | 1           | 0.000728414 |
| phe.Fasting_rs6780327 | S8 | FANCD2 | rs55900860  | S7  | DIAPH1      | 7.49E-08 | 1.00E+00 | 5.87E-05    | 2.85E-07 | 1           | 0.000361911 |
| phe.Fasting_rs6780327 | S8 | FANCD2 | rs57503635  | S3  | NA          | 3.60E-09 | 0.147212 | 3.63E-06    | 4.64E-17 | 1.89E-09    | 3.64E-12    |
| phe.Fasting_rs6780327 | S8 | FANCD2 | rs79517926  | S15 | "DIAPH1,LOC | 1.06E-07 | 1        | 8.00E-05    | 2.93E-06 | 1           | 0.00287018  |
| phe.Fasting_rs6781454 | S8 | PHC3   | rs111576333 | S5  | TMEM64      | 2.10E-08 | 8.59E-01 | 1.85E-05    | 1.86E-10 | 0.00759018  | 5.33E-07    |
| phe.Fasting_rs6781454 | S8 | PHC3   | rs112091318 | S5  | TMEM64      | 6.37E-09 | 2.60E-01 | 6.15E-06    | 2.78E-10 | 0.0113034   | 7.60E-07    |
| phe.Fasting_rs6781454 | S8 | PHC3   | rs112348319 | S8  | SPTLC1      | 1.98E-05 | 1        | 0.00828284  | 7.96E-10 | 0.0323902   | 1.95E-06    |
| phe.Fasting_rs6781454 | S8 | PHC3   | rs112608164 | S8  | SPTLC1      | 1.98E-05 | 1.00E+00 | 8.28E-03    | 7.96E-10 | 0.0323902   | 1.95E-06    |
| phe.Fasting_rs6781454 | S8 | PHC3   | rs113568654 | S12 | SPTLC1      | 1.90E-05 | 1        | 7.97E-03    | 1.05E-08 | 0.426793    | 1.93E-05    |
| phe.Fasting_rs6781454 | S8 | PHC3   | rs114565620 | S8  | RCL1        | 2.86E-19 | 1.17E-11 | 2.40E-14    | 4.04E-07 | 1           | 0.000492337 |
| phe.Fasting_rs6781454 | S8 | PHC3   | rs115083290 | S19 | NA          | 8.98E-08 | 1        | 6.92E-05    | 3.42E-09 | 0.139166    | 7.15E-06    |
| phe.Fasting_rs6781454 | S8 | PHC3   | rs115752779 | S19 | NA          | 8.98E-08 | 1.00E+00 | 6.92E-05    | 3.42E-09 | 0.139166    | 7.15E-06    |
| phe.Fasting_rs6781454 | S8 | PHC3   | rs115888477 | S8  | NA          | 1.37E-06 | 1        | 0.000804037 | 8.02E-11 | 0.00326649  | 2.50E-07    |
| phe.Fasting_rs6781454 | S8 | PHC3   | rs116011837 | S9  | BRD2        | 2.77E-13 | 1.13E-05 | 5.95E-10    | 2.10E-11 | 0.000853749 | 7.39E-08    |
| phe.Fasting_rs6781454 | S8 | PHC3   | rs116120727 | S9  | BRD2        | 2.77E-13 | 1.13E-05 | 5.95E-10    | 2.10E-11 | 0.000853749 | 7.39E-08    |
| phe.Fasting_rs6781454 | S8 | PHC3   | rs116548615 | S8  | TMEM45B     | 5.34E-19 | 2.18E-11 | 2.49E-14    | 6.36E-10 | 0.0259048   | 1.60E-06    |
| phe.Fasting_rs6781454 | S8 | PHC3   | rs11989304  | S4  | TMEM64      | 2.10E-08 | 8.59E-01 | 1.85E-05    | 1.86E-10 | 0.00758489  | 5.33E-07    |
| phe.Fasting_rs6781454 | S8 | PHC3   | rs140524622 | S7  | MRPL10      | 2.32E-08 | 0.949049 | 2.03E-05    | 2.15E-06 | 1           | 0.00220681  |
| phe.Fasting_rs6781454 | S8 | PHC3   | rs141926074 | S8  | ATE1        | 1.26E-19 | 5.15E-12 | 2.23E-14    | 1.36E-11 | 0.00055511  | 4.95E-08    |
| phe.Fasting_rs6781454 | S8 | PHC3   | rs73392640  | S8  | POLR3B      | 6.73E-08 | 1        | 5.36E-05    | 9.08E-06 | 1           | 0.00754737  |
| phe.Fasting_rs6781454 | S8 | PHC3   | rs74627895  | S8  | TMEM64      | 6.37E-09 | 0.260193 | 6.15E-06    | 1.02E-06 | 1           | 0.00115421  |
| phe.Fasting_rs6781454 | S8 | PHC3   | rs75350765  | S5  | RCL1        | 2.86E-19 | 1.17E-11 | 2.40E-14    | 4.04E-07 | 1           | 0.000492337 |

|                       |    |      |             |     |            |          |          |            |          |             |            |
|-----------------------|----|------|-------------|-----|------------|----------|----------|------------|----------|-------------|------------|
| phe.Fasting_rs6781454 | S8 | PHC3 | rs75506779  | S5  | TMCO3      | 2.11E-09 | 8.63E-02 | 2.20E-06   | 2.98E-06 | 1           | 0.00291794 |
| phe.Fasting_rs6781454 | S8 | PHC3 | rs75949566  | S5  | TMEM64     | 2.31E-08 | 9.42E-01 | 2.01E-05   | 3.24E-10 | 0.0132      | 8.70E-07   |
| phe.Fasting_rs6781454 | S8 | PHC3 | rs76542405  | S5  | SPTLC1     | 1.98E-05 | 1.00E+00 | 8.28E-03   | 7.96E-10 | 0.0323902   | 1.95E-06   |
| phe.Fasting_rs6781454 | S8 | PHC3 | rs77523818  | S7  | SPTLC1     | 1.98E-05 | 1.00E+00 | 8.28E-03   | 7.96E-10 | 0.0323902   | 1.95E-06   |
| phe.Fasting_rs6781454 | S8 | PHC3 | rs7763107   | S8  | FARS2      | 1.31E-09 | 5.37E-02 | 1.42E-06   | 2.46E-06 | 1           | 0.0024697  |
| phe.Fasting_rs6781454 | S8 | PHC3 | rs77845645  | S21 | NA         | 1.00E-08 | 0.410117 | 9.35E-06   | 9.87E-13 | 4.02E-05    | 4.68E-09   |
| phe.Fasting_rs6781454 | S8 | PHC3 | rs78990344  | S2  | LOC1005063 | 2.10E-08 | 8.59E-01 | 1.85E-05   | 1.86E-10 | 0.00758489  | 5.33E-07   |
| phe.Fasting_rs6786022 | S8 | PHC3 | rs111576333 | S5  | TMEM64     | 3.41E-08 | 1.00E+00 | 2.89E-05   | 8.51E-10 | 0.034621    | 2.05E-06   |
| phe.Fasting_rs6786022 | S8 | PHC3 | rs112091318 | S5  | TMEM64     | 1.01E-08 | 0.412089 | 9.40E-06   | 1.27E-09 | 0.0517029   | 2.93E-06   |
| phe.Fasting_rs6786022 | S8 | PHC3 | rs114565620 | S8  | RCL1       | 3.53E-19 | 1.44E-11 | 2.40E-14   | 1.19E-06 | 1           | 1.32E-03   |
| phe.Fasting_rs6786022 | S8 | PHC3 | rs115083290 | S19 | NA         | 2.80E-06 | 1.00E+00 | 1.49E-03   | 4.08E-09 | 0.165931    | 8.36E-06   |
| phe.Fasting_rs6786022 | S8 | PHC3 | rs115752779 | S19 | NA         | 2.80E-06 | 1        | 1.49E-03   | 4.08E-09 | 0.165931    | 8.36E-06   |
| phe.Fasting_rs6786022 | S8 | PHC3 | rs116011837 | S9  | BRD2       | 4.93E-13 | 2.01E-05 | 1.04E-09   | 2.60E-11 | 0.0010602   | 8.99E-08   |
| phe.Fasting_rs6786022 | S8 | PHC3 | rs116120727 | S9  | BRD2       | 4.93E-13 | 2.01E-05 | 1.04E-09   | 2.60E-11 | 0.0010602   | 8.99E-08   |
| phe.Fasting_rs6786022 | S8 | PHC3 | rs116548615 | S8  | TMEM45B    | 9.13E-09 | 3.73E-01 | 8.60E-06   | 2.32E-09 | 0.0942588   | 5.04E-06   |
| phe.Fasting_rs6786022 | S8 | PHC3 | rs11989304  | S4  | TMEM64     | 3.41E-08 | 1.00E+00 | 2.89E-05   | 8.55E-10 | 0.0347858   | 2.06E-06   |
| phe.Fasting_rs6786022 | S8 | PHC3 | rs140524622 | S7  | MRPL10     | 3.46E-08 | 1.00E+00 | 2.93E-05   | 2.64E-06 | 1           | 2.62E-03   |
| phe.Fasting_rs6786022 | S8 | PHC3 | rs141926074 | S8  | ATE1       | 7.17E-07 | 1.00E+00 | 4.52E-04   | 1.68E-11 | 0.000683787 | 6.02E-08   |
| phe.Fasting_rs6786022 | S8 | PHC3 | rs57287019  | S5  | CLCN3      | 1.13E-05 | 1.00E+00 | 5.11E-03   | 5.28E-06 | 1           | 0.00479294 |
| phe.Fasting_rs6786022 | S8 | PHC3 | rs73392640  | S8  | POLR3B     | 2.93E-06 | 1.00E+00 | 1.55E-03   | 1.05E-05 | 1           | 0.00854924 |
| phe.Fasting_rs6786022 | S8 | PHC3 | rs74627895  | S8  | TMEM64     | 1.01E-08 | 0.412089 | 9.40E-06   | 1.60E-06 | 1           | 1.71E-03   |
| phe.Fasting_rs6786022 | S8 | PHC3 | rs75350765  | S5  | RCL1       | 3.53E-19 | 1.44E-11 | 2.40E-14   | 1.19E-06 | 1           | 0.00132234 |
| phe.Fasting_rs6786022 | S8 | PHC3 | rs75949566  | S5  | TMEM64     | 3.74E-08 | 1.00E+00 | 3.15E-05   | 3.93E-10 | 0.015993    | 1.04E-06   |
| phe.Fasting_rs6786022 | S8 | PHC3 | rs7657672   | S8  | CLCN3      | 1.36E-05 | 1        | 0.00597592 | 2.04E-06 | 1           | 0.00210582 |
| phe.Fasting_rs6786022 | S8 | PHC3 | rs77845645  | S21 | NA         | 7.00E-08 | 1.00E+00 | 5.55E-05   | 1.20E-12 | 4.88E-05    | 5.52E-09   |
| phe.Fasting_rs6786022 | S8 | PHC3 | rs78990344  | S2  | LOC1005063 | 3.41E-08 | 1.00E+00 | 2.89E-05   | 8.55E-10 | 0.0347858   | 2.06E-06   |
| phe.Fasting_rs6808506 | S7 | PHC3 | rs111576333 | S5  | TMEM64     | 2.07E-08 | 8.44E-01 | 1.82E-05   | 2.31E-10 | 0.00941342  | 6.43E-07   |
| phe.Fasting_rs6808506 | S7 | PHC3 | rs112091318 | S5  | TMEM64     | 6.28E-09 | 2.57E-01 | 6.07E-06   | 3.37E-10 | 0.013698    | 8.96E-07   |
| phe.Fasting_rs6808506 | S7 | PHC3 | rs112348319 | S8  | SPTLC1     | 1.92E-05 | 1.00E+00 | 8.06E-03   | 7.84E-10 | 0.0319139   | 1.93E-06   |
| phe.Fasting_rs6808506 | S7 | PHC3 | rs112608164 | S8  | SPTLC1     | 1.92E-05 | 1.00E+00 | 8.06E-03   | 7.84E-10 | 0.0319139   | 1.93E-06   |
| phe.Fasting_rs6808506 | S7 | PHC3 | rs113568654 | S12 | SPTLC1     | 1.84E-05 | 1        | 7.76E-03   | 1.04E-08 | 0.421423    | 1.91E-05   |
| phe.Fasting_rs6808506 | S7 | PHC3 | rs114565620 | S8  | RCL1       | 2.84E-19 | 1.16E-11 | 2.40E-14   | 4.01E-07 | 1           | 4.90E-04   |
| phe.Fasting_rs6808506 | S7 | PHC3 | rs115083290 | S19 | NA         | 8.85E-08 | 1.00E+00 | 6.83E-05   | 3.40E-09 | 0.138522    | 7.12E-06   |
| phe.Fasting_rs6808506 | S7 | PHC3 | rs115752779 | S19 | NA         | 8.85E-08 | 1.00E+00 | 6.83E-05   | 3.40E-09 | 0.138522    | 7.12E-06   |
| phe.Fasting_rs6808506 | S7 | PHC3 | rs115888477 | S8  | NA         | 1.34E-06 | 1.00E+00 | 7.91E-04   | 7.82E-11 | 0.00318365  | 2.44E-07   |
| phe.Fasting_rs6808506 | S7 | PHC3 | rs116011837 | S9  | BRD2       | 2.70E-13 | 1.10E-05 | 5.81E-10   | 2.07E-11 | 0.000841008 | 7.31E-08   |
| phe.Fasting_rs6808506 | S7 | PHC3 | rs116120727 | S9  | BRD2       | 2.70E-13 | 1.10E-05 | 5.81E-10   | 2.07E-11 | 0.000841008 | 7.31E-08   |
| phe.Fasting_rs6808506 | S7 | PHC3 | rs116548615 | S8  | TMEM45B    | 5.29E-19 | 2.16E-11 | 2.49E-14   | 7.92E-10 | 0.0322544   | 1.95E-06   |
| phe.Fasting_rs6808506 | S7 | PHC3 | rs11989304  | S4  | TMEM64     | 2.07E-08 | 8.44E-01 | 1.82E-05   | 2.29E-10 | 0.00932569  | 6.39E-07   |
| phe.Fasting_rs6808506 | S7 | PHC3 | rs140524622 | S7  | MRPL10     | 2.30E-08 | 9.39E-01 | 2.01E-05   | 2.14E-06 | 1           | 0.00219216 |

|                       |    |      |             |     |             |          |             |          |          |             |             |
|-----------------------|----|------|-------------|-----|-------------|----------|-------------|----------|----------|-------------|-------------|
| phe.Fasting_rs6808506 | S7 | PHC3 | rs141926074 | S8  | ATE1        | 1.23E-19 | 5.04E-12    | 2.23E-14 | 1.34E-11 | 0.000545558 | 4.89E-08    |
| phe.Fasting_rs6808506 | S7 | PHC3 | rs73392640  | S8  | POLR3B      | 6.58E-08 | 1.00E+00    | 5.26E-05 | 8.97E-06 | 1           | 0.00747055  |
| phe.Fasting_rs6808506 | S7 | PHC3 | rs74627895  | S8  | TMEM64      | 6.28E-09 | 2.57E-01    | 6.07E-06 | 1.27E-06 | 1           | 0.00139909  |
| phe.Fasting_rs6808506 | S7 | PHC3 | rs75350765  | S5  | RCL1        | 2.84E-19 | 1.16E-11    | 2.40E-14 | 4.01E-07 | 1           | 0.000489631 |
| phe.Fasting_rs6808506 | S7 | PHC3 | rs75506779  | S5  | TMCO3       | 7.38E-14 | 3.01E-06    | 1.70E-10 | 3.50E-06 | 1           | 0.00334821  |
| phe.Fasting_rs6808506 | S7 | PHC3 | rs75949566  | S5  | TMEM64      | 2.26E-08 | 0.923876    | 1.98E-05 | 3.24E-10 | 0.0132      | 8.70E-07    |
| phe.Fasting_rs6808506 | S7 | PHC3 | rs76542405  | S5  | SPTLC1      | 1.92E-05 | 1           | 8.06E-03 | 7.84E-10 | 0.0319139   | 1.93E-06    |
| phe.Fasting_rs6808506 | S7 | PHC3 | rs77523818  | S7  | SPTLC1      | 1.92E-05 | 1           | 8.06E-03 | 7.84E-10 | 0.0319139   | 1.93E-06    |
| phe.Fasting_rs6808506 | S7 | PHC3 | rs7763107   | S8  | FARS2       | 1.30E-09 | 0.0532742   | 1.41E-06 | 2.87E-06 | 1           | 0.00281845  |
| phe.Fasting_rs6808506 | S7 | PHC3 | rs77845645  | S21 | NA          | 9.87E-09 | 4.03E-01    | 9.22E-06 | 9.90E-13 | 4.03E-05    | 4.68E-09    |
| phe.Fasting_rs6808506 | S7 | PHC3 | rs78990344  | S2  | LOC1005063  | 2.07E-08 | 0.844108    | 1.82E-05 | 2.29E-10 | 0.00932569  | 6.39E-07    |
| phe.Fasting_rs6822970 | S8 | NEK1 | rs112027720 | S7  | DIAPH1      | 9.17E-12 | 0.000374383 | 1.48E-08 | 2.23E-08 | 0.908274    | 3.74E-05    |
| phe.Fasting_rs6822970 | S8 | NEK1 | rs112089881 | S8  | ZFAND4      | 1.84E-18 | 7.51E-11    | 3.89E-14 | 5.67E-09 | 0.230592    | 1.11E-05    |
| phe.Fasting_rs6822970 | S8 | NEK1 | rs113219478 | S7  | DIAPH1      | 9.17E-12 | 0.000374383 | 1.48E-08 | 2.23E-08 | 0.908274    | 3.74E-05    |
| phe.Fasting_rs6822970 | S8 | NEK1 | rs113357907 | S24 | ISL1        | 6.12E-18 | 2.50E-10    | 7.50E-14 | 9.34E-16 | 3.80E-08    | 1.16E-11    |
| phe.Fasting_rs6822970 | S8 | NEK1 | rs115787552 | S5  | KPNA3       | 3.50E-16 | 1.43E-08    | 1.15E-12 | 2.15E-07 | 1           | 0.000281471 |
| phe.Fasting_rs6822970 | S8 | NEK1 | rs115888477 | S8  | NA          | 2.70E-15 | 1.10E-07    | 7.57E-12 | 1.63E-08 | 0.66442     | 2.86E-05    |
| phe.Fasting_rs6822970 | S8 | NEK1 | rs116011837 | S9  | BRD2        | 2.29E-17 | 9.34E-10    | 1.45E-13 | 2.21E-10 | 0.00900315  | 6.20E-07    |
| phe.Fasting_rs6822970 | S8 | NEK1 | rs116079984 | S8  | KPNA3       | 3.50E-16 | 1.43E-08    | 1.15E-12 | 2.52E-07 | 1           | 0.000325188 |
| phe.Fasting_rs6822970 | S8 | NEK1 | rs116120727 | S9  | BRD2        | 2.29E-17 | 9.34E-10    | 1.45E-13 | 2.21E-10 | 0.00900315  | 6.20E-07    |
| phe.Fasting_rs6822970 | S8 | NEK1 | rs116279995 | S20 | "PCDHGA4,PI | 2.15E-05 | 1.00E+00    | 8.87E-03 | 2.34E-07 | 1           | 0.000303649 |
| phe.Fasting_rs6822970 | S8 | NEK1 | rs138090701 | S5  | HDAC3       | 1.02E-12 | 4.17E-05    | 2.10E-09 | 1.29E-08 | 0.523399    | 2.33E-05    |
| phe.Fasting_rs6822970 | S8 | NEK1 | rs138136869 | S7  | DIAPH1      | 1.65E-12 | 6.74E-05    | 3.16E-09 | 3.12E-09 | 0.127195    | 6.59E-06    |
| phe.Fasting_rs6822970 | S8 | NEK1 | rs138457103 | S10 | DIAPH1      | 5.43E-12 | 0.000221795 | 9.60E-09 | 2.09E-08 | 0.850097    | 3.57E-05    |
| phe.Fasting_rs6822970 | S8 | NEK1 | rs138487229 | S11 | DIAPH1      | 9.17E-12 | 0.000374383 | 1.48E-08 | 2.23E-08 | 0.908274    | 3.74E-05    |
| phe.Fasting_rs6822970 | S8 | NEK1 | rs138738950 | S8  | "PCDHGB2,PI | 9.17E-12 | 3.74E-04    | 1.48E-08 | 2.22E-08 | 0.904374    | 3.74E-05    |
| phe.Fasting_rs6822970 | S8 | NEK1 | rs139297927 | S8  | DIAPH1      | 9.17E-12 | 3.74E-04    | 1.48E-08 | 2.23E-08 | 0.908274    | 3.74E-05    |
| phe.Fasting_rs6822970 | S8 | NEK1 | rs139337303 | S8  | DIAPH1      | 9.17E-12 | 3.74E-04    | 1.48E-08 | 2.23E-08 | 0.908274    | 3.74E-05    |
| phe.Fasting_rs6822970 | S8 | NEK1 | rs139403963 | S8  | DIAPH1      | 1.65E-12 | 6.74E-05    | 3.16E-09 | 3.12E-09 | 0.127195    | 6.59E-06    |
| phe.Fasting_rs6822970 | S8 | NEK1 | rs139621309 | S18 | "LOC100505  | 9.17E-12 | 3.74E-04    | 1.48E-08 | 2.23E-08 | 0.908274    | 3.74E-05    |
| phe.Fasting_rs6822970 | S8 | NEK1 | rs139828110 | S8  | DIAPH1      | 1.65E-12 | 6.74E-05    | 3.16E-09 | 3.12E-09 | 0.127195    | 6.59E-06    |
| phe.Fasting_rs6822970 | S8 | NEK1 | rs140070363 | S8  | DIAPH1      | 9.17E-12 | 3.74E-04    | 1.48E-08 | 2.23E-08 | 0.908274    | 3.74E-05    |
| phe.Fasting_rs6822970 | S8 | NEK1 | rs140644750 | S13 | DIAPH1      | 9.17E-12 | 3.74E-04    | 1.48E-08 | 2.23E-08 | 0.908274    | 3.74E-05    |
| phe.Fasting_rs6822970 | S8 | NEK1 | rs141022544 | S8  | DIAPH1      | 9.17E-12 | 3.74E-04    | 1.48E-08 | 2.23E-08 | 0.908274    | 3.74E-05    |
| phe.Fasting_rs6822970 | S8 | NEK1 | rs141525984 | S5  | DIAPH1      | 9.17E-12 | 3.74E-04    | 1.48E-08 | 2.23E-08 | 0.908274    | 3.74E-05    |
| phe.Fasting_rs6822970 | S8 | NEK1 | rs141926074 | S8  | ATE1        | 1.33E-06 | 1.00E+00    | 7.83E-04 | 1.98E-14 | 8.07E-07    | 1.59E-10    |
| phe.Fasting_rs6822970 | S8 | NEK1 | rs142480565 | S8  | DIAPH1      | 9.17E-12 | 0.000374383 | 1.48E-08 | 2.23E-08 | 0.908274    | 3.74E-05    |
| phe.Fasting_rs6822970 | S8 | NEK1 | rs142718558 | S7  | "DIAPH1,LOC | 9.17E-12 | 0.000374383 | 1.48E-08 | 2.23E-08 | 0.908274    | 3.74E-05    |
| phe.Fasting_rs6822970 | S8 | NEK1 | rs142789100 | S8  | DIAPH1      | 1.65E-12 | 6.74E-05    | 3.16E-09 | 3.12E-09 | 0.127195    | 6.59E-06    |
| phe.Fasting_rs6822970 | S8 | NEK1 | rs142812798 | S7  | DIAPH1      | 1.65E-12 | 6.74E-05    | 3.16E-09 | 3.12E-09 | 0.127195    | 6.59E-06    |



|              |           |    |      |                 |               |          |             |          |          |           |             |
|--------------|-----------|----|------|-----------------|---------------|----------|-------------|----------|----------|-----------|-------------|
| phe.Fasting_ | rs6822970 | S8 | NEK1 | rs143377827 S13 | "DIAPH1,LOC   | 1.45E-12 | 5.90E-05    | 2.83E-09 | 2.57E-09 | 0.104505  | 5.52E-06    |
| phe.Fasting_ | rs6822970 | S8 | NEK1 | rs143691978 S11 | DIAPH1        | 1.65E-12 | 6.74E-05    | 3.16E-09 | 5.06E-09 | 0.206028  | 1.01E-05    |
| phe.Fasting_ | rs6822970 | S8 | NEK1 | rs144081334 S11 | DIAPH1        | 1.65E-12 | 6.74E-05    | 3.16E-09 | 5.06E-09 | 0.206028  | 1.01E-05    |
| phe.Fasting_ | rs6822970 | S8 | NEK1 | rs144613910 S8  | DIAPH1        | 9.17E-12 | 0.000374383 | 1.48E-08 | 2.23E-08 | 0.908274  | 3.74E-05    |
| phe.Fasting_ | rs6822970 | S8 | NEK1 | rs145027704 S11 | DIAPH1        | 1.65E-12 | 6.74E-05    | 3.16E-09 | 5.06E-09 | 0.206028  | 1.01E-05    |
| phe.Fasting_ | rs6822970 | S8 | NEK1 | rs146220673 S7  | DIAPH1        | 9.17E-12 | 0.000374383 | 1.48E-08 | 2.23E-08 | 0.908274  | 3.74E-05    |
| phe.Fasting_ | rs6822970 | S8 | NEK1 | rs146622060 S13 | DIAPH1        | 1.65E-12 | 6.74E-05    | 3.16E-09 | 5.06E-09 | 0.206028  | 1.01E-05    |
| phe.Fasting_ | rs6822970 | S8 | NEK1 | rs146815317 S5  | KPNA3         | 3.50E-16 | 1.43E-08    | 1.15E-12 | 2.15E-07 | 1         | 0.000281471 |
| phe.Fasting_ | rs6822970 | S8 | NEK1 | rs146878162 S7  | DIAPH1        | 9.17E-12 | 3.74E-04    | 1.48E-08 | 2.23E-08 | 0.908274  | 3.74E-05    |
| phe.Fasting_ | rs6822970 | S8 | NEK1 | rs1470889 S5    | ZC3H3         | 3.60E-08 | 1           | 3.04E-05 | 6.78E-07 | 1         | 0.000791674 |
| phe.Fasting_ | rs6822970 | S8 | NEK1 | rs1470890 S5    | ZC3H3         | 3.60E-08 | 1.00E+00    | 3.04E-05 | 6.78E-07 | 1         | 7.92E-04    |
| phe.Fasting_ | rs6822970 | S8 | NEK1 | rs147314451 S8  | DIAPH1        | 9.17E-12 | 3.74E-04    | 1.48E-08 | 2.23E-08 | 0.908274  | 3.74E-05    |
| phe.Fasting_ | rs6822970 | S8 | NEK1 | rs147417996 S7  | DIAPH1        | 1.65E-12 | 6.74E-05    | 3.16E-09 | 5.06E-09 | 0.206028  | 1.01E-05    |
| phe.Fasting_ | rs6822970 | S8 | NEK1 | rs147506725 S21 | "PCDHGA1,Pi   | 2.15E-05 | 1.00E+00    | 8.87E-03 | 2.34E-07 | 1         | 0.000303649 |
| phe.Fasting_ | rs6822970 | S8 | NEK1 | rs147646948 S7  | "LOC100505056 | 9.17E-12 | 3.74E-04    | 1.48E-08 | 2.23E-08 | 0.908274  | 3.74E-05    |
| phe.Fasting_ | rs6822970 | S8 | NEK1 | rs147677041 S8  | DIAPH1        | 1.65E-12 | 6.74E-05    | 3.16E-09 | 3.12E-09 | 0.127195  | 6.59E-06    |
| phe.Fasting_ | rs6822970 | S8 | NEK1 | rs148116628 S7  | DIAPH1        | 9.17E-12 | 0.000374383 | 1.48E-08 | 2.23E-08 | 0.908274  | 3.74E-05    |
| phe.Fasting_ | rs6822970 | S8 | NEK1 | rs148423011 S7  | DIAPH1        | 9.17E-12 | 0.000374383 | 1.48E-08 | 2.23E-08 | 0.908274  | 3.74E-05    |
| phe.Fasting_ | rs6822970 | S8 | NEK1 | rs149019627 S8  | DIAPH1        | 1.65E-12 | 6.74E-05    | 3.16E-09 | 3.12E-09 | 0.127195  | 6.59E-06    |
| phe.Fasting_ | rs6822970 | S8 | NEK1 | rs149075406 S8  | DIAPH1        | 9.17E-12 | 0.000374383 | 1.48E-08 | 2.23E-08 | 0.908274  | 3.74E-05    |
| phe.Fasting_ | rs6822970 | S8 | NEK1 | rs149334783 S8  | DIAPH1        | 9.17E-12 | 3.74E-04    | 1.48E-08 | 2.23E-08 | 0.908274  | 3.74E-05    |
| phe.Fasting_ | rs6822970 | S8 | NEK1 | rs149553852 S21 | "PCDHGA10,    | 2.15E-05 | 1.00E+00    | 8.87E-03 | 2.34E-07 | 1         | 0.000303649 |
| phe.Fasting_ | rs6822970 | S8 | NEK1 | rs149716949 S5  | DIAPH1        | 7.67E-13 | 3.13E-05    | 1.59E-09 | 2.72E-09 | 0.110842  | 5.82E-06    |
| phe.Fasting_ | rs6822970 | S8 | NEK1 | rs149791570 S5  | DIAPH1        | 1.65E-12 | 6.74E-05    | 3.16E-09 | 3.12E-09 | 0.127195  | 6.59E-06    |
| phe.Fasting_ | rs6822970 | S8 | NEK1 | rs150117838 S8  | KPNA3         | 3.50E-16 | 1.43E-08    | 1.15E-12 | 2.05E-07 | 1         | 0.000270369 |
| phe.Fasting_ | rs6822970 | S8 | NEK1 | rs150452206 S13 | "DIAPH1,LOC   | 9.17E-12 | 3.74E-04    | 1.48E-08 | 2.23E-08 | 0.908274  | 3.74E-05    |
| phe.Fasting_ | rs6822970 | S8 | NEK1 | rs150675915 S7  | DIAPH1        | 9.17E-12 | 3.74E-04    | 1.48E-08 | 2.23E-08 | 0.908274  | 3.74E-05    |
| phe.Fasting_ | rs6822970 | S8 | NEK1 | rs150765570 S7  | DIAPH1        | 9.17E-12 | 3.74E-04    | 1.48E-08 | 2.23E-08 | 0.908274  | 3.74E-05    |
| phe.Fasting_ | rs6822970 | S8 | NEK1 | rs150992994 S11 | "PCDHGA5,Pi   | 9.47E-12 | 3.87E-04    | 1.52E-08 | 2.14E-08 | 0.869105  | 3.65E-05    |
| phe.Fasting_ | rs6822970 | S8 | NEK1 | rs151204700 S8  | DIAPH1        | 9.17E-12 | 3.74E-04    | 1.48E-08 | 2.23E-08 | 0.908274  | 3.74E-05    |
| phe.Fasting_ | rs6822970 | S8 | NEK1 | rs151330468 S8  | DIAPH1        | 1.65E-12 | 6.74E-05    | 3.16E-09 | 5.06E-09 | 0.206028  | 1.01E-05    |
| phe.Fasting_ | rs6822970 | S8 | NEK1 | rs16894241 S4   | HIST1H2BK     | 5.24E-08 | 1           | 4.28E-05 | 5.37E-07 | 1         | 0.000638437 |
| phe.Fasting_ | rs6822970 | S8 | NEK1 | rs180772028 S8  | "DIAPH1,LOC   | 9.17E-12 | 0.000374383 | 1.48E-08 | 2.23E-08 | 0.908274  | 3.74E-05    |
| phe.Fasting_ | rs6822970 | S8 | NEK1 | rs181224861 S7  | DIAPH1        | 9.17E-12 | 0.000374383 | 1.48E-08 | 2.23E-08 | 0.908274  | 3.74E-05    |
| phe.Fasting_ | rs6822970 | S8 | NEK1 | rs181247960 S21 | "PCDHGA9,Pi   | 2.15E-05 | 1           | 8.87E-03 | 2.34E-07 | 1         | 0.000303649 |
| phe.Fasting_ | rs6822970 | S8 | NEK1 | rs181824655 S21 | "PCDHGB6,Pi   | 2.15E-05 | 1           | 8.87E-03 | 2.34E-07 | 1         | 0.000303649 |
| phe.Fasting_ | rs6822970 | S8 | NEK1 | rs182714699 S8  | DIAPH1        | 9.17E-12 | 0.000374383 | 1.48E-08 | 2.23E-08 | 0.908274  | 3.74E-05    |
| phe.Fasting_ | rs6822970 | S8 | NEK1 | rs182965141 S8  | DIAPH1        | 2.01E-12 | 8.19E-05    | 3.80E-09 | 1.71E-09 | 0.0696833 | 3.83E-06    |
| phe.Fasting_ | rs6822970 | S8 | NEK1 | rs183597049 S7  | DIAPH1        | 9.17E-12 | 0.000374383 | 1.48E-08 | 2.23E-08 | 0.908274  | 3.74E-05    |
| phe.Fasting_ | rs6822970 | S8 | NEK1 | rs183980988 S2  | NA            | 9.17E-12 | 0.000374383 | 1.48E-08 | 2.23E-08 | 0.908274  | 3.74E-05    |

|                       |     |      |                 |             |          |             |          |          |           |             |
|-----------------------|-----|------|-----------------|-------------|----------|-------------|----------|----------|-----------|-------------|
| phe.Fasting_rs6822970 | S8  | NEK1 | rs184233232 S7  | DIAPH1      | 9.17E-12 | 0.000374383 | 1.48E-08 | 2.23E-08 | 0.908274  | 3.74E-05    |
| phe.Fasting_rs6822970 | S8  | NEK1 | rs184509477 S13 | "PCDHGB4,PI | 9.17E-12 | 0.000374383 | 1.48E-08 | 2.23E-08 | 0.908274  | 3.74E-05    |
| phe.Fasting_rs6822970 | S8  | NEK1 | rs185069296 S15 | "LOC1005056 | 9.17E-12 | 3.74E-04    | 1.48E-08 | 2.23E-08 | 0.908274  | 3.74E-05    |
| phe.Fasting_rs6822970 | S8  | NEK1 | rs185502834 S8  | DIAPH1      | 1.65E-12 | 6.74E-05    | 3.16E-09 | 3.12E-09 | 0.127195  | 6.59E-06    |
| phe.Fasting_rs6822970 | S8  | NEK1 | rs185759881 S7  | DIAPH1      | 9.17E-12 | 0.000374383 | 1.48E-08 | 2.23E-08 | 0.908274  | 3.74E-05    |
| phe.Fasting_rs6822970 | S8  | NEK1 | rs186288044 S21 | "PCDHGB4,PI | 2.15E-05 | 1.00E+00    | 8.87E-03 | 2.34E-07 | 1         | 3.04E-04    |
| phe.Fasting_rs6822970 | S8  | NEK1 | rs187000011 S11 | DIAPH1      | 9.17E-12 | 3.74E-04    | 1.48E-08 | 2.23E-08 | 0.908274  | 3.74E-05    |
| phe.Fasting_rs6822970 | S8  | NEK1 | rs188981295 S5  | "RPS27AP10, | 9.17E-12 | 3.74E-04    | 1.48E-08 | 2.23E-08 | 0.908274  | 3.74E-05    |
| phe.Fasting_rs6822970 | S8  | NEK1 | rs190559574 S7  | DIAPH1      | 1.65E-12 | 6.74E-05    | 3.16E-09 | 3.12E-09 | 0.127195  | 6.59E-06    |
| phe.Fasting_rs6822970 | S8  | NEK1 | rs191544043 S8  | DIAPH1      | 9.17E-12 | 3.74E-04    | 1.48E-08 | 2.23E-08 | 0.908274  | 3.74E-05    |
| phe.Fasting_rs6822970 | S8  | NEK1 | rs191766712 S7  | DIAPH1      | 9.17E-12 | 3.74E-04    | 1.48E-08 | 2.23E-08 | 0.908274  | 3.74E-05    |
| phe.Fasting_rs6822970 | S8  | NEK1 | rs192690040 S7  | DIAPH1      | 9.17E-12 | 0.000374383 | 1.48E-08 | 2.23E-08 | 0.908274  | 3.74E-05    |
| phe.Fasting_rs6822970 | S8  | NEK1 | rs192765219 S7  | DIAPH1      | 9.17E-12 | 0.000374383 | 1.48E-08 | 2.23E-08 | 0.908274  | 3.74E-05    |
| phe.Fasting_rs6822970 | S8  | NEK1 | rs192770525 S7  | DIAPH1      | 9.17E-12 | 3.74E-04    | 1.48E-08 | 2.23E-08 | 0.908274  | 3.74E-05    |
| phe.Fasting_rs6822970 | S8  | NEK1 | rs2924507 S5    | ZC3H3       | 3.60E-08 | 1.00E+00    | 3.04E-05 | 6.78E-07 | 1         | 0.000791674 |
| phe.Fasting_rs6822970 | S8  | NEK1 | rs2924508 S8    | ZC3H3       | 3.60E-08 | 1.00E+00    | 3.04E-05 | 9.52E-07 | 1         | 1.08E-03    |
| phe.Fasting_rs6822970 | S8  | NEK1 | rs2924511 S7    | ZC3H3       | 3.60E-08 | 1           | 3.04E-05 | 5.76E-07 | 1         | 0.000680958 |
| phe.Fasting_rs6822970 | S8  | NEK1 | rs2924512 S7    | ZC3H3       | 4.02E-08 | 1.00E+00    | 3.37E-05 | 7.17E-07 | 1         | 0.00083355  |
| phe.Fasting_rs6822970 | S8  | NEK1 | rs2956376 S8    | ZC3H3       | 3.60E-08 | 1.00E+00    | 3.04E-05 | 3.89E-07 | 1         | 0.000476148 |
| phe.Fasting_rs6822970 | S8  | NEK1 | rs2980270 S7    | ZC3H3       | 3.60E-08 | 1.00E+00    | 3.04E-05 | 3.89E-07 | 1         | 0.000476148 |
| phe.Fasting_rs6822970 | S8  | NEK1 | rs2980272 S7    | ZC3H3       | 4.02E-08 | 1.00E+00    | 3.37E-05 | 7.52E-07 | 1         | 0.000869902 |
| phe.Fasting_rs6822970 | S8  | NEK1 | rs2980275 S5    | ZC3H3       | 3.60E-08 | 1.00E+00    | 3.04E-05 | 6.78E-07 | 1         | 0.000791674 |
| phe.Fasting_rs6822970 | S8  | NEK1 | rs35990401 S7   | DIAPH1      | 8.40E-12 | 3.43E-04    | 1.39E-08 | 8.38E-09 | 0.340996  | 1.59E-05    |
| phe.Fasting_rs6822970 | S8  | NEK1 | rs366767 S5     | ZC3H3       | 6.34E-08 | 1.00E+00    | 5.08E-05 | 4.19E-07 | 1         | 0.000508745 |
| phe.Fasting_rs6822970 | S8  | NEK1 | rs55900860 S7   | DIAPH1      | 1.65E-12 | 6.74E-05    | 3.16E-09 | 3.12E-09 | 0.127195  | 6.59E-06    |
| phe.Fasting_rs6822970 | S8  | NEK1 | rs6881310 S23   | ISL1        | 4.23E-17 | 1.73E-09    | 2.22E-13 | 2.34E-12 | 9.53E-05  | 1.01E-08    |
| phe.Fasting_rs6822970 | S8  | NEK1 | rs73619637 S8   | NA          | 1.02E-16 | 1.45E-09    | 4.31E-13 | 1.35E-08 | 0.549186  | 2.43E-05    |
| phe.Fasting_rs6822970 | S8  | NEK1 | rs77444916 S23  | LOC642366   | 1.50E-17 | 6.11E-10    | 1.18E-13 | 8.75E-16 | 3.56E-08  | 1.16E-11    |
| phe.Fasting_rs6822970 | S8  | NEK1 | rs77798597 S7   | KPNA3       | 3.50E-16 | 1.43E-08    | 1.15E-12 | 2.05E-07 | 1         | 0.000270369 |
| phe.Fasting_rs6822970 | S8  | NEK1 | rs78703708 S7   | FAF2        | 9.25E-18 | 3.78E-10    | 9.24E-14 | 2.08E-07 | 1         | 0.000273911 |
| phe.Fasting_rs6822970 | S8  | NEK1 | rs78736524 S5   | KPNA3       | 3.50E-16 | 1.43E-08    | 1.15E-12 | 2.15E-07 | 1         | 0.000281471 |
| phe.Fasting_rs6822970 | S8  | NEK1 | rs79517926 S15  | "DIAPH1,LOC | 2.69E-12 | 0.000109672 | 4.97E-09 | 2.29E-09 | 0.0931701 | 4.98E-06    |
| phe.Fasting_rs6822970 | S8  | NEK1 | rs79781495 S8   | KPNA3       | 3.50E-16 | 1.43E-08    | 1.15E-12 | 2.05E-07 | 1         | 0.000270369 |
| phe.Fasting_rs6822970 | S8  | NEK1 | rs80258830 S24  | LOC642366   | 1.50E-17 | 6.11E-10    | 1.18E-13 | 8.75E-16 | 3.56E-08  | 1.16E-11    |
| phe.Fasting_rs6822970 | S8  | NEK1 | rs80332465 S5   | KPNA3       | 3.75E-16 | 1.53E-08    | 1.22E-12 | 2.14E-07 | 1         | 0.000280922 |
| phe.Fasting_rs6822970 | S8  | NEK1 | rs80334773 S5   | KPNA3       | 3.75E-16 | 1.53E-08    | 1.22E-12 | 2.14E-07 | 1         | 0.000280922 |
| phe.Fasting_rs6829220 | S20 | NEK1 | rs112027720 S7  | DIAPH1      | 9.17E-12 | 3.74E-04    | 1.48E-08 | 9.70E-09 | 0.394978  | 1.81E-05    |
| phe.Fasting_rs6829220 | S20 | NEK1 | rs112089881 S8  | ZFAND4      | 1.84E-18 | 7.51E-11    | 3.89E-14 | 2.77E-09 | 0.112698  | 5.90E-06    |
| phe.Fasting_rs6829220 | S20 | NEK1 | rs113219478 S7  | DIAPH1      | 9.17E-12 | 3.74E-04    | 1.48E-08 | 9.70E-09 | 0.394978  | 1.81E-05    |
| phe.Fasting_rs6829220 | S20 | NEK1 | rs113357907 S24 | ISL1        | 6.12E-18 | 2.50E-10    | 7.50E-14 | 4.03E-16 | 1.64E-08  | 1.16E-11    |

|                       |     |      |                 |             |          |             |             |          |            |             |
|-----------------------|-----|------|-----------------|-------------|----------|-------------|-------------|----------|------------|-------------|
| phe.Fasting_rs6829220 | S20 | NEK1 | rs115888477 S8  | NA          | 2.70E-15 | 1.10E-07    | 7.57E-12    | 2.67E-06 | 1          | 0.00264447  |
| phe.Fasting_rs6829220 | S20 | NEK1 | rs116011837 S9  | BRD2        | 2.29E-17 | 9.34E-10    | 1.45E-13    | 8.57E-11 | 0.00348829 | 2.64E-07    |
| phe.Fasting_rs6829220 | S20 | NEK1 | rs116120727 S9  | BRD2        | 2.29E-17 | 9.34E-10    | 1.45E-13    | 8.57E-11 | 0.00348829 | 2.64E-07    |
| phe.Fasting_rs6829220 | S20 | NEK1 | rs116279995 S20 | "PCDHGA4,PI | 2.15E-05 | 1.00E+00    | 8.87E-03    | 9.47E-08 | 1          | 0.000134747 |
| phe.Fasting_rs6829220 | S20 | NEK1 | rs138090701 S5  | HDAC3       | 1.02E-12 | 4.17E-05    | 2.10E-09    | 4.63E-09 | 0.188358   | 9.27E-06    |
| phe.Fasting_rs6829220 | S20 | NEK1 | rs138136869 S7  | DIAPH1      | 1.65E-12 | 6.74E-05    | 3.16E-09    | 1.25E-09 | 0.0510001  | 2.90E-06    |
| phe.Fasting_rs6829220 | S20 | NEK1 | rs138457103 S10 | DIAPH1      | 5.43E-12 | 2.22E-04    | 9.60E-09    | 9.11E-09 | 0.370794   | 1.72E-05    |
| phe.Fasting_rs6829220 | S20 | NEK1 | rs138487229 S11 | DIAPH1      | 9.17E-12 | 3.74E-04    | 1.48E-08    | 9.70E-09 | 0.394978   | 1.81E-05    |
| phe.Fasting_rs6829220 | S20 | NEK1 | rs138738950 S8  | "PCDHGB2,PI | 9.17E-12 | 3.74E-04    | 1.48E-08    | 9.66E-09 | 0.393262   | 1.81E-05    |
| phe.Fasting_rs6829220 | S20 | NEK1 | rs139297927 S8  | DIAPH1      | 9.17E-12 | 3.74E-04    | 1.48E-08    | 9.70E-09 | 0.394978   | 1.81E-05    |
| phe.Fasting_rs6829220 | S20 | NEK1 | rs139337303 S8  | DIAPH1      | 9.17E-12 | 3.74E-04    | 1.48E-08    | 9.70E-09 | 0.394978   | 1.81E-05    |
| phe.Fasting_rs6829220 | S20 | NEK1 | rs139403963 S8  | DIAPH1      | 1.65E-12 | 6.74E-05    | 3.16E-09    | 1.25E-09 | 0.0510001  | 2.90E-06    |
| phe.Fasting_rs6829220 | S20 | NEK1 | rs139621309 S18 | "LOC1005056 | 9.17E-12 | 3.74E-04    | 1.48E-08    | 9.70E-09 | 0.394978   | 1.81E-05    |
| phe.Fasting_rs6829220 | S20 | NEK1 | rs139828110 S8  | DIAPH1      | 1.65E-12 | 6.74E-05    | 3.16E-09    | 1.25E-09 | 0.0510001  | 2.90E-06    |
| phe.Fasting_rs6829220 | S20 | NEK1 | rs140070363 S8  | DIAPH1      | 9.17E-12 | 0.000374383 | 1.48E-08    | 9.70E-09 | 0.394978   | 1.81E-05    |
| phe.Fasting_rs6829220 | S20 | NEK1 | rs140644750 S13 | DIAPH1      | 9.17E-12 | 3.74E-04    | 1.48E-08    | 9.70E-09 | 0.394978   | 1.81E-05    |
| phe.Fasting_rs6829220 | S20 | NEK1 | rs141022544 S8  | DIAPH1      | 9.17E-12 | 3.74E-04    | 1.48E-08    | 9.70E-09 | 0.394978   | 1.81E-05    |
| phe.Fasting_rs6829220 | S20 | NEK1 | rs141525984 S5  | DIAPH1      | 9.17E-12 | 0.000374383 | 1.48E-08    | 9.70E-09 | 0.394978   | 1.81E-05    |
| phe.Fasting_rs6829220 | S20 | NEK1 | rs141926074 S8  | ATE1        | 1.33E-06 | 1           | 0.000783423 | 7.93E-15 | 3.23E-07   | 7.00E-11    |
| phe.Fasting_rs6829220 | S20 | NEK1 | rs142480565 S8  | DIAPH1      | 9.17E-12 | 0.000374383 | 1.48E-08    | 9.70E-09 | 0.394978   | 1.81E-05    |
| phe.Fasting_rs6829220 | S20 | NEK1 | rs142718558 S7  | "DIAPH1,LOC | 9.17E-12 | 3.74E-04    | 1.48E-08    | 9.70E-09 | 0.394978   | 1.81E-05    |
| phe.Fasting_rs6829220 | S20 | NEK1 | rs142789100 S8  | DIAPH1      | 1.65E-12 | 6.74E-05    | 3.16E-09    | 1.25E-09 | 0.0510001  | 2.90E-06    |
| phe.Fasting_rs6829220 | S20 | NEK1 | rs142812798 S7  | DIAPH1      | 1.65E-12 | 6.74E-05    | 3.16E-09    | 1.25E-09 | 0.0510001  | 2.90E-06    |
| phe.Fasting_rs6829220 | S20 | NEK1 | rs143377827 S13 | "DIAPH1,LOC | 1.45E-12 | 5.90E-05    | 2.83E-09    | 1.02E-09 | 0.0416914  | 2.43E-06    |
| phe.Fasting_rs6829220 | S20 | NEK1 | rs143691978 S11 | DIAPH1      | 1.65E-12 | 6.74E-05    | 3.16E-09    | 2.15E-09 | 0.087529   | 4.71E-06    |
| phe.Fasting_rs6829220 | S20 | NEK1 | rs144081334 S11 | DIAPH1      | 1.65E-12 | 6.74E-05    | 3.16E-09    | 2.15E-09 | 0.087529   | 4.71E-06    |
| phe.Fasting_rs6829220 | S20 | NEK1 | rs144613910 S8  | DIAPH1      | 9.17E-12 | 3.74E-04    | 1.48E-08    | 9.70E-09 | 0.394978   | 1.81E-05    |
| phe.Fasting_rs6829220 | S20 | NEK1 | rs145027704 S11 | DIAPH1      | 1.65E-12 | 6.74E-05    | 3.16E-09    | 2.15E-09 | 0.087529   | 4.71E-06    |
| phe.Fasting_rs6829220 | S20 | NEK1 | rs146220673 S7  | DIAPH1      | 9.17E-12 | 3.74E-04    | 1.48E-08    | 9.70E-09 | 0.394978   | 1.81E-05    |
| phe.Fasting_rs6829220 | S20 | NEK1 | rs146622060 S13 | DIAPH1      | 1.65E-12 | 6.74E-05    | 3.16E-09    | 2.15E-09 | 0.087529   | 4.71E-06    |
| phe.Fasting_rs6829220 | S20 | NEK1 | rs146878162 S7  | DIAPH1      | 9.17E-12 | 3.74E-04    | 1.48E-08    | 9.70E-09 | 0.394978   | 1.81E-05    |
| phe.Fasting_rs6829220 | S20 | NEK1 | rs1470889 S5    | ZC3H3       | 3.60E-08 | 1           | 3.04E-05    | 6.78E-07 | 1          | 0.000791674 |
| phe.Fasting_rs6829220 | S20 | NEK1 | rs1470890 S5    | ZC3H3       | 3.60E-08 | 1           | 3.04E-05    | 6.78E-07 | 1          | 0.000791674 |
| phe.Fasting_rs6829220 | S20 | NEK1 | rs147314451 S8  | DIAPH1      | 9.17E-12 | 0.000374383 | 1.48E-08    | 9.70E-09 | 0.394978   | 1.81E-05    |
| phe.Fasting_rs6829220 | S20 | NEK1 | rs147417996 S7  | DIAPH1      | 1.65E-12 | 6.74E-05    | 3.16E-09    | 2.15E-09 | 0.087529   | 4.71E-06    |
| phe.Fasting_rs6829220 | S20 | NEK1 | rs147506725 S21 | "PCDHGA1,PI | 2.15E-05 | 1           | 8.87E-03    | 9.47E-08 | 1          | 0.000134747 |
| phe.Fasting_rs6829220 | S20 | NEK1 | rs147646948 S7  | "LOC1005056 | 9.17E-12 | 0.000374383 | 1.48E-08    | 9.70E-09 | 0.394978   | 1.81E-05    |
| phe.Fasting_rs6829220 | S20 | NEK1 | rs147677041 S8  | DIAPH1      | 1.65E-12 | 6.74E-05    | 3.16E-09    | 1.25E-09 | 0.0510001  | 2.90E-06    |
| phe.Fasting_rs6829220 | S20 | NEK1 | rs148116628 S7  | DIAPH1      | 9.17E-12 | 0.000374383 | 1.48E-08    | 9.70E-09 | 0.394978   | 1.81E-05    |
| phe.Fasting_rs6829220 | S20 | NEK1 | rs148423011 S7  | DIAPH1      | 9.17E-12 | 0.000374383 | 1.48E-08    | 9.70E-09 | 0.394978   | 1.81E-05    |

|                       |     |      |                 |             |          |             |            |          |           |             |
|-----------------------|-----|------|-----------------|-------------|----------|-------------|------------|----------|-----------|-------------|
| phe.Fasting_rs6829220 | S20 | NEK1 | rs149019627 S8  | DIAPH1      | 1.65E-12 | 6.74E-05    | 3.16E-09   | 1.25E-09 | 0.0510001 | 2.90E-06    |
| phe.Fasting_rs6829220 | S20 | NEK1 | rs149075406 S8  | DIAPH1      | 9.17E-12 | 0.000374383 | 1.48E-08   | 9.70E-09 | 0.394978  | 1.81E-05    |
| phe.Fasting_rs6829220 | S20 | NEK1 | rs149334783 S8  | DIAPH1      | 9.17E-12 | 3.74E-04    | 1.48E-08   | 9.70E-09 | 0.394978  | 1.81E-05    |
| phe.Fasting_rs6829220 | S20 | NEK1 | rs149553852 S21 | "PCDHGA10,I | 2.15E-05 | 1.00E+00    | 8.87E-03   | 9.47E-08 | 1         | 0.000134747 |
| phe.Fasting_rs6829220 | S20 | NEK1 | rs149716949 S5  | DIAPH1      | 7.67E-13 | 3.13E-05    | 1.59E-09   | 1.12E-09 | 0.0455921 | 2.64E-06    |
| phe.Fasting_rs6829220 | S20 | NEK1 | rs149791570 S5  | DIAPH1      | 1.65E-12 | 6.74E-05    | 3.16E-09   | 1.25E-09 | 0.0510001 | 2.90E-06    |
| phe.Fasting_rs6829220 | S20 | NEK1 | rs150452206 S13 | "DIAPH1,LOC | 9.17E-12 | 3.74E-04    | 1.48E-08   | 9.70E-09 | 0.394978  | 1.81E-05    |
| phe.Fasting_rs6829220 | S20 | NEK1 | rs150675915 S7  | DIAPH1      | 9.17E-12 | 3.74E-04    | 1.48E-08   | 9.70E-09 | 0.394978  | 1.81E-05    |
| phe.Fasting_rs6829220 | S20 | NEK1 | rs150765570 S7  | DIAPH1      | 9.17E-12 | 3.74E-04    | 1.48E-08   | 9.70E-09 | 0.394978  | 1.81E-05    |
| phe.Fasting_rs6829220 | S20 | NEK1 | rs150992994 S11 | "PCDHGA5,PI | 9.47E-12 | 3.87E-04    | 1.52E-08   | 9.38E-09 | 0.381964  | 1.77E-05    |
| phe.Fasting_rs6829220 | S20 | NEK1 | rs151204700 S8  | DIAPH1      | 9.17E-12 | 3.74E-04    | 1.48E-08   | 9.70E-09 | 0.394978  | 1.81E-05    |
| phe.Fasting_rs6829220 | S20 | NEK1 | rs151330468 S8  | DIAPH1      | 1.65E-12 | 6.74E-05    | 3.16E-09   | 2.15E-09 | 0.087529  | 4.71E-06    |
| phe.Fasting_rs6829220 | S20 | NEK1 | rs16894241 S4   | HIST1H2BK   | 5.24E-08 | 1           | 4.28E-05   | 2.86E-07 | 1         | 0.000363243 |
| phe.Fasting_rs6829220 | S20 | NEK1 | rs180772028 S8  | "DIAPH1,LOC | 9.17E-12 | 0.000374383 | 1.48E-08   | 9.70E-09 | 0.394978  | 1.81E-05    |
| phe.Fasting_rs6829220 | S20 | NEK1 | rs181224861 S7  | DIAPH1      | 9.17E-12 | 0.000374383 | 1.48E-08   | 9.70E-09 | 0.394978  | 1.81E-05    |
| phe.Fasting_rs6829220 | S20 | NEK1 | rs181247960 S21 | "PCDHGA9,PI | 2.15E-05 | 1           | 0.00887266 | 9.47E-08 | 1         | 0.000134747 |
| phe.Fasting_rs6829220 | S20 | NEK1 | rs181824655 S21 | "PCDHGB6,PI | 2.15E-05 | 1           | 8.87E-03   | 9.47E-08 | 1         | 0.000134747 |
| phe.Fasting_rs6829220 | S20 | NEK1 | rs182714699 S8  | DIAPH1      | 9.17E-12 | 0.000374383 | 1.48E-08   | 9.70E-09 | 0.394978  | 1.81E-05    |
| phe.Fasting_rs6829220 | S20 | NEK1 | rs182965141 S8  | DIAPH1      | 2.01E-12 | 8.19E-05    | 3.80E-09   | 6.50E-10 | 0.0264673 | 1.63E-06    |
| phe.Fasting_rs6829220 | S20 | NEK1 | rs183597049 S7  | DIAPH1      | 9.17E-12 | 0.000374383 | 1.48E-08   | 9.70E-09 | 0.394978  | 1.81E-05    |
| phe.Fasting_rs6829220 | S20 | NEK1 | rs183980988 S2  | NA          | 9.17E-12 | 0.000374383 | 1.48E-08   | 9.70E-09 | 0.394978  | 1.81E-05    |
| phe.Fasting_rs6829220 | S20 | NEK1 | rs184233232 S7  | DIAPH1      | 9.17E-12 | 0.000374383 | 1.48E-08   | 9.70E-09 | 0.394978  | 1.81E-05    |
| phe.Fasting_rs6829220 | S20 | NEK1 | rs184509477 S13 | "PCDHGB4,PI | 9.17E-12 | 0.000374383 | 1.48E-08   | 9.70E-09 | 0.394978  | 1.81E-05    |
| phe.Fasting_rs6829220 | S20 | NEK1 | rs185069296 S15 | "LOC1005050 | 9.17E-12 | 0.000374383 | 1.48E-08   | 9.70E-09 | 0.394978  | 1.81E-05    |
| phe.Fasting_rs6829220 | S20 | NEK1 | rs185502834 S8  | DIAPH1      | 1.65E-12 | 6.74E-05    | 3.16E-09   | 1.25E-09 | 0.0510001 | 2.90E-06    |
| phe.Fasting_rs6829220 | S20 | NEK1 | rs185759881 S7  | DIAPH1      | 9.17E-12 | 0.000374383 | 1.48E-08   | 9.70E-09 | 0.394978  | 1.81E-05    |
| phe.Fasting_rs6829220 | S20 | NEK1 | rs186288044 S21 | "PCDHGB4,PI | 2.15E-05 | 1           | 0.00887266 | 9.47E-08 | 1         | 0.000134747 |
| phe.Fasting_rs6829220 | S20 | NEK1 | rs187000011 S11 | DIAPH1      | 9.17E-12 | 0.000374383 | 1.48E-08   | 9.70E-09 | 0.394978  | 1.81E-05    |
| phe.Fasting_rs6829220 | S20 | NEK1 | rs188981295 S5  | "RPS27AP10, | 9.17E-12 | 0.000374383 | 1.48E-08   | 9.70E-09 | 0.394978  | 1.81E-05    |
| phe.Fasting_rs6829220 | S20 | NEK1 | rs190559574 S7  | DIAPH1      | 1.65E-12 | 6.74E-05    | 3.16E-09   | 1.25E-09 | 0.0510001 | 2.90E-06    |
| phe.Fasting_rs6829220 | S20 | NEK1 | rs191544043 S8  | DIAPH1      | 9.17E-12 | 0.000374383 | 1.48E-08   | 9.70E-09 | 0.394978  | 1.81E-05    |
| phe.Fasting_rs6829220 | S20 | NEK1 | rs191766712 S7  | DIAPH1      | 9.17E-12 | 0.000374383 | 1.48E-08   | 9.70E-09 | 0.394978  | 1.81E-05    |
| phe.Fasting_rs6829220 | S20 | NEK1 | rs192690040 S7  | DIAPH1      | 9.17E-12 | 0.000374383 | 1.48E-08   | 9.70E-09 | 0.394978  | 1.81E-05    |
| phe.Fasting_rs6829220 | S20 | NEK1 | rs192765219 S7  | DIAPH1      | 9.17E-12 | 0.000374383 | 1.48E-08   | 9.70E-09 | 0.394978  | 1.81E-05    |
| phe.Fasting_rs6829220 | S20 | NEK1 | rs192770525 S7  | DIAPH1      | 9.17E-12 | 0.000374383 | 1.48E-08   | 9.70E-09 | 0.394978  | 1.81E-05    |
| phe.Fasting_rs6829220 | S20 | NEK1 | rs2924507 S5    | ZC3H3       | 3.60E-08 | 1           | 3.04E-05   | 6.78E-07 | 1         | 0.000791674 |
| phe.Fasting_rs6829220 | S20 | NEK1 | rs2924508 S8    | ZC3H3       | 3.60E-08 | 1           | 3.04E-05   | 9.52E-07 | 1         | 0.00108069  |
| phe.Fasting_rs6829220 | S20 | NEK1 | rs2924511 S7    | ZC3H3       | 3.60E-08 | 1           | 3.04E-05   | 5.76E-07 | 1         | 0.000680958 |
| phe.Fasting_rs6829220 | S20 | NEK1 | rs2924512 S7    | ZC3H3       | 4.02E-08 | 1           | 3.37E-05   | 7.17E-07 | 1         | 0.00083355  |
| phe.Fasting_rs6829220 | S20 | NEK1 | rs2956376 S8    | ZC3H3       | 3.60E-08 | 1           | 3.04E-05   | 3.89E-07 | 1         | 0.000476148 |

|                       |     |      |             |     |             |          |             |            |          |             |             |
|-----------------------|-----|------|-------------|-----|-------------|----------|-------------|------------|----------|-------------|-------------|
| phe.Fasting_rs6829220 | S20 | NEK1 | rs2980270   | S7  | ZC3H3       | 3.60E-08 | 1           | 3.04E-05   | 3.89E-07 | 1           | 0.000476148 |
| phe.Fasting_rs6829220 | S20 | NEK1 | rs2980272   | S7  | ZC3H3       | 4.02E-08 | 1           | 3.37E-05   | 7.52E-07 | 1           | 0.000869902 |
| phe.Fasting_rs6829220 | S20 | NEK1 | rs2980275   | S5  | ZC3H3       | 3.60E-08 | 1           | 3.04E-05   | 6.78E-07 | 1           | 0.000791674 |
| phe.Fasting_rs6829220 | S20 | NEK1 | rs35990401  | S7  | DIAPH1      | 8.40E-12 | 0.000343123 | 1.39E-08   | 3.62E-09 | 0.147164    | 7.50E-06    |
| phe.Fasting_rs6829220 | S20 | NEK1 | rs366767    | S5  | ZC3H3       | 6.34E-08 | 1           | 5.08E-05   | 4.19E-07 | 1           | 0.000508745 |
| phe.Fasting_rs6829220 | S20 | NEK1 | rs55900860  | S7  | DIAPH1      | 1.65E-12 | 6.74E-05    | 3.16E-09   | 1.25E-09 | 0.0510001   | 2.90E-06    |
| phe.Fasting_rs6829220 | S20 | NEK1 | rs57503635  | S3  | NA          | 7.93E-17 | 3.24E-09    | 3.50E-13   | 1.02E-05 | 1           | 8.32E-03    |
| phe.Fasting_rs6829220 | S20 | NEK1 | rs6881310   | S23 | ISL1        | 4.23E-17 | 1.73E-09    | 2.22E-13   | 8.72E-13 | 3.55E-05    | 4.15E-09    |
| phe.Fasting_rs6829220 | S20 | NEK1 | rs73619637  | S8  | NA          | 1.02E-16 | 4.15E-09    | 4.31E-13   | 6.10E-09 | 0.248478    | 1.19E-05    |
| phe.Fasting_rs6829220 | S20 | NEK1 | rs73794928  | S13 | "PCDHGA9,PI | 1.55E-05 | 1           | 6.66E-03   | 1.19E-05 | 1           | 0.0093559   |
| phe.Fasting_rs6829220 | S20 | NEK1 | rs77444916  | S23 | LOC642366   | 1.50E-17 | 6.11E-10    | 1.18E-13   | 3.78E-16 | 1.54E-08    | 1.16E-11    |
| phe.Fasting_rs6829220 | S20 | NEK1 | rs78703708  | S7  | FAF2        | 9.25E-18 | 3.78E-10    | 9.24E-14   | 7.48E-08 | 1           | 0.000109374 |
| phe.Fasting_rs6829220 | S20 | NEK1 | rs79517926  | S15 | "DIAPH1,LOC | 2.69E-12 | 0.000109672 | 4.97E-09   | 8.36E-10 | 0.0340091   | 2.03E-06    |
| phe.Fasting_rs6829220 | S20 | NEK1 | rs80258830  | S24 | LOC642366   | 1.50E-17 | 6.11E-10    | 1.18E-13   | 3.78E-16 | 1.54E-08    | 1.16E-11    |
| phe.Fasting_rs6881310 | S23 | ISL1 | rs111576333 | S5  | TMEM64      | 1.08E-16 | 4.40E-09    | 4.54E-13   | 2.77E-12 | 0.000112791 | 1.18E-08    |
| phe.Fasting_rs6881310 | S23 | ISL1 | rs112027720 | S7  | DIAPH1      | 1.55E-05 | 1           | 0.00665749 | 1.69E-14 | 6.89E-07    | 1.40E-10    |
| phe.Fasting_rs6881310 | S23 | ISL1 | rs112091318 | S5  | TMEM64      | 3.20E-17 | 1.31E-09    | 1.80E-13   | 3.90E-12 | 0.000158821 | 1.61E-08    |
| phe.Fasting_rs6881310 | S23 | ISL1 | rs113219478 | S7  | DIAPH1      | 1.55E-05 | 1           | 6.66E-03   | 1.69E-14 | 6.89E-07    | 1.40E-10    |
| phe.Fasting_rs6881310 | S23 | ISL1 | rs113568654 | S12 | SPTLC1      | 5.06E-07 | 1           | 3.32E-04   | 1.74E-07 | 1           | 2.34E-04    |
| phe.Fasting_rs6881310 | S23 | ISL1 | rs114334325 | S7  | AP3M2       | 2.20E-15 | 9.00E-08    | 6.24E-12   | 2.75E-07 | 1           | 0.000350345 |
| phe.Fasting_rs6881310 | S23 | ISL1 | rs114394395 | S7  | AP3M2       | 2.36E-15 | 9.64E-08    | 6.64E-12   | 2.75E-07 | 1           | 0.000350345 |
| phe.Fasting_rs6881310 | S23 | ISL1 | rs114565620 | S8  | RCL1        | 7.36E-17 | 3.01E-09    | 3.30E-13   | 5.29E-16 | 2.16E-08    | 1.16E-11    |
| phe.Fasting_rs6881310 | S23 | ISL1 | rs115083290 | S19 | NA          | 4.28E-06 | 1           | 0.00216927 | 9.56E-11 | 0.0038905   | 2.93E-07    |
| phe.Fasting_rs6881310 | S23 | ISL1 | rs115305957 | S23 | NA          | 2.01E-07 | 1           | 1.43E-04   | 2.61E-09 | 0.106209    | 5.60E-06    |
| phe.Fasting_rs6881310 | S23 | ISL1 | rs115752779 | S19 | NA          | 4.28E-06 | 1           | 0.00216927 | 9.56E-11 | 0.0038905   | 2.93E-07    |
| phe.Fasting_rs6881310 | S23 | ISL1 | rs115787552 | S5  | KPNA3       | 7.90E-16 | 3.23E-08    | 2.39E-12   | 5.45E-11 | 0.00221813  | 1.75E-07    |
| phe.Fasting_rs6881310 | S23 | ISL1 | rs115888477 | S8  | NA          | 5.37E-15 | 2.19E-07    | 1.40E-11   | 7.87E-12 | 0.000320516 | 2.98E-08    |
| phe.Fasting_rs6881310 | S23 | ISL1 | rs116011837 | S9  | BRD2        | 6.72E-17 | 2.74E-09    | 3.07E-13   | 2.73E-12 | 0.000111142 | 1.17E-08    |
| phe.Fasting_rs6881310 | S23 | ISL1 | rs116079984 | S8  | KPNA3       | 7.90E-16 | 3.23E-08    | 2.39E-12   | 6.53E-11 | 0.00265964  | 2.06E-07    |
| phe.Fasting_rs6881310 | S23 | ISL1 | rs116120727 | S9  | BRD2        | 6.72E-17 | 2.74E-09    | 3.07E-13   | 2.73E-12 | 0.000111142 | 1.17E-08    |
| phe.Fasting_rs6881310 | S23 | ISL1 | rs116279995 | S20 | "PCDHGA4,PI | 2.58E-06 | 1           | 1.39E-03   | 1.32E-13 | 5.39E-06    | 7.72E-10    |
| phe.Fasting_rs6881310 | S23 | ISL1 | rs116406581 | S2  | NA          | 8.99E-15 | 3.67E-07    | 2.30E-11   | 1.75E-07 | 1           | 0.000235894 |
| phe.Fasting_rs6881310 | S23 | ISL1 | rs116696844 | S3  | AP3M2       | 3.39E-15 | 1.39E-07    | 9.20E-12   | 2.75E-07 | 1           | 0.000350345 |
| phe.Fasting_rs6881310 | S23 | ISL1 | rs11989304  | S4  | TMEM64      | 1.08E-16 | 4.40E-09    | 4.54E-13   | 2.68E-12 | 0.000109081 | 1.15E-08    |
| phe.Fasting_rs6881310 | S23 | ISL1 | rs138090701 | S5  | HDAC3       | 2.59E-06 | 1           | 1.40E-03   | 1.46E-14 | 5.94E-07    | 1.23E-10    |
| phe.Fasting_rs6881310 | S23 | ISL1 | rs138136869 | S7  | DIAPH1      | 4.12E-06 | 1           | 0.00210112 | 3.76E-15 | 1.53E-07    | 3.56E-11    |
| phe.Fasting_rs6881310 | S23 | ISL1 | rs138457103 | S10 | DIAPH1      | 9.64E-06 | 1           | 0.0044265  | 1.57E-14 | 6.40E-07    | 1.32E-10    |
| phe.Fasting_rs6881310 | S23 | ISL1 | rs138487229 | S11 | DIAPH1      | 1.55E-05 | 1           | 0.00665749 | 1.69E-14 | 6.89E-07    | 1.40E-10    |
| phe.Fasting_rs6881310 | S23 | ISL1 | rs138738950 | S8  | "PCDHGB2,PI | 1.55E-05 | 1           | 0.00665749 | 1.71E-14 | 6.97E-07    | 1.41E-10    |
| phe.Fasting_rs6881310 | S23 | ISL1 | rs139297927 | S8  | DIAPH1      | 1.55E-05 | 1           | 0.00665749 | 1.69E-14 | 6.89E-07    | 1.40E-10    |

|              |           |     |      |             |     |             |          |          |            |          |             |          |
|--------------|-----------|-----|------|-------------|-----|-------------|----------|----------|------------|----------|-------------|----------|
| phe.Fasting_ | rs6881310 | S23 | ISL1 | rs139337303 | S8  | DIAPH1      | 1.55E-05 | 1        | 6.66E-03   | 1.69E-14 | 6.89E-07    | 1.40E-10 |
| phe.Fasting_ | rs6881310 | S23 | ISL1 | rs139403963 | S8  | DIAPH1      | 4.12E-06 | 1        | 0.00210112 | 3.76E-15 | 1.53E-07    | 3.56E-11 |
| phe.Fasting_ | rs6881310 | S23 | ISL1 | rs139621309 | S18 | "LOC1005056 | 1.55E-05 | 1        | 6.66E-03   | 1.69E-14 | 6.89E-07    | 1.40E-10 |
| phe.Fasting_ | rs6881310 | S23 | ISL1 | rs139828110 | S8  | DIAPH1      | 4.12E-06 | 1        | 0.00210112 | 3.76E-15 | 1.53E-07    | 3.56E-11 |
| phe.Fasting_ | rs6881310 | S23 | ISL1 | rs140070363 | S8  | DIAPH1      | 1.55E-05 | 1        | 0.00665749 | 1.69E-14 | 6.89E-07    | 1.40E-10 |
| phe.Fasting_ | rs6881310 | S23 | ISL1 | rs140524622 | S7  | MRPL10      | 9.43E-07 | 1        | 5.75E-04   | 6.92E-12 | 0.000281768 | 2.66E-08 |
| phe.Fasting_ | rs6881310 | S23 | ISL1 | rs140644750 | S13 | DIAPH1      | 1.55E-05 | 1        | 0.00665749 | 1.69E-14 | 6.89E-07    | 1.40E-10 |
| phe.Fasting_ | rs6881310 | S23 | ISL1 | rs141022544 | S8  | DIAPH1      | 1.55E-05 | 1        | 0.00665749 | 1.69E-14 | 6.89E-07    | 1.40E-10 |
| phe.Fasting_ | rs6881310 | S23 | ISL1 | rs141525984 | S5  | DIAPH1      | 1.55E-05 | 1        | 0.00665749 | 1.69E-14 | 6.89E-07    | 1.40E-10 |
| phe.Fasting_ | rs6881310 | S23 | ISL1 | rs141692339 | S3  | "PCDHGA6,Pi | 3.14E-06 | 1        | 0.00164966 | 1.87E-13 | 7.63E-06    | 1.05E-09 |
| phe.Fasting_ | rs6881310 | S23 | ISL1 | rs141926074 | S8  | ATE1        | 1.62E-17 | 6.61E-10 | 1.24E-13   | 9.17E-15 | 3.73E-07    | 8.00E-11 |
| phe.Fasting_ | rs6881310 | S23 | ISL1 | rs142480565 | S8  | DIAPH1      | 1.55E-05 | 1        | 0.00665749 | 1.69E-14 | 6.89E-07    | 1.40E-10 |
| phe.Fasting_ | rs6881310 | S23 | ISL1 | rs142718558 | S7  | "DIAPH1,LOC | 1.55E-05 | 1        | 0.00665749 | 1.69E-14 | 6.89E-07    | 1.40E-10 |
| phe.Fasting_ | rs6881310 | S23 | ISL1 | rs142789100 | S8  | DIAPH1      | 4.12E-06 | 1        | 0.00210112 | 3.76E-15 | 1.53E-07    | 3.56E-11 |
| phe.Fasting_ | rs6881310 | S23 | ISL1 | rs142812798 | S7  | DIAPH1      | 4.12E-06 | 1        | 0.00210112 | 3.76E-15 | 1.53E-07    | 3.56E-11 |
| phe.Fasting_ | rs6881310 | S23 | ISL1 | rs143377827 | S13 | "DIAPH1,LOC | 4.23E-06 | 1        | 0.00215017 | 3.10E-15 | 1.26E-07    | 2.98E-11 |
| phe.Fasting_ | rs6881310 | S23 | ISL1 | rs143691978 | S11 | DIAPH1      | 4.12E-06 | 1        | 0.00210112 | 4.03E-15 | 1.64E-07    | 3.77E-11 |
| phe.Fasting_ | rs6881310 | S23 | ISL1 | rs144081334 | S11 | DIAPH1      | 4.12E-06 | 1        | 0.00210112 | 4.03E-15 | 1.64E-07    | 3.77E-11 |
| phe.Fasting_ | rs6881310 | S23 | ISL1 | rs144613910 | S8  | DIAPH1      | 1.55E-05 | 1        | 0.00665749 | 1.69E-14 | 6.89E-07    | 1.40E-10 |
| phe.Fasting_ | rs6881310 | S23 | ISL1 | rs145027704 | S11 | DIAPH1      | 4.12E-06 | 1        | 0.00210112 | 4.03E-15 | 1.64E-07    | 3.77E-11 |
| phe.Fasting_ | rs6881310 | S23 | ISL1 | rs146220673 | S7  | DIAPH1      | 1.55E-05 | 1        | 0.00665749 | 1.69E-14 | 6.89E-07    | 1.40E-10 |
| phe.Fasting_ | rs6881310 | S23 | ISL1 | rs146622060 | S13 | DIAPH1      | 4.12E-06 | 1.00E+00 | 2.10E-03   | 4.03E-15 | 1.64E-07    | 3.77E-11 |
| phe.Fasting_ | rs6881310 | S23 | ISL1 | rs146815317 | S5  | KPNA3       | 7.90E-16 | 3.23E-08 | 2.39E-12   | 5.45E-11 | 0.00221813  | 1.75E-07 |
| phe.Fasting_ | rs6881310 | S23 | ISL1 | rs146878162 | S7  | DIAPH1      | 1.55E-05 | 1        | 6.66E-03   | 1.69E-14 | 6.89E-07    | 1.40E-10 |
| phe.Fasting_ | rs6881310 | S23 | ISL1 | rs1470889   | S5  | ZC3H3       | 7.81E-08 | 1.00E+00 | 6.10E-05   | 3.45E-09 | 0.140598    | 7.21E-06 |
| phe.Fasting_ | rs6881310 | S23 | ISL1 | rs1470890   | S5  | ZC3H3       | 7.81E-08 | 1.00E+00 | 6.10E-05   | 3.45E-09 | 0.140598    | 7.21E-06 |
| phe.Fasting_ | rs6881310 | S23 | ISL1 | rs147314451 | S8  | DIAPH1      | 1.55E-05 | 1.00E+00 | 6.66E-03   | 1.69E-14 | 6.89E-07    | 1.40E-10 |
| phe.Fasting_ | rs6881310 | S23 | ISL1 | rs147417996 | S7  | DIAPH1      | 4.12E-06 | 1.00E+00 | 2.10E-03   | 4.03E-15 | 1.64E-07    | 3.77E-11 |
| phe.Fasting_ | rs6881310 | S23 | ISL1 | rs147506725 | S21 | "PCDHGA1,Pi | 2.58E-06 | 1.00E+00 | 1.39E-03   | 1.32E-13 | 5.39E-06    | 7.72E-10 |
| phe.Fasting_ | rs6881310 | S23 | ISL1 | rs147646948 | S7  | "LOC1005056 | 1.55E-05 | 1.00E+00 | 6.66E-03   | 1.69E-14 | 6.89E-07    | 1.40E-10 |
| phe.Fasting_ | rs6881310 | S23 | ISL1 | rs147677041 | S8  | DIAPH1      | 4.12E-06 | 1.00E+00 | 2.10E-03   | 3.76E-15 | 1.53E-07    | 3.56E-11 |
| phe.Fasting_ | rs6881310 | S23 | ISL1 | rs148116628 | S7  | DIAPH1      | 1.55E-05 | 1.00E+00 | 6.66E-03   | 1.69E-14 | 6.89E-07    | 1.40E-10 |
| phe.Fasting_ | rs6881310 | S23 | ISL1 | rs148423011 | S7  | DIAPH1      | 1.55E-05 | 1.00E+00 | 6.66E-03   | 1.69E-14 | 6.89E-07    | 1.40E-10 |
| phe.Fasting_ | rs6881310 | S23 | ISL1 | rs149019627 | S8  | DIAPH1      | 4.12E-06 | 1.00E+00 | 2.10E-03   | 3.76E-15 | 1.53E-07    | 3.56E-11 |
| phe.Fasting_ | rs6881310 | S23 | ISL1 | rs149075406 | S8  | DIAPH1      | 1.55E-05 | 1.00E+00 | 6.66E-03   | 1.69E-14 | 6.89E-07    | 1.40E-10 |
| phe.Fasting_ | rs6881310 | S23 | ISL1 | rs149334783 | S8  | DIAPH1      | 1.55E-05 | 1.00E+00 | 6.66E-03   | 1.69E-14 | 6.89E-07    | 1.40E-10 |
| phe.Fasting_ | rs6881310 | S23 | ISL1 | rs149553852 | S21 | "PCDHGA10,I | 2.58E-06 | 1.00E+00 | 1.39E-03   | 1.32E-13 | 5.39E-06    | 7.72E-10 |
| phe.Fasting_ | rs6881310 | S23 | ISL1 | rs149716949 | S5  | DIAPH1      | 2.39E-06 | 1        | 1.30E-03   | 1.64E-15 | 6.69E-08    | 1.83E-11 |
| phe.Fasting_ | rs6881310 | S23 | ISL1 | rs149791570 | S5  | DIAPH1      | 4.12E-06 | 1        | 0.00210112 | 3.76E-15 | 1.53E-07    | 3.56E-11 |
| phe.Fasting_ | rs6881310 | S23 | ISL1 | rs150117838 | S8  | KPNA3       | 7.90E-16 | 3.23E-08 | 2.39E-12   | 5.14E-11 | 0.00209292  | 1.66E-07 |

|                       |     |      |                |             |          |          |            |          |             |            |
|-----------------------|-----|------|----------------|-------------|----------|----------|------------|----------|-------------|------------|
| phe.Fasting_rs6881310 | S23 | ISL1 | rs150452206S13 | "DIAPH1,LOC | 1.55E-05 | 1.00E+00 | 6.66E-03   | 1.69E-14 | 6.89E-07    | 1.40E-10   |
| phe.Fasting_rs6881310 | S23 | ISL1 | rs150675915S7  | DIAPH1      | 1.55E-05 | 1        | 6.66E-03   | 1.69E-14 | 6.89E-07    | 1.40E-10   |
| phe.Fasting_rs6881310 | S23 | ISL1 | rs150765570S7  | DIAPH1      | 1.55E-05 | 1.00E+00 | 6.66E-03   | 1.69E-14 | 6.89E-07    | 1.40E-10   |
| phe.Fasting_rs6881310 | S23 | ISL1 | rs150916187S4  | HIST1H2BK   | 3.36E-07 | 1.00E+00 | 2.30E-04   | 1.34E-09 | 0.0545788   | 3.07E-06   |
| phe.Fasting_rs6881310 | S23 | ISL1 | rs150992994S11 | "PCDHGA5,PI | 1.54E-05 | 1.00E+00 | 6.65E-03   | 3.21E-13 | 1.31E-05    | 1.75E-09   |
| phe.Fasting_rs6881310 | S23 | ISL1 | rs151204700S8  | DIAPH1      | 1.55E-05 | 1.00E+00 | 6.66E-03   | 1.69E-14 | 6.89E-07    | 1.40E-10   |
| phe.Fasting_rs6881310 | S23 | ISL1 | rs151330468S8  | DIAPH1      | 4.12E-06 | 1.00E+00 | 2.10E-03   | 4.03E-15 | 1.64E-07    | 3.77E-11   |
| phe.Fasting_rs6881310 | S23 | ISL1 | rs16894241 S4  | HIST1H2BK   | 5.28E-07 | 1.00E+00 | 3.45E-04   | 1.87E-09 | 0.0761417   | 4.15E-06   |
| phe.Fasting_rs6881310 | S23 | ISL1 | rs16908547 S8  | PAG1        | 7.25E-09 | 0.296014 | 6.95E-06   | 2.89E-06 | 1           | 0.00283884 |
| phe.Fasting_rs6881310 | S23 | ISL1 | rs180772028S8  | "DIAPH1,LOC | 1.55E-05 | 1.00E+00 | 6.66E-03   | 1.69E-14 | 6.89E-07    | 1.40E-10   |
| phe.Fasting_rs6881310 | S23 | ISL1 | rs181224861S7  | DIAPH1      | 1.55E-05 | 1.00E+00 | 6.66E-03   | 1.69E-14 | 6.89E-07    | 1.40E-10   |
| phe.Fasting_rs6881310 | S23 | ISL1 | rs181247960S21 | "PCDHGA9,PI | 2.58E-06 | 1        | 0.00139467 | 1.32E-13 | 5.39E-06    | 7.72E-10   |
| phe.Fasting_rs6881310 | S23 | ISL1 | rs181824655S21 | "PCDHGB6,PI | 2.58E-06 | 1.00E+00 | 1.39E-03   | 1.32E-13 | 5.39E-06    | 7.72E-10   |
| phe.Fasting_rs6881310 | S23 | ISL1 | rs182714699S8  | DIAPH1      | 1.55E-05 | 1.00E+00 | 6.66E-03   | 1.69E-14 | 6.89E-07    | 1.40E-10   |
| phe.Fasting_rs6881310 | S23 | ISL1 | rs182958142S8  | DIAPH1      | 9.56E-06 | 1        | 4.39E-03   | 2.93E-13 | 1.19E-05    | 1.60E-09   |
| phe.Fasting_rs6881310 | S23 | ISL1 | rs182965141S8  | DIAPH1      | 4.49E-06 | 1        | 0.00226769 | 9.21E-16 | 3.75E-08    | 1.16E-11   |
| phe.Fasting_rs6881310 | S23 | ISL1 | rs183597049S7  | DIAPH1      | 1.55E-05 | 1        | 0.00665749 | 1.69E-14 | 6.89E-07    | 1.40E-10   |
| phe.Fasting_rs6881310 | S23 | ISL1 | rs183980988S2  | NA          | 1.55E-05 | 1.00E+00 | 6.66E-03   | 1.69E-14 | 6.89E-07    | 1.40E-10   |
| phe.Fasting_rs6881310 | S23 | ISL1 | rs184233232S7  | DIAPH1      | 1.55E-05 | 1.00E+00 | 6.66E-03   | 1.69E-14 | 6.89E-07    | 1.40E-10   |
| phe.Fasting_rs6881310 | S23 | ISL1 | rs184509477S13 | "PCDHGB4,PI | 1.55E-05 | 1.00E+00 | 6.66E-03   | 1.69E-14 | 6.89E-07    | 1.40E-10   |
| phe.Fasting_rs6881310 | S23 | ISL1 | rs185069296S15 | "LOC1005056 | 1.55E-05 | 1        | 0.00665749 | 1.69E-14 | 6.89E-07    | 1.40E-10   |
| phe.Fasting_rs6881310 | S23 | ISL1 | rs185502834S8  | DIAPH1      | 4.12E-06 | 1.00E+00 | 2.10E-03   | 3.76E-15 | 1.53E-07    | 3.56E-11   |
| phe.Fasting_rs6881310 | S23 | ISL1 | rs185759881S7  | DIAPH1      | 1.55E-05 | 1.00E+00 | 6.66E-03   | 1.69E-14 | 6.89E-07    | 1.40E-10   |
| phe.Fasting_rs6881310 | S23 | ISL1 | rs186288044S21 | "PCDHGB4,PI | 2.58E-06 | 1.00E+00 | 1.39E-03   | 1.32E-13 | 5.39E-06    | 7.72E-10   |
| phe.Fasting_rs6881310 | S23 | ISL1 | rs187000011S11 | DIAPH1      | 1.55E-05 | 1.00E+00 | 6.66E-03   | 1.69E-14 | 6.89E-07    | 1.40E-10   |
| phe.Fasting_rs6881310 | S23 | ISL1 | rs188981295S5  | "RPS27AP10, | 1.55E-05 | 1.00E+00 | 6.66E-03   | 1.69E-14 | 6.89E-07    | 1.40E-10   |
| phe.Fasting_rs6881310 | S23 | ISL1 | rs190559574S7  | DIAPH1      | 4.12E-06 | 1.00E+00 | 2.10E-03   | 3.76E-15 | 1.53E-07    | 3.56E-11   |
| phe.Fasting_rs6881310 | S23 | ISL1 | rs191544043S8  | DIAPH1      | 1.55E-05 | 1.00E+00 | 6.66E-03   | 1.69E-14 | 6.89E-07    | 1.40E-10   |
| phe.Fasting_rs6881310 | S23 | ISL1 | rs191766712S7  | DIAPH1      | 1.55E-05 | 1        | 6.66E-03   | 1.69E-14 | 6.89E-07    | 1.40E-10   |
| phe.Fasting_rs6881310 | S23 | ISL1 | rs192690040S7  | DIAPH1      | 1.55E-05 | 1        | 6.66E-03   | 1.69E-14 | 6.89E-07    | 1.40E-10   |
| phe.Fasting_rs6881310 | S23 | ISL1 | rs192765219S7  | DIAPH1      | 1.55E-05 | 1        | 6.66E-03   | 1.69E-14 | 6.89E-07    | 1.40E-10   |
| phe.Fasting_rs6881310 | S23 | ISL1 | rs192770525S7  | DIAPH1      | 1.55E-05 | 1        | 6.66E-03   | 1.69E-14 | 6.89E-07    | 1.40E-10   |
| phe.Fasting_rs6881310 | S23 | ISL1 | rs2285645 S7   | MTMR3       | 5.57E-07 | 1        | 3.62E-04   | 2.92E-12 | 0.000118705 | 1.24E-08   |
| phe.Fasting_rs6881310 | S23 | ISL1 | rs2924507 S5   | ZC3H3       | 7.81E-08 | 1        | 6.10E-05   | 3.45E-09 | 0.140598    | 7.21E-06   |
| phe.Fasting_rs6881310 | S23 | ISL1 | rs2924508 S8   | ZC3H3       | 7.81E-08 | 1.00E+00 | 6.10E-05   | 5.14E-09 | 0.209184    | 1.02E-05   |
| phe.Fasting_rs6881310 | S23 | ISL1 | rs2924511 S7   | ZC3H3       | 7.81E-08 | 1        | 6.10E-05   | 3.04E-09 | 0.123648    | 6.44E-06   |
| phe.Fasting_rs6881310 | S23 | ISL1 | rs2924512 S7   | ZC3H3       | 8.33E-08 | 1        | 6.47E-05   | 3.71E-09 | 0.151154    | 7.67E-06   |
| phe.Fasting_rs6881310 | S23 | ISL1 | rs2956376 S8   | ZC3H3       | 7.81E-08 | 1        | 6.10E-05   | 1.96E-09 | 0.0798564   | 4.34E-06   |
| phe.Fasting_rs6881310 | S23 | ISL1 | rs2980270 S7   | ZC3H3       | 7.81E-08 | 1        | 6.10E-05   | 1.96E-09 | 0.0798564   | 4.34E-06   |
| phe.Fasting_rs6881310 | S23 | ISL1 | rs2980272 S7   | ZC3H3       | 8.33E-08 | 1.00E+00 | 6.47E-05   | 3.94E-09 | 0.160402    | 8.10E-06   |

|                       |     |      |             |     |             |          |             |             |          |             |             |
|-----------------------|-----|------|-------------|-----|-------------|----------|-------------|-------------|----------|-------------|-------------|
| phe.Fasting_rs6881310 | S23 | ISL1 | rs2980275   | S5  | ZC3H3       | 7.81E-08 | 1.00E+00    | 6.10E-05    | 3.45E-09 | 0.140598    | 7.21E-06    |
| phe.Fasting_rs6881310 | S23 | ISL1 | rs34801978  | S3  | HOXB2       | 3.28E-06 | 1           | 0.00171478  | 2.16E-06 | 1           | 0.00221464  |
| phe.Fasting_rs6881310 | S23 | ISL1 | rs35990401  | S7  | DIAPH1      | 1.35E-05 | 1.00E+00    | 5.93E-03    | 6.19E-15 | 2.52E-07    | 5.60E-11    |
| phe.Fasting_rs6881310 | S23 | ISL1 | rs366767    | S5  | ZC3H3       | 1.16E-07 | 1.00E+00    | 8.72E-05    | 2.08E-09 | 0.084631    | 4.58E-06    |
| phe.Fasting_rs6881310 | S23 | ISL1 | rs55900860  | S7  | DIAPH1      | 4.12E-06 | 1.00E+00    | 2.10E-03    | 3.76E-15 | 1.53E-07    | 3.56E-11    |
| phe.Fasting_rs6881310 | S23 | ISL1 | rs57503635  | S3  | NA          | 1.73E-12 | 7.08E-05    | 3.32E-09    | 7.11E-11 | 0.00289423  | 2.23E-07    |
| phe.Fasting_rs6881310 | S23 | ISL1 | rs60011869  | S16 | NA          | 2.76E-06 | 1.00E+00    | 1.47E-03    | 3.06E-12 | 0.000124556 | 1.30E-08    |
| phe.Fasting_rs6881310 | S23 | ISL1 | rs7004597   | S8  | NA          | 2.20E-15 | 9.00E-08    | 6.24E-12    | 1.64E-07 | 1           | 0.000221462 |
| phe.Fasting_rs6881310 | S23 | ISL1 | rs7256517   | S7  | CYTH2       | 9.67E-07 | 1           | 5.88E-04    | 8.17E-16 | 3.33E-08    | 1.16E-11    |
| phe.Fasting_rs6881310 | S23 | ISL1 | rs73283603  | S7  | ZWINT       | 2.97E-16 | 1.21E-08    | 9.90E-13    | 5.59E-16 | 2.27E-08    | 1.16E-11    |
| phe.Fasting_rs6881310 | S23 | ISL1 | rs73392640  | S8  | POLR3B      | 4.53E-16 | 1.85E-08    | 1.45E-12    | 2.41E-07 | 1           | 0.00031174  |
| phe.Fasting_rs6881310 | S23 | ISL1 | rs73794928  | S13 | "PCDHGA9,Pi | 4.13E-06 | 1           | 0.00210495  | 2.99E-14 | 1.22E-06    | 2.23E-10    |
| phe.Fasting_rs6881310 | S23 | ISL1 | rs74627895  | S8  | TMEM64      | 3.20E-17 | 1.31E-09    | 1.80E-13    | 2.24E-08 | 0.913467    | 3.76E-05    |
| phe.Fasting_rs6881310 | S23 | ISL1 | rs74701059  | S24 | C17orf102   | 1.98E-07 | 1           | 0.000140938 | 2.82E-09 | 0.114682    | 5.99E-06    |
| phe.Fasting_rs6881310 | S23 | ISL1 | rs74914207  | S24 | NA          | 1.41E-11 | 0.000575814 | 2.18E-08    | 3.92E-08 | 1           | 6.15E-05    |
| phe.Fasting_rs6881310 | S23 | ISL1 | rs75350765  | S5  | RCL1        | 7.36E-17 | 3.01E-09    | 3.30E-13    | 5.29E-16 | 2.16E-08    | 1.16E-11    |
| phe.Fasting_rs6881310 | S23 | ISL1 | rs75374128  | S5  | CNTLN       | 3.35E-17 | 1.37E-09    | 1.87E-13    | 1.33E-07 | 1           | 0.000182869 |
| phe.Fasting_rs6881310 | S23 | ISL1 | rs75758702  | S24 | NA          | 1.62E-17 | 6.61E-10    | 1.24E-13    | 1.39E-17 | 5.67E-10    | 2.12E-12    |
| phe.Fasting_rs6881310 | S23 | ISL1 | rs75864203  | S8  | CNTLN       | 3.35E-17 | 1.37E-09    | 1.87E-13    | 1.33E-07 | 1           | 0.000182869 |
| phe.Fasting_rs6881310 | S23 | ISL1 | rs75949566  | S5  | TMEM64      | 1.11E-16 | 4.52E-09    | 4.65E-13    | 4.23E-12 | 0.000172242 | 1.70E-08    |
| phe.Fasting_rs6881310 | S23 | ISL1 | rs76844308  | S8  | CNTLN       | 2.08E-06 | 1.00E+00    | 1.16E-03    | 8.33E-10 | 0.0339059   | 2.02E-06    |
| phe.Fasting_rs6881310 | S23 | ISL1 | rs7763107   | S8  | FARS2       | 5.29E-07 | 1.00E+00    | 3.45E-04    | 3.62E-13 | 1.48E-05    | 1.96E-09    |
| phe.Fasting_rs6881310 | S23 | ISL1 | rs77798597  | S7  | KPNA3       | 7.90E-16 | 3.23E-08    | 2.39E-12    | 5.14E-11 | 0.00209292  | 1.66E-07    |
| phe.Fasting_rs6881310 | S23 | ISL1 | rs77845645  | S21 | NA          | 5.07E-13 | 2.07E-05    | 1.07E-09    | 1.13E-15 | 4.59E-08    | 1.30E-11    |
| phe.Fasting_rs6881310 | S23 | ISL1 | rs78353402  | S8  | AP3M2       | 2.20E-15 | 9.00E-08    | 6.24E-12    | 2.75E-07 | 1           | 0.000350345 |
| phe.Fasting_rs6881310 | S23 | ISL1 | rs78516788  | S8  | SLC38A1     | 3.89E-17 | 1.59E-09    | 2.09E-13    | 1.21E-08 | 0.492153    | 2.20E-05    |
| phe.Fasting_rs6881310 | S23 | ISL1 | rs78697063  | S5  | MSI2        | 1.75E-19 | 7.13E-12    | 2.40E-14    | 5.76E-12 | 0.000234647 | 2.25E-08    |
| phe.Fasting_rs6881310 | S23 | ISL1 | rs78722272  | S5  | CNTLN       | 3.35E-17 | 1.37E-09    | 1.87E-13    | 1.33E-07 | 1           | 0.000183176 |
| phe.Fasting_rs6881310 | S23 | ISL1 | rs78736524  | S5  | KPNA3       | 7.90E-16 | 3.23E-08    | 2.39E-12    | 5.45E-11 | 0.00221813  | 1.75E-07    |
| phe.Fasting_rs6881310 | S23 | ISL1 | rs78990344  | S2  | LOC1005063! | 1.08E-16 | 4.40E-09    | 4.54E-13    | 2.68E-12 | 0.000109081 | 1.15E-08    |
| phe.Fasting_rs6881310 | S23 | ISL1 | rs79517926  | S15 | "DIAPH1,LOC | 3.91E-06 | 1           | 2.00E-03    | 6.36E-15 | 2.59E-07    | 5.75E-11    |
| phe.Fasting_rs6881310 | S23 | ISL1 | rs79703349  | S24 | C17orf102   | 1.98E-07 | 1           | 0.000140938 | 3.37E-09 | 0.13698     | 7.06E-06    |
| phe.Fasting_rs6881310 | S23 | ISL1 | rs79781495  | S8  | KPNA3       | 7.90E-16 | 3.23E-08    | 2.39E-12    | 5.14E-11 | 0.00209292  | 1.66E-07    |
| phe.Fasting_rs6881310 | S23 | ISL1 | rs79886603  | S15 | NA          | 1.07E-06 | 1           | 6.42E-04    | 2.02E-07 | 1           | 0.000266966 |
| phe.Fasting_rs6881310 | S23 | ISL1 | rs80332465  | S5  | KPNA3       | 8.53E-16 | 3.48E-08    | 2.55E-12    | 5.35E-11 | 0.00217737  | 1.72E-07    |
| phe.Fasting_rs6881310 | S23 | ISL1 | rs80334773  | S5  | KPNA3       | 8.53E-16 | 3.48E-08    | 2.55E-12    | 5.35E-11 | 0.00217737  | 1.72E-07    |
| phe.Fasting_rs6881310 | S23 | ISL1 | rs8075478   | S8  | MYH10       | 1.46E-06 | 1           | 8.49E-04    | 1.01E-16 | 4.10E-09    | 5.63E-12    |
| phe.Fasting_rs6881310 | S23 | ISL1 | rs9620939   | S7  | MTMR3       | 5.93E-07 | 1.00E+00    | 3.83E-04    | 7.51E-14 | 3.06E-06    | 5.03E-10    |
| phe.Fasting_rs6881310 | S23 | ISL1 | rs9625903   | S7  | MTMR3       | 6.69E-07 | 1.00E+00    | 4.25E-04    | 1.16E-11 | 0.000473376 | 4.27E-08    |
| phe.Fasting_rs6964407 | S7  | POR  | rs141926074 | S8  | ATE1        | 3.19E-13 | 1.30E-05    | 6.82E-10    | 3.81E-07 | 1           | 0.000470125 |



|                       |    |       |             |     |             |          |           |             |          |             |             |
|-----------------------|----|-------|-------------|-----|-------------|----------|-----------|-------------|----------|-------------|-------------|
| phe.Fasting_rs6970543 | S8 | COPG2 | rs116079984 | S8  | KPNA3       | 5.27E-06 | 1.00E+00  | 2.61E-03    | 6.85E-10 | 0.0278995   | 1.71E-06    |
| phe.Fasting_rs6970543 | S8 | COPG2 | rs74627895  | S8  | TMEM64      | 1.77E-10 | 7.23E-03  | 2.21E-07    | 8.82E-06 | 1           | 0.00736401  |
| phe.Fasting_rs6970856 | S8 | COPG2 | rs116079984 | S8  | KPNA3       | 5.27E-06 | 1.00E+00  | 2.61E-03    | 6.85E-10 | 0.0278995   | 1.71E-06    |
| phe.Fasting_rs6970856 | S8 | COPG2 | rs74627895  | S8  | TMEM64      | 1.77E-10 | 7.23E-03  | 2.21E-07    | 8.82E-06 | 1           | 0.00736401  |
| phe.Fasting_rs6992853 | S8 | UBE2W | rs139070959 | S8  | RPN2        | 1.05E-06 | 1.00E+00  | 6.31E-04    | 1.95E-07 | 1           | 0.000258319 |
| phe.Fasting_rs6992853 | S8 | UBE2W | rs145412529 | S8  | "RBL1,RPS3A | 5.32E-07 | 1.00E+00  | 3.47E-04    | 1.37E-06 | 1           | 0.00149555  |
| phe.Fasting_rs6997898 | S5 | UBE2W | rs139070959 | S8  | RPN2        | 1.18E-06 | 1         | 7.01E-04    | 2.28E-07 | 1           | 0.0002973   |
| phe.Fasting_rs6997898 | S5 | UBE2W | rs145412529 | S8  | "RBL1,RPS3A | 6.02E-07 | 1         | 0.000387852 | 1.61E-06 | 1           | 1.72E-03    |
| phe.Fasting_rs7004597 | S8 | NA    | rs111576333 | S5  | TMEM64      | 1.38E-15 | 5.65E-08  | 3.99E-12    | 4.12E-08 | 1           | 6.44E-05    |
| phe.Fasting_rs7004597 | S8 | NA    | rs112091318 | S5  | TMEM64      | 3.67E-16 | 1.50E-08  | 1.20E-12    | 1.56E-08 | 0.635167    | 2.76E-05    |
| phe.Fasting_rs7004597 | S8 | NA    | rs11989304  | S4  | TMEM64      | 1.38E-15 | 5.65E-08  | 3.99E-12    | 8.30E-07 | 1           | 9.52E-04    |
| phe.Fasting_rs7004597 | S8 | NA    | rs141926074 | S8  | ATE1        | 5.12E-17 | 2.09E-09  | 2.51E-13    | 2.02E-08 | 0.823675    | 3.47E-05    |
| phe.Fasting_rs7004597 | S8 | NA    | rs1470889   | S5  | ZC3H3       | 4.41E-09 | 1.80E-01  | 4.35E-06    | 2.32E-07 | 1           | 0.000302135 |
| phe.Fasting_rs7004597 | S8 | NA    | rs1470890   | S5  | ZC3H3       | 4.41E-09 | 1.80E-01  | 4.35E-06    | 2.32E-07 | 1           | 0.000302135 |
| phe.Fasting_rs7004597 | S8 | NA    | rs2924507   | S5  | ZC3H3       | 4.41E-09 | 1.80E-01  | 4.35E-06    | 2.32E-07 | 1           | 0.000302135 |
| phe.Fasting_rs7004597 | S8 | NA    | rs2924508   | S8  | ZC3H3       | 4.41E-09 | 1.80E-01  | 4.35E-06    | 6.24E-09 | 0.253966    | 1.21E-05    |
| phe.Fasting_rs7004597 | S8 | NA    | rs2924511   | S7  | ZC3H3       | 4.41E-09 | 1.80E-01  | 4.35E-06    | 2.06E-07 | 1           | 0.000270958 |
| phe.Fasting_rs7004597 | S8 | NA    | rs2924512   | S7  | ZC3H3       | 4.92E-09 | 2.01E-01  | 4.82E-06    | 2.64E-07 | 1           | 0.000338872 |
| phe.Fasting_rs7004597 | S8 | NA    | rs2956376   | S8  | ZC3H3       | 4.41E-09 | 1.80E-01  | 4.35E-06    | 1.41E-07 | 1           | 0.000192999 |
| phe.Fasting_rs7004597 | S8 | NA    | rs2980270   | S7  | ZC3H3       | 4.41E-09 | 0.180281  | 4.35E-06    | 1.41E-07 | 1           | 0.000192999 |
| phe.Fasting_rs7004597 | S8 | NA    | rs2980272   | S7  | ZC3H3       | 4.92E-09 | 0.201     | 4.82E-06    | 2.82E-07 | 1           | 0.000358683 |
| phe.Fasting_rs7004597 | S8 | NA    | rs2980275   | S5  | ZC3H3       | 4.41E-09 | 0.180281  | 4.35E-06    | 2.32E-07 | 1           | 0.000302135 |
| phe.Fasting_rs7004597 | S8 | NA    | rs366767    | S5  | ZC3H3       | 8.73E-09 | 0.356487  | 8.25E-06    | 1.59E-07 | 1           | 0.000215224 |
| phe.Fasting_rs7004597 | S8 | NA    | rs73283603  | S7  | ZWINT       | 9.00E-13 | 3.68E-05  | 1.86E-09    | 1.37E-06 | 1           | 0.00149723  |
| phe.Fasting_rs7004597 | S8 | NA    | rs73392640  | S8  | POLR3B      | 9.66E-15 | 3.94E-07  | 2.46E-11    | 2.51E-08 | 1           | 4.13E-05    |
| phe.Fasting_rs7004597 | S8 | NA    | rs73619637  | S8  | NA          | 3.31E-14 | 1.35E-06  | 8.02E-11    | 3.71E-11 | 0.00151073  | 1.23E-07    |
| phe.Fasting_rs7004597 | S8 | NA    | rs74627895  | S8  | TMEM64      | 3.67E-16 | 1.50E-08  | 1.20E-12    | 1.37E-07 | 1           | 0.000188745 |
| phe.Fasting_rs7004597 | S8 | NA    | rs75949566  | S5  | TMEM64      | 1.70E-15 | 6.95E-08  | 4.87E-12    | 1.03E-06 | 1           | 0.00116391  |
| phe.Fasting_rs7004597 | S8 | NA    | rs78990344  | S2  | LOC10050631 | 1.38E-15 | 5.65E-08  | 3.99E-12    | 8.30E-07 | 1           | 0.000952346 |
| phe.Fasting_rs7004597 | S8 | NA    | rs8075478   | S8  | MYH10       | 3.01E-10 | 0.0122872 | 3.60E-07    | 7.47E-07 | 1           | 0.000865527 |
| phe.Fasting_rs717886  | S8 | NA    | rs115083290 | S19 | NA          | 2.37E-10 | 9.66E-03  | 2.89E-07    | 3.49E-10 | 0.0142173   | 9.25E-07    |
| phe.Fasting_rs717886  | S8 | NA    | rs115752779 | S19 | NA          | 2.37E-10 | 9.66E-03  | 2.89E-07    | 3.49E-10 | 0.0142173   | 9.25E-07    |
| phe.Fasting_rs717886  | S8 | NA    | rs116279995 | S20 | "PCDHGA4,Pi | 2.85E-15 | 1.16E-07  | 7.96E-12    | 4.98E-06 | 1           | 0.00455644  |
| phe.Fasting_rs717886  | S8 | NA    | rs141692339 | S3  | "PCDHGA6,Pi | 3.74E-15 | 1.53E-07  | 1.00E-11    | 7.70E-12 | 0.000313295 | 2.92E-08    |
| phe.Fasting_rs717886  | S8 | NA    | rs141926074 | S8  | ATE1        | 4.10E-10 | 1.67E-02  | 4.76E-07    | 6.94E-06 | 1           | 0.0060223   |
| phe.Fasting_rs717886  | S8 | NA    | rs147506725 | S21 | "PCDHGA1,Pi | 2.85E-15 | 1.16E-07  | 7.96E-12    | 4.98E-06 | 1           | 0.00455644  |
| phe.Fasting_rs717886  | S8 | NA    | rs149553852 | S21 | "PCDHGA10,I | 2.85E-15 | 1.16E-07  | 7.96E-12    | 4.98E-06 | 1           | 0.00455644  |
| phe.Fasting_rs717886  | S8 | NA    | rs149716949 | S5  | DIAPH1      | 2.43E-15 | 9.92E-08  | 6.83E-12    | 3.51E-06 | 1           | 0.00335853  |
| phe.Fasting_rs717886  | S8 | NA    | rs150992994 | S11 | "PCDHGA5,Pi | 3.75E-14 | 1.53E-06  | 9.03E-11    | 1.81E-11 | 0.000737294 | 6.46E-08    |
| phe.Fasting_rs717886  | S8 | NA    | rs181247960 | S21 | "PCDHGA9,Pi | 2.85E-15 | 1.16E-07  | 7.96E-12    | 4.98E-06 | 1           | 0.00455644  |

|                        |    |      |                 |              |          |             |          |          |             |             |
|------------------------|----|------|-----------------|--------------|----------|-------------|----------|----------|-------------|-------------|
| phe.Fasting_rs717886   | S8 | NA   | rs181824655 S21 | "PCDHGB6,PI  | 2.85E-15 | 1.16E-07    | 7.96E-12 | 4.98E-06 | 1           | 4.56E-03    |
| phe.Fasting_rs717886   | S8 | NA   | rs182958142 S8  | DIAPH1       | 2.36E-14 | 9.64E-07    | 5.82E-11 | 8.05E-06 | 1           | 0.00681413  |
| phe.Fasting_rs717886   | S8 | NA   | rs186288044 S21 | "PCDHGB4,PI  | 2.85E-15 | 1.16E-07    | 7.96E-12 | 4.98E-06 | 1           | 0.00455644  |
| phe.Fasting_rs717886   | S8 | NA   | rs35990401 S7   | DIAPH1       | 3.14E-14 | 1.28E-06    | 7.63E-11 | 7.84E-06 | 1           | 6.66E-03    |
| phe.Fasting_rs717886   | S8 | NA   | rs60011869 S16  | NA           | 8.75E-12 | 0.00035731  | 1.45E-08 | 1.55E-09 | 0.0630543   | 3.51E-06    |
| phe.Fasting_rs717886   | S8 | NA   | rs73392640 S8   | POLR3B       | 1.23E-10 | 5.02E-03    | 1.57E-07 | 6.92E-09 | 0.281781    | 1.34E-05    |
| phe.Fasting_rs717886   | S8 | NA   | rs73794928 S13  | "PCDHGA9,PI  | 8.04E-15 | 3.28E-07    | 2.06E-11 | 1.76E-06 | 1           | 0.00185052  |
| phe.Fasting_rs718215   | S8 | NA   | rs115083290 S19 | NA           | 7.46E-14 | 3.04E-06    | 1.72E-10 | 3.54E-10 | 0.0144294   | 9.38E-07    |
| phe.Fasting_rs718215   | S8 | NA   | rs115752779 S19 | NA           | 7.46E-14 | 3.04E-06    | 1.72E-10 | 3.54E-10 | 0.0144294   | 9.38E-07    |
| phe.Fasting_rs718215   | S8 | NA   | rs116279995 S20 | "PCDHGA4,PI  | 3.06E-15 | 1.25E-07    | 8.36E-12 | 5.03E-06 | 1           | 0.0045964   |
| phe.Fasting_rs718215   | S8 | NA   | rs13400525 S8   | MFF          | 7.21E-14 | 2.94E-06    | 1.67E-10 | 3.61E-06 | 1           | 0.00344454  |
| phe.Fasting_rs718215   | S8 | NA   | rs141692339 S3  | "PCDHGA6,PI  | 4.01E-15 | 1.64E-07    | 1.06E-11 | 7.80E-12 | 0.000317304 | 2.96E-08    |
| phe.Fasting_rs718215   | S8 | NA   | rs141926074 S8  | ATE1         | 4.42E-10 | 0.0180591   | 5.09E-07 | 1.86E-08 | 0.757888    | 3.23E-05    |
| phe.Fasting_rs718215   | S8 | NA   | rs1470889 S5    | ZC3H3        | 4.83E-11 | 0.00197183  | 6.56E-08 | 7.30E-07 | 1           | 0.000847673 |
| phe.Fasting_rs718215   | S8 | NA   | rs1470890 S5    | ZC3H3        | 4.83E-11 | 0.00197183  | 6.56E-08 | 7.30E-07 | 1           | 0.000847673 |
| phe.Fasting_rs718215   | S8 | NA   | rs147506725 S21 | "PCDHGA1,PI  | 3.06E-15 | 1.25E-07    | 8.36E-12 | 5.03E-06 | 1           | 0.0045964   |
| phe.Fasting_rs718215   | S8 | NA   | rs149553852 S21 | "PCDHGA10,PI | 3.06E-15 | 1.25E-07    | 8.36E-12 | 5.03E-06 | 1           | 0.0045964   |
| phe.Fasting_rs718215   | S8 | NA   | rs149716949 S5  | DIAPH1       | 2.62E-15 | 1.07E-07    | 7.35E-12 | 3.56E-06 | 1           | 0.00340405  |
| phe.Fasting_rs718215   | S8 | NA   | rs150992994 S11 | "PCDHGA5,PI  | 4.01E-14 | 1.64E-06    | 9.63E-11 | 1.84E-11 | 0.000747904 | 6.55E-08    |
| phe.Fasting_rs718215   | S8 | NA   | rs181247960 S21 | "PCDHGA9,PI  | 3.06E-15 | 1.25E-07    | 8.36E-12 | 5.03E-06 | 1           | 0.0045964   |
| phe.Fasting_rs718215   | S8 | NA   | rs181824655 S21 | "PCDHGB6,PI  | 3.06E-15 | 1.25E-07    | 8.36E-12 | 5.03E-06 | 1           | 0.0045964   |
| phe.Fasting_rs718215   | S8 | NA   | rs182958142 S8  | DIAPH1       | 2.53E-14 | 1.03E-06    | 6.21E-11 | 8.14E-06 | 1           | 0.00688524  |
| phe.Fasting_rs718215   | S8 | NA   | rs186288044 S21 | "PCDHGB4,PI  | 3.06E-15 | 1.25E-07    | 8.36E-12 | 5.03E-06 | 1           | 0.0045964   |
| phe.Fasting_rs718215   | S8 | NA   | rs2924507 S5    | ZC3H3        | 4.83E-11 | 1.97E-03    | 6.56E-08 | 7.30E-07 | 1           | 0.000847673 |
| phe.Fasting_rs718215   | S8 | NA   | rs2924508 S8    | ZC3H3        | 4.83E-11 | 1.97E-03    | 6.56E-08 | 1.33E-06 | 1           | 0.00145629  |
| phe.Fasting_rs718215   | S8 | NA   | rs2924511 S7    | ZC3H3        | 4.83E-11 | 0.00197183  | 6.56E-08 | 6.58E-07 | 1           | 0.000770693 |
| phe.Fasting_rs718215   | S8 | NA   | rs2924512 S7    | ZC3H3        | 4.95E-11 | 2.02E-03    | 6.69E-08 | 8.23E-07 | 1           | 9.45E-04    |
| phe.Fasting_rs718215   | S8 | NA   | rs2956376 S8    | ZC3H3        | 4.83E-11 | 1.97E-03    | 6.56E-08 | 3.57E-07 | 1           | 0.000443108 |
| phe.Fasting_rs718215   | S8 | NA   | rs2980270 S7    | ZC3H3        | 4.83E-11 | 1.97E-03    | 6.56E-08 | 3.57E-07 | 1           | 0.000443108 |
| phe.Fasting_rs718215   | S8 | NA   | rs2980272 S7    | ZC3H3        | 4.95E-11 | 2.02E-03    | 6.69E-08 | 8.53E-07 | 1           | 0.000977116 |
| phe.Fasting_rs718215   | S8 | NA   | rs2980275 S5    | ZC3H3        | 4.83E-11 | 1.97E-03    | 6.56E-08 | 7.30E-07 | 1           | 0.000847673 |
| phe.Fasting_rs718215   | S8 | NA   | rs35990401 S7   | DIAPH1       | 3.37E-14 | 1.37E-06    | 8.15E-11 | 7.93E-06 | 1           | 0.00672732  |
| phe.Fasting_rs718215   | S8 | NA   | rs366767 S5     | ZC3H3        | 8.46E-11 | 0.00345494  | 1.11E-07 | 4.06E-07 | 1           | 0.000494584 |
| phe.Fasting_rs718215   | S8 | NA   | rs60011869 S16  | NA           | 9.46E-12 | 0.000386498 | 1.52E-08 | 1.16E-13 | 4.71E-06    | 7.06E-10    |
| phe.Fasting_rs718215   | S8 | NA   | rs73392640 S8   | POLR3B       | 1.31E-10 | 5.35E-03    | 1.66E-07 | 6.99E-09 | 0.28434     | 1.35E-05    |
| phe.Fasting_rs718215   | S8 | NA   | rs73794928 S13  | "PCDHGA9,PI  | 8.61E-15 | 3.52E-07    | 2.20E-11 | 1.77E-06 | 1           | 0.00186217  |
| phe.Fasting_rs718215   | S8 | NA   | rs76737663 S1   | LOC654841    | 9.17E-09 | 3.74E-01    | 8.63E-06 | 1.26E-05 | 1           | 0.00972681  |
| phe.Fasting_rs72895328 | S7 | AAK1 | rs114334325 S7  | AP3M2        | 3.17E-08 | 1.00E+00    | 2.71E-05 | 1.01E-09 | 0.0413052   | 2.41E-06    |
| phe.Fasting_rs72895328 | S7 | AAK1 | rs114394395 S7  | AP3M2        | 3.31E-08 | 1.00E+00    | 2.82E-05 | 1.01E-09 | 0.0413052   | 2.41E-06    |
| phe.Fasting_rs72895328 | S7 | AAK1 | rs116406581 S2  | NA           | 1.81E-07 | 1.00E+00    | 1.30E-04 | 4.89E-11 | 0.00199003  | 1.58E-07    |

|                           |      |                 |             |          |          |             |          |             |          |
|---------------------------|------|-----------------|-------------|----------|----------|-------------|----------|-------------|----------|
| phe.Fasting_rs72895328 S7 | AAK1 | rs116696844 S3  | AP3M2       | 3.79E-08 | 1.00E+00 | 3.18E-05    | 1.01E-09 | 0.0413052   | 2.41E-06 |
| phe.Fasting_rs72895328 S7 | AAK1 | rs138136869 S7  | DIAPH1      | 2.11E-05 | 1.00E+00 | 8.75E-03    | 2.44E-09 | 0.099364    | 5.28E-06 |
| phe.Fasting_rs72895328 S7 | AAK1 | rs138457103 S10 | DIAPH1      | 1.92E-05 | 1        | 8.06E-03    | 1.00E-08 | 0.4075      | 1.86E-05 |
| phe.Fasting_rs72895328 S7 | AAK1 | rs139403963 S8  | DIAPH1      | 2.11E-05 | 1        | 8.75E-03    | 2.44E-09 | 0.099364    | 5.28E-06 |
| phe.Fasting_rs72895328 S7 | AAK1 | rs139828110 S8  | DIAPH1      | 2.11E-05 | 1        | 8.75E-03    | 2.44E-09 | 0.099364    | 5.28E-06 |
| phe.Fasting_rs72895328 S7 | AAK1 | rs142789100 S8  | DIAPH1      | 2.11E-05 | 1        | 8.75E-03    | 2.44E-09 | 0.099364    | 5.28E-06 |
| phe.Fasting_rs72895328 S7 | AAK1 | rs142812798 S7  | DIAPH1      | 2.11E-05 | 1        | 8.75E-03    | 2.44E-09 | 0.099364    | 5.28E-06 |
| phe.Fasting_rs72895328 S7 | AAK1 | rs143377827 S13 | "DIAPH1,LOC | 3.59E-06 | 1        | 0.00185741  | 1.44E-09 | 0.0586058   | 3.28E-06 |
| phe.Fasting_rs72895328 S7 | AAK1 | rs143691978 S11 | DIAPH1      | 2.11E-05 | 1.00E+00 | 8.75E-03    | 2.45E-09 | 0.099758    | 5.29E-06 |
| phe.Fasting_rs72895328 S7 | AAK1 | rs144081334 S11 | DIAPH1      | 2.11E-05 | 1        | 0.00874719  | 2.45E-09 | 0.099758    | 5.29E-06 |
| phe.Fasting_rs72895328 S7 | AAK1 | rs145027704 S11 | DIAPH1      | 2.11E-05 | 1        | 8.75E-03    | 2.45E-09 | 0.099758    | 5.29E-06 |
| phe.Fasting_rs72895328 S7 | AAK1 | rs146622060 S13 | DIAPH1      | 2.11E-05 | 1.00E+00 | 8.75E-03    | 2.45E-09 | 0.099758    | 5.29E-06 |
| phe.Fasting_rs72895328 S7 | AAK1 | rs147417996 S7  | DIAPH1      | 2.11E-05 | 1.00E+00 | 8.75E-03    | 2.45E-09 | 0.099758    | 5.29E-06 |
| phe.Fasting_rs72895328 S7 | AAK1 | rs147677041 S8  | DIAPH1      | 2.11E-05 | 1.00E+00 | 8.75E-03    | 2.44E-09 | 0.099364    | 5.28E-06 |
| phe.Fasting_rs72895328 S7 | AAK1 | rs149019627 S8  | DIAPH1      | 2.11E-05 | 1.00E+00 | 8.75E-03    | 2.44E-09 | 0.099364    | 5.28E-06 |
| phe.Fasting_rs72895328 S7 | AAK1 | rs149791570 S5  | DIAPH1      | 2.11E-05 | 1.00E+00 | 8.75E-03    | 2.44E-09 | 0.099364    | 5.28E-06 |
| phe.Fasting_rs72895328 S7 | AAK1 | rs151330468 S8  | DIAPH1      | 2.11E-05 | 1        | 8.75E-03    | 2.45E-09 | 0.099758    | 5.29E-06 |
| phe.Fasting_rs72895328 S7 | AAK1 | rs182965141 S8  | DIAPH1      | 2.31E-05 | 1        | 9.45E-03    | 8.02E-10 | 0.0326295   | 1.96E-06 |
| phe.Fasting_rs72895328 S7 | AAK1 | rs185502834 S8  | DIAPH1      | 2.11E-05 | 1        | 0.00874719  | 2.44E-09 | 0.099364    | 5.28E-06 |
| phe.Fasting_rs72895328 S7 | AAK1 | rs190559574 S7  | DIAPH1      | 2.11E-05 | 1        | 0.00874719  | 2.44E-09 | 0.099364    | 5.28E-06 |
| phe.Fasting_rs72895328 S7 | AAK1 | rs55900860 S7   | DIAPH1      | 2.11E-05 | 1.00E+00 | 8.75E-03    | 2.44E-09 | 0.099364    | 5.28E-06 |
| phe.Fasting_rs72895328 S7 | AAK1 | rs7004597 S8    | NA          | 3.17E-08 | 1        | 2.71E-05    | 3.12E-10 | 0.0127112   | 8.41E-07 |
| phe.Fasting_rs72895328 S7 | AAK1 | rs78353402 S8   | AP3M2       | 3.17E-08 | 1        | 2.71E-05    | 1.01E-09 | 0.0413052   | 2.41E-06 |
| phe.Fasting_rs72895328 S7 | AAK1 | rs79517926 S15  | "DIAPH1,LOC | 1.52E-05 | 1        | 0.00657313  | 1.13E-11 | 0.000458886 | 4.14E-08 |
| phe.Fasting_rs72895346 S8 | AAK1 | rs114334325 S7  | AP3M2       | 3.34E-08 | 1        | 2.85E-05    | 8.04E-10 | 0.0327298   | 1.96E-06 |
| phe.Fasting_rs72895346 S8 | AAK1 | rs114394395 S7  | AP3M2       | 3.49E-08 | 1        | 2.96E-05    | 8.04E-10 | 0.0327298   | 1.96E-06 |
| phe.Fasting_rs72895346 S8 | AAK1 | rs116406581 S2  | NA          | 1.90E-07 | 1        | 0.000136036 | 3.84E-11 | 0.00156462  | 1.27E-07 |
| phe.Fasting_rs72895346 S8 | AAK1 | rs116696844 S3  | AP3M2       | 4.00E-08 | 1.00E+00 | 3.35E-05    | 8.04E-10 | 0.0327298   | 1.96E-06 |
| phe.Fasting_rs72895346 S8 | AAK1 | rs138136869 S7  | DIAPH1      | 2.34E-05 | 1        | 0.0095427   | 2.13E-09 | 0.0865169   | 4.67E-06 |
| phe.Fasting_rs72895346 S8 | AAK1 | rs138457103 S10 | DIAPH1      | 2.16E-05 | 1.00E+00 | 8.91E-03    | 8.51E-09 | 0.346282    | 1.61E-05 |
| phe.Fasting_rs72895346 S8 | AAK1 | rs139403963 S8  | DIAPH1      | 2.34E-05 | 1.00E+00 | 9.54E-03    | 2.13E-09 | 0.0865169   | 4.67E-06 |
| phe.Fasting_rs72895346 S8 | AAK1 | rs139828110 S8  | DIAPH1      | 2.34E-05 | 1        | 0.0095427   | 2.13E-09 | 0.0865169   | 4.67E-06 |
| phe.Fasting_rs72895346 S8 | AAK1 | rs142789100 S8  | DIAPH1      | 2.34E-05 | 1.00E+00 | 9.54E-03    | 2.13E-09 | 0.0865169   | 4.67E-06 |
| phe.Fasting_rs72895346 S8 | AAK1 | rs142812798 S7  | DIAPH1      | 2.34E-05 | 1.00E+00 | 9.54E-03    | 2.13E-09 | 0.0865169   | 4.67E-06 |
| phe.Fasting_rs72895346 S8 | AAK1 | rs143377827 S13 | "DIAPH1,LOC | 4.02E-06 | 1.00E+00 | 2.05E-03    | 1.25E-09 | 0.0508948   | 2.90E-06 |
| phe.Fasting_rs72895346 S8 | AAK1 | rs143691978 S11 | DIAPH1      | 2.34E-05 | 1        | 0.0095427   | 2.14E-09 | 0.0869355   | 4.68E-06 |
| phe.Fasting_rs72895346 S8 | AAK1 | rs144081334 S11 | DIAPH1      | 2.34E-05 | 1.00E+00 | 9.54E-03    | 2.14E-09 | 0.0869355   | 4.68E-06 |
| phe.Fasting_rs72895346 S8 | AAK1 | rs145027704 S11 | DIAPH1      | 2.34E-05 | 1.00E+00 | 9.54E-03    | 2.14E-09 | 0.0869355   | 4.68E-06 |
| phe.Fasting_rs72895346 S8 | AAK1 | rs146622060 S13 | DIAPH1      | 2.34E-05 | 1.00E+00 | 9.54E-03    | 2.14E-09 | 0.0869355   | 4.68E-06 |
| phe.Fasting_rs72895346 S8 | AAK1 | rs147417996 S7  | DIAPH1      | 2.34E-05 | 1.00E+00 | 9.54E-03    | 2.14E-09 | 0.0869355   | 4.68E-06 |

|                        |    |       |             |     |              |          |            |             |          |             |             |
|------------------------|----|-------|-------------|-----|--------------|----------|------------|-------------|----------|-------------|-------------|
| phe.Fasting_rs72895346 | S8 | AAK1  | rs147677041 | S8  | DIAPH1       | 2.34E-05 | 1.00E+00   | 9.54E-03    | 2.13E-09 | 0.0865169   | 4.67E-06    |
| phe.Fasting_rs72895346 | S8 | AAK1  | rs149019627 | S8  | DIAPH1       | 2.34E-05 | 1.00E+00   | 9.54E-03    | 2.13E-09 | 0.0865169   | 4.67E-06    |
| phe.Fasting_rs72895346 | S8 | AAK1  | rs149791570 | S5  | DIAPH1       | 2.34E-05 | 1.00E+00   | 9.54E-03    | 2.13E-09 | 0.0865169   | 4.67E-06    |
| phe.Fasting_rs72895346 | S8 | AAK1  | rs151330468 | S8  | DIAPH1       | 2.34E-05 | 1          | 9.54E-03    | 2.14E-09 | 0.0869355   | 4.68E-06    |
| phe.Fasting_rs72895346 | S8 | AAK1  | rs185502834 | S8  | DIAPH1       | 2.34E-05 | 1          | 9.54E-03    | 2.13E-09 | 0.0865169   | 4.67E-06    |
| phe.Fasting_rs72895346 | S8 | AAK1  | rs190559574 | S7  | DIAPH1       | 2.34E-05 | 1          | 9.54E-03    | 2.13E-09 | 0.0865169   | 4.67E-06    |
| phe.Fasting_rs72895346 | S8 | AAK1  | rs55900860  | S7  | DIAPH1       | 2.34E-05 | 1          | 9.54E-03    | 2.13E-09 | 0.0865169   | 4.67E-06    |
| phe.Fasting_rs72895346 | S8 | AAK1  | rs7004597   | S8  | NA           | 3.34E-08 | 1          | 2.85E-05    | 2.47E-10 | 0.0100489   | 6.81E-07    |
| phe.Fasting_rs72895346 | S8 | AAK1  | rs78353402  | S8  | AP3M2        | 3.34E-08 | 1          | 2.85E-05    | 8.04E-10 | 0.0327298   | 1.96E-06    |
| phe.Fasting_rs72895346 | S8 | AAK1  | rs79517926  | S15 | "DIAPH1,LOC  | 1.68E-05 | 1.00E+00   | 7.14E-03    | 8.69E-12 | 0.000353841 | 3.26E-08    |
| phe.Fasting_rs73058677 | S5 | MYO1B | rs111576333 | S5  | TMEM64       | 2.74E-07 | 1          | 1.91E-04    | 1.15E-05 | 1           | 0.00912663  |
| phe.Fasting_rs73058677 | S5 | MYO1B | rs112027720 | S7  | DIAPH1       | 3.87E-07 | 1          | 2.62E-04    | 6.79E-09 | 0.276288    | 1.31E-05    |
| phe.Fasting_rs73058677 | S5 | MYO1B | rs113219478 | S7  | DIAPH1       | 3.87E-07 | 1          | 2.62E-04    | 6.79E-09 | 0.276288    | 1.31E-05    |
| phe.Fasting_rs73058677 | S5 | MYO1B | rs113357907 | S24 | ISL1         | 9.16E-17 | 3.74E-09   | 3.95E-13    | 7.23E-15 | 2.94E-07    | 6.43E-11    |
| phe.Fasting_rs73058677 | S5 | MYO1B | rs115787552 | S5  | KPNA3        | 3.32E-15 | 1.36E-07   | 9.02E-12    | 2.49E-06 | 1           | 0.00249063  |
| phe.Fasting_rs73058677 | S5 | MYO1B | rs115888477 | S8  | NA           | 2.14E-14 | 8.74E-07   | 5.29E-11    | 5.95E-07 | 1           | 0.000702217 |
| phe.Fasting_rs73058677 | S5 | MYO1B | rs116011837 | S9  | BRD2         | 4.92E-11 | 0.00200936 | 6.66E-08    | 2.51E-09 | 0.101972    | 5.40E-06    |
| phe.Fasting_rs73058677 | S5 | MYO1B | rs116079984 | S8  | KPNA3        | 3.32E-15 | 1.36E-07   | 9.02E-12    | 3.13E-06 | 1           | 3.04E-03    |
| phe.Fasting_rs73058677 | S5 | MYO1B | rs116120727 | S9  | BRD2         | 4.92E-11 | 2.01E-03   | 6.66E-08    | 2.51E-09 | 0.101972    | 5.40E-06    |
| phe.Fasting_rs73058677 | S5 | MYO1B | rs116279995 | S20 | "PCDHGA4,PI  | 4.63E-06 | 1.00E+00   | 2.33E-03    | 3.18E-09 | 0.129279    | 6.68E-06    |
| phe.Fasting_rs73058677 | S5 | MYO1B | rs116406581 | S2  | NA           | 2.71E-11 | 1.11E-03   | 3.89E-08    | 9.38E-06 | 1           | 0.00774202  |
| phe.Fasting_rs73058677 | S5 | MYO1B | rs11989304  | S4  | TMEM64       | 2.74E-07 | 1.00E+00   | 1.91E-04    | 1.13E-05 | 1           | 0.00900462  |
| phe.Fasting_rs73058677 | S5 | MYO1B | rs12488988  | S6  | PHC3         | 7.51E-07 | 1.00E+00   | 4.70E-04    | 1.18E-09 | 0.0479937   | 2.76E-06    |
| phe.Fasting_rs73058677 | S5 | MYO1B | rs12492606  | S8  | PHC3         | 7.51E-07 | 1          | 4.70E-04    | 1.16E-09 | 0.0470191   | 2.71E-06    |
| phe.Fasting_rs73058677 | S5 | MYO1B | rs13400525  | S8  | MFF          | 1.15E-15 | 4.69E-08   | 3.37E-12    | 7.83E-11 | 0.00318582  | 2.44E-07    |
| phe.Fasting_rs73058677 | S5 | MYO1B | rs138090701 | S5  | HDAC3        | 7.07E-08 | 1.00E+00   | 5.59E-05    | 6.83E-09 | 0.277916    | 1.32E-05    |
| phe.Fasting_rs73058677 | S5 | MYO1B | rs138136869 | S7  | DIAPH1       | 1.25E-07 | 1.00E+00   | 9.30E-05    | 1.79E-09 | 0.0726617   | 3.98E-06    |
| phe.Fasting_rs73058677 | S5 | MYO1B | rs138457103 | S10 | DIAPH1       | 2.67E-07 | 1.00E+00   | 1.86E-04    | 6.98E-09 | 0.284199    | 1.35E-05    |
| phe.Fasting_rs73058677 | S5 | MYO1B | rs138487229 | S11 | DIAPH1       | 3.87E-07 | 1          | 0.000261569 | 6.79E-09 | 0.276288    | 1.31E-05    |
| phe.Fasting_rs73058677 | S5 | MYO1B | rs138738950 | S8  | "PCDHGB2,PI  | 3.87E-07 | 1.00E+00   | 2.62E-04    | 6.80E-09 | 0.276765    | 1.31E-05    |
| phe.Fasting_rs73058677 | S5 | MYO1B | rs139297927 | S8  | DIAPH1       | 3.87E-07 | 1.00E+00   | 2.62E-04    | 6.79E-09 | 0.276288    | 1.31E-05    |
| phe.Fasting_rs73058677 | S5 | MYO1B | rs139337303 | S8  | DIAPH1       | 3.87E-07 | 1.00E+00   | 2.62E-04    | 6.79E-09 | 0.276288    | 1.31E-05    |
| phe.Fasting_rs73058677 | S5 | MYO1B | rs139403963 | S8  | DIAPH1       | 1.25E-07 | 1.00E+00   | 9.30E-05    | 1.79E-09 | 0.0726617   | 3.98E-06    |
| phe.Fasting_rs73058677 | S5 | MYO1B | rs139621309 | S18 | "LOC10050506 | 3.87E-07 | 1.00E+00   | 2.62E-04    | 6.79E-09 | 0.276288    | 1.31E-05    |
| phe.Fasting_rs73058677 | S5 | MYO1B | rs139828110 | S8  | DIAPH1       | 1.25E-07 | 1.00E+00   | 9.30E-05    | 1.79E-09 | 0.0726617   | 3.98E-06    |
| phe.Fasting_rs73058677 | S5 | MYO1B | rs140070363 | S8  | DIAPH1       | 3.87E-07 | 1.00E+00   | 2.62E-04    | 6.79E-09 | 0.276288    | 1.31E-05    |
| phe.Fasting_rs73058677 | S5 | MYO1B | rs140524622 | S7  | MRPL10       | 1.27E-16 | 5.21E-09   | 5.18E-13    | 1.69E-08 | 0.687784    | 2.95E-05    |
| phe.Fasting_rs73058677 | S5 | MYO1B | rs140644750 | S13 | DIAPH1       | 3.87E-07 | 1          | 2.62E-04    | 6.79E-09 | 0.276288    | 1.31E-05    |
| phe.Fasting_rs73058677 | S5 | MYO1B | rs141022544 | S8  | DIAPH1       | 3.87E-07 | 1          | 2.62E-04    | 6.79E-09 | 0.276288    | 1.31E-05    |
| phe.Fasting_rs73058677 | S5 | MYO1B | rs141525984 | S5  | DIAPH1       | 3.87E-07 | 1          | 2.62E-04    | 6.79E-09 | 0.276288    | 1.31E-05    |

|                        |    |       |             |     |             |          |          |             |          |             |             |
|------------------------|----|-------|-------------|-----|-------------|----------|----------|-------------|----------|-------------|-------------|
| phe.Fasting_rs73058677 | S5 | MYO1B | rs141692339 | S3  | "PCDHGA6,Pi | 5.05E-06 | 1        | 2.51E-03    | 4.47E-09 | 0.181764    | 9.03E-06    |
| phe.Fasting_rs73058677 | S5 | MYO1B | rs141926074 | S8  | ATE1        | 1.60E-17 | 6.51E-10 | 1.22E-13    | 6.10E-12 | 0.000248306 | 2.36E-08    |
| phe.Fasting_rs73058677 | S5 | MYO1B | rs142480565 | S8  | DIAPH1      | 3.87E-07 | 1.00E+00 | 2.62E-04    | 6.79E-09 | 0.276288    | 1.31E-05    |
| phe.Fasting_rs73058677 | S5 | MYO1B | rs142718558 | S7  | "DIAPH1,LOC | 3.87E-07 | 1        | 2.62E-04    | 6.79E-09 | 0.276288    | 1.31E-05    |
| phe.Fasting_rs73058677 | S5 | MYO1B | rs142789100 | S8  | DIAPH1      | 1.25E-07 | 1        | 9.30E-05    | 1.79E-09 | 0.0726617   | 3.98E-06    |
| phe.Fasting_rs73058677 | S5 | MYO1B | rs142812798 | S7  | DIAPH1      | 1.25E-07 | 1        | 9.30E-05    | 1.79E-09 | 0.0726617   | 3.98E-06    |
| phe.Fasting_rs73058677 | S5 | MYO1B | rs143377827 | S13 | "DIAPH1,LOC | 1.07E-07 | 1        | 8.10E-05    | 1.37E-09 | 0.055732    | 3.13E-06    |
| phe.Fasting_rs73058677 | S5 | MYO1B | rs143691978 | S11 | DIAPH1      | 1.25E-07 | 1.00E+00 | 9.30E-05    | 1.83E-09 | 0.0746175   | 4.07E-06    |
| phe.Fasting_rs73058677 | S5 | MYO1B | rs144081334 | S11 | DIAPH1      | 1.25E-07 | 1.00E+00 | 9.30E-05    | 1.83E-09 | 0.0746175   | 4.07E-06    |
| phe.Fasting_rs73058677 | S5 | MYO1B | rs144613910 | S8  | DIAPH1      | 3.87E-07 | 1        | 0.000261569 | 6.79E-09 | 0.276288    | 1.31E-05    |
| phe.Fasting_rs73058677 | S5 | MYO1B | rs145027704 | S11 | DIAPH1      | 1.25E-07 | 1.00E+00 | 9.30E-05    | 1.83E-09 | 0.0746175   | 4.07E-06    |
| phe.Fasting_rs73058677 | S5 | MYO1B | rs146220673 | S7  | DIAPH1      | 3.87E-07 | 1.00E+00 | 2.62E-04    | 6.79E-09 | 0.276288    | 1.31E-05    |
| phe.Fasting_rs73058677 | S5 | MYO1B | rs146622060 | S13 | DIAPH1      | 1.25E-07 | 1.00E+00 | 9.30E-05    | 1.83E-09 | 0.0746175   | 4.07E-06    |
| phe.Fasting_rs73058677 | S5 | MYO1B | rs146815317 | S5  | KPNA3       | 3.32E-15 | 1.36E-07 | 9.02E-12    | 2.49E-06 | 1           | 0.00249063  |
| phe.Fasting_rs73058677 | S5 | MYO1B | rs146878162 | S7  | DIAPH1      | 3.87E-07 | 1.00E+00 | 2.62E-04    | 6.79E-09 | 0.276288    | 1.31E-05    |
| phe.Fasting_rs73058677 | S5 | MYO1B | rs147314451 | S8  | DIAPH1      | 3.87E-07 | 1.00E+00 | 2.62E-04    | 6.79E-09 | 0.276288    | 1.31E-05    |
| phe.Fasting_rs73058677 | S5 | MYO1B | rs147417996 | S7  | DIAPH1      | 1.25E-07 | 1        | 9.30E-05    | 1.83E-09 | 0.0746175   | 4.07E-06    |
| phe.Fasting_rs73058677 | S5 | MYO1B | rs147506725 | S21 | "PCDHGA1,Pi | 4.63E-06 | 1.00E+00 | 2.33E-03    | 3.18E-09 | 0.129279    | 6.68E-06    |
| phe.Fasting_rs73058677 | S5 | MYO1B | rs147646948 | S7  | "LOC100505  | 3.87E-07 | 1.00E+00 | 2.62E-04    | 6.79E-09 | 0.276288    | 1.31E-05    |
| phe.Fasting_rs73058677 | S5 | MYO1B | rs147677041 | S8  | DIAPH1      | 1.25E-07 | 1.00E+00 | 9.30E-05    | 1.79E-09 | 0.0726617   | 3.98E-06    |
| phe.Fasting_rs73058677 | S5 | MYO1B | rs148116628 | S7  | DIAPH1      | 3.87E-07 | 1.00E+00 | 2.62E-04    | 6.79E-09 | 0.276288    | 1.31E-05    |
| phe.Fasting_rs73058677 | S5 | MYO1B | rs148423011 | S7  | DIAPH1      | 3.87E-07 | 1.00E+00 | 2.62E-04    | 6.79E-09 | 0.276288    | 1.31E-05    |
| phe.Fasting_rs73058677 | S5 | MYO1B | rs149019627 | S8  | DIAPH1      | 1.25E-07 | 1.00E+00 | 9.30E-05    | 1.79E-09 | 0.0726617   | 3.98E-06    |
| phe.Fasting_rs73058677 | S5 | MYO1B | rs149075406 | S8  | DIAPH1      | 3.87E-07 | 1        | 0.000261569 | 6.79E-09 | 0.276288    | 1.31E-05    |
| phe.Fasting_rs73058677 | S5 | MYO1B | rs149334783 | S8  | DIAPH1      | 3.87E-07 | 1.00E+00 | 2.62E-04    | 6.79E-09 | 0.276288    | 1.31E-05    |
| phe.Fasting_rs73058677 | S5 | MYO1B | rs149553852 | S21 | "PCDHGA10,l | 4.63E-06 | 1.00E+00 | 2.33E-03    | 3.18E-09 | 0.129279    | 6.68E-06    |
| phe.Fasting_rs73058677 | S5 | MYO1B | rs149716949 | S5  | DIAPH1      | 5.22E-08 | 1        | 4.26E-05    | 8.23E-10 | 0.033489    | 2.00E-06    |
| phe.Fasting_rs73058677 | S5 | MYO1B | rs149791570 | S5  | DIAPH1      | 1.25E-07 | 1.00E+00 | 9.30E-05    | 1.79E-09 | 0.0726617   | 3.98E-06    |
| phe.Fasting_rs73058677 | S5 | MYO1B | rs150117838 | S8  | KPNA3       | 3.32E-15 | 1.36E-07 | 9.02E-12    | 2.48E-06 | 1           | 0.00248279  |
| phe.Fasting_rs73058677 | S5 | MYO1B | rs150452206 | S13 | "DIAPH1,LOC | 3.87E-07 | 1        | 2.62E-04    | 6.79E-09 | 0.276288    | 1.31E-05    |
| phe.Fasting_rs73058677 | S5 | MYO1B | rs150675915 | S7  | DIAPH1      | 3.87E-07 | 1        | 0.000261569 | 6.79E-09 | 0.276288    | 1.31E-05    |
| phe.Fasting_rs73058677 | S5 | MYO1B | rs150765570 | S7  | DIAPH1      | 3.87E-07 | 1.00E+00 | 2.62E-04    | 6.79E-09 | 0.276288    | 1.31E-05    |
| phe.Fasting_rs73058677 | S5 | MYO1B | rs150992994 | S11 | "PCDHGA5,Pi | 4.05E-07 | 1.00E+00 | 2.72E-04    | 6.57E-09 | 0.267624    | 1.27E-05    |
| phe.Fasting_rs73058677 | S5 | MYO1B | rs151204700 | S8  | DIAPH1      | 3.87E-07 | 1.00E+00 | 2.62E-04    | 6.79E-09 | 0.276288    | 1.31E-05    |
| phe.Fasting_rs73058677 | S5 | MYO1B | rs151330468 | S8  | DIAPH1      | 1.25E-07 | 1.00E+00 | 9.30E-05    | 1.83E-09 | 0.0746175   | 4.07E-06    |
| phe.Fasting_rs73058677 | S5 | MYO1B | rs16854875  | S2  | NA          | 5.88E-07 | 1.00E+00 | 3.80E-04    | 3.72E-07 | 1           | 0.000460301 |
| phe.Fasting_rs73058677 | S5 | MYO1B | rs17236830  | S6  | PHC3        | 1.28E-06 | 1.00E+00 | 7.57E-04    | 1.47E-09 | 0.0598239   | 3.35E-06    |
| phe.Fasting_rs73058677 | S5 | MYO1B | rs180772028 | S8  | "DIAPH1,LOC | 3.87E-07 | 1        | 0.000261569 | 6.79E-09 | 0.276288    | 1.31E-05    |
| phe.Fasting_rs73058677 | S5 | MYO1B | rs181224861 | S7  | DIAPH1      | 3.87E-07 | 1.00E+00 | 2.62E-04    | 6.79E-09 | 0.276288    | 1.31E-05    |
| phe.Fasting_rs73058677 | S5 | MYO1B | rs181247960 | S21 | "PCDHGA9,Pi | 4.63E-06 | 1.00E+00 | 2.33E-03    | 3.18E-09 | 0.129279    | 6.68E-06    |

|                        |    |       |             |     |             |          |             |             |          |             |             |
|------------------------|----|-------|-------------|-----|-------------|----------|-------------|-------------|----------|-------------|-------------|
| phe.Fasting_rs73058677 | S5 | MYO1B | rs181824655 | S21 | "PCDHGB6,PI | 4.63E-06 | 1           | 0.00232586  | 3.18E-09 | 0.129279    | 6.68E-06    |
| phe.Fasting_rs73058677 | S5 | MYO1B | rs182714699 | S8  | DIAPH1      | 3.87E-07 | 1.00E+00    | 2.62E-04    | 6.79E-09 | 0.276288    | 1.31E-05    |
| phe.Fasting_rs73058677 | S5 | MYO1B | rs182958142 | S8  | DIAPH1      | 6.31E-07 | 1.00E+00    | 4.04E-04    | 6.77E-10 | 0.0275426   | 1.69E-06    |
| phe.Fasting_rs73058677 | S5 | MYO1B | rs182965141 | S8  | DIAPH1      | 1.36E-07 | 1           | 1.00E-04    | 8.85E-08 | 1           | 0.000126817 |
| phe.Fasting_rs73058677 | S5 | MYO1B | rs183597049 | S7  | DIAPH1      | 3.87E-07 | 1           | 0.000261569 | 6.79E-09 | 0.276288    | 1.31E-05    |
| phe.Fasting_rs73058677 | S5 | MYO1B | rs183980988 | S2  | NA          | 3.87E-07 | 1.00E+00    | 2.62E-04    | 6.79E-09 | 0.276288    | 1.31E-05    |
| phe.Fasting_rs73058677 | S5 | MYO1B | rs184233232 | S7  | DIAPH1      | 3.87E-07 | 1           | 0.000261569 | 6.79E-09 | 0.276288    | 1.31E-05    |
| phe.Fasting_rs73058677 | S5 | MYO1B | rs184509477 | S13 | "PCDHGB4,PI | 3.87E-07 | 1           | 0.000261569 | 6.79E-09 | 0.276288    | 1.31E-05    |
| phe.Fasting_rs73058677 | S5 | MYO1B | rs185069296 | S15 | "LOC1005056 | 3.87E-07 | 1           | 2.62E-04    | 6.79E-09 | 0.276288    | 1.31E-05    |
| phe.Fasting_rs73058677 | S5 | MYO1B | rs185502834 | S8  | DIAPH1      | 1.25E-07 | 1           | 9.30E-05    | 1.79E-09 | 0.0726617   | 3.98E-06    |
| phe.Fasting_rs73058677 | S5 | MYO1B | rs185759881 | S7  | DIAPH1      | 3.87E-07 | 1           | 0.000261569 | 6.79E-09 | 0.276288    | 1.31E-05    |
| phe.Fasting_rs73058677 | S5 | MYO1B | rs186288044 | S21 | "PCDHGB4,PI | 4.63E-06 | 1           | 0.00232586  | 3.18E-09 | 0.129279    | 6.68E-06    |
| phe.Fasting_rs73058677 | S5 | MYO1B | rs187000011 | S11 | DIAPH1      | 3.87E-07 | 1           | 0.000261569 | 6.79E-09 | 0.276288    | 1.31E-05    |
| phe.Fasting_rs73058677 | S5 | MYO1B | rs188981295 | S5  | "RPS27AP10, | 3.87E-07 | 1           | 0.000261569 | 6.79E-09 | 0.276288    | 1.31E-05    |
| phe.Fasting_rs73058677 | S5 | MYO1B | rs190559574 | S7  | DIAPH1      | 1.25E-07 | 1           | 9.30E-05    | 1.79E-09 | 0.0726617   | 3.98E-06    |
| phe.Fasting_rs73058677 | S5 | MYO1B | rs191544043 | S8  | DIAPH1      | 3.87E-07 | 1           | 0.000261569 | 6.79E-09 | 0.276288    | 1.31E-05    |
| phe.Fasting_rs73058677 | S5 | MYO1B | rs191766712 | S7  | DIAPH1      | 3.87E-07 | 1           | 0.000261569 | 6.79E-09 | 0.276288    | 1.31E-05    |
| phe.Fasting_rs73058677 | S5 | MYO1B | rs192690040 | S7  | DIAPH1      | 3.87E-07 | 1           | 0.000261569 | 6.79E-09 | 0.276288    | 1.31E-05    |
| phe.Fasting_rs73058677 | S5 | MYO1B | rs192765219 | S7  | DIAPH1      | 3.87E-07 | 1           | 2.62E-04    | 6.79E-09 | 0.276288    | 1.31E-05    |
| phe.Fasting_rs73058677 | S5 | MYO1B | rs192770525 | S7  | DIAPH1      | 3.87E-07 | 1.00E+00    | 2.62E-04    | 6.79E-09 | 0.276288    | 1.31E-05    |
| phe.Fasting_rs73058677 | S5 | MYO1B | rs2241292   | S8  | GPR160      | 7.71E-07 | 1.00E+00    | 4.81E-04    | 1.72E-09 | 0.0699058   | 3.85E-06    |
| phe.Fasting_rs73058677 | S5 | MYO1B | rs35990401  | S7  | DIAPH1      | 4.16E-07 | 1.00E+00    | 2.78E-04    | 2.44E-09 | 0.0992874   | 5.28E-06    |
| phe.Fasting_rs73058677 | S5 | MYO1B | rs3772186   | S6  | PHC3        | 7.51E-07 | 1.00E+00    | 4.70E-04    | 1.16E-09 | 0.0470191   | 2.71E-06    |
| phe.Fasting_rs73058677 | S5 | MYO1B | rs55900860  | S7  | DIAPH1      | 1.25E-07 | 1.00E+00    | 9.30E-05    | 1.79E-09 | 0.0726617   | 3.98E-06    |
| phe.Fasting_rs73058677 | S5 | MYO1B | rs57287019  | S5  | CLCN3       | 3.46E-11 | 1.41E-03    | 4.84E-08    | 5.81E-06 | 1           | 0.00518237  |
| phe.Fasting_rs73058677 | S5 | MYO1B | rs57503635  | S3  | NA          | 5.73E-07 | 1           | 0.000371124 | 1.28E-06 | 1           | 0.00140853  |
| phe.Fasting_rs73058677 | S5 | MYO1B | rs58417766  | S7  | PHC3        | 7.51E-07 | 1.00E+00    | 4.70E-04    | 1.16E-09 | 0.0470191   | 2.71E-06    |
| phe.Fasting_rs73058677 | S5 | MYO1B | rs6763396   | S5  | PHC3        | 8.07E-07 | 1.00E+00    | 5.02E-04    | 1.18E-09 | 0.0481566   | 2.77E-06    |
| phe.Fasting_rs73058677 | S5 | MYO1B | rs6781454   | S8  | PHC3        | 7.65E-07 | 1           | 0.000478609 | 1.17E-09 | 0.0478091   | 2.75E-06    |
| phe.Fasting_rs73058677 | S5 | MYO1B | rs6786022   | S8  | PHC3        | 1.23E-06 | 1.00E+00    | 7.29E-04    | 1.43E-09 | 0.0581815   | 3.26E-06    |
| phe.Fasting_rs73058677 | S5 | MYO1B | rs6808506   | S7  | PHC3        | 7.51E-07 | 1.00E+00    | 4.70E-04    | 1.16E-09 | 0.0470191   | 2.71E-06    |
| phe.Fasting_rs73058677 | S5 | MYO1B | rs6881310   | S23 | ISL1        | 5.93E-16 | 2.42E-08    | 1.84E-12    | 2.67E-12 | 0.000108628 | 1.14E-08    |
| phe.Fasting_rs73058677 | S5 | MYO1B | rs7004597   | S8  | NA          | 7.34E-12 | 0.000299915 | 1.26E-08    | 9.27E-06 | 1           | 0.00766363  |
| phe.Fasting_rs73058677 | S5 | MYO1B | rs7256517   | S7  | CYTH2       | 1.84E-05 | 1.00E+00    | 7.75E-03    | 2.03E-06 | 1           | 0.00209942  |
| phe.Fasting_rs73058677 | S5 | MYO1B | rs73619637  | S8  | NA          | 8.20E-07 | 1.00E+00    | 5.08E-04    | 9.59E-16 | 3.90E-08    | 1.16E-11    |
| phe.Fasting_rs73058677 | S5 | MYO1B | rs73879173  | S8  | PHC3        | 7.51E-07 | 1.00E+00    | 4.70E-04    | 1.16E-09 | 0.0470191   | 2.71E-06    |
| phe.Fasting_rs73058677 | S5 | MYO1B | rs73879178  | S10 | PHC3        | 1.23E-06 | 1.00E+00    | 7.29E-04    | 1.43E-09 | 0.0581815   | 3.26E-06    |
| phe.Fasting_rs73058677 | S5 | MYO1B | rs73879182  | S6  | PHC3        | 7.51E-07 | 1.00E+00    | 4.70E-04    | 1.16E-09 | 0.0470191   | 2.71E-06    |
| phe.Fasting_rs73058677 | S5 | MYO1B | rs75758702  | S24 | NA          | 7.83E-17 | 3.20E-09    | 3.47E-13    | 5.38E-12 | 0.000218866 | 2.11E-08    |
| phe.Fasting_rs73058677 | S5 | MYO1B | rs76146702  | S5  | PHC3        | 8.11E-07 | 1           | 0.0005043   | 2.52E-08 | 1           | 4.14E-05    |

|                        |    |        |             |     |             |          |            |            |          |           |             |
|------------------------|----|--------|-------------|-----|-------------|----------|------------|------------|----------|-----------|-------------|
| phe.Fasting_rs73058677 | S5 | MYO1B  | rs7615039   | S8  | PHC3        | 6.80E-07 | 1.00E+00   | 4.32E-04   | 1.77E-09 | 0.0721242 | 3.96E-06    |
| phe.Fasting_rs73058677 | S5 | MYO1B  | rs7638400   | S7  | PHC3        | 7.51E-07 | 1.00E+00   | 4.70E-04   | 1.16E-09 | 0.0470191 | 2.71E-06    |
| phe.Fasting_rs73058677 | S5 | MYO1B  | rs7657672   | S8  | CLCN3       | 3.98E-11 | 0.00162518 | 5.48E-08   | 1.28E-05 | 1         | 9.90E-03    |
| phe.Fasting_rs73058677 | S5 | MYO1B  | rs76737663  | S1  | LOC654841   | 1.29E-15 | 5.25E-08   | 3.74E-12   | 8.36E-10 | 0.0340198 | 2.03E-06    |
| phe.Fasting_rs73058677 | S5 | MYO1B  | rs77444916  | S23 | LOC642366   | 2.06E-16 | 8.39E-09   | 7.10E-13   | 6.87E-15 | 2.80E-07  | 6.14E-11    |
| phe.Fasting_rs73058677 | S5 | MYO1B  | rs77798597  | S7  | KPNA3       | 3.32E-15 | 1.36E-07   | 9.02E-12   | 2.48E-06 | 1         | 0.00248279  |
| phe.Fasting_rs73058677 | S5 | MYO1B  | rs78516788  | S8  | SLC38A1     | 6.09E-06 | 1          | 0.00296271 | 8.12E-16 | 3.31E-08  | 1.16E-11    |
| phe.Fasting_rs73058677 | S5 | MYO1B  | rs78736524  | S5  | KPNA3       | 3.32E-15 | 1.36E-07   | 9.02E-12   | 2.49E-06 | 1         | 0.00249063  |
| phe.Fasting_rs73058677 | S5 | MYO1B  | rs78990344  | S2  | LOC10050631 | 2.74E-07 | 1.00E+00   | 1.91E-04   | 1.13E-05 | 1         | 0.00900462  |
| phe.Fasting_rs73058677 | S5 | MYO1B  | rs79389383  | S8  | PHC3        | 7.65E-07 | 1.00E+00   | 4.79E-04   | 1.17E-09 | 0.0478091 | 2.75E-06    |
| phe.Fasting_rs73058677 | S5 | MYO1B  | rs79517926  | S15 | "DIAPH1,LOC | 1.64E-07 | 1.00E+00   | 1.18E-04   | 8.61E-10 | 0.0350523 | 2.08E-06    |
| phe.Fasting_rs73058677 | S5 | MYO1B  | rs79518241  | S6  | PHC3        | 7.51E-07 | 1.00E+00   | 4.70E-04   | 1.16E-09 | 0.0470191 | 2.71E-06    |
| phe.Fasting_rs73058677 | S5 | MYO1B  | rs79781495  | S8  | KPNA3       | 3.32E-15 | 1.36E-07   | 9.02E-12   | 2.48E-06 | 1         | 0.00248279  |
| phe.Fasting_rs73058677 | S5 | MYO1B  | rs80258830  | S24 | LOC642366   | 2.06E-16 | 8.39E-09   | 7.10E-13   | 6.87E-15 | 2.80E-07  | 6.14E-11    |
| phe.Fasting_rs73058677 | S5 | MYO1B  | rs80332465  | S5  | KPNA3       | 3.53E-15 | 1.44E-07   | 9.50E-12   | 2.57E-06 | 1         | 0.00255969  |
| phe.Fasting_rs73058677 | S5 | MYO1B  | rs80334773  | S5  | KPNA3       | 3.53E-15 | 1.44E-07   | 9.50E-12   | 2.57E-06 | 1         | 2.56E-03    |
| phe.Fasting_rs73158088 | S8 | COPG2  | rs116079984 | S8  | KPNA3       | 5.27E-06 | 1          | 0.00260564 | 1.06E-09 | 0.0429595 | 2.50E-06    |
| phe.Fasting_rs73158088 | S8 | COPG2  | rs74627895  | S8  | TMEM64      | 1.77E-10 | 7.23E-03   | 2.21E-07   | 9.17E-06 | 1         | 7.60E-03    |
| phe.Fasting_rs73158095 | S7 | COPG2  | rs116079984 | S8  | KPNA3       | 5.40E-06 | 1.00E+00   | 2.66E-03   | 3.77E-08 | 1         | 5.94E-05    |
| phe.Fasting_rs73158095 | S7 | COPG2  | rs74627895  | S8  | TMEM64      | 1.57E-10 | 0.00641302 | 1.97E-07   | 8.10E-06 | 1         | 0.00685529  |
| phe.Fasting_rs73283603 | S7 | ZWINT  | rs57503635  | S3  | NA          | 4.78E-16 | 1.95E-08   | 1.52E-12   | 1.50E-06 | 1         | 0.00161629  |
| phe.Fasting_rs73392640 | S8 | POLR3B | rs115305957 | S23 | NA          | 2.53E-16 | 1.03E-08   | 8.58E-13   | 3.40E-24 | 1.39E-16  | 4.62E-17    |
| phe.Fasting_rs73392640 | S8 | POLR3B | rs115787552 | S5  | KPNA3       | 3.76E-15 | 1.53E-07   | 1.00E-11   | 4.88E-06 | 1         | 0.00448129  |
| phe.Fasting_rs73392640 | S8 | POLR3B | rs116079984 | S8  | KPNA3       | 3.76E-15 | 1.53E-07   | 1.00E-11   | 7.81E-06 | 1         | 0.00663496  |
| phe.Fasting_rs73392640 | S8 | POLR3B | rs146815317 | S5  | KPNA3       | 3.76E-15 | 1.53E-07   | 1.00E-11   | 4.88E-06 | 1         | 4.48E-03    |
| phe.Fasting_rs73392640 | S8 | POLR3B | rs150117838 | S8  | KPNA3       | 3.76E-15 | 1.53E-07   | 1.00E-11   | 5.99E-06 | 1         | 0.0053177   |
| phe.Fasting_rs73392640 | S8 | POLR3B | rs74701059  | S24 | C17orf102   | 2.57E-16 | 1.05E-08   | 8.69E-13   | 6.55E-24 | 2.67E-16  | 6.66E-17    |
| phe.Fasting_rs73392640 | S8 | POLR3B | rs74914207  | S24 | NA          | 2.53E-13 | 1.03E-05   | 5.47E-10   | 8.12E-10 | 0.0330561 | 1.98E-06    |
| phe.Fasting_rs73392640 | S8 | POLR3B | rs77798597  | S7  | KPNA3       | 3.76E-15 | 1.53E-07   | 1.00E-11   | 5.99E-06 | 1         | 0.0053177   |
| phe.Fasting_rs73392640 | S8 | POLR3B | rs78736524  | S5  | KPNA3       | 3.76E-15 | 1.53E-07   | 1.00E-11   | 4.88E-06 | 1         | 0.00448129  |
| phe.Fasting_rs73392640 | S8 | POLR3B | rs79703349  | S24 | C17orf102   | 2.57E-16 | 1.05E-08   | 8.69E-13   | 9.28E-24 | 3.78E-16  | 7.56E-17    |
| phe.Fasting_rs73392640 | S8 | POLR3B | rs79781495  | S8  | KPNA3       | 3.76E-15 | 1.53E-07   | 1.00E-11   | 5.99E-06 | 1         | 0.0053177   |
| phe.Fasting_rs73392640 | S8 | POLR3B | rs80332465  | S5  | KPNA3       | 3.99E-15 | 1.63E-07   | 1.06E-11   | 6.18E-06 | 1         | 0.00545807  |
| phe.Fasting_rs73392640 | S8 | POLR3B | rs80334773  | S5  | KPNA3       | 3.99E-15 | 1.63E-07   | 1.06E-11   | 6.18E-06 | 1         | 0.00545807  |
| phe.Fasting_rs7355385  | S8 | MTX2   | rs112027720 | S7  | DIAPH1      | 1.51E-07 | 1          | 1.10E-04   | 6.19E-07 | 1         | 0.000728414 |
| phe.Fasting_rs7355385  | S8 | MTX2   | rs113219478 | S7  | DIAPH1      | 1.51E-07 | 1          | 1.10E-04   | 6.19E-07 | 1         | 0.000728414 |
| phe.Fasting_rs7355385  | S8 | MTX2   | rs116011837 | S9  | BRD2        | 1.66E-05 | 1          | 7.07E-03   | 7.00E-06 | 1         | 0.00606539  |
| phe.Fasting_rs7355385  | S8 | MTX2   | rs116120727 | S9  | BRD2        | 1.66E-05 | 1          | 7.07E-03   | 7.00E-06 | 1         | 0.00606539  |
| phe.Fasting_rs7355385  | S8 | MTX2   | rs138090701 | S5  | HDAC3       | 3.36E-08 | 1          | 2.86E-05   | 1.25E-05 | 1         | 0.00970645  |
| phe.Fasting_rs7355385  | S8 | MTX2   | rs138457103 | S10 | DIAPH1      | 3.63E-07 | 1.00E+00   | 2.47E-04   | 4.09E-06 | 1         | 0.00383765  |

|                       |    |      |                |             |          |          |             |          |   |             |
|-----------------------|----|------|----------------|-------------|----------|----------|-------------|----------|---|-------------|
| phe.Fasting_rs7355385 | S8 | MTX2 | rs138487229S11 | DIAPH1      | 1.51E-07 | 1        | 1.10E-04    | 6.19E-07 | 1 | 0.000728414 |
| phe.Fasting_rs7355385 | S8 | MTX2 | rs138738950S8  | "PCDHGB2,Pi | 1.51E-07 | 1        | 1.10E-04    | 6.05E-07 | 1 | 0.000713858 |
| phe.Fasting_rs7355385 | S8 | MTX2 | rs139297927S8  | DIAPH1      | 1.51E-07 | 1        | 1.10E-04    | 6.19E-07 | 1 | 0.000728414 |
| phe.Fasting_rs7355385 | S8 | MTX2 | rs139337303S8  | DIAPH1      | 1.51E-07 | 1        | 1.10E-04    | 6.19E-07 | 1 | 0.000728414 |
| phe.Fasting_rs7355385 | S8 | MTX2 | rs139621309S18 | "LOC1005056 | 1.51E-07 | 1.00E+00 | 1.10E-04    | 6.19E-07 | 1 | 0.000728414 |
| phe.Fasting_rs7355385 | S8 | MTX2 | rs140070363S8  | DIAPH1      | 1.51E-07 | 1.00E+00 | 1.10E-04    | 6.19E-07 | 1 | 0.000728414 |
| phe.Fasting_rs7355385 | S8 | MTX2 | rs140644750S13 | DIAPH1      | 1.51E-07 | 1        | 0.000110063 | 6.19E-07 | 1 | 0.000728414 |
| phe.Fasting_rs7355385 | S8 | MTX2 | rs141022544S8  | DIAPH1      | 1.51E-07 | 1.00E+00 | 1.10E-04    | 6.19E-07 | 1 | 7.28E-04    |
| phe.Fasting_rs7355385 | S8 | MTX2 | rs141525984S5  | DIAPH1      | 1.51E-07 | 1.00E+00 | 1.10E-04    | 6.19E-07 | 1 | 0.000728414 |
| phe.Fasting_rs7355385 | S8 | MTX2 | rs142480565S8  | DIAPH1      | 1.51E-07 | 1.00E+00 | 1.10E-04    | 6.19E-07 | 1 | 0.000728414 |
| phe.Fasting_rs7355385 | S8 | MTX2 | rs142718558S7  | "DIAPH1,LOC | 1.51E-07 | 1.00E+00 | 1.10E-04    | 6.19E-07 | 1 | 0.000728414 |
| phe.Fasting_rs7355385 | S8 | MTX2 | rs144613910S8  | DIAPH1      | 1.51E-07 | 1.00E+00 | 1.10E-04    | 6.19E-07 | 1 | 0.000728414 |
| phe.Fasting_rs7355385 | S8 | MTX2 | rs146220673S7  | DIAPH1      | 1.51E-07 | 1.00E+00 | 1.10E-04    | 6.19E-07 | 1 | 0.000728414 |
| phe.Fasting_rs7355385 | S8 | MTX2 | rs146878162S7  | DIAPH1      | 1.51E-07 | 1        | 1.10E-04    | 6.19E-07 | 1 | 0.000728414 |
| phe.Fasting_rs7355385 | S8 | MTX2 | rs147314451S8  | DIAPH1      | 1.51E-07 | 1.00E+00 | 1.10E-04    | 6.19E-07 | 1 | 0.000728414 |
| phe.Fasting_rs7355385 | S8 | MTX2 | rs147646948S7  | "LOC1005056 | 1.51E-07 | 1.00E+00 | 1.10E-04    | 6.19E-07 | 1 | 0.000728414 |
| phe.Fasting_rs7355385 | S8 | MTX2 | rs148116628S7  | DIAPH1      | 1.51E-07 | 1.00E+00 | 1.10E-04    | 6.19E-07 | 1 | 7.28E-04    |
| phe.Fasting_rs7355385 | S8 | MTX2 | rs148423011S7  | DIAPH1      | 1.51E-07 | 1.00E+00 | 1.10E-04    | 6.19E-07 | 1 | 0.000728414 |
| phe.Fasting_rs7355385 | S8 | MTX2 | rs149075406S8  | DIAPH1      | 1.51E-07 | 1.00E+00 | 1.10E-04    | 6.19E-07 | 1 | 0.000728414 |
| phe.Fasting_rs7355385 | S8 | MTX2 | rs149334783S8  | DIAPH1      | 1.51E-07 | 1.00E+00 | 1.10E-04    | 6.19E-07 | 1 | 0.000728414 |
| phe.Fasting_rs7355385 | S8 | MTX2 | rs149716949S5  | DIAPH1      | 6.24E-08 | 1        | 5.01E-05    | 1.28E-07 | 1 | 0.000176999 |
| phe.Fasting_rs7355385 | S8 | MTX2 | rs150452206S13 | "DIAPH1,LOC | 1.51E-07 | 1.00E+00 | 1.10E-04    | 6.19E-07 | 1 | 0.000728414 |
| phe.Fasting_rs7355385 | S8 | MTX2 | rs150675915S7  | DIAPH1      | 1.51E-07 | 1.00E+00 | 1.10E-04    | 6.19E-07 | 1 | 7.28E-04    |
| phe.Fasting_rs7355385 | S8 | MTX2 | rs150765570S7  | DIAPH1      | 1.51E-07 | 1        | 0.000110063 | 6.19E-07 | 1 | 7.28E-04    |
| phe.Fasting_rs7355385 | S8 | MTX2 | rs150992994S11 | "PCDHGA5,Pi | 1.54E-07 | 1.00E+00 | 1.12E-04    | 5.37E-08 | 1 | 8.17E-05    |
| phe.Fasting_rs7355385 | S8 | MTX2 | rs151204700S8  | DIAPH1      | 1.51E-07 | 1.00E+00 | 1.10E-04    | 6.19E-07 | 1 | 0.000728414 |
| phe.Fasting_rs7355385 | S8 | MTX2 | rs180772028S8  | "DIAPH1,LOC | 1.51E-07 | 1        | 1.10E-04    | 6.19E-07 | 1 | 0.000728414 |
| phe.Fasting_rs7355385 | S8 | MTX2 | rs181224861S7  | DIAPH1      | 1.51E-07 | 1        | 0.000110063 | 6.19E-07 | 1 | 0.000728414 |
| phe.Fasting_rs7355385 | S8 | MTX2 | rs182714699S8  | DIAPH1      | 1.51E-07 | 1        | 1.10E-04    | 6.19E-07 | 1 | 0.000728414 |
| phe.Fasting_rs7355385 | S8 | MTX2 | rs183597049S7  | DIAPH1      | 1.51E-07 | 1        | 1.10E-04    | 6.19E-07 | 1 | 7.28E-04    |
| phe.Fasting_rs7355385 | S8 | MTX2 | rs183980988S2  | NA          | 1.51E-07 | 1        | 0.000110063 | 6.19E-07 | 1 | 7.28E-04    |
| phe.Fasting_rs7355385 | S8 | MTX2 | rs184233232S7  | DIAPH1      | 1.51E-07 | 1.00E+00 | 1.10E-04    | 6.19E-07 | 1 | 0.000728414 |
| phe.Fasting_rs7355385 | S8 | MTX2 | rs184509477S13 | "PCDHGB4,Pi | 1.51E-07 | 1.00E+00 | 1.10E-04    | 6.19E-07 | 1 | 0.000728414 |
| phe.Fasting_rs7355385 | S8 | MTX2 | rs185069296S15 | "LOC1005056 | 1.51E-07 | 1.00E+00 | 1.10E-04    | 6.19E-07 | 1 | 7.28E-04    |
| phe.Fasting_rs7355385 | S8 | MTX2 | rs185759881S7  | DIAPH1      | 1.51E-07 | 1        | 0.000110063 | 6.19E-07 | 1 | 0.000728414 |
| phe.Fasting_rs7355385 | S8 | MTX2 | rs187000011S11 | DIAPH1      | 1.51E-07 | 1.00E+00 | 1.10E-04    | 6.19E-07 | 1 | 0.000728414 |
| phe.Fasting_rs7355385 | S8 | MTX2 | rs188981295S5  | "RPS27AP10, | 1.51E-07 | 1.00E+00 | 1.10E-04    | 6.19E-07 | 1 | 0.000728414 |
| phe.Fasting_rs7355385 | S8 | MTX2 | rs191544043S8  | DIAPH1      | 1.51E-07 | 1.00E+00 | 1.10E-04    | 6.19E-07 | 1 | 0.000728414 |
| phe.Fasting_rs7355385 | S8 | MTX2 | rs191766712S7  | DIAPH1      | 1.51E-07 | 1.00E+00 | 1.10E-04    | 6.19E-07 | 1 | 0.000728414 |
| phe.Fasting_rs7355385 | S8 | MTX2 | rs192690040S7  | DIAPH1      | 1.51E-07 | 1.00E+00 | 1.10E-04    | 6.19E-07 | 1 | 0.000728414 |



|                        |     |            |                |             |          |             |             |          |            |             |
|------------------------|-----|------------|----------------|-------------|----------|-------------|-------------|----------|------------|-------------|
| phe.Fasting_rs7355385  | S8  | MTX2       | rs192765219S7  | DIAPH1      | 1.51E-07 | 1.00E+00    | 1.10E-04    | 6.19E-07 | 1          | 0.000728414 |
| phe.Fasting_rs7355385  | S8  | MTX2       | rs192770525S7  | DIAPH1      | 1.51E-07 | 1.00E+00    | 1.10E-04    | 6.19E-07 | 1          | 0.000728414 |
| phe.Fasting_rs7355385  | S8  | MTX2       | rs35990401 S7  | DIAPH1      | 1.19E-07 | 1           | 8.89E-05    | 8.28E-06 | 1          | 0.00699236  |
| phe.Fasting_rs7355385  | S8  | MTX2       | rs79517926 S15 | "DIAPH1,LOC | 1.47E-06 | 1           | 8.55E-04    | 7.50E-10 | 0.0305128  | 1.85E-06    |
| phe.Fasting_rs73713153 | S3  | DNAJB9     | rs116406581S2  | NA          | 1.08E-05 | 1           | 4.88E-03    | 5.74E-08 | 1          | 8.69E-05    |
| phe.Fasting_rs73794928 | S13 | "PCDHGA9,P | rs112089881S8  | ZFAND4      | 6.32E-18 | 2.58E-10    | 7.65E-14    | 5.67E-09 | 0.230936   | 1.11E-05    |
| phe.Fasting_rs73794928 | S13 | "PCDHGA9,P | rs114565620S8  | RCL1        | 9.21E-18 | 3.76E-10    | 9.24E-14    | 7.78E-09 | 0.316691   | 1.49E-05    |
| phe.Fasting_rs73794928 | S13 | "PCDHGA9,P | rs115787552S5  | KPNA3       | 3.11E-06 | 1           | 0.00163518  | 5.27E-09 | 0.214554   | 1.04E-05    |
| phe.Fasting_rs73794928 | S13 | "PCDHGA9,P | rs115888477S8  | NA          | 1.78E-05 | 1.00E+00    | 7.52E-03    | 9.21E-10 | 0.0374773  | 2.19E-06    |
| phe.Fasting_rs73794928 | S13 | "PCDHGA9,P | rs116079984S8  | KPNA3       | 3.11E-06 | 1           | 1.64E-03    | 6.18E-09 | 0.251623   | 1.20E-05    |
| phe.Fasting_rs73794928 | S13 | "PCDHGA9,P | rs116548615S8  | TMEM45B     | 3.85E-17 | 1.57E-09    | 2.08E-13    | 1.42E-09 | 0.0577371  | 3.24E-06    |
| phe.Fasting_rs73794928 | S13 | "PCDHGA9,P | rs146815317S5  | KPNA3       | 3.11E-06 | 1           | 1.64E-03    | 5.27E-09 | 0.214554   | 1.04E-05    |
| phe.Fasting_rs73794928 | S13 | "PCDHGA9,P | rs150117838S8  | KPNA3       | 3.11E-06 | 1           | 1.64E-03    | 5.08E-09 | 0.206949   | 1.01E-05    |
| phe.Fasting_rs73794928 | S13 | "PCDHGA9,P | rs150916187S4  | HIST1H2BK   | 6.25E-06 | 1.00E+00    | 3.04E-03    | 1.34E-09 | 0.0544353  | 3.06E-06    |
| phe.Fasting_rs73794928 | S13 | "PCDHGA9,P | rs16894241 S4  | HIST1H2BK   | 7.67E-12 | 3.13E-04    | 1.30E-08    | 3.24E-09 | 0.132049   | 6.82E-06    |
| phe.Fasting_rs73794928 | S13 | "PCDHGA9,P | rs57503635 S3  | NA          | 1.62E-07 | 1           | 0.000117452 | 8.98E-11 | 0.003656   | 2.77E-07    |
| phe.Fasting_rs73794928 | S13 | "PCDHGA9,P | rs7256517 S7   | CYTH2       | 1.27E-06 | 1.00E+00    | 7.50E-04    | 6.78E-07 | 1          | 7.92E-04    |
| phe.Fasting_rs73794928 | S13 | "PCDHGA9,P | rs73392640 S8  | POLR3B      | 1.30E-10 | 5.31E-03    | 1.65E-07    | 1.53E-08 | 0.624642   | 2.72E-05    |
| phe.Fasting_rs73794928 | S13 | "PCDHGA9,P | rs74914207 S24 | NA          | 3.93E-11 | 1.61E-03    | 5.41E-08    | 8.54E-06 | 1          | 0.00716395  |
| phe.Fasting_rs73794928 | S13 | "PCDHGA9,P | rs75350765 S5  | RCL1        | 9.21E-18 | 3.76E-10    | 9.24E-14    | 7.78E-09 | 0.316691   | 1.49E-05    |
| phe.Fasting_rs73794928 | S13 | "PCDHGA9,P | rs75758702 S24 | NA          | 1.38E-07 | 1.00E+00    | 1.02E-04    | 5.30E-09 | 0.215917   | 1.05E-05    |
| phe.Fasting_rs73794928 | S13 | "PCDHGA9,P | rs7763107 S8   | FARS2       | 6.37E-08 | 1.00E+00    | 5.10E-05    | 9.53E-07 | 1          | 0.00108166  |
| phe.Fasting_rs73794928 | S13 | "PCDHGA9,P | rs77798597 S7  | KPNA3       | 3.11E-06 | 1           | 1.64E-03    | 5.08E-09 | 0.206949   | 1.01E-05    |
| phe.Fasting_rs73794928 | S13 | "PCDHGA9,P | rs78516788 S8  | SLC38A1     | 1.11E-11 | 4.55E-04    | 1.76E-08    | 4.79E-08 | 1          | 7.38E-05    |
| phe.Fasting_rs73794928 | S13 | "PCDHGA9,P | rs78697063 S5  | MSI2        | 1.35E-19 | 5.51E-12    | 2.29E-14    | 8.58E-11 | 0.00349174 | 2.65E-07    |
| phe.Fasting_rs73794928 | S13 | "PCDHGA9,P | rs78736524 S5  | KPNA3       | 3.11E-06 | 1.00E+00    | 1.64E-03    | 5.27E-09 | 0.214554   | 1.04E-05    |
| phe.Fasting_rs73794928 | S13 | "PCDHGA9,P | rs79781495 S8  | KPNA3       | 3.11E-06 | 1.00E+00    | 1.64E-03    | 5.08E-09 | 0.206949   | 1.01E-05    |
| phe.Fasting_rs73794928 | S13 | "PCDHGA9,P | rs80332465 S5  | KPNA3       | 3.14E-06 | 1.00E+00    | 1.65E-03    | 5.41E-09 | 0.220384   | 1.07E-05    |
| phe.Fasting_rs73794928 | S13 | "PCDHGA9,P | rs80334773 S5  | KPNA3       | 3.14E-06 | 1.00E+00    | 1.65E-03    | 5.41E-09 | 0.220384   | 1.07E-05    |
| phe.Fasting_rs73864708 | S8  | NEK1       | rs112027720S7  | DIAPH1      | 9.17E-12 | 0.000374383 | 1.48E-08    | 2.23E-08 | 0.908274   | 3.74E-05    |
| phe.Fasting_rs73864708 | S8  | NEK1       | rs112089881S8  | ZFAND4      | 1.84E-18 | 7.51E-11    | 3.89E-14    | 5.67E-09 | 0.230592   | 1.11E-05    |
| phe.Fasting_rs73864708 | S8  | NEK1       | rs113219478S7  | DIAPH1      | 9.17E-12 | 3.74E-04    | 1.48E-08    | 2.23E-08 | 0.908274   | 3.74E-05    |
| phe.Fasting_rs73864708 | S8  | NEK1       | rs113357907S24 | ISL1        | 6.12E-18 | 2.50E-10    | 7.50E-14    | 9.34E-16 | 3.80E-08   | 1.16E-11    |
| phe.Fasting_rs73864708 | S8  | NEK1       | rs115787552S5  | KPNA3       | 3.50E-16 | 1.43E-08    | 1.15E-12    | 2.15E-07 | 1          | 2.81E-04    |
| phe.Fasting_rs73864708 | S8  | NEK1       | rs115888477S8  | NA          | 2.70E-15 | 1.10E-07    | 7.57E-12    | 1.63E-08 | 0.66442    | 2.86E-05    |
| phe.Fasting_rs73864708 | S8  | NEK1       | rs116011837S9  | BRD2        | 2.29E-17 | 9.34E-10    | 1.45E-13    | 2.21E-10 | 0.00900315 | 6.20E-07    |
| phe.Fasting_rs73864708 | S8  | NEK1       | rs116079984S8  | KPNA3       | 3.50E-16 | 1.43E-08    | 1.15E-12    | 2.52E-07 | 1          | 0.000325188 |
| phe.Fasting_rs73864708 | S8  | NEK1       | rs116120727S9  | BRD2        | 2.29E-17 | 9.34E-10    | 1.45E-13    | 2.21E-10 | 0.00900315 | 6.20E-07    |
| phe.Fasting_rs73864708 | S8  | NEK1       | rs116279995S20 | "PCDHGA4,P  | 2.15E-05 | 1           | 0.00887266  | 2.34E-07 | 1          | 3.04E-04    |
| phe.Fasting_rs73864708 | S8  | NEK1       | rs138090701S5  | HDAC3       | 1.02E-12 | 4.17E-05    | 2.10E-09    | 1.29E-08 | 0.523399   | 2.33E-05    |

|                        |    |      |                |             |          |             |          |          |          |             |
|------------------------|----|------|----------------|-------------|----------|-------------|----------|----------|----------|-------------|
| phe.Fasting_rs73864708 | S8 | NEK1 | rs138136869S7  | DIAPH1      | 1.65E-12 | 6.74E-05    | 3.16E-09 | 3.12E-09 | 0.127195 | 6.59E-06    |
| phe.Fasting_rs73864708 | S8 | NEK1 | rs138457103S10 | DIAPH1      | 5.43E-12 | 2.22E-04    | 9.60E-09 | 2.09E-08 | 0.850097 | 3.57E-05    |
| phe.Fasting_rs73864708 | S8 | NEK1 | rs138487229S11 | DIAPH1      | 9.17E-12 | 0.000374383 | 1.48E-08 | 2.23E-08 | 0.908274 | 3.74E-05    |
| phe.Fasting_rs73864708 | S8 | NEK1 | rs138738950S8  | "PCDHGB2,Pi | 9.17E-12 | 3.74E-04    | 1.48E-08 | 2.22E-08 | 0.904374 | 3.74E-05    |
| phe.Fasting_rs73864708 | S8 | NEK1 | rs139297927S8  | DIAPH1      | 9.17E-12 | 3.74E-04    | 1.48E-08 | 2.23E-08 | 0.908274 | 3.74E-05    |
| phe.Fasting_rs73864708 | S8 | NEK1 | rs139337303S8  | DIAPH1      | 9.17E-12 | 3.74E-04    | 1.48E-08 | 2.23E-08 | 0.908274 | 3.74E-05    |
| phe.Fasting_rs73864708 | S8 | NEK1 | rs139403963S8  | DIAPH1      | 1.65E-12 | 6.74E-05    | 3.16E-09 | 3.12E-09 | 0.127195 | 6.59E-06    |
| phe.Fasting_rs73864708 | S8 | NEK1 | rs139621309S18 | "LOC1005056 | 9.17E-12 | 3.74E-04    | 1.48E-08 | 2.23E-08 | 0.908274 | 3.74E-05    |
| phe.Fasting_rs73864708 | S8 | NEK1 | rs139828110S8  | DIAPH1      | 1.65E-12 | 6.74E-05    | 3.16E-09 | 3.12E-09 | 0.127195 | 6.59E-06    |
| phe.Fasting_rs73864708 | S8 | NEK1 | rs140070363S8  | DIAPH1      | 9.17E-12 | 3.74E-04    | 1.48E-08 | 2.23E-08 | 0.908274 | 3.74E-05    |
| phe.Fasting_rs73864708 | S8 | NEK1 | rs140644750S13 | DIAPH1      | 9.17E-12 | 0.000374383 | 1.48E-08 | 2.23E-08 | 0.908274 | 3.74E-05    |
| phe.Fasting_rs73864708 | S8 | NEK1 | rs141022544S8  | DIAPH1      | 9.17E-12 | 0.000374383 | 1.48E-08 | 2.23E-08 | 0.908274 | 3.74E-05    |
| phe.Fasting_rs73864708 | S8 | NEK1 | rs141525984S5  | DIAPH1      | 9.17E-12 | 0.000374383 | 1.48E-08 | 2.23E-08 | 0.908274 | 3.74E-05    |
| phe.Fasting_rs73864708 | S8 | NEK1 | rs141926074S8  | ATE1        | 1.33E-06 | 1           | 7.83E-04 | 1.98E-14 | 8.07E-07 | 1.59E-10    |
| phe.Fasting_rs73864708 | S8 | NEK1 | rs142480565S8  | DIAPH1      | 9.17E-12 | 0.000374383 | 1.48E-08 | 2.23E-08 | 0.908274 | 3.74E-05    |
| phe.Fasting_rs73864708 | S8 | NEK1 | rs142718558S7  | "DIAPH1,LOC | 9.17E-12 | 0.000374383 | 1.48E-08 | 2.23E-08 | 0.908274 | 3.74E-05    |
| phe.Fasting_rs73864708 | S8 | NEK1 | rs142789100S8  | DIAPH1      | 1.65E-12 | 6.74E-05    | 3.16E-09 | 3.12E-09 | 0.127195 | 6.59E-06    |
| phe.Fasting_rs73864708 | S8 | NEK1 | rs142812798S7  | DIAPH1      | 1.65E-12 | 6.74E-05    | 3.16E-09 | 3.12E-09 | 0.127195 | 6.59E-06    |
| phe.Fasting_rs73864708 | S8 | NEK1 | rs143377827S13 | "DIAPH1,LOC | 1.45E-12 | 5.90E-05    | 2.83E-09 | 2.57E-09 | 0.104505 | 5.52E-06    |
| phe.Fasting_rs73864708 | S8 | NEK1 | rs143691978S11 | DIAPH1      | 1.65E-12 | 6.74E-05    | 3.16E-09 | 5.06E-09 | 0.206028 | 1.01E-05    |
| phe.Fasting_rs73864708 | S8 | NEK1 | rs144081334S11 | DIAPH1      | 1.65E-12 | 6.74E-05    | 3.16E-09 | 5.06E-09 | 0.206028 | 1.01E-05    |
| phe.Fasting_rs73864708 | S8 | NEK1 | rs144613910S8  | DIAPH1      | 9.17E-12 | 3.74E-04    | 1.48E-08 | 2.23E-08 | 0.908274 | 3.74E-05    |
| phe.Fasting_rs73864708 | S8 | NEK1 | rs145027704S11 | DIAPH1      | 1.65E-12 | 6.74E-05    | 3.16E-09 | 5.06E-09 | 0.206028 | 1.01E-05    |
| phe.Fasting_rs73864708 | S8 | NEK1 | rs146220673S7  | DIAPH1      | 9.17E-12 | 0.000374383 | 1.48E-08 | 2.23E-08 | 0.908274 | 3.74E-05    |
| phe.Fasting_rs73864708 | S8 | NEK1 | rs146622060S13 | DIAPH1      | 1.65E-12 | 6.74E-05    | 3.16E-09 | 5.06E-09 | 0.206028 | 1.01E-05    |
| phe.Fasting_rs73864708 | S8 | NEK1 | rs146815317S5  | KPNA3       | 3.50E-16 | 1.43E-08    | 1.15E-12 | 2.15E-07 | 1        | 0.000281471 |
| phe.Fasting_rs73864708 | S8 | NEK1 | rs146878162S7  | DIAPH1      | 9.17E-12 | 3.74E-04    | 1.48E-08 | 2.23E-08 | 0.908274 | 3.74E-05    |
| phe.Fasting_rs73864708 | S8 | NEK1 | rs1470889S5    | ZC3H3       | 3.60E-08 | 1.00E+00    | 3.04E-05 | 6.78E-07 | 1        | 0.000791674 |
| phe.Fasting_rs73864708 | S8 | NEK1 | rs1470890S5    | ZC3H3       | 3.60E-08 | 1.00E+00    | 3.04E-05 | 6.78E-07 | 1        | 0.000791674 |
| phe.Fasting_rs73864708 | S8 | NEK1 | rs147314451S8  | DIAPH1      | 9.17E-12 | 3.74E-04    | 1.48E-08 | 2.23E-08 | 0.908274 | 3.74E-05    |
| phe.Fasting_rs73864708 | S8 | NEK1 | rs147417996S7  | DIAPH1      | 1.65E-12 | 6.74E-05    | 3.16E-09 | 5.06E-09 | 0.206028 | 1.01E-05    |
| phe.Fasting_rs73864708 | S8 | NEK1 | rs147506725S21 | "PCDHGA1,Pi | 2.15E-05 | 1           | 8.87E-03 | 2.34E-07 | 1        | 0.000303649 |
| phe.Fasting_rs73864708 | S8 | NEK1 | rs147646948S7  | "LOC1005056 | 9.17E-12 | 0.000374383 | 1.48E-08 | 2.23E-08 | 0.908274 | 3.74E-05    |
| phe.Fasting_rs73864708 | S8 | NEK1 | rs147677041S8  | DIAPH1      | 1.65E-12 | 6.74E-05    | 3.16E-09 | 3.12E-09 | 0.127195 | 6.59E-06    |
| phe.Fasting_rs73864708 | S8 | NEK1 | rs148116628S7  | DIAPH1      | 9.17E-12 | 0.000374383 | 1.48E-08 | 2.23E-08 | 0.908274 | 3.74E-05    |
| phe.Fasting_rs73864708 | S8 | NEK1 | rs148423011S7  | DIAPH1      | 9.17E-12 | 0.000374383 | 1.48E-08 | 2.23E-08 | 0.908274 | 3.74E-05    |
| phe.Fasting_rs73864708 | S8 | NEK1 | rs149019627S8  | DIAPH1      | 1.65E-12 | 6.74E-05    | 3.16E-09 | 3.12E-09 | 0.127195 | 6.59E-06    |
| phe.Fasting_rs73864708 | S8 | NEK1 | rs149075406S8  | DIAPH1      | 9.17E-12 | 0.000374383 | 1.48E-08 | 2.23E-08 | 0.908274 | 3.74E-05    |
| phe.Fasting_rs73864708 | S8 | NEK1 | rs149334783S8  | DIAPH1      | 9.17E-12 | 0.000374383 | 1.48E-08 | 2.23E-08 | 0.908274 | 3.74E-05    |
| phe.Fasting_rs73864708 | S8 | NEK1 | rs149553852S21 | "PCDHGA10,  | 2.15E-05 | 1.00E+00    | 8.87E-03 | 2.34E-07 | 1        | 0.000303649 |

|                        |    |      |                |             |          |             |          |          |           |             |
|------------------------|----|------|----------------|-------------|----------|-------------|----------|----------|-----------|-------------|
| phe.Fasting_rs73864708 | S8 | NEK1 | rs149716949S5  | DIAPH1      | 7.67E-13 | 3.13E-05    | 1.59E-09 | 2.72E-09 | 0.110842  | 5.82E-06    |
| phe.Fasting_rs73864708 | S8 | NEK1 | rs149791570S5  | DIAPH1      | 1.65E-12 | 6.74E-05    | 3.16E-09 | 3.12E-09 | 0.127195  | 6.59E-06    |
| phe.Fasting_rs73864708 | S8 | NEK1 | rs150117838S8  | KPNA3       | 3.50E-16 | 1.43E-08    | 1.15E-12 | 2.05E-07 | 1         | 0.000270369 |
| phe.Fasting_rs73864708 | S8 | NEK1 | rs150452206S13 | "DIAPH1,LOC | 9.17E-12 | 0.000374383 | 1.48E-08 | 2.23E-08 | 0.908274  | 3.74E-05    |
| phe.Fasting_rs73864708 | S8 | NEK1 | rs150675915S7  | DIAPH1      | 9.17E-12 | 3.74E-04    | 1.48E-08 | 2.23E-08 | 0.908274  | 3.74E-05    |
| phe.Fasting_rs73864708 | S8 | NEK1 | rs150765570S7  | DIAPH1      | 9.17E-12 | 3.74E-04    | 1.48E-08 | 2.23E-08 | 0.908274  | 3.74E-05    |
| phe.Fasting_rs73864708 | S8 | NEK1 | rs150992994S11 | "PCDHGA5,PI | 9.47E-12 | 3.87E-04    | 1.52E-08 | 2.14E-08 | 0.869105  | 3.65E-05    |
| phe.Fasting_rs73864708 | S8 | NEK1 | rs151204700S8  | DIAPH1      | 9.17E-12 | 0.000374383 | 1.48E-08 | 2.23E-08 | 0.908274  | 3.74E-05    |
| phe.Fasting_rs73864708 | S8 | NEK1 | rs151330468S8  | DIAPH1      | 1.65E-12 | 6.74E-05    | 3.16E-09 | 5.06E-09 | 0.206028  | 1.01E-05    |
| phe.Fasting_rs73864708 | S8 | NEK1 | rs16894241 S4  | HIST1H2BK   | 5.24E-08 | 1.00E+00    | 4.28E-05 | 5.37E-07 | 1         | 0.000638437 |
| phe.Fasting_rs73864708 | S8 | NEK1 | rs180772028S8  | "DIAPH1,LOC | 9.17E-12 | 3.74E-04    | 1.48E-08 | 2.23E-08 | 0.908274  | 3.74E-05    |
| phe.Fasting_rs73864708 | S8 | NEK1 | rs181224861S7  | DIAPH1      | 9.17E-12 | 3.74E-04    | 1.48E-08 | 2.23E-08 | 0.908274  | 3.74E-05    |
| phe.Fasting_rs73864708 | S8 | NEK1 | rs181247960S21 | "PCDHGA9,PI | 2.15E-05 | 1.00E+00    | 8.87E-03 | 2.34E-07 | 1         | 0.000303649 |
| phe.Fasting_rs73864708 | S8 | NEK1 | rs181824655S21 | "PCDHGB6,PI | 2.15E-05 | 1.00E+00    | 8.87E-03 | 2.34E-07 | 1         | 0.000303649 |
| phe.Fasting_rs73864708 | S8 | NEK1 | rs182714699S8  | DIAPH1      | 9.17E-12 | 3.74E-04    | 1.48E-08 | 2.23E-08 | 0.908274  | 3.74E-05    |
| phe.Fasting_rs73864708 | S8 | NEK1 | rs182965141S8  | DIAPH1      | 2.01E-12 | 8.19E-05    | 3.80E-09 | 1.71E-09 | 0.0696833 | 3.83E-06    |
| phe.Fasting_rs73864708 | S8 | NEK1 | rs183597049S7  | DIAPH1      | 9.17E-12 | 0.000374383 | 1.48E-08 | 2.23E-08 | 0.908274  | 3.74E-05    |
| phe.Fasting_rs73864708 | S8 | NEK1 | rs183980988S2  | NA          | 9.17E-12 | 0.000374383 | 1.48E-08 | 2.23E-08 | 0.908274  | 3.74E-05    |
| phe.Fasting_rs73864708 | S8 | NEK1 | rs184233232S7  | DIAPH1      | 9.17E-12 | 0.000374383 | 1.48E-08 | 2.23E-08 | 0.908274  | 3.74E-05    |
| phe.Fasting_rs73864708 | S8 | NEK1 | rs184509477S13 | "PCDHGB4,PI | 9.17E-12 | 0.000374383 | 1.48E-08 | 2.23E-08 | 0.908274  | 3.74E-05    |
| phe.Fasting_rs73864708 | S8 | NEK1 | rs185069296S15 | "LOC1005056 | 9.17E-12 | 0.000374383 | 1.48E-08 | 2.23E-08 | 0.908274  | 3.74E-05    |
| phe.Fasting_rs73864708 | S8 | NEK1 | rs185502834S8  | DIAPH1      | 1.65E-12 | 6.74E-05    | 3.16E-09 | 3.12E-09 | 0.127195  | 6.59E-06    |
| phe.Fasting_rs73864708 | S8 | NEK1 | rs185759881S7  | DIAPH1      | 9.17E-12 | 0.000374383 | 1.48E-08 | 2.23E-08 | 0.908274  | 3.74E-05    |
| phe.Fasting_rs73864708 | S8 | NEK1 | rs186288044S21 | "PCDHGB4,PI | 2.15E-05 | 1           | 8.87E-03 | 2.34E-07 | 1         | 0.000303649 |
| phe.Fasting_rs73864708 | S8 | NEK1 | rs187000011S11 | DIAPH1      | 9.17E-12 | 0.000374383 | 1.48E-08 | 2.23E-08 | 0.908274  | 3.74E-05    |
| phe.Fasting_rs73864708 | S8 | NEK1 | rs188981295S5  | "RPS27AP10, | 9.17E-12 | 0.000374383 | 1.48E-08 | 2.23E-08 | 0.908274  | 3.74E-05    |
| phe.Fasting_rs73864708 | S8 | NEK1 | rs190559574S7  | DIAPH1      | 1.65E-12 | 6.74E-05    | 3.16E-09 | 3.12E-09 | 0.127195  | 6.59E-06    |
| phe.Fasting_rs73864708 | S8 | NEK1 | rs191544043S8  | DIAPH1      | 9.17E-12 | 3.74E-04    | 1.48E-08 | 2.23E-08 | 0.908274  | 3.74E-05    |
| phe.Fasting_rs73864708 | S8 | NEK1 | rs191766712S7  | DIAPH1      | 9.17E-12 | 0.000374383 | 1.48E-08 | 2.23E-08 | 0.908274  | 3.74E-05    |
| phe.Fasting_rs73864708 | S8 | NEK1 | rs192690040S7  | DIAPH1      | 9.17E-12 | 3.74E-04    | 1.48E-08 | 2.23E-08 | 0.908274  | 3.74E-05    |
| phe.Fasting_rs73864708 | S8 | NEK1 | rs192765219S7  | DIAPH1      | 9.17E-12 | 3.74E-04    | 1.48E-08 | 2.23E-08 | 0.908274  | 3.74E-05    |
| phe.Fasting_rs73864708 | S8 | NEK1 | rs192770525S7  | DIAPH1      | 9.17E-12 | 3.74E-04    | 1.48E-08 | 2.23E-08 | 0.908274  | 3.74E-05    |
| phe.Fasting_rs73864708 | S8 | NEK1 | rs2924507 S5   | ZC3H3       | 3.60E-08 | 1.00E+00    | 3.04E-05 | 6.78E-07 | 1         | 0.000791674 |
| phe.Fasting_rs73864708 | S8 | NEK1 | rs2924508 S8   | ZC3H3       | 3.60E-08 | 1.00E+00    | 3.04E-05 | 9.52E-07 | 1         | 0.00108069  |
| phe.Fasting_rs73864708 | S8 | NEK1 | rs2924511 S7   | ZC3H3       | 3.60E-08 | 1.00E+00    | 3.04E-05 | 5.76E-07 | 1         | 0.000680958 |
| phe.Fasting_rs73864708 | S8 | NEK1 | rs2924512 S7   | ZC3H3       | 4.02E-08 | 1           | 3.37E-05 | 7.17E-07 | 1         | 0.00083355  |
| phe.Fasting_rs73864708 | S8 | NEK1 | rs2956376 S8   | ZC3H3       | 3.60E-08 | 1.00E+00    | 3.04E-05 | 3.89E-07 | 1         | 0.000476148 |
| phe.Fasting_rs73864708 | S8 | NEK1 | rs2980270 S7   | ZC3H3       | 3.60E-08 | 1.00E+00    | 3.04E-05 | 3.89E-07 | 1         | 0.000476148 |
| phe.Fasting_rs73864708 | S8 | NEK1 | rs2980272 S7   | ZC3H3       | 4.02E-08 | 1.00E+00    | 3.37E-05 | 7.52E-07 | 1         | 8.70E-04    |
| phe.Fasting_rs73864708 | S8 | NEK1 | rs2980275 S5   | ZC3H3       | 3.60E-08 | 1.00E+00    | 3.04E-05 | 6.78E-07 | 1         | 0.000791674 |

|                        |    |      |             |     |             |          |             |          |          |            |             |
|------------------------|----|------|-------------|-----|-------------|----------|-------------|----------|----------|------------|-------------|
| phe.Fasting_rs73864708 | S8 | NEK1 | rs35990401  | S7  | DIAPH1      | 8.40E-12 | 3.43E-04    | 1.39E-08 | 8.38E-09 | 0.340996   | 1.59E-05    |
| phe.Fasting_rs73864708 | S8 | NEK1 | rs366767    | S5  | ZC3H3       | 6.34E-08 | 1.00E+00    | 5.08E-05 | 4.19E-07 | 1          | 0.000508745 |
| phe.Fasting_rs73864708 | S8 | NEK1 | rs55900860  | S7  | DIAPH1      | 1.65E-12 | 6.74E-05    | 3.16E-09 | 3.12E-09 | 0.127195   | 6.59E-06    |
| phe.Fasting_rs73864708 | S8 | NEK1 | rs6881310   | S23 | ISL1        | 4.23E-17 | 1.73E-09    | 2.22E-13 | 2.34E-12 | 9.53E-05   | 1.01E-08    |
| phe.Fasting_rs73864708 | S8 | NEK1 | rs73619637  | S8  | NA          | 1.02E-16 | 4.15E-09    | 4.31E-13 | 1.35E-08 | 0.549186   | 2.43E-05    |
| phe.Fasting_rs73864708 | S8 | NEK1 | rs77444916  | S23 | LOC642366   | 1.50E-17 | 6.11E-10    | 1.18E-13 | 8.75E-16 | 3.56E-08   | 1.16E-11    |
| phe.Fasting_rs73864708 | S8 | NEK1 | rs77798597  | S7  | KPNA3       | 3.50E-16 | 1.43E-08    | 1.15E-12 | 2.05E-07 | 1          | 2.70E-04    |
| phe.Fasting_rs73864708 | S8 | NEK1 | rs78703708  | S7  | FAF2        | 9.25E-18 | 3.78E-10    | 9.24E-14 | 2.08E-07 | 1          | 0.000273911 |
| phe.Fasting_rs73864708 | S8 | NEK1 | rs78736524  | S5  | KPNA3       | 3.50E-16 | 1.43E-08    | 1.15E-12 | 2.15E-07 | 1          | 0.000281471 |
| phe.Fasting_rs73864708 | S8 | NEK1 | rs79517926  | S15 | "DIAPH1,LOC | 2.69E-12 | 0.000109672 | 4.97E-09 | 2.29E-09 | 0.0931701  | 4.98E-06    |
| phe.Fasting_rs73864708 | S8 | NEK1 | rs79781495  | S8  | KPNA3       | 3.50E-16 | 1.43E-08    | 1.15E-12 | 2.05E-07 | 1          | 0.000270369 |
| phe.Fasting_rs73864708 | S8 | NEK1 | rs80258830  | S24 | LOC642366   | 1.50E-17 | 6.11E-10    | 1.18E-13 | 8.75E-16 | 3.56E-08   | 1.16E-11    |
| phe.Fasting_rs73864708 | S8 | NEK1 | rs80332465  | S5  | KPNA3       | 3.75E-16 | 1.53E-08    | 1.22E-12 | 2.14E-07 | 1          | 0.000280922 |
| phe.Fasting_rs73864708 | S8 | NEK1 | rs80334773  | S5  | KPNA3       | 3.75E-16 | 1.53E-08    | 1.22E-12 | 2.14E-07 | 1          | 0.000280922 |
| phe.Fasting_rs73864714 | S8 | NEK1 | rs112027720 | S7  | DIAPH1      | 9.17E-12 | 3.74E-04    | 1.48E-08 | 2.23E-08 | 0.908274   | 3.74E-05    |
| phe.Fasting_rs73864714 | S8 | NEK1 | rs112089881 | S8  | ZFAND4      | 1.84E-18 | 7.51E-11    | 3.89E-14 | 5.67E-09 | 0.230592   | 1.11E-05    |
| phe.Fasting_rs73864714 | S8 | NEK1 | rs113219478 | S7  | DIAPH1      | 9.17E-12 | 0.000374383 | 1.48E-08 | 2.23E-08 | 0.908274   | 3.74E-05    |
| phe.Fasting_rs73864714 | S8 | NEK1 | rs113357907 | S24 | ISL1        | 6.12E-18 | 2.50E-10    | 7.50E-14 | 9.34E-16 | 3.80E-08   | 1.16E-11    |
| phe.Fasting_rs73864714 | S8 | NEK1 | rs115787552 | S5  | KPNA3       | 3.50E-16 | 1.43E-08    | 1.15E-12 | 2.15E-07 | 1          | 0.000281471 |
| phe.Fasting_rs73864714 | S8 | NEK1 | rs115888477 | S8  | NA          | 2.70E-15 | 1.10E-07    | 7.57E-12 | 1.63E-08 | 0.66442    | 2.86E-05    |
| phe.Fasting_rs73864714 | S8 | NEK1 | rs116011837 | S9  | BRD2        | 2.29E-17 | 9.34E-10    | 1.45E-13 | 2.21E-10 | 0.00900315 | 6.20E-07    |
| phe.Fasting_rs73864714 | S8 | NEK1 | rs116079984 | S8  | KPNA3       | 3.50E-16 | 1.43E-08    | 1.15E-12 | 2.52E-07 | 1          | 0.000325188 |
| phe.Fasting_rs73864714 | S8 | NEK1 | rs116120727 | S9  | BRD2        | 2.29E-17 | 9.34E-10    | 1.45E-13 | 2.21E-10 | 0.00900315 | 6.20E-07    |
| phe.Fasting_rs73864714 | S8 | NEK1 | rs116279995 | S20 | "PCDHGA4,Pi | 2.15E-05 | 1.00E+00    | 8.87E-03 | 2.34E-07 | 1          | 0.000303649 |
| phe.Fasting_rs73864714 | S8 | NEK1 | rs138090701 | S5  | HDAC3       | 1.02E-12 | 4.17E-05    | 2.10E-09 | 1.29E-08 | 0.523399   | 2.33E-05    |
| phe.Fasting_rs73864714 | S8 | NEK1 | rs138136869 | S7  | DIAPH1      | 1.65E-12 | 6.74E-05    | 3.16E-09 | 3.12E-09 | 0.127195   | 6.59E-06    |
| phe.Fasting_rs73864714 | S8 | NEK1 | rs138457103 | S10 | DIAPH1      | 5.43E-12 | 0.000221795 | 9.60E-09 | 2.09E-08 | 0.850097   | 3.57E-05    |
| phe.Fasting_rs73864714 | S8 | NEK1 | rs138487229 | S11 | DIAPH1      | 9.17E-12 | 0.000374383 | 1.48E-08 | 2.23E-08 | 0.908274   | 3.74E-05    |
| phe.Fasting_rs73864714 | S8 | NEK1 | rs138738950 | S8  | "PCDHGB2,Pi | 9.17E-12 | 3.74E-04    | 1.48E-08 | 2.22E-08 | 0.904374   | 3.74E-05    |
| phe.Fasting_rs73864714 | S8 | NEK1 | rs139297927 | S8  | DIAPH1      | 9.17E-12 | 3.74E-04    | 1.48E-08 | 2.23E-08 | 0.908274   | 3.74E-05    |
| phe.Fasting_rs73864714 | S8 | NEK1 | rs139337303 | S8  | DIAPH1      | 9.17E-12 | 3.74E-04    | 1.48E-08 | 2.23E-08 | 0.908274   | 3.74E-05    |
| phe.Fasting_rs73864714 | S8 | NEK1 | rs139403963 | S8  | DIAPH1      | 1.65E-12 | 6.74E-05    | 3.16E-09 | 3.12E-09 | 0.127195   | 6.59E-06    |
| phe.Fasting_rs73864714 | S8 | NEK1 | rs139621309 | S18 | "LOC1005050 | 9.17E-12 | 3.74E-04    | 1.48E-08 | 2.23E-08 | 0.908274   | 3.74E-05    |
| phe.Fasting_rs73864714 | S8 | NEK1 | rs139828110 | S8  | DIAPH1      | 1.65E-12 | 6.74E-05    | 3.16E-09 | 3.12E-09 | 0.127195   | 6.59E-06    |
| phe.Fasting_rs73864714 | S8 | NEK1 | rs140070363 | S8  | DIAPH1      | 9.17E-12 | 3.74E-04    | 1.48E-08 | 2.23E-08 | 0.908274   | 3.74E-05    |
| phe.Fasting_rs73864714 | S8 | NEK1 | rs140644750 | S13 | DIAPH1      | 9.17E-12 | 3.74E-04    | 1.48E-08 | 2.23E-08 | 0.908274   | 3.74E-05    |
| phe.Fasting_rs73864714 | S8 | NEK1 | rs141022544 | S8  | DIAPH1      | 9.17E-12 | 3.74E-04    | 1.48E-08 | 2.23E-08 | 0.908274   | 3.74E-05    |
| phe.Fasting_rs73864714 | S8 | NEK1 | rs141525984 | S5  | DIAPH1      | 9.17E-12 | 3.74E-04    | 1.48E-08 | 2.23E-08 | 0.908274   | 3.74E-05    |
| phe.Fasting_rs73864714 | S8 | NEK1 | rs141926074 | S8  | ATE1        | 1.33E-06 | 1.00E+00    | 7.83E-04 | 1.98E-14 | 8.07E-07   | 1.59E-10    |
| phe.Fasting_rs73864714 | S8 | NEK1 | rs142480565 | S8  | DIAPH1      | 9.17E-12 | 0.000374383 | 1.48E-08 | 2.23E-08 | 0.908274   | 3.74E-05    |

|                        |    |      |                |              |          |             |            |          |          |             |
|------------------------|----|------|----------------|--------------|----------|-------------|------------|----------|----------|-------------|
| phe.Fasting_rs73864714 | S8 | NEK1 | rs142718558S7  | "DIAPH1,LOC  | 9.17E-12 | 0.000374383 | 1.48E-08   | 2.23E-08 | 0.908274 | 3.74E-05    |
| phe.Fasting_rs73864714 | S8 | NEK1 | rs142789100S8  | DIAPH1       | 1.65E-12 | 6.74E-05    | 3.16E-09   | 3.12E-09 | 0.127195 | 6.59E-06    |
| phe.Fasting_rs73864714 | S8 | NEK1 | rs142812798S7  | DIAPH1       | 1.65E-12 | 6.74E-05    | 3.16E-09   | 3.12E-09 | 0.127195 | 6.59E-06    |
| phe.Fasting_rs73864714 | S8 | NEK1 | rs143377827S13 | "DIAPH1,LOC  | 1.45E-12 | 5.90E-05    | 2.83E-09   | 2.57E-09 | 0.104505 | 5.52E-06    |
| phe.Fasting_rs73864714 | S8 | NEK1 | rs143691978S11 | DIAPH1       | 1.65E-12 | 6.74E-05    | 3.16E-09   | 5.06E-09 | 0.206028 | 1.01E-05    |
| phe.Fasting_rs73864714 | S8 | NEK1 | rs144081334S11 | DIAPH1       | 1.65E-12 | 6.74E-05    | 3.16E-09   | 5.06E-09 | 0.206028 | 1.01E-05    |
| phe.Fasting_rs73864714 | S8 | NEK1 | rs144613910S8  | DIAPH1       | 9.17E-12 | 0.000374383 | 1.48E-08   | 2.23E-08 | 0.908274 | 3.74E-05    |
| phe.Fasting_rs73864714 | S8 | NEK1 | rs145027704S11 | DIAPH1       | 1.65E-12 | 6.74E-05    | 3.16E-09   | 5.06E-09 | 0.206028 | 1.01E-05    |
| phe.Fasting_rs73864714 | S8 | NEK1 | rs146220673S7  | DIAPH1       | 9.17E-12 | 0.000374383 | 1.48E-08   | 2.23E-08 | 0.908274 | 3.74E-05    |
| phe.Fasting_rs73864714 | S8 | NEK1 | rs146622060S13 | DIAPH1       | 1.65E-12 | 6.74E-05    | 3.16E-09   | 5.06E-09 | 0.206028 | 1.01E-05    |
| phe.Fasting_rs73864714 | S8 | NEK1 | rs146815317S5  | KPNA3        | 3.50E-16 | 1.43E-08    | 1.15E-12   | 2.15E-07 | 1        | 0.000281471 |
| phe.Fasting_rs73864714 | S8 | NEK1 | rs146878162S7  | DIAPH1       | 9.17E-12 | 3.74E-04    | 1.48E-08   | 2.23E-08 | 0.908274 | 3.74E-05    |
| phe.Fasting_rs73864714 | S8 | NEK1 | rs1470889 S5   | ZC3H3        | 3.60E-08 | 1           | 3.04E-05   | 6.78E-07 | 1        | 0.000791674 |
| phe.Fasting_rs73864714 | S8 | NEK1 | rs1470890 S5   | ZC3H3        | 3.60E-08 | 1.00E+00    | 3.04E-05   | 6.78E-07 | 1        | 7.92E-04    |
| phe.Fasting_rs73864714 | S8 | NEK1 | rs147314451S8  | DIAPH1       | 9.17E-12 | 3.74E-04    | 1.48E-08   | 2.23E-08 | 0.908274 | 3.74E-05    |
| phe.Fasting_rs73864714 | S8 | NEK1 | rs147417996S7  | DIAPH1       | 1.65E-12 | 6.74E-05    | 3.16E-09   | 5.06E-09 | 0.206028 | 1.01E-05    |
| phe.Fasting_rs73864714 | S8 | NEK1 | rs147506725S21 | "PCDHGA1,PI  | 2.15E-05 | 1.00E+00    | 8.87E-03   | 2.34E-07 | 1        | 0.000303649 |
| phe.Fasting_rs73864714 | S8 | NEK1 | rs147646948S7  | "LOC1005056  | 9.17E-12 | 3.74E-04    | 1.48E-08   | 2.23E-08 | 0.908274 | 3.74E-05    |
| phe.Fasting_rs73864714 | S8 | NEK1 | rs147677041S8  | DIAPH1       | 1.65E-12 | 6.74E-05    | 3.16E-09   | 3.12E-09 | 0.127195 | 6.59E-06    |
| phe.Fasting_rs73864714 | S8 | NEK1 | rs148116628S7  | DIAPH1       | 9.17E-12 | 0.000374383 | 1.48E-08   | 2.23E-08 | 0.908274 | 3.74E-05    |
| phe.Fasting_rs73864714 | S8 | NEK1 | rs148423011S7  | DIAPH1       | 9.17E-12 | 3.74E-04    | 1.48E-08   | 2.23E-08 | 0.908274 | 3.74E-05    |
| phe.Fasting_rs73864714 | S8 | NEK1 | rs149019627S8  | DIAPH1       | 1.65E-12 | 6.74E-05    | 3.16E-09   | 3.12E-09 | 0.127195 | 6.59E-06    |
| phe.Fasting_rs73864714 | S8 | NEK1 | rs149075406S8  | DIAPH1       | 9.17E-12 | 3.74E-04    | 1.48E-08   | 2.23E-08 | 0.908274 | 3.74E-05    |
| phe.Fasting_rs73864714 | S8 | NEK1 | rs149334783S8  | DIAPH1       | 9.17E-12 | 3.74E-04    | 1.48E-08   | 2.23E-08 | 0.908274 | 3.74E-05    |
| phe.Fasting_rs73864714 | S8 | NEK1 | rs149553852S21 | "PCDHGA10,PI | 2.15E-05 | 1.00E+00    | 8.87E-03   | 2.34E-07 | 1        | 0.000303649 |
| phe.Fasting_rs73864714 | S8 | NEK1 | rs149716949S5  | DIAPH1       | 7.67E-13 | 3.13E-05    | 1.59E-09   | 2.72E-09 | 0.110842 | 5.82E-06    |
| phe.Fasting_rs73864714 | S8 | NEK1 | rs149791570S5  | DIAPH1       | 1.65E-12 | 6.74E-05    | 3.16E-09   | 3.12E-09 | 0.127195 | 6.59E-06    |
| phe.Fasting_rs73864714 | S8 | NEK1 | rs150117838S8  | KPNA3        | 3.50E-16 | 1.43E-08    | 1.15E-12   | 2.05E-07 | 1        | 0.000270369 |
| phe.Fasting_rs73864714 | S8 | NEK1 | rs150452206S13 | "DIAPH1,LOC  | 9.17E-12 | 3.74E-04    | 1.48E-08   | 2.23E-08 | 0.908274 | 3.74E-05    |
| phe.Fasting_rs73864714 | S8 | NEK1 | rs150675915S7  | DIAPH1       | 9.17E-12 | 0.000374383 | 1.48E-08   | 2.23E-08 | 0.908274 | 3.74E-05    |
| phe.Fasting_rs73864714 | S8 | NEK1 | rs150765570S7  | DIAPH1       | 9.17E-12 | 3.74E-04    | 1.48E-08   | 2.23E-08 | 0.908274 | 3.74E-05    |
| phe.Fasting_rs73864714 | S8 | NEK1 | rs150992994S11 | "PCDHGA5,PI  | 9.47E-12 | 3.87E-04    | 1.52E-08   | 2.14E-08 | 0.869105 | 3.65E-05    |
| phe.Fasting_rs73864714 | S8 | NEK1 | rs151204700S8  | DIAPH1       | 9.17E-12 | 0.000374383 | 1.48E-08   | 2.23E-08 | 0.908274 | 3.74E-05    |
| phe.Fasting_rs73864714 | S8 | NEK1 | rs151330468S8  | DIAPH1       | 1.65E-12 | 6.74E-05    | 3.16E-09   | 5.06E-09 | 0.206028 | 1.01E-05    |
| phe.Fasting_rs73864714 | S8 | NEK1 | rs16894241 S4  | HIST1H2BK    | 5.24E-08 | 1           | 4.28E-05   | 5.37E-07 | 1        | 0.000638437 |
| phe.Fasting_rs73864714 | S8 | NEK1 | rs180772028S8  | "DIAPH1,LOC  | 9.17E-12 | 0.000374383 | 1.48E-08   | 2.23E-08 | 0.908274 | 3.74E-05    |
| phe.Fasting_rs73864714 | S8 | NEK1 | rs181224861S7  | DIAPH1       | 9.17E-12 | 0.000374383 | 1.48E-08   | 2.23E-08 | 0.908274 | 3.74E-05    |
| phe.Fasting_rs73864714 | S8 | NEK1 | rs181247960S21 | "PCDHGA9,PI  | 2.15E-05 | 1           | 0.00887266 | 2.34E-07 | 1        | 0.000303649 |
| phe.Fasting_rs73864714 | S8 | NEK1 | rs181824655S21 | "PCDHGB6,PI  | 2.15E-05 | 1           | 0.00887266 | 2.34E-07 | 1        | 0.000303649 |
| phe.Fasting_rs73864714 | S8 | NEK1 | rs182714699S8  | DIAPH1       | 9.17E-12 | 0.000374383 | 1.48E-08   | 2.23E-08 | 0.908274 | 3.74E-05    |

|                        |    |      |             |     |             |          |             |          |          |           |             |
|------------------------|----|------|-------------|-----|-------------|----------|-------------|----------|----------|-----------|-------------|
| phe.Fasting_rs73864714 | S8 | NEK1 | rs182965141 | S8  | DIAPH1      | 2.01E-12 | 8.19E-05    | 3.80E-09 | 1.71E-09 | 0.0696833 | 3.83E-06    |
| phe.Fasting_rs73864714 | S8 | NEK1 | rs183597049 | S7  | DIAPH1      | 9.17E-12 | 0.000374383 | 1.48E-08 | 2.23E-08 | 0.908274  | 3.74E-05    |
| phe.Fasting_rs73864714 | S8 | NEK1 | rs183980988 | S2  | NA          | 9.17E-12 | 3.74E-04    | 1.48E-08 | 2.23E-08 | 0.908274  | 3.74E-05    |
| phe.Fasting_rs73864714 | S8 | NEK1 | rs184233232 | S7  | DIAPH1      | 9.17E-12 | 3.74E-04    | 1.48E-08 | 2.23E-08 | 0.908274  | 3.74E-05    |
| phe.Fasting_rs73864714 | S8 | NEK1 | rs184509477 | S13 | "PCDHGB4,PI | 9.17E-12 | 3.74E-04    | 1.48E-08 | 2.23E-08 | 0.908274  | 3.74E-05    |
| phe.Fasting_rs73864714 | S8 | NEK1 | rs185069296 | S15 | "LOC1005056 | 9.17E-12 | 0.000374383 | 1.48E-08 | 2.23E-08 | 0.908274  | 3.74E-05    |
| phe.Fasting_rs73864714 | S8 | NEK1 | rs185502834 | S8  | DIAPH1      | 1.65E-12 | 6.74E-05    | 3.16E-09 | 3.12E-09 | 0.127195  | 6.59E-06    |
| phe.Fasting_rs73864714 | S8 | NEK1 | rs185759881 | S7  | DIAPH1      | 9.17E-12 | 3.74E-04    | 1.48E-08 | 2.23E-08 | 0.908274  | 3.74E-05    |
| phe.Fasting_rs73864714 | S8 | NEK1 | rs186288044 | S21 | "PCDHGB4,PI | 2.15E-05 | 1.00E+00    | 8.87E-03 | 2.34E-07 | 1         | 0.000303649 |
| phe.Fasting_rs73864714 | S8 | NEK1 | rs187000011 | S11 | DIAPH1      | 9.17E-12 | 3.74E-04    | 1.48E-08 | 2.23E-08 | 0.908274  | 3.74E-05    |
| phe.Fasting_rs73864714 | S8 | NEK1 | rs188981295 | S5  | "RPS27AP10, | 9.17E-12 | 3.74E-04    | 1.48E-08 | 2.23E-08 | 0.908274  | 3.74E-05    |
| phe.Fasting_rs73864714 | S8 | NEK1 | rs190559574 | S7  | DIAPH1      | 1.65E-12 | 6.74E-05    | 3.16E-09 | 3.12E-09 | 0.127195  | 6.59E-06    |
| phe.Fasting_rs73864714 | S8 | NEK1 | rs191544043 | S8  | DIAPH1      | 9.17E-12 | 3.74E-04    | 1.48E-08 | 2.23E-08 | 0.908274  | 3.74E-05    |
| phe.Fasting_rs73864714 | S8 | NEK1 | rs191766712 | S7  | DIAPH1      | 9.17E-12 | 0.000374383 | 1.48E-08 | 2.23E-08 | 0.908274  | 3.74E-05    |
| phe.Fasting_rs73864714 | S8 | NEK1 | rs192690040 | S7  | DIAPH1      | 9.17E-12 | 0.000374383 | 1.48E-08 | 2.23E-08 | 0.908274  | 3.74E-05    |
| phe.Fasting_rs73864714 | S8 | NEK1 | rs192765219 | S7  | DIAPH1      | 9.17E-12 | 0.000374383 | 1.48E-08 | 2.23E-08 | 0.908274  | 3.74E-05    |
| phe.Fasting_rs73864714 | S8 | NEK1 | rs192770525 | S7  | DIAPH1      | 9.17E-12 | 0.000374383 | 1.48E-08 | 2.23E-08 | 0.908274  | 3.74E-05    |
| phe.Fasting_rs73864714 | S8 | NEK1 | rs2924507   | S5  | ZC3H3       | 3.60E-08 | 1           | 3.04E-05 | 6.78E-07 | 1         | 0.000791674 |
| phe.Fasting_rs73864714 | S8 | NEK1 | rs2924508   | S8  | ZC3H3       | 3.60E-08 | 1           | 3.04E-05 | 9.52E-07 | 1         | 0.00108069  |
| phe.Fasting_rs73864714 | S8 | NEK1 | rs2924511   | S7  | ZC3H3       | 3.60E-08 | 1.00E+00    | 3.04E-05 | 5.76E-07 | 1         | 0.000680958 |
| phe.Fasting_rs73864714 | S8 | NEK1 | rs2924512   | S7  | ZC3H3       | 4.02E-08 | 1           | 3.37E-05 | 7.17E-07 | 1         | 0.00083355  |
| phe.Fasting_rs73864714 | S8 | NEK1 | rs2956376   | S8  | ZC3H3       | 3.60E-08 | 1           | 3.04E-05 | 3.89E-07 | 1         | 0.000476148 |
| phe.Fasting_rs73864714 | S8 | NEK1 | rs2980270   | S7  | ZC3H3       | 3.60E-08 | 1           | 3.04E-05 | 3.89E-07 | 1         | 0.000476148 |
| phe.Fasting_rs73864714 | S8 | NEK1 | rs2980272   | S7  | ZC3H3       | 4.02E-08 | 1           | 3.37E-05 | 7.52E-07 | 1         | 0.000869902 |
| phe.Fasting_rs73864714 | S8 | NEK1 | rs2980275   | S5  | ZC3H3       | 3.60E-08 | 1.00E+00    | 3.04E-05 | 6.78E-07 | 1         | 0.000791674 |
| phe.Fasting_rs73864714 | S8 | NEK1 | rs35990401  | S7  | DIAPH1      | 8.40E-12 | 3.43E-04    | 1.39E-08 | 8.38E-09 | 0.340996  | 1.59E-05    |
| phe.Fasting_rs73864714 | S8 | NEK1 | rs366767    | S5  | ZC3H3       | 6.34E-08 | 1           | 5.08E-05 | 4.19E-07 | 1         | 0.000508745 |
| phe.Fasting_rs73864714 | S8 | NEK1 | rs55900860  | S7  | DIAPH1      | 1.65E-12 | 6.74E-05    | 3.16E-09 | 3.12E-09 | 0.127195  | 6.59E-06    |
| phe.Fasting_rs73864714 | S8 | NEK1 | rs6881310   | S23 | ISL1        | 4.23E-17 | 1.73E-09    | 2.22E-13 | 2.34E-12 | 9.53E-05  | 1.01E-08    |
| phe.Fasting_rs73864714 | S8 | NEK1 | rs73619637  | S8  | NA          | 1.02E-16 | 4.15E-09    | 4.31E-13 | 1.35E-08 | 0.549186  | 2.43E-05    |
| phe.Fasting_rs73864714 | S8 | NEK1 | rs77444916  | S23 | LOC642366   | 1.50E-17 | 6.11E-10    | 1.18E-13 | 8.75E-16 | 3.56E-08  | 1.16E-11    |
| phe.Fasting_rs73864714 | S8 | NEK1 | rs77798597  | S7  | KPNA3       | 3.50E-16 | 1.43E-08    | 1.15E-12 | 2.05E-07 | 1         | 0.000270369 |
| phe.Fasting_rs73864714 | S8 | NEK1 | rs78703708  | S7  | FAF2        | 9.25E-18 | 3.78E-10    | 9.24E-14 | 2.08E-07 | 1         | 0.000273911 |
| phe.Fasting_rs73864714 | S8 | NEK1 | rs78736524  | S5  | KPNA3       | 3.50E-16 | 1.43E-08    | 1.15E-12 | 2.15E-07 | 1         | 0.000281471 |
| phe.Fasting_rs73864714 | S8 | NEK1 | rs79517926  | S15 | "DIAPH1,LOC | 2.69E-12 | 0.000109672 | 4.97E-09 | 2.29E-09 | 0.0931701 | 4.98E-06    |
| phe.Fasting_rs73864714 | S8 | NEK1 | rs79781495  | S8  | KPNA3       | 3.50E-16 | 1.43E-08    | 1.15E-12 | 2.05E-07 | 1         | 0.000270369 |
| phe.Fasting_rs73864714 | S8 | NEK1 | rs80258830  | S24 | LOC642366   | 1.50E-17 | 6.11E-10    | 1.18E-13 | 8.75E-16 | 3.56E-08  | 1.16E-11    |
| phe.Fasting_rs73864714 | S8 | NEK1 | rs80332465  | S5  | KPNA3       | 3.75E-16 | 1.53E-08    | 1.22E-12 | 2.14E-07 | 1         | 0.000280922 |
| phe.Fasting_rs73864714 | S8 | NEK1 | rs80334773  | S5  | KPNA3       | 3.75E-16 | 1.53E-08    | 1.22E-12 | 2.14E-07 | 1         | 0.000280922 |
| phe.Fasting_rs73864724 | S8 | NEK1 | rs112027720 | S7  | DIAPH1      | 9.17E-12 | 3.74E-04    | 1.48E-08 | 2.32E-08 | 0.942747  | 3.85E-05    |

|                        |    |      |             |     |             |          |             |          |          |            |             |
|------------------------|----|------|-------------|-----|-------------|----------|-------------|----------|----------|------------|-------------|
| phe.Fasting_rs73864724 | S8 | NEK1 | rs112089881 | S8  | ZFAND4      | 1.84E-18 | 7.51E-11    | 3.89E-14 | 5.69E-09 | 0.231497   | 1.11E-05    |
| phe.Fasting_rs73864724 | S8 | NEK1 | rs113219478 | S7  | DIAPH1      | 9.17E-12 | 3.74E-04    | 1.48E-08 | 2.32E-08 | 0.942747   | 3.85E-05    |
| phe.Fasting_rs73864724 | S8 | NEK1 | rs113357907 | S24 | ISL1        | 6.12E-18 | 2.50E-10    | 7.50E-14 | 8.90E-16 | 3.62E-08   | 1.16E-11    |
| phe.Fasting_rs73864724 | S8 | NEK1 | rs115787552 | S5  | KPNA3       | 3.50E-16 | 1.43E-08    | 1.15E-12 | 2.22E-07 | 1          | 0.000289987 |
| phe.Fasting_rs73864724 | S8 | NEK1 | rs115888477 | S8  | NA          | 2.70E-15 | 1.10E-07    | 7.57E-12 | 1.69E-08 | 0.68669    | 2.95E-05    |
| phe.Fasting_rs73864724 | S8 | NEK1 | rs116011837 | S9  | BRD2        | 2.29E-17 | 9.34E-10    | 1.45E-13 | 2.23E-10 | 0.00906089 | 6.23E-07    |
| phe.Fasting_rs73864724 | S8 | NEK1 | rs116079984 | S8  | KPNA3       | 3.50E-16 | 1.43E-08    | 1.15E-12 | 2.60E-07 | 1          | 0.000333919 |
| phe.Fasting_rs73864724 | S8 | NEK1 | rs116120727 | S9  | BRD2        | 2.29E-17 | 9.34E-10    | 1.45E-13 | 2.23E-10 | 0.00906089 | 6.23E-07    |
| phe.Fasting_rs73864724 | S8 | NEK1 | rs116279995 | S20 | "PCDHGA4,PI | 2.15E-05 | 1           | 8.87E-03 | 2.44E-07 | 1          | 0.00031541  |
| phe.Fasting_rs73864724 | S8 | NEK1 | rs138090701 | S5  | HDAC3       | 1.02E-12 | 4.17E-05    | 2.10E-09 | 1.39E-08 | 0.565314   | 2.49E-05    |
| phe.Fasting_rs73864724 | S8 | NEK1 | rs138136869 | S7  | DIAPH1      | 1.65E-12 | 6.74E-05    | 3.16E-09 | 3.13E-09 | 0.127325   | 6.59E-06    |
| phe.Fasting_rs73864724 | S8 | NEK1 | rs138457103 | S10 | DIAPH1      | 5.43E-12 | 0.000221795 | 9.60E-09 | 2.17E-08 | 0.884483   | 3.70E-05    |
| phe.Fasting_rs73864724 | S8 | NEK1 | rs138487229 | S11 | DIAPH1      | 9.17E-12 | 0.000374383 | 1.48E-08 | 2.32E-08 | 0.942747   | 3.85E-05    |
| phe.Fasting_rs73864724 | S8 | NEK1 | rs138738950 | S8  | "PCDHGB2,PI | 9.17E-12 | 0.000374383 | 1.48E-08 | 2.31E-08 | 0.939094   | 3.85E-05    |
| phe.Fasting_rs73864724 | S8 | NEK1 | rs139297927 | S8  | DIAPH1      | 9.17E-12 | 3.74E-04    | 1.48E-08 | 2.32E-08 | 0.942747   | 3.85E-05    |
| phe.Fasting_rs73864724 | S8 | NEK1 | rs139337303 | S8  | DIAPH1      | 9.17E-12 | 0.000374383 | 1.48E-08 | 2.32E-08 | 0.942747   | 3.85E-05    |
| phe.Fasting_rs73864724 | S8 | NEK1 | rs139403963 | S8  | DIAPH1      | 1.65E-12 | 6.74E-05    | 3.16E-09 | 3.13E-09 | 0.127325   | 6.59E-06    |
| phe.Fasting_rs73864724 | S8 | NEK1 | rs139621309 | S18 | "LOC1005056 | 9.17E-12 | 0.000374383 | 1.48E-08 | 2.32E-08 | 0.942747   | 3.85E-05    |
| phe.Fasting_rs73864724 | S8 | NEK1 | rs139828110 | S8  | DIAPH1      | 1.65E-12 | 6.74E-05    | 3.16E-09 | 3.13E-09 | 0.127325   | 6.59E-06    |
| phe.Fasting_rs73864724 | S8 | NEK1 | rs140070363 | S8  | DIAPH1      | 9.17E-12 | 3.74E-04    | 1.48E-08 | 2.32E-08 | 0.942747   | 3.85E-05    |
| phe.Fasting_rs73864724 | S8 | NEK1 | rs140644750 | S13 | DIAPH1      | 9.17E-12 | 3.74E-04    | 1.48E-08 | 2.32E-08 | 0.942747   | 3.85E-05    |
| phe.Fasting_rs73864724 | S8 | NEK1 | rs141022544 | S8  | DIAPH1      | 9.17E-12 | 0.000374383 | 1.48E-08 | 2.32E-08 | 0.942747   | 3.85E-05    |
| phe.Fasting_rs73864724 | S8 | NEK1 | rs141525984 | S5  | DIAPH1      | 9.17E-12 | 3.74E-04    | 1.48E-08 | 2.32E-08 | 0.942747   | 3.85E-05    |
| phe.Fasting_rs73864724 | S8 | NEK1 | rs141926074 | S8  | ATE1        | 1.33E-06 | 1.00E+00    | 7.83E-04 | 2.03E-14 | 8.25E-07   | 1.62E-10    |
| phe.Fasting_rs73864724 | S8 | NEK1 | rs142480565 | S8  | DIAPH1      | 9.17E-12 | 3.74E-04    | 1.48E-08 | 2.32E-08 | 0.942747   | 3.85E-05    |
| phe.Fasting_rs73864724 | S8 | NEK1 | rs142718558 | S7  | "DIAPH1,LOC | 9.17E-12 | 3.74E-04    | 1.48E-08 | 2.32E-08 | 0.942747   | 3.85E-05    |
| phe.Fasting_rs73864724 | S8 | NEK1 | rs142789100 | S8  | DIAPH1      | 1.65E-12 | 6.74E-05    | 3.16E-09 | 3.13E-09 | 0.127325   | 6.59E-06    |
| phe.Fasting_rs73864724 | S8 | NEK1 | rs142812798 | S7  | DIAPH1      | 1.65E-12 | 6.74E-05    | 3.16E-09 | 3.13E-09 | 0.127325   | 6.59E-06    |
| phe.Fasting_rs73864724 | S8 | NEK1 | rs143377827 | S13 | "DIAPH1,LOC | 1.45E-12 | 5.90E-05    | 2.83E-09 | 2.58E-09 | 0.105219   | 5.55E-06    |
| phe.Fasting_rs73864724 | S8 | NEK1 | rs143691978 | S11 | DIAPH1      | 1.65E-12 | 6.74E-05    | 3.16E-09 | 5.09E-09 | 0.206989   | 1.01E-05    |
| phe.Fasting_rs73864724 | S8 | NEK1 | rs144081334 | S11 | DIAPH1      | 1.65E-12 | 6.74E-05    | 3.16E-09 | 5.09E-09 | 0.206989   | 1.01E-05    |
| phe.Fasting_rs73864724 | S8 | NEK1 | rs144613910 | S8  | DIAPH1      | 9.17E-12 | 3.74E-04    | 1.48E-08 | 2.32E-08 | 0.942747   | 3.85E-05    |
| phe.Fasting_rs73864724 | S8 | NEK1 | rs145027704 | S11 | DIAPH1      | 1.65E-12 | 6.74E-05    | 3.16E-09 | 5.09E-09 | 0.206989   | 1.01E-05    |
| phe.Fasting_rs73864724 | S8 | NEK1 | rs146220673 | S7  | DIAPH1      | 9.17E-12 | 3.74E-04    | 1.48E-08 | 2.32E-08 | 0.942747   | 3.85E-05    |
| phe.Fasting_rs73864724 | S8 | NEK1 | rs146622060 | S13 | DIAPH1      | 1.65E-12 | 6.74E-05    | 3.16E-09 | 5.09E-09 | 0.206989   | 1.01E-05    |
| phe.Fasting_rs73864724 | S8 | NEK1 | rs146815317 | S5  | KPNA3       | 3.50E-16 | 1.43E-08    | 1.15E-12 | 2.22E-07 | 1          | 0.000289987 |
| phe.Fasting_rs73864724 | S8 | NEK1 | rs146878162 | S7  | DIAPH1      | 9.17E-12 | 3.74E-04    | 1.48E-08 | 2.32E-08 | 0.942747   | 3.85E-05    |
| phe.Fasting_rs73864724 | S8 | NEK1 | rs1470889   | S5  | ZC3H3       | 3.60E-08 | 1.00E+00    | 3.04E-05 | 7.22E-07 | 1          | 8.38E-04    |
| phe.Fasting_rs73864724 | S8 | NEK1 | rs1470890   | S5  | ZC3H3       | 3.60E-08 | 1           | 3.04E-05 | 7.22E-07 | 1          | 8.38E-04    |
| phe.Fasting_rs73864724 | S8 | NEK1 | rs147314451 | S8  | DIAPH1      | 9.17E-12 | 3.74E-04    | 1.48E-08 | 2.32E-08 | 0.942747   | 3.85E-05    |

|                        |    |      |                |             |          |             |          |          |           |             |
|------------------------|----|------|----------------|-------------|----------|-------------|----------|----------|-----------|-------------|
| phe.Fasting_rs73864724 | S8 | NEK1 | rs147417996S7  | DIAPH1      | 1.65E-12 | 6.74E-05    | 3.16E-09 | 5.09E-09 | 0.206989  | 1.01E-05    |
| phe.Fasting_rs73864724 | S8 | NEK1 | rs147506725S21 | "PCDHGA1,Pi | 2.15E-05 | 1           | 8.87E-03 | 2.44E-07 | 1         | 0.00031541  |
| phe.Fasting_rs73864724 | S8 | NEK1 | rs147646948S7  | "LOC1005056 | 9.17E-12 | 0.000374383 | 1.48E-08 | 2.32E-08 | 0.942747  | 3.85E-05    |
| phe.Fasting_rs73864724 | S8 | NEK1 | rs147677041S8  | DIAPH1      | 1.65E-12 | 6.74E-05    | 3.16E-09 | 3.13E-09 | 0.127325  | 6.59E-06    |
| phe.Fasting_rs73864724 | S8 | NEK1 | rs148116628S7  | DIAPH1      | 9.17E-12 | 3.74E-04    | 1.48E-08 | 2.32E-08 | 0.942747  | 3.85E-05    |
| phe.Fasting_rs73864724 | S8 | NEK1 | rs148423011S7  | DIAPH1      | 9.17E-12 | 3.74E-04    | 1.48E-08 | 2.32E-08 | 0.942747  | 3.85E-05    |
| phe.Fasting_rs73864724 | S8 | NEK1 | rs149019627S8  | DIAPH1      | 1.65E-12 | 6.74E-05    | 3.16E-09 | 3.13E-09 | 0.127325  | 6.59E-06    |
| phe.Fasting_rs73864724 | S8 | NEK1 | rs149075406S8  | DIAPH1      | 9.17E-12 | 0.000374383 | 1.48E-08 | 2.32E-08 | 0.942747  | 3.85E-05    |
| phe.Fasting_rs73864724 | S8 | NEK1 | rs149334783S8  | DIAPH1      | 9.17E-12 | 3.74E-04    | 1.48E-08 | 2.32E-08 | 0.942747  | 3.85E-05    |
| phe.Fasting_rs73864724 | S8 | NEK1 | rs149553852S21 | "PCDHGA10,I | 2.15E-05 | 1.00E+00    | 8.87E-03 | 2.44E-07 | 1         | 0.00031541  |
| phe.Fasting_rs73864724 | S8 | NEK1 | rs149716949S5  | DIAPH1      | 7.67E-13 | 3.13E-05    | 1.59E-09 | 2.82E-09 | 0.11499   | 6.01E-06    |
| phe.Fasting_rs73864724 | S8 | NEK1 | rs149791570S5  | DIAPH1      | 1.65E-12 | 6.74E-05    | 3.16E-09 | 3.13E-09 | 0.127325  | 6.59E-06    |
| phe.Fasting_rs73864724 | S8 | NEK1 | rs150117838S8  | KPNA3       | 3.50E-16 | 1.43E-08    | 1.15E-12 | 2.12E-07 | 1         | 0.000278281 |
| phe.Fasting_rs73864724 | S8 | NEK1 | rs150452206S13 | "DIAPH1,LOC | 9.17E-12 | 3.74E-04    | 1.48E-08 | 2.32E-08 | 0.942747  | 3.85E-05    |
| phe.Fasting_rs73864724 | S8 | NEK1 | rs150675915S7  | DIAPH1      | 9.17E-12 | 3.74E-04    | 1.48E-08 | 2.32E-08 | 0.942747  | 3.85E-05    |
| phe.Fasting_rs73864724 | S8 | NEK1 | rs150765570S7  | DIAPH1      | 9.17E-12 | 0.000374383 | 1.48E-08 | 2.32E-08 | 0.942747  | 3.85E-05    |
| phe.Fasting_rs73864724 | S8 | NEK1 | rs150992994S11 | "PCDHGA5,Pi | 9.47E-12 | 0.000386737 | 1.52E-08 | 2.23E-08 | 0.906871  | 3.74E-05    |
| phe.Fasting_rs73864724 | S8 | NEK1 | rs151204700S8  | DIAPH1      | 9.17E-12 | 0.000374383 | 1.48E-08 | 2.32E-08 | 0.942747  | 3.85E-05    |
| phe.Fasting_rs73864724 | S8 | NEK1 | rs151330468S8  | DIAPH1      | 1.65E-12 | 6.74E-05    | 3.16E-09 | 5.09E-09 | 0.206989  | 1.01E-05    |
| phe.Fasting_rs73864724 | S8 | NEK1 | rs16894241 S4  | HIST1H2BK   | 5.24E-08 | 1           | 4.28E-05 | 5.37E-07 | 1         | 0.000638224 |
| phe.Fasting_rs73864724 | S8 | NEK1 | rs180772028S8  | "DIAPH1,LOC | 9.17E-12 | 0.000374383 | 1.48E-08 | 2.32E-08 | 0.942747  | 3.85E-05    |
| phe.Fasting_rs73864724 | S8 | NEK1 | rs181224861S7  | DIAPH1      | 9.17E-12 | 3.74E-04    | 1.48E-08 | 2.32E-08 | 0.942747  | 3.85E-05    |
| phe.Fasting_rs73864724 | S8 | NEK1 | rs181247960S21 | "PCDHGA9,Pi | 2.15E-05 | 1           | 8.87E-03 | 2.44E-07 | 1         | 0.00031541  |
| phe.Fasting_rs73864724 | S8 | NEK1 | rs181824655S21 | "PCDHGB6,Pi | 2.15E-05 | 1           | 8.87E-03 | 2.44E-07 | 1         | 0.00031541  |
| phe.Fasting_rs73864724 | S8 | NEK1 | rs182714699S8  | DIAPH1      | 9.17E-12 | 0.000374383 | 1.48E-08 | 2.32E-08 | 0.942747  | 3.85E-05    |
| phe.Fasting_rs73864724 | S8 | NEK1 | rs182965141S8  | DIAPH1      | 2.01E-12 | 8.19E-05    | 3.80E-09 | 1.71E-09 | 0.0696643 | 3.83E-06    |
| phe.Fasting_rs73864724 | S8 | NEK1 | rs183597049S7  | DIAPH1      | 9.17E-12 | 3.74E-04    | 1.48E-08 | 2.32E-08 | 0.942747  | 3.85E-05    |
| phe.Fasting_rs73864724 | S8 | NEK1 | rs183980988S2  | NA          | 9.17E-12 | 3.74E-04    | 1.48E-08 | 2.32E-08 | 0.942747  | 3.85E-05    |
| phe.Fasting_rs73864724 | S8 | NEK1 | rs184233232S7  | DIAPH1      | 9.17E-12 | 0.000374383 | 1.48E-08 | 2.32E-08 | 0.942747  | 3.85E-05    |
| phe.Fasting_rs73864724 | S8 | NEK1 | rs184509477S13 | "PCDHGB4,Pi | 9.17E-12 | 3.74E-04    | 1.48E-08 | 2.32E-08 | 0.942747  | 3.85E-05    |
| phe.Fasting_rs73864724 | S8 | NEK1 | rs185069296S15 | "LOC1005056 | 9.17E-12 | 3.74E-04    | 1.48E-08 | 2.32E-08 | 0.942747  | 3.85E-05    |
| phe.Fasting_rs73864724 | S8 | NEK1 | rs185502834S8  | DIAPH1      | 1.65E-12 | 6.74E-05    | 3.16E-09 | 3.13E-09 | 0.127325  | 6.59E-06    |
| phe.Fasting_rs73864724 | S8 | NEK1 | rs185759881S7  | DIAPH1      | 9.17E-12 | 3.74E-04    | 1.48E-08 | 2.32E-08 | 0.942747  | 3.85E-05    |
| phe.Fasting_rs73864724 | S8 | NEK1 | rs186288044S21 | "PCDHGB4,Pi | 2.15E-05 | 1.00E+00    | 8.87E-03 | 2.44E-07 | 1         | 0.00031541  |
| phe.Fasting_rs73864724 | S8 | NEK1 | rs187000011S11 | DIAPH1      | 9.17E-12 | 3.74E-04    | 1.48E-08 | 2.32E-08 | 0.942747  | 3.85E-05    |
| phe.Fasting_rs73864724 | S8 | NEK1 | rs188981295S5  | "RPS27AP10, | 9.17E-12 | 0.000374383 | 1.48E-08 | 2.32E-08 | 0.942747  | 3.85E-05    |
| phe.Fasting_rs73864724 | S8 | NEK1 | rs190559574S7  | DIAPH1      | 1.65E-12 | 6.74E-05    | 3.16E-09 | 3.13E-09 | 0.127325  | 6.59E-06    |
| phe.Fasting_rs73864724 | S8 | NEK1 | rs191544043S8  | DIAPH1      | 9.17E-12 | 3.74E-04    | 1.48E-08 | 2.32E-08 | 0.942747  | 3.85E-05    |
| phe.Fasting_rs73864724 | S8 | NEK1 | rs191766712S7  | DIAPH1      | 9.17E-12 | 3.74E-04    | 1.48E-08 | 2.32E-08 | 0.942747  | 3.85E-05    |
| phe.Fasting_rs73864724 | S8 | NEK1 | rs192690040S7  | DIAPH1      | 9.17E-12 | 3.74E-04    | 1.48E-08 | 2.32E-08 | 0.942747  | 3.85E-05    |



|                        |    |      |                |             |          |             |          |          |           |             |
|------------------------|----|------|----------------|-------------|----------|-------------|----------|----------|-----------|-------------|
| phe.Fasting_rs73864724 | S8 | NEK1 | rs192765219S7  | DIAPH1      | 9.17E-12 | 0.000374383 | 1.48E-08 | 2.32E-08 | 0.942747  | 3.85E-05    |
| phe.Fasting_rs73864724 | S8 | NEK1 | rs192770525S7  | DIAPH1      | 9.17E-12 | 3.74E-04    | 1.48E-08 | 2.32E-08 | 0.942747  | 3.85E-05    |
| phe.Fasting_rs73864724 | S8 | NEK1 | rs2924507 S5   | ZC3H3       | 3.60E-08 | 1.00E+00    | 3.04E-05 | 7.22E-07 | 1         | 0.000838245 |
| phe.Fasting_rs73864724 | S8 | NEK1 | rs2924508 S8   | ZC3H3       | 3.60E-08 | 1.00E+00    | 3.04E-05 | 1.01E-06 | 1         | 0.00114263  |
| phe.Fasting_rs73864724 | S8 | NEK1 | rs2924511 S7   | ZC3H3       | 3.60E-08 | 1.00E+00    | 3.04E-05 | 6.12E-07 | 1         | 0.000721385 |
| phe.Fasting_rs73864724 | S8 | NEK1 | rs2924512 S7   | ZC3H3       | 4.02E-08 | 1.00E+00    | 3.37E-05 | 7.64E-07 | 1         | 0.000882892 |
| phe.Fasting_rs73864724 | S8 | NEK1 | rs2956376 S8   | ZC3H3       | 3.60E-08 | 1.00E+00    | 3.04E-05 | 4.13E-07 | 1         | 0.000502027 |
| phe.Fasting_rs73864724 | S8 | NEK1 | rs2980270 S7   | ZC3H3       | 3.60E-08 | 1.00E+00    | 3.04E-05 | 4.13E-07 | 1         | 0.000502027 |
| phe.Fasting_rs73864724 | S8 | NEK1 | rs2980272 S7   | ZC3H3       | 4.02E-08 | 1           | 3.37E-05 | 8.01E-07 | 1         | 0.000921735 |
| phe.Fasting_rs73864724 | S8 | NEK1 | rs2980275 S5   | ZC3H3       | 3.60E-08 | 1           | 3.04E-05 | 7.22E-07 | 1         | 0.000838245 |
| phe.Fasting_rs73864724 | S8 | NEK1 | rs35990401 S7  | DIAPH1      | 8.40E-12 | 0.000343123 | 1.39E-08 | 8.71E-09 | 0.354487  | 1.65E-05    |
| phe.Fasting_rs73864724 | S8 | NEK1 | rs366767 S5    | ZC3H3       | 6.34E-08 | 1           | 5.08E-05 | 4.43E-07 | 1         | 0.000534886 |
| phe.Fasting_rs73864724 | S8 | NEK1 | rs55900860 S7  | DIAPH1      | 1.65E-12 | 6.74E-05    | 3.16E-09 | 3.13E-09 | 0.127325  | 6.59E-06    |
| phe.Fasting_rs73864724 | S8 | NEK1 | rs6881310 S23  | ISL1        | 4.23E-17 | 1.73E-09    | 2.22E-13 | 2.33E-12 | 9.47E-05  | 1.00E-08    |
| phe.Fasting_rs73864724 | S8 | NEK1 | rs73619637 S8  | NA          | 1.02E-16 | 4.15E-09    | 4.31E-13 | 1.39E-08 | 0.566894  | 2.49E-05    |
| phe.Fasting_rs73864724 | S8 | NEK1 | rs77444916 S23 | LOC642366   | 1.50E-17 | 6.11E-10    | 1.18E-13 | 8.34E-16 | 3.40E-08  | 1.16E-11    |
| phe.Fasting_rs73864724 | S8 | NEK1 | rs77798597 S7  | KPNA3       | 3.50E-16 | 1.43E-08    | 1.15E-12 | 2.12E-07 | 1         | 0.000278281 |
| phe.Fasting_rs73864724 | S8 | NEK1 | rs78703708 S7  | FAF2        | 9.25E-18 | 3.78E-10    | 9.24E-14 | 1.57E-07 | 1         | 0.000212577 |
| phe.Fasting_rs73864724 | S8 | NEK1 | rs78736524 S5  | KPNA3       | 3.50E-16 | 1.43E-08    | 1.15E-12 | 2.22E-07 | 1         | 0.000289987 |
| phe.Fasting_rs73864724 | S8 | NEK1 | rs79517926 S15 | "DIAPH1,LOC | 2.69E-12 | 1.10E-04    | 4.97E-09 | 2.39E-09 | 0.0971596 | 5.17E-06    |
| phe.Fasting_rs73864724 | S8 | NEK1 | rs79781495 S8  | KPNA3       | 3.50E-16 | 1.43E-08    | 1.15E-12 | 2.12E-07 | 1         | 0.000278281 |
| phe.Fasting_rs73864724 | S8 | NEK1 | rs80258830 S24 | LOC642366   | 1.50E-17 | 6.11E-10    | 1.18E-13 | 8.34E-16 | 3.40E-08  | 1.16E-11    |
| phe.Fasting_rs73864724 | S8 | NEK1 | rs80332465 S5  | KPNA3       | 3.75E-16 | 1.53E-08    | 1.22E-12 | 2.21E-07 | 1         | 2.89E-04    |
| phe.Fasting_rs73864724 | S8 | NEK1 | rs80334773 S5  | KPNA3       | 3.75E-16 | 1.53E-08    | 1.22E-12 | 2.21E-07 | 1         | 0.000289439 |
| phe.Fasting_rs73864726 | S8 | NEK1 | rs112027720S7  | DIAPH1      | 9.17E-12 | 3.74E-04    | 1.48E-08 | 3.09E-08 | 1         | 4.98E-05    |
| phe.Fasting_rs73864726 | S8 | NEK1 | rs112089881S8  | ZFAND4      | 1.84E-18 | 7.51E-11    | 3.89E-14 | 7.39E-09 | 0.300904  | 1.42E-05    |
| phe.Fasting_rs73864726 | S8 | NEK1 | rs113219478S7  | DIAPH1      | 9.17E-12 | 3.74E-04    | 1.48E-08 | 3.09E-08 | 1         | 4.98E-05    |
| phe.Fasting_rs73864726 | S8 | NEK1 | rs113357907S24 | ISL1        | 6.12E-18 | 2.50E-10    | 7.50E-14 | 1.27E-15 | 5.16E-08  | 1.44E-11    |
| phe.Fasting_rs73864726 | S8 | NEK1 | rs115787552S5  | KPNA3       | 3.50E-16 | 1.43E-08    | 1.15E-12 | 3.13E-07 | 1         | 0.000393894 |
| phe.Fasting_rs73864726 | S8 | NEK1 | rs115888477S8  | NA          | 2.70E-15 | 1.10E-07    | 7.57E-12 | 2.44E-08 | 0.994402  | 4.03E-05    |
| phe.Fasting_rs73864726 | S8 | NEK1 | rs116011837S9  | BRD2        | 2.29E-17 | 9.34E-10    | 1.45E-13 | 3.18E-10 | 0.0129556 | 8.55E-07    |
| phe.Fasting_rs73864726 | S8 | NEK1 | rs116079984S8  | KPNA3       | 3.50E-16 | 1.43E-08    | 1.15E-12 | 3.67E-07 | 1         | 0.000454306 |
| phe.Fasting_rs73864726 | S8 | NEK1 | rs116120727S9  | BRD2        | 2.29E-17 | 9.34E-10    | 1.45E-13 | 3.18E-10 | 0.0129556 | 8.55E-07    |
| phe.Fasting_rs73864726 | S8 | NEK1 | rs116279995S20 | "PCDHGA4,Pi | 2.15E-05 | 1.00E+00    | 8.87E-03 | 3.33E-07 | 1         | 0.000415605 |
| phe.Fasting_rs73864726 | S8 | NEK1 | rs138090701S5  | HDAC3       | 1.02E-12 | 4.17E-05    | 2.10E-09 | 1.93E-08 | 0.787129  | 3.33E-05    |
| phe.Fasting_rs73864726 | S8 | NEK1 | rs138136869S7  | DIAPH1      | 1.65E-12 | 6.74E-05    | 3.16E-09 | 4.45E-09 | 0.180939  | 9.00E-06    |
| phe.Fasting_rs73864726 | S8 | NEK1 | rs138457103S10 | DIAPH1      | 5.43E-12 | 2.22E-04    | 9.60E-09 | 2.89E-08 | 1         | 4.72E-05    |
| phe.Fasting_rs73864726 | S8 | NEK1 | rs138487229S11 | DIAPH1      | 9.17E-12 | 0.000374383 | 1.48E-08 | 3.09E-08 | 1         | 4.98E-05    |
| phe.Fasting_rs73864726 | S8 | NEK1 | rs138738950S8  | "PCDHGB2,Pi | 9.17E-12 | 0.000374383 | 1.48E-08 | 3.08E-08 | 1         | 4.98E-05    |
| phe.Fasting_rs73864726 | S8 | NEK1 | rs139297927S8  | DIAPH1      | 9.17E-12 | 3.74E-04    | 1.48E-08 | 3.09E-08 | 1         | 4.98E-05    |

|                        |    |      |             |     |             |          |             |          |          |          |             |
|------------------------|----|------|-------------|-----|-------------|----------|-------------|----------|----------|----------|-------------|
| phe.Fasting_rs73864726 | S8 | NEK1 | rs139337303 | S8  | DIAPH1      | 9.17E-12 | 3.74E-04    | 1.48E-08 | 3.09E-08 | 1        | 4.98E-05    |
| phe.Fasting_rs73864726 | S8 | NEK1 | rs139403963 | S8  | DIAPH1      | 1.65E-12 | 6.74E-05    | 3.16E-09 | 4.45E-09 | 0.180939 | 9.00E-06    |
| phe.Fasting_rs73864726 | S8 | NEK1 | rs139621309 | S18 | "LOC1005056 | 9.17E-12 | 3.74E-04    | 1.48E-08 | 3.09E-08 | 1        | 4.98E-05    |
| phe.Fasting_rs73864726 | S8 | NEK1 | rs139828110 | S8  | DIAPH1      | 1.65E-12 | 6.74E-05    | 3.16E-09 | 4.45E-09 | 0.180939 | 9.00E-06    |
| phe.Fasting_rs73864726 | S8 | NEK1 | rs140070363 | S8  | DIAPH1      | 9.17E-12 | 0.000374383 | 1.48E-08 | 3.09E-08 | 1        | 4.98E-05    |
| phe.Fasting_rs73864726 | S8 | NEK1 | rs140644750 | S13 | DIAPH1      | 9.17E-12 | 0.000374383 | 1.48E-08 | 3.09E-08 | 1        | 4.98E-05    |
| phe.Fasting_rs73864726 | S8 | NEK1 | rs141022544 | S8  | DIAPH1      | 9.17E-12 | 3.74E-04    | 1.48E-08 | 3.09E-08 | 1        | 4.98E-05    |
| phe.Fasting_rs73864726 | S8 | NEK1 | rs141525984 | S5  | DIAPH1      | 9.17E-12 | 3.74E-04    | 1.48E-08 | 3.09E-08 | 1        | 4.98E-05    |
| phe.Fasting_rs73864726 | S8 | NEK1 | rs141926074 | S8  | ATE1        | 1.33E-06 | 1.00E+00    | 7.83E-04 | 2.84E-14 | 1.16E-06 | 2.14E-10    |
| phe.Fasting_rs73864726 | S8 | NEK1 | rs142480565 | S8  | DIAPH1      | 9.17E-12 | 0.000374383 | 1.48E-08 | 3.09E-08 | 1        | 4.98E-05    |
| phe.Fasting_rs73864726 | S8 | NEK1 | rs142718558 | S7  | "DIAPH1,LOC | 9.17E-12 | 0.000374383 | 1.48E-08 | 3.09E-08 | 1        | 4.98E-05    |
| phe.Fasting_rs73864726 | S8 | NEK1 | rs142789100 | S8  | DIAPH1      | 1.65E-12 | 6.74E-05    | 3.16E-09 | 4.45E-09 | 0.180939 | 9.00E-06    |
| phe.Fasting_rs73864726 | S8 | NEK1 | rs142812798 | S7  | DIAPH1      | 1.65E-12 | 6.74E-05    | 3.16E-09 | 4.45E-09 | 0.180939 | 9.00E-06    |
| phe.Fasting_rs73864726 | S8 | NEK1 | rs143377827 | S13 | "DIAPH1,LOC | 1.45E-12 | 5.90E-05    | 2.83E-09 | 3.66E-09 | 0.14914  | 7.58E-06    |
| phe.Fasting_rs73864726 | S8 | NEK1 | rs143691978 | S11 | DIAPH1      | 1.65E-12 | 6.74E-05    | 3.16E-09 | 6.99E-09 | 0.284722 | 1.35E-05    |
| phe.Fasting_rs73864726 | S8 | NEK1 | rs144081334 | S11 | DIAPH1      | 1.65E-12 | 6.74E-05    | 3.16E-09 | 6.99E-09 | 0.284722 | 1.35E-05    |
| phe.Fasting_rs73864726 | S8 | NEK1 | rs144613910 | S8  | DIAPH1      | 9.17E-12 | 0.000374383 | 1.48E-08 | 3.09E-08 | 1        | 4.98E-05    |
| phe.Fasting_rs73864726 | S8 | NEK1 | rs145027704 | S11 | DIAPH1      | 1.65E-12 | 6.74E-05    | 3.16E-09 | 6.99E-09 | 0.284722 | 1.35E-05    |
| phe.Fasting_rs73864726 | S8 | NEK1 | rs146220673 | S7  | DIAPH1      | 9.17E-12 | 3.74E-04    | 1.48E-08 | 3.09E-08 | 1        | 4.98E-05    |
| phe.Fasting_rs73864726 | S8 | NEK1 | rs146622060 | S13 | DIAPH1      | 1.65E-12 | 6.74E-05    | 3.16E-09 | 6.99E-09 | 0.284722 | 1.35E-05    |
| phe.Fasting_rs73864726 | S8 | NEK1 | rs146815317 | S5  | KPNA3       | 3.50E-16 | 1.43E-08    | 1.15E-12 | 3.13E-07 | 1        | 3.94E-04    |
| phe.Fasting_rs73864726 | S8 | NEK1 | rs146878162 | S7  | DIAPH1      | 9.17E-12 | 0.000374383 | 1.48E-08 | 3.09E-08 | 1        | 4.98E-05    |
| phe.Fasting_rs73864726 | S8 | NEK1 | rs1470889   | S5  | ZC3H3       | 3.60E-08 | 1.00E+00    | 3.04E-05 | 1.27E-06 | 1        | 1.40E-03    |
| phe.Fasting_rs73864726 | S8 | NEK1 | rs1470890   | S5  | ZC3H3       | 3.60E-08 | 1           | 3.04E-05 | 1.27E-06 | 1        | 0.00139597  |
| phe.Fasting_rs73864726 | S8 | NEK1 | rs147314451 | S8  | DIAPH1      | 9.17E-12 | 3.74E-04    | 1.48E-08 | 3.09E-08 | 1        | 4.98E-05    |
| phe.Fasting_rs73864726 | S8 | NEK1 | rs147417996 | S7  | DIAPH1      | 1.65E-12 | 6.74E-05    | 3.16E-09 | 6.99E-09 | 0.284722 | 1.35E-05    |
| phe.Fasting_rs73864726 | S8 | NEK1 | rs147506725 | S21 | "PCDHGA1,Pi | 2.15E-05 | 1.00E+00    | 8.87E-03 | 3.33E-07 | 1        | 4.16E-04    |
| phe.Fasting_rs73864726 | S8 | NEK1 | rs147646948 | S7  | "LOC1005056 | 9.17E-12 | 3.74E-04    | 1.48E-08 | 3.09E-08 | 1        | 4.98E-05    |
| phe.Fasting_rs73864726 | S8 | NEK1 | rs147677041 | S8  | DIAPH1      | 1.65E-12 | 6.74E-05    | 3.16E-09 | 4.45E-09 | 0.180939 | 9.00E-06    |
| phe.Fasting_rs73864726 | S8 | NEK1 | rs148116628 | S7  | DIAPH1      | 9.17E-12 | 3.74E-04    | 1.48E-08 | 3.09E-08 | 1        | 4.98E-05    |
| phe.Fasting_rs73864726 | S8 | NEK1 | rs148423011 | S7  | DIAPH1      | 9.17E-12 | 0.000374383 | 1.48E-08 | 3.09E-08 | 1        | 4.98E-05    |
| phe.Fasting_rs73864726 | S8 | NEK1 | rs149019627 | S8  | DIAPH1      | 1.65E-12 | 6.74E-05    | 3.16E-09 | 4.45E-09 | 0.180939 | 9.00E-06    |
| phe.Fasting_rs73864726 | S8 | NEK1 | rs149075406 | S8  | DIAPH1      | 9.17E-12 | 3.74E-04    | 1.48E-08 | 3.09E-08 | 1        | 4.98E-05    |
| phe.Fasting_rs73864726 | S8 | NEK1 | rs149334783 | S8  | DIAPH1      | 9.17E-12 | 0.000374383 | 1.48E-08 | 3.09E-08 | 1        | 4.98E-05    |
| phe.Fasting_rs73864726 | S8 | NEK1 | rs149553852 | S21 | "PCDHGA10,I | 2.15E-05 | 1.00E+00    | 8.87E-03 | 3.33E-07 | 1        | 4.16E-04    |
| phe.Fasting_rs73864726 | S8 | NEK1 | rs149716949 | S5  | DIAPH1      | 7.67E-13 | 3.13E-05    | 1.59E-09 | 3.86E-09 | 0.15716  | 7.94E-06    |
| phe.Fasting_rs73864726 | S8 | NEK1 | rs149791570 | S5  | DIAPH1      | 1.65E-12 | 6.74E-05    | 3.16E-09 | 4.45E-09 | 0.180939 | 9.00E-06    |
| phe.Fasting_rs73864726 | S8 | NEK1 | rs150117838 | S8  | KPNA3       | 3.50E-16 | 1.43E-08    | 1.15E-12 | 3.00E-07 | 1        | 0.000378616 |
| phe.Fasting_rs73864726 | S8 | NEK1 | rs150452206 | S13 | "DIAPH1,LOC | 9.17E-12 | 0.000374383 | 1.48E-08 | 3.09E-08 | 1        | 4.98E-05    |
| phe.Fasting_rs73864726 | S8 | NEK1 | rs150675915 | S7  | DIAPH1      | 9.17E-12 | 0.000374383 | 1.48E-08 | 3.09E-08 | 1        | 4.98E-05    |

|                        |    |      |             |     |             |          |             |          |          |             |             |
|------------------------|----|------|-------------|-----|-------------|----------|-------------|----------|----------|-------------|-------------|
| phe.Fasting_rs73864726 | S8 | NEK1 | rs150765570 | S7  | DIAPH1      | 9.17E-12 | 3.74E-04    | 1.48E-08 | 3.09E-08 | 1           | 4.98E-05    |
| phe.Fasting_rs73864726 | S8 | NEK1 | rs150992994 | S11 | "PCDHGA5,PI | 9.47E-12 | 3.87E-04    | 1.52E-08 | 2.95E-08 | 1           | 4.80E-05    |
| phe.Fasting_rs73864726 | S8 | NEK1 | rs151204700 | S8  | DIAPH1      | 9.17E-12 | 3.74E-04    | 1.48E-08 | 3.09E-08 | 1           | 4.98E-05    |
| phe.Fasting_rs73864726 | S8 | NEK1 | rs151330468 | S8  | DIAPH1      | 1.65E-12 | 6.74E-05    | 3.16E-09 | 6.99E-09 | 0.284722    | 1.35E-05    |
| phe.Fasting_rs73864726 | S8 | NEK1 | rs16894241  | S4  | HIST1H2BK   | 5.24E-08 | 1.00E+00    | 4.28E-05 | 6.75E-07 | 1           | 0.000789743 |
| phe.Fasting_rs73864726 | S8 | NEK1 | rs180772028 | S8  | "DIAPH1,LOC | 9.17E-12 | 3.74E-04    | 1.48E-08 | 3.09E-08 | 1           | 4.98E-05    |
| phe.Fasting_rs73864726 | S8 | NEK1 | rs181224861 | S7  | DIAPH1      | 9.17E-12 | 3.74E-04    | 1.48E-08 | 3.09E-08 | 1           | 4.98E-05    |
| phe.Fasting_rs73864726 | S8 | NEK1 | rs181247960 | S21 | "PCDHGA9,PI | 2.15E-05 | 1.00E+00    | 8.87E-03 | 3.33E-07 | 1           | 0.000415605 |
| phe.Fasting_rs73864726 | S8 | NEK1 | rs181824655 | S21 | "PCDHGB6,PI | 2.15E-05 | 1.00E+00    | 8.87E-03 | 3.33E-07 | 1           | 0.000415605 |
| phe.Fasting_rs73864726 | S8 | NEK1 | rs182714699 | S8  | DIAPH1      | 9.17E-12 | 3.74E-04    | 1.48E-08 | 3.09E-08 | 1           | 4.98E-05    |
| phe.Fasting_rs73864726 | S8 | NEK1 | rs182965141 | S8  | DIAPH1      | 2.01E-12 | 8.19E-05    | 3.80E-09 | 2.45E-09 | 0.0995578   | 5.28E-06    |
| phe.Fasting_rs73864726 | S8 | NEK1 | rs183597049 | S7  | DIAPH1      | 9.17E-12 | 0.000374383 | 1.48E-08 | 3.09E-08 | 1           | 4.98E-05    |
| phe.Fasting_rs73864726 | S8 | NEK1 | rs183980988 | S2  | NA          | 9.17E-12 | 0.000374383 | 1.48E-08 | 3.09E-08 | 1           | 4.98E-05    |
| phe.Fasting_rs73864726 | S8 | NEK1 | rs184233232 | S7  | DIAPH1      | 9.17E-12 | 0.000374383 | 1.48E-08 | 3.09E-08 | 1           | 4.98E-05    |
| phe.Fasting_rs73864726 | S8 | NEK1 | rs184509477 | S13 | "PCDHGB4,PI | 9.17E-12 | 0.000374383 | 1.48E-08 | 3.09E-08 | 1           | 4.98E-05    |
| phe.Fasting_rs73864726 | S8 | NEK1 | rs185069296 | S15 | "LOC1005056 | 9.17E-12 | 0.000374383 | 1.48E-08 | 3.09E-08 | 1           | 4.98E-05    |
| phe.Fasting_rs73864726 | S8 | NEK1 | rs185502834 | S8  | DIAPH1      | 1.65E-12 | 6.74E-05    | 3.16E-09 | 4.45E-09 | 0.180939    | 9.00E-06    |
| phe.Fasting_rs73864726 | S8 | NEK1 | rs185759881 | S7  | DIAPH1      | 9.17E-12 | 3.74E-04    | 1.48E-08 | 3.09E-08 | 1           | 4.98E-05    |
| phe.Fasting_rs73864726 | S8 | NEK1 | rs186288044 | S21 | "PCDHGB4,PI | 2.15E-05 | 1           | 8.87E-03 | 3.33E-07 | 1           | 0.000415605 |
| phe.Fasting_rs73864726 | S8 | NEK1 | rs187000011 | S11 | DIAPH1      | 9.17E-12 | 0.000374383 | 1.48E-08 | 3.09E-08 | 1           | 4.98E-05    |
| phe.Fasting_rs73864726 | S8 | NEK1 | rs188981295 | S5  | "RPS27AP10, | 9.17E-12 | 0.000374383 | 1.48E-08 | 3.09E-08 | 1           | 4.98E-05    |
| phe.Fasting_rs73864726 | S8 | NEK1 | rs190559574 | S7  | DIAPH1      | 1.65E-12 | 6.74E-05    | 3.16E-09 | 4.45E-09 | 0.180939    | 9.00E-06    |
| phe.Fasting_rs73864726 | S8 | NEK1 | rs191544043 | S8  | DIAPH1      | 9.17E-12 | 3.74E-04    | 1.48E-08 | 3.09E-08 | 1           | 4.98E-05    |
| phe.Fasting_rs73864726 | S8 | NEK1 | rs191766712 | S7  | DIAPH1      | 9.17E-12 | 3.74E-04    | 1.48E-08 | 3.09E-08 | 1           | 4.98E-05    |
| phe.Fasting_rs73864726 | S8 | NEK1 | rs192690040 | S7  | DIAPH1      | 9.17E-12 | 0.000374383 | 1.48E-08 | 3.09E-08 | 1           | 4.98E-05    |
| phe.Fasting_rs73864726 | S8 | NEK1 | rs192765219 | S7  | DIAPH1      | 9.17E-12 | 3.74E-04    | 1.48E-08 | 3.09E-08 | 1           | 4.98E-05    |
| phe.Fasting_rs73864726 | S8 | NEK1 | rs192770525 | S7  | DIAPH1      | 9.17E-12 | 3.74E-04    | 1.48E-08 | 3.09E-08 | 1           | 4.98E-05    |
| phe.Fasting_rs73864726 | S8 | NEK1 | rs2924507   | S5  | ZC3H3       | 3.60E-08 | 1.00E+00    | 3.04E-05 | 1.27E-06 | 1           | 0.00139597  |
| phe.Fasting_rs73864726 | S8 | NEK1 | rs2924508   | S8  | ZC3H3       | 3.60E-08 | 1.00E+00    | 3.04E-05 | 1.77E-06 | 1           | 0.00186217  |
| phe.Fasting_rs73864726 | S8 | NEK1 | rs2924511   | S7  | ZC3H3       | 3.60E-08 | 1.00E+00    | 3.04E-05 | 1.08E-06 | 1           | 0.00121176  |
| phe.Fasting_rs73864726 | S8 | NEK1 | rs2924512   | S7  | ZC3H3       | 4.02E-08 | 1.00E+00    | 3.37E-05 | 1.35E-06 | 1           | 0.00147188  |
| phe.Fasting_rs73864726 | S8 | NEK1 | rs2956376   | S8  | ZC3H3       | 3.60E-08 | 1           | 3.04E-05 | 7.36E-07 | 1           | 0.000853057 |
| phe.Fasting_rs73864726 | S8 | NEK1 | rs2980270   | S7  | ZC3H3       | 3.60E-08 | 1           | 3.04E-05 | 7.36E-07 | 1           | 8.53E-04    |
| phe.Fasting_rs73864726 | S8 | NEK1 | rs2980272   | S7  | ZC3H3       | 4.02E-08 | 1.00E+00    | 3.37E-05 | 1.41E-06 | 1           | 0.00153088  |
| phe.Fasting_rs73864726 | S8 | NEK1 | rs2980275   | S5  | ZC3H3       | 3.60E-08 | 1.00E+00    | 3.04E-05 | 1.27E-06 | 1           | 0.00139597  |
| phe.Fasting_rs73864726 | S8 | NEK1 | rs35990401  | S7  | DIAPH1      | 8.40E-12 | 3.43E-04    | 1.39E-08 | 1.16E-08 | 0.474122    | 2.13E-05    |
| phe.Fasting_rs73864726 | S8 | NEK1 | rs366767    | S5  | ZC3H3       | 6.34E-08 | 1           | 5.08E-05 | 7.89E-07 | 1           | 0.000909793 |
| phe.Fasting_rs73864726 | S8 | NEK1 | rs55900860  | S7  | DIAPH1      | 1.65E-12 | 6.74E-05    | 3.16E-09 | 4.45E-09 | 0.180939    | 9.00E-06    |
| phe.Fasting_rs73864726 | S8 | NEK1 | rs6881310   | S23 | ISL1        | 4.23E-17 | 1.73E-09    | 2.22E-13 | 3.40E-12 | 0.000138444 | 1.43E-08    |
| phe.Fasting_rs73864726 | S8 | NEK1 | rs73619637  | S8  | NA          | 1.02E-16 | 4.15E-09    | 4.31E-13 | 1.80E-08 | 0.733806    | 3.14E-05    |

|                        |    |      |             |     |             |          |             |          |          |           |             |
|------------------------|----|------|-------------|-----|-------------|----------|-------------|----------|----------|-----------|-------------|
| phe.Fasting_rs73864726 | S8 | NEK1 | rs77444916  | S23 | LOC642366   | 1.50E-17 | 6.11E-10    | 1.18E-13 | 1.19E-15 | 4.84E-08  | 1.36E-11    |
| phe.Fasting_rs73864726 | S8 | NEK1 | rs77798597  | S7  | KPNA3       | 3.50E-16 | 1.43E-08    | 1.15E-12 | 3.00E-07 | 1         | 0.000378616 |
| phe.Fasting_rs73864726 | S8 | NEK1 | rs78703708  | S7  | FAF2        | 9.25E-18 | 3.78E-10    | 9.24E-14 | 4.64E-07 | 1         | 0.000558314 |
| phe.Fasting_rs73864726 | S8 | NEK1 | rs78736524  | S5  | KPNA3       | 3.50E-16 | 1.43E-08    | 1.15E-12 | 3.13E-07 | 1         | 0.000393894 |
| phe.Fasting_rs73864726 | S8 | NEK1 | rs79517926  | S15 | "DIAPH1,LOC | 2.69E-12 | 0.000109672 | 4.97E-09 | 3.36E-09 | 0.136596  | 7.04E-06    |
| phe.Fasting_rs73864726 | S8 | NEK1 | rs79781495  | S8  | KPNA3       | 3.50E-16 | 1.43E-08    | 1.15E-12 | 3.00E-07 | 1         | 0.000378616 |
| phe.Fasting_rs73864726 | S8 | NEK1 | rs80258830  | S24 | LOC642366   | 1.50E-17 | 6.11E-10    | 1.18E-13 | 1.19E-15 | 4.84E-08  | 1.36E-11    |
| phe.Fasting_rs73864726 | S8 | NEK1 | rs80332465  | S5  | KPNA3       | 3.75E-16 | 1.53E-08    | 1.22E-12 | 3.13E-07 | 1         | 0.000393227 |
| phe.Fasting_rs73864726 | S8 | NEK1 | rs80334773  | S5  | KPNA3       | 3.75E-16 | 1.53E-08    | 1.22E-12 | 3.13E-07 | 1         | 0.000393227 |
| phe.Fasting_rs73864731 | S5 | NEK1 | rs112027720 | S7  | DIAPH1      | 1.77E-11 | 0.000720986 | 2.67E-08 | 3.09E-08 | 1         | 4.98E-05    |
| phe.Fasting_rs73864731 | S5 | NEK1 | rs112089881 | S8  | ZFAND4      | 3.81E-18 | 1.56E-10    | 5.82E-14 | 7.39E-09 | 0.300904  | 1.42E-05    |
| phe.Fasting_rs73864731 | S5 | NEK1 | rs113219478 | S7  | DIAPH1      | 1.77E-11 | 0.000720986 | 2.67E-08 | 3.09E-08 | 1         | 4.98E-05    |
| phe.Fasting_rs73864731 | S5 | NEK1 | rs113357907 | S24 | ISL1        | 1.21E-17 | 4.92E-10    | 1.05E-13 | 1.27E-15 | 5.16E-08  | 1.44E-11    |
| phe.Fasting_rs73864731 | S5 | NEK1 | rs115787552 | S5  | KPNA3       | 6.84E-16 | 2.79E-08    | 2.09E-12 | 3.13E-07 | 1         | 0.000393894 |
| phe.Fasting_rs73864731 | S5 | NEK1 | rs115888477 | S8  | NA          | 5.15E-15 | 2.10E-07    | 1.34E-11 | 2.44E-08 | 0.994402  | 4.03E-05    |
| phe.Fasting_rs73864731 | S5 | NEK1 | rs116011837 | S9  | BRD2        | 4.72E-17 | 1.93E-09    | 2.38E-13 | 3.18E-10 | 0.0129556 | 8.55E-07    |
| phe.Fasting_rs73864731 | S5 | NEK1 | rs116079984 | S8  | KPNA3       | 6.84E-16 | 2.79E-08    | 2.09E-12 | 3.67E-07 | 1         | 0.000454306 |
| phe.Fasting_rs73864731 | S5 | NEK1 | rs116120727 | S9  | BRD2        | 4.72E-17 | 1.93E-09    | 2.38E-13 | 3.18E-10 | 0.0129556 | 8.55E-07    |
| phe.Fasting_rs73864731 | S5 | NEK1 | rs138090701 | S5  | HDAC3       | 2.10E-12 | 8.59E-05    | 3.96E-09 | 1.93E-08 | 0.787129  | 3.33E-05    |
| phe.Fasting_rs73864731 | S5 | NEK1 | rs138136869 | S7  | DIAPH1      | 3.40E-12 | 1.39E-04    | 6.17E-09 | 4.45E-09 | 0.180939  | 9.00E-06    |
| phe.Fasting_rs73864731 | S5 | NEK1 | rs138457103 | S10 | DIAPH1      | 1.08E-11 | 4.40E-04    | 1.70E-08 | 2.89E-08 | 1         | 4.72E-05    |
| phe.Fasting_rs73864731 | S5 | NEK1 | rs138487229 | S11 | DIAPH1      | 1.77E-11 | 7.21E-04    | 2.67E-08 | 3.09E-08 | 1         | 4.98E-05    |
| phe.Fasting_rs73864731 | S5 | NEK1 | rs138738950 | S8  | "PCDHGB2,PI | 1.77E-11 | 7.21E-04    | 2.67E-08 | 3.08E-08 | 1         | 4.98E-05    |
| phe.Fasting_rs73864731 | S5 | NEK1 | rs139297927 | S8  | DIAPH1      | 1.77E-11 | 7.21E-04    | 2.67E-08 | 3.09E-08 | 1         | 4.98E-05    |
| phe.Fasting_rs73864731 | S5 | NEK1 | rs139337303 | S8  | DIAPH1      | 1.77E-11 | 0.000720986 | 2.67E-08 | 3.09E-08 | 1         | 4.98E-05    |
| phe.Fasting_rs73864731 | S5 | NEK1 | rs139403963 | S8  | DIAPH1      | 3.40E-12 | 0.000138726 | 6.17E-09 | 4.45E-09 | 0.180939  | 9.00E-06    |
| phe.Fasting_rs73864731 | S5 | NEK1 | rs139621309 | S18 | "LOC100505( | 1.77E-11 | 0.000720986 | 2.67E-08 | 3.09E-08 | 1         | 4.98E-05    |
| phe.Fasting_rs73864731 | S5 | NEK1 | rs139828110 | S8  | DIAPH1      | 3.40E-12 | 0.000138726 | 6.17E-09 | 4.45E-09 | 0.180939  | 9.00E-06    |
| phe.Fasting_rs73864731 | S5 | NEK1 | rs140070363 | S8  | DIAPH1      | 1.77E-11 | 7.21E-04    | 2.67E-08 | 3.09E-08 | 1         | 4.98E-05    |
| phe.Fasting_rs73864731 | S5 | NEK1 | rs140644750 | S13 | DIAPH1      | 1.77E-11 | 7.21E-04    | 2.67E-08 | 3.09E-08 | 1         | 4.98E-05    |
| phe.Fasting_rs73864731 | S5 | NEK1 | rs141022544 | S8  | DIAPH1      | 1.77E-11 | 7.21E-04    | 2.67E-08 | 3.09E-08 | 1         | 4.98E-05    |
| phe.Fasting_rs73864731 | S5 | NEK1 | rs141525984 | S5  | DIAPH1      | 1.77E-11 | 0.000720986 | 2.67E-08 | 3.09E-08 | 1         | 4.98E-05    |
| phe.Fasting_rs73864731 | S5 | NEK1 | rs141926074 | S8  | ATE1        | 2.53E-06 | 1.00E+00    | 1.37E-03 | 2.84E-14 | 1.16E-06  | 2.14E-10    |
| phe.Fasting_rs73864731 | S5 | NEK1 | rs142480565 | S8  | DIAPH1      | 1.77E-11 | 7.21E-04    | 2.67E-08 | 3.09E-08 | 1         | 4.98E-05    |
| phe.Fasting_rs73864731 | S5 | NEK1 | rs142718558 | S7  | "DIAPH1,LOC | 1.77E-11 | 7.21E-04    | 2.67E-08 | 3.09E-08 | 1         | 4.98E-05    |
| phe.Fasting_rs73864731 | S5 | NEK1 | rs142789100 | S8  | DIAPH1      | 3.40E-12 | 1.39E-04    | 6.17E-09 | 4.45E-09 | 0.180939  | 9.00E-06    |
| phe.Fasting_rs73864731 | S5 | NEK1 | rs142812798 | S7  | DIAPH1      | 3.40E-12 | 1.39E-04    | 6.17E-09 | 4.45E-09 | 0.180939  | 9.00E-06    |
| phe.Fasting_rs73864731 | S5 | NEK1 | rs143377827 | S13 | "DIAPH1,LOC | 2.95E-12 | 1.21E-04    | 5.42E-09 | 3.66E-09 | 0.14914   | 7.58E-06    |
| phe.Fasting_rs73864731 | S5 | NEK1 | rs143691978 | S11 | DIAPH1      | 3.40E-12 | 1.39E-04    | 6.17E-09 | 6.99E-09 | 0.284722  | 1.35E-05    |
| phe.Fasting_rs73864731 | S5 | NEK1 | rs144081334 | S11 | DIAPH1      | 3.40E-12 | 0.000138726 | 6.17E-09 | 6.99E-09 | 0.284722  | 1.35E-05    |

|                        |    |      |             |     |             |          |             |          |          |           |             |
|------------------------|----|------|-------------|-----|-------------|----------|-------------|----------|----------|-----------|-------------|
| phe.Fasting_rs73864731 | S5 | NEK1 | rs144613910 | S8  | DIAPH1      | 1.77E-11 | 0.000720986 | 2.67E-08 | 3.09E-08 | 1         | 4.98E-05    |
| phe.Fasting_rs73864731 | S5 | NEK1 | rs145027704 | S11 | DIAPH1      | 3.40E-12 | 0.000138726 | 6.17E-09 | 6.99E-09 | 0.284722  | 1.35E-05    |
| phe.Fasting_rs73864731 | S5 | NEK1 | rs146220673 | S7  | DIAPH1      | 1.77E-11 | 0.000720986 | 2.67E-08 | 3.09E-08 | 1         | 4.98E-05    |
| phe.Fasting_rs73864731 | S5 | NEK1 | rs146622060 | S13 | DIAPH1      | 3.40E-12 | 0.000138726 | 6.17E-09 | 6.99E-09 | 0.284722  | 1.35E-05    |
| phe.Fasting_rs73864731 | S5 | NEK1 | rs146815317 | S5  | KPNA3       | 6.84E-16 | 2.79E-08    | 2.09E-12 | 3.13E-07 | 1         | 0.000393894 |
| phe.Fasting_rs73864731 | S5 | NEK1 | rs146878162 | S7  | DIAPH1      | 1.77E-11 | 7.21E-04    | 2.67E-08 | 3.09E-08 | 1         | 4.98E-05    |
| phe.Fasting_rs73864731 | S5 | NEK1 | rs1470889   | S5  | ZC3H3       | 4.57E-14 | 1.87E-06    | 1.09E-10 | 1.27E-06 | 1         | 0.00139597  |
| phe.Fasting_rs73864731 | S5 | NEK1 | rs1470890   | S5  | ZC3H3       | 4.57E-14 | 1.87E-06    | 1.09E-10 | 1.27E-06 | 1         | 0.00139597  |
| phe.Fasting_rs73864731 | S5 | NEK1 | rs147314451 | S8  | DIAPH1      | 1.77E-11 | 0.000720986 | 2.67E-08 | 3.09E-08 | 1         | 4.98E-05    |
| phe.Fasting_rs73864731 | S5 | NEK1 | rs147417996 | S7  | DIAPH1      | 3.40E-12 | 0.000138726 | 6.17E-09 | 6.99E-09 | 0.284722  | 1.35E-05    |
| phe.Fasting_rs73864731 | S5 | NEK1 | rs147646948 | S7  | "LOC1005056 | 1.77E-11 | 7.21E-04    | 2.67E-08 | 3.09E-08 | 1         | 4.98E-05    |
| phe.Fasting_rs73864731 | S5 | NEK1 | rs147677041 | S8  | DIAPH1      | 3.40E-12 | 1.39E-04    | 6.17E-09 | 4.45E-09 | 0.180939  | 9.00E-06    |
| phe.Fasting_rs73864731 | S5 | NEK1 | rs148116628 | S7  | DIAPH1      | 1.77E-11 | 0.000720986 | 2.67E-08 | 3.09E-08 | 1         | 4.98E-05    |
| phe.Fasting_rs73864731 | S5 | NEK1 | rs148423011 | S7  | DIAPH1      | 1.77E-11 | 7.21E-04    | 2.67E-08 | 3.09E-08 | 1         | 4.98E-05    |
| phe.Fasting_rs73864731 | S5 | NEK1 | rs149019627 | S8  | DIAPH1      | 3.40E-12 | 1.39E-04    | 6.17E-09 | 4.45E-09 | 0.180939  | 9.00E-06    |
| phe.Fasting_rs73864731 | S5 | NEK1 | rs149075406 | S8  | DIAPH1      | 1.77E-11 | 7.21E-04    | 2.67E-08 | 3.09E-08 | 1         | 4.98E-05    |
| phe.Fasting_rs73864731 | S5 | NEK1 | rs149334783 | S8  | DIAPH1      | 1.77E-11 | 7.21E-04    | 2.67E-08 | 3.09E-08 | 1         | 4.98E-05    |
| phe.Fasting_rs73864731 | S5 | NEK1 | rs149716949 | S5  | DIAPH1      | 1.61E-12 | 6.59E-05    | 3.13E-09 | 3.86E-09 | 0.15716   | 7.94E-06    |
| phe.Fasting_rs73864731 | S5 | NEK1 | rs149791570 | S5  | DIAPH1      | 3.40E-12 | 1.39E-04    | 6.17E-09 | 4.45E-09 | 0.180939  | 9.00E-06    |
| phe.Fasting_rs73864731 | S5 | NEK1 | rs150117838 | S8  | KPNA3       | 6.84E-16 | 2.79E-08    | 2.09E-12 | 3.00E-07 | 1         | 0.000378616 |
| phe.Fasting_rs73864731 | S5 | NEK1 | rs150452206 | S13 | "DIAPH1,LOC | 1.77E-11 | 7.21E-04    | 2.67E-08 | 3.09E-08 | 1         | 4.98E-05    |
| phe.Fasting_rs73864731 | S5 | NEK1 | rs150675915 | S7  | DIAPH1      | 1.77E-11 | 7.21E-04    | 2.67E-08 | 3.09E-08 | 1         | 4.98E-05    |
| phe.Fasting_rs73864731 | S5 | NEK1 | rs150765570 | S7  | DIAPH1      | 1.77E-11 | 7.21E-04    | 2.67E-08 | 3.09E-08 | 1         | 4.98E-05    |
| phe.Fasting_rs73864731 | S5 | NEK1 | rs150992994 | S11 | "PCDHGAS,PI | 1.84E-11 | 7.50E-04    | 2.76E-08 | 2.95E-08 | 1         | 4.80E-05    |
| phe.Fasting_rs73864731 | S5 | NEK1 | rs151204700 | S8  | DIAPH1      | 1.77E-11 | 7.21E-04    | 2.67E-08 | 3.09E-08 | 1         | 4.98E-05    |
| phe.Fasting_rs73864731 | S5 | NEK1 | rs151330468 | S8  | DIAPH1      | 3.40E-12 | 1.39E-04    | 6.17E-09 | 6.99E-09 | 0.284722  | 1.35E-05    |
| phe.Fasting_rs73864731 | S5 | NEK1 | rs16894241  | S4  | HIST1H2BK   | 1.09E-07 | 1.00E+00    | 8.26E-05 | 6.75E-07 | 1         | 0.000789743 |
| phe.Fasting_rs73864731 | S5 | NEK1 | rs180772028 | S8  | "DIAPH1,LOC | 1.77E-11 | 7.21E-04    | 2.67E-08 | 3.09E-08 | 1         | 4.98E-05    |
| phe.Fasting_rs73864731 | S5 | NEK1 | rs181224861 | S7  | DIAPH1      | 1.77E-11 | 7.21E-04    | 2.67E-08 | 3.09E-08 | 1         | 4.98E-05    |
| phe.Fasting_rs73864731 | S5 | NEK1 | rs182714699 | S8  | DIAPH1      | 1.77E-11 | 7.21E-04    | 2.67E-08 | 3.09E-08 | 1         | 4.98E-05    |
| phe.Fasting_rs73864731 | S5 | NEK1 | rs182965141 | S8  | DIAPH1      | 4.12E-12 | 1.68E-04    | 7.40E-09 | 2.45E-09 | 0.0995578 | 5.28E-06    |
| phe.Fasting_rs73864731 | S5 | NEK1 | rs183597049 | S7  | DIAPH1      | 1.77E-11 | 0.000720986 | 2.67E-08 | 3.09E-08 | 1         | 4.98E-05    |
| phe.Fasting_rs73864731 | S5 | NEK1 | rs183980988 | S2  | NA          | 1.77E-11 | 7.21E-04    | 2.67E-08 | 3.09E-08 | 1         | 4.98E-05    |
| phe.Fasting_rs73864731 | S5 | NEK1 | rs184233232 | S7  | DIAPH1      | 1.77E-11 | 7.21E-04    | 2.67E-08 | 3.09E-08 | 1         | 4.98E-05    |
| phe.Fasting_rs73864731 | S5 | NEK1 | rs184509477 | S13 | "PCDHGB4,PI | 1.77E-11 | 7.21E-04    | 2.67E-08 | 3.09E-08 | 1         | 4.98E-05    |
| phe.Fasting_rs73864731 | S5 | NEK1 | rs185069296 | S15 | "LOC1005056 | 1.77E-11 | 7.21E-04    | 2.67E-08 | 3.09E-08 | 1         | 4.98E-05    |
| phe.Fasting_rs73864731 | S5 | NEK1 | rs185502834 | S8  | DIAPH1      | 3.40E-12 | 1.39E-04    | 6.17E-09 | 4.45E-09 | 0.180939  | 9.00E-06    |
| phe.Fasting_rs73864731 | S5 | NEK1 | rs185759881 | S7  | DIAPH1      | 1.77E-11 | 7.21E-04    | 2.67E-08 | 3.09E-08 | 1         | 4.98E-05    |
| phe.Fasting_rs73864731 | S5 | NEK1 | rs187000011 | S11 | DIAPH1      | 1.77E-11 | 0.000720986 | 2.67E-08 | 3.09E-08 | 1         | 4.98E-05    |
| phe.Fasting_rs73864731 | S5 | NEK1 | rs188981295 | S5  | "RP527AP10, | 1.77E-11 | 0.000720986 | 2.67E-08 | 3.09E-08 | 1         | 4.98E-05    |

|                        |    |      |             |     |             |          |             |          |          |             |             |
|------------------------|----|------|-------------|-----|-------------|----------|-------------|----------|----------|-------------|-------------|
| phe.Fasting_rs73864731 | S5 | NEK1 | rs190559574 | S7  | DIAPH1      | 3.40E-12 | 0.000138726 | 6.17E-09 | 4.45E-09 | 0.180939    | 9.00E-06    |
| phe.Fasting_rs73864731 | S5 | NEK1 | rs191544043 | S8  | DIAPH1      | 1.77E-11 | 0.000720986 | 2.67E-08 | 3.09E-08 | 1           | 4.98E-05    |
| phe.Fasting_rs73864731 | S5 | NEK1 | rs191766712 | S7  | DIAPH1      | 1.77E-11 | 7.21E-04    | 2.67E-08 | 3.09E-08 | 1           | 4.98E-05    |
| phe.Fasting_rs73864731 | S5 | NEK1 | rs192690040 | S7  | DIAPH1      | 1.77E-11 | 7.21E-04    | 2.67E-08 | 3.09E-08 | 1           | 4.98E-05    |
| phe.Fasting_rs73864731 | S5 | NEK1 | rs192765219 | S7  | DIAPH1      | 1.77E-11 | 7.21E-04    | 2.67E-08 | 3.09E-08 | 1           | 4.98E-05    |
| phe.Fasting_rs73864731 | S5 | NEK1 | rs192770525 | S7  | DIAPH1      | 1.77E-11 | 7.21E-04    | 2.67E-08 | 3.09E-08 | 1           | 4.98E-05    |
| phe.Fasting_rs73864731 | S5 | NEK1 | rs2924507   | S5  | ZC3H3       | 4.57E-14 | 1.87E-06    | 1.09E-10 | 1.27E-06 | 1           | 0.00139597  |
| phe.Fasting_rs73864731 | S5 | NEK1 | rs2924508   | S8  | ZC3H3       | 4.57E-14 | 1.87E-06    | 1.09E-10 | 1.77E-06 | 1           | 0.00186217  |
| phe.Fasting_rs73864731 | S5 | NEK1 | rs2924511   | S7  | ZC3H3       | 4.57E-14 | 1.87E-06    | 1.09E-10 | 1.08E-06 | 1           | 0.00121176  |
| phe.Fasting_rs73864731 | S5 | NEK1 | rs2924512   | S7  | ZC3H3       | 5.29E-14 | 2.16E-06    | 1.24E-10 | 1.35E-06 | 1           | 0.00147188  |
| phe.Fasting_rs73864731 | S5 | NEK1 | rs2956376   | S8  | ZC3H3       | 4.57E-14 | 1.87E-06    | 1.09E-10 | 7.36E-07 | 1           | 0.000853057 |
| phe.Fasting_rs73864731 | S5 | NEK1 | rs2980270   | S7  | ZC3H3       | 4.57E-14 | 1.87E-06    | 1.09E-10 | 7.36E-07 | 1           | 0.000853057 |
| phe.Fasting_rs73864731 | S5 | NEK1 | rs2980272   | S7  | ZC3H3       | 5.29E-14 | 2.16E-06    | 1.24E-10 | 1.41E-06 | 1           | 0.00153088  |
| phe.Fasting_rs73864731 | S5 | NEK1 | rs2980275   | S5  | ZC3H3       | 4.57E-14 | 1.87E-06    | 1.09E-10 | 1.27E-06 | 1           | 0.00139597  |
| phe.Fasting_rs73864731 | S5 | NEK1 | rs35990401  | S7  | DIAPH1      | 1.65E-11 | 0.000673132 | 2.51E-08 | 1.16E-08 | 0.474122    | 2.13E-05    |
| phe.Fasting_rs73864731 | S5 | NEK1 | rs366767    | S5  | ZC3H3       | 8.06E-14 | 3.29E-06    | 1.85E-10 | 7.89E-07 | 1           | 0.000909793 |
| phe.Fasting_rs73864731 | S5 | NEK1 | rs55900860  | S7  | DIAPH1      | 3.40E-12 | 0.000138726 | 6.17E-09 | 4.45E-09 | 0.180939    | 9.00E-06    |
| phe.Fasting_rs73864731 | S5 | NEK1 | rs6881310   | S23 | ISL1        | 8.19E-17 | 3.35E-09    | 3.59E-13 | 3.40E-12 | 0.000138444 | 1.43E-08    |
| phe.Fasting_rs73864731 | S5 | NEK1 | rs73619637  | S8  | NA          | 1.99E-16 | 8.13E-09    | 6.94E-13 | 1.80E-08 | 0.733806    | 3.14E-05    |
| phe.Fasting_rs73864731 | S5 | NEK1 | rs77444916  | S23 | LOC642366   | 2.90E-17 | 1.18E-09    | 1.66E-13 | 1.19E-15 | 4.84E-08    | 1.36E-11    |
| phe.Fasting_rs73864731 | S5 | NEK1 | rs77798597  | S7  | KPNA3       | 6.84E-16 | 2.79E-08    | 2.09E-12 | 3.00E-07 | 1           | 0.000378616 |
| phe.Fasting_rs73864731 | S5 | NEK1 | rs78703708  | S7  | FAF2        | 1.94E-17 | 7.93E-10    | 1.40E-13 | 4.64E-07 | 1           | 0.000558314 |
| phe.Fasting_rs73864731 | S5 | NEK1 | rs78736524  | S5  | KPNA3       | 6.84E-16 | 2.79E-08    | 2.09E-12 | 3.13E-07 | 1           | 0.000393894 |
| phe.Fasting_rs73864731 | S5 | NEK1 | rs79517926  | S15 | "DIAPH1,LOC | 5.55E-12 | 0.000226692 | 9.79E-09 | 3.36E-09 | 0.136596    | 7.04E-06    |
| phe.Fasting_rs73864731 | S5 | NEK1 | rs79781495  | S8  | KPNA3       | 6.84E-16 | 2.79E-08    | 2.09E-12 | 3.00E-07 | 1           | 0.000378616 |
| phe.Fasting_rs73864731 | S5 | NEK1 | rs80258830  | S24 | LOC642366   | 2.90E-17 | 1.18E-09    | 1.66E-13 | 1.19E-15 | 4.84E-08    | 1.36E-11    |
| phe.Fasting_rs73864731 | S5 | NEK1 | rs80332465  | S5  | KPNA3       | 7.33E-16 | 2.99E-08    | 2.24E-12 | 3.13E-07 | 1           | 0.000393227 |
| phe.Fasting_rs73864731 | S5 | NEK1 | rs80334773  | S5  | KPNA3       | 7.33E-16 | 2.99E-08    | 2.24E-12 | 3.13E-07 | 1           | 0.000393227 |
| phe.Fasting_rs73864732 | S8 | NEK1 | rs112027720 | S7  | DIAPH1      | 1.89E-11 | 0.000772619 | 2.83E-08 | 3.12E-08 | 1           | 5.00E-05    |
| phe.Fasting_rs73864732 | S8 | NEK1 | rs112089881 | S8  | ZFAND4      | 4.28E-18 | 1.75E-10    | 6.33E-14 | 7.07E-09 | 0.287901    | 1.36E-05    |
| phe.Fasting_rs73864732 | S8 | NEK1 | rs113219478 | S7  | DIAPH1      | 1.89E-11 | 7.73E-04    | 2.83E-08 | 3.12E-08 | 1           | 5.00E-05    |
| phe.Fasting_rs73864732 | S8 | NEK1 | rs113357907 | S24 | ISL1        | 1.35E-17 | 5.51E-10    | 1.11E-13 | 1.21E-15 | 4.92E-08    | 1.38E-11    |
| phe.Fasting_rs73864732 | S8 | NEK1 | rs115787552 | S5  | KPNA3       | 7.55E-16 | 3.08E-08    | 2.30E-12 | 2.99E-07 | 1           | 0.000377369 |
| phe.Fasting_rs73864732 | S8 | NEK1 | rs115888477 | S8  | NA          | 5.66E-15 | 2.31E-07    | 1.47E-11 | 2.31E-08 | 0.940424    | 3.85E-05    |
| phe.Fasting_rs73864732 | S8 | NEK1 | rs116011837 | S9  | BRD2        | 5.27E-17 | 2.15E-09    | 2.57E-13 | 1.69E-10 | 0.00686251  | 4.88E-07    |
| phe.Fasting_rs73864732 | S8 | NEK1 | rs116079984 | S8  | KPNA3       | 7.55E-16 | 3.08E-08    | 2.30E-12 | 3.51E-07 | 1           | 0.000436125 |
| phe.Fasting_rs73864732 | S8 | NEK1 | rs116120727 | S9  | BRD2        | 5.27E-17 | 2.15E-09    | 2.57E-13 | 1.69E-10 | 0.00686251  | 4.88E-07    |
| phe.Fasting_rs73864732 | S8 | NEK1 | rs138090701 | S5  | HDAC3       | 2.27E-12 | 9.27E-05    | 4.24E-09 | 1.87E-08 | 0.760637    | 3.23E-05    |
| phe.Fasting_rs73864732 | S8 | NEK1 | rs138136869 | S7  | DIAPH1      | 3.66E-12 | 0.000149366 | 6.60E-09 | 4.48E-09 | 0.182538    | 9.06E-06    |
| phe.Fasting_rs73864732 | S8 | NEK1 | rs138457103 | S10 | DIAPH1      | 1.16E-11 | 0.000472182 | 1.82E-08 | 2.89E-08 | 1           | 4.71E-05    |

|                        |    |      |             |     |             |          |             |          |          |          |             |
|------------------------|----|------|-------------|-----|-------------|----------|-------------|----------|----------|----------|-------------|
| phe.Fasting_rs73864732 | S8 | NEK1 | rs138487229 | S11 | DIAPH1      | 1.89E-11 | 0.000772619 | 2.83E-08 | 3.12E-08 | 1        | 5.00E-05    |
| phe.Fasting_rs73864732 | S8 | NEK1 | rs138738950 | S8  | "PCDHGB2,PI | 1.89E-11 | 0.000772619 | 2.83E-08 | 3.11E-08 | 1        | 5.00E-05    |
| phe.Fasting_rs73864732 | S8 | NEK1 | rs139297927 | S8  | DIAPH1      | 1.89E-11 | 0.000772619 | 2.83E-08 | 3.12E-08 | 1        | 5.00E-05    |
| phe.Fasting_rs73864732 | S8 | NEK1 | rs139337303 | S8  | DIAPH1      | 1.89E-11 | 0.000772619 | 2.83E-08 | 3.12E-08 | 1        | 5.00E-05    |
| phe.Fasting_rs73864732 | S8 | NEK1 | rs139403963 | S8  | DIAPH1      | 3.66E-12 | 0.000149366 | 6.60E-09 | 4.48E-09 | 0.182538 | 9.06E-06    |
| phe.Fasting_rs73864732 | S8 | NEK1 | rs139621309 | S18 | "LOC1005056 | 1.89E-11 | 0.000772619 | 2.83E-08 | 3.12E-08 | 1        | 5.00E-05    |
| phe.Fasting_rs73864732 | S8 | NEK1 | rs139828110 | S8  | DIAPH1      | 3.66E-12 | 0.000149366 | 6.60E-09 | 4.48E-09 | 0.182538 | 9.06E-06    |
| phe.Fasting_rs73864732 | S8 | NEK1 | rs140070363 | S8  | DIAPH1      | 1.89E-11 | 0.000772619 | 2.83E-08 | 3.12E-08 | 1        | 5.00E-05    |
| phe.Fasting_rs73864732 | S8 | NEK1 | rs140644750 | S13 | DIAPH1      | 1.89E-11 | 0.000772619 | 2.83E-08 | 3.12E-08 | 1        | 5.00E-05    |
| phe.Fasting_rs73864732 | S8 | NEK1 | rs141022544 | S8  | DIAPH1      | 1.89E-11 | 0.000772619 | 2.83E-08 | 3.12E-08 | 1        | 5.00E-05    |
| phe.Fasting_rs73864732 | S8 | NEK1 | rs141525984 | S5  | DIAPH1      | 1.89E-11 | 0.000772619 | 2.83E-08 | 3.12E-08 | 1        | 5.00E-05    |
| phe.Fasting_rs73864732 | S8 | NEK1 | rs141926074 | S8  | ATE1        | 2.61E-06 | 1           | 1.41E-03 | 2.76E-14 | 1.13E-06 | 2.08E-10    |
| phe.Fasting_rs73864732 | S8 | NEK1 | rs142480565 | S8  | DIAPH1      | 1.89E-11 | 0.000772619 | 2.83E-08 | 3.12E-08 | 1        | 5.00E-05    |
| phe.Fasting_rs73864732 | S8 | NEK1 | rs142718558 | S7  | "DIAPH1,LOC | 1.89E-11 | 7.73E-04    | 2.83E-08 | 3.12E-08 | 1        | 5.00E-05    |
| phe.Fasting_rs73864732 | S8 | NEK1 | rs142789100 | S8  | DIAPH1      | 3.66E-12 | 1.49E-04    | 6.60E-09 | 4.48E-09 | 0.182538 | 9.06E-06    |
| phe.Fasting_rs73864732 | S8 | NEK1 | rs142812798 | S7  | DIAPH1      | 3.66E-12 | 1.49E-04    | 6.60E-09 | 4.48E-09 | 0.182538 | 9.06E-06    |
| phe.Fasting_rs73864732 | S8 | NEK1 | rs143377827 | S13 | "DIAPH1,LOC | 3.18E-12 | 1.30E-04    | 5.81E-09 | 3.71E-09 | 0.151122 | 7.67E-06    |
| phe.Fasting_rs73864732 | S8 | NEK1 | rs143691978 | S11 | DIAPH1      | 3.66E-12 | 1.49E-04    | 6.60E-09 | 7.03E-09 | 0.286317 | 1.35E-05    |
| phe.Fasting_rs73864732 | S8 | NEK1 | rs144081334 | S11 | DIAPH1      | 3.66E-12 | 1.49E-04    | 6.60E-09 | 7.03E-09 | 0.286317 | 1.35E-05    |
| phe.Fasting_rs73864732 | S8 | NEK1 | rs144613910 | S8  | DIAPH1      | 1.89E-11 | 0.000772619 | 2.83E-08 | 3.12E-08 | 1        | 5.00E-05    |
| phe.Fasting_rs73864732 | S8 | NEK1 | rs145027704 | S11 | DIAPH1      | 3.66E-12 | 0.000149366 | 6.60E-09 | 7.03E-09 | 0.286317 | 1.35E-05    |
| phe.Fasting_rs73864732 | S8 | NEK1 | rs146220673 | S7  | DIAPH1      | 1.89E-11 | 7.73E-04    | 2.83E-08 | 3.12E-08 | 1        | 5.00E-05    |
| phe.Fasting_rs73864732 | S8 | NEK1 | rs146622060 | S13 | DIAPH1      | 3.66E-12 | 1.49E-04    | 6.60E-09 | 7.03E-09 | 0.286317 | 1.35E-05    |
| phe.Fasting_rs73864732 | S8 | NEK1 | rs146815317 | S5  | KPNA3       | 7.55E-16 | 3.08E-08    | 2.30E-12 | 2.99E-07 | 1        | 3.77E-04    |
| phe.Fasting_rs73864732 | S8 | NEK1 | rs146878162 | S7  | DIAPH1      | 1.89E-11 | 0.000772619 | 2.83E-08 | 3.12E-08 | 1        | 5.00E-05    |
| phe.Fasting_rs73864732 | S8 | NEK1 | rs1470889   | S5  | ZC3H3       | 4.99E-14 | 2.04E-06    | 1.18E-10 | 1.31E-06 | 1        | 0.00143883  |
| phe.Fasting_rs73864732 | S8 | NEK1 | rs1470890   | S5  | ZC3H3       | 4.99E-14 | 2.04E-06    | 1.18E-10 | 1.31E-06 | 1        | 0.00143883  |
| phe.Fasting_rs73864732 | S8 | NEK1 | rs147314451 | S8  | DIAPH1      | 1.89E-11 | 7.73E-04    | 2.83E-08 | 3.12E-08 | 1        | 5.00E-05    |
| phe.Fasting_rs73864732 | S8 | NEK1 | rs147417996 | S7  | DIAPH1      | 3.66E-12 | 1.49E-04    | 6.60E-09 | 7.03E-09 | 0.286317 | 1.35E-05    |
| phe.Fasting_rs73864732 | S8 | NEK1 | rs147646948 | S7  | "LOC1005056 | 1.89E-11 | 7.73E-04    | 2.83E-08 | 3.12E-08 | 1        | 5.00E-05    |
| phe.Fasting_rs73864732 | S8 | NEK1 | rs147677041 | S8  | DIAPH1      | 3.66E-12 | 1.49E-04    | 6.60E-09 | 4.48E-09 | 0.182538 | 9.06E-06    |
| phe.Fasting_rs73864732 | S8 | NEK1 | rs148116628 | S7  | DIAPH1      | 1.89E-11 | 7.73E-04    | 2.83E-08 | 3.12E-08 | 1        | 5.00E-05    |
| phe.Fasting_rs73864732 | S8 | NEK1 | rs148423011 | S7  | DIAPH1      | 1.89E-11 | 0.000772619 | 2.83E-08 | 3.12E-08 | 1        | 5.00E-05    |
| phe.Fasting_rs73864732 | S8 | NEK1 | rs149019627 | S8  | DIAPH1      | 3.66E-12 | 0.000149366 | 6.60E-09 | 4.48E-09 | 0.182538 | 9.06E-06    |
| phe.Fasting_rs73864732 | S8 | NEK1 | rs149075406 | S8  | DIAPH1      | 1.89E-11 | 0.000772619 | 2.83E-08 | 3.12E-08 | 1        | 5.00E-05    |
| phe.Fasting_rs73864732 | S8 | NEK1 | rs149334783 | S8  | DIAPH1      | 1.89E-11 | 0.000772619 | 2.83E-08 | 3.12E-08 | 1        | 5.00E-05    |
| phe.Fasting_rs73864732 | S8 | NEK1 | rs149716949 | S5  | DIAPH1      | 1.74E-12 | 7.11E-05    | 3.33E-09 | 3.84E-09 | 0.15623  | 7.90E-06    |
| phe.Fasting_rs73864732 | S8 | NEK1 | rs149791570 | S5  | DIAPH1      | 3.66E-12 | 0.000149366 | 6.60E-09 | 4.48E-09 | 0.182538 | 9.06E-06    |
| phe.Fasting_rs73864732 | S8 | NEK1 | rs150117838 | S8  | KPNA3       | 7.55E-16 | 3.08E-08    | 2.30E-12 | 2.86E-07 | 1        | 0.000362927 |
| phe.Fasting_rs73864732 | S8 | NEK1 | rs150452206 | S13 | "DIAPH1,LOC | 1.89E-11 | 0.000772619 | 2.83E-08 | 3.12E-08 | 1        | 5.00E-05    |

|                        |    |      |             |     |             |          |             |          |          |             |             |
|------------------------|----|------|-------------|-----|-------------|----------|-------------|----------|----------|-------------|-------------|
| phe.Fasting_rs73864732 | S8 | NEK1 | rs150675915 | S7  | DIAPH1      | 1.89E-11 | 0.000772619 | 2.83E-08 | 3.12E-08 | 1           | 5.00E-05    |
| phe.Fasting_rs73864732 | S8 | NEK1 | rs150765570 | S7  | DIAPH1      | 1.89E-11 | 0.000772619 | 2.83E-08 | 3.12E-08 | 1           | 5.00E-05    |
| phe.Fasting_rs73864732 | S8 | NEK1 | rs150992994 | S11 | "PCDHGAS,PI | 1.97E-11 | 0.000803211 | 2.93E-08 | 2.98E-08 | 1           | 4.84E-05    |
| phe.Fasting_rs73864732 | S8 | NEK1 | rs151204700 | S8  | DIAPH1      | 1.89E-11 | 7.73E-04    | 2.83E-08 | 3.12E-08 | 1           | 5.00E-05    |
| phe.Fasting_rs73864732 | S8 | NEK1 | rs151330468 | S8  | DIAPH1      | 3.66E-12 | 1.49E-04    | 6.60E-09 | 7.03E-09 | 0.286317    | 1.35E-05    |
| phe.Fasting_rs73864732 | S8 | NEK1 | rs16894241  | S4  | HIST1H2BK   | 1.14E-07 | 1           | 8.59E-05 | 6.83E-07 | 1           | 0.000796439 |
| phe.Fasting_rs73864732 | S8 | NEK1 | rs180772028 | S8  | "DIAPH1,LOC | 1.89E-11 | 7.73E-04    | 2.83E-08 | 3.12E-08 | 1           | 5.00E-05    |
| phe.Fasting_rs73864732 | S8 | NEK1 | rs181224861 | S7  | DIAPH1      | 1.89E-11 | 7.73E-04    | 2.83E-08 | 3.12E-08 | 1           | 5.00E-05    |
| phe.Fasting_rs73864732 | S8 | NEK1 | rs182714699 | S8  | DIAPH1      | 1.89E-11 | 7.73E-04    | 2.83E-08 | 3.12E-08 | 1           | 5.00E-05    |
| phe.Fasting_rs73864732 | S8 | NEK1 | rs182965141 | S8  | DIAPH1      | 4.44E-12 | 1.81E-04    | 7.95E-09 | 2.45E-09 | 0.0998086   | 5.29E-06    |
| phe.Fasting_rs73864732 | S8 | NEK1 | rs183597049 | S7  | DIAPH1      | 1.89E-11 | 7.73E-04    | 2.83E-08 | 3.12E-08 | 1           | 5.00E-05    |
| phe.Fasting_rs73864732 | S8 | NEK1 | rs183980988 | S2  | NA          | 1.89E-11 | 7.73E-04    | 2.83E-08 | 3.12E-08 | 1           | 5.00E-05    |
| phe.Fasting_rs73864732 | S8 | NEK1 | rs184233232 | S7  | DIAPH1      | 1.89E-11 | 0.000772619 | 2.83E-08 | 3.12E-08 | 1           | 5.00E-05    |
| phe.Fasting_rs73864732 | S8 | NEK1 | rs184509477 | S13 | "PCDHGB4,PI | 1.89E-11 | 7.73E-04    | 2.83E-08 | 3.12E-08 | 1           | 5.00E-05    |
| phe.Fasting_rs73864732 | S8 | NEK1 | rs185069296 | S15 | "LOC1005056 | 1.89E-11 | 7.73E-04    | 2.83E-08 | 3.12E-08 | 1           | 5.00E-05    |
| phe.Fasting_rs73864732 | S8 | NEK1 | rs185502834 | S8  | DIAPH1      | 3.66E-12 | 1.49E-04    | 6.60E-09 | 4.48E-09 | 0.182538    | 9.06E-06    |
| phe.Fasting_rs73864732 | S8 | NEK1 | rs185759881 | S7  | DIAPH1      | 1.89E-11 | 7.73E-04    | 2.83E-08 | 3.12E-08 | 1           | 5.00E-05    |
| phe.Fasting_rs73864732 | S8 | NEK1 | rs187000011 | S11 | DIAPH1      | 1.89E-11 | 7.73E-04    | 2.83E-08 | 3.12E-08 | 1           | 5.00E-05    |
| phe.Fasting_rs73864732 | S8 | NEK1 | rs188981295 | S5  | "RPS27AP10, | 1.89E-11 | 7.73E-04    | 2.83E-08 | 3.12E-08 | 1           | 5.00E-05    |
| phe.Fasting_rs73864732 | S8 | NEK1 | rs190559574 | S7  | DIAPH1      | 3.66E-12 | 0.000149366 | 6.60E-09 | 4.48E-09 | 0.182538    | 9.06E-06    |
| phe.Fasting_rs73864732 | S8 | NEK1 | rs191544043 | S8  | DIAPH1      | 1.89E-11 | 7.73E-04    | 2.83E-08 | 3.12E-08 | 1           | 5.00E-05    |
| phe.Fasting_rs73864732 | S8 | NEK1 | rs191766712 | S7  | DIAPH1      | 1.89E-11 | 7.73E-04    | 2.83E-08 | 3.12E-08 | 1           | 5.00E-05    |
| phe.Fasting_rs73864732 | S8 | NEK1 | rs192690040 | S7  | DIAPH1      | 1.89E-11 | 0.000772619 | 2.83E-08 | 3.12E-08 | 1           | 5.00E-05    |
| phe.Fasting_rs73864732 | S8 | NEK1 | rs192765219 | S7  | DIAPH1      | 1.89E-11 | 7.73E-04    | 2.83E-08 | 3.12E-08 | 1           | 5.00E-05    |
| phe.Fasting_rs73864732 | S8 | NEK1 | rs192770525 | S7  | DIAPH1      | 1.89E-11 | 7.73E-04    | 2.83E-08 | 3.12E-08 | 1           | 5.00E-05    |
| phe.Fasting_rs73864732 | S8 | NEK1 | rs2924507   | S5  | ZC3H3       | 4.99E-14 | 2.04E-06    | 1.18E-10 | 1.31E-06 | 1           | 0.00143883  |
| phe.Fasting_rs73864732 | S8 | NEK1 | rs2924508   | S8  | ZC3H3       | 4.99E-14 | 2.04E-06    | 1.18E-10 | 1.83E-06 | 1           | 0.00191245  |
| phe.Fasting_rs73864732 | S8 | NEK1 | rs2924511   | S7  | ZC3H3       | 4.99E-14 | 2.04E-06    | 1.18E-10 | 1.12E-06 | 1           | 0.00124617  |
| phe.Fasting_rs73864732 | S8 | NEK1 | rs2924512   | S7  | ZC3H3       | 5.77E-14 | 2.36E-06    | 1.35E-10 | 1.38E-06 | 1           | 0.0015028   |
| phe.Fasting_rs73864732 | S8 | NEK1 | rs2956376   | S8  | ZC3H3       | 4.99E-14 | 2.04E-06    | 1.18E-10 | 7.59E-07 | 1           | 0.000876595 |
| phe.Fasting_rs73864732 | S8 | NEK1 | rs2980270   | S7  | ZC3H3       | 4.99E-14 | 2.04E-06    | 1.18E-10 | 7.59E-07 | 1           | 0.000876595 |
| phe.Fasting_rs73864732 | S8 | NEK1 | rs2980272   | S7  | ZC3H3       | 5.77E-14 | 2.36E-06    | 1.35E-10 | 1.44E-06 | 1           | 0.0015601   |
| phe.Fasting_rs73864732 | S8 | NEK1 | rs2980275   | S5  | ZC3H3       | 4.99E-14 | 2.04E-06    | 1.18E-10 | 1.31E-06 | 1           | 0.00143883  |
| phe.Fasting_rs73864732 | S8 | NEK1 | rs35990401  | S7  | DIAPH1      | 1.77E-11 | 0.000721305 | 2.67E-08 | 1.17E-08 | 0.475359    | 2.13E-05    |
| phe.Fasting_rs73864732 | S8 | NEK1 | rs366767    | S5  | ZC3H3       | 8.80E-14 | 3.59E-06    | 2.01E-10 | 8.18E-07 | 1           | 0.000940029 |
| phe.Fasting_rs73864732 | S8 | NEK1 | rs55900860  | S7  | DIAPH1      | 3.66E-12 | 0.000149366 | 6.60E-09 | 4.48E-09 | 0.182538    | 9.06E-06    |
| phe.Fasting_rs73864732 | S8 | NEK1 | rs6881310   | S23 | ISL1        | 9.11E-17 | 3.72E-09    | 3.94E-13 | 3.29E-12 | 0.000134008 | 1.39E-08    |
| phe.Fasting_rs73864732 | S8 | NEK1 | rs73619637  | S8  | NA          | 2.21E-16 | 9.03E-09    | 7.55E-13 | 1.75E-08 | 0.713427    | 3.05E-05    |
| phe.Fasting_rs73864732 | S8 | NEK1 | rs77444916  | S23 | LOC642366   | 3.24E-17 | 1.32E-09    | 1.81E-13 | 1.13E-15 | 4.62E-08    | 1.30E-11    |
| phe.Fasting_rs73864732 | S8 | NEK1 | rs77798597  | S7  | KPNA3       | 7.55E-16 | 3.08E-08    | 2.30E-12 | 2.86E-07 | 1           | 3.63E-04    |



|                        |    |      |             |     |             |          |             |          |          |            |             |
|------------------------|----|------|-------------|-----|-------------|----------|-------------|----------|----------|------------|-------------|
| phe.Fasting_rs73864732 | S8 | NEK1 | rs78703708  | S7  | FAF2        | 2.64E-17 | 1.08E-09    | 1.62E-13 | 4.44E-07 | 1          | 0.000536698 |
| phe.Fasting_rs73864732 | S8 | NEK1 | rs78736524  | S5  | KPNA3       | 7.55E-16 | 3.08E-08    | 2.30E-12 | 2.99E-07 | 1          | 0.000377369 |
| phe.Fasting_rs73864732 | S8 | NEK1 | rs79517926  | S15 | "DIAPH1,LOC | 5.97E-12 | 0.000243889 | 1.05E-08 | 1.84E-09 | 0.0750025  | 4.09E-06    |
| phe.Fasting_rs73864732 | S8 | NEK1 | rs79781495  | S8  | KPNA3       | 7.55E-16 | 3.08E-08    | 2.30E-12 | 2.86E-07 | 1          | 0.000362927 |
| phe.Fasting_rs73864732 | S8 | NEK1 | rs80258830  | S24 | LOC642366   | 3.24E-17 | 1.32E-09    | 1.81E-13 | 1.13E-15 | 4.62E-08   | 1.30E-11    |
| phe.Fasting_rs73864732 | S8 | NEK1 | rs80332465  | S5  | KPNA3       | 8.09E-16 | 3.30E-08    | 2.45E-12 | 2.98E-07 | 1          | 0.000377054 |
| phe.Fasting_rs73864732 | S8 | NEK1 | rs80334773  | S5  | KPNA3       | 8.09E-16 | 3.30E-08    | 2.45E-12 | 2.98E-07 | 1          | 0.000377054 |
| phe.Fasting_rs73864740 | S2 | NA   | rs112027720 | S7  | DIAPH1      | 1.87E-11 | 7.63E-04    | 2.80E-08 | 3.12E-08 | 1          | 5.00E-05    |
| phe.Fasting_rs73864740 | S2 | NA   | rs112089881 | S8  | ZFAND4      | 4.14E-18 | 1.69E-10    | 6.16E-14 | 7.07E-09 | 0.287901   | 1.36E-05    |
| phe.Fasting_rs73864740 | S2 | NA   | rs113219478 | S7  | DIAPH1      | 1.87E-11 | 7.63E-04    | 2.80E-08 | 3.12E-08 | 1          | 5.00E-05    |
| phe.Fasting_rs73864740 | S2 | NA   | rs113357907 | S24 | ISL1        | 1.30E-17 | 5.33E-10    | 1.09E-13 | 1.21E-15 | 4.92E-08   | 1.38E-11    |
| phe.Fasting_rs73864740 | S2 | NA   | rs115787552 | S5  | KPNA3       | 7.38E-16 | 3.01E-08    | 2.25E-12 | 2.99E-07 | 1          | 0.000377369 |
| phe.Fasting_rs73864740 | S2 | NA   | rs115888477 | S8  | NA          | 5.60E-15 | 2.29E-07    | 1.45E-11 | 2.31E-08 | 0.940424   | 3.85E-05    |
| phe.Fasting_rs73864740 | S2 | NA   | rs116011837 | S9  | BRD2        | 5.05E-17 | 2.06E-09    | 2.49E-13 | 1.69E-10 | 0.00686251 | 4.88E-07    |
| phe.Fasting_rs73864740 | S2 | NA   | rs116079984 | S8  | KPNA3       | 7.38E-16 | 3.01E-08    | 2.25E-12 | 3.51E-07 | 1          | 0.000436125 |
| phe.Fasting_rs73864740 | S2 | NA   | rs116120727 | S9  | BRD2        | 5.05E-17 | 2.06E-09    | 2.49E-13 | 1.69E-10 | 0.00686251 | 4.88E-07    |
| phe.Fasting_rs73864740 | S2 | NA   | rs138090701 | S5  | HDAC3       | 2.27E-12 | 9.26E-05    | 4.24E-09 | 1.87E-08 | 0.760637   | 3.23E-05    |
| phe.Fasting_rs73864740 | S2 | NA   | rs138136869 | S7  | DIAPH1      | 3.54E-12 | 0.000144562 | 6.40E-09 | 4.48E-09 | 0.182538   | 9.06E-06    |
| phe.Fasting_rs73864740 | S2 | NA   | rs138457103 | S10 | DIAPH1      | 1.12E-11 | 0.00045829  | 1.77E-08 | 2.89E-08 | 1          | 4.71E-05    |
| phe.Fasting_rs73864740 | S2 | NA   | rs138487229 | S11 | DIAPH1      | 1.87E-11 | 0.000763044 | 2.80E-08 | 3.12E-08 | 1          | 5.00E-05    |
| phe.Fasting_rs73864740 | S2 | NA   | rs138738950 | S8  | "PCDHGB2,PI | 1.87E-11 | 7.63E-04    | 2.80E-08 | 3.11E-08 | 1          | 5.00E-05    |
| phe.Fasting_rs73864740 | S2 | NA   | rs139297927 | S8  | DIAPH1      | 1.87E-11 | 0.000763044 | 2.80E-08 | 3.12E-08 | 1          | 5.00E-05    |
| phe.Fasting_rs73864740 | S2 | NA   | rs139337303 | S8  | DIAPH1      | 1.87E-11 | 0.000763044 | 2.80E-08 | 3.12E-08 | 1          | 5.00E-05    |
| phe.Fasting_rs73864740 | S2 | NA   | rs139403963 | S8  | DIAPH1      | 3.54E-12 | 0.000144562 | 6.40E-09 | 4.48E-09 | 0.182538   | 9.06E-06    |
| phe.Fasting_rs73864740 | S2 | NA   | rs139621309 | S18 | "LOC1005056 | 1.87E-11 | 0.000763044 | 2.80E-08 | 3.12E-08 | 1          | 5.00E-05    |
| phe.Fasting_rs73864740 | S2 | NA   | rs139828110 | S8  | DIAPH1      | 3.54E-12 | 1.45E-04    | 6.40E-09 | 4.48E-09 | 0.182538   | 9.06E-06    |
| phe.Fasting_rs73864740 | S2 | NA   | rs140070363 | S8  | DIAPH1      | 1.87E-11 | 7.63E-04    | 2.80E-08 | 3.12E-08 | 1          | 5.00E-05    |
| phe.Fasting_rs73864740 | S2 | NA   | rs140644750 | S13 | DIAPH1      | 1.87E-11 | 7.63E-04    | 2.80E-08 | 3.12E-08 | 1          | 5.00E-05    |
| phe.Fasting_rs73864740 | S2 | NA   | rs141022544 | S8  | DIAPH1      | 1.87E-11 | 7.63E-04    | 2.80E-08 | 3.12E-08 | 1          | 5.00E-05    |
| phe.Fasting_rs73864740 | S2 | NA   | rs141525984 | S5  | DIAPH1      | 1.87E-11 | 0.000763044 | 2.80E-08 | 3.12E-08 | 1          | 5.00E-05    |
| phe.Fasting_rs73864740 | S2 | NA   | rs141926074 | S8  | ATE1        | 2.55E-06 | 1.00E+00    | 1.38E-03 | 2.76E-14 | 1.13E-06   | 2.08E-10    |
| phe.Fasting_rs73864740 | S2 | NA   | rs142480565 | S8  | DIAPH1      | 1.87E-11 | 7.63E-04    | 2.80E-08 | 3.12E-08 | 1          | 5.00E-05    |
| phe.Fasting_rs73864740 | S2 | NA   | rs142718558 | S7  | "DIAPH1,LOC | 1.87E-11 | 7.63E-04    | 2.80E-08 | 3.12E-08 | 1          | 5.00E-05    |
| phe.Fasting_rs73864740 | S2 | NA   | rs142789100 | S8  | DIAPH1      | 3.54E-12 | 1.45E-04    | 6.40E-09 | 4.48E-09 | 0.182538   | 9.06E-06    |
| phe.Fasting_rs73864740 | S2 | NA   | rs142812798 | S7  | DIAPH1      | 3.54E-12 | 1.45E-04    | 6.40E-09 | 4.48E-09 | 0.182538   | 9.06E-06    |
| phe.Fasting_rs73864740 | S2 | NA   | rs143377827 | S13 | "DIAPH1,LOC | 3.11E-12 | 0.00012707  | 5.69E-09 | 3.71E-09 | 0.151122   | 7.67E-06    |
| phe.Fasting_rs73864740 | S2 | NA   | rs143691978 | S11 | DIAPH1      | 3.54E-12 | 0.000144562 | 6.40E-09 | 7.03E-09 | 0.286317   | 1.35E-05    |
| phe.Fasting_rs73864740 | S2 | NA   | rs144081334 | S11 | DIAPH1      | 3.54E-12 | 1.45E-04    | 6.40E-09 | 7.03E-09 | 0.286317   | 1.35E-05    |
| phe.Fasting_rs73864740 | S2 | NA   | rs144613910 | S8  | DIAPH1      | 1.87E-11 | 7.63E-04    | 2.80E-08 | 3.12E-08 | 1          | 5.00E-05    |
| phe.Fasting_rs73864740 | S2 | NA   | rs145027704 | S11 | DIAPH1      | 3.54E-12 | 1.45E-04    | 6.40E-09 | 7.03E-09 | 0.286317   | 1.35E-05    |

|                        |    |    |             |     |             |          |             |          |          |           |             |
|------------------------|----|----|-------------|-----|-------------|----------|-------------|----------|----------|-----------|-------------|
| phe.Fasting_rs73864740 | S2 | NA | rs146220673 | S7  | DIAPH1      | 1.87E-11 | 7.63E-04    | 2.80E-08 | 3.12E-08 | 1         | 5.00E-05    |
| phe.Fasting_rs73864740 | S2 | NA | rs146622060 | S13 | DIAPH1      | 3.54E-12 | 1.45E-04    | 6.40E-09 | 7.03E-09 | 0.286317  | 1.35E-05    |
| phe.Fasting_rs73864740 | S2 | NA | rs146815317 | S5  | KPNA3       | 7.38E-16 | 3.01E-08    | 2.25E-12 | 2.99E-07 | 1         | 0.000377369 |
| phe.Fasting_rs73864740 | S2 | NA | rs146878162 | S7  | DIAPH1      | 1.87E-11 | 0.000763044 | 2.80E-08 | 3.12E-08 | 1         | 5.00E-05    |
| phe.Fasting_rs73864740 | S2 | NA | rs1470889   | S5  | ZC3H3       | 4.25E-14 | 1.73E-06    | 1.01E-10 | 1.31E-06 | 1         | 0.00143883  |
| phe.Fasting_rs73864740 | S2 | NA | rs1470890   | S5  | ZC3H3       | 4.25E-14 | 1.73E-06    | 1.01E-10 | 1.31E-06 | 1         | 0.00143883  |
| phe.Fasting_rs73864740 | S2 | NA | rs147314451 | S8  | DIAPH1      | 1.87E-11 | 0.000763044 | 2.80E-08 | 3.12E-08 | 1         | 5.00E-05    |
| phe.Fasting_rs73864740 | S2 | NA | rs147417996 | S7  | DIAPH1      | 3.54E-12 | 0.000144562 | 6.40E-09 | 7.03E-09 | 0.286317  | 1.35E-05    |
| phe.Fasting_rs73864740 | S2 | NA | rs147646948 | S7  | "LOC1005056 | 1.87E-11 | 0.000763044 | 2.80E-08 | 3.12E-08 | 1         | 5.00E-05    |
| phe.Fasting_rs73864740 | S2 | NA | rs147677041 | S8  | DIAPH1      | 3.54E-12 | 0.000144562 | 6.40E-09 | 4.48E-09 | 0.182538  | 9.06E-06    |
| phe.Fasting_rs73864740 | S2 | NA | rs148116628 | S7  | DIAPH1      | 1.87E-11 | 0.000763044 | 2.80E-08 | 3.12E-08 | 1         | 5.00E-05    |
| phe.Fasting_rs73864740 | S2 | NA | rs148423011 | S7  | DIAPH1      | 1.87E-11 | 7.63E-04    | 2.80E-08 | 3.12E-08 | 1         | 5.00E-05    |
| phe.Fasting_rs73864740 | S2 | NA | rs149019627 | S8  | DIAPH1      | 3.54E-12 | 1.45E-04    | 6.40E-09 | 4.48E-09 | 0.182538  | 9.06E-06    |
| phe.Fasting_rs73864740 | S2 | NA | rs149075406 | S8  | DIAPH1      | 1.87E-11 | 7.63E-04    | 2.80E-08 | 3.12E-08 | 1         | 5.00E-05    |
| phe.Fasting_rs73864740 | S2 | NA | rs149334783 | S8  | DIAPH1      | 1.87E-11 | 7.63E-04    | 2.80E-08 | 3.12E-08 | 1         | 5.00E-05    |
| phe.Fasting_rs73864740 | S2 | NA | rs149716949 | S5  | DIAPH1      | 1.68E-12 | 6.88E-05    | 3.23E-09 | 3.84E-09 | 0.15623   | 7.90E-06    |
| phe.Fasting_rs73864740 | S2 | NA | rs149791570 | S5  | DIAPH1      | 3.54E-12 | 1.45E-04    | 6.40E-09 | 4.48E-09 | 0.182538  | 9.06E-06    |
| phe.Fasting_rs73864740 | S2 | NA | rs150117838 | S8  | KPNA3       | 7.38E-16 | 3.01E-08    | 2.25E-12 | 2.86E-07 | 1         | 0.000362927 |
| phe.Fasting_rs73864740 | S2 | NA | rs150452206 | S13 | "DIAPH1,LOC | 1.87E-11 | 7.63E-04    | 2.80E-08 | 3.12E-08 | 1         | 5.00E-05    |
| phe.Fasting_rs73864740 | S2 | NA | rs150675915 | S7  | DIAPH1      | 1.87E-11 | 0.000763044 | 2.80E-08 | 3.12E-08 | 1         | 5.00E-05    |
| phe.Fasting_rs73864740 | S2 | NA | rs150765570 | S7  | DIAPH1      | 1.87E-11 | 7.63E-04    | 2.80E-08 | 3.12E-08 | 1         | 5.00E-05    |
| phe.Fasting_rs73864740 | S2 | NA | rs150992994 | S11 | "PCDHGA5,PI | 1.94E-11 | 0.000793426 | 2.90E-08 | 2.98E-08 | 1         | 4.84E-05    |
| phe.Fasting_rs73864740 | S2 | NA | rs151204700 | S8  | DIAPH1      | 1.87E-11 | 7.63E-04    | 2.80E-08 | 3.12E-08 | 1         | 5.00E-05    |
| phe.Fasting_rs73864740 | S2 | NA | rs151330468 | S8  | DIAPH1      | 3.54E-12 | 0.000144562 | 6.40E-09 | 7.03E-09 | 0.286317  | 1.35E-05    |
| phe.Fasting_rs73864740 | S2 | NA | rs16894241  | S4  | HIST1H2BK   | 1.14E-07 | 1           | 8.56E-05 | 6.83E-07 | 1         | 0.000796439 |
| phe.Fasting_rs73864740 | S2 | NA | rs180772028 | S8  | "DIAPH1,LOC | 1.87E-11 | 7.63E-04    | 2.80E-08 | 3.12E-08 | 1         | 5.00E-05    |
| phe.Fasting_rs73864740 | S2 | NA | rs181224861 | S7  | DIAPH1      | 1.87E-11 | 0.000763044 | 2.80E-08 | 3.12E-08 | 1         | 5.00E-05    |
| phe.Fasting_rs73864740 | S2 | NA | rs182714699 | S8  | DIAPH1      | 1.87E-11 | 0.000763044 | 2.80E-08 | 3.12E-08 | 1         | 5.00E-05    |
| phe.Fasting_rs73864740 | S2 | NA | rs182965141 | S8  | DIAPH1      | 4.31E-12 | 1.76E-04    | 7.73E-09 | 2.45E-09 | 0.0998086 | 5.29E-06    |
| phe.Fasting_rs73864740 | S2 | NA | rs183597049 | S7  | DIAPH1      | 1.87E-11 | 0.000763044 | 2.80E-08 | 3.12E-08 | 1         | 5.00E-05    |
| phe.Fasting_rs73864740 | S2 | NA | rs183980988 | S2  | NA          | 1.87E-11 | 0.000763044 | 2.80E-08 | 3.12E-08 | 1         | 5.00E-05    |
| phe.Fasting_rs73864740 | S2 | NA | rs184233232 | S7  | DIAPH1      | 1.87E-11 | 0.000763044 | 2.80E-08 | 3.12E-08 | 1         | 5.00E-05    |
| phe.Fasting_rs73864740 | S2 | NA | rs184509477 | S13 | "PCDHGB4,PI | 1.87E-11 | 0.000763044 | 2.80E-08 | 3.12E-08 | 1         | 5.00E-05    |
| phe.Fasting_rs73864740 | S2 | NA | rs185069296 | S15 | "LOC1005056 | 1.87E-11 | 7.63E-04    | 2.80E-08 | 3.12E-08 | 1         | 5.00E-05    |
| phe.Fasting_rs73864740 | S2 | NA | rs185502834 | S8  | DIAPH1      | 3.54E-12 | 0.000144562 | 6.40E-09 | 4.48E-09 | 0.182538  | 9.06E-06    |
| phe.Fasting_rs73864740 | S2 | NA | rs185759881 | S7  | DIAPH1      | 1.87E-11 | 0.000763044 | 2.80E-08 | 3.12E-08 | 1         | 5.00E-05    |
| phe.Fasting_rs73864740 | S2 | NA | rs187000011 | S11 | DIAPH1      | 1.87E-11 | 0.000763044 | 2.80E-08 | 3.12E-08 | 1         | 5.00E-05    |
| phe.Fasting_rs73864740 | S2 | NA | rs188981295 | S5  | "RPS27AP10, | 1.87E-11 | 7.63E-04    | 2.80E-08 | 3.12E-08 | 1         | 5.00E-05    |
| phe.Fasting_rs73864740 | S2 | NA | rs190559574 | S7  | DIAPH1      | 3.54E-12 | 1.45E-04    | 6.40E-09 | 4.48E-09 | 0.182538  | 9.06E-06    |
| phe.Fasting_rs73864740 | S2 | NA | rs191544043 | S8  | DIAPH1      | 1.87E-11 | 7.63E-04    | 2.80E-08 | 3.12E-08 | 1         | 5.00E-05    |

|                        |    |       |             |     |             |          |             |          |          |             |             |
|------------------------|----|-------|-------------|-----|-------------|----------|-------------|----------|----------|-------------|-------------|
| phe.Fasting_rs73864740 | S2 | NA    | rs191766712 | S7  | DIAPH1      | 1.87E-11 | 0.000763044 | 2.80E-08 | 3.12E-08 | 1           | 5.00E-05    |
| phe.Fasting_rs73864740 | S2 | NA    | rs192690040 | S7  | DIAPH1      | 1.87E-11 | 7.63E-04    | 2.80E-08 | 3.12E-08 | 1           | 5.00E-05    |
| phe.Fasting_rs73864740 | S2 | NA    | rs192765219 | S7  | DIAPH1      | 1.87E-11 | 7.63E-04    | 2.80E-08 | 3.12E-08 | 1           | 5.00E-05    |
| phe.Fasting_rs73864740 | S2 | NA    | rs192770525 | S7  | DIAPH1      | 1.87E-11 | 7.63E-04    | 2.80E-08 | 3.12E-08 | 1           | 5.00E-05    |
| phe.Fasting_rs73864740 | S2 | NA    | rs2924507   | S5  | ZC3H3       | 4.25E-14 | 1.73E-06    | 1.01E-10 | 1.31E-06 | 1           | 0.00143883  |
| phe.Fasting_rs73864740 | S2 | NA    | rs2924508   | S8  | ZC3H3       | 4.25E-14 | 1.73E-06    | 1.01E-10 | 1.83E-06 | 1           | 0.00191245  |
| phe.Fasting_rs73864740 | S2 | NA    | rs2924511   | S7  | ZC3H3       | 4.25E-14 | 1.73E-06    | 1.01E-10 | 1.12E-06 | 1           | 0.00124617  |
| phe.Fasting_rs73864740 | S2 | NA    | rs2924512   | S7  | ZC3H3       | 4.91E-14 | 2.01E-06    | 1.16E-10 | 1.38E-06 | 1           | 0.0015028   |
| phe.Fasting_rs73864740 | S2 | NA    | rs2956376   | S8  | ZC3H3       | 4.25E-14 | 1.73E-06    | 1.01E-10 | 7.59E-07 | 1           | 0.000876595 |
| phe.Fasting_rs73864740 | S2 | NA    | rs2980270   | S7  | ZC3H3       | 4.25E-14 | 1.73E-06    | 1.01E-10 | 7.59E-07 | 1           | 0.000876595 |
| phe.Fasting_rs73864740 | S2 | NA    | rs2980272   | S7  | ZC3H3       | 4.91E-14 | 2.01E-06    | 1.16E-10 | 1.44E-06 | 1           | 0.0015601   |
| phe.Fasting_rs73864740 | S2 | NA    | rs2980275   | S5  | ZC3H3       | 4.25E-14 | 1.73E-06    | 1.01E-10 | 1.31E-06 | 1           | 0.00143883  |
| phe.Fasting_rs73864740 | S2 | NA    | rs35990401  | S7  | DIAPH1      | 1.73E-11 | 0.000704707 | 2.62E-08 | 1.17E-08 | 0.475359    | 2.13E-05    |
| phe.Fasting_rs73864740 | S2 | NA    | rs366767    | S5  | ZC3H3       | 7.46E-14 | 3.05E-06    | 1.72E-10 | 8.18E-07 | 1           | 0.000940029 |
| phe.Fasting_rs73864740 | S2 | NA    | rs55900860  | S7  | DIAPH1      | 3.54E-12 | 1.45E-04    | 6.40E-09 | 4.48E-09 | 0.182538    | 9.06E-06    |
| phe.Fasting_rs73864740 | S2 | NA    | rs6881310   | S23 | ISL1        | 8.85E-17 | 3.61E-09    | 3.83E-13 | 3.29E-12 | 0.000134008 | 1.39E-08    |
| phe.Fasting_rs73864740 | S2 | NA    | rs73619637  | S8  | NA          | 2.14E-16 | 8.75E-09    | 7.33E-13 | 1.75E-08 | 0.713427    | 3.05E-05    |
| phe.Fasting_rs73864740 | S2 | NA    | rs77444916  | S23 | LOC642366   | 3.15E-17 | 1.29E-09    | 1.77E-13 | 1.13E-15 | 4.62E-08    | 1.30E-11    |
| phe.Fasting_rs73864740 | S2 | NA    | rs77798597  | S7  | KPNA3       | 7.38E-16 | 3.01E-08    | 2.25E-12 | 2.86E-07 | 1           | 0.000362927 |
| phe.Fasting_rs73864740 | S2 | NA    | rs78703708  | S7  | FAF2        | 2.55E-17 | 1.04E-09    | 1.58E-13 | 4.44E-07 | 1           | 0.000536698 |
| phe.Fasting_rs73864740 | S2 | NA    | rs78736524  | S5  | KPNA3       | 7.38E-16 | 3.01E-08    | 2.25E-12 | 2.99E-07 | 1           | 0.000377369 |
| phe.Fasting_rs73864740 | S2 | NA    | rs79517926  | S15 | "DIAPH1,LOC | 5.87E-12 | 0.000239796 | 1.03E-08 | 1.84E-09 | 0.0750025   | 4.09E-06    |
| phe.Fasting_rs73864740 | S2 | NA    | rs79781495  | S8  | KPNA3       | 7.38E-16 | 3.01E-08    | 2.25E-12 | 2.86E-07 | 1           | 3.63E-04    |
| phe.Fasting_rs73864740 | S2 | NA    | rs80258830  | S24 | LOC642366   | 3.15E-17 | 1.29E-09    | 1.77E-13 | 1.13E-15 | 4.62E-08    | 1.30E-11    |
| phe.Fasting_rs73864740 | S2 | NA    | rs80332465  | S5  | KPNA3       | 7.91E-16 | 3.23E-08    | 2.40E-12 | 2.98E-07 | 1           | 0.000377054 |
| phe.Fasting_rs73864740 | S2 | NA    | rs80334773  | S5  | KPNA3       | 7.91E-16 | 3.23E-08    | 2.40E-12 | 2.98E-07 | 1           | 0.000377054 |
| phe.Fasting_rs73864759 | S8 | CLCN3 | rs112027720 | S7  | DIAPH1      | 6.48E-12 | 2.65E-04    | 1.13E-08 | 1.49E-08 | 0.608284    | 2.65E-05    |
| phe.Fasting_rs73864759 | S8 | CLCN3 | rs112089881 | S8  | ZFAND4      | 5.95E-10 | 2.43E-02    | 6.75E-07 | 4.55E-06 | 1           | 0.00422197  |
| phe.Fasting_rs73864759 | S8 | CLCN3 | rs113219478 | S7  | DIAPH1      | 6.48E-12 | 0.000264637 | 1.13E-08 | 1.49E-08 | 0.608284    | 2.65E-05    |
| phe.Fasting_rs73864759 | S8 | CLCN3 | rs113357907 | S24 | ISL1        | 3.21E-18 | 1.31E-10    | 5.44E-14 | 6.03E-16 | 2.45E-08    | 1.16E-11    |
| phe.Fasting_rs73864759 | S8 | CLCN3 | rs115787552 | S5  | KPNA3       | 1.98E-16 | 8.11E-09    | 6.92E-13 | 1.29E-07 | 1           | 0.000178548 |
| phe.Fasting_rs73864759 | S8 | CLCN3 | rs115888477 | S8  | NA          | 1.55E-15 | 6.35E-08    | 4.46E-12 | 9.65E-09 | 0.39269     | 1.81E-05    |
| phe.Fasting_rs73864759 | S8 | CLCN3 | rs116011837 | S9  | BRD2        | 1.28E-17 | 5.24E-10    | 1.08E-13 | 1.59E-10 | 0.00649019  | 4.65E-07    |
| phe.Fasting_rs73864759 | S8 | CLCN3 | rs116079984 | S8  | KPNA3       | 1.98E-16 | 8.11E-09    | 6.92E-13 | 1.56E-07 | 1           | 0.000211109 |
| phe.Fasting_rs73864759 | S8 | CLCN3 | rs116120727 | S9  | BRD2        | 1.28E-17 | 5.24E-10    | 1.08E-13 | 1.59E-10 | 0.00649019  | 4.65E-07    |
| phe.Fasting_rs73864759 | S8 | CLCN3 | rs116279995 | S20 | "PCDHGA4,Pi | 1.42E-05 | 1.00E+00    | 6.17E-03 | 1.50E-07 | 1           | 0.000204496 |
| phe.Fasting_rs73864759 | S8 | CLCN3 | rs138090701 | S5  | HDAC3       | 6.54E-13 | 2.67E-05    | 1.37E-09 | 8.01E-09 | 0.326171    | 1.53E-05    |
| phe.Fasting_rs73864759 | S8 | CLCN3 | rs138136869 | S7  | DIAPH1      | 1.12E-12 | 4.56E-05    | 2.25E-09 | 1.98E-09 | 0.080627    | 4.38E-06    |
| phe.Fasting_rs73864759 | S8 | CLCN3 | rs138457103 | S10 | DIAPH1      | 3.79E-12 | 1.55E-04    | 6.83E-09 | 1.41E-08 | 0.57194     | 2.52E-05    |
| phe.Fasting_rs73864759 | S8 | CLCN3 | rs138487229 | S11 | DIAPH1      | 6.48E-12 | 2.65E-04    | 1.13E-08 | 1.49E-08 | 0.608284    | 2.65E-05    |

|                        |    |       |             |     |              |          |             |          |          |           |             |
|------------------------|----|-------|-------------|-----|--------------|----------|-------------|----------|----------|-----------|-------------|
| phe.Fasting_rs73864759 | S8 | CLCN3 | rs138738950 | S8  | "PCDHGB2,Pi  | 6.48E-12 | 2.65E-04    | 1.13E-08 | 1.49E-08 | 0.605195  | 2.64E-05    |
| phe.Fasting_rs73864759 | S8 | CLCN3 | rs139297927 | S8  | DIAPH1       | 6.48E-12 | 0.000264637 | 1.13E-08 | 1.49E-08 | 0.608284  | 2.65E-05    |
| phe.Fasting_rs73864759 | S8 | CLCN3 | rs139337303 | S8  | DIAPH1       | 6.48E-12 | 0.000264637 | 1.13E-08 | 1.49E-08 | 0.608284  | 2.65E-05    |
| phe.Fasting_rs73864759 | S8 | CLCN3 | rs139403963 | S8  | DIAPH1       | 1.12E-12 | 4.56E-05    | 2.25E-09 | 1.98E-09 | 0.080627  | 4.38E-06    |
| phe.Fasting_rs73864759 | S8 | CLCN3 | rs139621309 | S18 | "LOC10050505 | 6.48E-12 | 0.000264637 | 1.13E-08 | 1.49E-08 | 0.608284  | 2.65E-05    |
| phe.Fasting_rs73864759 | S8 | CLCN3 | rs139828110 | S8  | DIAPH1       | 1.12E-12 | 4.56E-05    | 2.25E-09 | 1.98E-09 | 0.080627  | 4.38E-06    |
| phe.Fasting_rs73864759 | S8 | CLCN3 | rs140070363 | S8  | DIAPH1       | 6.48E-12 | 0.000264637 | 1.13E-08 | 1.49E-08 | 0.608284  | 2.65E-05    |
| phe.Fasting_rs73864759 | S8 | CLCN3 | rs140644750 | S13 | DIAPH1       | 6.48E-12 | 2.65E-04    | 1.13E-08 | 1.49E-08 | 0.608284  | 2.65E-05    |
| phe.Fasting_rs73864759 | S8 | CLCN3 | rs141022544 | S8  | DIAPH1       | 6.48E-12 | 0.000264637 | 1.13E-08 | 1.49E-08 | 0.608284  | 2.65E-05    |
| phe.Fasting_rs73864759 | S8 | CLCN3 | rs141525984 | S5  | DIAPH1       | 6.48E-12 | 0.000264637 | 1.13E-08 | 1.49E-08 | 0.608284  | 2.65E-05    |
| phe.Fasting_rs73864759 | S8 | CLCN3 | rs141692339 | S3  | "PCDHGA6,Pi  | 1.71E-05 | 1           | 7.27E-03 | 2.08E-07 | 1         | 0.000273582 |
| phe.Fasting_rs73864759 | S8 | CLCN3 | rs141926074 | S8  | ATE1         | 8.39E-07 | 1           | 5.18E-04 | 1.31E-14 | 5.34E-07  | 1.12E-10    |
| phe.Fasting_rs73864759 | S8 | CLCN3 | rs142480565 | S8  | DIAPH1       | 6.48E-12 | 2.65E-04    | 1.13E-08 | 1.49E-08 | 0.608284  | 2.65E-05    |
| phe.Fasting_rs73864759 | S8 | CLCN3 | rs142718558 | S7  | "DIAPH1,LOC  | 6.48E-12 | 2.65E-04    | 1.13E-08 | 1.49E-08 | 0.608284  | 2.65E-05    |
| phe.Fasting_rs73864759 | S8 | CLCN3 | rs142789100 | S8  | DIAPH1       | 1.12E-12 | 4.56E-05    | 2.25E-09 | 1.98E-09 | 0.080627  | 4.38E-06    |
| phe.Fasting_rs73864759 | S8 | CLCN3 | rs142812798 | S7  | DIAPH1       | 1.12E-12 | 4.56E-05    | 2.25E-09 | 1.98E-09 | 0.080627  | 4.38E-06    |
| phe.Fasting_rs73864759 | S8 | CLCN3 | rs143377827 | S13 | "DIAPH1,LOC  | 9.85E-13 | 4.02E-05    | 2.03E-09 | 1.63E-09 | 0.0664337 | 3.68E-06    |
| phe.Fasting_rs73864759 | S8 | CLCN3 | rs143691978 | S11 | DIAPH1       | 1.12E-12 | 4.56E-05    | 2.25E-09 | 3.27E-09 | 0.133218  | 6.88E-06    |
| phe.Fasting_rs73864759 | S8 | CLCN3 | rs144081334 | S11 | DIAPH1       | 1.12E-12 | 4.56E-05    | 2.25E-09 | 3.27E-09 | 0.133218  | 6.88E-06    |
| phe.Fasting_rs73864759 | S8 | CLCN3 | rs144613910 | S8  | DIAPH1       | 6.48E-12 | 2.65E-04    | 1.13E-08 | 1.49E-08 | 0.608284  | 2.65E-05    |
| phe.Fasting_rs73864759 | S8 | CLCN3 | rs145027704 | S11 | DIAPH1       | 1.12E-12 | 4.56E-05    | 2.25E-09 | 3.27E-09 | 0.133218  | 6.88E-06    |
| phe.Fasting_rs73864759 | S8 | CLCN3 | rs146220673 | S7  | DIAPH1       | 6.48E-12 | 0.000264637 | 1.13E-08 | 1.49E-08 | 0.608284  | 2.65E-05    |
| phe.Fasting_rs73864759 | S8 | CLCN3 | rs146622060 | S13 | DIAPH1       | 1.12E-12 | 4.56E-05    | 2.25E-09 | 3.27E-09 | 0.133218  | 6.88E-06    |
| phe.Fasting_rs73864759 | S8 | CLCN3 | rs146815317 | S5  | KPNA3        | 1.98E-16 | 8.11E-09    | 6.92E-13 | 1.29E-07 | 1         | 0.000178548 |
| phe.Fasting_rs73864759 | S8 | CLCN3 | rs146878162 | S7  | DIAPH1       | 6.48E-12 | 2.65E-04    | 1.13E-08 | 1.49E-08 | 0.608284  | 2.65E-05    |
| phe.Fasting_rs73864759 | S8 | CLCN3 | rs147314451 | S8  | DIAPH1       | 6.48E-12 | 2.65E-04    | 1.13E-08 | 1.49E-08 | 0.608284  | 2.65E-05    |
| phe.Fasting_rs73864759 | S8 | CLCN3 | rs147417996 | S7  | DIAPH1       | 1.12E-12 | 4.56E-05    | 2.25E-09 | 3.27E-09 | 0.133218  | 6.88E-06    |
| phe.Fasting_rs73864759 | S8 | CLCN3 | rs147506725 | S21 | "PCDHGA1,Pi  | 1.42E-05 | 1           | 6.17E-03 | 1.50E-07 | 1         | 0.000204496 |
| phe.Fasting_rs73864759 | S8 | CLCN3 | rs147646948 | S7  | "LOC10050505 | 6.48E-12 | 0.000264637 | 1.13E-08 | 1.49E-08 | 0.608284  | 2.65E-05    |
| phe.Fasting_rs73864759 | S8 | CLCN3 | rs147677041 | S8  | DIAPH1       | 1.12E-12 | 4.56E-05    | 2.25E-09 | 1.98E-09 | 0.080627  | 4.38E-06    |
| phe.Fasting_rs73864759 | S8 | CLCN3 | rs148116628 | S7  | DIAPH1       | 6.48E-12 | 0.000264637 | 1.13E-08 | 1.49E-08 | 0.608284  | 2.65E-05    |
| phe.Fasting_rs73864759 | S8 | CLCN3 | rs148423011 | S7  | DIAPH1       | 6.48E-12 | 0.000264637 | 1.13E-08 | 1.49E-08 | 0.608284  | 2.65E-05    |
| phe.Fasting_rs73864759 | S8 | CLCN3 | rs149019627 | S8  | DIAPH1       | 1.12E-12 | 4.56E-05    | 2.25E-09 | 1.98E-09 | 0.080627  | 4.38E-06    |
| phe.Fasting_rs73864759 | S8 | CLCN3 | rs149075406 | S8  | DIAPH1       | 6.48E-12 | 2.65E-04    | 1.13E-08 | 1.49E-08 | 0.608284  | 2.65E-05    |
| phe.Fasting_rs73864759 | S8 | CLCN3 | rs149334783 | S8  | DIAPH1       | 6.48E-12 | 2.65E-04    | 1.13E-08 | 1.49E-08 | 0.608284  | 2.65E-05    |
| phe.Fasting_rs73864759 | S8 | CLCN3 | rs149553852 | S21 | "PCDHGA10,   | 1.42E-05 | 1.00E+00    | 6.17E-03 | 1.50E-07 | 1         | 0.000204496 |
| phe.Fasting_rs73864759 | S8 | CLCN3 | rs149716949 | S5  | DIAPH1       | 5.07E-13 | 2.07E-05    | 1.07E-09 | 1.74E-09 | 0.0706524 | 3.88E-06    |
| phe.Fasting_rs73864759 | S8 | CLCN3 | rs149791570 | S5  | DIAPH1       | 1.12E-12 | 4.56E-05    | 2.25E-09 | 1.98E-09 | 0.080627  | 4.38E-06    |
| phe.Fasting_rs73864759 | S8 | CLCN3 | rs150117838 | S8  | KPNA3        | 1.98E-16 | 8.11E-09    | 6.92E-13 | 1.25E-07 | 1         | 0.000173671 |
| phe.Fasting_rs73864759 | S8 | CLCN3 | rs150452206 | S13 | "DIAPH1,LOC  | 6.48E-12 | 0.000264637 | 1.13E-08 | 1.49E-08 | 0.608284  | 2.65E-05    |

|                        |    |       |             |     |             |          |             |            |          |           |             |
|------------------------|----|-------|-------------|-----|-------------|----------|-------------|------------|----------|-----------|-------------|
| phe.Fasting_rs73864759 | S8 | CLCN3 | rs150675915 | S7  | DIAPH1      | 6.48E-12 | 0.000264637 | 1.13E-08   | 1.49E-08 | 0.608284  | 2.65E-05    |
| phe.Fasting_rs73864759 | S8 | CLCN3 | rs150765570 | S7  | DIAPH1      | 6.48E-12 | 0.000264637 | 1.13E-08   | 1.49E-08 | 0.608284  | 2.65E-05    |
| phe.Fasting_rs73864759 | S8 | CLCN3 | rs150992994 | S11 | "PCDHGA5,PI | 6.70E-12 | 0.000273722 | 1.16E-08   | 1.45E-08 | 0.589488  | 2.58E-05    |
| phe.Fasting_rs73864759 | S8 | CLCN3 | rs151204700 | S8  | DIAPH1      | 6.48E-12 | 0.000264637 | 1.13E-08   | 1.49E-08 | 0.608284  | 2.65E-05    |
| phe.Fasting_rs73864759 | S8 | CLCN3 | rs151330468 | S8  | DIAPH1      | 1.12E-12 | 4.56E-05    | 2.25E-09   | 3.27E-09 | 0.133218  | 6.88E-06    |
| phe.Fasting_rs73864759 | S8 | CLCN3 | rs16894241  | S4  | HIST1H2BK   | 3.77E-08 | 1.00E+00    | 3.17E-05   | 3.80E-07 | 1         | 0.000469583 |
| phe.Fasting_rs73864759 | S8 | CLCN3 | rs180772028 | S8  | "DIAPH1,LOC | 6.48E-12 | 2.65E-04    | 1.13E-08   | 1.49E-08 | 0.608284  | 2.65E-05    |
| phe.Fasting_rs73864759 | S8 | CLCN3 | rs181224861 | S7  | DIAPH1      | 6.48E-12 | 2.65E-04    | 1.13E-08   | 1.49E-08 | 0.608284  | 2.65E-05    |
| phe.Fasting_rs73864759 | S8 | CLCN3 | rs181247960 | S21 | "PCDHGA9,PI | 1.42E-05 | 1           | 6.17E-03   | 1.50E-07 | 1         | 0.000204496 |
| phe.Fasting_rs73864759 | S8 | CLCN3 | rs181824655 | S21 | "PCDHGB6,PI | 1.42E-05 | 1           | 0.00616571 | 1.50E-07 | 1         | 0.000204496 |
| phe.Fasting_rs73864759 | S8 | CLCN3 | rs182714699 | S8  | DIAPH1      | 6.48E-12 | 2.65E-04    | 1.13E-08   | 1.49E-08 | 0.608284  | 2.65E-05    |
| phe.Fasting_rs73864759 | S8 | CLCN3 | rs182965141 | S8  | DIAPH1      | 1.40E-12 | 5.71E-05    | 2.75E-09   | 1.02E-09 | 0.0414814 | 2.42E-06    |
| phe.Fasting_rs73864759 | S8 | CLCN3 | rs183597049 | S7  | DIAPH1      | 6.48E-12 | 0.000264637 | 1.13E-08   | 1.49E-08 | 0.608284  | 2.65E-05    |
| phe.Fasting_rs73864759 | S8 | CLCN3 | rs183980988 | S2  | NA          | 6.48E-12 | 2.65E-04    | 1.13E-08   | 1.49E-08 | 0.608284  | 2.65E-05    |
| phe.Fasting_rs73864759 | S8 | CLCN3 | rs184233232 | S7  | DIAPH1      | 6.48E-12 | 2.65E-04    | 1.13E-08   | 1.49E-08 | 0.608284  | 2.65E-05    |
| phe.Fasting_rs73864759 | S8 | CLCN3 | rs184509477 | S13 | "PCDHGB4,PI | 6.48E-12 | 2.65E-04    | 1.13E-08   | 1.49E-08 | 0.608284  | 2.65E-05    |
| phe.Fasting_rs73864759 | S8 | CLCN3 | rs185069296 | S15 | "LOC1005056 | 6.48E-12 | 2.65E-04    | 1.13E-08   | 1.49E-08 | 0.608284  | 2.65E-05    |
| phe.Fasting_rs73864759 | S8 | CLCN3 | rs185502834 | S8  | DIAPH1      | 1.12E-12 | 4.56E-05    | 2.25E-09   | 1.98E-09 | 0.080627  | 4.38E-06    |
| phe.Fasting_rs73864759 | S8 | CLCN3 | rs185759881 | S7  | DIAPH1      | 6.48E-12 | 0.000264637 | 1.13E-08   | 1.49E-08 | 0.608284  | 2.65E-05    |
| phe.Fasting_rs73864759 | S8 | CLCN3 | rs186288004 | S21 | "PCDHGB4,PI | 1.42E-05 | 1           | 6.17E-03   | 1.50E-07 | 1         | 0.000204496 |
| phe.Fasting_rs73864759 | S8 | CLCN3 | rs187000011 | S11 | DIAPH1      | 6.48E-12 | 0.000264637 | 1.13E-08   | 1.49E-08 | 0.608284  | 2.65E-05    |
| phe.Fasting_rs73864759 | S8 | CLCN3 | rs188981295 | S5  | "RPS27AP10, | 6.48E-12 | 2.65E-04    | 1.13E-08   | 1.49E-08 | 0.608284  | 2.65E-05    |
| phe.Fasting_rs73864759 | S8 | CLCN3 | rs190559574 | S7  | DIAPH1      | 1.12E-12 | 4.56E-05    | 2.25E-09   | 1.98E-09 | 0.080627  | 4.38E-06    |
| phe.Fasting_rs73864759 | S8 | CLCN3 | rs191544043 | S8  | DIAPH1      | 6.48E-12 | 2.65E-04    | 1.13E-08   | 1.49E-08 | 0.608284  | 2.65E-05    |
| phe.Fasting_rs73864759 | S8 | CLCN3 | rs191766712 | S7  | DIAPH1      | 6.48E-12 | 0.000264637 | 1.13E-08   | 1.49E-08 | 0.608284  | 2.65E-05    |
| phe.Fasting_rs73864759 | S8 | CLCN3 | rs192690040 | S7  | DIAPH1      | 6.48E-12 | 2.65E-04    | 1.13E-08   | 1.49E-08 | 0.608284  | 2.65E-05    |
| phe.Fasting_rs73864759 | S8 | CLCN3 | rs192765219 | S7  | DIAPH1      | 6.48E-12 | 2.65E-04    | 1.13E-08   | 1.49E-08 | 0.608284  | 2.65E-05    |
| phe.Fasting_rs73864759 | S8 | CLCN3 | rs192770525 | S7  | DIAPH1      | 6.48E-12 | 2.65E-04    | 1.13E-08   | 1.49E-08 | 0.608284  | 2.65E-05    |
| phe.Fasting_rs73864759 | S8 | CLCN3 | rs35990401  | S7  | DIAPH1      | 5.98E-12 | 2.44E-04    | 1.05E-08   | 5.60E-09 | 0.227887  | 1.10E-05    |
| phe.Fasting_rs73864759 | S8 | CLCN3 | rs55900860  | S7  | DIAPH1      | 1.12E-12 | 4.56E-05    | 2.25E-09   | 1.98E-09 | 0.080627  | 4.38E-06    |
| phe.Fasting_rs73864759 | S8 | CLCN3 | rs6881310   | S23 | ISL1        | 2.32E-17 | 9.49E-10    | 1.47E-13   | 1.40E-12 | 5.72E-05  | 6.34E-09    |
| phe.Fasting_rs73864759 | S8 | CLCN3 | rs73619637  | S8  | NA          | 5.90E-17 | 2.41E-09    | 2.79E-13   | 1.06E-08 | 0.430916  | 1.95E-05    |
| phe.Fasting_rs73864759 | S8 | CLCN3 | rs77444916  | S23 | LOC642366   | 8.01E-18 | 3.27E-10    | 8.58E-14   | 5.65E-16 | 2.30E-08  | 1.16E-11    |
| phe.Fasting_rs73864759 | S8 | CLCN3 | rs77798597  | S7  | KPNA3       | 1.98E-16 | 8.11E-09    | 6.92E-13   | 1.25E-07 | 1         | 0.000173671 |
| phe.Fasting_rs73864759 | S8 | CLCN3 | rs78703708  | S7  | FAF2        | 2.41E-05 | 1           | 9.81E-03   | 8.99E-08 | 1         | 0.000128715 |
| phe.Fasting_rs73864759 | S8 | CLCN3 | rs78736524  | S5  | KPNA3       | 1.98E-16 | 8.11E-09    | 6.92E-13   | 1.29E-07 | 1         | 0.000178548 |
| phe.Fasting_rs73864759 | S8 | CLCN3 | rs79517926  | S15 | "DIAPH1,LOC | 1.72E-12 | 7.03E-05    | 3.30E-09   | 8.60E-08 | 1         | 0.000123728 |
| phe.Fasting_rs73864759 | S8 | CLCN3 | rs79781495  | S8  | KPNA3       | 1.98E-16 | 8.11E-09    | 6.92E-13   | 1.25E-07 | 1         | 0.000173671 |
| phe.Fasting_rs73864759 | S8 | CLCN3 | rs80258830  | S24 | LOC642366   | 8.01E-18 | 3.27E-10    | 8.58E-14   | 5.65E-16 | 2.30E-08  | 1.16E-11    |
| phe.Fasting_rs73864759 | S8 | CLCN3 | rs80332465  | S5  | KPNA3       | 2.13E-16 | 8.69E-09    | 7.28E-13   | 1.29E-07 | 1         | 0.000178473 |

|                        |     |       |             |     |             |          |          |            |          |             |             |
|------------------------|-----|-------|-------------|-----|-------------|----------|----------|------------|----------|-------------|-------------|
| phe.Fasting_rs73864759 | S8  | CLCN3 | rs80334773  | S5  | KPNA3       | 2.13E-16 | 8.69E-09 | 7.28E-13   | 1.29E-07 | 1           | 0.000178473 |
| phe.Fasting_rs73879173 | S8  | PHC3  | rs111576333 | S5  | TMEM64      | 2.07E-08 | 0.844108 | 1.82E-05   | 2.31E-10 | 0.00941342  | 6.43E-07    |
| phe.Fasting_rs73879173 | S8  | PHC3  | rs112091318 | S5  | TMEM64      | 6.28E-09 | 0.256524 | 6.07E-06   | 3.37E-10 | 0.013698    | 8.96E-07    |
| phe.Fasting_rs73879173 | S8  | PHC3  | rs112348319 | S8  | SPTLC1      | 1.92E-05 | 1.00E+00 | 8.06E-03   | 7.84E-10 | 0.0319139   | 1.93E-06    |
| phe.Fasting_rs73879173 | S8  | PHC3  | rs112608164 | S8  | SPTLC1      | 1.92E-05 | 1.00E+00 | 8.06E-03   | 7.84E-10 | 0.0319139   | 1.93E-06    |
| phe.Fasting_rs73879173 | S8  | PHC3  | rs113568654 | S12 | SPTLC1      | 1.84E-05 | 1        | 0.00776102 | 1.04E-08 | 0.421423    | 1.91E-05    |
| phe.Fasting_rs73879173 | S8  | PHC3  | rs114565620 | S8  | RCL1        | 2.84E-19 | 1.16E-11 | 2.40E-14   | 4.01E-07 | 1           | 4.90E-04    |
| phe.Fasting_rs73879173 | S8  | PHC3  | rs115083290 | S19 | NA          | 8.85E-08 | 1.00E+00 | 6.83E-05   | 3.40E-09 | 0.138522    | 7.12E-06    |
| phe.Fasting_rs73879173 | S8  | PHC3  | rs115752779 | S19 | NA          | 8.85E-08 | 1.00E+00 | 6.83E-05   | 3.40E-09 | 0.138522    | 7.12E-06    |
| phe.Fasting_rs73879173 | S8  | PHC3  | rs115888477 | S8  | NA          | 1.34E-06 | 1.00E+00 | 7.91E-04   | 7.82E-11 | 0.00318365  | 2.44E-07    |
| phe.Fasting_rs73879173 | S8  | PHC3  | rs116011837 | S9  | BRD2        | 2.70E-13 | 1.10E-05 | 5.81E-10   | 2.07E-11 | 0.000841008 | 7.31E-08    |
| phe.Fasting_rs73879173 | S8  | PHC3  | rs116120727 | S9  | BRD2        | 2.70E-13 | 1.10E-05 | 5.81E-10   | 2.07E-11 | 0.000841008 | 7.31E-08    |
| phe.Fasting_rs73879173 | S8  | PHC3  | rs116548615 | S8  | TMEM45B     | 5.29E-19 | 2.16E-11 | 2.49E-14   | 7.92E-10 | 0.0322544   | 1.95E-06    |
| phe.Fasting_rs73879173 | S8  | PHC3  | rs11989304  | S4  | TMEM64      | 2.07E-08 | 8.44E-01 | 1.82E-05   | 2.29E-10 | 0.00932569  | 6.39E-07    |
| phe.Fasting_rs73879173 | S8  | PHC3  | rs140524622 | S7  | MRPL10      | 2.30E-08 | 9.39E-01 | 2.01E-05   | 2.14E-06 | 1           | 0.00219216  |
| phe.Fasting_rs73879173 | S8  | PHC3  | rs141926074 | S8  | ATE1        | 1.23E-19 | 5.04E-12 | 2.23E-14   | 1.34E-11 | 0.000545558 | 4.89E-08    |
| phe.Fasting_rs73879173 | S8  | PHC3  | rs73392640  | S8  | POLR3B      | 6.58E-08 | 1.00E+00 | 5.26E-05   | 8.97E-06 | 1           | 7.47E-03    |
| phe.Fasting_rs73879173 | S8  | PHC3  | rs74627895  | S8  | TMEM64      | 6.28E-09 | 2.57E-01 | 6.07E-06   | 1.27E-06 | 1           | 1.40E-03    |
| phe.Fasting_rs73879173 | S8  | PHC3  | rs75350765  | S5  | RCL1        | 2.84E-19 | 1.16E-11 | 2.40E-14   | 4.01E-07 | 1           | 4.90E-04    |
| phe.Fasting_rs73879173 | S8  | PHC3  | rs75506779  | S5  | TMCO3       | 7.38E-14 | 3.01E-06 | 1.70E-10   | 3.50E-06 | 1           | 0.00334821  |
| phe.Fasting_rs73879173 | S8  | PHC3  | rs75949566  | S5  | TMEM64      | 2.26E-08 | 0.923876 | 1.98E-05   | 3.24E-10 | 0.0132      | 8.70E-07    |
| phe.Fasting_rs73879173 | S8  | PHC3  | rs76542405  | S5  | SPTLC1      | 1.92E-05 | 1        | 8.06E-03   | 7.84E-10 | 0.0319139   | 1.93E-06    |
| phe.Fasting_rs73879173 | S8  | PHC3  | rs77523818  | S7  | SPTLC1      | 1.92E-05 | 1        | 0.00806329 | 7.84E-10 | 0.0319139   | 1.93E-06    |
| phe.Fasting_rs73879173 | S8  | PHC3  | rs7763107   | S8  | FARS2       | 1.30E-09 | 5.33E-02 | 1.41E-06   | 2.87E-06 | 1           | 2.82E-03    |
| phe.Fasting_rs73879173 | S8  | PHC3  | rs77845645  | S21 | NA          | 9.87E-09 | 4.03E-01 | 9.22E-06   | 9.90E-13 | 4.03E-05    | 4.68E-09    |
| phe.Fasting_rs73879173 | S8  | PHC3  | rs78990344  | S2  | LOC10050631 | 2.07E-08 | 0.844108 | 1.82E-05   | 2.29E-10 | 0.00932569  | 6.39E-07    |
| phe.Fasting_rs73879178 | S10 | PHC3  | rs111576333 | S5  | TMEM64      | 3.41E-08 | 1.00E+00 | 2.89E-05   | 8.51E-10 | 0.034621    | 2.05E-06    |
| phe.Fasting_rs73879178 | S10 | PHC3  | rs112091318 | S5  | TMEM64      | 1.01E-08 | 4.12E-01 | 9.40E-06   | 1.27E-09 | 0.0517029   | 2.93E-06    |
| phe.Fasting_rs73879178 | S10 | PHC3  | rs114565620 | S8  | RCL1        | 3.53E-19 | 1.44E-11 | 2.40E-14   | 1.19E-06 | 1           | 0.00132234  |
| phe.Fasting_rs73879178 | S10 | PHC3  | rs115083290 | S19 | NA          | 2.80E-06 | 1.00E+00 | 1.49E-03   | 4.08E-09 | 0.165931    | 8.36E-06    |
| phe.Fasting_rs73879178 | S10 | PHC3  | rs115752779 | S19 | NA          | 2.80E-06 | 1.00E+00 | 1.49E-03   | 4.08E-09 | 0.165931    | 8.36E-06    |
| phe.Fasting_rs73879178 | S10 | PHC3  | rs116011837 | S9  | BRD2        | 4.93E-13 | 2.01E-05 | 1.04E-09   | 2.60E-11 | 0.0010602   | 8.99E-08    |
| phe.Fasting_rs73879178 | S10 | PHC3  | rs116120727 | S9  | BRD2        | 4.93E-13 | 2.01E-05 | 1.04E-09   | 2.60E-11 | 0.0010602   | 8.99E-08    |
| phe.Fasting_rs73879178 | S10 | PHC3  | rs116548615 | S8  | TMEM45B     | 9.13E-09 | 3.73E-01 | 8.60E-06   | 2.32E-09 | 0.0942588   | 5.04E-06    |
| phe.Fasting_rs73879178 | S10 | PHC3  | rs11989304  | S4  | TMEM64      | 3.41E-08 | 1.00E+00 | 2.89E-05   | 8.55E-10 | 0.0347858   | 2.06E-06    |
| phe.Fasting_rs73879178 | S10 | PHC3  | rs140524622 | S7  | MRPL10      | 3.46E-08 | 1.00E+00 | 2.93E-05   | 2.64E-06 | 1           | 2.62E-03    |
| phe.Fasting_rs73879178 | S10 | PHC3  | rs141926074 | S8  | ATE1        | 7.17E-07 | 1.00E+00 | 4.52E-04   | 1.68E-11 | 0.000683787 | 6.02E-08    |
| phe.Fasting_rs73879178 | S10 | PHC3  | rs57287019  | S5  | CLCN3       | 1.13E-05 | 1.00E+00 | 5.11E-03   | 5.28E-06 | 1           | 0.00479294  |
| phe.Fasting_rs73879178 | S10 | PHC3  | rs73392640  | S8  | POLR3B      | 2.93E-06 | 1        | 0.00154951 | 1.05E-05 | 1           | 8.55E-03    |
| phe.Fasting_rs73879178 | S10 | PHC3  | rs74627895  | S8  | TMEM64      | 1.01E-08 | 4.12E-01 | 9.40E-06   | 1.60E-06 | 1           | 0.00170963  |

|                        |     |      |             |     |             |          |           |            |          |             |             |
|------------------------|-----|------|-------------|-----|-------------|----------|-----------|------------|----------|-------------|-------------|
| phe.Fasting_rs73879178 | S10 | PHC3 | rs75350765  | S5  | RCL1        | 3.53E-19 | 1.44E-11  | 2.40E-14   | 1.19E-06 | 1           | 1.32E-03    |
| phe.Fasting_rs73879178 | S10 | PHC3 | rs75949566  | S5  | TMEM64      | 3.74E-08 | 1.00E+00  | 3.15E-05   | 3.93E-10 | 0.015993    | 1.04E-06    |
| phe.Fasting_rs73879178 | S10 | PHC3 | rs7657672   | S8  | CLCN3       | 1.36E-05 | 1.00E+00  | 5.98E-03   | 2.04E-06 | 1           | 2.11E-03    |
| phe.Fasting_rs73879178 | S10 | PHC3 | rs77845645  | S21 | NA          | 7.00E-08 | 1.00E+00  | 5.55E-05   | 1.20E-12 | 4.88E-05    | 5.52E-09    |
| phe.Fasting_rs73879178 | S10 | PHC3 | rs78990344  | S2  | LOC10050631 | 3.41E-08 | 1         | 2.89E-05   | 8.55E-10 | 0.0347858   | 2.06E-06    |
| phe.Fasting_rs73879182 | S6  | PHC3 | rs111576333 | S5  | TMEM64      | 2.07E-08 | 0.844108  | 1.82E-05   | 2.31E-10 | 0.00941342  | 6.43E-07    |
| phe.Fasting_rs73879182 | S6  | PHC3 | rs112091318 | S5  | TMEM64      | 6.28E-09 | 2.57E-01  | 6.07E-06   | 3.37E-10 | 0.013698    | 8.96E-07    |
| phe.Fasting_rs73879182 | S6  | PHC3 | rs112348319 | S8  | SPTLC1      | 1.92E-05 | 1.00E+00  | 8.06E-03   | 7.84E-10 | 0.0319139   | 1.93E-06    |
| phe.Fasting_rs73879182 | S6  | PHC3 | rs112608164 | S8  | SPTLC1      | 1.92E-05 | 1.00E+00  | 8.06E-03   | 7.84E-10 | 0.0319139   | 1.93E-06    |
| phe.Fasting_rs73879182 | S6  | PHC3 | rs113568654 | S12 | SPTLC1      | 1.84E-05 | 1         | 0.00776102 | 1.04E-08 | 0.421423    | 1.91E-05    |
| phe.Fasting_rs73879182 | S6  | PHC3 | rs114565620 | S8  | RCL1        | 2.84E-19 | 1.16E-11  | 2.40E-14   | 4.01E-07 | 1           | 0.000489631 |
| phe.Fasting_rs73879182 | S6  | PHC3 | rs115083290 | S19 | NA          | 8.85E-08 | 1.00E+00  | 6.83E-05   | 3.40E-09 | 0.138522    | 7.12E-06    |
| phe.Fasting_rs73879182 | S6  | PHC3 | rs115752779 | S19 | NA          | 8.85E-08 | 1.00E+00  | 6.83E-05   | 3.40E-09 | 0.138522    | 7.12E-06    |
| phe.Fasting_rs73879182 | S6  | PHC3 | rs115888477 | S8  | NA          | 1.34E-06 | 1.00E+00  | 7.91E-04   | 7.82E-11 | 0.00318365  | 2.44E-07    |
| phe.Fasting_rs73879182 | S6  | PHC3 | rs116011837 | S9  | BRD2        | 2.70E-13 | 1.10E-05  | 5.81E-10   | 2.07E-11 | 0.000841008 | 7.31E-08    |
| phe.Fasting_rs73879182 | S6  | PHC3 | rs116120727 | S9  | BRD2        | 2.70E-13 | 1.10E-05  | 5.81E-10   | 2.07E-11 | 0.000841008 | 7.31E-08    |
| phe.Fasting_rs73879182 | S6  | PHC3 | rs116548615 | S8  | TMEM45B     | 5.29E-19 | 2.16E-11  | 2.49E-14   | 7.92E-10 | 0.0322544   | 1.95E-06    |
| phe.Fasting_rs73879182 | S6  | PHC3 | rs11989304  | S4  | TMEM64      | 2.07E-08 | 0.844108  | 1.82E-05   | 2.29E-10 | 0.00932569  | 6.39E-07    |
| phe.Fasting_rs73879182 | S6  | PHC3 | rs140524622 | S7  | MRPL10      | 2.30E-08 | 0.93902   | 2.01E-05   | 2.14E-06 | 1           | 0.00219216  |
| phe.Fasting_rs73879182 | S6  | PHC3 | rs141926074 | S8  | ATE1        | 1.23E-19 | 5.04E-12  | 2.23E-14   | 1.34E-11 | 0.000545558 | 4.89E-08    |
| phe.Fasting_rs73879182 | S6  | PHC3 | rs73392640  | S8  | POLR3B      | 6.58E-08 | 1         | 5.26E-05   | 8.97E-06 | 1           | 0.00747055  |
| phe.Fasting_rs73879182 | S6  | PHC3 | rs74627895  | S8  | TMEM64      | 6.28E-09 | 0.256524  | 6.07E-06   | 1.27E-06 | 1           | 0.00139909  |
| phe.Fasting_rs73879182 | S6  | PHC3 | rs75350765  | S5  | RCL1        | 2.84E-19 | 1.16E-11  | 2.40E-14   | 4.01E-07 | 1           | 0.000489631 |
| phe.Fasting_rs73879182 | S6  | PHC3 | rs75506779  | S5  | TMCO3       | 7.38E-14 | 3.01E-06  | 1.70E-10   | 3.50E-06 | 1           | 0.00334821  |
| phe.Fasting_rs73879182 | S6  | PHC3 | rs75949566  | S5  | TMEM64      | 2.26E-08 | 0.923876  | 1.98E-05   | 3.24E-10 | 0.0132      | 8.70E-07    |
| phe.Fasting_rs73879182 | S6  | PHC3 | rs76542405  | S5  | SPTLC1      | 1.92E-05 | 1         | 8.06E-03   | 7.84E-10 | 0.0319139   | 1.93E-06    |
| phe.Fasting_rs73879182 | S6  | PHC3 | rs77523818  | S7  | SPTLC1      | 1.92E-05 | 1         | 8.06E-03   | 7.84E-10 | 0.0319139   | 1.93E-06    |
| phe.Fasting_rs73879182 | S6  | PHC3 | rs7763107   | S8  | FARS2       | 1.30E-09 | 0.0532742 | 1.41E-06   | 2.87E-06 | 1           | 0.00281845  |
| phe.Fasting_rs73879182 | S6  | PHC3 | rs77845645  | S21 | NA          | 9.87E-09 | 4.03E-01  | 9.22E-06   | 9.90E-13 | 4.03E-05    | 4.68E-09    |
| phe.Fasting_rs73879182 | S6  | PHC3 | rs78990344  | S2  | LOC10050631 | 2.07E-08 | 8.44E-01  | 1.82E-05   | 2.29E-10 | 0.00932569  | 6.39E-07    |
| phe.Fasting_rs73934476 | S8  | AAK1 | rs114334325 | S7  | AP3M2       | 3.34E-08 | 1         | 2.85E-05   | 8.04E-10 | 0.0327298   | 1.96E-06    |
| phe.Fasting_rs73934476 | S8  | AAK1 | rs114394395 | S7  | AP3M2       | 3.49E-08 | 1.00E+00  | 2.96E-05   | 8.04E-10 | 0.0327298   | 1.96E-06    |
| phe.Fasting_rs73934476 | S8  | AAK1 | rs116406581 | S2  | NA          | 1.90E-07 | 1.00E+00  | 1.36E-04   | 3.84E-11 | 0.00156462  | 1.27E-07    |
| phe.Fasting_rs73934476 | S8  | AAK1 | rs116696844 | S3  | AP3M2       | 4.00E-08 | 1.00E+00  | 3.35E-05   | 8.04E-10 | 0.0327298   | 1.96E-06    |
| phe.Fasting_rs73934476 | S8  | AAK1 | rs138136869 | S7  | DIAPH1      | 2.34E-05 | 1.00E+00  | 9.54E-03   | 2.13E-09 | 0.0865169   | 4.67E-06    |
| phe.Fasting_rs73934476 | S8  | AAK1 | rs138457103 | S10 | DIAPH1      | 2.16E-05 | 1.00E+00  | 8.91E-03   | 8.51E-09 | 0.346282    | 1.61E-05    |
| phe.Fasting_rs73934476 | S8  | AAK1 | rs139403963 | S8  | DIAPH1      | 2.34E-05 | 1.00E+00  | 9.54E-03   | 2.13E-09 | 0.0865169   | 4.67E-06    |
| phe.Fasting_rs73934476 | S8  | AAK1 | rs139828110 | S8  | DIAPH1      | 2.34E-05 | 1         | 9.54E-03   | 2.13E-09 | 0.0865169   | 4.67E-06    |
| phe.Fasting_rs73934476 | S8  | AAK1 | rs142789100 | S8  | DIAPH1      | 2.34E-05 | 1         | 0.0095427  | 2.13E-09 | 0.0865169   | 4.67E-06    |
| phe.Fasting_rs73934476 | S8  | AAK1 | rs142812798 | S7  | DIAPH1      | 2.34E-05 | 1.00E+00  | 9.54E-03   | 2.13E-09 | 0.0865169   | 4.67E-06    |

|                        |    |       |             |     |             |          |          |            |          |             |            |
|------------------------|----|-------|-------------|-----|-------------|----------|----------|------------|----------|-------------|------------|
| phe.Fasting_rs73934476 | S8 | AAK1  | rs143377827 | S13 | "DIAPH1,LOC | 4.02E-06 | 1.00E+00 | 2.05E-03   | 1.25E-09 | 0.0508948   | 2.90E-06   |
| phe.Fasting_rs73934476 | S8 | AAK1  | rs143691978 | S11 | DIAPH1      | 2.34E-05 | 1.00E+00 | 9.54E-03   | 2.14E-09 | 0.0869355   | 4.68E-06   |
| phe.Fasting_rs73934476 | S8 | AAK1  | rs144081334 | S11 | DIAPH1      | 2.34E-05 | 1        | 0.0095427  | 2.14E-09 | 0.0869355   | 4.68E-06   |
| phe.Fasting_rs73934476 | S8 | AAK1  | rs145027704 | S11 | DIAPH1      | 2.34E-05 | 1.00E+00 | 9.54E-03   | 2.14E-09 | 0.0869355   | 4.68E-06   |
| phe.Fasting_rs73934476 | S8 | AAK1  | rs146622060 | S13 | DIAPH1      | 2.34E-05 | 1.00E+00 | 9.54E-03   | 2.14E-09 | 0.0869355   | 4.68E-06   |
| phe.Fasting_rs73934476 | S8 | AAK1  | rs147417996 | S7  | DIAPH1      | 2.34E-05 | 1.00E+00 | 9.54E-03   | 2.14E-09 | 0.0869355   | 4.68E-06   |
| phe.Fasting_rs73934476 | S8 | AAK1  | rs147677041 | S8  | DIAPH1      | 2.34E-05 | 1.00E+00 | 9.54E-03   | 2.13E-09 | 0.0865169   | 4.67E-06   |
| phe.Fasting_rs73934476 | S8 | AAK1  | rs149019627 | S8  | DIAPH1      | 2.34E-05 | 1.00E+00 | 9.54E-03   | 2.13E-09 | 0.0865169   | 4.67E-06   |
| phe.Fasting_rs73934476 | S8 | AAK1  | rs149791570 | S5  | DIAPH1      | 2.34E-05 | 1.00E+00 | 9.54E-03   | 2.13E-09 | 0.0865169   | 4.67E-06   |
| phe.Fasting_rs73934476 | S8 | AAK1  | rs151330468 | S8  | DIAPH1      | 2.34E-05 | 1.00E+00 | 9.54E-03   | 2.14E-09 | 0.0869355   | 4.68E-06   |
| phe.Fasting_rs73934476 | S8 | AAK1  | rs185502834 | S8  | DIAPH1      | 2.34E-05 | 1        | 9.54E-03   | 2.13E-09 | 0.0865169   | 4.67E-06   |
| phe.Fasting_rs73934476 | S8 | AAK1  | rs190559574 | S7  | DIAPH1      | 2.34E-05 | 1        | 9.54E-03   | 2.13E-09 | 0.0865169   | 4.67E-06   |
| phe.Fasting_rs73934476 | S8 | AAK1  | rs55900860  | S7  | DIAPH1      | 2.34E-05 | 1        | 9.54E-03   | 2.13E-09 | 0.0865169   | 4.67E-06   |
| phe.Fasting_rs73934476 | S8 | AAK1  | rs7004597   | S8  | NA          | 3.34E-08 | 1        | 2.85E-05   | 2.47E-10 | 0.0100489   | 6.81E-07   |
| phe.Fasting_rs73934476 | S8 | AAK1  | rs78353402  | S8  | AP3M2       | 3.34E-08 | 1        | 2.85E-05   | 8.04E-10 | 0.0327298   | 1.96E-06   |
| phe.Fasting_rs73934476 | S8 | AAK1  | rs79517926  | S15 | "DIAPH1,LOC | 1.68E-05 | 1        | 0.00713891 | 8.69E-12 | 0.000353841 | 3.26E-08   |
| phe.Fasting_rs7433453  | S5 | VGLL4 | rs112027720 | S7  | DIAPH1      | 4.47E-09 | 1.83E-01 | 4.40E-06   | 1.56E-09 | 0.0634914   | 3.53E-06   |
| phe.Fasting_rs7433453  | S5 | VGLL4 | rs113219478 | S7  | DIAPH1      | 4.47E-09 | 0.182541 | 4.40E-06   | 1.56E-09 | 0.0634914   | 3.53E-06   |
| phe.Fasting_rs7433453  | S5 | VGLL4 | rs115083290 | S19 | NA          | 1.20E-05 | 1        | 5.33E-03   | 1.63E-10 | 0.00662957  | 4.74E-07   |
| phe.Fasting_rs7433453  | S5 | VGLL4 | rs115752779 | S19 | NA          | 1.20E-05 | 1        | 5.33E-03   | 1.63E-10 | 0.00662957  | 4.74E-07   |
| phe.Fasting_rs7433453  | S5 | VGLL4 | rs115888477 | S8  | NA          | 9.71E-08 | 1        | 7.42E-05   | 6.96E-06 | 1           | 0.0060392  |
| phe.Fasting_rs7433453  | S5 | VGLL4 | rs116279995 | S20 | "PCDHGA4,PI | 1.35E-08 | 5.51E-01 | 1.23E-05   | 7.79E-10 | 0.0316907   | 1.92E-06   |
| phe.Fasting_rs7433453  | S5 | VGLL4 | rs138136869 | S7  | DIAPH1      | 9.53E-08 | 1.00E+00 | 7.30E-05   | 1.06E-05 | 1           | 0.00856424 |
| phe.Fasting_rs7433453  | S5 | VGLL4 | rs138457103 | S10 | DIAPH1      | 7.50E-08 | 1        | 5.88E-05   | 3.81E-09 | 0.155026    | 7.84E-06   |
| phe.Fasting_rs7433453  | S5 | VGLL4 | rs138487229 | S11 | DIAPH1      | 4.47E-09 | 1.83E-01 | 4.40E-06   | 1.56E-09 | 0.0634914   | 3.53E-06   |
| phe.Fasting_rs7433453  | S5 | VGLL4 | rs138738950 | S8  | "PCDHGB2,PI | 4.47E-09 | 1.83E-01 | 4.40E-06   | 1.57E-09 | 0.064086    | 3.56E-06   |
| phe.Fasting_rs7433453  | S5 | VGLL4 | rs139297927 | S8  | DIAPH1      | 4.47E-09 | 1.83E-01 | 4.40E-06   | 1.56E-09 | 0.0634914   | 3.53E-06   |
| phe.Fasting_rs7433453  | S5 | VGLL4 | rs139337303 | S8  | DIAPH1      | 4.47E-09 | 1.83E-01 | 4.40E-06   | 1.56E-09 | 0.0634914   | 3.53E-06   |
| phe.Fasting_rs7433453  | S5 | VGLL4 | rs139403963 | S8  | DIAPH1      | 9.53E-08 | 1.00E+00 | 7.30E-05   | 1.06E-05 | 1           | 0.00856424 |
| phe.Fasting_rs7433453  | S5 | VGLL4 | rs139621309 | S18 | "LOC1005056 | 4.47E-09 | 1.83E-01 | 4.40E-06   | 1.56E-09 | 0.0634914   | 3.53E-06   |
| phe.Fasting_rs7433453  | S5 | VGLL4 | rs139828110 | S8  | DIAPH1      | 9.53E-08 | 1        | 7.30E-05   | 1.06E-05 | 1           | 0.00856424 |
| phe.Fasting_rs7433453  | S5 | VGLL4 | rs140070363 | S8  | DIAPH1      | 4.47E-09 | 0.182541 | 4.40E-06   | 1.56E-09 | 0.0634914   | 3.53E-06   |
| phe.Fasting_rs7433453  | S5 | VGLL4 | rs140524622 | S7  | MRPL10      | 2.88E-09 | 1.17E-01 | 2.94E-06   | 3.67E-06 | 1           | 0.00348933 |
| phe.Fasting_rs7433453  | S5 | VGLL4 | rs140644750 | S13 | DIAPH1      | 4.47E-09 | 1.83E-01 | 4.40E-06   | 1.56E-09 | 0.0634914   | 3.53E-06   |
| phe.Fasting_rs7433453  | S5 | VGLL4 | rs141022544 | S8  | DIAPH1      | 4.47E-09 | 1.83E-01 | 4.40E-06   | 1.56E-09 | 0.0634914   | 3.53E-06   |
| phe.Fasting_rs7433453  | S5 | VGLL4 | rs141525984 | S5  | DIAPH1      | 4.47E-09 | 0.182541 | 4.40E-06   | 1.56E-09 | 0.0634914   | 3.53E-06   |
| phe.Fasting_rs7433453  | S5 | VGLL4 | rs141692339 | S3  | "PCDHGA6,PI | 4.67E-10 | 1.91E-02 | 5.36E-07   | 1.20E-09 | 0.0489505   | 2.81E-06   |
| phe.Fasting_rs7433453  | S5 | VGLL4 | rs141926074 | S8  | ATE1        | 1.41E-09 | 5.78E-02 | 1.51E-06   | 2.20E-12 | 8.96E-05    | 9.51E-09   |
| phe.Fasting_rs7433453  | S5 | VGLL4 | rs142480565 | S8  | DIAPH1      | 4.47E-09 | 1.83E-01 | 4.40E-06   | 1.56E-09 | 0.0634914   | 3.53E-06   |
| phe.Fasting_rs7433453  | S5 | VGLL4 | rs142718558 | S7  | "DIAPH1,LOC | 4.47E-09 | 1.83E-01 | 4.40E-06   | 1.56E-09 | 0.0634914   | 3.53E-06   |



|                       |    |       |                |             |          |          |          |          |           |            |
|-----------------------|----|-------|----------------|-------------|----------|----------|----------|----------|-----------|------------|
| phe.Fasting_rs7433453 | S5 | VGLL4 | rs142789100S8  | DIAPH1      | 9.53E-08 | 1.00E+00 | 7.30E-05 | 1.06E-05 | 1         | 0.00856424 |
| phe.Fasting_rs7433453 | S5 | VGLL4 | rs142812798S7  | DIAPH1      | 9.53E-08 | 1.00E+00 | 7.30E-05 | 1.06E-05 | 1         | 0.00856424 |
| phe.Fasting_rs7433453 | S5 | VGLL4 | rs143377827S13 | "DIAPH1,LOC | 7.20E-08 | 1.00E+00 | 5.67E-05 | 3.62E-06 | 1         | 0.00344973 |
| phe.Fasting_rs7433453 | S5 | VGLL4 | rs143691978S11 | DIAPH1      | 9.53E-08 | 1        | 7.30E-05 | 9.64E-06 | 1         | 0.00792659 |
| phe.Fasting_rs7433453 | S5 | VGLL4 | rs144081334S11 | DIAPH1      | 9.53E-08 | 1        | 7.30E-05 | 9.64E-06 | 1         | 0.00792659 |
| phe.Fasting_rs7433453 | S5 | VGLL4 | rs144613910S8  | DIAPH1      | 4.47E-09 | 0.182541 | 4.40E-06 | 1.56E-09 | 0.0634914 | 3.53E-06   |
| phe.Fasting_rs7433453 | S5 | VGLL4 | rs145027704S11 | DIAPH1      | 9.53E-08 | 1        | 7.30E-05 | 9.64E-06 | 1         | 0.00792659 |
| phe.Fasting_rs7433453 | S5 | VGLL4 | rs146220673S7  | DIAPH1      | 4.47E-09 | 0.182541 | 4.40E-06 | 1.56E-09 | 0.0634914 | 3.53E-06   |
| phe.Fasting_rs7433453 | S5 | VGLL4 | rs146622060S13 | DIAPH1      | 9.53E-08 | 1        | 7.30E-05 | 9.64E-06 | 1         | 0.00792659 |
| phe.Fasting_rs7433453 | S5 | VGLL4 | rs146878162S7  | DIAPH1      | 4.47E-09 | 1.83E-01 | 4.40E-06 | 1.56E-09 | 0.0634914 | 3.53E-06   |
| phe.Fasting_rs7433453 | S5 | VGLL4 | rs147314451S8  | DIAPH1      | 4.47E-09 | 0.182541 | 4.40E-06 | 1.56E-09 | 0.0634914 | 3.53E-06   |
| phe.Fasting_rs7433453 | S5 | VGLL4 | rs147417996S7  | DIAPH1      | 9.53E-08 | 1        | 7.30E-05 | 9.64E-06 | 1         | 0.00792659 |
| phe.Fasting_rs7433453 | S5 | VGLL4 | rs147506725S21 | "PCDHGA1,PI | 1.35E-08 | 0.551333 | 1.23E-05 | 7.79E-10 | 0.0316907 | 1.92E-06   |
| phe.Fasting_rs7433453 | S5 | VGLL4 | rs147646948S7  | "LOC1005056 | 4.47E-09 | 0.182541 | 4.40E-06 | 1.56E-09 | 0.0634914 | 3.53E-06   |
| phe.Fasting_rs7433453 | S5 | VGLL4 | rs147677041S8  | DIAPH1      | 9.53E-08 | 1.00E+00 | 7.30E-05 | 1.06E-05 | 1         | 0.00856424 |
| phe.Fasting_rs7433453 | S5 | VGLL4 | rs148116628S7  | DIAPH1      | 4.47E-09 | 1.83E-01 | 4.40E-06 | 1.56E-09 | 0.0634914 | 3.53E-06   |
| phe.Fasting_rs7433453 | S5 | VGLL4 | rs148423011S7  | DIAPH1      | 4.47E-09 | 0.182541 | 4.40E-06 | 1.56E-09 | 0.0634914 | 3.53E-06   |
| phe.Fasting_rs7433453 | S5 | VGLL4 | rs149019627S8  | DIAPH1      | 9.53E-08 | 1.00E+00 | 7.30E-05 | 1.06E-05 | 1         | 8.56E-03   |
| phe.Fasting_rs7433453 | S5 | VGLL4 | rs149075406S8  | DIAPH1      | 4.47E-09 | 1.83E-01 | 4.40E-06 | 1.56E-09 | 0.0634914 | 3.53E-06   |
| phe.Fasting_rs7433453 | S5 | VGLL4 | rs149334783S8  | DIAPH1      | 4.47E-09 | 1.83E-01 | 4.40E-06 | 1.56E-09 | 0.0634914 | 3.53E-06   |
| phe.Fasting_rs7433453 | S5 | VGLL4 | rs149553852S21 | "PCDHGA10,I | 1.35E-08 | 5.51E-01 | 1.23E-05 | 7.79E-10 | 0.0316907 | 1.92E-06   |
| phe.Fasting_rs7433453 | S5 | VGLL4 | rs149716949S5  | DIAPH1      | 2.08E-10 | 8.51E-03 | 2.56E-07 | 2.44E-09 | 0.0994244 | 5.28E-06   |
| phe.Fasting_rs7433453 | S5 | VGLL4 | rs149791570S5  | DIAPH1      | 9.53E-08 | 1.00E+00 | 7.30E-05 | 1.06E-05 | 1         | 0.00856424 |
| phe.Fasting_rs7433453 | S5 | VGLL4 | rs150452206S13 | "DIAPH1,LOC | 4.47E-09 | 0.182541 | 4.40E-06 | 1.56E-09 | 0.0634914 | 3.53E-06   |
| phe.Fasting_rs7433453 | S5 | VGLL4 | rs150675915S7  | DIAPH1      | 4.47E-09 | 0.182541 | 4.40E-06 | 1.56E-09 | 0.0634914 | 3.53E-06   |
| phe.Fasting_rs7433453 | S5 | VGLL4 | rs150765570S7  | DIAPH1      | 4.47E-09 | 1.83E-01 | 4.40E-06 | 1.56E-09 | 0.0634914 | 3.53E-06   |
| phe.Fasting_rs7433453 | S5 | VGLL4 | rs150992994S11 | "PCDHGA5,PI | 4.55E-09 | 1.86E-01 | 4.48E-06 | 1.47E-09 | 0.0598921 | 3.35E-06   |
| phe.Fasting_rs7433453 | S5 | VGLL4 | rs151204700S8  | DIAPH1      | 4.47E-09 | 1.83E-01 | 4.40E-06 | 1.56E-09 | 0.0634914 | 3.53E-06   |
| phe.Fasting_rs7433453 | S5 | VGLL4 | rs151330468S8  | DIAPH1      | 9.53E-08 | 1        | 7.30E-05 | 9.64E-06 | 1         | 0.00792659 |
| phe.Fasting_rs7433453 | S5 | VGLL4 | rs180772028S8  | "DIAPH1,LOC | 4.47E-09 | 1.83E-01 | 4.40E-06 | 1.56E-09 | 0.0634914 | 3.53E-06   |
| phe.Fasting_rs7433453 | S5 | VGLL4 | rs181224861S7  | DIAPH1      | 4.47E-09 | 1.83E-01 | 4.40E-06 | 1.56E-09 | 0.0634914 | 3.53E-06   |
| phe.Fasting_rs7433453 | S5 | VGLL4 | rs181247960S21 | "PCDHGA9,PI | 1.35E-08 | 5.51E-01 | 1.23E-05 | 7.79E-10 | 0.0316907 | 1.92E-06   |
| phe.Fasting_rs7433453 | S5 | VGLL4 | rs181824655S21 | "PCDHGB6,PI | 1.35E-08 | 5.51E-01 | 1.23E-05 | 7.79E-10 | 0.0316907 | 1.92E-06   |
| phe.Fasting_rs7433453 | S5 | VGLL4 | rs182714699S8  | DIAPH1      | 4.47E-09 | 1.83E-01 | 4.40E-06 | 1.56E-09 | 0.0634914 | 3.53E-06   |
| phe.Fasting_rs7433453 | S5 | VGLL4 | rs183597049S7  | DIAPH1      | 4.47E-09 | 1.83E-01 | 4.40E-06 | 1.56E-09 | 0.0634914 | 3.53E-06   |
| phe.Fasting_rs7433453 | S5 | VGLL4 | rs183980988S2  | NA          | 4.47E-09 | 1.83E-01 | 4.40E-06 | 1.56E-09 | 0.0634914 | 3.53E-06   |
| phe.Fasting_rs7433453 | S5 | VGLL4 | rs184233232S7  | DIAPH1      | 4.47E-09 | 0.182541 | 4.40E-06 | 1.56E-09 | 0.0634914 | 3.53E-06   |
| phe.Fasting_rs7433453 | S5 | VGLL4 | rs184509477S13 | "PCDHGB4,PI | 4.47E-09 | 0.182541 | 4.40E-06 | 1.56E-09 | 0.0634914 | 3.53E-06   |
| phe.Fasting_rs7433453 | S5 | VGLL4 | rs185069296S15 | "LOC1005056 | 4.47E-09 | 0.182541 | 4.40E-06 | 1.56E-09 | 0.0634914 | 3.53E-06   |
| phe.Fasting_rs7433453 | S5 | VGLL4 | rs185502834S8  | DIAPH1      | 9.53E-08 | 1        | 7.30E-05 | 1.06E-05 | 1         | 0.00856424 |

|                        |    |        |             |     |             |          |             |             |          |           |             |
|------------------------|----|--------|-------------|-----|-------------|----------|-------------|-------------|----------|-----------|-------------|
| phe.Fasting_rs7433453  | S5 | VGLL4  | rs185759881 | S7  | DIAPH1      | 4.47E-09 | 0.182541    | 4.40E-06    | 1.56E-09 | 0.0634914 | 3.53E-06    |
| phe.Fasting_rs7433453  | S5 | VGLL4  | rs186288044 | S21 | "PCDHGB4,PI | 1.35E-08 | 0.551333    | 1.23E-05    | 7.79E-10 | 0.0316907 | 1.92E-06    |
| phe.Fasting_rs7433453  | S5 | VGLL4  | rs187000011 | S11 | DIAPH1      | 4.47E-09 | 1.83E-01    | 4.40E-06    | 1.56E-09 | 0.0634914 | 3.53E-06    |
| phe.Fasting_rs7433453  | S5 | VGLL4  | rs188981295 | S5  | "RPS27AP10, | 4.47E-09 | 0.182541    | 4.40E-06    | 1.56E-09 | 0.0634914 | 3.53E-06    |
| phe.Fasting_rs7433453  | S5 | VGLL4  | rs190559574 | S7  | DIAPH1      | 9.53E-08 | 1           | 7.30E-05    | 1.06E-05 | 1         | 0.00856424  |
| phe.Fasting_rs7433453  | S5 | VGLL4  | rs191544043 | S8  | DIAPH1      | 4.47E-09 | 0.182541    | 4.40E-06    | 1.56E-09 | 0.0634914 | 3.53E-06    |
| phe.Fasting_rs7433453  | S5 | VGLL4  | rs191766712 | S7  | DIAPH1      | 4.47E-09 | 0.182541    | 4.40E-06    | 1.56E-09 | 0.0634914 | 3.53E-06    |
| phe.Fasting_rs7433453  | S5 | VGLL4  | rs192690040 | S7  | DIAPH1      | 4.47E-09 | 1.83E-01    | 4.40E-06    | 1.56E-09 | 0.0634914 | 3.53E-06    |
| phe.Fasting_rs7433453  | S5 | VGLL4  | rs192765219 | S7  | DIAPH1      | 4.47E-09 | 1.83E-01    | 4.40E-06    | 1.56E-09 | 0.0634914 | 3.53E-06    |
| phe.Fasting_rs7433453  | S5 | VGLL4  | rs192770525 | S7  | DIAPH1      | 4.47E-09 | 0.182541    | 4.40E-06    | 1.56E-09 | 0.0634914 | 3.53E-06    |
| phe.Fasting_rs7433453  | S5 | VGLL4  | rs35990401  | S7  | DIAPH1      | 4.52E-09 | 1.84E-01    | 4.44E-06    | 5.29E-09 | 0.215479  | 1.04E-05    |
| phe.Fasting_rs7433453  | S5 | VGLL4  | rs55900860  | S7  | DIAPH1      | 9.53E-08 | 1.00E+00    | 7.30E-05    | 1.06E-05 | 1         | 0.00856424  |
| phe.Fasting_rs7433453  | S5 | VGLL4  | rs57503635  | S3  | NA          | 6.32E-09 | 2.58E-01    | 6.10E-06    | 1.51E-12 | 6.13E-05  | 6.74E-09    |
| phe.Fasting_rs7433453  | S5 | VGLL4  | rs60011869  | S16 | NA          | 1.24E-05 | 1.00E+00    | 5.51E-03    | 5.69E-08 | 1         | 8.61E-05    |
| phe.Fasting_rs7433453  | S5 | VGLL4  | rs7256517   | S7  | CYTH2       | 3.76E-09 | 1.54E-01    | 3.76E-06    | 5.00E-07 | 1         | 0.000597198 |
| phe.Fasting_rs7433453  | S5 | VGLL4  | rs73283603  | S7  | ZWINT       | 9.08E-06 | 1.00E+00    | 4.20E-03    | 1.59E-07 | 1         | 0.000215143 |
| phe.Fasting_rs7433453  | S5 | VGLL4  | rs75949566  | S5  | TMEM64      | 1.94E-11 | 0.000791096 | 2.89E-08    | 1.83E-06 | 1         | 0.00191542  |
| phe.Fasting_rs7433453  | S5 | VGLL4  | rs79517926  | S15 | "DIAPH1,LOC | 1.02E-08 | 0.417428    | 9.51E-06    | 1.12E-06 | 1         | 1.25E-03    |
| phe.Fasting_rs74627895 | S8 | TMEM64 | rs112348319 | S8  | SPTLC1      | 1.41E-17 | 5.75E-10    | 1.14E-13    | 2.26E-06 | 1         | 0.00230523  |
| phe.Fasting_rs74627895 | S8 | TMEM64 | rs112608164 | S8  | SPTLC1      | 1.41E-17 | 5.75E-10    | 1.14E-13    | 2.26E-06 | 1         | 0.00230523  |
| phe.Fasting_rs74627895 | S8 | TMEM64 | rs113568654 | S12 | SPTLC1      | 1.15E-17 | 4.70E-10    | 1.03E-13    | 1.26E-05 | 1         | 9.73E-03    |
| phe.Fasting_rs74627895 | S8 | TMEM64 | rs115787552 | S5  | KPNA3       | 2.06E-16 | 8.43E-09    | 7.10E-13    | 1.10E-06 | 1         | 0.00122517  |
| phe.Fasting_rs74627895 | S8 | TMEM64 | rs115888477 | S8  | NA          | 1.42E-15 | 5.80E-08    | 4.09E-12    | 2.60E-07 | 1         | 0.000334412 |
| phe.Fasting_rs74627895 | S8 | TMEM64 | rs116079984 | S8  | KPNA3       | 2.06E-16 | 8.43E-09    | 7.10E-13    | 1.32E-06 | 1         | 0.00144712  |
| phe.Fasting_rs74627895 | S8 | TMEM64 | rs141926074 | S8  | ATE1        | 3.18E-18 | 1.30E-10    | 5.41E-14    | 7.60E-06 | 1         | 0.00648791  |
| phe.Fasting_rs74627895 | S8 | TMEM64 | rs146815317 | S5  | KPNA3       | 2.06E-16 | 8.43E-09    | 7.10E-13    | 1.10E-06 | 1         | 0.00122517  |
| phe.Fasting_rs74627895 | S8 | TMEM64 | rs150117838 | S8  | KPNA3       | 2.06E-16 | 8.43E-09    | 7.10E-13    | 1.06E-06 | 1         | 0.00118517  |
| phe.Fasting_rs74627895 | S8 | TMEM64 | rs73283603  | S7  | ZWINT       | 8.87E-17 | 3.62E-09    | 3.84E-13    | 3.70E-09 | 0.150646  | 7.65E-06    |
| phe.Fasting_rs74627895 | S8 | TMEM64 | rs73392640  | S8  | POLR3B      | 9.88E-17 | 4.04E-09    | 4.23E-13    | 1.92E-08 | 0.781827  | 3.31E-05    |
| phe.Fasting_rs74627895 | S8 | TMEM64 | rs74701059  | S24 | C17orf102   | 6.46E-07 | 1           | 4.12E-04    | 1.06E-06 | 1         | 0.00119446  |
| phe.Fasting_rs74627895 | S8 | TMEM64 | rs76542405  | S5  | SPTLC1      | 1.41E-17 | 5.75E-10    | 1.14E-13    | 2.26E-06 | 1         | 0.00230523  |
| phe.Fasting_rs74627895 | S8 | TMEM64 | rs77523818  | S7  | SPTLC1      | 1.41E-17 | 5.75E-10    | 1.14E-13    | 2.26E-06 | 1         | 0.00230523  |
| phe.Fasting_rs74627895 | S8 | TMEM64 | rs77798597  | S7  | KPNA3       | 2.06E-16 | 8.43E-09    | 7.10E-13    | 1.06E-06 | 1         | 0.00118517  |
| phe.Fasting_rs74627895 | S8 | TMEM64 | rs78736524  | S5  | KPNA3       | 2.06E-16 | 8.43E-09    | 7.10E-13    | 1.10E-06 | 1         | 0.00122517  |
| phe.Fasting_rs74627895 | S8 | TMEM64 | rs79703349  | S24 | C17orf102   | 6.46E-07 | 1           | 0.000412414 | 1.36E-06 | 1         | 0.00148446  |
| phe.Fasting_rs74627895 | S8 | TMEM64 | rs79781495  | S8  | KPNA3       | 2.06E-16 | 8.43E-09    | 7.10E-13    | 1.06E-06 | 1         | 0.00118517  |
| phe.Fasting_rs74627895 | S8 | TMEM64 | rs80332465  | S5  | KPNA3       | 2.06E-16 | 8.43E-09    | 7.10E-13    | 1.09E-06 | 1         | 0.00122117  |
| phe.Fasting_rs74627895 | S8 | TMEM64 | rs80334773  | S5  | KPNA3       | 2.06E-16 | 8.43E-09    | 7.10E-13    | 1.09E-06 | 1         | 0.00122117  |
| phe.Fasting_rs74627895 | S8 | TMEM64 | rs8075478   | S8  | MYH10       | 1.17E-17 | 4.79E-10    | 1.04E-13    | 7.21E-07 | 1         | 0.00083741  |
| phe.Fasting_rs74902245 | S5 | LUZP1  | rs112348319 | S8  | SPTLC1      | 2.51E-06 | 1           | 1.36E-03    | 3.77E-07 | 1         | 0.000466052 |

|                        |    |       |             |     |             |          |             |             |          |           |             |
|------------------------|----|-------|-------------|-----|-------------|----------|-------------|-------------|----------|-----------|-------------|
| phe.Fasting_rs74902245 | S5 | LUZP1 | rs112608164 | S8  | SPTLC1      | 2.51E-06 | 1.00E+00    | 1.36E-03    | 3.77E-07 | 1         | 0.000466052 |
| phe.Fasting_rs74902245 | S5 | LUZP1 | rs113568654 | S12 | SPTLC1      | 2.32E-06 | 1.00E+00    | 1.27E-03    | 2.84E-06 | 1         | 0.00279512  |
| phe.Fasting_rs74902245 | S5 | LUZP1 | rs76542405  | S5  | SPTLC1      | 2.51E-06 | 1           | 0.00136058  | 3.77E-07 | 1         | 0.000466052 |
| phe.Fasting_rs74902245 | S5 | LUZP1 | rs77523818  | S7  | SPTLC1      | 2.51E-06 | 1.00E+00    | 1.36E-03    | 3.77E-07 | 1         | 4.66E-04    |
| phe.Fasting_rs74986829 | S8 | NEK1  | rs112027720 | S7  | DIAPH1      | 9.17E-12 | 3.74E-04    | 1.48E-08    | 3.09E-08 | 1         | 4.98E-05    |
| phe.Fasting_rs74986829 | S8 | NEK1  | rs112089881 | S8  | ZFAND4      | 1.84E-18 | 7.51E-11    | 3.89E-14    | 7.39E-09 | 0.300904  | 1.42E-05    |
| phe.Fasting_rs74986829 | S8 | NEK1  | rs113219478 | S7  | DIAPH1      | 9.17E-12 | 3.74E-04    | 1.48E-08    | 3.09E-08 | 1         | 4.98E-05    |
| phe.Fasting_rs74986829 | S8 | NEK1  | rs113357907 | S24 | ISL1        | 6.12E-18 | 2.50E-10    | 7.50E-14    | 1.27E-15 | 5.16E-08  | 1.44E-11    |
| phe.Fasting_rs74986829 | S8 | NEK1  | rs115787552 | S5  | KPNA3       | 3.50E-16 | 1.43E-08    | 1.15E-12    | 3.13E-07 | 1         | 0.000393894 |
| phe.Fasting_rs74986829 | S8 | NEK1  | rs115888477 | S8  | NA          | 2.70E-15 | 1.10E-07    | 7.57E-12    | 2.44E-08 | 0.994402  | 4.03E-05    |
| phe.Fasting_rs74986829 | S8 | NEK1  | rs116011837 | S9  | BRD2        | 2.29E-17 | 9.34E-10    | 1.45E-13    | 3.18E-10 | 0.0129556 | 8.55E-07    |
| phe.Fasting_rs74986829 | S8 | NEK1  | rs116079984 | S8  | KPNA3       | 3.50E-16 | 1.43E-08    | 1.15E-12    | 3.67E-07 | 1         | 0.000454306 |
| phe.Fasting_rs74986829 | S8 | NEK1  | rs116120727 | S9  | BRD2        | 2.29E-17 | 9.34E-10    | 1.45E-13    | 3.18E-10 | 0.0129556 | 8.55E-07    |
| phe.Fasting_rs74986829 | S8 | NEK1  | rs116279995 | S20 | "PCDHGA4,P  | 2.15E-05 | 1.00E+00    | 8.87E-03    | 3.33E-07 | 1         | 0.000415605 |
| phe.Fasting_rs74986829 | S8 | NEK1  | rs138090701 | S5  | HDAC3       | 1.02E-12 | 4.17E-05    | 2.10E-09    | 1.93E-08 | 0.787129  | 3.33E-05    |
| phe.Fasting_rs74986829 | S8 | NEK1  | rs138136869 | S7  | DIAPH1      | 1.65E-12 | 6.74E-05    | 3.16E-09    | 4.45E-09 | 0.180939  | 9.00E-06    |
| phe.Fasting_rs74986829 | S8 | NEK1  | rs138457103 | S10 | DIAPH1      | 5.43E-12 | 0.000221795 | 9.60E-09    | 2.89E-08 | 1         | 4.72E-05    |
| phe.Fasting_rs74986829 | S8 | NEK1  | rs138487229 | S11 | DIAPH1      | 9.17E-12 | 3.74E-04    | 1.48E-08    | 3.09E-08 | 1         | 4.98E-05    |
| phe.Fasting_rs74986829 | S8 | NEK1  | rs138738950 | S8  | "PCDHGB2,P  | 9.17E-12 | 3.74E-04    | 1.48E-08    | 3.08E-08 | 1         | 4.98E-05    |
| phe.Fasting_rs74986829 | S8 | NEK1  | rs139297927 | S8  | DIAPH1      | 9.17E-12 | 0.000374383 | 1.48E-08    | 3.09E-08 | 1         | 4.98E-05    |
| phe.Fasting_rs74986829 | S8 | NEK1  | rs139337303 | S8  | DIAPH1      | 9.17E-12 | 3.74E-04    | 1.48E-08    | 3.09E-08 | 1         | 4.98E-05    |
| phe.Fasting_rs74986829 | S8 | NEK1  | rs139403963 | S8  | DIAPH1      | 1.65E-12 | 6.74E-05    | 3.16E-09    | 4.45E-09 | 0.180939  | 9.00E-06    |
| phe.Fasting_rs74986829 | S8 | NEK1  | rs139621309 | S18 | "LOC100505  | 9.17E-12 | 0.000374383 | 1.48E-08    | 3.09E-08 | 1         | 4.98E-05    |
| phe.Fasting_rs74986829 | S8 | NEK1  | rs139828110 | S8  | DIAPH1      | 1.65E-12 | 6.74E-05    | 3.16E-09    | 4.45E-09 | 0.180939  | 9.00E-06    |
| phe.Fasting_rs74986829 | S8 | NEK1  | rs140070363 | S8  | DIAPH1      | 9.17E-12 | 0.000374383 | 1.48E-08    | 3.09E-08 | 1         | 4.98E-05    |
| phe.Fasting_rs74986829 | S8 | NEK1  | rs140644750 | S13 | DIAPH1      | 9.17E-12 | 3.74E-04    | 1.48E-08    | 3.09E-08 | 1         | 4.98E-05    |
| phe.Fasting_rs74986829 | S8 | NEK1  | rs141022544 | S8  | DIAPH1      | 9.17E-12 | 3.74E-04    | 1.48E-08    | 3.09E-08 | 1         | 4.98E-05    |
| phe.Fasting_rs74986829 | S8 | NEK1  | rs141525984 | S5  | DIAPH1      | 9.17E-12 | 3.74E-04    | 1.48E-08    | 3.09E-08 | 1         | 4.98E-05    |
| phe.Fasting_rs74986829 | S8 | NEK1  | rs141926074 | S8  | ATE1        | 1.33E-06 | 1           | 0.000783423 | 2.84E-14 | 1.16E-06  | 2.14E-10    |
| phe.Fasting_rs74986829 | S8 | NEK1  | rs142480565 | S8  | DIAPH1      | 9.17E-12 | 3.74E-04    | 1.48E-08    | 3.09E-08 | 1         | 4.98E-05    |
| phe.Fasting_rs74986829 | S8 | NEK1  | rs142718558 | S7  | "DIAPH1,LOC | 9.17E-12 | 3.74E-04    | 1.48E-08    | 3.09E-08 | 1         | 4.98E-05    |
| phe.Fasting_rs74986829 | S8 | NEK1  | rs142789100 | S8  | DIAPH1      | 1.65E-12 | 6.74E-05    | 3.16E-09    | 4.45E-09 | 0.180939  | 9.00E-06    |
| phe.Fasting_rs74986829 | S8 | NEK1  | rs142812798 | S7  | DIAPH1      | 1.65E-12 | 6.74E-05    | 3.16E-09    | 4.45E-09 | 0.180939  | 9.00E-06    |
| phe.Fasting_rs74986829 | S8 | NEK1  | rs143377827 | S13 | "DIAPH1,LOC | 1.45E-12 | 5.90E-05    | 2.83E-09    | 3.66E-09 | 0.14914   | 7.58E-06    |
| phe.Fasting_rs74986829 | S8 | NEK1  | rs143691978 | S11 | DIAPH1      | 1.65E-12 | 6.74E-05    | 3.16E-09    | 6.99E-09 | 0.284722  | 1.35E-05    |
| phe.Fasting_rs74986829 | S8 | NEK1  | rs144081334 | S11 | DIAPH1      | 1.65E-12 | 6.74E-05    | 3.16E-09    | 6.99E-09 | 0.284722  | 1.35E-05    |
| phe.Fasting_rs74986829 | S8 | NEK1  | rs144613910 | S8  | DIAPH1      | 9.17E-12 | 0.000374383 | 1.48E-08    | 3.09E-08 | 1         | 4.98E-05    |
| phe.Fasting_rs74986829 | S8 | NEK1  | rs145027704 | S11 | DIAPH1      | 1.65E-12 | 6.74E-05    | 3.16E-09    | 6.99E-09 | 0.284722  | 1.35E-05    |
| phe.Fasting_rs74986829 | S8 | NEK1  | rs146220673 | S7  | DIAPH1      | 9.17E-12 | 0.000374383 | 1.48E-08    | 3.09E-08 | 1         | 4.98E-05    |
| phe.Fasting_rs74986829 | S8 | NEK1  | rs146622060 | S13 | DIAPH1      | 1.65E-12 | 6.74E-05    | 3.16E-09    | 6.99E-09 | 0.284722  | 1.35E-05    |

|                        |    |      |             |     |             |          |             |            |          |           |             |
|------------------------|----|------|-------------|-----|-------------|----------|-------------|------------|----------|-----------|-------------|
| phe.Fasting_rs74986829 | S8 | NEK1 | rs146815317 | S5  | KPNA3       | 3.50E-16 | 1.43E-08    | 1.15E-12   | 3.13E-07 | 1         | 0.000393894 |
| phe.Fasting_rs74986829 | S8 | NEK1 | rs146878162 | S7  | DIAPH1      | 9.17E-12 | 0.000374383 | 1.48E-08   | 3.09E-08 | 1         | 4.98E-05    |
| phe.Fasting_rs74986829 | S8 | NEK1 | rs1470889   | S5  | ZC3H3       | 3.60E-08 | 1.00E+00    | 3.04E-05   | 1.27E-06 | 1         | 0.00139597  |
| phe.Fasting_rs74986829 | S8 | NEK1 | rs1470890   | S5  | ZC3H3       | 3.60E-08 | 1           | 3.04E-05   | 1.27E-06 | 1         | 0.00139597  |
| phe.Fasting_rs74986829 | S8 | NEK1 | rs147314451 | S8  | DIAPH1      | 9.17E-12 | 0.000374383 | 1.48E-08   | 3.09E-08 | 1         | 4.98E-05    |
| phe.Fasting_rs74986829 | S8 | NEK1 | rs147417996 | S7  | DIAPH1      | 1.65E-12 | 6.74E-05    | 3.16E-09   | 6.99E-09 | 0.284722  | 1.35E-05    |
| phe.Fasting_rs74986829 | S8 | NEK1 | rs147506725 | S21 | "PCDHGA1,PI | 2.15E-05 | 1           | 8.87E-03   | 3.33E-07 | 1         | 0.000415605 |
| phe.Fasting_rs74986829 | S8 | NEK1 | rs147646948 | S7  | "LOC1005056 | 9.17E-12 | 3.74E-04    | 1.48E-08   | 3.09E-08 | 1         | 4.98E-05    |
| phe.Fasting_rs74986829 | S8 | NEK1 | rs147677041 | S8  | DIAPH1      | 1.65E-12 | 6.74E-05    | 3.16E-09   | 4.45E-09 | 0.180939  | 9.00E-06    |
| phe.Fasting_rs74986829 | S8 | NEK1 | rs148116628 | S7  | DIAPH1      | 9.17E-12 | 0.000374383 | 1.48E-08   | 3.09E-08 | 1         | 4.98E-05    |
| phe.Fasting_rs74986829 | S8 | NEK1 | rs148423011 | S7  | DIAPH1      | 9.17E-12 | 3.74E-04    | 1.48E-08   | 3.09E-08 | 1         | 4.98E-05    |
| phe.Fasting_rs74986829 | S8 | NEK1 | rs149019627 | S8  | DIAPH1      | 1.65E-12 | 6.74E-05    | 3.16E-09   | 4.45E-09 | 0.180939  | 9.00E-06    |
| phe.Fasting_rs74986829 | S8 | NEK1 | rs149075406 | S8  | DIAPH1      | 9.17E-12 | 3.74E-04    | 1.48E-08   | 3.09E-08 | 1         | 4.98E-05    |
| phe.Fasting_rs74986829 | S8 | NEK1 | rs149334783 | S8  | DIAPH1      | 9.17E-12 | 3.74E-04    | 1.48E-08   | 3.09E-08 | 1         | 4.98E-05    |
| phe.Fasting_rs74986829 | S8 | NEK1 | rs149553852 | S21 | "PCDHGA10,  | 2.15E-05 | 1.00E+00    | 8.87E-03   | 3.33E-07 | 1         | 0.000415605 |
| phe.Fasting_rs74986829 | S8 | NEK1 | rs149716949 | S5  | DIAPH1      | 7.67E-13 | 3.13E-05    | 1.59E-09   | 3.86E-09 | 0.15716   | 7.94E-06    |
| phe.Fasting_rs74986829 | S8 | NEK1 | rs149791570 | S5  | DIAPH1      | 1.65E-12 | 6.74E-05    | 3.16E-09   | 4.45E-09 | 0.180939  | 9.00E-06    |
| phe.Fasting_rs74986829 | S8 | NEK1 | rs150117838 | S8  | KPNA3       | 3.50E-16 | 1.43E-08    | 1.15E-12   | 3.00E-07 | 1         | 0.000378616 |
| phe.Fasting_rs74986829 | S8 | NEK1 | rs150452206 | S13 | "DIAPH1,LOC | 9.17E-12 | 3.74E-04    | 1.48E-08   | 3.09E-08 | 1         | 4.98E-05    |
| phe.Fasting_rs74986829 | S8 | NEK1 | rs150675915 | S7  | DIAPH1      | 9.17E-12 | 3.74E-04    | 1.48E-08   | 3.09E-08 | 1         | 4.98E-05    |
| phe.Fasting_rs74986829 | S8 | NEK1 | rs150765570 | S7  | DIAPH1      | 9.17E-12 | 3.74E-04    | 1.48E-08   | 3.09E-08 | 1         | 4.98E-05    |
| phe.Fasting_rs74986829 | S8 | NEK1 | rs150992994 | S11 | "PCDHGA5,PI | 9.47E-12 | 3.87E-04    | 1.52E-08   | 2.95E-08 | 1         | 4.80E-05    |
| phe.Fasting_rs74986829 | S8 | NEK1 | rs151204700 | S8  | DIAPH1      | 9.17E-12 | 0.000374383 | 1.48E-08   | 3.09E-08 | 1         | 4.98E-05    |
| phe.Fasting_rs74986829 | S8 | NEK1 | rs151330468 | S8  | DIAPH1      | 1.65E-12 | 6.74E-05    | 3.16E-09   | 6.99E-09 | 0.284722  | 1.35E-05    |
| phe.Fasting_rs74986829 | S8 | NEK1 | rs16894241  | S4  | HIST1H2BK   | 5.24E-08 | 1.00E+00    | 4.28E-05   | 6.75E-07 | 1         | 0.000789743 |
| phe.Fasting_rs74986829 | S8 | NEK1 | rs180772028 | S8  | "DIAPH1,LOC | 9.17E-12 | 0.000374383 | 1.48E-08   | 3.09E-08 | 1         | 4.98E-05    |
| phe.Fasting_rs74986829 | S8 | NEK1 | rs181224861 | S7  | DIAPH1      | 9.17E-12 | 0.000374383 | 1.48E-08   | 3.09E-08 | 1         | 4.98E-05    |
| phe.Fasting_rs74986829 | S8 | NEK1 | rs181247960 | S21 | "PCDHGA9,PI | 2.15E-05 | 1.00E+00    | 8.87E-03   | 3.33E-07 | 1         | 0.000415605 |
| phe.Fasting_rs74986829 | S8 | NEK1 | rs181824655 | S21 | "PCDHGB6,PI | 2.15E-05 | 1.00E+00    | 8.87E-03   | 3.33E-07 | 1         | 0.000415605 |
| phe.Fasting_rs74986829 | S8 | NEK1 | rs182714699 | S8  | DIAPH1      | 9.17E-12 | 3.74E-04    | 1.48E-08   | 3.09E-08 | 1         | 4.98E-05    |
| phe.Fasting_rs74986829 | S8 | NEK1 | rs182965141 | S8  | DIAPH1      | 2.01E-12 | 8.19E-05    | 3.80E-09   | 2.45E-09 | 0.0995578 | 5.28E-06    |
| phe.Fasting_rs74986829 | S8 | NEK1 | rs183597049 | S7  | DIAPH1      | 9.17E-12 | 3.74E-04    | 1.48E-08   | 3.09E-08 | 1         | 4.98E-05    |
| phe.Fasting_rs74986829 | S8 | NEK1 | rs183980988 | S2  | NA          | 9.17E-12 | 0.000374383 | 1.48E-08   | 3.09E-08 | 1         | 4.98E-05    |
| phe.Fasting_rs74986829 | S8 | NEK1 | rs184233232 | S7  | DIAPH1      | 9.17E-12 | 0.000374383 | 1.48E-08   | 3.09E-08 | 1         | 4.98E-05    |
| phe.Fasting_rs74986829 | S8 | NEK1 | rs184509477 | S13 | "PCDHGB4,PI | 9.17E-12 | 0.000374383 | 1.48E-08   | 3.09E-08 | 1         | 4.98E-05    |
| phe.Fasting_rs74986829 | S8 | NEK1 | rs185069296 | S15 | "LOC1005056 | 9.17E-12 | 3.74E-04    | 1.48E-08   | 3.09E-08 | 1         | 4.98E-05    |
| phe.Fasting_rs74986829 | S8 | NEK1 | rs185502834 | S8  | DIAPH1      | 1.65E-12 | 6.74E-05    | 3.16E-09   | 4.45E-09 | 0.180939  | 9.00E-06    |
| phe.Fasting_rs74986829 | S8 | NEK1 | rs185759881 | S7  | DIAPH1      | 9.17E-12 | 3.74E-04    | 1.48E-08   | 3.09E-08 | 1         | 4.98E-05    |
| phe.Fasting_rs74986829 | S8 | NEK1 | rs186288044 | S21 | "PCDHGB4,PI | 2.15E-05 | 1           | 0.00887266 | 3.33E-07 | 1         | 0.000415605 |
| phe.Fasting_rs74986829 | S8 | NEK1 | rs187000011 | S11 | DIAPH1      | 9.17E-12 | 3.74E-04    | 1.48E-08   | 3.09E-08 | 1         | 4.98E-05    |

|                        |    |      |             |     |             |          |             |          |          |             |             |
|------------------------|----|------|-------------|-----|-------------|----------|-------------|----------|----------|-------------|-------------|
| phe.Fasting_rs74986829 | S8 | NEK1 | rs188981295 | S5  | "RPS27AP10, | 9.17E-12 | 3.74E-04    | 1.48E-08 | 3.09E-08 | 1           | 4.98E-05    |
| phe.Fasting_rs74986829 | S8 | NEK1 | rs190559574 | S7  | DIAPH1      | 1.65E-12 | 6.74E-05    | 3.16E-09 | 4.45E-09 | 0.180939    | 9.00E-06    |
| phe.Fasting_rs74986829 | S8 | NEK1 | rs191544043 | S8  | DIAPH1      | 9.17E-12 | 3.74E-04    | 1.48E-08 | 3.09E-08 | 1           | 4.98E-05    |
| phe.Fasting_rs74986829 | S8 | NEK1 | rs191766712 | S7  | DIAPH1      | 9.17E-12 | 3.74E-04    | 1.48E-08 | 3.09E-08 | 1           | 4.98E-05    |
| phe.Fasting_rs74986829 | S8 | NEK1 | rs192690040 | S7  | DIAPH1      | 9.17E-12 | 3.74E-04    | 1.48E-08 | 3.09E-08 | 1           | 4.98E-05    |
| phe.Fasting_rs74986829 | S8 | NEK1 | rs192765219 | S7  | DIAPH1      | 9.17E-12 | 3.74E-04    | 1.48E-08 | 3.09E-08 | 1           | 4.98E-05    |
| phe.Fasting_rs74986829 | S8 | NEK1 | rs192770525 | S7  | DIAPH1      | 9.17E-12 | 0.000374383 | 1.48E-08 | 3.09E-08 | 1           | 4.98E-05    |
| phe.Fasting_rs74986829 | S8 | NEK1 | rs2924507   | S5  | ZC3H3       | 3.60E-08 | 1           | 3.04E-05 | 1.27E-06 | 1           | 0.00139597  |
| phe.Fasting_rs74986829 | S8 | NEK1 | rs2924508   | S8  | ZC3H3       | 3.60E-08 | 1           | 3.04E-05 | 1.77E-06 | 1           | 0.00186217  |
| phe.Fasting_rs74986829 | S8 | NEK1 | rs2924511   | S7  | ZC3H3       | 3.60E-08 | 1           | 3.04E-05 | 1.08E-06 | 1           | 0.00121176  |
| phe.Fasting_rs74986829 | S8 | NEK1 | rs2924512   | S7  | ZC3H3       | 4.02E-08 | 1           | 3.37E-05 | 1.35E-06 | 1           | 0.00147188  |
| phe.Fasting_rs74986829 | S8 | NEK1 | rs2956376   | S8  | ZC3H3       | 3.60E-08 | 1           | 3.04E-05 | 7.36E-07 | 1           | 0.000853057 |
| phe.Fasting_rs74986829 | S8 | NEK1 | rs2980270   | S7  | ZC3H3       | 3.60E-08 | 1.00E+00    | 3.04E-05 | 7.36E-07 | 1           | 0.000853057 |
| phe.Fasting_rs74986829 | S8 | NEK1 | rs2980272   | S7  | ZC3H3       | 4.02E-08 | 1           | 3.37E-05 | 1.41E-06 | 1           | 0.00153088  |
| phe.Fasting_rs74986829 | S8 | NEK1 | rs2980275   | S5  | ZC3H3       | 3.60E-08 | 1           | 3.04E-05 | 1.27E-06 | 1           | 0.00139597  |
| phe.Fasting_rs74986829 | S8 | NEK1 | rs35990401  | S7  | DIAPH1      | 8.40E-12 | 0.000343123 | 1.39E-08 | 1.16E-08 | 0.474122    | 2.13E-05    |
| phe.Fasting_rs74986829 | S8 | NEK1 | rs366767    | S5  | ZC3H3       | 6.34E-08 | 1           | 5.08E-05 | 7.89E-07 | 1           | 0.000909793 |
| phe.Fasting_rs74986829 | S8 | NEK1 | rs55900860  | S7  | DIAPH1      | 1.65E-12 | 6.74E-05    | 3.16E-09 | 4.45E-09 | 0.180939    | 9.00E-06    |
| phe.Fasting_rs74986829 | S8 | NEK1 | rs6881310   | S23 | ISL1        | 4.23E-17 | 1.73E-09    | 2.22E-13 | 3.40E-12 | 0.000138444 | 1.43E-08    |
| phe.Fasting_rs74986829 | S8 | NEK1 | rs73619637  | S8  | NA          | 1.02E-16 | 4.15E-09    | 4.31E-13 | 1.80E-08 | 0.733806    | 3.14E-05    |
| phe.Fasting_rs74986829 | S8 | NEK1 | rs77444916  | S23 | LOC642366   | 1.50E-17 | 6.11E-10    | 1.18E-13 | 1.19E-15 | 4.84E-08    | 1.36E-11    |
| phe.Fasting_rs74986829 | S8 | NEK1 | rs77798597  | S7  | KPNA3       | 3.50E-16 | 1.43E-08    | 1.15E-12 | 3.00E-07 | 1           | 0.000378616 |
| phe.Fasting_rs74986829 | S8 | NEK1 | rs78703708  | S7  | FAF2        | 9.25E-18 | 3.78E-10    | 9.24E-14 | 4.64E-07 | 1           | 0.000558314 |
| phe.Fasting_rs74986829 | S8 | NEK1 | rs78736524  | S5  | KPNA3       | 3.50E-16 | 1.43E-08    | 1.15E-12 | 3.13E-07 | 1           | 0.000393894 |
| phe.Fasting_rs74986829 | S8 | NEK1 | rs79517926  | S15 | "DIAPH1,LOC | 2.69E-12 | 1.10E-04    | 4.97E-09 | 3.36E-09 | 0.136596    | 7.04E-06    |
| phe.Fasting_rs74986829 | S8 | NEK1 | rs79781495  | S8  | KPNA3       | 3.50E-16 | 1.43E-08    | 1.15E-12 | 3.00E-07 | 1           | 0.000378616 |
| phe.Fasting_rs74986829 | S8 | NEK1 | rs80258830  | S24 | LOC642366   | 1.50E-17 | 6.11E-10    | 1.18E-13 | 1.19E-15 | 4.84E-08    | 1.36E-11    |
| phe.Fasting_rs74986829 | S8 | NEK1 | rs80332465  | S5  | KPNA3       | 3.75E-16 | 1.53E-08    | 1.22E-12 | 3.13E-07 | 1           | 3.93E-04    |
| phe.Fasting_rs74986829 | S8 | NEK1 | rs80334773  | S5  | KPNA3       | 3.75E-16 | 1.53E-08    | 1.22E-12 | 3.13E-07 | 1           | 0.000393227 |
| phe.Fasting_rs75350765 | S5 | RCL1 | rs112009962 | S8  | NA          | 6.93E-06 | 1.00E+00    | 3.33E-03 | 1.37E-15 | 5.56E-08    | 1.54E-11    |
| phe.Fasting_rs75350765 | S5 | RCL1 | rs112089881 | S8  | ZFAND4      | 9.81E-19 | 4.01E-11    | 2.92E-14 | 8.31E-10 | 0.0338366   | 2.02E-06    |
| phe.Fasting_rs75350765 | S5 | RCL1 | rs115083290 | S19 | NA          | 2.89E-17 | 1.18E-09    | 1.66E-13 | 3.20E-14 | 1.30E-06    | 2.35E-10    |
| phe.Fasting_rs75350765 | S5 | RCL1 | rs115752779 | S19 | NA          | 2.89E-17 | 1.18E-09    | 1.66E-13 | 3.20E-14 | 1.30E-06    | 2.35E-10    |
| phe.Fasting_rs75350765 | S5 | RCL1 | rs12581352  | S2  | NA          | 1.21E-05 | 1.00E+00    | 5.40E-03 | 1.49E-15 | 6.06E-08    | 1.66E-11    |
| phe.Fasting_rs75350765 | S5 | RCL1 | rs139070959 | S8  | RPN2        | 5.03E-18 | 2.06E-10    | 6.86E-14 | 9.04E-15 | 3.68E-07    | 7.90E-11    |
| phe.Fasting_rs75350765 | S5 | RCL1 | rs141926074 | S8  | ATE1        | 5.29E-19 | 2.16E-11    | 2.49E-14 | 9.87E-09 | 0.401804    | 1.84E-05    |
| phe.Fasting_rs75350765 | S5 | RCL1 | rs145412529 | S8  | "RBL1,RPS3A | 2.94E-18 | 1.20E-10    | 5.06E-14 | 1.03E-14 | 4.19E-07    | 8.92E-11    |
| phe.Fasting_rs75350765 | S5 | RCL1 | rs2153597   | S8  | ZNF438      | 1.03E-11 | 4.20E-04    | 1.63E-08 | 3.10E-10 | 0.0126381   | 8.36E-07    |
| phe.Fasting_rs75350765 | S5 | RCL1 | rs56398234  | S8  | LRCH1       | 1.31E-05 | 1.00E+00    | 5.77E-03 | 8.26E-07 | 1           | 0.000948327 |
| phe.Fasting_rs75350765 | S5 | RCL1 | rs57503635  | S3  | NA          | 4.19E-17 | 1.71E-09    | 2.22E-13 | 1.28E-21 | 5.23E-14    | 4.02E-15    |

|                        |    |       |             |     |             |          |          |             |          |             |             |
|------------------------|----|-------|-------------|-----|-------------|----------|----------|-------------|----------|-------------|-------------|
| phe.Fasting_rs75350765 | S5 | RCL1  | rs7256517   | S7  | CYTH2       | 1.74E-16 | 7.10E-09 | 6.18E-13    | 1.53E-07 | 1           | 0.000207616 |
| phe.Fasting_rs75350765 | S5 | RCL1  | rs73283603  | S7  | ZWINT       | 5.69E-17 | 2.32E-09 | 2.72E-13    | 5.34E-07 | 1           | 0.000635189 |
| phe.Fasting_rs75350765 | S5 | RCL1  | rs73392640  | S8  | POLR3B      | 1.04E-07 | 1        | 7.92E-05    | 9.18E-08 | 1           | 0.000131042 |
| phe.Fasting_rs75350765 | S5 | RCL1  | rs73619637  | S8  | NA          | 5.38E-17 | 2.20E-09 | 2.63E-13    | 4.57E-11 | 0.00185897  | 1.49E-07    |
| phe.Fasting_rs75350765 | S5 | RCL1  | rs75374128  | S5  | CNTLN       | 2.86E-18 | 1.17E-10 | 4.97E-14    | 1.17E-09 | 0.0477188   | 2.75E-06    |
| phe.Fasting_rs75350765 | S5 | RCL1  | rs75506779  | S5  | TMCO3       | 1.24E-07 | 1.00E+00 | 9.24E-05    | 2.68E-06 | 1           | 0.00265052  |
| phe.Fasting_rs75350765 | S5 | RCL1  | rs75864203  | S8  | CNTLN       | 2.86E-18 | 1.17E-10 | 4.97E-14    | 1.17E-09 | 0.0477188   | 2.75E-06    |
| phe.Fasting_rs75350765 | S5 | RCL1  | rs76844308  | S8  | CNTLN       | 5.35E-18 | 2.19E-10 | 7.01E-14    | 8.63E-10 | 0.0351142   | 2.08E-06    |
| phe.Fasting_rs75350765 | S5 | RCL1  | rs78722272  | S5  | CNTLN       | 2.86E-18 | 1.17E-10 | 4.97E-14    | 1.24E-09 | 0.050489    | 2.89E-06    |
| phe.Fasting_rs75374128 | S5 | CNTLN | rs115083290 | S19 | NA          | 3.88E-09 | 0.158556 | 3.87E-06    | 5.72E-17 | 2.33E-09    | 4.07E-12    |
| phe.Fasting_rs75374128 | S5 | CNTLN | rs115752779 | S19 | NA          | 3.88E-09 | 1.59E-01 | 3.87E-06    | 5.72E-17 | 2.33E-09    | 4.07E-12    |
| phe.Fasting_rs75374128 | S5 | CNTLN | rs139070959 | S8  | RPN2        | 1.05E-17 | 4.28E-10 | 9.93E-14    | 3.36E-12 | 0.000136888 | 1.42E-08    |
| phe.Fasting_rs75374128 | S5 | CNTLN | rs145412529 | S8  | "RBL1,RPS3A | 5.93E-18 | 2.42E-10 | 7.36E-14    | 4.01E-10 | 0.0163221   | 1.06E-06    |
| phe.Fasting_rs75374128 | S5 | CNTLN | rs57503635  | S3  | NA          | 1.70E-06 | 1.00E+00 | 9.73E-04    | 8.28E-16 | 3.37E-08    | 1.16E-11    |
| phe.Fasting_rs75374128 | S5 | CNTLN | rs78516788  | S8  | SLC38A1     | 7.72E-18 | 3.15E-10 | 8.50E-14    | 3.24E-07 | 1           | 0.000405956 |
| phe.Fasting_rs7546605  | S8 | ZZZ3  | rs116011837 | S9  | BRD2        | 1.53E-07 | 1.00E+00 | 1.12E-04    | 1.31E-07 | 1           | 0.000180742 |
| phe.Fasting_rs7546605  | S8 | ZZZ3  | rs116120727 | S9  | BRD2        | 1.53E-07 | 1.00E+00 | 1.12E-04    | 1.31E-07 | 1           | 0.000180742 |
| phe.Fasting_rs75506779 | S5 | TMCO3 | rs57503635  | S3  | NA          | 8.27E-07 | 1.00E+00 | 5.12E-04    | 4.95E-06 | 1           | 0.00453056  |
| phe.Fasting_rs7571183  | S8 | MTX2  | rs112027720 | S7  | DIAPH1      | 1.38E-07 | 1.00E+00 | 1.01E-04    | 2.77E-06 | 1           | 0.00273035  |
| phe.Fasting_rs7571183  | S8 | MTX2  | rs113219478 | S7  | DIAPH1      | 1.38E-07 | 1        | 1.01E-04    | 2.77E-06 | 1           | 0.00273035  |
| phe.Fasting_rs7571183  | S8 | MTX2  | rs116011837 | S9  | BRD2        | 1.57E-05 | 1.00E+00 | 6.75E-03    | 6.50E-06 | 1           | 0.00570412  |
| phe.Fasting_rs7571183  | S8 | MTX2  | rs116120727 | S9  | BRD2        | 1.57E-05 | 1.00E+00 | 6.75E-03    | 6.50E-06 | 1           | 0.00570412  |
| phe.Fasting_rs7571183  | S8 | MTX2  | rs138487229 | S11 | DIAPH1      | 1.38E-07 | 1.00E+00 | 1.01E-04    | 2.77E-06 | 1           | 2.73E-03    |
| phe.Fasting_rs7571183  | S8 | MTX2  | rs138738950 | S8  | "PCDHGB2,Pi | 1.38E-07 | 1.00E+00 | 1.01E-04    | 2.71E-06 | 1           | 0.00267721  |
| phe.Fasting_rs7571183  | S8 | MTX2  | rs139297927 | S8  | DIAPH1      | 1.38E-07 | 1.00E+00 | 1.01E-04    | 2.77E-06 | 1           | 0.00273035  |
| phe.Fasting_rs7571183  | S8 | MTX2  | rs139337303 | S8  | DIAPH1      | 1.38E-07 | 1.00E+00 | 1.01E-04    | 2.77E-06 | 1           | 0.00273035  |
| phe.Fasting_rs7571183  | S8 | MTX2  | rs139621309 | S18 | "LOC1005050 | 1.38E-07 | 1        | 0.000101426 | 2.77E-06 | 1           | 0.00273035  |
| phe.Fasting_rs7571183  | S8 | MTX2  | rs140070363 | S8  | DIAPH1      | 1.38E-07 | 1.00E+00 | 1.01E-04    | 2.77E-06 | 1           | 0.00273035  |
| phe.Fasting_rs7571183  | S8 | MTX2  | rs140644750 | S13 | DIAPH1      | 1.38E-07 | 1.00E+00 | 1.01E-04    | 2.77E-06 | 1           | 2.73E-03    |
| phe.Fasting_rs7571183  | S8 | MTX2  | rs141022544 | S8  | DIAPH1      | 1.38E-07 | 1        | 0.000101426 | 2.77E-06 | 1           | 2.73E-03    |
| phe.Fasting_rs7571183  | S8 | MTX2  | rs141525984 | S5  | DIAPH1      | 1.38E-07 | 1.00E+00 | 1.01E-04    | 2.77E-06 | 1           | 2.73E-03    |
| phe.Fasting_rs7571183  | S8 | MTX2  | rs142480565 | S8  | DIAPH1      | 1.38E-07 | 1.00E+00 | 1.01E-04    | 2.77E-06 | 1           | 0.00273035  |
| phe.Fasting_rs7571183  | S8 | MTX2  | rs142718558 | S7  | "DIAPH1,LOC | 1.38E-07 | 1        | 1.01E-04    | 2.77E-06 | 1           | 0.00273035  |
| phe.Fasting_rs7571183  | S8 | MTX2  | rs144613910 | S8  | DIAPH1      | 1.38E-07 | 1        | 0.000101426 | 2.77E-06 | 1           | 0.00273035  |
| phe.Fasting_rs7571183  | S8 | MTX2  | rs146220673 | S7  | DIAPH1      | 1.38E-07 | 1.00E+00 | 1.01E-04    | 2.77E-06 | 1           | 0.00273035  |
| phe.Fasting_rs7571183  | S8 | MTX2  | rs146878162 | S7  | DIAPH1      | 1.38E-07 | 1        | 0.000101426 | 2.77E-06 | 1           | 0.00273035  |
| phe.Fasting_rs7571183  | S8 | MTX2  | rs147314451 | S8  | DIAPH1      | 1.38E-07 | 1.00E+00 | 1.01E-04    | 2.77E-06 | 1           | 0.00273035  |
| phe.Fasting_rs7571183  | S8 | MTX2  | rs147646948 | S7  | "LOC1005050 | 1.38E-07 | 1.00E+00 | 1.01E-04    | 2.77E-06 | 1           | 0.00273035  |
| phe.Fasting_rs7571183  | S8 | MTX2  | rs148116628 | S7  | DIAPH1      | 1.38E-07 | 1        | 0.000101426 | 2.77E-06 | 1           | 2.73E-03    |
| phe.Fasting_rs7571183  | S8 | MTX2  | rs148423011 | S7  | DIAPH1      | 1.38E-07 | 1.00E+00 | 1.01E-04    | 2.77E-06 | 1           | 0.00273035  |

|                        |     |        |                 |             |          |          |             |          |             |             |
|------------------------|-----|--------|-----------------|-------------|----------|----------|-------------|----------|-------------|-------------|
| phe.Fasting_rs7571183  | S8  | MTX2   | rs149075406 S8  | DIAPH1      | 1.38E-07 | 1.00E+00 | 1.01E-04    | 2.77E-06 | 1           | 0.00273035  |
| phe.Fasting_rs7571183  | S8  | MTX2   | rs149334783 S8  | DIAPH1      | 1.38E-07 | 1.00E+00 | 1.01E-04    | 2.77E-06 | 1           | 2.73E-03    |
| phe.Fasting_rs7571183  | S8  | MTX2   | rs149716949 S5  | DIAPH1      | 5.67E-08 | 1        | 4.59E-05    | 5.59E-07 | 1           | 0.000662283 |
| phe.Fasting_rs7571183  | S8  | MTX2   | rs150452206 S13 | "DIAPH1,LOC | 1.38E-07 | 1.00E+00 | 1.01E-04    | 2.77E-06 | 1           | 0.00273035  |
| phe.Fasting_rs7571183  | S8  | MTX2   | rs150675915 S7  | DIAPH1      | 1.38E-07 | 1.00E+00 | 1.01E-04    | 2.77E-06 | 1           | 0.00273035  |
| phe.Fasting_rs7571183  | S8  | MTX2   | rs150765570 S7  | DIAPH1      | 1.38E-07 | 1.00E+00 | 1.01E-04    | 2.77E-06 | 1           | 0.00273035  |
| phe.Fasting_rs7571183  | S8  | MTX2   | rs150992994 S11 | "PCDHGA5,PI | 1.41E-07 | 1.00E+00 | 1.03E-04    | 3.33E-07 | 1           | 0.000415339 |
| phe.Fasting_rs7571183  | S8  | MTX2   | rs151204700 S8  | DIAPH1      | 1.38E-07 | 1.00E+00 | 1.01E-04    | 2.77E-06 | 1           | 0.00273035  |
| phe.Fasting_rs7571183  | S8  | MTX2   | rs180772028 S8  | "DIAPH1,LOC | 1.38E-07 | 1.00E+00 | 1.01E-04    | 2.77E-06 | 1           | 0.00273035  |
| phe.Fasting_rs7571183  | S8  | MTX2   | rs181224861 S7  | DIAPH1      | 1.38E-07 | 1.00E+00 | 1.01E-04    | 2.77E-06 | 1           | 0.00273035  |
| phe.Fasting_rs7571183  | S8  | MTX2   | rs182714699 S8  | DIAPH1      | 1.38E-07 | 1        | 1.01E-04    | 2.77E-06 | 1           | 0.00273035  |
| phe.Fasting_rs7571183  | S8  | MTX2   | rs183597049 S7  | DIAPH1      | 1.38E-07 | 1        | 1.01E-04    | 2.77E-06 | 1           | 0.00273035  |
| phe.Fasting_rs7571183  | S8  | MTX2   | rs183980988 S2  | NA          | 1.38E-07 | 1        | 1.01E-04    | 2.77E-06 | 1           | 0.00273035  |
| phe.Fasting_rs7571183  | S8  | MTX2   | rs184233232 S7  | DIAPH1      | 1.38E-07 | 1        | 1.01E-04    | 2.77E-06 | 1           | 0.00273035  |
| phe.Fasting_rs7571183  | S8  | MTX2   | rs184509477 S13 | "PCDHGB4,PI | 1.38E-07 | 1        | 1.01E-04    | 2.77E-06 | 1           | 0.00273035  |
| phe.Fasting_rs7571183  | S8  | MTX2   | rs185069296 S15 | "LOC1005056 | 1.38E-07 | 1        | 0.000101426 | 2.77E-06 | 1           | 0.00273035  |
| phe.Fasting_rs7571183  | S8  | MTX2   | rs185759881 S7  | DIAPH1      | 1.38E-07 | 1.00E+00 | 1.01E-04    | 2.77E-06 | 1           | 0.00273035  |
| phe.Fasting_rs7571183  | S8  | MTX2   | rs187000011 S11 | DIAPH1      | 1.38E-07 | 1        | 1.01E-04    | 2.77E-06 | 1           | 0.00273035  |
| phe.Fasting_rs7571183  | S8  | MTX2   | rs188981295 S5  | "RPS27AP10, | 1.38E-07 | 1        | 1.01E-04    | 2.77E-06 | 1           | 0.00273035  |
| phe.Fasting_rs7571183  | S8  | MTX2   | rs191544043 S8  | DIAPH1      | 1.38E-07 | 1        | 1.01E-04    | 2.77E-06 | 1           | 0.00273035  |
| phe.Fasting_rs7571183  | S8  | MTX2   | rs191766712 S7  | DIAPH1      | 1.38E-07 | 1        | 1.01E-04    | 2.77E-06 | 1           | 0.00273035  |
| phe.Fasting_rs7571183  | S8  | MTX2   | rs192690040 S7  | DIAPH1      | 1.38E-07 | 1.00E+00 | 1.01E-04    | 2.77E-06 | 1           | 0.00273035  |
| phe.Fasting_rs7571183  | S8  | MTX2   | rs192765219 S7  | DIAPH1      | 1.38E-07 | 1.00E+00 | 1.01E-04    | 2.77E-06 | 1           | 0.00273035  |
| phe.Fasting_rs7571183  | S8  | MTX2   | rs192770525 S7  | DIAPH1      | 1.38E-07 | 1        | 0.000101426 | 2.77E-06 | 1           | 0.00273035  |
| phe.Fasting_rs7571183  | S8  | MTX2   | rs79517926 S15  | "DIAPH1,LOC | 1.37E-06 | 1.00E+00 | 8.05E-04    | 3.03E-09 | 0.123424    | 6.43E-06    |
| phe.Fasting_rs75758702 | S24 | NA     | rs113568654 S12 | SPTLC1      | 7.20E-08 | 1.00E+00 | 5.67E-05    | 4.29E-06 | 1           | 0.00400856  |
| phe.Fasting_rs75758702 | S24 | NA     | rs115083290 S19 | NA          | 2.21E-17 | 9.03E-10 | 1.43E-13    | 3.84E-10 | 0.0156123   | 1.01E-06    |
| phe.Fasting_rs75758702 | S24 | NA     | rs115752779 S19 | NA          | 2.21E-17 | 9.03E-10 | 1.43E-13    | 3.84E-10 | 0.0156123   | 1.01E-06    |
| phe.Fasting_rs75758702 | S24 | NA     | rs141926074 S8  | ATE1        | 2.41E-18 | 9.83E-11 | 4.50E-14    | 1.42E-09 | 0.0577703   | 3.24E-06    |
| phe.Fasting_rs75758702 | S24 | NA     | rs57503635 S3   | NA          | 3.21E-17 | 1.31E-09 | 1.80E-13    | 1.05E-07 | 1           | 0.000146814 |
| phe.Fasting_rs75758702 | S24 | NA     | rs73619637 S8   | NA          | 4.24E-17 | 1.73E-09 | 2.22E-13    | 2.23E-19 | 9.08E-12    | 3.49E-13    |
| phe.Fasting_rs75758702 | S24 | NA     | rs78516788 S8   | SLC38A1     | 7.36E-08 | 1        | 5.79E-05    | 1.28E-06 | 1           | 1.40E-03    |
| phe.Fasting_rs75864203 | S8  | CNTLN  | rs115083290 S19 | NA          | 3.88E-09 | 1.59E-01 | 3.87E-06    | 5.72E-17 | 2.33E-09    | 4.07E-12    |
| phe.Fasting_rs75864203 | S8  | CNTLN  | rs115752779 S19 | NA          | 3.88E-09 | 1.59E-01 | 3.87E-06    | 5.72E-17 | 2.33E-09    | 4.07E-12    |
| phe.Fasting_rs75864203 | S8  | CNTLN  | rs139070959 S8  | RPN2        | 1.05E-17 | 4.28E-10 | 9.93E-14    | 3.36E-12 | 0.000136888 | 1.42E-08    |
| phe.Fasting_rs75864203 | S8  | CNTLN  | rs145412529 S8  | "RBL1,RPS3A | 5.93E-18 | 2.42E-10 | 7.36E-14    | 4.01E-10 | 0.0163221   | 1.06E-06    |
| phe.Fasting_rs75864203 | S8  | CNTLN  | rs57503635 S3   | NA          | 1.70E-06 | 1.00E+00 | 9.73E-04    | 8.28E-16 | 3.37E-08    | 1.16E-11    |
| phe.Fasting_rs75864203 | S8  | CNTLN  | rs78516788 S8   | SLC38A1     | 7.72E-18 | 3.15E-10 | 8.50E-14    | 3.24E-07 | 1           | 0.000405956 |
| phe.Fasting_rs75949566 | S5  | TMEM64 | rs112348319 S8  | SPTLC1      | 1.87E-07 | 1.00E+00 | 1.34E-04    | 4.38E-06 | 1           | 0.00408878  |
| phe.Fasting_rs75949566 | S5  | TMEM64 | rs112608164 S8  | SPTLC1      | 1.87E-07 | 1.00E+00 | 1.34E-04    | 4.38E-06 | 1           | 0.00408878  |

|                        |    |        |             |     |             |          |            |             |          |            |             |
|------------------------|----|--------|-------------|-----|-------------|----------|------------|-------------|----------|------------|-------------|
| phe.Fasting_rs75949566 | S5 | TMEM64 | rs115787552 | S5  | KPNA3       | 1.98E-06 | 1.00E+00   | 1.11E-03    | 6.62E-15 | 2.70E-07   | 5.94E-11    |
| phe.Fasting_rs75949566 | S5 | TMEM64 | rs115888477 | S8  | NA          | 9.67E-06 | 1.00E+00   | 4.44E-03    | 1.03E-15 | 4.17E-08   | 1.18E-11    |
| phe.Fasting_rs75949566 | S5 | TMEM64 | rs116079984 | S8  | KPNA3       | 1.98E-06 | 1.00E+00   | 1.11E-03    | 8.14E-15 | 3.31E-07   | 7.18E-11    |
| phe.Fasting_rs75949566 | S5 | TMEM64 | rs146815317 | S5  | KPNA3       | 1.98E-06 | 1          | 1.11E-03    | 6.62E-15 | 2.70E-07   | 5.94E-11    |
| phe.Fasting_rs75949566 | S5 | TMEM64 | rs150117838 | S8  | KPNA3       | 1.98E-06 | 1          | 1.11E-03    | 6.29E-15 | 2.56E-07   | 5.69E-11    |
| phe.Fasting_rs75949566 | S5 | TMEM64 | rs57503635  | S3  | NA          | 1.30E-07 | 1          | 9.62E-05    | 3.20E-07 | 1          | 0.000401629 |
| phe.Fasting_rs75949566 | S5 | TMEM64 | rs7256517   | S7  | CYTH2       | 3.09E-16 | 1.26E-08   | 1.03E-12    | 2.24E-08 | 0.911569   | 3.76E-05    |
| phe.Fasting_rs75949566 | S5 | TMEM64 | rs73283603  | S7  | ZWINT       | 3.41E-16 | 1.39E-08   | 1.13E-12    | 9.14E-11 | 0.00371982 | 2.80E-07    |
| phe.Fasting_rs75949566 | S5 | TMEM64 | rs73392640  | S8  | POLR3B      | 1.24E-10 | 0.00507231 | 1.58E-07    | 3.66E-08 | 1          | 5.80E-05    |
| phe.Fasting_rs75949566 | S5 | TMEM64 | rs75758702  | S24 | NA          | 9.77E-08 | 1.00E+00   | 7.47E-05    | 5.87E-18 | 2.39E-10   | 1.05E-12    |
| phe.Fasting_rs75949566 | S5 | TMEM64 | rs76542405  | S5  | SPTLC1      | 1.87E-07 | 1          | 1.34E-04    | 4.38E-06 | 1          | 0.00408878  |
| phe.Fasting_rs75949566 | S5 | TMEM64 | rs77523818  | S7  | SPTLC1      | 1.87E-07 | 1          | 1.34E-04    | 4.38E-06 | 1          | 0.00408878  |
| phe.Fasting_rs75949566 | S5 | TMEM64 | rs77798597  | S7  | KPNA3       | 1.98E-06 | 1          | 1.11E-03    | 6.29E-15 | 2.56E-07   | 5.69E-11    |
| phe.Fasting_rs75949566 | S5 | TMEM64 | rs78736524  | S5  | KPNA3       | 1.98E-06 | 1          | 1.11E-03    | 6.62E-15 | 2.70E-07   | 5.94E-11    |
| phe.Fasting_rs75949566 | S5 | TMEM64 | rs79781495  | S8  | KPNA3       | 1.98E-06 | 1.00E+00   | 1.11E-03    | 6.29E-15 | 2.56E-07   | 5.69E-11    |
| phe.Fasting_rs75949566 | S5 | TMEM64 | rs80332465  | S5  | KPNA3       | 2.01E-06 | 1.00E+00   | 1.12E-03    | 6.78E-15 | 2.76E-07   | 6.06E-11    |
| phe.Fasting_rs75949566 | S5 | TMEM64 | rs80334773  | S5  | KPNA3       | 2.01E-06 | 1          | 0.00112476  | 6.78E-15 | 2.76E-07   | 6.06E-11    |
| phe.Fasting_rs75949566 | S5 | TMEM64 | rs8075478   | S8  | MYH10       | 1.67E-07 | 1.00E+00   | 1.21E-04    | 2.11E-16 | 8.57E-09   | 8.13E-12    |
| phe.Fasting_rs7597047  | S8 | MTX2   | rs112027720 | S7  | DIAPH1      | 1.38E-07 | 1.00E+00   | 1.01E-04    | 2.71E-06 | 1          | 0.00267745  |
| phe.Fasting_rs7597047  | S8 | MTX2   | rs113219478 | S7  | DIAPH1      | 1.38E-07 | 1.00E+00   | 1.01E-04    | 2.71E-06 | 1          | 0.00267745  |
| phe.Fasting_rs7597047  | S8 | MTX2   | rs116011837 | S9  | BRD2        | 1.57E-05 | 1.00E+00   | 6.75E-03    | 6.33E-06 | 1          | 0.00557907  |
| phe.Fasting_rs7597047  | S8 | MTX2   | rs116120727 | S9  | BRD2        | 1.57E-05 | 1.00E+00   | 6.75E-03    | 6.33E-06 | 1          | 0.00557907  |
| phe.Fasting_rs7597047  | S8 | MTX2   | rs138487229 | S11 | DIAPH1      | 1.38E-07 | 1.00E+00   | 1.01E-04    | 2.71E-06 | 1          | 0.00267745  |
| phe.Fasting_rs7597047  | S8 | MTX2   | rs138738950 | S8  | "PCDHGB2,Pi | 1.38E-07 | 1          | 1.01E-04    | 2.65E-06 | 1          | 0.002628    |
| phe.Fasting_rs7597047  | S8 | MTX2   | rs139297927 | S8  | DIAPH1      | 1.38E-07 | 1          | 0.000101426 | 2.71E-06 | 1          | 2.68E-03    |
| phe.Fasting_rs7597047  | S8 | MTX2   | rs139337303 | S8  | DIAPH1      | 1.38E-07 | 1.00E+00   | 1.01E-04    | 2.71E-06 | 1          | 0.00267745  |
| phe.Fasting_rs7597047  | S8 | MTX2   | rs139621309 | S18 | "LOC1005056 | 1.38E-07 | 1.00E+00   | 1.01E-04    | 2.71E-06 | 1          | 0.00267745  |
| phe.Fasting_rs7597047  | S8 | MTX2   | rs140070363 | S8  | DIAPH1      | 1.38E-07 | 1.00E+00   | 1.01E-04    | 2.71E-06 | 1          | 2.68E-03    |
| phe.Fasting_rs7597047  | S8 | MTX2   | rs140644750 | S13 | DIAPH1      | 1.38E-07 | 1          | 0.000101426 | 2.71E-06 | 1          | 0.00267745  |
| phe.Fasting_rs7597047  | S8 | MTX2   | rs141022544 | S8  | DIAPH1      | 1.38E-07 | 1.00E+00   | 1.01E-04    | 2.71E-06 | 1          | 0.00267745  |
| phe.Fasting_rs7597047  | S8 | MTX2   | rs141525984 | S5  | DIAPH1      | 1.38E-07 | 1.00E+00   | 1.01E-04    | 2.71E-06 | 1          | 0.00267745  |
| phe.Fasting_rs7597047  | S8 | MTX2   | rs142480565 | S8  | DIAPH1      | 1.38E-07 | 1.00E+00   | 1.01E-04    | 2.71E-06 | 1          | 0.00267745  |
| phe.Fasting_rs7597047  | S8 | MTX2   | rs142718558 | S7  | "DIAPH1,LOC | 1.38E-07 | 1.00E+00   | 1.01E-04    | 2.71E-06 | 1          | 0.00267745  |
| phe.Fasting_rs7597047  | S8 | MTX2   | rs144613910 | S8  | DIAPH1      | 1.38E-07 | 1.00E+00   | 1.01E-04    | 2.71E-06 | 1          | 0.00267745  |
| phe.Fasting_rs7597047  | S8 | MTX2   | rs146220673 | S7  | DIAPH1      | 1.38E-07 | 1.00E+00   | 1.01E-04    | 2.71E-06 | 1          | 0.00267745  |
| phe.Fasting_rs7597047  | S8 | MTX2   | rs146878162 | S7  | DIAPH1      | 1.38E-07 | 1.00E+00   | 1.01E-04    | 2.71E-06 | 1          | 0.00267745  |
| phe.Fasting_rs7597047  | S8 | MTX2   | rs147314451 | S8  | DIAPH1      | 1.38E-07 | 1          | 1.01E-04    | 2.71E-06 | 1          | 0.00267745  |
| phe.Fasting_rs7597047  | S8 | MTX2   | rs147646948 | S7  | "LOC1005056 | 1.38E-07 | 1          | 1.01E-04    | 2.71E-06 | 1          | 0.00267745  |
| phe.Fasting_rs7597047  | S8 | MTX2   | rs148116628 | S7  | DIAPH1      | 1.38E-07 | 1          | 1.01E-04    | 2.71E-06 | 1          | 0.00267745  |
| phe.Fasting_rs7597047  | S8 | MTX2   | rs148423011 | S7  | DIAPH1      | 1.38E-07 | 1          | 1.01E-04    | 2.71E-06 | 1          | 0.00267745  |



|                        |    |      |             |     |             |          |             |             |          |            |             |
|------------------------|----|------|-------------|-----|-------------|----------|-------------|-------------|----------|------------|-------------|
| phe.Fasting_rs7597047  | S8 | MTX2 | rs149075406 | S8  | DIAPH1      | 1.38E-07 | 1           | 1.01E-04    | 2.71E-06 | 1          | 0.00267745  |
| phe.Fasting_rs7597047  | S8 | MTX2 | rs149334783 | S8  | DIAPH1      | 1.38E-07 | 1           | 0.000101426 | 2.71E-06 | 1          | 0.00267745  |
| phe.Fasting_rs7597047  | S8 | MTX2 | rs149716949 | S5  | DIAPH1      | 5.67E-08 | 1.00E+00    | 4.59E-05    | 5.45E-07 | 1          | 0.000647157 |
| phe.Fasting_rs7597047  | S8 | MTX2 | rs150452206 | S13 | "DIAPH1,LOC | 1.38E-07 | 1           | 1.01E-04    | 2.71E-06 | 1          | 0.00267745  |
| phe.Fasting_rs7597047  | S8 | MTX2 | rs150675915 | S7  | DIAPH1      | 1.38E-07 | 1           | 1.01E-04    | 2.71E-06 | 1          | 0.00267745  |
| phe.Fasting_rs7597047  | S8 | MTX2 | rs150765570 | S7  | DIAPH1      | 1.38E-07 | 1           | 1.01E-04    | 2.71E-06 | 1          | 0.00267745  |
| phe.Fasting_rs7597047  | S8 | MTX2 | rs150992994 | S11 | "PCDHGA5,PI | 1.41E-07 | 1           | 1.03E-04    | 3.25E-07 | 1          | 0.000406305 |
| phe.Fasting_rs7597047  | S8 | MTX2 | rs151204700 | S8  | DIAPH1      | 1.38E-07 | 1.00E+00    | 1.01E-04    | 2.71E-06 | 1          | 0.00267745  |
| phe.Fasting_rs7597047  | S8 | MTX2 | rs180772028 | S8  | "DIAPH1,LOC | 1.38E-07 | 1.00E+00    | 1.01E-04    | 2.71E-06 | 1          | 0.00267745  |
| phe.Fasting_rs7597047  | S8 | MTX2 | rs181224861 | S7  | DIAPH1      | 1.38E-07 | 1           | 0.000101426 | 2.71E-06 | 1          | 0.00267745  |
| phe.Fasting_rs7597047  | S8 | MTX2 | rs182714699 | S8  | DIAPH1      | 1.38E-07 | 1.00E+00    | 1.01E-04    | 2.71E-06 | 1          | 2.68E-03    |
| phe.Fasting_rs7597047  | S8 | MTX2 | rs183597049 | S7  | DIAPH1      | 1.38E-07 | 1.00E+00    | 1.01E-04    | 2.71E-06 | 1          | 0.00267745  |
| phe.Fasting_rs7597047  | S8 | MTX2 | rs183980988 | S2  | NA          | 1.38E-07 | 1.00E+00    | 1.01E-04    | 2.71E-06 | 1          | 0.00267745  |
| phe.Fasting_rs7597047  | S8 | MTX2 | rs184233232 | S7  | DIAPH1      | 1.38E-07 | 1.00E+00    | 1.01E-04    | 2.71E-06 | 1          | 0.00267745  |
| phe.Fasting_rs7597047  | S8 | MTX2 | rs184509477 | S13 | "PCDHGB4,PI | 1.38E-07 | 1.00E+00    | 1.01E-04    | 2.71E-06 | 1          | 0.00267745  |
| phe.Fasting_rs7597047  | S8 | MTX2 | rs185069296 | S15 | "LOC1005056 | 1.38E-07 | 1.00E+00    | 1.01E-04    | 2.71E-06 | 1          | 0.00267745  |
| phe.Fasting_rs7597047  | S8 | MTX2 | rs185759881 | S7  | DIAPH1      | 1.38E-07 | 1           | 1.01E-04    | 2.71E-06 | 1          | 0.00267745  |
| phe.Fasting_rs7597047  | S8 | MTX2 | rs187000011 | S11 | DIAPH1      | 1.38E-07 | 1           | 0.000101426 | 2.71E-06 | 1          | 2.68E-03    |
| phe.Fasting_rs7597047  | S8 | MTX2 | rs188981295 | S5  | "RPS27AP10, | 1.38E-07 | 1.00E+00    | 1.01E-04    | 2.71E-06 | 1          | 0.00267745  |
| phe.Fasting_rs7597047  | S8 | MTX2 | rs191544043 | S8  | DIAPH1      | 1.38E-07 | 1.00E+00    | 1.01E-04    | 2.71E-06 | 1          | 0.00267745  |
| phe.Fasting_rs7597047  | S8 | MTX2 | rs191766712 | S7  | DIAPH1      | 1.38E-07 | 1.00E+00    | 1.01E-04    | 2.71E-06 | 1          | 2.68E-03    |
| phe.Fasting_rs7597047  | S8 | MTX2 | rs192690040 | S7  | DIAPH1      | 1.38E-07 | 1           | 0.000101426 | 2.71E-06 | 1          | 0.00267745  |
| phe.Fasting_rs7597047  | S8 | MTX2 | rs192765219 | S7  | DIAPH1      | 1.38E-07 | 1.00E+00    | 1.01E-04    | 2.71E-06 | 1          | 0.00267745  |
| phe.Fasting_rs7597047  | S8 | MTX2 | rs192770525 | S7  | DIAPH1      | 1.38E-07 | 1.00E+00    | 1.01E-04    | 2.71E-06 | 1          | 0.00267745  |
| phe.Fasting_rs7597047  | S8 | MTX2 | rs79517926  | S15 | "DIAPH1,LOC | 1.37E-06 | 1.00E+00    | 8.05E-04    | 2.92E-09 | 0.118956   | 6.21E-06    |
| phe.Fasting_rs7603436  | S5 | RRM2 | rs115083290 | S19 | NA          | 2.35E-10 | 9.61E-03    | 2.87E-07    | 1.91E-07 | 1          | 0.000253959 |
| phe.Fasting_rs7603436  | S5 | RRM2 | rs115752779 | S19 | NA          | 2.35E-10 | 9.61E-03    | 2.87E-07    | 1.91E-07 | 1          | 0.000253959 |
| phe.Fasting_rs7603436  | S5 | RRM2 | rs141692339 | S3  | "PCDHGA6,PI | 1.88E-11 | 7.70E-04    | 2.82E-08    | 1.67E-07 | 1          | 0.000225599 |
| phe.Fasting_rs7603436  | S5 | RRM2 | rs141926074 | S8  | ATE1        | 8.68E-08 | 1.00E+00    | 6.72E-05    | 1.07E-05 | 1          | 0.00863279  |
| phe.Fasting_rs7603436  | S5 | RRM2 | rs150992994 | S11 | "PCDHGA5,PI | 2.83E-12 | 0.000115363 | 5.20E-09    | 4.21E-07 | 1          | 0.000511852 |
| phe.Fasting_rs7603436  | S5 | RRM2 | rs60011869  | S16 | NA          | 1.07E-11 | 0.000435955 | 1.69E-08    | 1.76E-09 | 0.0714764  | 3.92E-06    |
| phe.Fasting_rs76146702 | S5 | PHC3 | rs111576333 | S5  | TMEM64      | 1.89E-08 | 0.770765    | 1.67E-05    | 3.63E-08 | 1          | 5.76E-05    |
| phe.Fasting_rs76146702 | S5 | PHC3 | rs112091318 | S5  | TMEM64      | 4.18E-09 | 0.170602    | 4.13E-06    | 5.40E-08 | 1          | 8.21E-05    |
| phe.Fasting_rs76146702 | S5 | PHC3 | rs115083290 | S19 | NA          | 1.02E-07 | 1           | 7.74E-05    | 6.54E-09 | 0.266138   | 1.27E-05    |
| phe.Fasting_rs76146702 | S5 | PHC3 | rs115752779 | S19 | NA          | 1.02E-07 | 1           | 7.74E-05    | 6.54E-09 | 0.266138   | 1.27E-05    |
| phe.Fasting_rs76146702 | S5 | PHC3 | rs115888477 | S8  | NA          | 7.97E-06 | 1.00E+00    | 3.75E-03    | 6.01E-11 | 0.00244733 | 1.92E-07    |
| phe.Fasting_rs76146702 | S5 | PHC3 | rs116011837 | S9  | BRD2        | 3.20E-13 | 1.31E-05    | 6.85E-10    | 1.54E-11 | 0.00062499 | 5.53E-08    |
| phe.Fasting_rs76146702 | S5 | PHC3 | rs116120727 | S9  | BRD2        | 3.20E-13 | 1.31E-05    | 6.85E-10    | 1.54E-11 | 0.00062499 | 5.53E-08    |
| phe.Fasting_rs76146702 | S5 | PHC3 | rs116548615 | S8  | TMEM45B     | 1.72E-18 | 7.00E-11    | 3.71E-14    | 2.09E-10 | 0.00851021 | 5.89E-07    |
| phe.Fasting_rs76146702 | S5 | PHC3 | rs11989304  | S4  | TMEM64      | 1.89E-08 | 0.770765    | 1.67E-05    | 3.50E-08 | 1          | 5.57E-05    |

|                        |    |      |             |     |             |          |          |             |          |             |             |
|------------------------|----|------|-------------|-----|-------------|----------|----------|-------------|----------|-------------|-------------|
| phe.Fasting_rs76146702 | S5 | PHC3 | rs140524622 | S7  | MRPL10      | 2.75E-08 | 1.00E+00 | 2.37E-05    | 1.85E-06 | 1           | 0.00193234  |
| phe.Fasting_rs76146702 | S5 | PHC3 | rs141926074 | S8  | ATE1        | 1.66E-19 | 6.78E-12 | 2.40E-14    | 8.65E-11 | 0.00352252  | 2.67E-07    |
| phe.Fasting_rs76146702 | S5 | PHC3 | rs150916187 | S4  | HIST1H2BK   | 7.05E-06 | 1        | 0.00337474  | 6.37E-14 | 2.59E-06    | 4.32E-10    |
| phe.Fasting_rs76146702 | S5 | PHC3 | rs16894241  | S4  | HIST1H2BK   | 1.98E-05 | 1.00E+00 | 8.26E-03    | 1.81E-13 | 7.35E-06    | 1.02E-09    |
| phe.Fasting_rs76146702 | S5 | PHC3 | rs73392640  | S8  | POLR3B      | 6.77E-08 | 1.00E+00 | 5.38E-05    | 7.59E-06 | 1           | 0.00648187  |
| phe.Fasting_rs76146702 | S5 | PHC3 | rs75949566  | S5  | TMEM64      | 2.09E-08 | 8.52E-01 | 1.84E-05    | 9.31E-10 | 0.0378904   | 2.22E-06    |
| phe.Fasting_rs76146702 | S5 | PHC3 | rs7657672   | S8  | CLCN3       | 1.35E-05 | 1.00E+00 | 5.92E-03    | 6.74E-06 | 1           | 0.00588374  |
| phe.Fasting_rs76146702 | S5 | PHC3 | rs77845645  | S21 | NA          | 1.01E-08 | 4.11E-01 | 9.37E-06    | 7.43E-13 | 3.03E-05    | 3.58E-09    |
| phe.Fasting_rs76146702 | S5 | PHC3 | rs78990344  | S2  | LOC10050631 | 1.89E-08 | 7.71E-01 | 1.67E-05    | 3.50E-08 | 1           | 5.57E-05    |
| phe.Fasting_rs7615039  | S8 | PHC3 | rs111576333 | S5  | TMEM64      | 1.88E-08 | 0.769535 | 1.67E-05    | 3.22E-15 | 1.31E-07    | 3.09E-11    |
| phe.Fasting_rs7615039  | S8 | PHC3 | rs112091318 | S5  | TMEM64      | 5.74E-09 | 0.234299 | 5.57E-06    | 5.37E-15 | 2.19E-07    | 4.92E-11    |
| phe.Fasting_rs7615039  | S8 | PHC3 | rs112348319 | S8  | SPTLC1      | 1.71E-05 | 1.00E+00 | 7.28E-03    | 1.22E-09 | 0.0494629   | 2.84E-06    |
| phe.Fasting_rs7615039  | S8 | PHC3 | rs112608164 | S8  | SPTLC1      | 1.71E-05 | 1.00E+00 | 7.28E-03    | 1.22E-09 | 0.0494629   | 2.84E-06    |
| phe.Fasting_rs7615039  | S8 | PHC3 | rs113568654 | S12 | SPTLC1      | 1.64E-05 | 1.00E+00 | 7.00E-03    | 1.56E-08 | 0.634275    | 2.76E-05    |
| phe.Fasting_rs7615039  | S8 | PHC3 | rs114565620 | S8  | RCL1        | 2.56E-19 | 1.05E-11 | 2.40E-14    | 5.85E-07 | 1           | 0.000691616 |
| phe.Fasting_rs7615039  | S8 | PHC3 | rs115083290 | S19 | NA          | 8.10E-08 | 1.00E+00 | 6.30E-05    | 5.15E-09 | 0.209812    | 1.02E-05    |
| phe.Fasting_rs7615039  | S8 | PHC3 | rs115305957 | S23 | NA          | 9.32E-07 | 1.00E+00 | 5.69E-04    | 1.27E-07 | 1           | 0.000176021 |
| phe.Fasting_rs7615039  | S8 | PHC3 | rs115752779 | S19 | NA          | 8.10E-08 | 1.00E+00 | 6.30E-05    | 5.15E-09 | 0.209812    | 1.02E-05    |
| phe.Fasting_rs7615039  | S8 | PHC3 | rs115888477 | S8  | NA          | 1.24E-06 | 1.00E+00 | 7.34E-04    | 1.29E-10 | 0.00523971  | 3.88E-07    |
| phe.Fasting_rs7615039  | S8 | PHC3 | rs116011837 | S9  | BRD2        | 2.39E-13 | 9.74E-06 | 5.15E-10    | 3.34E-11 | 0.00135925  | 1.12E-07    |
| phe.Fasting_rs7615039  | S8 | PHC3 | rs116120727 | S9  | BRD2        | 2.39E-13 | 9.74E-06 | 5.15E-10    | 3.34E-11 | 0.00135925  | 1.12E-07    |
| phe.Fasting_rs7615039  | S8 | PHC3 | rs116548615 | S8  | TMEM45B     | 4.77E-19 | 1.95E-11 | 2.47E-14    | 1.23E-09 | 0.049904    | 2.86E-06    |
| phe.Fasting_rs7615039  | S8 | PHC3 | rs11989304  | S4  | TMEM64      | 1.88E-08 | 0.769535 | 1.67E-05    | 3.35E-15 | 1.37E-07    | 3.21E-11    |
| phe.Fasting_rs7615039  | S8 | PHC3 | rs140524622 | S7  | MRPL10      | 2.11E-08 | 0.860322 | 1.85E-05    | 3.23E-06 | 1           | 0.00312049  |
| phe.Fasting_rs7615039  | S8 | PHC3 | rs141926074 | S8  | ATE1        | 1.10E-19 | 4.51E-12 | 2.23E-14    | 2.10E-11 | 0.000854079 | 7.39E-08    |
| phe.Fasting_rs7615039  | S8 | PHC3 | rs73392640  | S8  | POLR3B      | 6.03E-08 | 1        | 4.85E-05    | 5.22E-09 | 0.212586    | 1.03E-05    |
| phe.Fasting_rs7615039  | S8 | PHC3 | rs74627895  | S8  | TMEM64      | 5.74E-09 | 0.234299 | 5.57E-06    | 2.92E-10 | 0.0118714   | 7.93E-07    |
| phe.Fasting_rs7615039  | S8 | PHC3 | rs74701059  | S24 | C17orf102   | 1.00E-06 | 1        | 0.000606332 | 1.49E-07 | 1           | 0.000202911 |
| phe.Fasting_rs7615039  | S8 | PHC3 | rs75350765  | S5  | RCL1        | 2.56E-19 | 1.05E-11 | 2.40E-14    | 5.85E-07 | 1           | 0.000691616 |
| phe.Fasting_rs7615039  | S8 | PHC3 | rs75506779  | S5  | TMCO3       | 6.49E-14 | 2.65E-06 | 1.51E-10    | 5.29E-06 | 1           | 0.00480172  |
| phe.Fasting_rs7615039  | S8 | PHC3 | rs75949566  | S5  | TMEM64      | 2.07E-08 | 0.84493  | 1.82E-05    | 3.97E-15 | 1.62E-07    | 3.73E-11    |
| phe.Fasting_rs7615039  | S8 | PHC3 | rs76542405  | S5  | SPTLC1      | 1.71E-05 | 1        | 7.28E-03    | 1.22E-09 | 0.0494629   | 2.84E-06    |
| phe.Fasting_rs7615039  | S8 | PHC3 | rs77523818  | S7  | SPTLC1      | 1.71E-05 | 1        | 7.28E-03    | 1.22E-09 | 0.0494629   | 2.84E-06    |
| phe.Fasting_rs7615039  | S8 | PHC3 | rs7763107   | S8  | FARS2       | 1.17E-09 | 4.79E-02 | 1.27E-06    | 2.87E-06 | 1           | 0.00281845  |
| phe.Fasting_rs7615039  | S8 | PHC3 | rs77845645  | S21 | NA          | 8.97E-09 | 3.66E-01 | 8.45E-06    | 2.97E-18 | 1.21E-10    | 7.99E-13    |
| phe.Fasting_rs7615039  | S8 | PHC3 | rs78990344  | S2  | LOC10050631 | 1.88E-08 | 0.769535 | 1.67E-05    | 3.35E-15 | 1.37E-07    | 3.21E-11    |
| phe.Fasting_rs7615039  | S8 | PHC3 | rs79703349  | S24 | C17orf102   | 1.00E-06 | 1.00E+00 | 6.06E-04    | 2.09E-07 | 1           | 2.75E-04    |
| phe.Fasting_rs7638400  | S7 | PHC3 | rs111576333 | S5  | TMEM64      | 2.07E-08 | 8.44E-01 | 1.82E-05    | 2.31E-10 | 0.00941342  | 6.43E-07    |
| phe.Fasting_rs7638400  | S7 | PHC3 | rs112091318 | S5  | TMEM64      | 6.28E-09 | 2.57E-01 | 6.07E-06    | 3.37E-10 | 0.013698    | 8.96E-07    |
| phe.Fasting_rs7638400  | S7 | PHC3 | rs112348319 | S8  | SPTLC1      | 1.92E-05 | 1.00E+00 | 8.06E-03    | 7.84E-10 | 0.0319139   | 1.93E-06    |

|                        |    |        |                 |             |          |           |             |          |             |             |
|------------------------|----|--------|-----------------|-------------|----------|-----------|-------------|----------|-------------|-------------|
| phe.Fasting_rs7638400  | S7 | PHC3   | rs112608164 S8  | SPTLC1      | 1.92E-05 | 1.00E+00  | 8.06E-03    | 7.84E-10 | 0.0319139   | 1.93E-06    |
| phe.Fasting_rs7638400  | S7 | PHC3   | rs113568654 S12 | SPTLC1      | 1.84E-05 | 1.00E+00  | 7.76E-03    | 1.04E-08 | 0.421423    | 1.91E-05    |
| phe.Fasting_rs7638400  | S7 | PHC3   | rs114565620 S8  | RCL1        | 2.84E-19 | 1.16E-11  | 2.40E-14    | 4.01E-07 | 1           | 0.000489631 |
| phe.Fasting_rs7638400  | S7 | PHC3   | rs115083290 S19 | NA          | 8.85E-08 | 1         | 6.83E-05    | 3.40E-09 | 0.138522    | 7.12E-06    |
| phe.Fasting_rs7638400  | S7 | PHC3   | rs115752779 S19 | NA          | 8.85E-08 | 1         | 6.83E-05    | 3.40E-09 | 0.138522    | 7.12E-06    |
| phe.Fasting_rs7638400  | S7 | PHC3   | rs115888477 S8  | NA          | 1.34E-06 | 1         | 0.000791384 | 7.82E-11 | 0.00318365  | 2.44E-07    |
| phe.Fasting_rs7638400  | S7 | PHC3   | rs116011837 S9  | BRD2        | 2.70E-13 | 1.10E-05  | 5.81E-10    | 2.07E-11 | 0.000841008 | 7.31E-08    |
| phe.Fasting_rs7638400  | S7 | PHC3   | rs116120727 S9  | BRD2        | 2.70E-13 | 1.10E-05  | 5.81E-10    | 2.07E-11 | 0.000841008 | 7.31E-08    |
| phe.Fasting_rs7638400  | S7 | PHC3   | rs116548615 S8  | TMEM45B     | 5.29E-19 | 2.16E-11  | 2.49E-14    | 7.92E-10 | 0.0322544   | 1.95E-06    |
| phe.Fasting_rs7638400  | S7 | PHC3   | rs11989304 S4   | TMEM64      | 2.07E-08 | 8.44E-01  | 1.82E-05    | 2.29E-10 | 0.00932569  | 6.39E-07    |
| phe.Fasting_rs7638400  | S7 | PHC3   | rs140524622 S7  | MRPL10      | 2.30E-08 | 0.93902   | 2.01E-05    | 2.14E-06 | 1           | 0.00219216  |
| phe.Fasting_rs7638400  | S7 | PHC3   | rs141926074 S8  | ATE1        | 1.23E-19 | 5.04E-12  | 2.23E-14    | 1.34E-11 | 0.000545558 | 4.89E-08    |
| phe.Fasting_rs7638400  | S7 | PHC3   | rs73392640 S8   | POLR3B      | 6.58E-08 | 1         | 5.26E-05    | 8.97E-06 | 1           | 0.00747055  |
| phe.Fasting_rs7638400  | S7 | PHC3   | rs74627895 S8   | TMEM64      | 6.28E-09 | 2.57E-01  | 6.07E-06    | 1.27E-06 | 1           | 0.00139909  |
| phe.Fasting_rs7638400  | S7 | PHC3   | rs75350765 S5   | RCL1        | 2.84E-19 | 1.16E-11  | 2.40E-14    | 4.01E-07 | 1           | 0.000489631 |
| phe.Fasting_rs7638400  | S7 | PHC3   | rs75506779 S5   | TMCO3       | 7.38E-14 | 3.01E-06  | 1.70E-10    | 3.50E-06 | 1           | 0.00334821  |
| phe.Fasting_rs7638400  | S7 | PHC3   | rs75949566 S5   | TMEM64      | 2.26E-08 | 0.923876  | 1.98E-05    | 3.24E-10 | 0.0132      | 8.70E-07    |
| phe.Fasting_rs7638400  | S7 | PHC3   | rs76542405 S5   | SPTLC1      | 1.92E-05 | 1         | 0.00806329  | 7.84E-10 | 0.0319139   | 1.93E-06    |
| phe.Fasting_rs7638400  | S7 | PHC3   | rs77523818 S7   | SPTLC1      | 1.92E-05 | 1         | 0.00806329  | 7.84E-10 | 0.0319139   | 1.93E-06    |
| phe.Fasting_rs7638400  | S7 | PHC3   | rs7763107 S8    | FARS2       | 1.30E-09 | 0.0532742 | 1.41E-06    | 2.87E-06 | 1           | 0.00281845  |
| phe.Fasting_rs7638400  | S7 | PHC3   | rs77845645 S21  | NA          | 9.87E-09 | 0.403004  | 9.22E-06    | 9.90E-13 | 4.03E-05    | 4.68E-09    |
| phe.Fasting_rs7638400  | S7 | PHC3   | rs78990344 S2   | LOC10050631 | 2.07E-08 | 0.844108  | 1.82E-05    | 2.29E-10 | 0.00932569  | 6.39E-07    |
| phe.Fasting_rs76542405 | S5 | SPTLC1 | rs114968018 S21 | NA          | 7.91E-14 | 3.23E-06  | 1.82E-10    | 1.22E-06 | 1           | 0.00135245  |
| phe.Fasting_rs76542405 | S5 | SPTLC1 | rs115305957 S23 | NA          | 2.18E-06 | 1         | 0.00120716  | 1.25E-11 | 0.000508253 | 4.57E-08    |
| phe.Fasting_rs76542405 | S5 | SPTLC1 | rs115787552 S5  | KPNA3       | 8.45E-06 | 1         | 0.00394669  | 1.44E-15 | 5.86E-08    | 1.61E-11    |
| phe.Fasting_rs76542405 | S5 | SPTLC1 | rs116079984 S8  | KPNA3       | 8.45E-06 | 1         | 0.00394669  | 1.78E-15 | 7.24E-08    | 1.94E-11    |
| phe.Fasting_rs76542405 | S5 | SPTLC1 | rs12581352 S2   | NA          | 7.63E-18 | 3.12E-10  | 8.49E-14    | 2.07E-13 | 8.42E-06    | 1.15E-09    |
| phe.Fasting_rs76542405 | S5 | SPTLC1 | rs140524622 S7  | MRPL10      | 4.51E-07 | 1         | 0.000298232 | 9.18E-09 | 0.37374     | 1.73E-05    |
| phe.Fasting_rs76542405 | S5 | SPTLC1 | rs146815317 S5  | KPNA3       | 8.45E-06 | 1         | 0.00394669  | 1.44E-15 | 5.86E-08    | 1.61E-11    |
| phe.Fasting_rs76542405 | S5 | SPTLC1 | rs150117838 S8  | KPNA3       | 8.45E-06 | 1         | 0.00394669  | 1.39E-15 | 5.68E-08    | 1.57E-11    |
| phe.Fasting_rs76542405 | S5 | SPTLC1 | rs4820499 S10   | PACCSIN2    | 3.11E-09 | 0.127003  | 3.16E-06    | 1.69E-09 | 0.0688813   | 3.80E-06    |
| phe.Fasting_rs76542405 | S5 | SPTLC1 | rs57503635 S3   | NA          | 1.02E-06 | 1         | 0.00061519  | 3.81E-15 | 1.55E-07    | 3.60E-11    |
| phe.Fasting_rs76542405 | S5 | SPTLC1 | rs7256517 S7    | CYTH2       | 1.97E-13 | 8.05E-06  | 4.34E-10    | 8.09E-08 | 1           | 0.000117069 |
| phe.Fasting_rs76542405 | S5 | SPTLC1 | rs73392640 S8   | POLR3B      | 3.49E-07 | 1         | 0.000238236 | 2.52E-09 | 0.102571    | 5.42E-06    |
| phe.Fasting_rs76542405 | S5 | SPTLC1 | rs73619637 S8   | NA          | 6.45E-17 | 2.63E-09  | 2.97E-13    | 1.16E-08 | 0.47072     | 2.11E-05    |
| phe.Fasting_rs76542405 | S5 | SPTLC1 | rs74701059 S24  | C17orf102   | 2.09E-06 | 1         | 0.00116731  | 1.43E-11 | 0.000580785 | 5.16E-08    |
| phe.Fasting_rs76542405 | S5 | SPTLC1 | rs74914207 S24  | NA          | 3.96E-06 | 1         | 0.002026    | 5.67E-09 | 0.230611    | 1.11E-05    |
| phe.Fasting_rs76542405 | S5 | SPTLC1 | rs7511534 S12   | PACCSIN2    | 2.43E-09 | 0.0993832 | 2.51E-06    | 2.13E-09 | 0.0866869   | 4.68E-06    |
| phe.Fasting_rs76542405 | S5 | SPTLC1 | rs77798597 S7   | KPNA3       | 8.45E-06 | 1         | 0.00394669  | 1.39E-15 | 5.68E-08    | 1.57E-11    |
| phe.Fasting_rs76542405 | S5 | SPTLC1 | rs78736524 S5   | KPNA3       | 8.45E-06 | 1         | 0.00394669  | 1.44E-15 | 5.86E-08    | 1.61E-11    |

|                        |    |        |             |     |              |          |             |            |          |             |             |
|------------------------|----|--------|-------------|-----|--------------|----------|-------------|------------|----------|-------------|-------------|
| phe.Fasting_rs76542405 | S5 | SPTLC1 | rs79703349  | S24 | C17orf102    | 2.09E-06 | 1           | 0.00116731 | 1.80E-11 | 0.000733527 | 6.43E-08    |
| phe.Fasting_rs76542405 | S5 | SPTLC1 | rs79781495  | S8  | KPNA3        | 8.45E-06 | 1           | 0.00394669 | 1.39E-15 | 5.68E-08    | 1.57E-11    |
| phe.Fasting_rs76542405 | S5 | SPTLC1 | rs80332465  | S5  | KPNA3        | 1.20E-05 | 1           | 0.00535958 | 1.50E-15 | 6.12E-08    | 1.67E-11    |
| phe.Fasting_rs76542405 | S5 | SPTLC1 | rs80334773  | S5  | KPNA3        | 1.20E-05 | 1           | 0.00535958 | 1.50E-15 | 6.12E-08    | 1.67E-11    |
| phe.Fasting_rs7657672  | S8 | CLCN3  | rs112027720 | S7  | DIAPH1       | 5.92E-14 | 2.42E-06    | 1.38E-10   | 3.40E-09 | 0.138437    | 7.12E-06    |
| phe.Fasting_rs7657672  | S8 | CLCN3  | rs113219478 | S7  | DIAPH1       | 5.92E-14 | 2.42E-06    | 1.38E-10   | 3.40E-09 | 0.138437    | 7.12E-06    |
| phe.Fasting_rs7657672  | S8 | CLCN3  | rs113357907 | S24 | ISL1         | 5.58E-17 | 2.28E-09    | 2.68E-13   | 5.69E-13 | 2.32E-05    | 2.82E-09    |
| phe.Fasting_rs7657672  | S8 | CLCN3  | rs116011837 | S9  | BRD2         | 5.73E-12 | 0.000234098 | 1.01E-08   | 3.40E-07 | 1           | 0.00042322  |
| phe.Fasting_rs7657672  | S8 | CLCN3  | rs116120727 | S9  | BRD2         | 5.73E-12 | 0.000234098 | 1.01E-08   | 3.40E-07 | 1           | 0.00042322  |
| phe.Fasting_rs7657672  | S8 | CLCN3  | rs116279995 | S20 | "PCDHGA4,PI  | 1.70E-09 | 0.0692363   | 1.79E-06   | 2.93E-07 | 1           | 0.000371172 |
| phe.Fasting_rs7657672  | S8 | CLCN3  | rs138090701 | S5  | HDAC3        | 2.60E-09 | 0.106177    | 2.67E-06   | 3.60E-06 | 1           | 0.00343359  |
| phe.Fasting_rs7657672  | S8 | CLCN3  | rs138136869 | S7  | DIAPH1       | 1.50E-14 | 6.14E-07    | 3.79E-11   | 4.55E-10 | 0.0185068   | 1.19E-06    |
| phe.Fasting_rs7657672  | S8 | CLCN3  | rs138457103 | S10 | DIAPH1       | 4.39E-14 | 1.79E-06    | 1.05E-10   | 3.13E-09 | 0.127206    | 6.59E-06    |
| phe.Fasting_rs7657672  | S8 | CLCN3  | rs138487229 | S11 | DIAPH1       | 5.92E-14 | 2.42E-06    | 1.38E-10   | 3.40E-09 | 0.138437    | 7.12E-06    |
| phe.Fasting_rs7657672  | S8 | CLCN3  | rs138738950 | S8  | "PCDHGB2,PI  | 5.92E-14 | 2.42E-06    | 1.38E-10   | 3.73E-09 | 0.151901    | 7.70E-06    |
| phe.Fasting_rs7657672  | S8 | CLCN3  | rs139297927 | S8  | DIAPH1       | 5.92E-14 | 2.42E-06    | 1.38E-10   | 3.40E-09 | 0.138437    | 7.12E-06    |
| phe.Fasting_rs7657672  | S8 | CLCN3  | rs139337303 | S8  | DIAPH1       | 5.92E-14 | 2.42E-06    | 1.38E-10   | 3.40E-09 | 0.138437    | 7.12E-06    |
| phe.Fasting_rs7657672  | S8 | CLCN3  | rs139403963 | S8  | DIAPH1       | 1.50E-14 | 6.14E-07    | 3.79E-11   | 4.55E-10 | 0.0185068   | 1.19E-06    |
| phe.Fasting_rs7657672  | S8 | CLCN3  | rs139621309 | S18 | "LOC10050505 | 5.92E-14 | 2.42E-06    | 1.38E-10   | 3.40E-09 | 0.138437    | 7.12E-06    |
| phe.Fasting_rs7657672  | S8 | CLCN3  | rs139828110 | S8  | DIAPH1       | 1.50E-14 | 6.14E-07    | 3.79E-11   | 4.55E-10 | 0.0185068   | 1.19E-06    |
| phe.Fasting_rs7657672  | S8 | CLCN3  | rs140070363 | S8  | DIAPH1       | 5.92E-14 | 2.42E-06    | 1.38E-10   | 3.40E-09 | 0.138437    | 7.12E-06    |
| phe.Fasting_rs7657672  | S8 | CLCN3  | rs140644750 | S13 | DIAPH1       | 5.92E-14 | 2.42E-06    | 1.38E-10   | 3.40E-09 | 0.138437    | 7.12E-06    |
| phe.Fasting_rs7657672  | S8 | CLCN3  | rs141022544 | S8  | DIAPH1       | 5.92E-14 | 2.42E-06    | 1.38E-10   | 3.40E-09 | 0.138437    | 7.12E-06    |
| phe.Fasting_rs7657672  | S8 | CLCN3  | rs141525984 | S5  | DIAPH1       | 5.92E-14 | 2.42E-06    | 1.38E-10   | 3.40E-09 | 0.138437    | 7.12E-06    |
| phe.Fasting_rs7657672  | S8 | CLCN3  | rs141692339 | S3  | "PCDHGA6,PI  | 1.62E-09 | 0.0660746   | 1.72E-06   | 4.20E-07 | 1           | 0.00051005  |
| phe.Fasting_rs7657672  | S8 | CLCN3  | rs141926074 | S8  | ATE1         | 3.77E-10 | 0.0153886   | 4.41E-07   | 4.66E-12 | 0.000189613 | 1.86E-08    |
| phe.Fasting_rs7657672  | S8 | CLCN3  | rs142480565 | S8  | DIAPH1       | 5.92E-14 | 2.42E-06    | 1.38E-10   | 3.40E-09 | 0.138437    | 7.12E-06    |
| phe.Fasting_rs7657672  | S8 | CLCN3  | rs142718558 | S7  | "DIAPH1,LOC  | 5.92E-14 | 2.42E-06    | 1.38E-10   | 3.40E-09 | 0.138437    | 7.12E-06    |
| phe.Fasting_rs7657672  | S8 | CLCN3  | rs142789100 | S8  | DIAPH1       | 1.50E-14 | 6.14E-07    | 3.79E-11   | 4.55E-10 | 0.0185068   | 1.19E-06    |
| phe.Fasting_rs7657672  | S8 | CLCN3  | rs142812798 | S7  | DIAPH1       | 1.50E-14 | 6.14E-07    | 3.79E-11   | 4.55E-10 | 0.0185068   | 1.19E-06    |
| phe.Fasting_rs7657672  | S8 | CLCN3  | rs143377827 | S13 | "DIAPH1,LOC  | 1.01E-14 | 4.14E-07    | 2.58E-11   | 3.78E-10 | 0.0153751   | 9.98E-07    |
| phe.Fasting_rs7657672  | S8 | CLCN3  | rs143691978 | S11 | DIAPH1       | 1.50E-14 | 6.14E-07    | 3.79E-11   | 6.23E-10 | 0.0253393   | 1.57E-06    |
| phe.Fasting_rs7657672  | S8 | CLCN3  | rs144081334 | S11 | DIAPH1       | 1.50E-14 | 6.14E-07    | 3.79E-11   | 6.23E-10 | 0.0253393   | 1.57E-06    |
| phe.Fasting_rs7657672  | S8 | CLCN3  | rs144613910 | S8  | DIAPH1       | 5.92E-14 | 2.42E-06    | 1.38E-10   | 3.40E-09 | 0.138437    | 7.12E-06    |
| phe.Fasting_rs7657672  | S8 | CLCN3  | rs145027704 | S11 | DIAPH1       | 1.50E-14 | 6.14E-07    | 3.79E-11   | 6.23E-10 | 0.0253393   | 1.57E-06    |
| phe.Fasting_rs7657672  | S8 | CLCN3  | rs146220673 | S7  | DIAPH1       | 5.92E-14 | 2.42E-06    | 1.38E-10   | 3.40E-09 | 0.138437    | 7.12E-06    |
| phe.Fasting_rs7657672  | S8 | CLCN3  | rs146622060 | S13 | DIAPH1       | 1.50E-14 | 6.14E-07    | 3.79E-11   | 6.23E-10 | 0.0253393   | 1.57E-06    |
| phe.Fasting_rs7657672  | S8 | CLCN3  | rs146878162 | S7  | DIAPH1       | 5.92E-14 | 2.42E-06    | 1.38E-10   | 3.40E-09 | 0.138437    | 7.12E-06    |
| phe.Fasting_rs7657672  | S8 | CLCN3  | rs147314451 | S8  | DIAPH1       | 5.92E-14 | 2.42E-06    | 1.38E-10   | 3.40E-09 | 0.138437    | 7.12E-06    |
| phe.Fasting_rs7657672  | S8 | CLCN3  | rs147417996 | S7  | DIAPH1       | 1.50E-14 | 6.14E-07    | 3.79E-11   | 6.23E-10 | 0.0253393   | 1.57E-06    |

|                       |    |       |                 |             |          |            |          |          |            |             |
|-----------------------|----|-------|-----------------|-------------|----------|------------|----------|----------|------------|-------------|
| phe.Fasting_rs7657672 | S8 | CLCN3 | rs147506725 S21 | "PCDHGA1,PI | 1.70E-09 | 0.0692363  | 1.79E-06 | 2.93E-07 | 1          | 0.000371172 |
| phe.Fasting_rs7657672 | S8 | CLCN3 | rs147646948 S7  | "LOC1005056 | 5.92E-14 | 2.42E-06   | 1.38E-10 | 3.40E-09 | 0.138437   | 7.12E-06    |
| phe.Fasting_rs7657672 | S8 | CLCN3 | rs147677041 S8  | DIAPH1      | 1.50E-14 | 6.14E-07   | 3.79E-11 | 4.55E-10 | 0.0185068  | 1.19E-06    |
| phe.Fasting_rs7657672 | S8 | CLCN3 | rs148116628 S7  | DIAPH1      | 5.92E-14 | 2.42E-06   | 1.38E-10 | 3.40E-09 | 0.138437   | 7.12E-06    |
| phe.Fasting_rs7657672 | S8 | CLCN3 | rs148423011 S7  | DIAPH1      | 5.92E-14 | 2.42E-06   | 1.38E-10 | 3.40E-09 | 0.138437   | 7.12E-06    |
| phe.Fasting_rs7657672 | S8 | CLCN3 | rs149019627 S8  | DIAPH1      | 1.50E-14 | 6.14E-07   | 3.79E-11 | 4.55E-10 | 0.0185068  | 1.19E-06    |
| phe.Fasting_rs7657672 | S8 | CLCN3 | rs149075406 S8  | DIAPH1      | 5.92E-14 | 2.42E-06   | 1.38E-10 | 3.40E-09 | 0.138437   | 7.12E-06    |
| phe.Fasting_rs7657672 | S8 | CLCN3 | rs149334783 S8  | DIAPH1      | 5.92E-14 | 2.42E-06   | 1.38E-10 | 3.40E-09 | 0.138437   | 7.12E-06    |
| phe.Fasting_rs7657672 | S8 | CLCN3 | rs149553852 S21 | "PCDHGA10,  | 1.70E-09 | 0.0692363  | 1.79E-06 | 2.93E-07 | 1          | 0.000371172 |
| phe.Fasting_rs7657672 | S8 | CLCN3 | rs149716949 S5  | DIAPH1      | 4.05E-15 | 1.65E-07   | 1.07E-11 | 3.47E-10 | 0.0141127  | 9.20E-07    |
| phe.Fasting_rs7657672 | S8 | CLCN3 | rs149791570 S5  | DIAPH1      | 1.50E-14 | 6.14E-07   | 3.79E-11 | 4.55E-10 | 0.0185068  | 1.19E-06    |
| phe.Fasting_rs7657672 | S8 | CLCN3 | rs150452206 S13 | "DIAPH1,LOC | 5.92E-14 | 2.42E-06   | 1.38E-10 | 3.40E-09 | 0.138437   | 7.12E-06    |
| phe.Fasting_rs7657672 | S8 | CLCN3 | rs150675915 S7  | DIAPH1      | 5.92E-14 | 2.42E-06   | 1.38E-10 | 3.40E-09 | 0.138437   | 7.12E-06    |
| phe.Fasting_rs7657672 | S8 | CLCN3 | rs150765570 S7  | DIAPH1      | 5.92E-14 | 2.42E-06   | 1.38E-10 | 3.40E-09 | 0.138437   | 7.12E-06    |
| phe.Fasting_rs7657672 | S8 | CLCN3 | rs150916187 S4  | HIST1H2BK   | 6.33E-09 | 0.258364   | 6.11E-06 | 9.19E-08 | 1          | 0.000131237 |
| phe.Fasting_rs7657672 | S8 | CLCN3 | rs150992994 S11 | "PCDHGA5,PI | 5.39E-14 | 2.20E-06   | 1.26E-10 | 3.35E-09 | 0.136462   | 7.04E-06    |
| phe.Fasting_rs7657672 | S8 | CLCN3 | rs151204700 S8  | DIAPH1      | 5.92E-14 | 2.42E-06   | 1.38E-10 | 3.40E-09 | 0.138437   | 7.12E-06    |
| phe.Fasting_rs7657672 | S8 | CLCN3 | rs151330468 S8  | DIAPH1      | 1.50E-14 | 6.14E-07   | 3.79E-11 | 6.23E-10 | 0.0253393  | 1.57E-06    |
| phe.Fasting_rs7657672 | S8 | CLCN3 | rs16894241 S4   | HIST1H2BK   | 2.55E-11 | 0.00104094 | 3.69E-08 | 1.75E-07 | 1          | 0.000235061 |
| phe.Fasting_rs7657672 | S8 | CLCN3 | rs180772028 S8  | "DIAPH1,LOC | 5.92E-14 | 2.42E-06   | 1.38E-10 | 3.40E-09 | 0.138437   | 7.12E-06    |
| phe.Fasting_rs7657672 | S8 | CLCN3 | rs181224861 S7  | DIAPH1      | 5.92E-14 | 2.42E-06   | 1.38E-10 | 3.40E-09 | 0.138437   | 7.12E-06    |
| phe.Fasting_rs7657672 | S8 | CLCN3 | rs181247960 S21 | "PCDHGA9,PI | 1.70E-09 | 0.0692363  | 1.79E-06 | 2.93E-07 | 1          | 0.000371172 |
| phe.Fasting_rs7657672 | S8 | CLCN3 | rs181824655 S21 | "PCDHGB6,PI | 1.70E-09 | 0.0692363  | 1.79E-06 | 2.93E-07 | 1          | 0.000371172 |
| phe.Fasting_rs7657672 | S8 | CLCN3 | rs182714699 S8  | DIAPH1      | 5.92E-14 | 2.42E-06   | 1.38E-10 | 3.40E-09 | 0.138437   | 7.12E-06    |
| phe.Fasting_rs7657672 | S8 | CLCN3 | rs182965141 S8  | DIAPH1      | 1.81E-14 | 7.38E-07   | 4.52E-11 | 1.47E-10 | 0.00598212 | 4.39E-07    |
| phe.Fasting_rs7657672 | S8 | CLCN3 | rs183597049 S7  | DIAPH1      | 5.92E-14 | 2.42E-06   | 1.38E-10 | 3.40E-09 | 0.138437   | 7.12E-06    |
| phe.Fasting_rs7657672 | S8 | CLCN3 | rs183980988 S2  | NA          | 5.92E-14 | 2.42E-06   | 1.38E-10 | 3.40E-09 | 0.138437   | 7.12E-06    |
| phe.Fasting_rs7657672 | S8 | CLCN3 | rs184233232 S7  | DIAPH1      | 5.92E-14 | 2.42E-06   | 1.38E-10 | 3.40E-09 | 0.138437   | 7.12E-06    |
| phe.Fasting_rs7657672 | S8 | CLCN3 | rs184509477 S13 | "PCDHGB4,PI | 5.92E-14 | 2.42E-06   | 1.38E-10 | 3.40E-09 | 0.138437   | 7.12E-06    |
| phe.Fasting_rs7657672 | S8 | CLCN3 | rs185069296 S15 | "LOC1005056 | 5.92E-14 | 2.42E-06   | 1.38E-10 | 3.40E-09 | 0.138437   | 7.12E-06    |
| phe.Fasting_rs7657672 | S8 | CLCN3 | rs185502834 S8  | DIAPH1      | 1.50E-14 | 6.14E-07   | 3.79E-11 | 4.55E-10 | 0.0185068  | 1.19E-06    |
| phe.Fasting_rs7657672 | S8 | CLCN3 | rs185759881 S7  | DIAPH1      | 5.92E-14 | 2.42E-06   | 1.38E-10 | 3.40E-09 | 0.138437   | 7.12E-06    |
| phe.Fasting_rs7657672 | S8 | CLCN3 | rs186288044 S21 | "PCDHGB4,PI | 1.70E-09 | 0.0692363  | 1.79E-06 | 2.93E-07 | 1          | 0.000371172 |
| phe.Fasting_rs7657672 | S8 | CLCN3 | rs187000011 S11 | DIAPH1      | 5.92E-14 | 2.42E-06   | 1.38E-10 | 3.40E-09 | 0.138437   | 7.12E-06    |
| phe.Fasting_rs7657672 | S8 | CLCN3 | rs188981295 S5  | "RPS27AP10, | 5.92E-14 | 2.42E-06   | 1.38E-10 | 3.40E-09 | 0.138437   | 7.12E-06    |
| phe.Fasting_rs7657672 | S8 | CLCN3 | rs190559574 S7  | DIAPH1      | 1.50E-14 | 6.14E-07   | 3.79E-11 | 4.55E-10 | 0.0185068  | 1.19E-06    |
| phe.Fasting_rs7657672 | S8 | CLCN3 | rs191544043 S8  | DIAPH1      | 5.92E-14 | 2.42E-06   | 1.38E-10 | 3.40E-09 | 0.138437   | 7.12E-06    |
| phe.Fasting_rs7657672 | S8 | CLCN3 | rs191766712 S7  | DIAPH1      | 5.92E-14 | 2.42E-06   | 1.38E-10 | 3.40E-09 | 0.138437   | 7.12E-06    |
| phe.Fasting_rs7657672 | S8 | CLCN3 | rs192690040 S7  | DIAPH1      | 5.92E-14 | 2.42E-06   | 1.38E-10 | 3.40E-09 | 0.138437   | 7.12E-06    |
| phe.Fasting_rs7657672 | S8 | CLCN3 | rs192765219 S7  | DIAPH1      | 5.92E-14 | 2.42E-06   | 1.38E-10 | 3.40E-09 | 0.138437   | 7.12E-06    |

|                        |    |           |                 |             |          |             |             |          |            |             |
|------------------------|----|-----------|-----------------|-------------|----------|-------------|-------------|----------|------------|-------------|
| phe.Fasting_rs7657672  | S8 | CLCN3     | rs192770525 S7  | DIAPH1      | 5.92E-14 | 2.42E-06    | 1.38E-10    | 3.40E-09 | 0.138437   | 7.12E-06    |
| phe.Fasting_rs7657672  | S8 | CLCN3     | rs35990401 S7   | DIAPH1      | 8.29E-14 | 3.39E-06    | 1.90E-10    | 1.21E-09 | 0.0491666  | 2.82E-06    |
| phe.Fasting_rs7657672  | S8 | CLCN3     | rs55900860 S7   | DIAPH1      | 1.50E-14 | 6.14E-07    | 3.79E-11    | 4.55E-10 | 0.0185068  | 1.19E-06    |
| phe.Fasting_rs7657672  | S8 | CLCN3     | rs57503635 S3   | NA          | 5.88E-13 | 2.40E-05    | 1.24E-09    | 4.68E-06 | 1          | 0.00433199  |
| phe.Fasting_rs7657672  | S8 | CLCN3     | rs6881310 S23   | ISL1        | 3.07E-12 | 1.26E-04    | 5.63E-09    | 7.01E-11 | 0.00285495 | 2.20E-07    |
| phe.Fasting_rs7657672  | S8 | CLCN3     | rs77444916 S23  | LOC642366   | 1.23E-16 | 5.01E-09    | 5.00E-13    | 5.32E-13 | 2.17E-05   | 2.65E-09    |
| phe.Fasting_rs7657672  | S8 | CLCN3     | rs79517926 S15  | "DIAPH1,LOC | 2.16E-12 | 8.81E-05    | 4.05E-09    | 6.09E-09 | 0.248026   | 1.18E-05    |
| phe.Fasting_rs7657672  | S8 | CLCN3     | rs80258830 S24  | LOC642366   | 1.23E-16 | 5.01E-09    | 5.00E-13    | 5.32E-13 | 2.17E-05   | 2.65E-09    |
| phe.Fasting_rs76737663 | S1 | LOC654841 | rs113357907 S24 | ISL1        | 8.66E-18 | 3.54E-10    | 8.94E-14    | 1.18E-09 | 0.0480121  | 2.76E-06    |
| phe.Fasting_rs76737663 | S1 | LOC654841 | rs116011837 S9  | BRD2        | 2.83E-06 | 1.00E+00    | 1.50E-03    | 2.83E-13 | 1.15E-05   | 1.55E-09    |
| phe.Fasting_rs76737663 | S1 | LOC654841 | rs116120727 S9  | BRD2        | 2.83E-06 | 1           | 1.50E-03    | 2.83E-13 | 1.15E-05   | 1.55E-09    |
| phe.Fasting_rs76737663 | S1 | LOC654841 | rs139070959 S8  | RPN2        | 1.39E-17 | 5.66E-10    | 1.13E-13    | 3.89E-10 | 0.0158517  | 1.03E-06    |
| phe.Fasting_rs76737663 | S1 | LOC654841 | rs141926074 S8  | ATE1        | 2.67E-07 | 1           | 0.000185731 | 2.73E-09 | 0.111071   | 5.83E-06    |
| phe.Fasting_rs76737663 | S1 | LOC654841 | rs145412529 S8  | "RBL1,RPS3A | 8.15E-18 | 3.33E-10    | 8.69E-14    | 4.36E-10 | 0.0177509  | 1.14E-06    |
| phe.Fasting_rs76737663 | S1 | LOC654841 | rs150916187 S4  | HIST1H2BK   | 6.55E-07 | 1           | 0.000417265 | 1.27E-12 | 5.17E-05   | 5.81E-09    |
| phe.Fasting_rs76737663 | S1 | LOC654841 | rs16894241 S4   | HIST1H2BK   | 9.52E-07 | 1           | 5.80E-04    | 3.33E-12 | 0.00013541 | 1.40E-08    |
| phe.Fasting_rs76737663 | S1 | LOC654841 | rs2153597 S8    | ZNF438      | 6.23E-11 | 0.00254533  | 8.35E-08    | 9.31E-06 | 1          | 0.00769393  |
| phe.Fasting_rs76737663 | S1 | LOC654841 | rs57503635 S3   | NA          | 1.33E-16 | 5.42E-09    | 5.30E-13    | 2.03E-32 | 8.25E-25   | 4.52E-25    |
| phe.Fasting_rs76737663 | S1 | LOC654841 | rs6881310 S23   | ISL1        | 8.47E-17 | 3.46E-09    | 3.69E-13    | 1.35E-06 | 1          | 0.00147973  |
| phe.Fasting_rs76737663 | S1 | LOC654841 | rs77444916 S23  | LOC642366   | 2.88E-17 | 1.18E-09    | 1.66E-13    | 1.13E-09 | 0.0459109  | 2.66E-06    |
| phe.Fasting_rs76737663 | S1 | LOC654841 | rs77845645 S21  | NA          | 3.06E-17 | 1.25E-09    | 1.73E-13    | 6.01E-07 | 1          | 0.000708936 |
| phe.Fasting_rs76737663 | S1 | LOC654841 | rs80258830 S24  | LOC642366   | 2.88E-17 | 1.18E-09    | 1.66E-13    | 1.13E-09 | 0.0459109  | 2.66E-06    |
| phe.Fasting_rs7675011  | S8 | NEK1      | rs112027720 S7  | DIAPH1      | 9.17E-12 | 0.000374383 | 1.48E-08    | 3.09E-08 | 1          | 4.98E-05    |
| phe.Fasting_rs7675011  | S8 | NEK1      | rs112089881 S8  | ZFAND4      | 1.84E-18 | 7.51E-11    | 3.89E-14    | 7.39E-09 | 0.300904   | 1.42E-05    |
| phe.Fasting_rs7675011  | S8 | NEK1      | rs113219478 S7  | DIAPH1      | 9.17E-12 | 0.000374383 | 1.48E-08    | 3.09E-08 | 1          | 4.98E-05    |
| phe.Fasting_rs7675011  | S8 | NEK1      | rs113357907 S24 | ISL1        | 6.12E-18 | 2.50E-10    | 7.50E-14    | 1.27E-15 | 5.16E-08   | 1.44E-11    |
| phe.Fasting_rs7675011  | S8 | NEK1      | rs115787552 S5  | KPNA3       | 3.50E-16 | 1.43E-08    | 1.15E-12    | 3.13E-07 | 1          | 0.000393894 |
| phe.Fasting_rs7675011  | S8 | NEK1      | rs115888477 S8  | NA          | 2.70E-15 | 1.10E-07    | 7.57E-12    | 2.44E-08 | 0.994402   | 4.03E-05    |
| phe.Fasting_rs7675011  | S8 | NEK1      | rs116011837 S9  | BRD2        | 2.29E-17 | 9.34E-10    | 1.45E-13    | 3.18E-10 | 0.0129556  | 8.55E-07    |
| phe.Fasting_rs7675011  | S8 | NEK1      | rs116079984 S8  | KPNA3       | 3.50E-16 | 1.43E-08    | 1.15E-12    | 3.67E-07 | 1          | 0.000454306 |
| phe.Fasting_rs7675011  | S8 | NEK1      | rs116120727 S9  | BRD2        | 2.29E-17 | 9.34E-10    | 1.45E-13    | 3.18E-10 | 0.0129556  | 8.55E-07    |
| phe.Fasting_rs7675011  | S8 | NEK1      | rs116279995 S20 | "PCDHGA4,PI | 2.15E-05 | 1.00E+00    | 8.87E-03    | 3.33E-07 | 1          | 0.000415605 |
| phe.Fasting_rs7675011  | S8 | NEK1      | rs138090701 S5  | HDAC3       | 1.02E-12 | 4.17E-05    | 2.10E-09    | 1.93E-08 | 0.787129   | 3.33E-05    |
| phe.Fasting_rs7675011  | S8 | NEK1      | rs138136869 S7  | DIAPH1      | 1.65E-12 | 6.74E-05    | 3.16E-09    | 4.45E-09 | 0.180939   | 9.00E-06    |
| phe.Fasting_rs7675011  | S8 | NEK1      | rs138457103 S10 | DIAPH1      | 5.43E-12 | 0.000221795 | 9.60E-09    | 2.89E-08 | 1          | 4.72E-05    |
| phe.Fasting_rs7675011  | S8 | NEK1      | rs138487229 S11 | DIAPH1      | 9.17E-12 | 0.000374383 | 1.48E-08    | 3.09E-08 | 1          | 4.98E-05    |
| phe.Fasting_rs7675011  | S8 | NEK1      | rs138738950 S8  | "PCDHGB2,PI | 9.17E-12 | 0.000374383 | 1.48E-08    | 3.08E-08 | 1          | 4.98E-05    |
| phe.Fasting_rs7675011  | S8 | NEK1      | rs139297927 S8  | DIAPH1      | 9.17E-12 | 0.000374383 | 1.48E-08    | 3.09E-08 | 1          | 4.98E-05    |
| phe.Fasting_rs7675011  | S8 | NEK1      | rs139337303 S8  | DIAPH1      | 9.17E-12 | 0.000374383 | 1.48E-08    | 3.09E-08 | 1          | 4.98E-05    |
| phe.Fasting_rs7675011  | S8 | NEK1      | rs139403963 S8  | DIAPH1      | 1.65E-12 | 6.74E-05    | 3.16E-09    | 4.45E-09 | 0.180939   | 9.00E-06    |

|                       |    |      |                |             |          |             |             |          |          |             |
|-----------------------|----|------|----------------|-------------|----------|-------------|-------------|----------|----------|-------------|
| phe.Fasting_rs7675011 | S8 | NEK1 | rs139621309S18 | "LOC1005056 | 9.17E-12 | 0.000374383 | 1.48E-08    | 3.09E-08 | 1        | 4.98E-05    |
| phe.Fasting_rs7675011 | S8 | NEK1 | rs139828110S8  | DIAPH1      | 1.65E-12 | 6.74E-05    | 3.16E-09    | 4.45E-09 | 0.180939 | 9.00E-06    |
| phe.Fasting_rs7675011 | S8 | NEK1 | rs140070363S8  | DIAPH1      | 9.17E-12 | 0.000374383 | 1.48E-08    | 3.09E-08 | 1        | 4.98E-05    |
| phe.Fasting_rs7675011 | S8 | NEK1 | rs140644750S13 | DIAPH1      | 9.17E-12 | 0.000374383 | 1.48E-08    | 3.09E-08 | 1        | 4.98E-05    |
| phe.Fasting_rs7675011 | S8 | NEK1 | rs141022544S8  | DIAPH1      | 9.17E-12 | 0.000374383 | 1.48E-08    | 3.09E-08 | 1        | 4.98E-05    |
| phe.Fasting_rs7675011 | S8 | NEK1 | rs141525984S5  | DIAPH1      | 9.17E-12 | 0.000374383 | 1.48E-08    | 3.09E-08 | 1        | 4.98E-05    |
| phe.Fasting_rs7675011 | S8 | NEK1 | rs141926074S8  | ATE1        | 1.33E-06 | 1           | 0.000783423 | 2.84E-14 | 1.16E-06 | 2.14E-10    |
| phe.Fasting_rs7675011 | S8 | NEK1 | rs142480565S8  | DIAPH1      | 9.17E-12 | 0.000374383 | 1.48E-08    | 3.09E-08 | 1        | 4.98E-05    |
| phe.Fasting_rs7675011 | S8 | NEK1 | rs142718558S7  | "DIAPH1,LOC | 9.17E-12 | 0.000374383 | 1.48E-08    | 3.09E-08 | 1        | 4.98E-05    |
| phe.Fasting_rs7675011 | S8 | NEK1 | rs142789100S8  | DIAPH1      | 1.65E-12 | 6.74E-05    | 3.16E-09    | 4.45E-09 | 0.180939 | 9.00E-06    |
| phe.Fasting_rs7675011 | S8 | NEK1 | rs142812798S7  | DIAPH1      | 1.65E-12 | 6.74E-05    | 3.16E-09    | 4.45E-09 | 0.180939 | 9.00E-06    |
| phe.Fasting_rs7675011 | S8 | NEK1 | rs143377827S13 | "DIAPH1,LOC | 1.45E-12 | 5.90E-05    | 2.83E-09    | 3.66E-09 | 0.14914  | 7.58E-06    |
| phe.Fasting_rs7675011 | S8 | NEK1 | rs143691978S11 | DIAPH1      | 1.65E-12 | 6.74E-05    | 3.16E-09    | 6.99E-09 | 0.284722 | 1.35E-05    |
| phe.Fasting_rs7675011 | S8 | NEK1 | rs144081334S11 | DIAPH1      | 1.65E-12 | 6.74E-05    | 3.16E-09    | 6.99E-09 | 0.284722 | 1.35E-05    |
| phe.Fasting_rs7675011 | S8 | NEK1 | rs144613910S8  | DIAPH1      | 9.17E-12 | 0.000374383 | 1.48E-08    | 3.09E-08 | 1        | 4.98E-05    |
| phe.Fasting_rs7675011 | S8 | NEK1 | rs145027704S11 | DIAPH1      | 1.65E-12 | 6.74E-05    | 3.16E-09    | 6.99E-09 | 0.284722 | 1.35E-05    |
| phe.Fasting_rs7675011 | S8 | NEK1 | rs146220673S7  | DIAPH1      | 9.17E-12 | 0.000374383 | 1.48E-08    | 3.09E-08 | 1        | 4.98E-05    |
| phe.Fasting_rs7675011 | S8 | NEK1 | rs146622060S13 | DIAPH1      | 1.65E-12 | 6.74E-05    | 3.16E-09    | 6.99E-09 | 0.284722 | 1.35E-05    |
| phe.Fasting_rs7675011 | S8 | NEK1 | rs146815317S5  | KPNA3       | 3.50E-16 | 1.43E-08    | 1.15E-12    | 3.13E-07 | 1        | 0.000393894 |
| phe.Fasting_rs7675011 | S8 | NEK1 | rs146878162S7  | DIAPH1      | 9.17E-12 | 0.000374383 | 1.48E-08    | 3.09E-08 | 1        | 4.98E-05    |
| phe.Fasting_rs7675011 | S8 | NEK1 | rs1470889 S5   | ZC3H3       | 3.60E-08 | 1           | 3.04E-05    | 1.27E-06 | 1        | 0.00139597  |
| phe.Fasting_rs7675011 | S8 | NEK1 | rs1470890 S5   | ZC3H3       | 3.60E-08 | 1           | 3.04E-05    | 1.27E-06 | 1        | 0.00139597  |
| phe.Fasting_rs7675011 | S8 | NEK1 | rs147314451S8  | DIAPH1      | 9.17E-12 | 0.000374383 | 1.48E-08    | 3.09E-08 | 1        | 4.98E-05    |
| phe.Fasting_rs7675011 | S8 | NEK1 | rs147417996S7  | DIAPH1      | 1.65E-12 | 6.74E-05    | 3.16E-09    | 6.99E-09 | 0.284722 | 1.35E-05    |
| phe.Fasting_rs7675011 | S8 | NEK1 | rs147506725S21 | "PCDHGA1,Pi | 2.15E-05 | 1           | 8.87E-03    | 3.33E-07 | 1        | 0.000415605 |
| phe.Fasting_rs7675011 | S8 | NEK1 | rs147646948S7  | "LOC1005056 | 9.17E-12 | 0.000374383 | 1.48E-08    | 3.09E-08 | 1        | 4.98E-05    |
| phe.Fasting_rs7675011 | S8 | NEK1 | rs147677041S8  | DIAPH1      | 1.65E-12 | 6.74E-05    | 3.16E-09    | 4.45E-09 | 0.180939 | 9.00E-06    |
| phe.Fasting_rs7675011 | S8 | NEK1 | rs148116628S7  | DIAPH1      | 9.17E-12 | 0.000374383 | 1.48E-08    | 3.09E-08 | 1        | 4.98E-05    |
| phe.Fasting_rs7675011 | S8 | NEK1 | rs148423011S7  | DIAPH1      | 9.17E-12 | 0.000374383 | 1.48E-08    | 3.09E-08 | 1        | 4.98E-05    |
| phe.Fasting_rs7675011 | S8 | NEK1 | rs149019627S8  | DIAPH1      | 1.65E-12 | 6.74E-05    | 3.16E-09    | 4.45E-09 | 0.180939 | 9.00E-06    |
| phe.Fasting_rs7675011 | S8 | NEK1 | rs149075406S8  | DIAPH1      | 9.17E-12 | 0.000374383 | 1.48E-08    | 3.09E-08 | 1        | 4.98E-05    |
| phe.Fasting_rs7675011 | S8 | NEK1 | rs149334783S8  | DIAPH1      | 9.17E-12 | 0.000374383 | 1.48E-08    | 3.09E-08 | 1        | 4.98E-05    |
| phe.Fasting_rs7675011 | S8 | NEK1 | rs149553852S21 | "PCDHGA10,  | 2.15E-05 | 1           | 0.00887266  | 3.33E-07 | 1        | 0.000415605 |
| phe.Fasting_rs7675011 | S8 | NEK1 | rs149716949S5  | DIAPH1      | 7.67E-13 | 3.13E-05    | 1.59E-09    | 3.86E-09 | 0.15716  | 7.94E-06    |
| phe.Fasting_rs7675011 | S8 | NEK1 | rs149791570S5  | DIAPH1      | 1.65E-12 | 6.74E-05    | 3.16E-09    | 4.45E-09 | 0.180939 | 9.00E-06    |
| phe.Fasting_rs7675011 | S8 | NEK1 | rs150117838S8  | KPNA3       | 3.50E-16 | 1.43E-08    | 1.15E-12    | 3.00E-07 | 1        | 0.000378616 |
| phe.Fasting_rs7675011 | S8 | NEK1 | rs150452206S13 | "DIAPH1,LOC | 9.17E-12 | 0.000374383 | 1.48E-08    | 3.09E-08 | 1        | 4.98E-05    |
| phe.Fasting_rs7675011 | S8 | NEK1 | rs150675915S7  | DIAPH1      | 9.17E-12 | 0.000374383 | 1.48E-08    | 3.09E-08 | 1        | 4.98E-05    |
| phe.Fasting_rs7675011 | S8 | NEK1 | rs150765570S7  | DIAPH1      | 9.17E-12 | 0.000374383 | 1.48E-08    | 3.09E-08 | 1        | 4.98E-05    |
| phe.Fasting_rs7675011 | S8 | NEK1 | rs150992994S11 | "PCDHGA5,Pi | 9.47E-12 | 0.000386737 | 1.52E-08    | 2.95E-08 | 1        | 4.80E-05    |

|                       |    |      |             |     |             |          |             |            |          |             |             |
|-----------------------|----|------|-------------|-----|-------------|----------|-------------|------------|----------|-------------|-------------|
| phe.Fasting_rs7675011 | S8 | NEK1 | rs151204700 | S8  | DIAPH1      | 9.17E-12 | 0.000374383 | 1.48E-08   | 3.09E-08 | 1           | 4.98E-05    |
| phe.Fasting_rs7675011 | S8 | NEK1 | rs151330468 | S8  | DIAPH1      | 1.65E-12 | 6.74E-05    | 3.16E-09   | 6.99E-09 | 0.284722    | 1.35E-05    |
| phe.Fasting_rs7675011 | S8 | NEK1 | rs16894241  | S4  | HIST1H2BK   | 5.24E-08 | 1           | 4.28E-05   | 6.75E-07 | 1           | 0.000789743 |
| phe.Fasting_rs7675011 | S8 | NEK1 | rs180772028 | S8  | "DIAPH1,LOC | 9.17E-12 | 0.000374383 | 1.48E-08   | 3.09E-08 | 1           | 4.98E-05    |
| phe.Fasting_rs7675011 | S8 | NEK1 | rs181224861 | S7  | DIAPH1      | 9.17E-12 | 0.000374383 | 1.48E-08   | 3.09E-08 | 1           | 4.98E-05    |
| phe.Fasting_rs7675011 | S8 | NEK1 | rs181247960 | S21 | "PCDHGA9,PI | 2.15E-05 | 1           | 0.00887266 | 3.33E-07 | 1           | 0.000415605 |
| phe.Fasting_rs7675011 | S8 | NEK1 | rs181824655 | S21 | "PCDHGB6,PI | 2.15E-05 | 1           | 0.00887266 | 3.33E-07 | 1           | 0.000415605 |
| phe.Fasting_rs7675011 | S8 | NEK1 | rs182714699 | S8  | DIAPH1      | 9.17E-12 | 0.000374383 | 1.48E-08   | 3.09E-08 | 1           | 4.98E-05    |
| phe.Fasting_rs7675011 | S8 | NEK1 | rs182965141 | S8  | DIAPH1      | 2.01E-12 | 8.19E-05    | 3.80E-09   | 2.45E-09 | 0.0995578   | 5.28E-06    |
| phe.Fasting_rs7675011 | S8 | NEK1 | rs183597049 | S7  | DIAPH1      | 9.17E-12 | 0.000374383 | 1.48E-08   | 3.09E-08 | 1           | 4.98E-05    |
| phe.Fasting_rs7675011 | S8 | NEK1 | rs183980988 | S2  | NA          | 9.17E-12 | 0.000374383 | 1.48E-08   | 3.09E-08 | 1           | 4.98E-05    |
| phe.Fasting_rs7675011 | S8 | NEK1 | rs184233232 | S7  | DIAPH1      | 9.17E-12 | 0.000374383 | 1.48E-08   | 3.09E-08 | 1           | 4.98E-05    |
| phe.Fasting_rs7675011 | S8 | NEK1 | rs184509477 | S13 | "PCDHGB4,PI | 9.17E-12 | 0.000374383 | 1.48E-08   | 3.09E-08 | 1           | 4.98E-05    |
| phe.Fasting_rs7675011 | S8 | NEK1 | rs185069296 | S15 | "LOC1005056 | 9.17E-12 | 0.000374383 | 1.48E-08   | 3.09E-08 | 1           | 4.98E-05    |
| phe.Fasting_rs7675011 | S8 | NEK1 | rs185502834 | S8  | DIAPH1      | 1.65E-12 | 6.74E-05    | 3.16E-09   | 4.45E-09 | 0.180939    | 9.00E-06    |
| phe.Fasting_rs7675011 | S8 | NEK1 | rs185759881 | S7  | DIAPH1      | 9.17E-12 | 0.000374383 | 1.48E-08   | 3.09E-08 | 1           | 4.98E-05    |
| phe.Fasting_rs7675011 | S8 | NEK1 | rs186288044 | S21 | "PCDHGB4,PI | 2.15E-05 | 1           | 0.00887266 | 3.33E-07 | 1           | 0.000415605 |
| phe.Fasting_rs7675011 | S8 | NEK1 | rs187000011 | S11 | DIAPH1      | 9.17E-12 | 0.000374383 | 1.48E-08   | 3.09E-08 | 1           | 4.98E-05    |
| phe.Fasting_rs7675011 | S8 | NEK1 | rs188981295 | S5  | "RPS27AP10, | 9.17E-12 | 0.000374383 | 1.48E-08   | 3.09E-08 | 1           | 4.98E-05    |
| phe.Fasting_rs7675011 | S8 | NEK1 | rs190559574 | S7  | DIAPH1      | 1.65E-12 | 6.74E-05    | 3.16E-09   | 4.45E-09 | 0.180939    | 9.00E-06    |
| phe.Fasting_rs7675011 | S8 | NEK1 | rs191544043 | S8  | DIAPH1      | 9.17E-12 | 0.000374383 | 1.48E-08   | 3.09E-08 | 1           | 4.98E-05    |
| phe.Fasting_rs7675011 | S8 | NEK1 | rs191766712 | S7  | DIAPH1      | 9.17E-12 | 0.000374383 | 1.48E-08   | 3.09E-08 | 1           | 4.98E-05    |
| phe.Fasting_rs7675011 | S8 | NEK1 | rs192690040 | S7  | DIAPH1      | 9.17E-12 | 0.000374383 | 1.48E-08   | 3.09E-08 | 1           | 4.98E-05    |
| phe.Fasting_rs7675011 | S8 | NEK1 | rs192765219 | S7  | DIAPH1      | 9.17E-12 | 0.000374383 | 1.48E-08   | 3.09E-08 | 1           | 4.98E-05    |
| phe.Fasting_rs7675011 | S8 | NEK1 | rs192770525 | S7  | DIAPH1      | 9.17E-12 | 0.000374383 | 1.48E-08   | 3.09E-08 | 1           | 4.98E-05    |
| phe.Fasting_rs7675011 | S8 | NEK1 | rs2924507   | S5  | ZC3H3       | 3.60E-08 | 1           | 3.04E-05   | 1.27E-06 | 1           | 0.00139597  |
| phe.Fasting_rs7675011 | S8 | NEK1 | rs2924508   | S8  | ZC3H3       | 3.60E-08 | 1           | 3.04E-05   | 1.77E-06 | 1           | 0.00186217  |
| phe.Fasting_rs7675011 | S8 | NEK1 | rs2924511   | S7  | ZC3H3       | 3.60E-08 | 1           | 3.04E-05   | 1.08E-06 | 1           | 0.00121176  |
| phe.Fasting_rs7675011 | S8 | NEK1 | rs2924512   | S7  | ZC3H3       | 4.02E-08 | 1           | 3.37E-05   | 1.35E-06 | 1           | 0.00147188  |
| phe.Fasting_rs7675011 | S8 | NEK1 | rs2956376   | S8  | ZC3H3       | 3.60E-08 | 1           | 3.04E-05   | 7.36E-07 | 1           | 0.000853057 |
| phe.Fasting_rs7675011 | S8 | NEK1 | rs2980270   | S7  | ZC3H3       | 3.60E-08 | 1           | 3.04E-05   | 7.36E-07 | 1           | 0.000853057 |
| phe.Fasting_rs7675011 | S8 | NEK1 | rs2980272   | S7  | ZC3H3       | 4.02E-08 | 1           | 3.37E-05   | 1.41E-06 | 1           | 0.00153088  |
| phe.Fasting_rs7675011 | S8 | NEK1 | rs2980275   | S5  | ZC3H3       | 3.60E-08 | 1           | 3.04E-05   | 1.27E-06 | 1           | 0.00139597  |
| phe.Fasting_rs7675011 | S8 | NEK1 | rs35990401  | S7  | DIAPH1      | 8.40E-12 | 0.000343123 | 1.39E-08   | 1.16E-08 | 0.474122    | 2.13E-05    |
| phe.Fasting_rs7675011 | S8 | NEK1 | rs366767    | S5  | ZC3H3       | 6.34E-08 | 1           | 5.08E-05   | 7.89E-07 | 1           | 0.000909793 |
| phe.Fasting_rs7675011 | S8 | NEK1 | rs55900860  | S7  | DIAPH1      | 1.65E-12 | 6.74E-05    | 3.16E-09   | 4.45E-09 | 0.180939    | 9.00E-06    |
| phe.Fasting_rs7675011 | S8 | NEK1 | rs6881310   | S23 | ISL1        | 4.23E-17 | 1.73E-09    | 2.22E-13   | 3.40E-12 | 0.000138444 | 1.43E-08    |
| phe.Fasting_rs7675011 | S8 | NEK1 | rs73619637  | S8  | NA          | 1.02E-16 | 4.15E-09    | 4.31E-13   | 1.80E-08 | 0.733806    | 3.14E-05    |
| phe.Fasting_rs7675011 | S8 | NEK1 | rs77444916  | S23 | LOC642366   | 1.50E-17 | 6.11E-10    | 1.18E-13   | 1.19E-15 | 4.84E-08    | 1.36E-11    |
| phe.Fasting_rs7675011 | S8 | NEK1 | rs77798597  | S7  | KPNA3       | 3.50E-16 | 1.43E-08    | 1.15E-12   | 3.00E-07 | 1           | 0.000378616 |



|                        |    |       |             |     |             |          |             |          |          |             |             |
|------------------------|----|-------|-------------|-----|-------------|----------|-------------|----------|----------|-------------|-------------|
| phe.Fasting_rs7675011  | S8 | NEK1  | rs78703708  | S7  | FAF2        | 9.25E-18 | 3.78E-10    | 9.24E-14 | 4.64E-07 | 1           | 0.000558314 |
| phe.Fasting_rs7675011  | S8 | NEK1  | rs78736524  | S5  | KPNA3       | 3.50E-16 | 1.43E-08    | 1.15E-12 | 3.13E-07 | 1           | 0.000393894 |
| phe.Fasting_rs7675011  | S8 | NEK1  | rs79517926  | S15 | "DIAPH1,LOC | 2.69E-12 | 0.000109672 | 4.97E-09 | 3.36E-09 | 0.136596    | 7.04E-06    |
| phe.Fasting_rs7675011  | S8 | NEK1  | rs79781495  | S8  | KPNA3       | 3.50E-16 | 1.43E-08    | 1.15E-12 | 3.00E-07 | 1           | 0.000378616 |
| phe.Fasting_rs7675011  | S8 | NEK1  | rs80258830  | S24 | LOC642366   | 1.50E-17 | 6.11E-10    | 1.18E-13 | 1.19E-15 | 4.84E-08    | 1.36E-11    |
| phe.Fasting_rs7675011  | S8 | NEK1  | rs80332465  | S5  | KPNA3       | 3.75E-16 | 1.53E-08    | 1.22E-12 | 3.13E-07 | 1           | 0.000393227 |
| phe.Fasting_rs7675011  | S8 | NEK1  | rs80334773  | S5  | KPNA3       | 3.75E-16 | 1.53E-08    | 1.22E-12 | 3.13E-07 | 1           | 0.000393227 |
| phe.Fasting_rs76844308 | S8 | CNTLN | rs112348319 | S8  | SPTLC1      | 4.41E-10 | 0.0180199   | 5.08E-07 | 2.34E-07 | 1           | 0.000304136 |
| phe.Fasting_rs76844308 | S8 | CNTLN | rs112608164 | S8  | SPTLC1      | 4.41E-10 | 0.0180199   | 5.08E-07 | 2.34E-07 | 1           | 0.000304136 |
| phe.Fasting_rs76844308 | S8 | CNTLN | rs113568654 | S12 | SPTLC1      | 3.78E-10 | 0.0154527   | 4.42E-07 | 1.90E-06 | 1           | 0.00198179  |
| phe.Fasting_rs76844308 | S8 | CNTLN | rs115083290 | S19 | NA          | 1.78E-09 | 0.0725394   | 1.87E-06 | 4.41E-17 | 1.80E-09    | 3.55E-12    |
| phe.Fasting_rs76844308 | S8 | CNTLN | rs115752779 | S19 | NA          | 1.78E-09 | 0.0725394   | 1.87E-06 | 4.41E-17 | 1.80E-09    | 3.55E-12    |
| phe.Fasting_rs76844308 | S8 | CNTLN | rs139070959 | S8  | RPN2        | 3.76E-18 | 1.54E-10    | 5.76E-14 | 3.24E-12 | 0.000131982 | 1.37E-08    |
| phe.Fasting_rs76844308 | S8 | CNTLN | rs145412529 | S8  | "RBL1,RPS3A | 2.13E-18 | 8.71E-11    | 4.27E-14 | 3.80E-10 | 0.0154792   | 1.00E-06    |
| phe.Fasting_rs76844308 | S8 | CNTLN | rs57503635  | S3  | NA          | 4.62E-17 | 1.89E-09    | 2.34E-13 | 6.15E-16 | 2.50E-08    | 1.16E-11    |
| phe.Fasting_rs76844308 | S8 | CNTLN | rs60011869  | S16 | NA          | 8.87E-08 | 1           | 6.85E-05 | 1.39E-07 | 1           | 0.00019094  |
| phe.Fasting_rs76844308 | S8 | CNTLN | rs76542405  | S5  | SPTLC1      | 4.41E-10 | 0.0180199   | 5.08E-07 | 2.34E-07 | 1           | 0.000304136 |
| phe.Fasting_rs76844308 | S8 | CNTLN | rs77523818  | S7  | SPTLC1      | 4.41E-10 | 0.0180199   | 5.08E-07 | 2.34E-07 | 1           | 0.000304136 |
| phe.Fasting_rs76844308 | S8 | CNTLN | rs78516788  | S8  | SLC38A1     | 3.17E-18 | 1.29E-10    | 5.39E-14 | 4.88E-08 | 1           | 7.52E-05    |
| phe.Fasting_rs7690583  | S8 | NEK1  | rs112027720 | S7  | DIAPH1      | 9.17E-12 | 0.000374383 | 1.48E-08 | 2.32E-08 | 0.942747    | 3.85E-05    |
| phe.Fasting_rs7690583  | S8 | NEK1  | rs112089881 | S8  | ZFAND4      | 1.84E-18 | 7.51E-11    | 3.89E-14 | 5.69E-09 | 0.231497    | 1.11E-05    |
| phe.Fasting_rs7690583  | S8 | NEK1  | rs113219478 | S7  | DIAPH1      | 9.17E-12 | 0.000374383 | 1.48E-08 | 2.32E-08 | 0.942747    | 3.85E-05    |
| phe.Fasting_rs7690583  | S8 | NEK1  | rs113357907 | S24 | ISL1        | 6.12E-18 | 2.50E-10    | 7.50E-14 | 8.90E-16 | 3.62E-08    | 1.16E-11    |
| phe.Fasting_rs7690583  | S8 | NEK1  | rs115787552 | S5  | KPNA3       | 3.50E-16 | 1.43E-08    | 1.15E-12 | 2.22E-07 | 1           | 0.000289987 |
| phe.Fasting_rs7690583  | S8 | NEK1  | rs115888477 | S8  | NA          | 2.70E-15 | 1.10E-07    | 7.57E-12 | 1.69E-08 | 0.68669     | 2.95E-05    |
| phe.Fasting_rs7690583  | S8 | NEK1  | rs116011837 | S9  | BRD2        | 2.29E-17 | 9.34E-10    | 1.45E-13 | 2.23E-10 | 0.00906089  | 6.23E-07    |
| phe.Fasting_rs7690583  | S8 | NEK1  | rs116079984 | S8  | KPNA3       | 3.50E-16 | 1.43E-08    | 1.15E-12 | 2.60E-07 | 1           | 0.000333919 |
| phe.Fasting_rs7690583  | S8 | NEK1  | rs116120727 | S9  | BRD2        | 2.29E-17 | 9.34E-10    | 1.45E-13 | 2.23E-10 | 0.00906089  | 6.23E-07    |
| phe.Fasting_rs7690583  | S8 | NEK1  | rs116279995 | S20 | "PCDHGA4,PI | 2.15E-05 | 1           | 8.87E-03 | 2.44E-07 | 1           | 0.00031541  |
| phe.Fasting_rs7690583  | S8 | NEK1  | rs138090701 | S5  | HDAC3       | 1.02E-12 | 4.17E-05    | 2.10E-09 | 1.39E-08 | 0.565314    | 2.49E-05    |
| phe.Fasting_rs7690583  | S8 | NEK1  | rs138136869 | S7  | DIAPH1      | 1.65E-12 | 6.74E-05    | 3.16E-09 | 3.13E-09 | 0.127325    | 6.59E-06    |
| phe.Fasting_rs7690583  | S8 | NEK1  | rs138457103 | S10 | DIAPH1      | 5.43E-12 | 0.000221795 | 9.60E-09 | 2.17E-08 | 0.884483    | 3.70E-05    |
| phe.Fasting_rs7690583  | S8 | NEK1  | rs138487229 | S11 | DIAPH1      | 9.17E-12 | 0.000374383 | 1.48E-08 | 2.32E-08 | 0.942747    | 3.85E-05    |
| phe.Fasting_rs7690583  | S8 | NEK1  | rs138738950 | S8  | "PCDHGB2,PI | 9.17E-12 | 0.000374383 | 1.48E-08 | 2.31E-08 | 0.939094    | 3.85E-05    |
| phe.Fasting_rs7690583  | S8 | NEK1  | rs139297927 | S8  | DIAPH1      | 9.17E-12 | 0.000374383 | 1.48E-08 | 2.32E-08 | 0.942747    | 3.85E-05    |
| phe.Fasting_rs7690583  | S8 | NEK1  | rs139337303 | S8  | DIAPH1      | 9.17E-12 | 0.000374383 | 1.48E-08 | 2.32E-08 | 0.942747    | 3.85E-05    |
| phe.Fasting_rs7690583  | S8 | NEK1  | rs139403963 | S8  | DIAPH1      | 1.65E-12 | 6.74E-05    | 3.16E-09 | 3.13E-09 | 0.127325    | 6.59E-06    |
| phe.Fasting_rs7690583  | S8 | NEK1  | rs139621309 | S18 | "LOC1005050 | 9.17E-12 | 0.000374383 | 1.48E-08 | 2.32E-08 | 0.942747    | 3.85E-05    |
| phe.Fasting_rs7690583  | S8 | NEK1  | rs139828110 | S8  | DIAPH1      | 1.65E-12 | 6.74E-05    | 3.16E-09 | 3.13E-09 | 0.127325    | 6.59E-06    |
| phe.Fasting_rs7690583  | S8 | NEK1  | rs140070363 | S8  | DIAPH1      | 9.17E-12 | 0.000374383 | 1.48E-08 | 2.32E-08 | 0.942747    | 3.85E-05    |

|                       |    |      |                |             |          |             |             |          |          |             |
|-----------------------|----|------|----------------|-------------|----------|-------------|-------------|----------|----------|-------------|
| phe.Fasting_rs7690583 | S8 | NEK1 | rs140644750S13 | DIAPH1      | 9.17E-12 | 0.000374383 | 1.48E-08    | 2.32E-08 | 0.942747 | 3.85E-05    |
| phe.Fasting_rs7690583 | S8 | NEK1 | rs141022544S8  | DIAPH1      | 9.17E-12 | 0.000374383 | 1.48E-08    | 2.32E-08 | 0.942747 | 3.85E-05    |
| phe.Fasting_rs7690583 | S8 | NEK1 | rs141525984S5  | DIAPH1      | 9.17E-12 | 0.000374383 | 1.48E-08    | 2.32E-08 | 0.942747 | 3.85E-05    |
| phe.Fasting_rs7690583 | S8 | NEK1 | rs141926074S8  | ATE1        | 1.33E-06 | 1           | 0.000783423 | 2.03E-14 | 8.25E-07 | 1.62E-10    |
| phe.Fasting_rs7690583 | S8 | NEK1 | rs142480565S8  | DIAPH1      | 9.17E-12 | 0.000374383 | 1.48E-08    | 2.32E-08 | 0.942747 | 3.85E-05    |
| phe.Fasting_rs7690583 | S8 | NEK1 | rs142718558S7  | "DIAPH1,LOC | 9.17E-12 | 0.000374383 | 1.48E-08    | 2.32E-08 | 0.942747 | 3.85E-05    |
| phe.Fasting_rs7690583 | S8 | NEK1 | rs142789100S8  | DIAPH1      | 1.65E-12 | 6.74E-05    | 3.16E-09    | 3.13E-09 | 0.127325 | 6.59E-06    |
| phe.Fasting_rs7690583 | S8 | NEK1 | rs142812798S7  | DIAPH1      | 1.65E-12 | 6.74E-05    | 3.16E-09    | 3.13E-09 | 0.127325 | 6.59E-06    |
| phe.Fasting_rs7690583 | S8 | NEK1 | rs143377827S13 | "DIAPH1,LOC | 1.45E-12 | 5.90E-05    | 2.83E-09    | 2.58E-09 | 0.105219 | 5.55E-06    |
| phe.Fasting_rs7690583 | S8 | NEK1 | rs143691978S11 | DIAPH1      | 1.65E-12 | 6.74E-05    | 3.16E-09    | 5.09E-09 | 0.206989 | 1.01E-05    |
| phe.Fasting_rs7690583 | S8 | NEK1 | rs144081334S11 | DIAPH1      | 1.65E-12 | 6.74E-05    | 3.16E-09    | 5.09E-09 | 0.206989 | 1.01E-05    |
| phe.Fasting_rs7690583 | S8 | NEK1 | rs144613910S8  | DIAPH1      | 9.17E-12 | 0.000374383 | 1.48E-08    | 2.32E-08 | 0.942747 | 3.85E-05    |
| phe.Fasting_rs7690583 | S8 | NEK1 | rs145027704S11 | DIAPH1      | 1.65E-12 | 6.74E-05    | 3.16E-09    | 5.09E-09 | 0.206989 | 1.01E-05    |
| phe.Fasting_rs7690583 | S8 | NEK1 | rs146220673S7  | DIAPH1      | 9.17E-12 | 0.000374383 | 1.48E-08    | 2.32E-08 | 0.942747 | 3.85E-05    |
| phe.Fasting_rs7690583 | S8 | NEK1 | rs146622060S13 | DIAPH1      | 1.65E-12 | 6.74E-05    | 3.16E-09    | 5.09E-09 | 0.206989 | 1.01E-05    |
| phe.Fasting_rs7690583 | S8 | NEK1 | rs146815317S5  | KPNA3       | 3.50E-16 | 1.43E-08    | 1.15E-12    | 2.22E-07 | 1        | 0.000289987 |
| phe.Fasting_rs7690583 | S8 | NEK1 | rs146878162S7  | DIAPH1      | 9.17E-12 | 0.000374383 | 1.48E-08    | 2.32E-08 | 0.942747 | 3.85E-05    |
| phe.Fasting_rs7690583 | S8 | NEK1 | rs1470889 S5   | ZC3H3       | 3.60E-08 | 1           | 3.04E-05    | 7.22E-07 | 1        | 0.000838245 |
| phe.Fasting_rs7690583 | S8 | NEK1 | rs1470890 S5   | ZC3H3       | 3.60E-08 | 1           | 3.04E-05    | 7.22E-07 | 1        | 0.000838245 |
| phe.Fasting_rs7690583 | S8 | NEK1 | rs147314451S8  | DIAPH1      | 9.17E-12 | 0.000374383 | 1.48E-08    | 2.32E-08 | 0.942747 | 3.85E-05    |
| phe.Fasting_rs7690583 | S8 | NEK1 | rs147417996S7  | DIAPH1      | 1.65E-12 | 6.74E-05    | 3.16E-09    | 5.09E-09 | 0.206989 | 1.01E-05    |
| phe.Fasting_rs7690583 | S8 | NEK1 | rs147506725S21 | "PCDHGA1,Pi | 2.15E-05 | 1           | 8.87E-03    | 2.44E-07 | 1        | 0.00031541  |
| phe.Fasting_rs7690583 | S8 | NEK1 | rs147646948S7  | "LOC1005056 | 9.17E-12 | 0.000374383 | 1.48E-08    | 2.32E-08 | 0.942747 | 3.85E-05    |
| phe.Fasting_rs7690583 | S8 | NEK1 | rs147677041S8  | DIAPH1      | 1.65E-12 | 6.74E-05    | 3.16E-09    | 3.13E-09 | 0.127325 | 6.59E-06    |
| phe.Fasting_rs7690583 | S8 | NEK1 | rs148116628S7  | DIAPH1      | 9.17E-12 | 0.000374383 | 1.48E-08    | 2.32E-08 | 0.942747 | 3.85E-05    |
| phe.Fasting_rs7690583 | S8 | NEK1 | rs148423011S7  | DIAPH1      | 9.17E-12 | 0.000374383 | 1.48E-08    | 2.32E-08 | 0.942747 | 3.85E-05    |
| phe.Fasting_rs7690583 | S8 | NEK1 | rs149019627S8  | DIAPH1      | 1.65E-12 | 6.74E-05    | 3.16E-09    | 3.13E-09 | 0.127325 | 6.59E-06    |
| phe.Fasting_rs7690583 | S8 | NEK1 | rs149075406S8  | DIAPH1      | 9.17E-12 | 0.000374383 | 1.48E-08    | 2.32E-08 | 0.942747 | 3.85E-05    |
| phe.Fasting_rs7690583 | S8 | NEK1 | rs149334783S8  | DIAPH1      | 9.17E-12 | 0.000374383 | 1.48E-08    | 2.32E-08 | 0.942747 | 3.85E-05    |
| phe.Fasting_rs7690583 | S8 | NEK1 | rs149553852S21 | "PCDHGA10,I | 2.15E-05 | 1           | 0.00887266  | 2.44E-07 | 1        | 0.00031541  |
| phe.Fasting_rs7690583 | S8 | NEK1 | rs149716949S5  | DIAPH1      | 7.67E-13 | 3.13E-05    | 1.59E-09    | 2.82E-09 | 0.11499  | 6.01E-06    |
| phe.Fasting_rs7690583 | S8 | NEK1 | rs149791570S5  | DIAPH1      | 1.65E-12 | 6.74E-05    | 3.16E-09    | 3.13E-09 | 0.127325 | 6.59E-06    |
| phe.Fasting_rs7690583 | S8 | NEK1 | rs150117838S8  | KPNA3       | 3.50E-16 | 1.43E-08    | 1.15E-12    | 2.12E-07 | 1        | 0.000278281 |
| phe.Fasting_rs7690583 | S8 | NEK1 | rs150452206S13 | "DIAPH1,LOC | 9.17E-12 | 0.000374383 | 1.48E-08    | 2.32E-08 | 0.942747 | 3.85E-05    |
| phe.Fasting_rs7690583 | S8 | NEK1 | rs150675915S7  | DIAPH1      | 9.17E-12 | 0.000374383 | 1.48E-08    | 2.32E-08 | 0.942747 | 3.85E-05    |
| phe.Fasting_rs7690583 | S8 | NEK1 | rs150765570S7  | DIAPH1      | 9.17E-12 | 0.000374383 | 1.48E-08    | 2.32E-08 | 0.942747 | 3.85E-05    |
| phe.Fasting_rs7690583 | S8 | NEK1 | rs150992994S11 | "PCDHGA5,Pi | 9.47E-12 | 0.000386737 | 1.52E-08    | 2.23E-08 | 0.906871 | 3.74E-05    |
| phe.Fasting_rs7690583 | S8 | NEK1 | rs151204700S8  | DIAPH1      | 9.17E-12 | 0.000374383 | 1.48E-08    | 2.32E-08 | 0.942747 | 3.85E-05    |
| phe.Fasting_rs7690583 | S8 | NEK1 | rs151330468S8  | DIAPH1      | 1.65E-12 | 6.74E-05    | 3.16E-09    | 5.09E-09 | 0.206989 | 1.01E-05    |
| phe.Fasting_rs7690583 | S8 | NEK1 | rs16894241 S4  | HIST1H2BK   | 5.24E-08 | 1           | 4.28E-05    | 5.37E-07 | 1        | 0.000638224 |

|                       |    |      |             |     |             |          |             |            |          |           |             |
|-----------------------|----|------|-------------|-----|-------------|----------|-------------|------------|----------|-----------|-------------|
| phe.Fasting_rs7690583 | S8 | NEK1 | rs180772028 | S8  | "DIAPH1,LOC | 9.17E-12 | 0.000374383 | 1.48E-08   | 2.32E-08 | 0.942747  | 3.85E-05    |
| phe.Fasting_rs7690583 | S8 | NEK1 | rs181224861 | S7  | DIAPH1      | 9.17E-12 | 0.000374383 | 1.48E-08   | 2.32E-08 | 0.942747  | 3.85E-05    |
| phe.Fasting_rs7690583 | S8 | NEK1 | rs181247960 | S21 | "PCDHGA9,PI | 2.15E-05 | 1           | 0.00887266 | 2.44E-07 | 1         | 0.00031541  |
| phe.Fasting_rs7690583 | S8 | NEK1 | rs181824655 | S21 | "PCDHGB6,PI | 2.15E-05 | 1           | 0.00887266 | 2.44E-07 | 1         | 0.00031541  |
| phe.Fasting_rs7690583 | S8 | NEK1 | rs182714699 | S8  | DIAPH1      | 9.17E-12 | 0.000374383 | 1.48E-08   | 2.32E-08 | 0.942747  | 3.85E-05    |
| phe.Fasting_rs7690583 | S8 | NEK1 | rs182965141 | S8  | DIAPH1      | 2.01E-12 | 8.19E-05    | 3.80E-09   | 1.71E-09 | 0.0696643 | 3.83E-06    |
| phe.Fasting_rs7690583 | S8 | NEK1 | rs183597049 | S7  | DIAPH1      | 9.17E-12 | 0.000374383 | 1.48E-08   | 2.32E-08 | 0.942747  | 3.85E-05    |
| phe.Fasting_rs7690583 | S8 | NEK1 | rs183980988 | S2  | NA          | 9.17E-12 | 0.000374383 | 1.48E-08   | 2.32E-08 | 0.942747  | 3.85E-05    |
| phe.Fasting_rs7690583 | S8 | NEK1 | rs184233232 | S7  | DIAPH1      | 9.17E-12 | 0.000374383 | 1.48E-08   | 2.32E-08 | 0.942747  | 3.85E-05    |
| phe.Fasting_rs7690583 | S8 | NEK1 | rs184509477 | S13 | "PCDHGB4,PI | 9.17E-12 | 0.000374383 | 1.48E-08   | 2.32E-08 | 0.942747  | 3.85E-05    |
| phe.Fasting_rs7690583 | S8 | NEK1 | rs185069296 | S15 | "LOC1005056 | 9.17E-12 | 0.000374383 | 1.48E-08   | 2.32E-08 | 0.942747  | 3.85E-05    |
| phe.Fasting_rs7690583 | S8 | NEK1 | rs185502834 | S8  | DIAPH1      | 1.65E-12 | 6.74E-05    | 3.16E-09   | 3.13E-09 | 0.127325  | 6.59E-06    |
| phe.Fasting_rs7690583 | S8 | NEK1 | rs185759881 | S7  | DIAPH1      | 9.17E-12 | 0.000374383 | 1.48E-08   | 2.32E-08 | 0.942747  | 3.85E-05    |
| phe.Fasting_rs7690583 | S8 | NEK1 | rs186288044 | S21 | "PCDHGB4,PI | 2.15E-05 | 1           | 0.00887266 | 2.44E-07 | 1         | 0.00031541  |
| phe.Fasting_rs7690583 | S8 | NEK1 | rs187000011 | S11 | DIAPH1      | 9.17E-12 | 0.000374383 | 1.48E-08   | 2.32E-08 | 0.942747  | 3.85E-05    |
| phe.Fasting_rs7690583 | S8 | NEK1 | rs188981295 | S5  | "RPS27AP10, | 9.17E-12 | 0.000374383 | 1.48E-08   | 2.32E-08 | 0.942747  | 3.85E-05    |
| phe.Fasting_rs7690583 | S8 | NEK1 | rs190559574 | S7  | DIAPH1      | 1.65E-12 | 6.74E-05    | 3.16E-09   | 3.13E-09 | 0.127325  | 6.59E-06    |
| phe.Fasting_rs7690583 | S8 | NEK1 | rs191544043 | S8  | DIAPH1      | 9.17E-12 | 0.000374383 | 1.48E-08   | 2.32E-08 | 0.942747  | 3.85E-05    |
| phe.Fasting_rs7690583 | S8 | NEK1 | rs191766712 | S7  | DIAPH1      | 9.17E-12 | 0.000374383 | 1.48E-08   | 2.32E-08 | 0.942747  | 3.85E-05    |
| phe.Fasting_rs7690583 | S8 | NEK1 | rs192690040 | S7  | DIAPH1      | 9.17E-12 | 0.000374383 | 1.48E-08   | 2.32E-08 | 0.942747  | 3.85E-05    |
| phe.Fasting_rs7690583 | S8 | NEK1 | rs192765219 | S7  | DIAPH1      | 9.17E-12 | 0.000374383 | 1.48E-08   | 2.32E-08 | 0.942747  | 3.85E-05    |
| phe.Fasting_rs7690583 | S8 | NEK1 | rs192770525 | S7  | DIAPH1      | 9.17E-12 | 0.000374383 | 1.48E-08   | 2.32E-08 | 0.942747  | 3.85E-05    |
| phe.Fasting_rs7690583 | S8 | NEK1 | rs2924507   | S5  | ZC3H3       | 3.60E-08 | 1           | 3.04E-05   | 7.22E-07 | 1         | 0.000838245 |
| phe.Fasting_rs7690583 | S8 | NEK1 | rs2924508   | S8  | ZC3H3       | 3.60E-08 | 1           | 3.04E-05   | 1.01E-06 | 1         | 0.00114263  |
| phe.Fasting_rs7690583 | S8 | NEK1 | rs2924511   | S7  | ZC3H3       | 3.60E-08 | 1           | 3.04E-05   | 6.12E-07 | 1         | 0.000721385 |
| phe.Fasting_rs7690583 | S8 | NEK1 | rs2924512   | S7  | ZC3H3       | 4.02E-08 | 1           | 3.37E-05   | 7.64E-07 | 1         | 0.000882892 |
| phe.Fasting_rs7690583 | S8 | NEK1 | rs2956376   | S8  | ZC3H3       | 3.60E-08 | 1           | 3.04E-05   | 4.13E-07 | 1         | 0.000502027 |
| phe.Fasting_rs7690583 | S8 | NEK1 | rs2980270   | S7  | ZC3H3       | 3.60E-08 | 1           | 3.04E-05   | 4.13E-07 | 1         | 0.000502027 |
| phe.Fasting_rs7690583 | S8 | NEK1 | rs2980272   | S7  | ZC3H3       | 4.02E-08 | 1           | 3.37E-05   | 8.01E-07 | 1         | 0.000921735 |
| phe.Fasting_rs7690583 | S8 | NEK1 | rs2980275   | S5  | ZC3H3       | 3.60E-08 | 1           | 3.04E-05   | 7.22E-07 | 1         | 0.000838245 |
| phe.Fasting_rs7690583 | S8 | NEK1 | rs35990401  | S7  | DIAPH1      | 8.40E-12 | 0.000343123 | 1.39E-08   | 8.71E-09 | 0.354487  | 1.65E-05    |
| phe.Fasting_rs7690583 | S8 | NEK1 | rs366767    | S5  | ZC3H3       | 6.34E-08 | 1           | 5.08E-05   | 4.43E-07 | 1         | 0.000534886 |
| phe.Fasting_rs7690583 | S8 | NEK1 | rs55900860  | S7  | DIAPH1      | 1.65E-12 | 6.74E-05    | 3.16E-09   | 3.13E-09 | 0.127325  | 6.59E-06    |
| phe.Fasting_rs7690583 | S8 | NEK1 | rs6881310   | S23 | ISL1        | 4.23E-17 | 1.73E-09    | 2.22E-13   | 2.33E-12 | 9.47E-05  | 1.00E-08    |
| phe.Fasting_rs7690583 | S8 | NEK1 | rs73619637  | S8  | NA          | 1.02E-16 | 4.15E-09    | 4.31E-13   | 1.39E-08 | 0.566894  | 2.49E-05    |
| phe.Fasting_rs7690583 | S8 | NEK1 | rs77444916  | S23 | LOC642366   | 1.50E-17 | 6.11E-10    | 1.18E-13   | 8.34E-16 | 3.40E-08  | 1.16E-11    |
| phe.Fasting_rs7690583 | S8 | NEK1 | rs77798597  | S7  | KPNA3       | 3.50E-16 | 1.43E-08    | 1.15E-12   | 2.12E-07 | 1         | 0.000278281 |
| phe.Fasting_rs7690583 | S8 | NEK1 | rs78703708  | S7  | FAF2        | 9.25E-18 | 3.78E-10    | 9.24E-14   | 1.57E-07 | 1         | 0.000212577 |
| phe.Fasting_rs7690583 | S8 | NEK1 | rs78736524  | S5  | KPNA3       | 3.50E-16 | 1.43E-08    | 1.15E-12   | 2.22E-07 | 1         | 0.000289987 |
| phe.Fasting_rs7690583 | S8 | NEK1 | rs79517926  | S15 | "DIAPH1,LOC | 2.69E-12 | 0.000109672 | 4.97E-09   | 2.39E-09 | 0.0971596 | 5.17E-06    |

|                        |     |           |             |     |             |          |             |             |          |          |             |
|------------------------|-----|-----------|-------------|-----|-------------|----------|-------------|-------------|----------|----------|-------------|
| phe.Fasting_rs7690583  | S8  | NEK1      | rs79781495  | S8  | KPNA3       | 3.50E-16 | 1.43E-08    | 1.15E-12    | 2.12E-07 | 1        | 0.000278281 |
| phe.Fasting_rs7690583  | S8  | NEK1      | rs80258830  | S24 | LOC642366   | 1.50E-17 | 6.11E-10    | 1.18E-13    | 8.34E-16 | 3.40E-08 | 1.16E-11    |
| phe.Fasting_rs7690583  | S8  | NEK1      | rs80332465  | S5  | KPNA3       | 3.75E-16 | 1.53E-08    | 1.22E-12    | 2.21E-07 | 1        | 0.000289439 |
| phe.Fasting_rs7690583  | S8  | NEK1      | rs80334773  | S5  | KPNA3       | 3.75E-16 | 1.53E-08    | 1.22E-12    | 2.21E-07 | 1        | 0.000289439 |
| phe.Fasting_rs77444916 | S23 | LOC642366 | rs111576333 | S5  | TMEM64      | 3.76E-17 | 1.53E-09    | 2.04E-13    | 6.78E-15 | 2.76E-07 | 6.06E-11    |
| phe.Fasting_rs77444916 | S23 | LOC642366 | rs112027720 | S7  | DIAPH1      | 5.84E-06 | 1           | 2.86E-03    | 1.30E-13 | 5.29E-06 | 7.59E-10    |
| phe.Fasting_rs77444916 | S23 | LOC642366 | rs112089881 | S8  | ZFAND4      | 7.24E-08 | 1           | 5.70E-05    | 3.02E-16 | 1.23E-08 | 1.01E-11    |
| phe.Fasting_rs77444916 | S23 | LOC642366 | rs112091318 | S5  | TMEM64      | 1.13E-17 | 4.62E-10    | 1.02E-13    | 8.04E-15 | 3.27E-07 | 7.10E-11    |
| phe.Fasting_rs77444916 | S23 | LOC642366 | rs113219478 | S7  | DIAPH1      | 5.84E-06 | 1           | 0.0028563   | 1.30E-13 | 5.29E-06 | 7.59E-10    |
| phe.Fasting_rs77444916 | S23 | LOC642366 | rs113568654 | S12 | SPTLC1      | 1.61E-07 | 1           | 0.000117036 | 1.46E-13 | 5.95E-06 | 8.32E-10    |
| phe.Fasting_rs77444916 | S23 | LOC642366 | rs114334325 | S7  | AP3M2       | 1.30E-11 | 0.000530003 | 2.02E-08    | 4.93E-15 | 2.01E-07 | 4.56E-11    |
| phe.Fasting_rs77444916 | S23 | LOC642366 | rs114394395 | S7  | AP3M2       | 1.35E-11 | 0.00055115  | 2.09E-08    | 4.93E-15 | 2.01E-07 | 4.56E-11    |
| phe.Fasting_rs77444916 | S23 | LOC642366 | rs114565620 | S8  | RCL1        | 2.52E-17 | 1.03E-09    | 1.56E-13    | 5.48E-15 | 2.23E-07 | 5.01E-11    |
| phe.Fasting_rs77444916 | S23 | LOC642366 | rs115083290 | S19 | NA          | 1.64E-06 | 1           | 0.00094188  | 8.45E-16 | 3.44E-08 | 1.16E-11    |
| phe.Fasting_rs77444916 | S23 | LOC642366 | rs115305957 | S23 | NA          | 1.48E-17 | 6.03E-10    | 1.17E-13    | 3.16E-15 | 1.29E-07 | 3.03E-11    |
| phe.Fasting_rs77444916 | S23 | LOC642366 | rs115752779 | S19 | NA          | 1.64E-06 | 1           | 0.00094188  | 8.45E-16 | 3.44E-08 | 1.16E-11    |
| phe.Fasting_rs77444916 | S23 | LOC642366 | rs115787552 | S5  | KPNA3       | 2.72E-16 | 1.11E-08    | 9.14E-13    | 3.09E-14 | 1.26E-06 | 2.29E-10    |
| phe.Fasting_rs77444916 | S23 | LOC642366 | rs115888477 | S8  | NA          | 1.85E-15 | 7.54E-08    | 5.27E-12    | 5.33E-15 | 2.17E-07 | 4.88E-11    |
| phe.Fasting_rs77444916 | S23 | LOC642366 | rs116011837 | S9  | BRD2        | 2.31E-17 | 9.43E-10    | 1.46E-13    | 2.99E-13 | 1.22E-05 | 1.64E-09    |
| phe.Fasting_rs77444916 | S23 | LOC642366 | rs116079984 | S8  | KPNA3       | 2.72E-16 | 1.11E-08    | 9.14E-13    | 3.49E-14 | 1.42E-06 | 2.53E-10    |
| phe.Fasting_rs77444916 | S23 | LOC642366 | rs116120727 | S9  | BRD2        | 2.31E-17 | 9.43E-10    | 1.46E-13    | 2.99E-13 | 1.22E-05 | 1.64E-09    |
| phe.Fasting_rs77444916 | S23 | LOC642366 | rs116279995 | S20 | "PCDHGA4,PI | 9.01E-07 | 1           | 0.000551882 | 5.24E-14 | 2.13E-06 | 3.61E-10    |
| phe.Fasting_rs77444916 | S23 | LOC642366 | rs116406581 | S2  | NA          | 5.35E-11 | 0.00218631  | 7.23E-08    | 3.94E-15 | 1.60E-07 | 3.70E-11    |
| phe.Fasting_rs77444916 | S23 | LOC642366 | rs116548615 | S8  | TMEM45B     | 1.98E-17 | 8.10E-10    | 1.42E-13    | 6.84E-09 | 0.278458 | 1.32E-05    |
| phe.Fasting_rs77444916 | S23 | LOC642366 | rs116696844 | S3  | AP3M2       | 1.83E-11 | 0.000748556 | 2.76E-08    | 4.93E-15 | 2.01E-07 | 4.56E-11    |
| phe.Fasting_rs77444916 | S23 | LOC642366 | rs11989304  | S4  | TMEM64      | 3.76E-17 | 1.53E-09    | 2.04E-13    | 6.48E-15 | 2.64E-07 | 5.85E-11    |
| phe.Fasting_rs77444916 | S23 | LOC642366 | rs13353823  | S8  | MAST4       | 3.13E-07 | 1           | 0.00021558  | 6.70E-09 | 0.272905 | 1.30E-05    |
| phe.Fasting_rs77444916 | S23 | LOC642366 | rs138090701 | S5  | HDAC3       | 9.19E-07 | 1           | 0.000561939 | 1.17E-13 | 4.75E-06 | 7.06E-10    |
| phe.Fasting_rs77444916 | S23 | LOC642366 | rs138136869 | S7  | DIAPH1      | 1.45E-06 | 1           | 0.000846158 | 3.46E-14 | 1.41E-06 | 2.51E-10    |
| phe.Fasting_rs77444916 | S23 | LOC642366 | rs138457103 | S10 | DIAPH1      | 3.55E-06 | 1           | 0.00183746  | 1.24E-13 | 5.06E-06 | 7.37E-10    |
| phe.Fasting_rs77444916 | S23 | LOC642366 | rs138487229 | S11 | DIAPH1      | 5.84E-06 | 1           | 0.0028563   | 1.30E-13 | 5.29E-06 | 7.59E-10    |
| phe.Fasting_rs77444916 | S23 | LOC642366 | rs138738950 | S8  | "PCDHGB2,PI | 5.84E-06 | 1           | 2.86E-03    | 1.32E-13 | 5.37E-06 | 7.69E-10    |
| phe.Fasting_rs77444916 | S23 | LOC642366 | rs139297927 | S8  | DIAPH1      | 5.84E-06 | 1           | 2.86E-03    | 1.30E-13 | 5.29E-06 | 7.59E-10    |
| phe.Fasting_rs77444916 | S23 | LOC642366 | rs139337303 | S8  | DIAPH1      | 5.84E-06 | 1.00E+00    | 2.86E-03    | 1.30E-13 | 5.29E-06 | 7.59E-10    |
| phe.Fasting_rs77444916 | S23 | LOC642366 | rs139403963 | S8  | DIAPH1      | 1.45E-06 | 1.00E+00    | 8.46E-04    | 3.46E-14 | 1.41E-06 | 2.51E-10    |
| phe.Fasting_rs77444916 | S23 | LOC642366 | rs139621309 | S18 | "LOC1005056 | 5.84E-06 | 1.00E+00    | 2.86E-03    | 1.30E-13 | 5.29E-06 | 7.59E-10    |
| phe.Fasting_rs77444916 | S23 | LOC642366 | rs139828110 | S8  | DIAPH1      | 1.45E-06 | 1.00E+00    | 8.46E-04    | 3.46E-14 | 1.41E-06 | 2.51E-10    |
| phe.Fasting_rs77444916 | S23 | LOC642366 | rs140070363 | S8  | DIAPH1      | 5.84E-06 | 1.00E+00    | 2.86E-03    | 1.30E-13 | 5.29E-06 | 7.59E-10    |
| phe.Fasting_rs77444916 | S23 | LOC642366 | rs140524622 | S7  | MRPL10      | 3.60E-07 | 1.00E+00    | 2.45E-04    | 5.76E-15 | 2.34E-07 | 5.25E-11    |
| phe.Fasting_rs77444916 | S23 | LOC642366 | rs140644750 | S13 | DIAPH1      | 5.84E-06 | 1           | 0.0028563   | 1.30E-13 | 5.29E-06 | 7.59E-10    |

|                        |     |           |             |     |              |          |          |             |          |          |          |
|------------------------|-----|-----------|-------------|-----|--------------|----------|----------|-------------|----------|----------|----------|
| phe.Fasting_rs77444916 | S23 | LOC642366 | rs141022544 | S8  | DIAPH1       | 5.84E-06 | 1.00E+00 | 2.86E-03    | 1.30E-13 | 5.29E-06 | 7.59E-10 |
| phe.Fasting_rs77444916 | S23 | LOC642366 | rs141525984 | S5  | DIAPH1       | 5.84E-06 | 1.00E+00 | 2.86E-03    | 1.30E-13 | 5.29E-06 | 7.59E-10 |
| phe.Fasting_rs77444916 | S23 | LOC642366 | rs141692339 | S3  | "PCDHGA6,PI  | 1.11E-06 | 1        | 0.000664977 | 7.18E-14 | 2.92E-06 | 4.82E-10 |
| phe.Fasting_rs77444916 | S23 | LOC642366 | rs141926074 | S8  | ATE1         | 5.64E-18 | 2.30E-10 | 7.14E-14    | 8.39E-14 | 3.41E-06 | 5.61E-10 |
| phe.Fasting_rs77444916 | S23 | LOC642366 | rs142480565 | S8  | DIAPH1       | 5.84E-06 | 1.00E+00 | 2.86E-03    | 1.30E-13 | 5.29E-06 | 7.59E-10 |
| phe.Fasting_rs77444916 | S23 | LOC642366 | rs142718558 | S7  | "DIAPH1,LOC  | 5.84E-06 | 1.00E+00 | 2.86E-03    | 1.30E-13 | 5.29E-06 | 7.59E-10 |
| phe.Fasting_rs77444916 | S23 | LOC642366 | rs142789100 | S8  | DIAPH1       | 1.45E-06 | 1.00E+00 | 8.46E-04    | 3.46E-14 | 1.41E-06 | 2.51E-10 |
| phe.Fasting_rs77444916 | S23 | LOC642366 | rs142812798 | S7  | DIAPH1       | 1.45E-06 | 1.00E+00 | 8.46E-04    | 3.46E-14 | 1.41E-06 | 2.51E-10 |
| phe.Fasting_rs77444916 | S23 | LOC642366 | rs143377827 | S13 | "DIAPH1,LOC  | 1.51E-06 | 1        | 8.78E-04    | 2.83E-14 | 1.15E-06 | 2.13E-10 |
| phe.Fasting_rs77444916 | S23 | LOC642366 | rs143691978 | S11 | DIAPH1       | 1.45E-06 | 1.00E+00 | 8.46E-04    | 3.80E-14 | 1.55E-06 | 2.72E-10 |
| phe.Fasting_rs77444916 | S23 | LOC642366 | rs144081334 | S11 | DIAPH1       | 1.45E-06 | 1.00E+00 | 8.46E-04    | 3.80E-14 | 1.55E-06 | 2.72E-10 |
| phe.Fasting_rs77444916 | S23 | LOC642366 | rs144613910 | S8  | DIAPH1       | 5.84E-06 | 1.00E+00 | 2.86E-03    | 1.30E-13 | 5.29E-06 | 7.59E-10 |
| phe.Fasting_rs77444916 | S23 | LOC642366 | rs145027704 | S11 | DIAPH1       | 1.45E-06 | 1        | 8.46E-04    | 3.80E-14 | 1.55E-06 | 2.72E-10 |
| phe.Fasting_rs77444916 | S23 | LOC642366 | rs146220673 | S7  | DIAPH1       | 5.84E-06 | 1        | 2.86E-03    | 1.30E-13 | 5.29E-06 | 7.59E-10 |
| phe.Fasting_rs77444916 | S23 | LOC642366 | rs146622060 | S13 | DIAPH1       | 1.45E-06 | 1.00E+00 | 8.46E-04    | 3.80E-14 | 1.55E-06 | 2.72E-10 |
| phe.Fasting_rs77444916 | S23 | LOC642366 | rs146815317 | S5  | KPNA3        | 2.72E-16 | 1.11E-08 | 9.14E-13    | 3.09E-14 | 1.26E-06 | 2.29E-10 |
| phe.Fasting_rs77444916 | S23 | LOC642366 | rs146878162 | S7  | DIAPH1       | 5.84E-06 | 1        | 2.86E-03    | 1.30E-13 | 5.29E-06 | 7.59E-10 |
| phe.Fasting_rs77444916 | S23 | LOC642366 | rs1470889   | S5  | ZC3H3        | 3.47E-18 | 1.42E-10 | 5.60E-14    | 2.19E-13 | 8.93E-06 | 1.21E-09 |
| phe.Fasting_rs77444916 | S23 | LOC642366 | rs1470890   | S5  | ZC3H3        | 3.47E-18 | 1.42E-10 | 5.60E-14    | 2.19E-13 | 8.93E-06 | 1.21E-09 |
| phe.Fasting_rs77444916 | S23 | LOC642366 | rs147314451 | S8  | DIAPH1       | 5.84E-06 | 1        | 2.86E-03    | 1.30E-13 | 5.29E-06 | 7.59E-10 |
| phe.Fasting_rs77444916 | S23 | LOC642366 | rs147417996 | S7  | DIAPH1       | 1.45E-06 | 1        | 0.000846158 | 3.80E-14 | 1.55E-06 | 2.72E-10 |
| phe.Fasting_rs77444916 | S23 | LOC642366 | rs147506725 | S21 | "PCDHGA1,PI  | 9.01E-07 | 1        | 0.000551882 | 5.24E-14 | 2.13E-06 | 3.61E-10 |
| phe.Fasting_rs77444916 | S23 | LOC642366 | rs147646948 | S7  | "LOC1005056  | 5.84E-06 | 1        | 2.86E-03    | 1.30E-13 | 5.29E-06 | 7.59E-10 |
| phe.Fasting_rs77444916 | S23 | LOC642366 | rs147677041 | S8  | DIAPH1       | 1.45E-06 | 1        | 0.000846158 | 3.46E-14 | 1.41E-06 | 2.51E-10 |
| phe.Fasting_rs77444916 | S23 | LOC642366 | rs148116628 | S7  | DIAPH1       | 5.84E-06 | 1.00E+00 | 2.86E-03    | 1.30E-13 | 5.29E-06 | 7.59E-10 |
| phe.Fasting_rs77444916 | S23 | LOC642366 | rs148423011 | S7  | DIAPH1       | 5.84E-06 | 1        | 2.86E-03    | 1.30E-13 | 5.29E-06 | 7.59E-10 |
| phe.Fasting_rs77444916 | S23 | LOC642366 | rs149019627 | S8  | DIAPH1       | 1.45E-06 | 1        | 8.46E-04    | 3.46E-14 | 1.41E-06 | 2.51E-10 |
| phe.Fasting_rs77444916 | S23 | LOC642366 | rs149075406 | S8  | DIAPH1       | 5.84E-06 | 1        | 2.86E-03    | 1.30E-13 | 5.29E-06 | 7.59E-10 |
| phe.Fasting_rs77444916 | S23 | LOC642366 | rs149334783 | S8  | DIAPH1       | 5.84E-06 | 1.00E+00 | 2.86E-03    | 1.30E-13 | 5.29E-06 | 7.59E-10 |
| phe.Fasting_rs77444916 | S23 | LOC642366 | rs149553852 | S21 | "PCDHGA10,PI | 9.01E-07 | 1.00E+00 | 5.52E-04    | 5.24E-14 | 2.13E-06 | 3.61E-10 |
| phe.Fasting_rs77444916 | S23 | LOC642366 | rs149716949 | S5  | DIAPH1       | 8.44E-07 | 1        | 5.20E-04    | 1.62E-14 | 6.60E-07 | 1.36E-10 |
| phe.Fasting_rs77444916 | S23 | LOC642366 | rs149791570 | S5  | DIAPH1       | 1.45E-06 | 1        | 0.000846158 | 3.46E-14 | 1.41E-06 | 2.51E-10 |
| phe.Fasting_rs77444916 | S23 | LOC642366 | rs150117838 | S8  | KPNA3        | 2.72E-16 | 1.11E-08 | 9.14E-13    | 2.88E-14 | 1.17E-06 | 2.16E-10 |
| phe.Fasting_rs77444916 | S23 | LOC642366 | rs150452206 | S13 | "DIAPH1,LOC  | 5.84E-06 | 1        | 0.0028563   | 1.30E-13 | 5.29E-06 | 7.59E-10 |
| phe.Fasting_rs77444916 | S23 | LOC642366 | rs150675915 | S7  | DIAPH1       | 5.84E-06 | 1        | 0.0028563   | 1.30E-13 | 5.29E-06 | 7.59E-10 |
| phe.Fasting_rs77444916 | S23 | LOC642366 | rs150765570 | S7  | DIAPH1       | 5.84E-06 | 1        | 2.86E-03    | 1.30E-13 | 5.29E-06 | 7.59E-10 |
| phe.Fasting_rs77444916 | S23 | LOC642366 | rs150916187 | S4  | HIST1H2BK    | 5.42E-07 | 1        | 3.53E-04    | 6.03E-15 | 2.45E-07 | 5.47E-11 |
| phe.Fasting_rs77444916 | S23 | LOC642366 | rs150992994 | S11 | "PCDHGAS,PI  | 5.86E-06 | 1        | 2.86E-03    | 1.24E-13 | 5.04E-06 | 7.34E-10 |
| phe.Fasting_rs77444916 | S23 | LOC642366 | rs151204700 | S8  | DIAPH1       | 5.84E-06 | 1        | 2.86E-03    | 1.30E-13 | 5.29E-06 | 7.59E-10 |
| phe.Fasting_rs77444916 | S23 | LOC642366 | rs151330468 | S8  | DIAPH1       | 1.45E-06 | 1        | 8.46E-04    | 3.80E-14 | 1.55E-06 | 2.72E-10 |

|              |            |     |           |             |     |             |          |          |             |          |          |          |
|--------------|------------|-----|-----------|-------------|-----|-------------|----------|----------|-------------|----------|----------|----------|
| phe.Fasting_ | rs77444916 | S23 | LOC642366 | rs16894241  | S4  | HIST1H2BK   | 9.23E-07 | 1        | 5.64E-04    | 1.00E-14 | 4.07E-07 | 8.68E-11 |
| phe.Fasting_ | rs77444916 | S23 | LOC642366 | rs16908547  | S8  | PAG1        | 2.76E-08 | 1        | 2.39E-05    | 4.30E-13 | 1.75E-05 | 2.31E-09 |
| phe.Fasting_ | rs77444916 | S23 | LOC642366 | rs17494290  | S5  | CDH2        | 3.23E-19 | 1.32E-11 | 2.40E-14    | 2.27E-12 | 9.24E-05 | 9.79E-09 |
| phe.Fasting_ | rs77444916 | S23 | LOC642366 | rs180772028 | S8  | "DIAPH1,LOC | 5.84E-06 | 1        | 0.0028563   | 1.30E-13 | 5.29E-06 | 7.59E-10 |
| phe.Fasting_ | rs77444916 | S23 | LOC642366 | rs181224861 | S7  | DIAPH1      | 5.84E-06 | 1        | 0.0028563   | 1.30E-13 | 5.29E-06 | 7.59E-10 |
| phe.Fasting_ | rs77444916 | S23 | LOC642366 | rs181247960 | S21 | "PCDHGA9,PI | 9.01E-07 | 1        | 0.000551882 | 5.24E-14 | 2.13E-06 | 3.61E-10 |
| phe.Fasting_ | rs77444916 | S23 | LOC642366 | rs181824655 | S21 | "PCDHGB6,PI | 9.01E-07 | 1        | 5.52E-04    | 5.24E-14 | 2.13E-06 | 3.61E-10 |
| phe.Fasting_ | rs77444916 | S23 | LOC642366 | rs182714699 | S8  | DIAPH1      | 5.84E-06 | 1        | 2.86E-03    | 1.30E-13 | 5.29E-06 | 7.59E-10 |
| phe.Fasting_ | rs77444916 | S23 | LOC642366 | rs182958142 | S8  | DIAPH1      | 3.46E-06 | 1        | 1.80E-03    | 1.26E-14 | 5.14E-07 | 1.08E-10 |
| phe.Fasting_ | rs77444916 | S23 | LOC642366 | rs182965141 | S8  | DIAPH1      | 1.58E-06 | 1        | 9.11E-04    | 8.86E-15 | 3.61E-07 | 7.78E-11 |
| phe.Fasting_ | rs77444916 | S23 | LOC642366 | rs183597049 | S7  | DIAPH1      | 5.84E-06 | 1        | 2.86E-03    | 1.30E-13 | 5.29E-06 | 7.59E-10 |
| phe.Fasting_ | rs77444916 | S23 | LOC642366 | rs183980988 | S2  | NA          | 5.84E-06 | 1        | 2.86E-03    | 1.30E-13 | 5.29E-06 | 7.59E-10 |
| phe.Fasting_ | rs77444916 | S23 | LOC642366 | rs184233232 | S7  | DIAPH1      | 5.84E-06 | 1        | 2.86E-03    | 1.30E-13 | 5.29E-06 | 7.59E-10 |
| phe.Fasting_ | rs77444916 | S23 | LOC642366 | rs184509477 | S13 | "PCDHGB4,PI | 5.84E-06 | 1        | 2.86E-03    | 1.30E-13 | 5.29E-06 | 7.59E-10 |
| phe.Fasting_ | rs77444916 | S23 | LOC642366 | rs185069296 | S15 | "LOC100505( | 5.84E-06 | 1        | 2.86E-03    | 1.30E-13 | 5.29E-06 | 7.59E-10 |
| phe.Fasting_ | rs77444916 | S23 | LOC642366 | rs185502834 | S8  | DIAPH1      | 1.45E-06 | 1        | 8.46E-04    | 3.46E-14 | 1.41E-06 | 2.51E-10 |
| phe.Fasting_ | rs77444916 | S23 | LOC642366 | rs185759881 | S7  | DIAPH1      | 5.84E-06 | 1        | 2.86E-03    | 1.30E-13 | 5.29E-06 | 7.59E-10 |
| phe.Fasting_ | rs77444916 | S23 | LOC642366 | rs186288044 | S21 | "PCDHGB4,PI | 9.01E-07 | 1        | 0.000551882 | 5.24E-14 | 2.13E-06 | 3.61E-10 |
| phe.Fasting_ | rs77444916 | S23 | LOC642366 | rs187000011 | S11 | DIAPH1      | 5.84E-06 | 1        | 2.86E-03    | 1.30E-13 | 5.29E-06 | 7.59E-10 |
| phe.Fasting_ | rs77444916 | S23 | LOC642366 | rs188981295 | S5  | "RPS27AP10, | 5.84E-06 | 1        | 2.86E-03    | 1.30E-13 | 5.29E-06 | 7.59E-10 |
| phe.Fasting_ | rs77444916 | S23 | LOC642366 | rs190559574 | S7  | DIAPH1      | 1.45E-06 | 1        | 8.46E-04    | 3.46E-14 | 1.41E-06 | 2.51E-10 |
| phe.Fasting_ | rs77444916 | S23 | LOC642366 | rs191544043 | S8  | DIAPH1      | 5.84E-06 | 1        | 2.86E-03    | 1.30E-13 | 5.29E-06 | 7.59E-10 |
| phe.Fasting_ | rs77444916 | S23 | LOC642366 | rs191766712 | S7  | DIAPH1      | 5.84E-06 | 1        | 0.0028563   | 1.30E-13 | 5.29E-06 | 7.59E-10 |
| phe.Fasting_ | rs77444916 | S23 | LOC642366 | rs192690040 | S7  | DIAPH1      | 5.84E-06 | 1        | 2.86E-03    | 1.30E-13 | 5.29E-06 | 7.59E-10 |
| phe.Fasting_ | rs77444916 | S23 | LOC642366 | rs192765219 | S7  | DIAPH1      | 5.84E-06 | 1        | 2.86E-03    | 1.30E-13 | 5.29E-06 | 7.59E-10 |
| phe.Fasting_ | rs77444916 | S23 | LOC642366 | rs192770525 | S7  | DIAPH1      | 5.84E-06 | 1        | 2.86E-03    | 1.30E-13 | 5.29E-06 | 7.59E-10 |
| phe.Fasting_ | rs77444916 | S23 | LOC642366 | rs2285645   | S7  | MTMR3       | 1.76E-07 | 1        | 1.27E-04    | 4.87E-14 | 1.98E-06 | 3.37E-10 |
| phe.Fasting_ | rs77444916 | S23 | LOC642366 | rs2924507   | S5  | ZC3H3       | 3.47E-18 | 1.42E-10 | 5.60E-14    | 2.19E-13 | 8.93E-06 | 1.21E-09 |
| phe.Fasting_ | rs77444916 | S23 | LOC642366 | rs2924508   | S8  | ZC3H3       | 3.47E-18 | 1.42E-10 | 5.60E-14    | 3.11E-13 | 1.27E-05 | 1.70E-09 |
| phe.Fasting_ | rs77444916 | S23 | LOC642366 | rs2924511   | S7  | ZC3H3       | 3.47E-18 | 1.42E-10 | 5.60E-14    | 1.97E-13 | 8.01E-06 | 1.10E-09 |
| phe.Fasting_ | rs77444916 | S23 | LOC642366 | rs2924512   | S7  | ZC3H3       | 3.97E-18 | 1.62E-10 | 5.99E-14    | 2.29E-13 | 9.30E-06 | 1.26E-09 |
| phe.Fasting_ | rs77444916 | S23 | LOC642366 | rs2956376   | S8  | ZC3H3       | 3.47E-18 | 1.42E-10 | 5.60E-14    | 1.33E-13 | 5.43E-06 | 7.77E-10 |
| phe.Fasting_ | rs77444916 | S23 | LOC642366 | rs2980270   | S7  | ZC3H3       | 3.47E-18 | 1.42E-10 | 5.60E-14    | 1.33E-13 | 5.43E-06 | 7.77E-10 |
| phe.Fasting_ | rs77444916 | S23 | LOC642366 | rs2980272   | S7  | ZC3H3       | 3.97E-18 | 1.62E-10 | 5.99E-14    | 2.52E-13 | 1.03E-05 | 1.39E-09 |
| phe.Fasting_ | rs77444916 | S23 | LOC642366 | rs2980275   | S5  | ZC3H3       | 3.47E-18 | 1.42E-10 | 5.60E-14    | 2.19E-13 | 8.93E-06 | 1.21E-09 |
| phe.Fasting_ | rs77444916 | S23 | LOC642366 | rs34801978  | S3  | HOXB2       | 1.05E-06 | 1        | 0.000634489 | 4.42E-09 | 0.179891 | 8.98E-06 |
| phe.Fasting_ | rs77444916 | S23 | LOC642366 | rs35990401  | S7  | DIAPH1      | 4.98E-06 | 1        | 0.00248101  | 5.10E-14 | 2.08E-06 | 3.52E-10 |
| phe.Fasting_ | rs77444916 | S23 | LOC642366 | rs366767    | S5  | ZC3H3       | 4.74E-18 | 1.93E-10 | 6.62E-14    | 1.49E-13 | 6.06E-06 | 8.45E-10 |
| phe.Fasting_ | rs77444916 | S23 | LOC642366 | rs4732511   | S13 | POR         | 1.38E-18 | 5.65E-11 | 3.39E-14    | 2.18E-06 | 1        | 2.23E-03 |
| phe.Fasting_ | rs77444916 | S23 | LOC642366 | rs55900860  | S7  | DIAPH1      | 1.45E-06 | 1.00E+00 | 8.46E-04    | 3.46E-14 | 1.41E-06 | 2.51E-10 |

|                        |     |           |             |     |             |          |             |             |          |             |            |
|------------------------|-----|-----------|-------------|-----|-------------|----------|-------------|-------------|----------|-------------|------------|
| phe.Fasting_rs77444916 | S23 | LOC642366 | rs57503635  | S3  | NA          | 8.73E-17 | 3.57E-09    | 3.79E-13    | 1.25E-14 | 5.07E-07    | 1.07E-10   |
| phe.Fasting_rs77444916 | S23 | LOC642366 | rs60011869  | S16 | NA          | 9.65E-07 | 1.00E+00    | 5.87E-04    | 5.08E-15 | 2.07E-07    | 4.68E-11   |
| phe.Fasting_rs77444916 | S23 | LOC642366 | rs6964407   | S7  | POR         | 4.32E-18 | 1.76E-10    | 6.34E-14    | 2.04E-06 | 1           | 0.00210857 |
| phe.Fasting_rs77444916 | S23 | LOC642366 | rs7004597   | S8  | NA          | 1.30E-11 | 0.000530003 | 2.02E-08    | 3.39E-15 | 1.38E-07    | 3.24E-11   |
| phe.Fasting_rs77444916 | S23 | LOC642366 | rs7256517   | S7  | CYTH2       | 1.01E-16 | 4.11E-09    | 4.28E-13    | 8.71E-15 | 3.55E-07    | 7.66E-11   |
| phe.Fasting_rs77444916 | S23 | LOC642366 | rs73283603  | S7  | ZWINT       | 9.84E-17 | 4.02E-09    | 4.21E-13    | 5.66E-15 | 2.30E-07    | 5.16E-11   |
| phe.Fasting_rs77444916 | S23 | LOC642366 | rs73392640  | S8  | POLR3B      | 1.50E-16 | 6.14E-09    | 5.83E-13    | 9.36E-12 | 0.000380943 | 3.49E-08   |
| phe.Fasting_rs77444916 | S23 | LOC642366 | rs73619637  | S8  | NA          | 9.04E-06 | 1           | 0.00418654  | 5.49E-16 | 2.24E-08    | 1.16E-11   |
| phe.Fasting_rs77444916 | S23 | LOC642366 | rs73794928  | S13 | "PCDHGA9,PI | 1.41E-06 | 1           | 0.000826258 | 2.53E-14 | 1.03E-06    | 1.92E-10   |
| phe.Fasting_rs77444916 | S23 | LOC642366 | rs74627895  | S8  | TMEM64      | 1.13E-17 | 4.62E-10    | 1.02E-13    | 3.94E-15 | 1.60E-07    | 3.70E-11   |
| phe.Fasting_rs77444916 | S23 | LOC642366 | rs74701059  | S24 | C17orf102   | 1.50E-17 | 6.14E-10    | 1.18E-13    | 3.22E-15 | 1.31E-07    | 3.09E-11   |
| phe.Fasting_rs77444916 | S23 | LOC642366 | rs74914207  | S24 | NA          | 3.46E-12 | 0.000141389 | 6.28E-09    | 1.58E-11 | 0.000644651 | 5.68E-08   |
| phe.Fasting_rs77444916 | S23 | LOC642366 | rs75350765  | S5  | RCL1        | 2.52E-17 | 1.03E-09    | 1.56E-13    | 5.48E-15 | 2.23E-07    | 5.01E-11   |
| phe.Fasting_rs77444916 | S23 | LOC642366 | rs75374128  | S5  | CNTLN       | 1.14E-17 | 4.66E-10    | 1.02E-13    | 8.56E-11 | 0.00348551  | 2.64E-07   |
| phe.Fasting_rs77444916 | S23 | LOC642366 | rs75758702  | S24 | NA          | 5.36E-18 | 7.19E-10    | 7.01E-14    | 1.92E-16 | 7.80E-09    | 7.61E-12   |
| phe.Fasting_rs77444916 | S23 | LOC642366 | rs75864203  | S8  | CNTLN       | 1.14E-17 | 4.66E-10    | 1.02E-13    | 8.56E-11 | 0.00348551  | 2.64E-07   |
| phe.Fasting_rs77444916 | S23 | LOC642366 | rs75949566  | S5  | TMEM64      | 3.79E-17 | 1.55E-09    | 2.05E-13    | 9.41E-15 | 3.83E-07    | 8.18E-11   |
| phe.Fasting_rs77444916 | S23 | LOC642366 | rs76844308  | S8  | CNTLN       | 7.43E-07 | 1           | 4.66E-04    | 2.85E-15 | 1.16E-07    | 2.76E-11   |
| phe.Fasting_rs77444916 | S23 | LOC642366 | rs7763107   | S8  | FARS2       | 6.68E-17 | 2.73E-09    | 3.05E-13    | 1.29E-15 | 5.24E-08    | 1.46E-11   |
| phe.Fasting_rs77444916 | S23 | LOC642366 | rs77798597  | S7  | KPNA3       | 2.72E-16 | 1.11E-08    | 9.14E-13    | 2.88E-14 | 1.17E-06    | 2.16E-10   |
| phe.Fasting_rs77444916 | S23 | LOC642366 | rs77845645  | S21 | NA          | 1.59E-17 | 6.50E-10    | 1.22E-13    | 1.19E-14 | 4.85E-07    | 1.02E-10   |
| phe.Fasting_rs77444916 | S23 | LOC642366 | rs78353402  | S8  | AP3M2       | 1.30E-11 | 0.000530003 | 2.02E-08    | 4.93E-15 | 2.01E-07    | 4.56E-11   |
| phe.Fasting_rs77444916 | S23 | LOC642366 | rs78516788  | S8  | SLC38A1     | 1.33E-17 | 5.43E-10    | 1.10E-13    | 1.01E-14 | 4.10E-07    | 8.74E-11   |
| phe.Fasting_rs77444916 | S23 | LOC642366 | rs78697063  | S5  | MSI2        | 5.49E-20 | 2.24E-12    | 2.23E-14    | 3.16E-15 | 1.28E-07    | 3.03E-11   |
| phe.Fasting_rs77444916 | S23 | LOC642366 | rs78722272  | S5  | CNTLN       | 1.14E-17 | 4.66E-10    | 1.02E-13    | 8.46E-11 | 0.00344297  | 2.62E-07   |
| phe.Fasting_rs77444916 | S23 | LOC642366 | rs78736524  | S5  | KPNA3       | 2.72E-16 | 1.11E-08    | 9.14E-13    | 3.09E-14 | 1.26E-06    | 2.29E-10   |
| phe.Fasting_rs77444916 | S23 | LOC642366 | rs78990344  | S2  | LOC1005063! | 3.76E-17 | 1.53E-09    | 2.04E-13    | 6.48E-15 | 2.64E-07    | 5.85E-11   |
| phe.Fasting_rs77444916 | S23 | LOC642366 | rs79517926  | S15 | "DIAPH1,LOC | 1.35E-06 | 1.00E+00    | 7.94E-04    | 5.85E-15 | 2.38E-07    | 5.33E-11   |
| phe.Fasting_rs77444916 | S23 | LOC642366 | rs79703349  | S24 | C17orf102   | 1.50E-17 | 6.14E-10    | 1.18E-13    | 3.66E-15 | 1.49E-07    | 3.48E-11   |
| phe.Fasting_rs77444916 | S23 | LOC642366 | rs79781495  | S8  | KPNA3       | 2.72E-16 | 1.11E-08    | 9.14E-13    | 2.88E-14 | 1.17E-06    | 2.16E-10   |
| phe.Fasting_rs77444916 | S23 | LOC642366 | rs79886603  | S15 | NA          | 3.52E-07 | 1.00E+00    | 2.40E-04    | 3.62E-15 | 1.47E-07    | 3.45E-11   |
| phe.Fasting_rs77444916 | S23 | LOC642366 | rs80332465  | S5  | KPNA3       | 2.95E-16 | 1.21E-08    | 9.83E-13    | 3.02E-14 | 1.23E-06    | 2.25E-10   |
| phe.Fasting_rs77444916 | S23 | LOC642366 | rs80334773  | S5  | KPNA3       | 2.95E-16 | 1.21E-08    | 9.83E-13    | 3.02E-14 | 1.23E-06    | 2.25E-10   |
| phe.Fasting_rs77444916 | S23 | LOC642366 | rs8075478   | S8  | MYH10       | 4.86E-07 | 1           | 3.20E-04    | 1.26E-15 | 5.14E-08    | 1.43E-11   |
| phe.Fasting_rs77444916 | S23 | LOC642366 | rs9620939   | S7  | MTMR3       | 1.86E-07 | 1           | 1.33E-04    | 9.79E-17 | 3.98E-09    | 5.51E-12   |
| phe.Fasting_rs77444916 | S23 | LOC642366 | rs9625903   | S7  | MTMR3       | 2.09E-07 | 1           | 0.000148281 | 3.64E-17 | 1.48E-09    | 3.17E-12   |
| phe.Fasting_rs77523818 | S7  | SPTLC1    | rs114968018 | S21 | NA          | 7.91E-14 | 3.23E-06    | 1.82E-10    | 1.22E-06 | 1           | 0.00135245 |
| phe.Fasting_rs77523818 | S7  | SPTLC1    | rs115305957 | S23 | NA          | 2.18E-06 | 1.00E+00    | 1.21E-03    | 1.25E-11 | 0.000508253 | 4.57E-08   |
| phe.Fasting_rs77523818 | S7  | SPTLC1    | rs115787552 | S5  | KPNA3       | 8.45E-06 | 1           | 3.95E-03    | 1.44E-15 | 5.86E-08    | 1.61E-11   |
| phe.Fasting_rs77523818 | S7  | SPTLC1    | rs116079984 | S8  | KPNA3       | 8.45E-06 | 1           | 0.00394669  | 1.78E-15 | 7.24E-08    | 1.94E-11   |

|                        |    |        |             |     |           |          |          |             |          |             |             |
|------------------------|----|--------|-------------|-----|-----------|----------|----------|-------------|----------|-------------|-------------|
| phe.Fasting_rs77523818 | S7 | SPTLC1 | rs12581352  | S2  | NA        | 7.63E-18 | 3.12E-10 | 8.49E-14    | 2.07E-13 | 8.42E-06    | 1.15E-09    |
| phe.Fasting_rs77523818 | S7 | SPTLC1 | rs140524622 | S7  | MRPL10    | 4.51E-07 | 1        | 0.000298232 | 9.18E-09 | 0.37374     | 1.73E-05    |
| phe.Fasting_rs77523818 | S7 | SPTLC1 | rs146815317 | S5  | KPNA3     | 8.45E-06 | 1        | 3.95E-03    | 1.44E-15 | 5.86E-08    | 1.61E-11    |
| phe.Fasting_rs77523818 | S7 | SPTLC1 | rs150117838 | S8  | KPNA3     | 8.45E-06 | 1        | 3.95E-03    | 1.39E-15 | 5.68E-08    | 1.57E-11    |
| phe.Fasting_rs77523818 | S7 | SPTLC1 | rs4820499   | S10 | PACSIN2   | 3.11E-09 | 0.127003 | 3.16E-06    | 1.69E-09 | 0.0688813   | 3.80E-06    |
| phe.Fasting_rs77523818 | S7 | SPTLC1 | rs57503635  | S3  | NA        | 1.02E-06 | 1        | 6.15E-04    | 3.81E-15 | 1.55E-07    | 3.60E-11    |
| phe.Fasting_rs77523818 | S7 | SPTLC1 | rs7256517   | S7  | CYTH2     | 1.97E-13 | 8.05E-06 | 4.34E-10    | 8.09E-08 | 1           | 0.000117069 |
| phe.Fasting_rs77523818 | S7 | SPTLC1 | rs73392640  | S8  | POLR3B    | 3.49E-07 | 1        | 2.38E-04    | 2.52E-09 | 0.102571    | 5.42E-06    |
| phe.Fasting_rs77523818 | S7 | SPTLC1 | rs73619637  | S8  | NA        | 6.45E-17 | 2.63E-09 | 2.97E-13    | 1.16E-08 | 0.47072     | 2.11E-05    |
| phe.Fasting_rs77523818 | S7 | SPTLC1 | rs74701059  | S24 | C17orf102 | 2.09E-06 | 1        | 1.17E-03    | 1.43E-11 | 0.000580785 | 5.16E-08    |
| phe.Fasting_rs77523818 | S7 | SPTLC1 | rs74914207  | S24 | NA        | 3.96E-06 | 1        | 2.03E-03    | 5.67E-09 | 0.230611    | 1.11E-05    |
| phe.Fasting_rs77523818 | S7 | SPTLC1 | rs7511534   | S12 | PACSIN2   | 2.43E-09 | 9.94E-02 | 2.51E-06    | 2.13E-09 | 0.0866869   | 4.68E-06    |
| phe.Fasting_rs77523818 | S7 | SPTLC1 | rs77798597  | S7  | KPNA3     | 8.45E-06 | 1.00E+00 | 3.95E-03    | 1.39E-15 | 5.68E-08    | 1.57E-11    |
| phe.Fasting_rs77523818 | S7 | SPTLC1 | rs78736524  | S5  | KPNA3     | 8.45E-06 | 1.00E+00 | 3.95E-03    | 1.44E-15 | 5.86E-08    | 1.61E-11    |
| phe.Fasting_rs77523818 | S7 | SPTLC1 | rs79703349  | S24 | C17orf102 | 2.09E-06 | 1.00E+00 | 1.17E-03    | 1.80E-11 | 0.000733527 | 6.43E-08    |
| phe.Fasting_rs77523818 | S7 | SPTLC1 | rs79781495  | S8  | KPNA3     | 8.45E-06 | 1.00E+00 | 3.95E-03    | 1.39E-15 | 5.68E-08    | 1.57E-11    |
| phe.Fasting_rs77523818 | S7 | SPTLC1 | rs80332465  | S5  | KPNA3     | 1.20E-05 | 1.00E+00 | 5.36E-03    | 1.50E-15 | 6.12E-08    | 1.67E-11    |
| phe.Fasting_rs77523818 | S7 | SPTLC1 | rs80334773  | S5  | KPNA3     | 1.20E-05 | 1        | 5.36E-03    | 1.50E-15 | 6.12E-08    | 1.67E-11    |
| phe.Fasting_rs7763107  | S8 | FARS2  | rs112089881 | S8  | ZFAND4    | 5.95E-08 | 1        | 4.79E-05    | 3.16E-10 | 0.0128564   | 8.49E-07    |
| phe.Fasting_rs7763107  | S8 | FARS2  | rs115787552 | S5  | KPNA3     | 3.58E-14 | 1.46E-06 | 8.65E-11    | 1.73E-07 | 1           | 0.000233381 |
| phe.Fasting_rs7763107  | S8 | FARS2  | rs115888477 | S8  | NA        | 1.57E-12 | 6.41E-05 | 3.05E-09    | 3.04E-08 | 1           | 4.93E-05    |
| phe.Fasting_rs7763107  | S8 | FARS2  | rs116011837 | S9  | BRD2      | 1.98E-06 | 1.00E+00 | 1.11E-03    | 1.02E-06 | 1           | 0.00115583  |
| phe.Fasting_rs7763107  | S8 | FARS2  | rs116079984 | S8  | KPNA3     | 3.58E-14 | 1.46E-06 | 8.65E-11    | 2.02E-07 | 1           | 0.00026756  |
| phe.Fasting_rs7763107  | S8 | FARS2  | rs116120727 | S9  | BRD2      | 1.98E-06 | 1.00E+00 | 1.11E-03    | 1.02E-06 | 1           | 1.16E-03    |
| phe.Fasting_rs7763107  | S8 | FARS2  | rs146815317 | S5  | KPNA3     | 3.58E-14 | 1.46E-06 | 8.65E-11    | 1.73E-07 | 1           | 0.000233381 |
| phe.Fasting_rs7763107  | S8 | FARS2  | rs150117838 | S8  | KPNA3     | 3.58E-14 | 1.46E-06 | 8.65E-11    | 1.60E-07 | 1           | 0.000216451 |
| phe.Fasting_rs7763107  | S8 | FARS2  | rs57503635  | S3  | NA        | 2.46E-16 | 1.00E-08 | 8.33E-13    | 3.53E-07 | 1           | 0.000438606 |
| phe.Fasting_rs7763107  | S8 | FARS2  | rs60011869  | S16 | NA        | 8.91E-06 | 1        | 0.00413754  | 5.08E-08 | 1           | 7.78E-05    |
| phe.Fasting_rs7763107  | S8 | FARS2  | rs77798597  | S7  | KPNA3     | 3.58E-14 | 1.46E-06 | 8.65E-11    | 1.60E-07 | 1           | 0.000216451 |
| phe.Fasting_rs7763107  | S8 | FARS2  | rs77845645  | S21 | NA        | 6.51E-17 | 2.66E-09 | 2.99E-13    | 1.10E-09 | 0.0446403   | 2.59E-06    |
| phe.Fasting_rs7763107  | S8 | FARS2  | rs78516788  | S8  | SLC38A1   | 6.43E-17 | 2.63E-09 | 2.96E-13    | 7.99E-06 | 1           | 6.77E-03    |
| phe.Fasting_rs7763107  | S8 | FARS2  | rs78736524  | S5  | KPNA3     | 3.58E-14 | 1.46E-06 | 8.65E-11    | 1.73E-07 | 1           | 2.33E-04    |
| phe.Fasting_rs7763107  | S8 | FARS2  | rs79781495  | S8  | KPNA3     | 3.58E-14 | 1.46E-06 | 8.65E-11    | 1.60E-07 | 1           | 0.000216451 |
| phe.Fasting_rs7763107  | S8 | FARS2  | rs80332465  | S5  | KPNA3     | 3.80E-14 | 1.55E-06 | 9.16E-11    | 1.77E-07 | 1           | 0.000238265 |
| phe.Fasting_rs7763107  | S8 | FARS2  | rs80334773  | S5  | KPNA3     | 3.80E-14 | 1.55E-06 | 9.16E-11    | 1.77E-07 | 1           | 0.000238265 |
| phe.Fasting_rs7763107  | S8 | FARS2  | rs8075478   | S8  | MYH10     | 7.85E-17 | 3.20E-09 | 3.48E-13    | 1.53E-06 | 1           | 0.00164028  |
| phe.Fasting_rs77798597 | S7 | KPNA3  | rs140524622 | S7  | MRPL10    | 3.78E-08 | 1        | 3.18E-05    | 1.50E-16 | 6.10E-09    | 6.88E-12    |
| phe.Fasting_rs77798597 | S7 | KPNA3  | rs57503635  | S3  | NA        | 1.29E-15 | 5.25E-08 | 3.74E-12    | 4.13E-15 | 1.68E-07    | 3.85E-11    |
| phe.Fasting_rs77798597 | S7 | KPNA3  | rs7256517   | S7  | CYTH2     | 1.78E-05 | 1        | 0.00753655  | 1.34E-06 | 1           | 0.00147054  |
| phe.Fasting_rs77798597 | S7 | KPNA3  | rs75506779  | S5  | TMCO3     | 2.52E-06 | 1        | 0.00136748  | 2.40E-15 | 9.76E-08    | 2.35E-11    |



|                        |     |    |             |     |           |          |             |             |          |             |             |
|------------------------|-----|----|-------------|-----|-----------|----------|-------------|-------------|----------|-------------|-------------|
| phe.Fasting_rs77845645 | S21 | NA | rs111576333 | S5  | TMEM64    | 3.54E-07 | 1           | 0.000241699 | 2.51E-10 | 0.0102075   | 6.91E-07    |
| phe.Fasting_rs77845645 | S21 | NA | rs112091318 | S5  | TMEM64    | 1.07E-07 | 1           | 8.09E-05    | 5.63E-20 | 2.29E-12    | 9.17E-14    |
| phe.Fasting_rs77845645 | S21 | NA | rs112348319 | S8  | SPTLC1    | 9.64E-18 | 3.94E-10    | 9.45E-14    | 2.28E-07 | 1           | 2.97E-04    |
| phe.Fasting_rs77845645 | S21 | NA | rs112608164 | S8  | SPTLC1    | 9.64E-18 | 3.94E-10    | 9.45E-14    | 2.28E-07 | 1           | 0.00029712  |
| phe.Fasting_rs77845645 | S21 | NA | rs113568654 | S12 | SPTLC1    | 8.06E-18 | 3.29E-10    | 8.62E-14    | 1.56E-06 | 1           | 0.00166374  |
| phe.Fasting_rs77845645 | S21 | NA | rs114334325 | S7  | AP3M2     | 2.01E-12 | 8.21E-05    | 3.80E-09    | 8.48E-14 | 3.45E-06    | 5.67E-10    |
| phe.Fasting_rs77845645 | S21 | NA | rs114394395 | S7  | AP3M2     | 2.12E-12 | 8.66E-05    | 3.98E-09    | 8.48E-14 | 3.45E-06    | 5.67E-10    |
| phe.Fasting_rs77845645 | S21 | NA | rs114565620 | S8  | RCL1      | 8.97E-18 | 3.66E-10    | 9.19E-14    | 9.34E-16 | 3.80E-08    | 1.16E-11    |
| phe.Fasting_rs77845645 | S21 | NA | rs115083290 | S19 | NA        | 5.37E-17 | 2.19E-09    | 2.62E-13    | 2.45E-07 | 1           | 0.000316101 |
| phe.Fasting_rs77845645 | S21 | NA | rs115305957 | S23 | NA        | 1.41E-17 | 5.77E-10    | 1.14E-13    | 2.80E-09 | 0.113911    | 5.96E-06    |
| phe.Fasting_rs77845645 | S21 | NA | rs115554530 | S8  | ASNS      | 9.50E-17 | 3.88E-09    | 4.08E-13    | 5.13E-09 | 0.209016    | 1.01E-05    |
| phe.Fasting_rs77845645 | S21 | NA | rs115752779 | S19 | NA        | 5.37E-17 | 2.19E-09    | 2.62E-13    | 2.45E-07 | 1           | 0.000316101 |
| phe.Fasting_rs77845645 | S21 | NA | rs115787552 | S5  | KPNA3     | 3.10E-16 | 1.26E-08    | 1.03E-12    | 3.94E-06 | 1           | 0.00371478  |
| phe.Fasting_rs77845645 | S21 | NA | rs116079984 | S8  | KPNA3     | 3.10E-16 | 1.26E-08    | 1.03E-12    | 4.95E-06 | 1           | 0.00453036  |
| phe.Fasting_rs77845645 | S21 | NA | rs116406581 | S2  | NA        | 7.82E-12 | 0.000319355 | 1.31E-08    | 4.52E-14 | 1.84E-06    | 3.14E-10    |
| phe.Fasting_rs77845645 | S21 | NA | rs116696844 | S3  | AP3M2     | 2.71E-12 | 0.00011073  | 5.01E-09    | 8.48E-14 | 3.45E-06    | 5.67E-10    |
| phe.Fasting_rs77845645 | S21 | NA | rs11989304  | S4  | TMEM64    | 3.54E-07 | 1           | 0.000241699 | 2.47E-10 | 0.0100727   | 6.82E-07    |
| phe.Fasting_rs77845645 | S21 | NA | rs140524622 | S7  | MRPL10    | 5.11E-08 | 1.00E+00    | 4.17E-05    | 1.87E-06 | 1           | 0.00195086  |
| phe.Fasting_rs77845645 | S21 | NA | rs141926074 | S8  | ATE1      | 5.46E-18 | 2.23E-10    | 7.07E-14    | 2.36E-11 | 0.000959051 | 8.19E-08    |
| phe.Fasting_rs77845645 | S21 | NA | rs146815317 | S5  | KPNA3     | 3.10E-16 | 1.26E-08    | 1.03E-12    | 3.94E-06 | 1           | 0.00371478  |
| phe.Fasting_rs77845645 | S21 | NA | rs150117838 | S8  | KPNA3     | 3.10E-16 | 1.26E-08    | 1.03E-12    | 3.90E-06 | 1           | 0.00368301  |
| phe.Fasting_rs77845645 | S21 | NA | rs34801978  | S3  | HOXB2     | 1.25E-07 | 1           | 9.34E-05    | 5.11E-10 | 0.0208133   | 1.33E-06    |
| phe.Fasting_rs77845645 | S21 | NA | rs59310399  | S8  | FLI1      | 2.56E-08 | 1           | 2.23E-05    | 1.38E-09 | 0.056147    | 3.15E-06    |
| phe.Fasting_rs77845645 | S21 | NA | rs7004597   | S8  | NA        | 2.01E-12 | 8.21E-05    | 3.80E-09    | 4.28E-14 | 1.74E-06    | 2.98E-10    |
| phe.Fasting_rs77845645 | S21 | NA | rs7141392   | S7  | COQ6      | 3.59E-06 | 1           | 1.85E-03    | 9.56E-06 | 1           | 0.00787225  |
| phe.Fasting_rs77845645 | S21 | NA | rs7256517   | S7  | CYTH2     | 3.74E-07 | 1           | 2.54E-04    | 6.72E-07 | 1           | 0.000786558 |
| phe.Fasting_rs77845645 | S21 | NA | rs73283603  | S7  | ZWINT     | 1.27E-16 | 5.17E-09    | 5.14E-13    | 9.62E-08 | 1           | 0.000136294 |
| phe.Fasting_rs77845645 | S21 | NA | rs73392640  | S8  | POLR3B    | 1.43E-16 | 5.85E-09    | 5.66E-13    | 3.33E-12 | 0.000135717 | 1.41E-08    |
| phe.Fasting_rs77845645 | S21 | NA | rs73619637  | S8  | NA        | 2.17E-10 | 0.00886193  | 2.67E-07    | 6.28E-17 | 2.56E-09    | 4.32E-12    |
| phe.Fasting_rs77845645 | S21 | NA | rs74627895  | S8  | TMEM64    | 1.07E-07 | 1           | 8.09E-05    | 1.97E-20 | 8.03E-13    | 3.65E-14    |
| phe.Fasting_rs77845645 | S21 | NA | rs74701059  | S24 | C17orf102 | 1.39E-17 | 5.69E-10    | 1.13E-13    | 3.45E-09 | 0.140473    | 7.20E-06    |
| phe.Fasting_rs77845645 | S21 | NA | rs74847685  | S8  | FLI1      | 1.20E-08 | 4.90E-01    | 1.10E-05    | 4.69E-09 | 0.190872    | 9.38E-06    |
| phe.Fasting_rs77845645 | S21 | NA | rs74914207  | S24 | NA        | 1.55E-17 | 6.34E-10    | 1.20E-13    | 4.08E-11 | 0.00165898  | 1.34E-07    |
| phe.Fasting_rs77845645 | S21 | NA | rs75350765  | S5  | RCL1      | 8.97E-18 | 3.66E-10    | 9.19E-14    | 9.34E-16 | 3.80E-08    | 1.16E-11    |
| phe.Fasting_rs77845645 | S21 | NA | rs75949566  | S5  | TMEM64    | 3.94E-07 | 1.00E+00    | 2.65E-04    | 3.29E-10 | 0.0133898   | 8.79E-07    |
| phe.Fasting_rs77845645 | S21 | NA | rs76542405  | S5  | SPTLC1    | 9.64E-18 | 3.94E-10    | 9.45E-14    | 2.28E-07 | 1           | 0.00029712  |
| phe.Fasting_rs77845645 | S21 | NA | rs77523818  | S7  | SPTLC1    | 9.64E-18 | 3.94E-10    | 9.45E-14    | 2.28E-07 | 1           | 0.00029712  |
| phe.Fasting_rs77845645 | S21 | NA | rs77798597  | S7  | KPNA3     | 3.10E-16 | 1.26E-08    | 1.03E-12    | 3.90E-06 | 1           | 0.00368301  |
| phe.Fasting_rs77845645 | S21 | NA | rs78353402  | S8  | AP3M2     | 2.01E-12 | 8.21E-05    | 3.80E-09    | 8.48E-14 | 3.45E-06    | 5.67E-10    |
| phe.Fasting_rs77845645 | S21 | NA | rs78736524  | S5  | KPNA3     | 3.10E-16 | 1.26E-08    | 1.03E-12    | 3.94E-06 | 1           | 0.00371478  |

|                        |     |         |             |     |             |          |          |          |          |           |             |
|------------------------|-----|---------|-------------|-----|-------------|----------|----------|----------|----------|-----------|-------------|
| phe.Fasting_rs77845645 | S21 | NA      | rs78990344  | S2  | LOC1005063  | 3.54E-07 | 1        | 2.42E-04 | 2.47E-10 | 0.0100727 | 6.82E-07    |
| phe.Fasting_rs77845645 | S21 | NA      | rs79703349  | S24 | C17orf102   | 1.39E-17 | 5.69E-10 | 1.13E-13 | 4.62E-09 | 0.188135  | 9.26E-06    |
| phe.Fasting_rs77845645 | S21 | NA      | rs79781495  | S8  | KPNA3       | 3.10E-16 | 1.26E-08 | 1.03E-12 | 3.90E-06 | 1         | 0.00368301  |
| phe.Fasting_rs77845645 | S21 | NA      | rs80332465  | S5  | KPNA3       | 3.34E-16 | 1.36E-08 | 1.11E-12 | 4.03E-06 | 1         | 0.00379162  |
| phe.Fasting_rs77845645 | S21 | NA      | rs80334773  | S5  | KPNA3       | 3.34E-16 | 1.36E-08 | 1.11E-12 | 4.03E-06 | 1         | 0.00379162  |
| phe.Fasting_rs77845645 | S21 | NA      | rs8075478   | S8  | MYH10       | 3.61E-08 | 1.00E+00 | 3.05E-05 | 3.15E-07 | 1         | 0.000395576 |
| phe.Fasting_rs7825326  | S7  | UBE2W   | rs139070959 | S8  | RPN2        | 1.18E-06 | 1.00E+00 | 7.01E-04 | 2.28E-07 | 1         | 0.0002973   |
| phe.Fasting_rs7825326  | S7  | UBE2W   | rs145412529 | S8  | "RBL1,RPS3A | 6.02E-07 | 1.00E+00 | 3.88E-04 | 1.61E-06 | 1         | 0.00171532  |
| phe.Fasting_rs7831254  | S8  | UBE2W   | rs139070959 | S8  | RPN2        | 1.05E-06 | 1.00E+00 | 6.31E-04 | 1.95E-07 | 1         | 0.000258319 |
| phe.Fasting_rs7831254  | S8  | UBE2W   | rs145412529 | S8  | "RBL1,RPS3A | 5.32E-07 | 1.00E+00 | 3.47E-04 | 1.37E-06 | 1         | 0.00149555  |
| phe.Fasting_rs78353402 | S8  | AP3M2   | rs111576333 | S5  | TMEM64      | 1.38E-15 | 5.65E-08 | 3.99E-12 | 6.72E-08 | 1         | 0.000100215 |
| phe.Fasting_rs78353402 | S8  | AP3M2   | rs112091318 | S5  | TMEM64      | 3.67E-16 | 1.50E-08 | 1.20E-12 | 3.09E-08 | 1         | 4.98E-05    |
| phe.Fasting_rs78353402 | S8  | AP3M2   | rs11989304  | S4  | TMEM64      | 1.38E-15 | 5.65E-08 | 3.99E-12 | 1.33E-06 | 1         | 0.00145692  |
| phe.Fasting_rs78353402 | S8  | AP3M2   | rs141926074 | S8  | ATE1        | 5.12E-17 | 2.09E-09 | 2.51E-13 | 3.83E-08 | 1         | 6.03E-05    |
| phe.Fasting_rs78353402 | S8  | AP3M2   | rs1470889   | S5  | ZC3H3       | 4.41E-09 | 1.80E-01 | 4.45E-06 | 4.45E-07 | 1         | 0.000537526 |
| phe.Fasting_rs78353402 | S8  | AP3M2   | rs1470890   | S5  | ZC3H3       | 4.41E-09 | 1.80E-01 | 4.35E-06 | 4.45E-07 | 1         | 0.000537526 |
| phe.Fasting_rs78353402 | S8  | AP3M2   | rs2924507   | S5  | ZC3H3       | 4.41E-09 | 1.80E-01 | 4.35E-06 | 4.45E-07 | 1         | 0.000537526 |
| phe.Fasting_rs78353402 | S8  | AP3M2   | rs2924508   | S8  | ZC3H3       | 4.41E-09 | 1.80E-01 | 4.35E-06 | 1.22E-08 | 0.495784  | 2.22E-05    |
| phe.Fasting_rs78353402 | S8  | AP3M2   | rs2924511   | S7  | ZC3H3       | 4.41E-09 | 1.80E-01 | 4.35E-06 | 3.96E-07 | 1         | 0.000484099 |
| phe.Fasting_rs78353402 | S8  | AP3M2   | rs2924512   | S7  | ZC3H3       | 4.92E-09 | 0.201    | 4.82E-06 | 5.18E-07 | 1         | 0.000616896 |
| phe.Fasting_rs78353402 | S8  | AP3M2   | rs2956376   | S8  | ZC3H3       | 4.41E-09 | 1.80E-01 | 4.35E-06 | 2.73E-07 | 1         | 0.000348801 |
| phe.Fasting_rs78353402 | S8  | AP3M2   | rs2980270   | S7  | ZC3H3       | 4.41E-09 | 1.80E-01 | 4.35E-06 | 2.73E-07 | 1         | 0.000348801 |
| phe.Fasting_rs78353402 | S8  | AP3M2   | rs2980272   | S7  | ZC3H3       | 4.92E-09 | 2.01E-01 | 4.82E-06 | 5.49E-07 | 1         | 0.000652099 |
| phe.Fasting_rs78353402 | S8  | AP3M2   | rs2980275   | S5  | ZC3H3       | 4.41E-09 | 1.80E-01 | 4.35E-06 | 4.45E-07 | 1         | 0.000537526 |
| phe.Fasting_rs78353402 | S8  | AP3M2   | rs366767    | S5  | ZC3H3       | 8.73E-09 | 3.56E-01 | 8.25E-06 | 3.06E-07 | 1         | 0.000385546 |
| phe.Fasting_rs78353402 | S8  | AP3M2   | rs73283603  | S7  | ZWINT       | 9.00E-13 | 3.68E-05 | 1.86E-09 | 2.55E-06 | 1         | 0.00253862  |
| phe.Fasting_rs78353402 | S8  | AP3M2   | rs73392640  | S8  | POLR3B      | 9.66E-15 | 3.94E-07 | 2.46E-11 | 5.32E-08 | 1         | 8.11E-05    |
| phe.Fasting_rs78353402 | S8  | AP3M2   | rs73619637  | S8  | NA          | 3.31E-14 | 1.35E-06 | 8.02E-11 | 5.78E-11 | 0.0023523 | 1.85E-07    |
| phe.Fasting_rs78353402 | S8  | AP3M2   | rs74627895  | S8  | TMEM64      | 3.67E-16 | 1.50E-08 | 1.20E-12 | 2.74E-07 | 1         | 0.000350097 |
| phe.Fasting_rs78353402 | S8  | AP3M2   | rs75949566  | S5  | TMEM64      | 1.70E-15 | 6.95E-08 | 4.87E-12 | 1.63E-06 | 1         | 0.00172348  |
| phe.Fasting_rs78353402 | S8  | AP3M2   | rs78990344  | S2  | LOC1005063  | 1.38E-15 | 5.65E-08 | 3.99E-12 | 1.33E-06 | 1         | 0.00145692  |
| phe.Fasting_rs78353402 | S8  | AP3M2   | rs8075478   | S8  | MYH10       | 3.01E-10 | 1.23E-02 | 3.60E-07 | 1.26E-06 | 1         | 0.00138145  |
| phe.Fasting_rs7835483  | S5  | UBE2W   | rs139070959 | S8  | RPN2        | 1.22E-06 | 1        | 7.25E-04 | 2.19E-07 | 1         | 0.000286822 |
| phe.Fasting_rs7835483  | S5  | UBE2W   | rs145412529 | S8  | "RBL1,RPS3A | 6.24E-07 | 1.00E+00 | 4.00E-04 | 1.54E-06 | 1         | 0.00164627  |
| phe.Fasting_rs7845181  | S21 | NA      | rs139070959 | S8  | RPN2        | 1.89E-18 | 7.73E-11 | 3.97E-14 | 1.39E-08 | 0.56709   | 2.50E-05    |
| phe.Fasting_rs7845181  | S21 | NA      | rs145412529 | S8  | "RBL1,RPS3A | 1.07E-18 | 4.37E-11 | 3.03E-14 | 1.68E-08 | 0.68546   | 2.94E-05    |
| phe.Fasting_rs7845546  | S5  | UBE2W   | rs139070959 | S8  | RPN2        | 1.18E-06 | 1        | 7.01E-04 | 2.19E-07 | 1         | 0.000286822 |
| phe.Fasting_rs7845546  | S5  | UBE2W   | rs145412529 | S8  | "RBL1,RPS3A | 6.02E-07 | 1.00E+00 | 3.88E-04 | 1.54E-06 | 1         | 0.00164627  |
| phe.Fasting_rs78516788 | S8  | SLC38A1 | rs115305957 | S23 | NA          | 1.10E-06 | 1.00E+00 | 6.60E-04 | 7.17E-07 | 1         | 0.00083355  |
| phe.Fasting_rs78516788 | S8  | SLC38A1 | rs140524622 | S7  | MRPL10      | 1.58E-06 | 1.00E+00 | 9.10E-04 | 6.32E-16 | 2.57E-08  | 1.16E-11    |

|                        |    |            |             |     |             |          |             |             |          |             |             |
|------------------------|----|------------|-------------|-----|-------------|----------|-------------|-------------|----------|-------------|-------------|
| phe.Fasting_rs78516788 | S8 | SLC38A1    | rs73619637  | S8  | NA          | 3.64E-17 | 1.49E-09    | 1.98E-13    | 2.65E-06 | 1           | 0.00262851  |
| phe.Fasting_rs78516788 | S8 | SLC38A1    | rs74701059  | S24 | C17orf102   | 1.11E-06 | 1.00E+00    | 6.63E-04    | 7.51E-07 | 1           | 0.000869088 |
| phe.Fasting_rs78516788 | S8 | SLC38A1    | rs79703349  | S24 | C17orf102   | 1.11E-06 | 1.00E+00    | 6.63E-04    | 8.68E-07 | 1           | 0.000991467 |
| phe.Fasting_rs78516788 | S8 | SLC38A1    | rs8075478   | S8  | MYH10       | 1.24E-17 | 5.05E-10    | 1.06E-13    | 6.83E-06 | 1           | 0.00594363  |
| phe.Fasting_rs78697063 | S5 | MSI2       | rs57503635  | S3  | NA          | 2.25E-19 | 9.20E-12    | 2.40E-14    | 6.98E-07 | 1           | 0.00081333  |
| phe.Fasting_rs78697063 | S5 | MSI2       | rs73619637  | S8  | NA          | 2.04E-19 | 8.34E-12    | 2.40E-14    | 4.97E-06 | 1           | 0.0045487   |
| phe.Fasting_rs78703708 | S7 | FAF2       | rs114334325 | S7  | AP3M2       | 8.36E-12 | 3.42E-04    | 1.39E-08    | 1.76E-08 | 0.717274    | 3.07E-05    |
| phe.Fasting_rs78703708 | S7 | FAF2       | rs114394395 | S7  | AP3M2       | 8.86E-12 | 3.62E-04    | 1.47E-08    | 1.76E-08 | 0.717274    | 3.07E-05    |
| phe.Fasting_rs78703708 | S7 | FAF2       | rs115888477 | S8  | NA          | 1.90E-08 | 7.74E-01    | 1.68E-05    | 5.90E-11 | 0.00240238  | 1.88E-07    |
| phe.Fasting_rs78703708 | S7 | FAF2       | rs116011837 | S9  | BRD2        | 9.79E-07 | 1.00E+00    | 5.95E-04    | 3.35E-12 | 0.000136521 | 1.41E-08    |
| phe.Fasting_rs78703708 | S7 | FAF2       | rs116120727 | S9  | BRD2        | 9.79E-07 | 1.00E+00    | 5.95E-04    | 3.35E-12 | 0.000136521 | 1.41E-08    |
| phe.Fasting_rs78703708 | S7 | FAF2       | rs116406581 | S2  | NA          | 3.62E-11 | 1.48E-03    | 5.04E-08    | 7.99E-06 | 1           | 0.00677487  |
| phe.Fasting_rs78703708 | S7 | FAF2       | rs116696844 | S3  | AP3M2       | 1.19E-11 | 4.85E-04    | 1.86E-08    | 1.76E-08 | 0.717274    | 3.07E-05    |
| phe.Fasting_rs78703708 | S7 | FAF2       | rs141926074 | S8  | ATE1        | 1.91E-08 | 7.81E-01    | 1.69E-05    | 2.28E-06 | 1           | 0.00232015  |
| phe.Fasting_rs78703708 | S7 | FAF2       | rs34801978  | S3  | HOXB2       | 7.68E-06 | 1.00E+00    | 3.64E-03    | 1.06E-06 | 1           | 1.19E-03    |
| phe.Fasting_rs78703708 | S7 | FAF2       | rs7004597   | S8  | NA          | 8.36E-12 | 3.42E-04    | 1.39E-08    | 9.35E-09 | 0.380407    | 1.76E-05    |
| phe.Fasting_rs78703708 | S7 | FAF2       | rs7256517   | S7  | CYTH2       | 1.89E-05 | 1           | 0.00791997  | 2.95E-07 | 1           | 0.000373655 |
| phe.Fasting_rs78703708 | S7 | FAF2       | rs73392640  | S8  | POLR3B      | 9.03E-11 | 0.003687    | 1.18E-07    | 3.66E-09 | 0.149081    | 7.58E-06    |
| phe.Fasting_rs78703708 | S7 | FAF2       | rs75758702  | S24 | NA          | 5.82E-07 | 1           | 3.76E-04    | 4.84E-06 | 1           | 0.00444835  |
| phe.Fasting_rs78703708 | S7 | FAF2       | rs78353402  | S8  | AP3M2       | 8.36E-12 | 0.000341574 | 1.39E-08    | 1.76E-08 | 0.717274    | 3.07E-05    |
| phe.Fasting_rs78722272 | S5 | CNTLN      | rs115083290 | S19 | NA          | 3.88E-09 | 0.158556    | 3.87E-06    | 6.13E-17 | 2.49E-09    | 4.22E-12    |
| phe.Fasting_rs78722272 | S5 | CNTLN      | rs115752779 | S19 | NA          | 3.88E-09 | 0.158556    | 3.87E-06    | 6.13E-17 | 2.49E-09    | 4.22E-12    |
| phe.Fasting_rs78722272 | S5 | CNTLN      | rs139070959 | S8  | RPN2        | 1.05E-17 | 4.28E-10    | 9.93E-14    | 3.49E-12 | 0.000142251 | 1.47E-08    |
| phe.Fasting_rs78722272 | S5 | CNTLN      | rs145412529 | S8  | "RBL1,RPS3A | 5.93E-18 | 2.42E-10    | 7.36E-14    | 4.12E-10 | 0.0167508   | 1.08E-06    |
| phe.Fasting_rs78722272 | S5 | CNTLN      | rs57503635  | S3  | NA          | 1.70E-06 | 1           | 0.000972728 | 8.65E-16 | 3.52E-08    | 1.16E-11    |
| phe.Fasting_rs78722272 | S5 | CNTLN      | rs78516788  | S8  | SLC38A1     | 7.72E-18 | 3.15E-10    | 8.50E-14    | 3.32E-07 | 1           | 0.000414511 |
| phe.Fasting_rs78736524 | S5 | KPNA3      | rs140524622 | S7  | MRPL10      | 3.78E-08 | 1           | 3.18E-05    | 1.56E-16 | 6.34E-09    | 6.88E-12    |
| phe.Fasting_rs78736524 | S5 | KPNA3      | rs57503635  | S3  | NA          | 1.29E-15 | 5.25E-08    | 3.74E-12    | 4.33E-15 | 1.76E-07    | 4.03E-11    |
| phe.Fasting_rs78736524 | S5 | KPNA3      | rs7256517   | S7  | CYTH2       | 1.78E-05 | 1           | 7.54E-03    | 1.17E-06 | 1           | 0.00129677  |
| phe.Fasting_rs78736524 | S5 | KPNA3      | rs75506779  | S5  | TMCO3       | 2.52E-06 | 1           | 1.37E-03    | 2.54E-15 | 1.03E-07    | 2.48E-11    |
| phe.Fasting_rs78990344 | S2 | LOC1005063 | rs112348319 | S8  | SPTLC1      | 1.78E-07 | 1           | 1.28E-04    | 3.54E-06 | 1           | 0.00338388  |
| phe.Fasting_rs78990344 | S2 | LOC1005063 | rs112608164 | S8  | SPTLC1      | 1.78E-07 | 1           | 1.28E-04    | 3.54E-06 | 1           | 0.00338388  |
| phe.Fasting_rs78990344 | S2 | LOC1005063 | rs115787552 | S5  | KPNA3       | 1.88E-06 | 1           | 1.06E-03    | 3.73E-15 | 1.52E-07    | 3.54E-11    |
| phe.Fasting_rs78990344 | S2 | LOC1005063 | rs115888477 | S8  | NA          | 9.13E-06 | 1           | 4.22E-03    | 5.84E-16 | 2.38E-08    | 1.16E-11    |
| phe.Fasting_rs78990344 | S2 | LOC1005063 | rs116079984 | S8  | KPNA3       | 1.88E-06 | 1.00E+00    | 1.06E-03    | 4.41E-15 | 1.80E-07    | 4.10E-11    |
| phe.Fasting_rs78990344 | S2 | LOC1005063 | rs146815317 | S5  | KPNA3       | 1.88E-06 | 1           | 0.00106213  | 3.73E-15 | 1.52E-07    | 3.54E-11    |
| phe.Fasting_rs78990344 | S2 | LOC1005063 | rs150117838 | S8  | KPNA3       | 1.88E-06 | 1.00E+00    | 1.06E-03    | 3.54E-15 | 1.44E-07    | 3.37E-11    |
| phe.Fasting_rs78990344 | S2 | LOC1005063 | rs73283603  | S7  | ZWINT       | 3.14E-16 | 1.28E-08    | 1.04E-12    | 6.26E-09 | 0.254707    | 1.22E-05    |
| phe.Fasting_rs78990344 | S2 | LOC1005063 | rs73392640  | S8  | POLR3B      | 1.29E-10 | 0.00525587  | 1.64E-07    | 9.02E-11 | 0.00367219  | 2.78E-07    |
| phe.Fasting_rs78990344 | S2 | LOC1005063 | rs75758702  | S24 | NA          | 9.04E-08 | 1           | 6.96E-05    | 3.15E-06 | 1           | 0.00305065  |

|                        |     |                       |             |        |             |          |             |            |          |             |             |
|------------------------|-----|-----------------------|-------------|--------|-------------|----------|-------------|------------|----------|-------------|-------------|
| phe.Fasting_rs78990344 | S2  | LOC1005063:rs76542405 | S5          | SPTLC1 | 1.78E-07    | 1        | 1.28E-04    | 3.54E-06   | 1        | 0.00338388  |             |
| phe.Fasting_rs78990344 | S2  | LOC1005063:rs77523818 | S7          | SPTLC1 | 1.78E-07    | 1.00E+00 | 1.28E-04    | 3.54E-06   | 1        | 0.00338388  |             |
| phe.Fasting_rs78990344 | S2  | LOC1005063:rs77798597 | S7          | KPNA3  | 1.88E-06    | 1.00E+00 | 1.06E-03    | 3.54E-15   | 1.44E-07 | 3.37E-11    |             |
| phe.Fasting_rs78990344 | S2  | LOC1005063:rs78736524 | S5          | KPNA3  | 1.88E-06    | 1        | 1.06E-03    | 3.73E-15   | 1.52E-07 | 3.54E-11    |             |
| phe.Fasting_rs78990344 | S2  | LOC1005063:rs79781495 | S8          | KPNA3  | 1.88E-06    | 1        | 0.00106213  | 3.54E-15   | 1.44E-07 | 3.37E-11    |             |
| phe.Fasting_rs78990344 | S2  | LOC1005063:rs80332465 | S5          | KPNA3  | 1.90E-06    | 1        | 0.00107061  | 3.82E-15   | 1.55E-07 | 3.60E-11    |             |
| phe.Fasting_rs78990344 | S2  | LOC1005063:rs80334773 | S5          | KPNA3  | 1.90E-06    | 1        | 0.00107061  | 3.82E-15   | 1.55E-07 | 3.60E-11    |             |
| phe.Fasting_rs78990344 | S2  | LOC1005063:rs8075478  | S8          | MYH10  | 1.56E-07    | 1        | 0.00011375  | 1.07E-06   | 1        | 1.20E-03    |             |
| phe.Fasting_rs79200698 | S8  | NA                    | rs111576333 | S5     | TMEM64      | 1.91E-17 | 7.80E-10    | 1.38E-13   | 7.14E-06 | 1           | 0.00616493  |
| phe.Fasting_rs79200698 | S8  | NA                    | rs11989304  | S4     | TMEM64      | 1.91E-17 | 7.80E-10    | 1.38E-13   | 6.95E-06 | 1           | 0.00602886  |
| phe.Fasting_rs79200698 | S8  | NA                    | rs73392640  | S8     | POLR3B      | 1.08E-11 | 0.000440105 | 1.71E-08   | 5.27E-06 | 1           | 0.00478458  |
| phe.Fasting_rs79200698 | S8  | NA                    | rs75949566  | S5     | TMEM64      | 1.98E-17 | 8.10E-10    | 1.42E-13   | 8.82E-06 | 1           | 0.00736536  |
| phe.Fasting_rs79200698 | S8  | NA                    | rs78990344  | S2     | LOC1005063: | 1.91E-17 | 7.80E-10    | 1.38E-13   | 6.95E-06 | 1           | 0.00602886  |
| phe.Fasting_rs79200698 | S8  | NA                    | rs842453    | S11    | ESYT2       | 1.88E-12 | 7.68E-05    | 3.57E-09   | 6.42E-07 | 1           | 0.000753508 |
| phe.Fasting_rs79389383 | S8  | PHC3                  | rs111576333 | S5     | TMEM64      | 2.10E-08 | 0.858665    | 1.85E-05   | 1.86E-10 | 0.00759018  | 5.33E-07    |
| phe.Fasting_rs79389383 | S8  | PHC3                  | rs112091318 | S5     | TMEM64      | 6.37E-09 | 0.260193    | 6.15E-06   | 2.78E-10 | 0.0113034   | 7.60E-07    |
| phe.Fasting_rs79389383 | S8  | PHC3                  | rs112348319 | S8     | SPTLC1      | 1.98E-05 | 1           | 0.00828284 | 7.96E-10 | 0.0323902   | 1.95E-06    |
| phe.Fasting_rs79389383 | S8  | PHC3                  | rs112608164 | S8     | SPTLC1      | 1.98E-05 | 1           | 0.00828284 | 7.96E-10 | 0.0323902   | 1.95E-06    |
| phe.Fasting_rs79389383 | S8  | PHC3                  | rs113568654 | S12    | SPTLC1      | 1.90E-05 | 1           | 7.97E-03   | 1.05E-08 | 0.426793    | 1.93E-05    |
| phe.Fasting_rs79389383 | S8  | PHC3                  | rs114565620 | S8     | RCL1        | 2.86E-19 | 1.17E-11    | 2.40E-14   | 4.04E-07 | 1           | 0.000492337 |
| phe.Fasting_rs79389383 | S8  | PHC3                  | rs115083290 | S19    | NA          | 8.98E-08 | 1           | 6.92E-05   | 3.42E-09 | 0.139166    | 7.15E-06    |
| phe.Fasting_rs79389383 | S8  | PHC3                  | rs115752779 | S19    | NA          | 8.98E-08 | 1           | 6.92E-05   | 3.42E-09 | 0.139166    | 7.15E-06    |
| phe.Fasting_rs79389383 | S8  | PHC3                  | rs115888477 | S8     | NA          | 1.37E-06 | 1           | 8.04E-04   | 8.02E-11 | 0.00326649  | 2.50E-07    |
| phe.Fasting_rs79389383 | S8  | PHC3                  | rs116011837 | S9     | BRD2        | 2.77E-13 | 1.13E-05    | 5.95E-10   | 2.10E-11 | 0.000853749 | 7.39E-08    |
| phe.Fasting_rs79389383 | S8  | PHC3                  | rs116120727 | S9     | BRD2        | 2.77E-13 | 1.13E-05    | 5.95E-10   | 2.10E-11 | 0.000853749 | 7.39E-08    |
| phe.Fasting_rs79389383 | S8  | PHC3                  | rs116548615 | S8     | TMEM45B     | 5.34E-19 | 2.18E-11    | 2.49E-14   | 6.36E-10 | 0.0259048   | 1.60E-06    |
| phe.Fasting_rs79389383 | S8  | PHC3                  | rs11989304  | S4     | TMEM64      | 2.10E-08 | 0.858665    | 1.85E-05   | 1.86E-10 | 0.00758489  | 5.33E-07    |
| phe.Fasting_rs79389383 | S8  | PHC3                  | rs140524622 | S7     | MRPL10      | 2.32E-08 | 9.49E-01    | 2.03E-05   | 2.15E-06 | 1           | 0.00220681  |
| phe.Fasting_rs79389383 | S8  | PHC3                  | rs141926074 | S8     | ATE1        | 1.26E-19 | 5.15E-12    | 2.23E-14   | 1.36E-11 | 0.00055511  | 4.95E-08    |
| phe.Fasting_rs79389383 | S8  | PHC3                  | rs73392640  | S8     | POLR3B      | 6.73E-08 | 1.00E+00    | 5.36E-05   | 9.08E-06 | 1           | 0.00754737  |
| phe.Fasting_rs79389383 | S8  | PHC3                  | rs74627895  | S8     | TMEM64      | 6.37E-09 | 0.260193    | 6.15E-06   | 1.02E-06 | 1           | 0.00115421  |
| phe.Fasting_rs79389383 | S8  | PHC3                  | rs75350765  | S5     | RCL1        | 2.86E-19 | 1.17E-11    | 2.40E-14   | 4.04E-07 | 1           | 0.000492337 |
| phe.Fasting_rs79389383 | S8  | PHC3                  | rs75506779  | S5     | TMCO3       | 2.11E-09 | 0.0862915   | 2.20E-06   | 2.98E-06 | 1           | 0.00291794  |
| phe.Fasting_rs79389383 | S8  | PHC3                  | rs75949566  | S5     | TMEM64      | 2.31E-08 | 0.941791    | 2.01E-05   | 3.24E-10 | 0.0132      | 8.70E-07    |
| phe.Fasting_rs79389383 | S8  | PHC3                  | rs76542405  | S5     | SPTLC1      | 1.98E-05 | 1.00E+00    | 8.28E-03   | 7.96E-10 | 0.0323902   | 1.95E-06    |
| phe.Fasting_rs79389383 | S8  | PHC3                  | rs77523818  | S7     | SPTLC1      | 1.98E-05 | 1.00E+00    | 8.28E-03   | 7.96E-10 | 0.0323902   | 1.95E-06    |
| phe.Fasting_rs79389383 | S8  | PHC3                  | rs7763107   | S8     | FARS2       | 1.31E-09 | 5.37E-02    | 1.42E-06   | 2.46E-06 | 1           | 0.0024697   |
| phe.Fasting_rs79389383 | S8  | PHC3                  | rs77845645  | S21    | NA          | 1.00E-08 | 4.10E-01    | 9.35E-06   | 9.87E-13 | 4.02E-05    | 4.68E-09    |
| phe.Fasting_rs79389383 | S8  | PHC3                  | rs78990344  | S2     | LOC1005063: | 2.10E-08 | 8.59E-01    | 1.85E-05   | 1.86E-10 | 0.00758489  | 5.33E-07    |
| phe.Fasting_rs79517926 | S15 | "DIAPH1,LOC           | rs111576333 | S5     | TMEM64      | 6.36E-07 | 1.00E+00    | 4.07E-04   | 2.93E-08 | 1           | 4.76E-05    |

|                        |     |                        |     |           |          |             |             |          |             |             |
|------------------------|-----|------------------------|-----|-----------|----------|-------------|-------------|----------|-------------|-------------|
| phe.Fasting_rs79517926 | S15 | "DIAPH1,LOCrs112009962 | S8  | NA        | 7.20E-11 | 0.00293916  | 9.55E-08    | 5.41E-06 | 1           | 0.00489237  |
| phe.Fasting_rs79517926 | S15 | "DIAPH1,LOCrs112089881 | S8  | ZFAND4    | 3.79E-18 | 1.55E-10    | 5.79E-14    | 2.44E-07 | 1           | 0.000315813 |
| phe.Fasting_rs79517926 | S15 | "DIAPH1,LOCrs112091318 | S5  | TMEM64    | 1.93E-07 | 1.00E+00    | 1.38E-04    | 4.24E-07 | 1           | 0.000515489 |
| phe.Fasting_rs79517926 | S15 | "DIAPH1,LOCrs114334325 | S7  | AP3M2     | 6.38E-13 | 2.61E-05    | 1.34E-09    | 1.14E-06 | 1           | 0.00127164  |
| phe.Fasting_rs79517926 | S15 | "DIAPH1,LOCrs114394395 | S7  | AP3M2     | 6.73E-13 | 2.75E-05    | 1.40E-09    | 1.14E-06 | 1           | 0.00127164  |
| phe.Fasting_rs79517926 | S15 | "DIAPH1,LOCrs114565620 | S8  | RCL1      | 2.29E-17 | 9.35E-10    | 1.46E-13    | 6.41E-08 | 1           | 9.60E-05    |
| phe.Fasting_rs79517926 | S15 | "DIAPH1,LOCrs115083290 | S19 | NA        | 9.94E-17 | 4.06E-09    | 4.24E-13    | 1.78E-09 | 0.0726506   | 3.98E-06    |
| phe.Fasting_rs79517926 | S15 | "DIAPH1,LOCrs115752779 | S19 | NA        | 9.94E-17 | 4.06E-09    | 4.24E-13    | 1.78E-09 | 0.0726506   | 3.98E-06    |
| phe.Fasting_rs79517926 | S15 | "DIAPH1,LOCrs115787552 | S5  | KPNA3     | 7.26E-16 | 2.96E-08    | 2.22E-12    | 3.07E-19 | 1.25E-11    | 3.60E-13    |
| phe.Fasting_rs79517926 | S15 | "DIAPH1,LOCrs115888477 | S8  | NA        | 5.65E-15 | 2.31E-07    | 1.47E-11    | 1.06E-16 | 4.32E-09    | 5.87E-12    |
| phe.Fasting_rs79517926 | S15 | "DIAPH1,LOCrs116011837 | S9  | BRD2      | 1.30E-11 | 5.31E-04    | 2.02E-08    | 2.01E-15 | 8.17E-08    | 2.11E-11    |
| phe.Fasting_rs79517926 | S15 | "DIAPH1,LOCrs116079984 | S8  | KPNA3     | 7.26E-16 | 2.96E-08    | 2.22E-12    | 3.52E-19 | 1.43E-11    | 3.88E-13    |
| phe.Fasting_rs79517926 | S15 | "DIAPH1,LOCrs116120727 | S9  | BRD2      | 1.30E-11 | 0.00053113  | 2.02E-08    | 2.01E-15 | 8.17E-08    | 2.11E-11    |
| phe.Fasting_rs79517926 | S15 | "DIAPH1,LOCrs116129306 | S3  | MICA      | 6.00E-06 | 1           | 0.00292457  | 4.27E-06 | 1           | 0.00399221  |
| phe.Fasting_rs79517926 | S15 | "DIAPH1,LOCrs116406581 | S2  | NA        | 2.69E-12 | 0.000109753 | 4.97E-09    | 9.06E-06 | 1           | 0.0075327   |
| phe.Fasting_rs79517926 | S15 | "DIAPH1,LOCrs116548615 | S8  | TMEM45B   | 1.02E-07 | 1           | 7.76E-05    | 4.05E-08 | 1           | 6.34E-05    |
| phe.Fasting_rs79517926 | S15 | "DIAPH1,LOCrs116696844 | S3  | AP3M2     | 8.85E-13 | 3.61E-05    | 1.83E-09    | 1.14E-06 | 1           | 0.00127164  |
| phe.Fasting_rs79517926 | S15 | "DIAPH1,LOCrs11989304  | S4  | TMEM64    | 6.36E-07 | 1           | 0.000406633 | 2.51E-07 | 1           | 0.000323549 |
| phe.Fasting_rs79517926 | S15 | "DIAPH1,LOCrs140524622 | S7  | MRPL10    | 2.74E-17 | 1.12E-09    | 1.64E-13    | 2.76E-09 | 0.112213    | 5.88E-06    |
| phe.Fasting_rs79517926 | S15 | "DIAPH1,LOCrs146815317 | S5  | KPNA3     | 7.26E-16 | 2.96E-08    | 2.22E-12    | 3.07E-19 | 1.25E-11    | 3.60E-13    |
| phe.Fasting_rs79517926 | S15 | "DIAPH1,LOCrs150117838 | S8  | KPNA3     | 7.26E-16 | 2.96E-08    | 2.22E-12    | 2.85E-19 | 1.16E-11    | 3.60E-13    |
| phe.Fasting_rs79517926 | S15 | "DIAPH1,LOCrs150916187 | S4  | HIST1H2BK | 7.78E-06 | 1           | 0.00367688  | 4.86E-20 | 1.98E-12    | 8.25E-14    |
| phe.Fasting_rs79517926 | S15 | "DIAPH1,LOCrs16894241  | S4  | HIST1H2BK | 9.78E-12 | 0.000399226 | 1.56E-08    | 2.78E-19 | 1.13E-11    | 3.60E-13    |
| phe.Fasting_rs79517926 | S15 | "DIAPH1,LOCrs2000418   | S7  | TTC3      | 2.18E-10 | 0.00890034  | 2.67E-07    | 1.68E-06 | 1           | 0.00177595  |
| phe.Fasting_rs79517926 | S15 | "DIAPH1,LOCrs2032062   | S8  | NA        | 1.12E-14 | 4.56E-07    | 2.84E-11    | 4.99E-07 | 1           | 0.000595664 |
| phe.Fasting_rs79517926 | S15 | "DIAPH1,LOCrs2257163   | S7  | TTC3      | 1.96E-10 | 0.00798756  | 2.42E-07    | 1.70E-06 | 1           | 0.00179947  |
| phe.Fasting_rs79517926 | S15 | "DIAPH1,LOCrs2298326   | S7  | TTC3      | 2.63E-10 | 0.0107252   | 3.17E-07    | 1.70E-06 | 1           | 0.00179947  |
| phe.Fasting_rs79517926 | S15 | "DIAPH1,LOCrs2835632   | S7  | TTC3      | 1.96E-10 | 0.00798756  | 2.42E-07    | 1.70E-06 | 1           | 0.00179947  |
| phe.Fasting_rs79517926 | S15 | "DIAPH1,LOCrs2835656   | S7  | TTC3      | 1.96E-10 | 0.00800994  | 2.42E-07    | 6.61E-07 | 1           | 0.00077454  |
| phe.Fasting_rs79517926 | S15 | "DIAPH1,LOCrs57503635  | S3  | NA        | 1.45E-16 | 5.93E-09    | 5.72E-13    | 3.68E-12 | 0.000149984 | 1.53E-08    |
| phe.Fasting_rs79517926 | S15 | "DIAPH1,LOCrs58905476  | S7  | TTC3      | 2.15E-10 | 0.00879785  | 2.65E-07    | 6.01E-07 | 1           | 0.000709728 |
| phe.Fasting_rs79517926 | S15 | "DIAPH1,LOCrs60011869  | S16 | NA        | 2.87E-06 | 1           | 0.00152008  | 3.50E-06 | 1           | 0.00335354  |
| phe.Fasting_rs79517926 | S15 | "DIAPH1,LOCrs7004597   | S8  | NA        | 6.38E-13 | 2.61E-05    | 1.34E-09    | 9.68E-06 | 1           | 0.00794822  |
| phe.Fasting_rs79517926 | S15 | "DIAPH1,LOCrs7256517   | S7  | CYTH2     | 4.22E-07 | 1           | 2.82E-04    | 8.63E-10 | 0.0351281   | 2.08E-06    |
| phe.Fasting_rs79517926 | S15 | "DIAPH1,LOCrs7275757   | S7  | TTC3      | 2.15E-10 | 0.00879785  | 2.65E-07    | 1.62E-06 | 1           | 0.00171838  |
| phe.Fasting_rs79517926 | S15 | "DIAPH1,LOCrs7284020   | S7  | TTC3      | 2.88E-10 | 0.0117607   | 3.46E-07    | 1.62E-06 | 1           | 0.00171838  |
| phe.Fasting_rs79517926 | S15 | "DIAPH1,LOCrs73283603  | S7  | ZWINT     | 6.80E-07 | 1           | 0.000431577 | 7.83E-07 | 1           | 0.00090319  |
| phe.Fasting_rs79517926 | S15 | "DIAPH1,LOCrs73391005  | S8  | TTC3      | 2.18E-10 | 0.00890034  | 2.67E-07    | 1.69E-06 | 1           | 0.0017824   |
| phe.Fasting_rs79517926 | S15 | "DIAPH1,LOCrs73391173  | S8  | TTC3      | 2.18E-10 | 0.00890034  | 2.67E-07    | 1.68E-06 | 1           | 0.00177595  |
| phe.Fasting_rs79517926 | S15 | "DIAPH1,LOCrs73392640  | S8  | POLR3B    | 6.27E-11 | 0.00255856  | 8.39E-08    | 1.23E-13 | 5.00E-06    | 7.33E-10    |

|                        |     |                       |             |             |          |             |          |            |             |             |            |
|------------------------|-----|-----------------------|-------------|-------------|----------|-------------|----------|------------|-------------|-------------|------------|
| phe.Fasting_rs79517926 | S15 | "DIAPH1,LOCrs73407968 | S8          | TTC3        | 2.64E-10 | 0.0107984   | 3.19E-07 | 1.71E-06   | 1           | 0.00180267  |            |
| phe.Fasting_rs79517926 | S15 | "DIAPH1,LOCrs73619637 | S8          | NA          | 4.78E-10 | 0.0195229   | 5.48E-07 | 2.55E-09   | 0.103962    | 5.49E-06    |            |
| phe.Fasting_rs79517926 | S15 | "DIAPH1,LOCrs74627895 | S8          | TMEM64      | 1.93E-07 | 1           | 1.38E-04 | 2.24E-06   | 1           | 0.00228612  |            |
| phe.Fasting_rs79517926 | S15 | "DIAPH1,LOCrs74914207 | S24         | NA          | 3.23E-11 | 0.00131905  | 4.55E-08 | 2.22E-15   | 9.02E-08    | 2.24E-11    |            |
| phe.Fasting_rs79517926 | S15 | "DIAPH1,LOCrs75350765 | S5          | RCL1        | 2.29E-17 | 9.35E-10    | 1.46E-13 | 6.41E-08   | 1           | 9.60E-05    |            |
| phe.Fasting_rs79517926 | S15 | "DIAPH1,LOCrs75374128 | S5          | CNTLN       | 2.81E-17 | 1.15E-09    | 1.64E-13 | 9.10E-09   | 0.37057     | 1.72E-05    |            |
| phe.Fasting_rs79517926 | S15 | "DIAPH1,LOCrs75506779 | S5          | TMCO3       | 1.34E-07 | 1           | 9.89E-05 | 2.45E-08   | 0.99824     | 4.05E-05    |            |
| phe.Fasting_rs79517926 | S15 | "DIAPH1,LOCrs75864203 | S8          | CNTLN       | 2.81E-17 | 1.15E-09    | 1.64E-13 | 9.10E-09   | 0.37057     | 1.72E-05    |            |
| phe.Fasting_rs79517926 | S15 | "DIAPH1,LOCrs75949566 | S5          | TMEM64      | 7.51E-07 | 1           | 4.70E-04 | 2.55E-07   | 1           | 0.000328993 |            |
| phe.Fasting_rs79517926 | S15 | "DIAPH1,LOCrs76844308 | S8          | CNTLN       | 1.42E-17 | 5.81E-10    | 1.15E-13 | 4.70E-11   | 0.00191221  | 1.52E-07    |            |
| phe.Fasting_rs79517926 | S15 | "DIAPH1,LOCrs7763107  | S8          | FARS2       | 1.85E-07 | 1           | 1.33E-04 | 5.77E-13   | 2.35E-05    | 2.85E-09    |            |
| phe.Fasting_rs79517926 | S15 | "DIAPH1,LOCrs77798597 | S7          | KPNA3       | 7.26E-16 | 2.96E-08    | 2.22E-12 | 2.85E-19   | 1.16E-11    | 3.60E-13    |            |
| phe.Fasting_rs79517926 | S15 | "DIAPH1,LOCrs78353402 | S8          | AP3M2       | 6.38E-13 | 2.61E-05    | 1.34E-09 | 1.14E-06   | 1           | 1.27E-03    |            |
| phe.Fasting_rs79517926 | S15 | "DIAPH1,LOCrs78516788 | S8          | SLC38A1     | 2.26E-12 | 9.22E-05    | 4.23E-09 | 3.62E-09   | 0.147177    | 7.50E-06    |            |
| phe.Fasting_rs79517926 | S15 | "DIAPH1,LOCrs78697063 | S5          | MSI2        | 4.09E-10 | 0.0167096   | 4.75E-07 | 3.64E-08   | 1           | 5.76E-05    |            |
| phe.Fasting_rs79517926 | S15 | "DIAPH1,LOCrs78703708 | S7          | FAF2        | 9.41E-12 | 0.000384366 | 1.51E-08 | 8.23E-09   | 0.335042    | 1.57E-05    |            |
| phe.Fasting_rs79517926 | S15 | "DIAPH1,LOCrs78722272 | S5          | CNTLN       | 2.81E-17 | 1.15E-09    | 1.64E-13 | 9.56E-09   | 0.38931     | 1.80E-05    |            |
| phe.Fasting_rs79517926 | S15 | "DIAPH1,LOCrs78736524 | S5          | KPNA3       | 7.26E-16 | 2.96E-08    | 2.22E-12 | 3.07E-19   | 1.25E-11    | 3.60E-13    |            |
| phe.Fasting_rs79517926 | S15 | "DIAPH1,LOCrs78990344 | S2          | LOC10050631 | 6.36E-07 | 1           | 4.07E-04 | 2.51E-07   | 1           | 0.000323549 |            |
| phe.Fasting_rs79517926 | S15 | "DIAPH1,LOCrs79781495 | S8          | KPNA3       | 7.26E-16 | 2.96E-08    | 2.22E-12 | 2.85E-19   | 1.16E-11    | 3.60E-13    |            |
| phe.Fasting_rs79517926 | S15 | "DIAPH1,LOCrs79886603 | S15         | NA          | 3.93E-08 | 1           | 3.29E-05 | 6.47E-12   | 0.000263517 | 2.50E-08    |            |
| phe.Fasting_rs79517926 | S15 | "DIAPH1,LOCrs80200953 | S8          | PPP2R5D     | 5.08E-08 | 1           | 4.15E-05 | 4.87E-10   | 0.0198162   | 1.27E-06    |            |
| phe.Fasting_rs79517926 | S15 | "DIAPH1,LOCrs80332465 | S5          | KPNA3       | 7.70E-16 | 3.15E-08    | 2.35E-12 | 3.18E-19   | 1.29E-11    | 3.60E-13    |            |
| phe.Fasting_rs79517926 | S15 | "DIAPH1,LOCrs80334773 | S5          | KPNA3       | 7.70E-16 | 3.15E-08    | 2.35E-12 | 3.18E-19   | 1.29E-11    | 3.60E-13    |            |
| phe.Fasting_rs79518241 | S6  | PHC3                  | rs111576333 | S5          | TMEM64   | 2.07E-08    | 0.844108 | 1.82E-05   | 2.31E-10    | 0.00941342  | 6.43E-07   |
| phe.Fasting_rs79518241 | S6  | PHC3                  | rs112091318 | S5          | TMEM64   | 6.28E-09    | 0.256524 | 6.07E-06   | 3.37E-10    | 0.013698    | 8.96E-07   |
| phe.Fasting_rs79518241 | S6  | PHC3                  | rs112348319 | S8          | SPTLC1   | 1.92E-05    | 1        | 8.06E-03   | 7.84E-10    | 0.0319139   | 1.93E-06   |
| phe.Fasting_rs79518241 | S6  | PHC3                  | rs112608164 | S8          | SPTLC1   | 1.92E-05    | 1        | 0.00806329 | 7.84E-10    | 0.0319139   | 1.93E-06   |
| phe.Fasting_rs79518241 | S6  | PHC3                  | rs113568654 | S12         | SPTLC1   | 1.84E-05    | 1        | 0.00776102 | 1.04E-08    | 0.421423    | 1.91E-05   |
| phe.Fasting_rs79518241 | S6  | PHC3                  | rs114565620 | S8          | RCL1     | 2.84E-19    | 1.16E-11 | 2.40E-14   | 4.01E-07    | 1           | 4.90E-04   |
| phe.Fasting_rs79518241 | S6  | PHC3                  | rs115083290 | S19         | NA       | 8.85E-08    | 1        | 6.83E-05   | 3.40E-09    | 0.138522    | 7.12E-06   |
| phe.Fasting_rs79518241 | S6  | PHC3                  | rs115752779 | S19         | NA       | 8.85E-08    | 1        | 6.83E-05   | 3.40E-09    | 0.138522    | 7.12E-06   |
| phe.Fasting_rs79518241 | S6  | PHC3                  | rs115888477 | S8          | NA       | 1.34E-06    | 1        | 7.91E-04   | 7.82E-11    | 0.00318365  | 2.44E-07   |
| phe.Fasting_rs79518241 | S6  | PHC3                  | rs116011837 | S9          | BRD2     | 2.70E-13    | 1.10E-05 | 5.81E-10   | 2.07E-11    | 0.000841008 | 7.31E-08   |
| phe.Fasting_rs79518241 | S6  | PHC3                  | rs116120727 | S9          | BRD2     | 2.70E-13    | 1.10E-05 | 5.81E-10   | 2.07E-11    | 0.000841008 | 7.31E-08   |
| phe.Fasting_rs79518241 | S6  | PHC3                  | rs116548615 | S8          | TMEM45B  | 5.29E-19    | 2.16E-11 | 2.49E-14   | 7.92E-10    | 0.0322544   | 1.95E-06   |
| phe.Fasting_rs79518241 | S6  | PHC3                  | rs11989304  | S4          | TMEM64   | 2.07E-08    | 0.844108 | 1.82E-05   | 2.29E-10    | 0.00932569  | 6.39E-07   |
| phe.Fasting_rs79518241 | S6  | PHC3                  | rs140524622 | S7          | MRPL10   | 2.30E-08    | 0.93902  | 2.01E-05   | 2.14E-06    | 1           | 2.19E-03   |
| phe.Fasting_rs79518241 | S6  | PHC3                  | rs141926074 | S8          | ATE1     | 1.23E-19    | 5.04E-12 | 2.23E-14   | 1.34E-11    | 0.000545558 | 4.89E-08   |
| phe.Fasting_rs79518241 | S6  | PHC3                  | rs73392640  | S8          | POLR3B   | 6.58E-08    | 1        | 5.26E-05   | 8.97E-06    | 1           | 0.00747055 |

|                        |     |        |             |     |             |          |             |             |          |            |             |
|------------------------|-----|--------|-------------|-----|-------------|----------|-------------|-------------|----------|------------|-------------|
| phe.Fasting_rs79518241 | S6  | PHC3   | rs74627895  | S8  | TMEM64      | 6.28E-09 | 0.256524    | 6.07E-06    | 1.27E-06 | 1          | 0.00139909  |
| phe.Fasting_rs79518241 | S6  | PHC3   | rs75350765  | S5  | RCL1        | 2.84E-19 | 1.16E-11    | 2.40E-14    | 4.01E-07 | 1          | 0.000489631 |
| phe.Fasting_rs79518241 | S6  | PHC3   | rs75506779  | S5  | TMCO3       | 7.38E-14 | 3.01E-06    | 1.70E-10    | 3.50E-06 | 1          | 0.00334821  |
| phe.Fasting_rs79518241 | S6  | PHC3   | rs75949566  | S5  | TMEM64      | 2.26E-08 | 0.923876    | 1.98E-05    | 3.24E-10 | 0.0132     | 8.70E-07    |
| phe.Fasting_rs79518241 | S6  | PHC3   | rs76542405  | S5  | SPTLC1      | 1.92E-05 | 1           | 0.00806329  | 7.84E-10 | 0.0319139  | 1.93E-06    |
| phe.Fasting_rs79518241 | S6  | PHC3   | rs77523818  | S7  | SPTLC1      | 1.92E-05 | 1           | 0.00806329  | 7.84E-10 | 0.0319139  | 1.93E-06    |
| phe.Fasting_rs79518241 | S6  | PHC3   | rs7763107   | S8  | FARS2       | 1.30E-09 | 0.0532742   | 1.41E-06    | 2.87E-06 | 1          | 0.00281845  |
| phe.Fasting_rs79518241 | S6  | PHC3   | rs77845645  | S21 | NA          | 9.87E-09 | 0.403004    | 9.22E-06    | 9.90E-13 | 4.03E-05   | 4.68E-09    |
| phe.Fasting_rs79518241 | S6  | PHC3   | rs78990344  | S2  | LOC10050631 | 2.07E-08 | 0.844108    | 1.82E-05    | 2.29E-10 | 0.00932569 | 6.39E-07    |
| phe.Fasting_rs79661125 | S8  | FAM73A | rs116011837 | S9  | BRD2        | 2.10E-07 | 1           | 0.000149195 | 1.44E-07 | 1          | 0.000196589 |
| phe.Fasting_rs79661125 | S8  | FAM73A | rs116120727 | S9  | BRD2        | 2.10E-07 | 1           | 0.000149195 | 1.44E-07 | 1          | 0.000196589 |
| phe.Fasting_rs79781495 | S8  | KPNA3  | rs140524622 | S7  | MRPL10      | 3.78E-08 | 1           | 3.18E-05    | 1.50E-16 | 6.10E-09   | 6.88E-12    |
| phe.Fasting_rs79781495 | S8  | KPNA3  | rs57503635  | S3  | NA          | 1.29E-15 | 5.25E-08    | 3.74E-12    | 4.13E-15 | 1.68E-07   | 3.85E-11    |
| phe.Fasting_rs79781495 | S8  | KPNA3  | rs7256517   | S7  | CYTH2       | 1.78E-05 | 1           | 0.00753655  | 1.34E-06 | 1          | 0.00147054  |
| phe.Fasting_rs79781495 | S8  | KPNA3  | rs75506779  | S5  | TMCO3       | 2.52E-06 | 1           | 0.00136748  | 2.40E-15 | 9.76E-08   | 2.35E-11    |
| phe.Fasting_rs79886603 | S15 | NA     | rs115787552 | S5  | KPNA3       | 9.92E-06 | 1           | 0.00454412  | 2.86E-08 | 1          | 4.67E-05    |
| phe.Fasting_rs79886603 | S15 | NA     | rs116079984 | S8  | KPNA3       | 9.92E-06 | 1           | 0.00454412  | 4.96E-08 | 1          | 7.62E-05    |
| phe.Fasting_rs79886603 | S15 | NA     | rs140524622 | S7  | MRPL10      | 2.86E-07 | 1           | 0.000198206 | 1.44E-10 | 0.00587104 | 4.32E-07    |
| phe.Fasting_rs79886603 | S15 | NA     | rs146815317 | S5  | KPNA3       | 9.92E-06 | 1           | 0.00454412  | 2.86E-08 | 1          | 4.67E-05    |
| phe.Fasting_rs79886603 | S15 | NA     | rs150117838 | S8  | KPNA3       | 9.92E-06 | 1           | 0.00454412  | 3.69E-08 | 1          | 5.84E-05    |
| phe.Fasting_rs79886603 | S15 | NA     | rs73619637  | S8  | NA          | 8.53E-08 | 1           | 6.61E-05    | 7.24E-07 | 1          | 0.000840717 |
| phe.Fasting_rs79886603 | S15 | NA     | rs77798597  | S7  | KPNA3       | 9.92E-06 | 1           | 0.00454412  | 3.69E-08 | 1          | 5.84E-05    |
| phe.Fasting_rs79886603 | S15 | NA     | rs78736524  | S5  | KPNA3       | 9.92E-06 | 1           | 0.00454412  | 2.86E-08 | 1          | 4.67E-05    |
| phe.Fasting_rs79886603 | S15 | NA     | rs79781495  | S8  | KPNA3       | 9.92E-06 | 1           | 0.00454412  | 3.69E-08 | 1          | 5.84E-05    |
| phe.Fasting_rs79886603 | S15 | NA     | rs80332465  | S5  | KPNA3       | 1.03E-05 | 1           | 0.0046791   | 3.90E-08 | 1          | 6.12E-05    |
| phe.Fasting_rs79886603 | S15 | NA     | rs80334773  | S5  | KPNA3       | 1.03E-05 | 1           | 0.0046791   | 3.90E-08 | 1          | 6.12E-05    |
| phe.Fasting_rs79891104 | S8  | LUZP1  | rs112348319 | S8  | SPTLC1      | 5.05E-06 | 1           | 0.00250864  | 4.97E-08 | 1          | 7.63E-05    |
| phe.Fasting_rs79891104 | S8  | LUZP1  | rs112608164 | S8  | SPTLC1      | 5.05E-06 | 1           | 0.00250864  | 4.97E-08 | 1          | 7.63E-05    |
| phe.Fasting_rs79891104 | S8  | LUZP1  | rs113568654 | S12 | SPTLC1      | 4.70E-06 | 1           | 0.00236049  | 3.56E-07 | 1          | 0.000442475 |
| phe.Fasting_rs79891104 | S8  | LUZP1  | rs76542405  | S5  | SPTLC1      | 5.05E-06 | 1           | 0.00250864  | 4.97E-08 | 1          | 7.63E-05    |
| phe.Fasting_rs79891104 | S8  | LUZP1  | rs77523818  | S7  | SPTLC1      | 5.05E-06 | 1           | 0.00250864  | 4.97E-08 | 1          | 7.63E-05    |
| phe.Fasting_rs80157533 | S8  | NEK1   | rs112027720 | S7  | DIAPH1      | 9.17E-12 | 0.000374383 | 1.48E-08    | 9.70E-09 | 0.394978   | 1.81E-05    |
| phe.Fasting_rs80157533 | S8  | NEK1   | rs112089881 | S8  | ZFAND4      | 1.84E-18 | 7.51E-11    | 3.89E-14    | 2.77E-09 | 0.112698   | 5.90E-06    |
| phe.Fasting_rs80157533 | S8  | NEK1   | rs113219478 | S7  | DIAPH1      | 9.17E-12 | 0.000374383 | 1.48E-08    | 9.70E-09 | 0.394978   | 1.81E-05    |
| phe.Fasting_rs80157533 | S8  | NEK1   | rs113357907 | S24 | ISL1        | 6.12E-18 | 2.50E-10    | 7.50E-14    | 4.03E-16 | 1.64E-08   | 1.16E-11    |
| phe.Fasting_rs80157533 | S8  | NEK1   | rs115888477 | S8  | NA          | 2.70E-15 | 1.10E-07    | 7.57E-12    | 2.67E-06 | 1          | 0.00264447  |
| phe.Fasting_rs80157533 | S8  | NEK1   | rs116011837 | S9  | BRD2        | 2.29E-17 | 9.34E-10    | 1.45E-13    | 8.57E-11 | 0.00348829 | 2.64E-07    |
| phe.Fasting_rs80157533 | S8  | NEK1   | rs116120727 | S9  | BRD2        | 2.29E-17 | 9.34E-10    | 1.45E-13    | 8.57E-11 | 0.00348829 | 2.64E-07    |
| phe.Fasting_rs80157533 | S8  | NEK1   | rs116279995 | S20 | "PCDHGA4, P | 2.15E-05 | 1           | 0.00887266  | 9.47E-08 | 1          | 0.000134747 |
| phe.Fasting_rs80157533 | S8  | NEK1   | rs138090701 | S5  | HDAC3       | 1.02E-12 | 4.17E-05    | 2.10E-09    | 4.63E-09 | 0.188358   | 9.27E-06    |

|                        |    |      |                |             |          |             |             |          |           |             |
|------------------------|----|------|----------------|-------------|----------|-------------|-------------|----------|-----------|-------------|
| phe.Fasting_rs80157533 | S8 | NEK1 | rs138136869S7  | DIAPH1      | 1.65E-12 | 6.74E-05    | 3.16E-09    | 1.25E-09 | 0.0510001 | 2.90E-06    |
| phe.Fasting_rs80157533 | S8 | NEK1 | rs138457103S10 | DIAPH1      | 5.43E-12 | 0.000221795 | 9.60E-09    | 9.11E-09 | 0.370794  | 1.72E-05    |
| phe.Fasting_rs80157533 | S8 | NEK1 | rs138487229S11 | DIAPH1      | 9.17E-12 | 0.000374383 | 1.48E-08    | 9.70E-09 | 0.394978  | 1.81E-05    |
| phe.Fasting_rs80157533 | S8 | NEK1 | rs138738950S8  | "PCDHGB2,Pi | 9.17E-12 | 0.000374383 | 1.48E-08    | 9.66E-09 | 0.393262  | 1.81E-05    |
| phe.Fasting_rs80157533 | S8 | NEK1 | rs139297927S8  | DIAPH1      | 9.17E-12 | 0.000374383 | 1.48E-08    | 9.70E-09 | 0.394978  | 1.81E-05    |
| phe.Fasting_rs80157533 | S8 | NEK1 | rs139337303S8  | DIAPH1      | 9.17E-12 | 0.000374383 | 1.48E-08    | 9.70E-09 | 0.394978  | 1.81E-05    |
| phe.Fasting_rs80157533 | S8 | NEK1 | rs139403963S8  | DIAPH1      | 1.65E-12 | 6.74E-05    | 3.16E-09    | 1.25E-09 | 0.0510001 | 2.90E-06    |
| phe.Fasting_rs80157533 | S8 | NEK1 | rs139621309S18 | "LOC1005056 | 9.17E-12 | 0.000374383 | 1.48E-08    | 9.70E-09 | 0.394978  | 1.81E-05    |
| phe.Fasting_rs80157533 | S8 | NEK1 | rs139828110S8  | DIAPH1      | 1.65E-12 | 6.74E-05    | 3.16E-09    | 1.25E-09 | 0.0510001 | 2.90E-06    |
| phe.Fasting_rs80157533 | S8 | NEK1 | rs140070363S8  | DIAPH1      | 9.17E-12 | 0.000374383 | 1.48E-08    | 9.70E-09 | 0.394978  | 1.81E-05    |
| phe.Fasting_rs80157533 | S8 | NEK1 | rs140644750S13 | DIAPH1      | 9.17E-12 | 0.000374383 | 1.48E-08    | 9.70E-09 | 0.394978  | 1.81E-05    |
| phe.Fasting_rs80157533 | S8 | NEK1 | rs141022544S8  | DIAPH1      | 9.17E-12 | 0.000374383 | 1.48E-08    | 9.70E-09 | 0.394978  | 1.81E-05    |
| phe.Fasting_rs80157533 | S8 | NEK1 | rs141525984S5  | DIAPH1      | 9.17E-12 | 0.000374383 | 1.48E-08    | 9.70E-09 | 0.394978  | 1.81E-05    |
| phe.Fasting_rs80157533 | S8 | NEK1 | rs141926074S8  | ATE1        | 1.33E-06 | 1           | 0.000783423 | 7.93E-15 | 3.23E-07  | 7.00E-11    |
| phe.Fasting_rs80157533 | S8 | NEK1 | rs142480565S8  | DIAPH1      | 9.17E-12 | 0.000374383 | 1.48E-08    | 9.70E-09 | 0.394978  | 1.81E-05    |
| phe.Fasting_rs80157533 | S8 | NEK1 | rs142718558S7  | "DIAPH1,LOC | 9.17E-12 | 0.000374383 | 1.48E-08    | 9.70E-09 | 0.394978  | 1.81E-05    |
| phe.Fasting_rs80157533 | S8 | NEK1 | rs142789100S8  | DIAPH1      | 1.65E-12 | 6.74E-05    | 3.16E-09    | 1.25E-09 | 0.0510001 | 2.90E-06    |
| phe.Fasting_rs80157533 | S8 | NEK1 | rs142812798S7  | DIAPH1      | 1.65E-12 | 6.74E-05    | 3.16E-09    | 1.25E-09 | 0.0510001 | 2.90E-06    |
| phe.Fasting_rs80157533 | S8 | NEK1 | rs143377827S13 | "DIAPH1,LOC | 1.45E-12 | 5.90E-05    | 2.83E-09    | 1.02E-09 | 0.0416914 | 2.43E-06    |
| phe.Fasting_rs80157533 | S8 | NEK1 | rs143691978S11 | DIAPH1      | 1.65E-12 | 6.74E-05    | 3.16E-09    | 2.15E-09 | 0.087529  | 4.71E-06    |
| phe.Fasting_rs80157533 | S8 | NEK1 | rs144081334S11 | DIAPH1      | 1.65E-12 | 6.74E-05    | 3.16E-09    | 2.15E-09 | 0.087529  | 4.71E-06    |
| phe.Fasting_rs80157533 | S8 | NEK1 | rs144613910S8  | DIAPH1      | 9.17E-12 | 0.000374383 | 1.48E-08    | 9.70E-09 | 0.394978  | 1.81E-05    |
| phe.Fasting_rs80157533 | S8 | NEK1 | rs145027704S11 | DIAPH1      | 1.65E-12 | 6.74E-05    | 3.16E-09    | 2.15E-09 | 0.087529  | 4.71E-06    |
| phe.Fasting_rs80157533 | S8 | NEK1 | rs146220673S7  | DIAPH1      | 9.17E-12 | 0.000374383 | 1.48E-08    | 9.70E-09 | 0.394978  | 1.81E-05    |
| phe.Fasting_rs80157533 | S8 | NEK1 | rs146622060S13 | DIAPH1      | 1.65E-12 | 6.74E-05    | 3.16E-09    | 2.15E-09 | 0.087529  | 4.71E-06    |
| phe.Fasting_rs80157533 | S8 | NEK1 | rs146878162S7  | DIAPH1      | 9.17E-12 | 0.000374383 | 1.48E-08    | 9.70E-09 | 0.394978  | 1.81E-05    |
| phe.Fasting_rs80157533 | S8 | NEK1 | rs1470889 S5   | ZC3H3       | 3.60E-08 | 1           | 3.04E-05    | 6.78E-07 | 1         | 0.000791674 |
| phe.Fasting_rs80157533 | S8 | NEK1 | rs1470890 S5   | ZC3H3       | 3.60E-08 | 1           | 3.04E-05    | 6.78E-07 | 1         | 0.000791674 |
| phe.Fasting_rs80157533 | S8 | NEK1 | rs147314451S8  | DIAPH1      | 9.17E-12 | 0.000374383 | 1.48E-08    | 9.70E-09 | 0.394978  | 1.81E-05    |
| phe.Fasting_rs80157533 | S8 | NEK1 | rs147417996S7  | DIAPH1      | 1.65E-12 | 6.74E-05    | 3.16E-09    | 2.15E-09 | 0.087529  | 4.71E-06    |
| phe.Fasting_rs80157533 | S8 | NEK1 | rs147506725S21 | "PCDHGA1,Pi | 2.15E-05 | 1           | 0.00887266  | 9.47E-08 | 1         | 0.000134747 |
| phe.Fasting_rs80157533 | S8 | NEK1 | rs147646948S7  | "LOC1005056 | 9.17E-12 | 0.000374383 | 1.48E-08    | 9.70E-09 | 0.394978  | 1.81E-05    |
| phe.Fasting_rs80157533 | S8 | NEK1 | rs147677041S8  | DIAPH1      | 1.65E-12 | 6.74E-05    | 3.16E-09    | 1.25E-09 | 0.0510001 | 2.90E-06    |
| phe.Fasting_rs80157533 | S8 | NEK1 | rs148116628S7  | DIAPH1      | 9.17E-12 | 3.74E-04    | 1.48E-08    | 9.70E-09 | 0.394978  | 1.81E-05    |
| phe.Fasting_rs80157533 | S8 | NEK1 | rs148423011S7  | DIAPH1      | 9.17E-12 | 0.000374383 | 1.48E-08    | 9.70E-09 | 0.394978  | 1.81E-05    |
| phe.Fasting_rs80157533 | S8 | NEK1 | rs149019627S8  | DIAPH1      | 1.65E-12 | 6.74E-05    | 3.16E-09    | 1.25E-09 | 0.0510001 | 2.90E-06    |
| phe.Fasting_rs80157533 | S8 | NEK1 | rs149075406S8  | DIAPH1      | 9.17E-12 | 0.000374383 | 1.48E-08    | 9.70E-09 | 0.394978  | 1.81E-05    |
| phe.Fasting_rs80157533 | S8 | NEK1 | rs149334783S8  | DIAPH1      | 9.17E-12 | 0.000374383 | 1.48E-08    | 9.70E-09 | 0.394978  | 1.81E-05    |
| phe.Fasting_rs80157533 | S8 | NEK1 | rs149553852S21 | "PCDHGA10,  | 2.15E-05 | 1           | 0.00887266  | 9.47E-08 | 1         | 0.000134747 |
| phe.Fasting_rs80157533 | S8 | NEK1 | rs149716949S5  | DIAPH1      | 7.67E-13 | 3.13E-05    | 1.59E-09    | 1.12E-09 | 0.0455921 | 2.64E-06    |



|                        |    |      |                |               |          |             |            |          |           |             |
|------------------------|----|------|----------------|---------------|----------|-------------|------------|----------|-----------|-------------|
| phe.Fasting_rs80157533 | S8 | NEK1 | rs149791570S5  | DIAPH1        | 1.65E-12 | 6.74E-05    | 3.16E-09   | 1.25E-09 | 0.0510001 | 2.90E-06    |
| phe.Fasting_rs80157533 | S8 | NEK1 | rs150452206S13 | "DIAPH1,LOC   | 9.17E-12 | 0.000374383 | 1.48E-08   | 9.70E-09 | 0.394978  | 1.81E-05    |
| phe.Fasting_rs80157533 | S8 | NEK1 | rs150675915S7  | DIAPH1        | 9.17E-12 | 0.000374383 | 1.48E-08   | 9.70E-09 | 0.394978  | 1.81E-05    |
| phe.Fasting_rs80157533 | S8 | NEK1 | rs150765570S7  | DIAPH1        | 9.17E-12 | 0.000374383 | 1.48E-08   | 9.70E-09 | 0.394978  | 1.81E-05    |
| phe.Fasting_rs80157533 | S8 | NEK1 | rs150992994S11 | "PCDHGA5,PI   | 9.47E-12 | 0.000386737 | 1.52E-08   | 9.38E-09 | 0.381964  | 1.77E-05    |
| phe.Fasting_rs80157533 | S8 | NEK1 | rs151204700S8  | DIAPH1        | 9.17E-12 | 0.000374383 | 1.48E-08   | 9.70E-09 | 0.394978  | 1.81E-05    |
| phe.Fasting_rs80157533 | S8 | NEK1 | rs151330468S8  | DIAPH1        | 1.65E-12 | 6.74E-05    | 3.16E-09   | 2.15E-09 | 0.087529  | 4.71E-06    |
| phe.Fasting_rs80157533 | S8 | NEK1 | rs16894241 S4  | HIST1H2BK     | 5.24E-08 | 1           | 4.28E-05   | 2.86E-07 | 1         | 0.000363243 |
| phe.Fasting_rs80157533 | S8 | NEK1 | rs180772028S8  | "DIAPH1,LOC   | 9.17E-12 | 0.000374383 | 1.48E-08   | 9.70E-09 | 0.394978  | 1.81E-05    |
| phe.Fasting_rs80157533 | S8 | NEK1 | rs181224861S7  | DIAPH1        | 9.17E-12 | 0.000374383 | 1.48E-08   | 9.70E-09 | 0.394978  | 1.81E-05    |
| phe.Fasting_rs80157533 | S8 | NEK1 | rs181247960S21 | "PCDHGA9,PI   | 2.15E-05 | 1           | 8.87E-03   | 9.47E-08 | 1         | 0.000134747 |
| phe.Fasting_rs80157533 | S8 | NEK1 | rs181824655S21 | "PCDHGB6,PI   | 2.15E-05 | 1           | 8.87E-03   | 9.47E-08 | 1         | 0.000134747 |
| phe.Fasting_rs80157533 | S8 | NEK1 | rs182714699S8  | DIAPH1        | 9.17E-12 | 0.000374383 | 1.48E-08   | 9.70E-09 | 0.394978  | 1.81E-05    |
| phe.Fasting_rs80157533 | S8 | NEK1 | rs182965141S8  | DIAPH1        | 2.01E-12 | 8.19E-05    | 3.80E-09   | 6.50E-10 | 0.0264673 | 1.63E-06    |
| phe.Fasting_rs80157533 | S8 | NEK1 | rs183597049S7  | DIAPH1        | 9.17E-12 | 3.74E-04    | 1.48E-08   | 9.70E-09 | 0.394978  | 1.81E-05    |
| phe.Fasting_rs80157533 | S8 | NEK1 | rs183980988S2  | NA            | 9.17E-12 | 3.74E-04    | 1.48E-08   | 9.70E-09 | 0.394978  | 1.81E-05    |
| phe.Fasting_rs80157533 | S8 | NEK1 | rs184233232S7  | DIAPH1        | 9.17E-12 | 3.74E-04    | 1.48E-08   | 9.70E-09 | 0.394978  | 1.81E-05    |
| phe.Fasting_rs80157533 | S8 | NEK1 | rs184509477S13 | "PCDHGB4,PI   | 9.17E-12 | 3.74E-04    | 1.48E-08   | 9.70E-09 | 0.394978  | 1.81E-05    |
| phe.Fasting_rs80157533 | S8 | NEK1 | rs185069296S15 | "LOC100505056 | 9.17E-12 | 3.74E-04    | 1.48E-08   | 9.70E-09 | 0.394978  | 1.81E-05    |
| phe.Fasting_rs80157533 | S8 | NEK1 | rs185502834S8  | DIAPH1        | 1.65E-12 | 6.74E-05    | 3.16E-09   | 1.25E-09 | 0.0510001 | 2.90E-06    |
| phe.Fasting_rs80157533 | S8 | NEK1 | rs185759881S7  | DIAPH1        | 9.17E-12 | 0.000374383 | 1.48E-08   | 9.70E-09 | 0.394978  | 1.81E-05    |
| phe.Fasting_rs80157533 | S8 | NEK1 | rs186288044S21 | "PCDHGB4,PI   | 2.15E-05 | 1           | 0.00887266 | 9.47E-08 | 1         | 0.000134747 |
| phe.Fasting_rs80157533 | S8 | NEK1 | rs187000011S11 | DIAPH1        | 9.17E-12 | 0.000374383 | 1.48E-08   | 9.70E-09 | 0.394978  | 1.81E-05    |
| phe.Fasting_rs80157533 | S8 | NEK1 | rs188981295S5  | "RPS27AP10,   | 9.17E-12 | 0.000374383 | 1.48E-08   | 9.70E-09 | 0.394978  | 1.81E-05    |
| phe.Fasting_rs80157533 | S8 | NEK1 | rs190559574S7  | DIAPH1        | 1.65E-12 | 6.74E-05    | 3.16E-09   | 1.25E-09 | 0.0510001 | 2.90E-06    |
| phe.Fasting_rs80157533 | S8 | NEK1 | rs191544043S8  | DIAPH1        | 9.17E-12 | 0.000374383 | 1.48E-08   | 9.70E-09 | 0.394978  | 1.81E-05    |
| phe.Fasting_rs80157533 | S8 | NEK1 | rs191766712S7  | DIAPH1        | 9.17E-12 | 0.000374383 | 1.48E-08   | 9.70E-09 | 0.394978  | 1.81E-05    |
| phe.Fasting_rs80157533 | S8 | NEK1 | rs192690040S7  | DIAPH1        | 9.17E-12 | 0.000374383 | 1.48E-08   | 9.70E-09 | 0.394978  | 1.81E-05    |
| phe.Fasting_rs80157533 | S8 | NEK1 | rs192765219S7  | DIAPH1        | 9.17E-12 | 0.000374383 | 1.48E-08   | 9.70E-09 | 0.394978  | 1.81E-05    |
| phe.Fasting_rs80157533 | S8 | NEK1 | rs192770525S7  | DIAPH1        | 9.17E-12 | 0.000374383 | 1.48E-08   | 9.70E-09 | 0.394978  | 1.81E-05    |
| phe.Fasting_rs80157533 | S8 | NEK1 | rs2924507 S5   | ZC3H3         | 3.60E-08 | 1           | 3.04E-05   | 6.78E-07 | 1         | 0.000791674 |
| phe.Fasting_rs80157533 | S8 | NEK1 | rs2924508 S8   | ZC3H3         | 3.60E-08 | 1           | 3.04E-05   | 9.52E-07 | 1         | 0.00108069  |
| phe.Fasting_rs80157533 | S8 | NEK1 | rs2924511 S7   | ZC3H3         | 3.60E-08 | 1           | 3.04E-05   | 5.76E-07 | 1         | 0.000680958 |
| phe.Fasting_rs80157533 | S8 | NEK1 | rs2924512 S7   | ZC3H3         | 4.02E-08 | 1           | 3.37E-05   | 7.17E-07 | 1         | 0.00083355  |
| phe.Fasting_rs80157533 | S8 | NEK1 | rs2956376 S8   | ZC3H3         | 3.60E-08 | 1           | 3.04E-05   | 3.89E-07 | 1         | 0.000476148 |
| phe.Fasting_rs80157533 | S8 | NEK1 | rs2980270 S7   | ZC3H3         | 3.60E-08 | 1           | 3.04E-05   | 3.89E-07 | 1         | 0.000476148 |
| phe.Fasting_rs80157533 | S8 | NEK1 | rs2980272 S7   | ZC3H3         | 4.02E-08 | 1           | 3.37E-05   | 7.52E-07 | 1         | 0.000869902 |
| phe.Fasting_rs80157533 | S8 | NEK1 | rs2980275 S5   | ZC3H3         | 3.60E-08 | 1           | 3.04E-05   | 6.78E-07 | 1         | 0.000791674 |
| phe.Fasting_rs80157533 | S8 | NEK1 | rs35990401 S7  | DIAPH1        | 8.40E-12 | 0.000343123 | 1.39E-08   | 3.62E-09 | 0.147164  | 7.50E-06    |
| phe.Fasting_rs80157533 | S8 | NEK1 | rs366767 S5    | ZC3H3         | 6.34E-08 | 1           | 5.08E-05   | 4.19E-07 | 1         | 0.000508745 |

|                        |     |           |             |     |             |          |             |             |          |           |             |
|------------------------|-----|-----------|-------------|-----|-------------|----------|-------------|-------------|----------|-----------|-------------|
| phe.Fasting_rs80157533 | S8  | NEK1      | rs55900860  | S7  | DIAPH1      | 1.65E-12 | 6.74E-05    | 3.16E-09    | 1.25E-09 | 0.0510001 | 2.90E-06    |
| phe.Fasting_rs80157533 | S8  | NEK1      | rs57503635  | S3  | NA          | 7.93E-17 | 3.24E-09    | 3.50E-13    | 1.02E-05 | 1         | 0.00831784  |
| phe.Fasting_rs80157533 | S8  | NEK1      | rs6881310   | S23 | ISL1        | 4.23E-17 | 1.73E-09    | 2.22E-13    | 8.72E-13 | 3.55E-05  | 4.15E-09    |
| phe.Fasting_rs80157533 | S8  | NEK1      | rs73619637  | S8  | NA          | 1.02E-16 | 4.15E-09    | 4.31E-13    | 6.10E-09 | 0.248478  | 1.19E-05    |
| phe.Fasting_rs80157533 | S8  | NEK1      | rs73794928  | S13 | "PCDHGA9,Pi | 1.55E-05 | 1           | 6.66E-03    | 1.19E-05 | 1         | 0.0093559   |
| phe.Fasting_rs80157533 | S8  | NEK1      | rs77444916  | S23 | LOC642366   | 1.50E-17 | 6.11E-10    | 1.18E-13    | 3.78E-16 | 1.54E-08  | 1.16E-11    |
| phe.Fasting_rs80157533 | S8  | NEK1      | rs78703708  | S7  | FAF2        | 9.25E-18 | 3.78E-10    | 9.24E-14    | 7.48E-08 | 1         | 0.000109374 |
| phe.Fasting_rs80157533 | S8  | NEK1      | rs79517926  | S15 | "DIAPH1,LOC | 2.69E-12 | 0.000109672 | 4.97E-09    | 8.36E-10 | 0.0340091 | 2.03E-06    |
| phe.Fasting_rs80157533 | S8  | NEK1      | rs80258830  | S24 | LOC642366   | 1.50E-17 | 6.11E-10    | 1.18E-13    | 3.78E-16 | 1.54E-08  | 1.16E-11    |
| phe.Fasting_rs80200953 | S8  | PPP2R5D   | rs114565620 | S8  | RCL1        | 4.47E-18 | 1.83E-10    | 6.40E-14    | 2.13E-16 | 8.68E-09  | 8.14E-12    |
| phe.Fasting_rs80200953 | S8  | PPP2R5D   | rs141926074 | S8  | ATE1        | 3.73E-18 | 1.52E-10    | 5.71E-14    | 4.95E-06 | 1         | 0.0045362   |
| phe.Fasting_rs80200953 | S8  | PPP2R5D   | rs57503635  | S3  | NA          | 5.94E-09 | 0.242589    | 5.76E-06    | 3.28E-07 | 1         | 0.000410707 |
| phe.Fasting_rs80200953 | S8  | PPP2R5D   | rs75350765  | S5  | RCL1        | 4.47E-18 | 1.83E-10    | 6.40E-14    | 2.13E-16 | 8.68E-09  | 8.14E-12    |
| phe.Fasting_rs80200953 | S8  | PPP2R5D   | rs79886603  | S15 | NA          | 5.01E-18 | 2.05E-10    | 6.85E-14    | 4.10E-09 | 0.166929  | 8.40E-06    |
| phe.Fasting_rs80258830 | S24 | LOC642366 | rs111576333 | S5  | TMEM64      | 3.76E-17 | 1.53E-09    | 2.04E-13    | 6.78E-15 | 2.76E-07  | 6.06E-11    |
| phe.Fasting_rs80258830 | S24 | LOC642366 | rs112027720 | S7  | DIAPH1      | 5.84E-06 | 1           | 2.86E-03    | 1.30E-13 | 5.29E-06  | 7.59E-10    |
| phe.Fasting_rs80258830 | S24 | LOC642366 | rs112089881 | S8  | ZFAND4      | 7.24E-08 | 1           | 5.70E-05    | 3.02E-16 | 1.23E-08  | 1.01E-11    |
| phe.Fasting_rs80258830 | S24 | LOC642366 | rs112091318 | S5  | TMEM64      | 1.13E-17 | 4.62E-10    | 1.02E-13    | 8.04E-15 | 3.27E-07  | 7.10E-11    |
| phe.Fasting_rs80258830 | S24 | LOC642366 | rs113219478 | S7  | DIAPH1      | 5.84E-06 | 1           | 2.86E-03    | 1.30E-13 | 5.29E-06  | 7.59E-10    |
| phe.Fasting_rs80258830 | S24 | LOC642366 | rs113568654 | S12 | SPTLC1      | 1.61E-07 | 1           | 1.17E-04    | 1.46E-13 | 5.95E-06  | 8.32E-10    |
| phe.Fasting_rs80258830 | S24 | LOC642366 | rs114334325 | S7  | AP3M2       | 1.30E-11 | 0.000530003 | 2.02E-08    | 4.93E-15 | 2.01E-07  | 4.56E-11    |
| phe.Fasting_rs80258830 | S24 | LOC642366 | rs114394395 | S7  | AP3M2       | 1.35E-11 | 0.00055115  | 2.09E-08    | 4.93E-15 | 2.01E-07  | 4.56E-11    |
| phe.Fasting_rs80258830 | S24 | LOC642366 | rs114565620 | S8  | RCL1        | 2.52E-17 | 1.03E-09    | 1.56E-13    | 5.48E-15 | 2.23E-07  | 5.01E-11    |
| phe.Fasting_rs80258830 | S24 | LOC642366 | rs115083290 | S19 | NA          | 1.64E-06 | 1           | 9.42E-04    | 8.45E-16 | 3.44E-08  | 1.16E-11    |
| phe.Fasting_rs80258830 | S24 | LOC642366 | rs115305957 | S23 | NA          | 1.48E-17 | 6.03E-10    | 1.17E-13    | 3.16E-15 | 1.29E-07  | 3.03E-11    |
| phe.Fasting_rs80258830 | S24 | LOC642366 | rs115752779 | S19 | NA          | 1.64E-06 | 1           | 9.42E-04    | 8.45E-16 | 3.44E-08  | 1.16E-11    |
| phe.Fasting_rs80258830 | S24 | LOC642366 | rs115787552 | S5  | KPNA3       | 2.72E-16 | 1.11E-08    | 9.14E-13    | 3.09E-14 | 1.26E-06  | 2.29E-10    |
| phe.Fasting_rs80258830 | S24 | LOC642366 | rs115888477 | S8  | NA          | 1.85E-15 | 7.54E-08    | 5.27E-12    | 5.33E-15 | 2.17E-07  | 4.88E-11    |
| phe.Fasting_rs80258830 | S24 | LOC642366 | rs116011837 | S9  | BRD2        | 2.31E-17 | 9.43E-10    | 1.46E-13    | 2.99E-13 | 1.22E-05  | 1.64E-09    |
| phe.Fasting_rs80258830 | S24 | LOC642366 | rs116079984 | S8  | KPNA3       | 2.72E-16 | 1.11E-08    | 9.14E-13    | 3.49E-14 | 1.42E-06  | 2.53E-10    |
| phe.Fasting_rs80258830 | S24 | LOC642366 | rs116120727 | S9  | BRD2        | 2.31E-17 | 9.43E-10    | 1.46E-13    | 2.99E-13 | 1.22E-05  | 1.64E-09    |
| phe.Fasting_rs80258830 | S24 | LOC642366 | rs116279995 | S20 | "PCDHGA4,Pi | 9.01E-07 | 1           | 0.000551882 | 5.24E-14 | 2.13E-06  | 3.61E-10    |
| phe.Fasting_rs80258830 | S24 | LOC642366 | rs116406581 | S2  | NA          | 5.35E-11 | 0.00218631  | 7.23E-08    | 3.94E-15 | 1.60E-07  | 3.70E-11    |
| phe.Fasting_rs80258830 | S24 | LOC642366 | rs116548615 | S8  | TMEM45B     | 1.98E-17 | 8.10E-10    | 1.42E-13    | 6.84E-09 | 0.278458  | 1.32E-05    |
| phe.Fasting_rs80258830 | S24 | LOC642366 | rs116696844 | S3  | AP3M2       | 1.83E-11 | 0.000748556 | 2.76E-08    | 4.93E-15 | 2.01E-07  | 4.56E-11    |
| phe.Fasting_rs80258830 | S24 | LOC642366 | rs11989304  | S4  | TMEM64      | 3.76E-17 | 1.53E-09    | 2.04E-13    | 6.48E-15 | 2.64E-07  | 5.85E-11    |
| phe.Fasting_rs80258830 | S24 | LOC642366 | rs13353823  | S8  | MAST4       | 3.13E-07 | 1           | 2.16E-04    | 6.70E-09 | 0.272905  | 1.30E-05    |
| phe.Fasting_rs80258830 | S24 | LOC642366 | rs138090701 | S5  | HDAC3       | 9.19E-07 | 1           | 5.62E-04    | 1.17E-13 | 4.75E-06  | 7.06E-10    |
| phe.Fasting_rs80258830 | S24 | LOC642366 | rs138136869 | S7  | DIAPH1      | 1.45E-06 | 1           | 8.46E-04    | 3.46E-14 | 1.41E-06  | 2.51E-10    |
| phe.Fasting_rs80258830 | S24 | LOC642366 | rs138457103 | S10 | DIAPH1      | 3.55E-06 | 1           | 0.00183746  | 1.24E-13 | 5.06E-06  | 7.37E-10    |

|              |            |     |           |             |     |             |          |          |             |          |          |          |
|--------------|------------|-----|-----------|-------------|-----|-------------|----------|----------|-------------|----------|----------|----------|
| phe.Fasting_ | rs80258830 | S24 | LOC642366 | rs138487229 | S11 | DIAPH1      | 5.84E-06 | 1        | 2.86E-03    | 1.30E-13 | 5.29E-06 | 7.59E-10 |
| phe.Fasting_ | rs80258830 | S24 | LOC642366 | rs138738950 | S8  | "PCDHGB2,Pi | 5.84E-06 | 1        | 2.86E-03    | 1.32E-13 | 5.37E-06 | 7.69E-10 |
| phe.Fasting_ | rs80258830 | S24 | LOC642366 | rs139297927 | S8  | DIAPH1      | 5.84E-06 | 1        | 2.86E-03    | 1.30E-13 | 5.29E-06 | 7.59E-10 |
| phe.Fasting_ | rs80258830 | S24 | LOC642366 | rs139337303 | S8  | DIAPH1      | 5.84E-06 | 1        | 2.86E-03    | 1.30E-13 | 5.29E-06 | 7.59E-10 |
| phe.Fasting_ | rs80258830 | S24 | LOC642366 | rs139403963 | S8  | DIAPH1      | 1.45E-06 | 1        | 8.46E-04    | 3.46E-14 | 1.41E-06 | 2.51E-10 |
| phe.Fasting_ | rs80258830 | S24 | LOC642366 | rs139621309 | S18 | "LOC1005056 | 5.84E-06 | 1        | 2.86E-03    | 1.30E-13 | 5.29E-06 | 7.59E-10 |
| phe.Fasting_ | rs80258830 | S24 | LOC642366 | rs139828110 | S8  | DIAPH1      | 1.45E-06 | 1        | 8.46E-04    | 3.46E-14 | 1.41E-06 | 2.51E-10 |
| phe.Fasting_ | rs80258830 | S24 | LOC642366 | rs140070363 | S8  | DIAPH1      | 5.84E-06 | 1        | 2.86E-03    | 1.30E-13 | 5.29E-06 | 7.59E-10 |
| phe.Fasting_ | rs80258830 | S24 | LOC642366 | rs140524622 | S7  | MRPL10      | 3.60E-07 | 1        | 2.45E-04    | 5.76E-15 | 2.34E-07 | 5.25E-11 |
| phe.Fasting_ | rs80258830 | S24 | LOC642366 | rs140644750 | S13 | DIAPH1      | 5.84E-06 | 1        | 2.86E-03    | 1.30E-13 | 5.29E-06 | 7.59E-10 |
| phe.Fasting_ | rs80258830 | S24 | LOC642366 | rs141022544 | S8  | DIAPH1      | 5.84E-06 | 1        | 2.86E-03    | 1.30E-13 | 5.29E-06 | 7.59E-10 |
| phe.Fasting_ | rs80258830 | S24 | LOC642366 | rs141525984 | S5  | DIAPH1      | 5.84E-06 | 1        | 2.86E-03    | 1.30E-13 | 5.29E-06 | 7.59E-10 |
| phe.Fasting_ | rs80258830 | S24 | LOC642366 | rs141692339 | S3  | "PCDHGA6,Pi | 1.11E-06 | 1        | 6.65E-04    | 7.18E-14 | 2.92E-06 | 4.82E-10 |
| phe.Fasting_ | rs80258830 | S24 | LOC642366 | rs141926074 | S8  | ATE1        | 5.64E-18 | 2.30E-10 | 7.14E-14    | 8.39E-14 | 3.41E-06 | 5.61E-10 |
| phe.Fasting_ | rs80258830 | S24 | LOC642366 | rs142480565 | S8  | DIAPH1      | 5.84E-06 | 1        | 2.86E-03    | 1.30E-13 | 5.29E-06 | 7.59E-10 |
| phe.Fasting_ | rs80258830 | S24 | LOC642366 | rs142718558 | S7  | "DIAPH1,LOC | 5.84E-06 | 1        | 2.86E-03    | 1.30E-13 | 5.29E-06 | 7.59E-10 |
| phe.Fasting_ | rs80258830 | S24 | LOC642366 | rs142789100 | S8  | DIAPH1      | 1.45E-06 | 1        | 8.46E-04    | 3.46E-14 | 1.41E-06 | 2.51E-10 |
| phe.Fasting_ | rs80258830 | S24 | LOC642366 | rs142812798 | S7  | DIAPH1      | 1.45E-06 | 1        | 8.46E-04    | 3.46E-14 | 1.41E-06 | 2.51E-10 |
| phe.Fasting_ | rs80258830 | S24 | LOC642366 | rs143377827 | S13 | "DIAPH1,LOC | 1.51E-06 | 1        | 8.78E-04    | 2.83E-14 | 1.15E-06 | 2.13E-10 |
| phe.Fasting_ | rs80258830 | S24 | LOC642366 | rs143691978 | S11 | DIAPH1      | 1.45E-06 | 1        | 8.46E-04    | 3.80E-14 | 1.55E-06 | 2.72E-10 |
| phe.Fasting_ | rs80258830 | S24 | LOC642366 | rs144081334 | S11 | DIAPH1      | 1.45E-06 | 1        | 8.46E-04    | 3.80E-14 | 1.55E-06 | 2.72E-10 |
| phe.Fasting_ | rs80258830 | S24 | LOC642366 | rs144613910 | S8  | DIAPH1      | 5.84E-06 | 1        | 0.0028563   | 1.30E-13 | 5.29E-06 | 7.59E-10 |
| phe.Fasting_ | rs80258830 | S24 | LOC642366 | rs145027704 | S11 | DIAPH1      | 1.45E-06 | 1        | 0.000846158 | 3.80E-14 | 1.55E-06 | 2.72E-10 |
| phe.Fasting_ | rs80258830 | S24 | LOC642366 | rs146220673 | S7  | DIAPH1      | 5.84E-06 | 1        | 2.86E-03    | 1.30E-13 | 5.29E-06 | 7.59E-10 |
| phe.Fasting_ | rs80258830 | S24 | LOC642366 | rs146622060 | S13 | DIAPH1      | 1.45E-06 | 1        | 0.000846158 | 3.80E-14 | 1.55E-06 | 2.72E-10 |
| phe.Fasting_ | rs80258830 | S24 | LOC642366 | rs146815317 | S5  | KPNA3       | 2.72E-16 | 1.11E-08 | 9.14E-13    | 3.09E-14 | 1.26E-06 | 2.29E-10 |
| phe.Fasting_ | rs80258830 | S24 | LOC642366 | rs146878162 | S7  | DIAPH1      | 5.84E-06 | 1        | 0.0028563   | 1.30E-13 | 5.29E-06 | 7.59E-10 |
| phe.Fasting_ | rs80258830 | S24 | LOC642366 | rs1470889   | S5  | ZC3H3       | 3.47E-18 | 1.42E-10 | 5.60E-14    | 2.19E-13 | 8.93E-06 | 1.21E-09 |
| phe.Fasting_ | rs80258830 | S24 | LOC642366 | rs1470890   | S5  | ZC3H3       | 3.47E-18 | 1.42E-10 | 5.60E-14    | 2.19E-13 | 8.93E-06 | 1.21E-09 |
| phe.Fasting_ | rs80258830 | S24 | LOC642366 | rs147314451 | S8  | DIAPH1      | 5.84E-06 | 1        | 0.0028563   | 1.30E-13 | 5.29E-06 | 7.59E-10 |
| phe.Fasting_ | rs80258830 | S24 | LOC642366 | rs147417996 | S7  | DIAPH1      | 1.45E-06 | 1        | 8.46E-04    | 3.80E-14 | 1.55E-06 | 2.72E-10 |
| phe.Fasting_ | rs80258830 | S24 | LOC642366 | rs147506725 | S21 | "PCDHGA1,Pi | 9.01E-07 | 1        | 5.52E-04    | 5.24E-14 | 2.13E-06 | 3.61E-10 |
| phe.Fasting_ | rs80258830 | S24 | LOC642366 | rs147646948 | S7  | "LOC1005056 | 5.84E-06 | 1        | 2.86E-03    | 1.30E-13 | 5.29E-06 | 7.59E-10 |
| phe.Fasting_ | rs80258830 | S24 | LOC642366 | rs147677041 | S8  | DIAPH1      | 1.45E-06 | 1        | 8.46E-04    | 3.46E-14 | 1.41E-06 | 2.51E-10 |
| phe.Fasting_ | rs80258830 | S24 | LOC642366 | rs148116628 | S7  | DIAPH1      | 5.84E-06 | 1        | 2.86E-03    | 1.30E-13 | 5.29E-06 | 7.59E-10 |
| phe.Fasting_ | rs80258830 | S24 | LOC642366 | rs148423011 | S7  | DIAPH1      | 5.84E-06 | 1        | 2.86E-03    | 1.30E-13 | 5.29E-06 | 7.59E-10 |
| phe.Fasting_ | rs80258830 | S24 | LOC642366 | rs149019627 | S8  | DIAPH1      | 1.45E-06 | 1        | 8.46E-04    | 3.46E-14 | 1.41E-06 | 2.51E-10 |
| phe.Fasting_ | rs80258830 | S24 | LOC642366 | rs149075406 | S8  | DIAPH1      | 5.84E-06 | 1        | 2.86E-03    | 1.30E-13 | 5.29E-06 | 7.59E-10 |
| phe.Fasting_ | rs80258830 | S24 | LOC642366 | rs149334783 | S8  | DIAPH1      | 5.84E-06 | 1        | 2.86E-03    | 1.30E-13 | 5.29E-06 | 7.59E-10 |
| phe.Fasting_ | rs80258830 | S24 | LOC642366 | rs149553852 | S21 | "PCDHGA10,  | 9.01E-07 | 1        | 5.52E-04    | 5.24E-14 | 2.13E-06 | 3.61E-10 |

|              |            |     |           |             |     |             |          |          |             |          |          |          |
|--------------|------------|-----|-----------|-------------|-----|-------------|----------|----------|-------------|----------|----------|----------|
| phe.Fasting_ | rs80258830 | S24 | LOC642366 | rs149716949 | S5  | DIAPH1      | 8.44E-07 | 1        | 5.20E-04    | 1.62E-14 | 6.60E-07 | 1.36E-10 |
| phe.Fasting_ | rs80258830 | S24 | LOC642366 | rs149791570 | S5  | DIAPH1      | 1.45E-06 | 1        | 8.46E-04    | 3.46E-14 | 1.41E-06 | 2.51E-10 |
| phe.Fasting_ | rs80258830 | S24 | LOC642366 | rs150117838 | S8  | KPNA3       | 2.72E-16 | 1.11E-08 | 9.14E-13    | 2.88E-14 | 1.17E-06 | 2.16E-10 |
| phe.Fasting_ | rs80258830 | S24 | LOC642366 | rs150452206 | S13 | "DIAPH1,LOC | 5.84E-06 | 1        | 2.86E-03    | 1.30E-13 | 5.29E-06 | 7.59E-10 |
| phe.Fasting_ | rs80258830 | S24 | LOC642366 | rs150675915 | S7  | DIAPH1      | 5.84E-06 | 1        | 2.86E-03    | 1.30E-13 | 5.29E-06 | 7.59E-10 |
| phe.Fasting_ | rs80258830 | S24 | LOC642366 | rs150765570 | S7  | DIAPH1      | 5.84E-06 | 1        | 2.86E-03    | 1.30E-13 | 5.29E-06 | 7.59E-10 |
| phe.Fasting_ | rs80258830 | S24 | LOC642366 | rs150916187 | S4  | HIST1H2BK   | 5.42E-07 | 1        | 3.53E-04    | 6.03E-15 | 2.45E-07 | 5.47E-11 |
| phe.Fasting_ | rs80258830 | S24 | LOC642366 | rs150992994 | S11 | "PCDHGA5,PI | 5.86E-06 | 1        | 2.86E-03    | 1.24E-13 | 5.04E-06 | 7.34E-10 |
| phe.Fasting_ | rs80258830 | S24 | LOC642366 | rs151204700 | S8  | DIAPH1      | 5.84E-06 | 1        | 2.86E-03    | 1.30E-13 | 5.29E-06 | 7.59E-10 |
| phe.Fasting_ | rs80258830 | S24 | LOC642366 | rs151330468 | S8  | DIAPH1      | 1.45E-06 | 1        | 8.46E-04    | 3.80E-14 | 1.55E-06 | 2.72E-10 |
| phe.Fasting_ | rs80258830 | S24 | LOC642366 | rs16894241  | S4  | HIST1H2BK   | 9.23E-07 | 1        | 5.64E-04    | 1.00E-14 | 4.07E-07 | 8.68E-11 |
| phe.Fasting_ | rs80258830 | S24 | LOC642366 | rs16908547  | S8  | PAG1        | 2.76E-08 | 1        | 2.39E-05    | 4.30E-13 | 1.75E-05 | 2.31E-09 |
| phe.Fasting_ | rs80258830 | S24 | LOC642366 | rs17494290  | S5  | CDH2        | 3.23E-19 | 1.32E-11 | 2.40E-14    | 2.27E-12 | 9.24E-05 | 9.79E-09 |
| phe.Fasting_ | rs80258830 | S24 | LOC642366 | rs180772028 | S8  | "DIAPH1,LOC | 5.84E-06 | 1        | 2.86E-03    | 1.30E-13 | 5.29E-06 | 7.59E-10 |
| phe.Fasting_ | rs80258830 | S24 | LOC642366 | rs181224861 | S7  | DIAPH1      | 5.84E-06 | 1        | 2.86E-03    | 1.30E-13 | 5.29E-06 | 7.59E-10 |
| phe.Fasting_ | rs80258830 | S24 | LOC642366 | rs181247960 | S21 | "PCDHGA9,PI | 9.01E-07 | 1        | 5.52E-04    | 5.24E-14 | 2.13E-06 | 3.61E-10 |
| phe.Fasting_ | rs80258830 | S24 | LOC642366 | rs181824655 | S21 | "PCDHGB6,PI | 9.01E-07 | 1        | 5.52E-04    | 5.24E-14 | 2.13E-06 | 3.61E-10 |
| phe.Fasting_ | rs80258830 | S24 | LOC642366 | rs182714699 | S8  | DIAPH1      | 5.84E-06 | 1        | 2.86E-03    | 1.30E-13 | 5.29E-06 | 7.59E-10 |
| phe.Fasting_ | rs80258830 | S24 | LOC642366 | rs182958142 | S8  | DIAPH1      | 3.46E-06 | 1        | 1.80E-03    | 1.26E-14 | 5.14E-07 | 1.08E-10 |
| phe.Fasting_ | rs80258830 | S24 | LOC642366 | rs182965141 | S8  | DIAPH1      | 1.58E-06 | 1        | 9.11E-04    | 8.86E-15 | 3.61E-07 | 7.78E-11 |
| phe.Fasting_ | rs80258830 | S24 | LOC642366 | rs183597049 | S7  | DIAPH1      | 5.84E-06 | 1        | 2.86E-03    | 1.30E-13 | 5.29E-06 | 7.59E-10 |
| phe.Fasting_ | rs80258830 | S24 | LOC642366 | rs183980988 | S2  | NA          | 5.84E-06 | 1        | 2.86E-03    | 1.30E-13 | 5.29E-06 | 7.59E-10 |
| phe.Fasting_ | rs80258830 | S24 | LOC642366 | rs184233232 | S7  | DIAPH1      | 5.84E-06 | 1        | 0.0028563   | 1.30E-13 | 5.29E-06 | 7.59E-10 |
| phe.Fasting_ | rs80258830 | S24 | LOC642366 | rs184509477 | S13 | "PCDHGB4,PI | 5.84E-06 | 1        | 2.86E-03    | 1.30E-13 | 5.29E-06 | 7.59E-10 |
| phe.Fasting_ | rs80258830 | S24 | LOC642366 | rs185069296 | S15 | "LOC1005056 | 5.84E-06 | 1        | 2.86E-03    | 1.30E-13 | 5.29E-06 | 7.59E-10 |
| phe.Fasting_ | rs80258830 | S24 | LOC642366 | rs185502834 | S8  | DIAPH1      | 1.45E-06 | 1        | 8.46E-04    | 3.46E-14 | 1.41E-06 | 2.51E-10 |
| phe.Fasting_ | rs80258830 | S24 | LOC642366 | rs185759881 | S7  | DIAPH1      | 5.84E-06 | 1        | 2.86E-03    | 1.30E-13 | 5.29E-06 | 7.59E-10 |
| phe.Fasting_ | rs80258830 | S24 | LOC642366 | rs186288044 | S21 | "PCDHGB4,PI | 9.01E-07 | 1        | 5.52E-04    | 5.24E-14 | 2.13E-06 | 3.61E-10 |
| phe.Fasting_ | rs80258830 | S24 | LOC642366 | rs187000011 | S11 | DIAPH1      | 5.84E-06 | 1        | 2.86E-03    | 1.30E-13 | 5.29E-06 | 7.59E-10 |
| phe.Fasting_ | rs80258830 | S24 | LOC642366 | rs188981295 | S5  | "RPS27AP10, | 5.84E-06 | 1        | 2.86E-03    | 1.30E-13 | 5.29E-06 | 7.59E-10 |
| phe.Fasting_ | rs80258830 | S24 | LOC642366 | rs190559574 | S7  | DIAPH1      | 1.45E-06 | 1        | 0.000846158 | 3.46E-14 | 1.41E-06 | 2.51E-10 |
| phe.Fasting_ | rs80258830 | S24 | LOC642366 | rs191544043 | S8  | DIAPH1      | 5.84E-06 | 1        | 2.86E-03    | 1.30E-13 | 5.29E-06 | 7.59E-10 |
| phe.Fasting_ | rs80258830 | S24 | LOC642366 | rs191766712 | S7  | DIAPH1      | 5.84E-06 | 1        | 2.86E-03    | 1.30E-13 | 5.29E-06 | 7.59E-10 |
| phe.Fasting_ | rs80258830 | S24 | LOC642366 | rs192690040 | S7  | DIAPH1      | 5.84E-06 | 1        | 2.86E-03    | 1.30E-13 | 5.29E-06 | 7.59E-10 |
| phe.Fasting_ | rs80258830 | S24 | LOC642366 | rs192765219 | S7  | DIAPH1      | 5.84E-06 | 1        | 2.86E-03    | 1.30E-13 | 5.29E-06 | 7.59E-10 |
| phe.Fasting_ | rs80258830 | S24 | LOC642366 | rs192770525 | S7  | DIAPH1      | 5.84E-06 | 1        | 2.86E-03    | 1.30E-13 | 5.29E-06 | 7.59E-10 |
| phe.Fasting_ | rs80258830 | S24 | LOC642366 | rs2285645   | S7  | MTMR3       | 1.76E-07 | 1        | 1.27E-04    | 4.87E-14 | 1.98E-06 | 3.37E-10 |
| phe.Fasting_ | rs80258830 | S24 | LOC642366 | rs2924507   | S5  | ZC3H3       | 3.47E-18 | 1.42E-10 | 5.60E-14    | 2.19E-13 | 8.93E-06 | 1.21E-09 |
| phe.Fasting_ | rs80258830 | S24 | LOC642366 | rs2924508   | S8  | ZC3H3       | 3.47E-18 | 1.42E-10 | 5.60E-14    | 3.11E-13 | 1.27E-05 | 1.70E-09 |
| phe.Fasting_ | rs80258830 | S24 | LOC642366 | rs2924511   | S7  | ZC3H3       | 3.47E-18 | 1.42E-10 | 5.60E-14    | 1.97E-13 | 8.01E-06 | 1.10E-09 |

|                        |     |           |            |     |             |          |             |          |          |             |            |
|------------------------|-----|-----------|------------|-----|-------------|----------|-------------|----------|----------|-------------|------------|
| phe.Fasting_rs80258830 | S24 | LOC642366 | rs2924512  | S7  | ZC3H3       | 3.97E-18 | 1.62E-10    | 5.99E-14 | 2.29E-13 | 9.30E-06    | 1.26E-09   |
| phe.Fasting_rs80258830 | S24 | LOC642366 | rs2956376  | S8  | ZC3H3       | 3.47E-18 | 1.42E-10    | 5.60E-14 | 1.33E-13 | 5.43E-06    | 7.77E-10   |
| phe.Fasting_rs80258830 | S24 | LOC642366 | rs2980270  | S7  | ZC3H3       | 3.47E-18 | 1.42E-10    | 5.60E-14 | 1.33E-13 | 5.43E-06    | 7.77E-10   |
| phe.Fasting_rs80258830 | S24 | LOC642366 | rs2980272  | S7  | ZC3H3       | 3.97E-18 | 1.62E-10    | 5.99E-14 | 2.52E-13 | 1.03E-05    | 1.39E-09   |
| phe.Fasting_rs80258830 | S24 | LOC642366 | rs2980275  | S5  | ZC3H3       | 3.47E-18 | 1.42E-10    | 5.60E-14 | 2.19E-13 | 8.93E-06    | 1.21E-09   |
| phe.Fasting_rs80258830 | S24 | LOC642366 | rs34801978 | S3  | HOXB2       | 1.05E-06 | 1           | 6.34E-04 | 4.42E-09 | 0.179891    | 8.98E-06   |
| phe.Fasting_rs80258830 | S24 | LOC642366 | rs35990401 | S7  | DIAPH1      | 4.98E-06 | 1           | 2.48E-03 | 5.10E-14 | 2.08E-06    | 3.52E-10   |
| phe.Fasting_rs80258830 | S24 | LOC642366 | rs366767   | S5  | ZC3H3       | 4.74E-18 | 1.93E-10    | 6.62E-14 | 1.49E-13 | 6.06E-06    | 8.45E-10   |
| phe.Fasting_rs80258830 | S24 | LOC642366 | rs4732511  | S13 | POR         | 1.38E-18 | 5.65E-11    | 3.39E-14 | 2.18E-06 | 1           | 0.00223348 |
| phe.Fasting_rs80258830 | S24 | LOC642366 | rs55900860 | S7  | DIAPH1      | 1.45E-06 | 1           | 8.46E-04 | 3.46E-14 | 1.41E-06    | 2.51E-10   |
| phe.Fasting_rs80258830 | S24 | LOC642366 | rs57503635 | S3  | NA          | 8.73E-17 | 3.57E-09    | 3.79E-13 | 1.25E-14 | 5.07E-07    | 1.07E-10   |
| phe.Fasting_rs80258830 | S24 | LOC642366 | rs60011869 | S16 | NA          | 9.65E-07 | 1           | 5.87E-04 | 5.08E-15 | 2.07E-07    | 4.68E-11   |
| phe.Fasting_rs80258830 | S24 | LOC642366 | rs6964407  | S7  | POR         | 4.32E-18 | 1.76E-10    | 6.34E-14 | 2.04E-06 | 1           | 0.00210857 |
| phe.Fasting_rs80258830 | S24 | LOC642366 | rs7004597  | S8  | NA          | 1.30E-11 | 0.000530003 | 2.02E-08 | 3.39E-15 | 1.38E-07    | 3.24E-11   |
| phe.Fasting_rs80258830 | S24 | LOC642366 | rs7256517  | S7  | CYTH2       | 1.01E-16 | 4.11E-09    | 4.28E-13 | 8.71E-15 | 3.55E-07    | 7.66E-11   |
| phe.Fasting_rs80258830 | S24 | LOC642366 | rs73283603 | S7  | ZWINT       | 9.84E-17 | 4.02E-09    | 4.21E-13 | 5.66E-15 | 2.30E-07    | 5.16E-11   |
| phe.Fasting_rs80258830 | S24 | LOC642366 | rs73392640 | S8  | POLR3B      | 1.50E-16 | 6.14E-09    | 5.83E-13 | 9.36E-12 | 0.000380943 | 3.49E-08   |
| phe.Fasting_rs80258830 | S24 | LOC642366 | rs73619637 | S8  | NA          | 9.04E-06 | 1           | 4.19E-03 | 5.49E-16 | 2.24E-08    | 1.16E-11   |
| phe.Fasting_rs80258830 | S24 | LOC642366 | rs73794928 | S13 | "PCDHGA9,Pi | 1.41E-06 | 1.00E+00    | 8.26E-04 | 2.53E-14 | 1.03E-06    | 1.92E-10   |
| phe.Fasting_rs80258830 | S24 | LOC642366 | rs74627895 | S8  | TMEM64      | 1.13E-17 | 4.62E-10    | 1.02E-13 | 3.94E-15 | 1.60E-07    | 3.70E-11   |
| phe.Fasting_rs80258830 | S24 | LOC642366 | rs74701059 | S24 | C17orf102   | 1.50E-17 | 6.14E-10    | 1.18E-13 | 3.22E-15 | 1.31E-07    | 3.09E-11   |
| phe.Fasting_rs80258830 | S24 | LOC642366 | rs74914207 | S24 | NA          | 3.46E-12 | 0.000141389 | 6.28E-09 | 1.58E-11 | 0.000644651 | 5.68E-08   |
| phe.Fasting_rs80258830 | S24 | LOC642366 | rs75350765 | S5  | RCL1        | 2.52E-17 | 1.03E-09    | 1.56E-13 | 5.48E-15 | 2.23E-07    | 5.01E-11   |
| phe.Fasting_rs80258830 | S24 | LOC642366 | rs75374128 | S5  | CNTLN       | 1.14E-17 | 4.66E-10    | 1.02E-13 | 8.56E-11 | 0.00348551  | 2.64E-07   |
| phe.Fasting_rs80258830 | S24 | LOC642366 | rs75758702 | S24 | NA          | 5.36E-18 | 2.19E-10    | 7.01E-14 | 1.92E-16 | 7.80E-09    | 7.61E-12   |
| phe.Fasting_rs80258830 | S24 | LOC642366 | rs75864203 | S8  | CNTLN       | 1.14E-17 | 4.66E-10    | 1.02E-13 | 8.56E-11 | 0.00348551  | 2.64E-07   |
| phe.Fasting_rs80258830 | S24 | LOC642366 | rs75949566 | S5  | TMEM64      | 3.79E-17 | 1.55E-09    | 2.05E-13 | 9.41E-15 | 3.83E-07    | 8.18E-11   |
| phe.Fasting_rs80258830 | S24 | LOC642366 | rs76844308 | S8  | CNTLN       | 7.43E-07 | 1           | 4.66E-04 | 2.85E-15 | 1.16E-07    | 2.76E-11   |
| phe.Fasting_rs80258830 | S24 | LOC642366 | rs7763107  | S8  | FARS2       | 6.68E-17 | 2.73E-09    | 3.05E-13 | 1.29E-15 | 5.24E-08    | 1.46E-11   |
| phe.Fasting_rs80258830 | S24 | LOC642366 | rs77798597 | S7  | KPNA3       | 2.72E-16 | 1.11E-08    | 9.14E-13 | 2.88E-14 | 1.17E-06    | 2.16E-10   |
| phe.Fasting_rs80258830 | S24 | LOC642366 | rs77845645 | S21 | NA          | 1.59E-17 | 6.50E-10    | 1.22E-13 | 1.19E-14 | 4.85E-07    | 1.02E-10   |
| phe.Fasting_rs80258830 | S24 | LOC642366 | rs78353402 | S8  | AP3M2       | 1.30E-11 | 0.000530003 | 2.02E-08 | 4.93E-15 | 2.01E-07    | 4.56E-11   |
| phe.Fasting_rs80258830 | S24 | LOC642366 | rs78516788 | S8  | SLC38A1     | 1.33E-17 | 5.43E-10    | 1.10E-13 | 1.01E-14 | 4.10E-07    | 8.74E-11   |
| phe.Fasting_rs80258830 | S24 | LOC642366 | rs78697063 | S5  | MSI2        | 5.49E-20 | 2.24E-12    | 2.23E-14 | 3.16E-15 | 1.28E-07    | 3.03E-11   |
| phe.Fasting_rs80258830 | S24 | LOC642366 | rs78722272 | S5  | CNTLN       | 1.14E-17 | 4.66E-10    | 1.02E-13 | 8.46E-11 | 0.00344297  | 2.62E-07   |
| phe.Fasting_rs80258830 | S24 | LOC642366 | rs78736524 | S5  | KPNA3       | 2.72E-16 | 1.11E-08    | 9.14E-13 | 3.09E-14 | 1.26E-06    | 2.29E-10   |
| phe.Fasting_rs80258830 | S24 | LOC642366 | rs78990344 | S2  | LOC10050631 | 3.76E-17 | 1.53E-09    | 2.04E-13 | 6.48E-15 | 2.64E-07    | 5.85E-11   |
| phe.Fasting_rs80258830 | S24 | LOC642366 | rs79517926 | S15 | "DIAPH1,LOC | 1.35E-06 | 1           | 7.94E-04 | 5.85E-15 | 2.38E-07    | 5.33E-11   |
| phe.Fasting_rs80258830 | S24 | LOC642366 | rs79703349 | S24 | C17orf102   | 1.50E-17 | 6.14E-10    | 1.18E-13 | 3.66E-15 | 1.49E-07    | 3.48E-11   |
| phe.Fasting_rs80258830 | S24 | LOC642366 | rs79781495 | S8  | KPNA3       | 2.72E-16 | 1.11E-08    | 9.14E-13 | 2.88E-14 | 1.17E-06    | 2.16E-10   |

|                        |     |           |             |     |               |          |          |             |          |          |             |
|------------------------|-----|-----------|-------------|-----|---------------|----------|----------|-------------|----------|----------|-------------|
| phe.Fasting_rs80258830 | S24 | LOC642366 | rs79886603  | S15 | NA            | 3.52E-07 | 1        | 2.40E-04    | 3.62E-15 | 1.47E-07 | 3.45E-11    |
| phe.Fasting_rs80258830 | S24 | LOC642366 | rs80332465  | S5  | KPNA3         | 2.95E-16 | 1.21E-08 | 9.83E-13    | 3.02E-14 | 1.23E-06 | 2.25E-10    |
| phe.Fasting_rs80258830 | S24 | LOC642366 | rs80334773  | S5  | KPNA3         | 2.95E-16 | 1.21E-08 | 9.83E-13    | 3.02E-14 | 1.23E-06 | 2.25E-10    |
| phe.Fasting_rs80258830 | S24 | LOC642366 | rs8075478   | S8  | MYH10         | 4.86E-07 | 1        | 3.20E-04    | 1.26E-15 | 5.14E-08 | 1.43E-11    |
| phe.Fasting_rs80258830 | S24 | LOC642366 | rs9620939   | S7  | MTMR3         | 1.86E-07 | 1        | 0.000133405 | 9.79E-17 | 3.98E-09 | 5.51E-12    |
| phe.Fasting_rs80258830 | S24 | LOC642366 | rs9625903   | S7  | MTMR3         | 2.09E-07 | 1        | 1.48E-04    | 3.64E-17 | 1.48E-09 | 3.17E-12    |
| phe.Fasting_rs80332465 | S5  | KPNA3     | rs140524622 | S7  | MRPL10        | 3.87E-08 | 1        | 3.25E-05    | 1.63E-16 | 6.63E-09 | 6.93E-12    |
| phe.Fasting_rs80332465 | S5  | KPNA3     | rs57503635  | S3  | NA            | 1.37E-15 | 5.60E-08 | 3.96E-12    | 4.42E-15 | 1.80E-07 | 4.10E-11    |
| phe.Fasting_rs80332465 | S5  | KPNA3     | rs7256517   | S7  | CYTH2         | 1.78E-05 | 1        | 0.00752173  | 1.51E-06 | 1        | 0.00162234  |
| phe.Fasting_rs80332465 | S5  | KPNA3     | rs75506779  | S5  | TMCO3         | 2.51E-06 | 1        | 0.00136249  | 2.58E-15 | 1.05E-07 | 2.52E-11    |
| phe.Fasting_rs80334773 | S5  | KPNA3     | rs140524622 | S7  | MRPL10        | 3.87E-08 | 1        | 3.25E-05    | 1.63E-16 | 6.63E-09 | 6.93E-12    |
| phe.Fasting_rs80334773 | S5  | KPNA3     | rs57503635  | S3  | NA            | 1.37E-15 | 5.60E-08 | 3.96E-12    | 4.42E-15 | 1.80E-07 | 4.10E-11    |
| phe.Fasting_rs80334773 | S5  | KPNA3     | rs7256517   | S7  | CYTH2         | 1.78E-05 | 1        | 0.00752173  | 1.51E-06 | 1        | 0.00162234  |
| phe.Fasting_rs80334773 | S5  | KPNA3     | rs75506779  | S5  | TMCO3         | 2.51E-06 | 1        | 0.00136249  | 2.58E-15 | 1.05E-07 | 2.52E-11    |
| phe.Fasting_rs8179686  | S5  | LIMS1     | rs112027720 | S7  | DIAPH1        | 2.31E-07 | 1        | 0.000162396 | 2.14E-08 | 0.870696 | 3.65E-05    |
| phe.Fasting_rs8179686  | S5  | LIMS1     | rs112940854 | S5  | MYO1B         | 2.05E-05 | 1        | 0.00854508  | 2.51E-09 | 0.102221 | 5.41E-06    |
| phe.Fasting_rs8179686  | S5  | LIMS1     | rs113219478 | S7  | DIAPH1        | 2.31E-07 | 1        | 0.000162396 | 2.14E-08 | 0.870696 | 3.65E-05    |
| phe.Fasting_rs8179686  | S5  | LIMS1     | rs115888477 | S8  | NA            | 8.57E-07 | 1        | 5.28E-04    | 4.79E-06 | 1        | 0.0044182   |
| phe.Fasting_rs8179686  | S5  | LIMS1     | rs138090701 | S5  | HDAC3         | 2.51E-07 | 1        | 0.000175323 | 3.95E-08 | 1        | 6.19E-05    |
| phe.Fasting_rs8179686  | S5  | LIMS1     | rs138136869 | S7  | DIAPH1        | 4.51E-08 | 1        | 3.73E-05    | 1.81E-08 | 0.736014 | 3.14E-05    |
| phe.Fasting_rs8179686  | S5  | LIMS1     | rs138457103 | S10 | DIAPH1        | 4.12E-06 | 1        | 0.0020983   | 3.53E-07 | 1        | 0.000438876 |
| phe.Fasting_rs8179686  | S5  | LIMS1     | rs138487229 | S11 | DIAPH1        | 2.31E-07 | 1        | 0.000162396 | 2.14E-08 | 0.870696 | 3.65E-05    |
| phe.Fasting_rs8179686  | S5  | LIMS1     | rs138738950 | S8  | "PCDHGB2,PI   | 2.31E-07 | 1        | 0.000162396 | 2.14E-08 | 0.871187 | 3.65E-05    |
| phe.Fasting_rs8179686  | S5  | LIMS1     | rs139297927 | S8  | DIAPH1        | 2.31E-07 | 1        | 0.000162396 | 2.14E-08 | 0.870696 | 3.65E-05    |
| phe.Fasting_rs8179686  | S5  | LIMS1     | rs139337303 | S8  | DIAPH1        | 2.31E-07 | 1        | 0.000162396 | 2.14E-08 | 0.870696 | 3.65E-05    |
| phe.Fasting_rs8179686  | S5  | LIMS1     | rs139403963 | S8  | DIAPH1        | 4.51E-08 | 1        | 3.73E-05    | 1.81E-08 | 0.736014 | 3.14E-05    |
| phe.Fasting_rs8179686  | S5  | LIMS1     | rs139621309 | S18 | "LOC100505050 | 2.31E-07 | 1        | 0.000162396 | 2.14E-08 | 0.870696 | 3.65E-05    |
| phe.Fasting_rs8179686  | S5  | LIMS1     | rs139797194 | S8  | MYO1B         | 5.57E-06 | 1        | 0.00273501  | 7.80E-06 | 1        | 0.00662804  |
| phe.Fasting_rs8179686  | S5  | LIMS1     | rs139828110 | S8  | DIAPH1        | 4.51E-08 | 1        | 3.73E-05    | 1.81E-08 | 0.736014 | 3.14E-05    |
| phe.Fasting_rs8179686  | S5  | LIMS1     | rs140070363 | S8  | DIAPH1        | 2.31E-07 | 1        | 1.62E-04    | 2.14E-08 | 0.870696 | 3.65E-05    |
| phe.Fasting_rs8179686  | S5  | LIMS1     | rs140644750 | S13 | DIAPH1        | 2.31E-07 | 1        | 1.62E-04    | 2.14E-08 | 0.870696 | 3.65E-05    |
| phe.Fasting_rs8179686  | S5  | LIMS1     | rs141022544 | S8  | DIAPH1        | 2.31E-07 | 1        | 1.62E-04    | 2.14E-08 | 0.870696 | 3.65E-05    |
| phe.Fasting_rs8179686  | S5  | LIMS1     | rs141525984 | S5  | DIAPH1        | 2.31E-07 | 1        | 1.62E-04    | 2.14E-08 | 0.870696 | 3.65E-05    |
| phe.Fasting_rs8179686  | S5  | LIMS1     | rs142480565 | S8  | DIAPH1        | 2.31E-07 | 1        | 0.000162396 | 2.14E-08 | 0.870696 | 3.65E-05    |
| phe.Fasting_rs8179686  | S5  | LIMS1     | rs142718558 | S7  | "DIAPH1,LOC   | 2.31E-07 | 1        | 1.62E-04    | 2.14E-08 | 0.870696 | 3.65E-05    |
| phe.Fasting_rs8179686  | S5  | LIMS1     | rs142789100 | S8  | DIAPH1        | 4.51E-08 | 1        | 3.73E-05    | 1.81E-08 | 0.736014 | 3.14E-05    |
| phe.Fasting_rs8179686  | S5  | LIMS1     | rs142812798 | S7  | DIAPH1        | 4.51E-08 | 1        | 3.73E-05    | 1.81E-08 | 0.736014 | 3.14E-05    |
| phe.Fasting_rs8179686  | S5  | LIMS1     | rs143377827 | S13 | "DIAPH1,LOC   | 3.03E-08 | 1        | 2.60E-05    | 1.19E-08 | 0.485592 | 2.18E-05    |
| phe.Fasting_rs8179686  | S5  | LIMS1     | rs143691978 | S11 | DIAPH1        | 4.51E-08 | 1        | 3.73E-05    | 1.91E-08 | 0.775841 | 3.29E-05    |
| phe.Fasting_rs8179686  | S5  | LIMS1     | rs144081334 | S11 | DIAPH1        | 4.51E-08 | 1        | 3.73E-05    | 1.91E-08 | 0.775841 | 3.29E-05    |

|                       |    |       |                |             |          |   |             |          |            |          |
|-----------------------|----|-------|----------------|-------------|----------|---|-------------|----------|------------|----------|
| phe.Fasting_rs8179686 | S5 | LIMS1 | rs144613910S8  | DIAPH1      | 2.31E-07 | 1 | 0.000162396 | 2.14E-08 | 0.870696   | 3.65E-05 |
| phe.Fasting_rs8179686 | S5 | LIMS1 | rs145027704S11 | DIAPH1      | 4.51E-08 | 1 | 3.73E-05    | 1.91E-08 | 0.775841   | 3.29E-05 |
| phe.Fasting_rs8179686 | S5 | LIMS1 | rs146220673S7  | DIAPH1      | 2.31E-07 | 1 | 1.62E-04    | 2.14E-08 | 0.870696   | 3.65E-05 |
| phe.Fasting_rs8179686 | S5 | LIMS1 | rs146622060S13 | DIAPH1      | 4.51E-08 | 1 | 3.73E-05    | 1.91E-08 | 0.775841   | 3.29E-05 |
| phe.Fasting_rs8179686 | S5 | LIMS1 | rs146878162S7  | DIAPH1      | 2.31E-07 | 1 | 0.000162396 | 2.14E-08 | 0.870696   | 3.65E-05 |
| phe.Fasting_rs8179686 | S5 | LIMS1 | rs147314451S8  | DIAPH1      | 2.31E-07 | 1 | 1.62E-04    | 2.14E-08 | 0.870696   | 3.65E-05 |
| phe.Fasting_rs8179686 | S5 | LIMS1 | rs147417996S7  | DIAPH1      | 4.51E-08 | 1 | 3.73E-05    | 1.91E-08 | 0.775841   | 3.29E-05 |
| phe.Fasting_rs8179686 | S5 | LIMS1 | rs147646948S7  | "LOC1005056 | 2.31E-07 | 1 | 0.000162396 | 2.14E-08 | 0.870696   | 3.65E-05 |
| phe.Fasting_rs8179686 | S5 | LIMS1 | rs147677041S8  | DIAPH1      | 4.51E-08 | 1 | 3.73E-05    | 1.81E-08 | 0.736014   | 3.14E-05 |
| phe.Fasting_rs8179686 | S5 | LIMS1 | rs148116628S7  | DIAPH1      | 2.31E-07 | 1 | 1.62E-04    | 2.14E-08 | 0.870696   | 3.65E-05 |
| phe.Fasting_rs8179686 | S5 | LIMS1 | rs148423011S7  | DIAPH1      | 2.31E-07 | 1 | 1.62E-04    | 2.14E-08 | 0.870696   | 3.65E-05 |
| phe.Fasting_rs8179686 | S5 | LIMS1 | rs149019627S8  | DIAPH1      | 4.51E-08 | 1 | 3.73E-05    | 1.81E-08 | 0.736014   | 3.14E-05 |
| phe.Fasting_rs8179686 | S5 | LIMS1 | rs149075406S8  | DIAPH1      | 2.31E-07 | 1 | 0.000162396 | 2.14E-08 | 0.870696   | 3.65E-05 |
| phe.Fasting_rs8179686 | S5 | LIMS1 | rs149334783S8  | DIAPH1      | 2.31E-07 | 1 | 0.000162396 | 2.14E-08 | 0.870696   | 3.65E-05 |
| phe.Fasting_rs8179686 | S5 | LIMS1 | rs149791570S5  | DIAPH1      | 4.51E-08 | 1 | 3.73E-05    | 1.81E-08 | 0.736014   | 3.14E-05 |
| phe.Fasting_rs8179686 | S5 | LIMS1 | rs150452206S13 | "DIAPH1,LOC | 2.31E-07 | 1 | 0.000162396 | 2.14E-08 | 0.870696   | 3.65E-05 |
| phe.Fasting_rs8179686 | S5 | LIMS1 | rs150675915S7  | DIAPH1      | 2.31E-07 | 1 | 1.62E-04    | 2.14E-08 | 0.870696   | 3.65E-05 |
| phe.Fasting_rs8179686 | S5 | LIMS1 | rs150765570S7  | DIAPH1      | 2.31E-07 | 1 | 0.000162396 | 2.14E-08 | 0.870696   | 3.65E-05 |
| phe.Fasting_rs8179686 | S5 | LIMS1 | rs150992994S11 | "PCDHGA5,PI | 2.38E-07 | 1 | 0.000167142 | 7.14E-09 | 0.290537   | 1.37E-05 |
| phe.Fasting_rs8179686 | S5 | LIMS1 | rs151204700S8  | DIAPH1      | 2.31E-07 | 1 | 0.000162396 | 2.14E-08 | 0.870696   | 3.65E-05 |
| phe.Fasting_rs8179686 | S5 | LIMS1 | rs151330468S8  | DIAPH1      | 4.51E-08 | 1 | 3.73E-05    | 1.91E-08 | 0.775841   | 3.29E-05 |
| phe.Fasting_rs8179686 | S5 | LIMS1 | rs16833550 S5  | MYO1B       | 2.97E-06 | 1 | 0.00156458  | 6.16E-09 | 0.250812   | 1.20E-05 |
| phe.Fasting_rs8179686 | S5 | LIMS1 | rs16833551 S5  | MYO1B       | 2.01E-05 | 1 | 0.00839318  | 3.32E-11 | 0.00135119 | 1.11E-07 |
| phe.Fasting_rs8179686 | S5 | LIMS1 | rs180772028S8  | "DIAPH1,LOC | 2.31E-07 | 1 | 1.62E-04    | 2.14E-08 | 0.870696   | 3.65E-05 |
| phe.Fasting_rs8179686 | S5 | LIMS1 | rs181224861S7  | DIAPH1      | 2.31E-07 | 1 | 0.000162396 | 2.14E-08 | 0.870696   | 3.65E-05 |
| phe.Fasting_rs8179686 | S5 | LIMS1 | rs182714699S8  | DIAPH1      | 2.31E-07 | 1 | 0.000162396 | 2.14E-08 | 0.870696   | 3.65E-05 |
| phe.Fasting_rs8179686 | S5 | LIMS1 | rs182965141S8  | DIAPH1      | 5.27E-08 | 1 | 4.29E-05    | 1.58E-08 | 0.643315   | 2.79E-05 |
| phe.Fasting_rs8179686 | S5 | LIMS1 | rs183597049S7  | DIAPH1      | 2.31E-07 | 1 | 0.000162396 | 2.14E-08 | 0.870696   | 3.65E-05 |
| phe.Fasting_rs8179686 | S5 | LIMS1 | rs183980988S2  | NA          | 2.31E-07 | 1 | 0.000162396 | 2.14E-08 | 0.870696   | 3.65E-05 |
| phe.Fasting_rs8179686 | S5 | LIMS1 | rs184233232S7  | DIAPH1      | 2.31E-07 | 1 | 1.62E-04    | 2.14E-08 | 0.870696   | 3.65E-05 |
| phe.Fasting_rs8179686 | S5 | LIMS1 | rs184509477S13 | "PCDHGB4,PI | 2.31E-07 | 1 | 0.000162396 | 2.14E-08 | 0.870696   | 3.65E-05 |
| phe.Fasting_rs8179686 | S5 | LIMS1 | rs185069296S15 | "LOC1005056 | 2.31E-07 | 1 | 0.000162396 | 2.14E-08 | 0.870696   | 3.65E-05 |
| phe.Fasting_rs8179686 | S5 | LIMS1 | rs185502834S8  | DIAPH1      | 4.51E-08 | 1 | 3.73E-05    | 1.81E-08 | 0.736014   | 3.14E-05 |
| phe.Fasting_rs8179686 | S5 | LIMS1 | rs185759881S7  | DIAPH1      | 2.31E-07 | 1 | 0.000162396 | 2.14E-08 | 0.870696   | 3.65E-05 |
| phe.Fasting_rs8179686 | S5 | LIMS1 | rs187000011S11 | DIAPH1      | 2.31E-07 | 1 | 1.62E-04    | 2.14E-08 | 0.870696   | 3.65E-05 |
| phe.Fasting_rs8179686 | S5 | LIMS1 | rs188981295S5  | "RPS27AP10, | 2.31E-07 | 1 | 0.000162396 | 2.14E-08 | 0.870696   | 3.65E-05 |
| phe.Fasting_rs8179686 | S5 | LIMS1 | rs190559574S7  | DIAPH1      | 4.51E-08 | 1 | 3.73E-05    | 1.81E-08 | 0.736014   | 3.14E-05 |
| phe.Fasting_rs8179686 | S5 | LIMS1 | rs191544043S8  | DIAPH1      | 2.31E-07 | 1 | 0.000162396 | 2.14E-08 | 0.870696   | 3.65E-05 |
| phe.Fasting_rs8179686 | S5 | LIMS1 | rs191766712S7  | DIAPH1      | 2.31E-07 | 1 | 0.000162396 | 2.14E-08 | 0.870696   | 3.65E-05 |
| phe.Fasting_rs8179686 | S5 | LIMS1 | rs192690040S7  | DIAPH1      | 2.31E-07 | 1 | 0.000162396 | 2.14E-08 | 0.870696   | 3.65E-05 |

|                       |     |       |                |             |          |           |             |          |           |             |
|-----------------------|-----|-------|----------------|-------------|----------|-----------|-------------|----------|-----------|-------------|
| phe.Fasting_rs8179686 | S5  | LIMS1 | rs192765219S7  | DIAPH1      | 2.31E-07 | 1         | 0.000162396 | 2.14E-08 | 0.870696  | 3.65E-05    |
| phe.Fasting_rs8179686 | S5  | LIMS1 | rs192770525S7  | DIAPH1      | 2.31E-07 | 1         | 0.000162396 | 2.14E-08 | 0.870696  | 3.65E-05    |
| phe.Fasting_rs8179686 | S5  | LIMS1 | rs35990401 S7  | DIAPH1      | 3.19E-07 | 1         | 2.19E-04    | 4.62E-09 | 0.188102  | 9.26E-06    |
| phe.Fasting_rs8179686 | S5  | LIMS1 | rs55900860 S7  | DIAPH1      | 4.51E-08 | 1         | 3.73E-05    | 1.81E-08 | 0.736014  | 3.14E-05    |
| phe.Fasting_rs8179686 | S5  | LIMS1 | rs61613048 S8  | MYO1B       | 2.37E-05 | 1.00E+00  | 9.67E-03    | 1.28E-09 | 0.0520394 | 2.94E-06    |
| phe.Fasting_rs8179686 | S5  | LIMS1 | rs73058677 S5  | MYO1B       | 2.05E-05 | 1         | 8.55E-03    | 6.70E-10 | 0.0272662 | 1.68E-06    |
| phe.Fasting_rs842453  | S11 | ESYT2 | rs57503635 S3  | NA          | 2.84E-10 | 0.0115832 | 3.41E-07    | 6.84E-07 | 1         | 0.000798477 |
| phe.Fasting_rs875142  | S4  | PAQR8 | rs139070959S8  | RPN2        | 1.43E-07 | 1         | 1.05E-04    | 9.23E-07 | 1         | 0.00104965  |
| phe.Fasting_rs875142  | S4  | PAQR8 | rs145412529S8  | "RBL1,RPS3A | 7.46E-08 | 1.00E+00  | 5.86E-05    | 1.60E-06 | 1         | 0.00170508  |
| phe.Fasting_rs930038  | S8  | LIMS1 | rs112027720S7  | DIAPH1      | 3.48E-06 | 1         | 1.80E-03    | 1.23E-05 | 1         | 0.00957693  |
| phe.Fasting_rs930038  | S8  | LIMS1 | rs112940854S5  | MYO1B       | 1.58E-05 | 1         | 6.77E-03    | 6.69E-07 | 1         | 0.000782583 |
| phe.Fasting_rs930038  | S8  | LIMS1 | rs113219478S7  | DIAPH1      | 3.48E-06 | 1.00E+00  | 1.80E-03    | 1.23E-05 | 1         | 0.00957693  |
| phe.Fasting_rs930038  | S8  | LIMS1 | rs115888477S8  | NA          | 1.69E-06 | 1         | 9.69E-04    | 4.76E-06 | 1         | 0.00439398  |
| phe.Fasting_rs930038  | S8  | LIMS1 | rs138136869S7  | DIAPH1      | 1.38E-06 | 1         | 0.000808611 | 3.97E-06 | 1         | 0.00373516  |
| phe.Fasting_rs930038  | S8  | LIMS1 | rs138487229S11 | DIAPH1      | 3.48E-06 | 1         | 0.00180387  | 1.23E-05 | 1         | 0.00957693  |
| phe.Fasting_rs930038  | S8  | LIMS1 | rs138738950S8  | "PCDHGB2,PI | 3.48E-06 | 1         | 1.80E-03    | 1.24E-05 | 1         | 0.00965861  |
| phe.Fasting_rs930038  | S8  | LIMS1 | rs139297927S8  | DIAPH1      | 3.48E-06 | 1.00E+00  | 1.80E-03    | 1.23E-05 | 1         | 0.00957693  |
| phe.Fasting_rs930038  | S8  | LIMS1 | rs139337303S8  | DIAPH1      | 3.48E-06 | 1         | 0.00180387  | 1.23E-05 | 1         | 0.00957693  |
| phe.Fasting_rs930038  | S8  | LIMS1 | rs139403963S8  | DIAPH1      | 1.38E-06 | 1.00E+00  | 8.09E-04    | 3.97E-06 | 1         | 0.00373516  |
| phe.Fasting_rs930038  | S8  | LIMS1 | rs139621309S18 | "LOC1005056 | 3.48E-06 | 1         | 1.80E-03    | 1.23E-05 | 1         | 0.00957693  |
| phe.Fasting_rs930038  | S8  | LIMS1 | rs139828110S8  | DIAPH1      | 1.38E-06 | 1         | 8.09E-04    | 3.97E-06 | 1         | 0.00373516  |
| phe.Fasting_rs930038  | S8  | LIMS1 | rs140070363S8  | DIAPH1      | 3.48E-06 | 1         | 1.80E-03    | 1.23E-05 | 1         | 0.00957693  |
| phe.Fasting_rs930038  | S8  | LIMS1 | rs140644750S13 | DIAPH1      | 3.48E-06 | 1.00E+00  | 1.80E-03    | 1.23E-05 | 1         | 0.00957693  |
| phe.Fasting_rs930038  | S8  | LIMS1 | rs141022544S8  | DIAPH1      | 3.48E-06 | 1.00E+00  | 1.80E-03    | 1.23E-05 | 1         | 0.00957693  |
| phe.Fasting_rs930038  | S8  | LIMS1 | rs141525984S5  | DIAPH1      | 3.48E-06 | 1         | 1.80E-03    | 1.23E-05 | 1         | 0.00957693  |
| phe.Fasting_rs930038  | S8  | LIMS1 | rs142480565S8  | DIAPH1      | 3.48E-06 | 1.00E+00  | 1.80E-03    | 1.23E-05 | 1         | 0.00957693  |
| phe.Fasting_rs930038  | S8  | LIMS1 | rs142718558S7  | "DIAPH1,LOC | 3.48E-06 | 1.00E+00  | 1.80E-03    | 1.23E-05 | 1         | 0.00957693  |
| phe.Fasting_rs930038  | S8  | LIMS1 | rs142789100S8  | DIAPH1      | 1.38E-06 | 1         | 0.000808611 | 3.97E-06 | 1         | 0.00373516  |
| phe.Fasting_rs930038  | S8  | LIMS1 | rs142812798S7  | DIAPH1      | 1.38E-06 | 1.00E+00  | 8.09E-04    | 3.97E-06 | 1         | 0.00373516  |
| phe.Fasting_rs930038  | S8  | LIMS1 | rs143377827S13 | "DIAPH1,LOC | 7.20E-07 | 1         | 4.54E-04    | 3.03E-06 | 1         | 0.00294684  |
| phe.Fasting_rs930038  | S8  | LIMS1 | rs143691978S11 | DIAPH1      | 1.38E-06 | 1         | 8.09E-04    | 4.05E-06 | 1         | 0.00380693  |
| phe.Fasting_rs930038  | S8  | LIMS1 | rs144081334S11 | DIAPH1      | 1.38E-06 | 1         | 0.000808611 | 4.05E-06 | 1         | 0.00380693  |
| phe.Fasting_rs930038  | S8  | LIMS1 | rs144613910S8  | DIAPH1      | 3.48E-06 | 1         | 0.00180387  | 1.23E-05 | 1         | 0.00957693  |
| phe.Fasting_rs930038  | S8  | LIMS1 | rs145027704S11 | DIAPH1      | 1.38E-06 | 1.00E+00  | 8.09E-04    | 4.05E-06 | 1         | 0.00380693  |
| phe.Fasting_rs930038  | S8  | LIMS1 | rs146220673S7  | DIAPH1      | 3.48E-06 | 1         | 1.80E-03    | 1.23E-05 | 1         | 0.00957693  |
| phe.Fasting_rs930038  | S8  | LIMS1 | rs146622060S13 | DIAPH1      | 1.38E-06 | 1         | 0.000808611 | 4.05E-06 | 1         | 0.00380693  |
| phe.Fasting_rs930038  | S8  | LIMS1 | rs146878162S7  | DIAPH1      | 3.48E-06 | 1         | 0.00180387  | 1.23E-05 | 1         | 0.00957693  |
| phe.Fasting_rs930038  | S8  | LIMS1 | rs147314451S8  | DIAPH1      | 3.48E-06 | 1         | 0.00180387  | 1.23E-05 | 1         | 0.00957693  |
| phe.Fasting_rs930038  | S8  | LIMS1 | rs147417996S7  | DIAPH1      | 1.38E-06 | 1         | 8.09E-04    | 4.05E-06 | 1         | 0.00380693  |
| phe.Fasting_rs930038  | S8  | LIMS1 | rs147646948S7  | "LOC1005056 | 3.48E-06 | 1         | 1.80E-03    | 1.23E-05 | 1         | 0.00957693  |



|                       |    |       |                 |             |          |          |             |          |   |             |
|-----------------------|----|-------|-----------------|-------------|----------|----------|-------------|----------|---|-------------|
| phe.Fasting_rs930038  | S8 | LIMS1 | rs147677041 S8  | DIAPH1      | 1.38E-06 | 1        | 8.09E-04    | 3.97E-06 | 1 | 0.00373516  |
| phe.Fasting_rs930038  | S8 | LIMS1 | rs148116628 S7  | DIAPH1      | 3.48E-06 | 1        | 1.80E-03    | 1.23E-05 | 1 | 0.00957693  |
| phe.Fasting_rs930038  | S8 | LIMS1 | rs148423011 S7  | DIAPH1      | 3.48E-06 | 1        | 1.80E-03    | 1.23E-05 | 1 | 0.00957693  |
| phe.Fasting_rs930038  | S8 | LIMS1 | rs149019627 S8  | DIAPH1      | 1.38E-06 | 1        | 8.09E-04    | 3.97E-06 | 1 | 0.00373516  |
| phe.Fasting_rs930038  | S8 | LIMS1 | rs149075406 S8  | DIAPH1      | 3.48E-06 | 1        | 1.80E-03    | 1.23E-05 | 1 | 0.00957693  |
| phe.Fasting_rs930038  | S8 | LIMS1 | rs149334783 S8  | DIAPH1      | 3.48E-06 | 1        | 1.80E-03    | 1.23E-05 | 1 | 0.00957693  |
| phe.Fasting_rs930038  | S8 | LIMS1 | rs149791570 S5  | DIAPH1      | 1.38E-06 | 1        | 8.09E-04    | 3.97E-06 | 1 | 0.00373516  |
| phe.Fasting_rs930038  | S8 | LIMS1 | rs150452206 S13 | "DIAPH1,LOC | 3.48E-06 | 1.00E+00 | 1.80E-03    | 1.23E-05 | 1 | 0.00957693  |
| phe.Fasting_rs930038  | S8 | LIMS1 | rs150675915 S7  | DIAPH1      | 3.48E-06 | 1.00E+00 | 1.80E-03    | 1.23E-05 | 1 | 0.00957693  |
| phe.Fasting_rs930038  | S8 | LIMS1 | rs150765570 S7  | DIAPH1      | 3.48E-06 | 1.00E+00 | 1.80E-03    | 1.23E-05 | 1 | 0.00957693  |
| phe.Fasting_rs930038  | S8 | LIMS1 | rs150992994 S11 | "PCDHGA5,PI | 3.52E-06 | 1.00E+00 | 1.82E-03    | 4.95E-06 | 1 | 0.00453404  |
| phe.Fasting_rs930038  | S8 | LIMS1 | rs151204700 S8  | DIAPH1      | 3.48E-06 | 1.00E+00 | 1.80E-03    | 1.23E-05 | 1 | 0.00957693  |
| phe.Fasting_rs930038  | S8 | LIMS1 | rs151330468 S8  | DIAPH1      | 1.38E-06 | 1.00E+00 | 8.09E-04    | 4.05E-06 | 1 | 0.00380693  |
| phe.Fasting_rs930038  | S8 | LIMS1 | rs16833551 S5   | MYO1B       | 1.69E-05 | 1.00E+00 | 7.21E-03    | 1.11E-07 | 1 | 0.000155671 |
| phe.Fasting_rs930038  | S8 | LIMS1 | rs180772028 S8  | "DIAPH1,LOC | 3.48E-06 | 1        | 0.00180387  | 1.23E-05 | 1 | 0.00957693  |
| phe.Fasting_rs930038  | S8 | LIMS1 | rs181224861 S7  | DIAPH1      | 3.48E-06 | 1        | 1.80E-03    | 1.23E-05 | 1 | 0.00957693  |
| phe.Fasting_rs930038  | S8 | LIMS1 | rs182714699 S8  | DIAPH1      | 3.48E-06 | 1        | 1.80E-03    | 1.23E-05 | 1 | 0.00957693  |
| phe.Fasting_rs930038  | S8 | LIMS1 | rs182965141 S8  | DIAPH1      | 1.58E-06 | 1        | 0.000909616 | 2.29E-06 | 1 | 0.00233232  |
| phe.Fasting_rs930038  | S8 | LIMS1 | rs183597049 S7  | DIAPH1      | 3.48E-06 | 1        | 0.00180387  | 1.23E-05 | 1 | 0.00957693  |
| phe.Fasting_rs930038  | S8 | LIMS1 | rs183980988 S2  | NA          | 3.48E-06 | 1        | 1.80E-03    | 1.23E-05 | 1 | 0.00957693  |
| phe.Fasting_rs930038  | S8 | LIMS1 | rs184233232 S7  | DIAPH1      | 3.48E-06 | 1        | 0.00180387  | 1.23E-05 | 1 | 0.00957693  |
| phe.Fasting_rs930038  | S8 | LIMS1 | rs184509477 S13 | "PCDHGB4,PI | 3.48E-06 | 1        | 0.00180387  | 1.23E-05 | 1 | 0.00957693  |
| phe.Fasting_rs930038  | S8 | LIMS1 | rs185069296 S15 | "LOC1005056 | 3.48E-06 | 1        | 0.00180387  | 1.23E-05 | 1 | 0.00957693  |
| phe.Fasting_rs930038  | S8 | LIMS1 | rs185502834 S8  | DIAPH1      | 1.38E-06 | 1        | 8.09E-04    | 3.97E-06 | 1 | 0.00373516  |
| phe.Fasting_rs930038  | S8 | LIMS1 | rs185759881 S7  | DIAPH1      | 3.48E-06 | 1        | 1.80E-03    | 1.23E-05 | 1 | 0.00957693  |
| phe.Fasting_rs930038  | S8 | LIMS1 | rs187000011 S11 | DIAPH1      | 3.48E-06 | 1        | 1.80E-03    | 1.23E-05 | 1 | 0.00957693  |
| phe.Fasting_rs930038  | S8 | LIMS1 | rs188981295 S5  | "RPS27AP10, | 3.48E-06 | 1        | 1.80E-03    | 1.23E-05 | 1 | 0.00957693  |
| phe.Fasting_rs930038  | S8 | LIMS1 | rs190559574 S7  | DIAPH1      | 1.38E-06 | 1        | 8.09E-04    | 3.97E-06 | 1 | 0.00373516  |
| phe.Fasting_rs930038  | S8 | LIMS1 | rs191544043 S8  | DIAPH1      | 3.48E-06 | 1        | 1.80E-03    | 1.23E-05 | 1 | 0.00957693  |
| phe.Fasting_rs930038  | S8 | LIMS1 | rs191766712 S7  | DIAPH1      | 3.48E-06 | 1        | 1.80E-03    | 1.23E-05 | 1 | 0.00957693  |
| phe.Fasting_rs930038  | S8 | LIMS1 | rs192690040 S7  | DIAPH1      | 3.48E-06 | 1        | 1.80E-03    | 1.23E-05 | 1 | 0.00957693  |
| phe.Fasting_rs930038  | S8 | LIMS1 | rs192765219 S7  | DIAPH1      | 3.48E-06 | 1        | 1.80E-03    | 1.23E-05 | 1 | 0.00957693  |
| phe.Fasting_rs930038  | S8 | LIMS1 | rs192770525 S7  | DIAPH1      | 3.48E-06 | 1.00E+00 | 1.80E-03    | 1.23E-05 | 1 | 0.00957693  |
| phe.Fasting_rs930038  | S8 | LIMS1 | rs35990401 S7   | DIAPH1      | 7.17E-06 | 1        | 0.00342486  | 2.57E-06 | 1 | 0.00255549  |
| phe.Fasting_rs930038  | S8 | LIMS1 | rs55900860 S7   | DIAPH1      | 1.38E-06 | 1.00E+00 | 8.09E-04    | 3.97E-06 | 1 | 0.00373516  |
| phe.Fasting_rs930038  | S8 | LIMS1 | rs61613048 S8   | MYO1B       | 1.65E-05 | 1        | 0.0070658   | 3.46E-07 | 1 | 0.000430848 |
| phe.Fasting_rs930038  | S8 | LIMS1 | rs73058677 S5   | MYO1B       | 1.58E-05 | 1.00E+00 | 6.77E-03    | 3.68E-07 | 1 | 0.000456103 |
| phe.Fasting_rs9308807 | S5 | LIMS1 | rs112027720 S7  | DIAPH1      | 2.35E-06 | 1.00E+00 | 1.28E-03    | 5.58E-06 | 1 | 0.00500881  |
| phe.Fasting_rs9308807 | S5 | LIMS1 | rs112940854 S5  | MYO1B       | 1.92E-05 | 1.00E+00 | 8.04E-03    | 8.38E-07 | 1 | 0.00096107  |
| phe.Fasting_rs9308807 | S5 | LIMS1 | rs113219478 S7  | DIAPH1      | 2.35E-06 | 1.00E+00 | 1.28E-03    | 5.58E-06 | 1 | 0.00500881  |

|                       |    |       |                 |             |          |          |             |          |   |            |
|-----------------------|----|-------|-----------------|-------------|----------|----------|-------------|----------|---|------------|
| phe.Fasting_rs9308807 | S5 | LIMS1 | rs115888477 S8  | NA          | 6.44E-07 | 1        | 4.11E-04    | 5.89E-06 | 1 | 0.00523297 |
| phe.Fasting_rs9308807 | S5 | LIMS1 | rs138090701 S5  | HDAC3       | 1.14E-06 | 1        | 0.000680781 | 7.54E-06 | 1 | 0.00644479 |
| phe.Fasting_rs9308807 | S5 | LIMS1 | rs138136869 S7  | DIAPH1      | 7.24E-07 | 1.00E+00 | 4.56E-04    | 2.51E-06 | 1 | 0.00250878 |
| phe.Fasting_rs9308807 | S5 | LIMS1 | rs138487229 S11 | DIAPH1      | 2.35E-06 | 1.00E+00 | 1.28E-03    | 5.58E-06 | 1 | 0.00500881 |
| phe.Fasting_rs9308807 | S5 | LIMS1 | rs138738950 S8  | "PCDHGB2,PI | 2.35E-06 | 1        | 1.28E-03    | 5.57E-06 | 1 | 5.01E-03   |
| phe.Fasting_rs9308807 | S5 | LIMS1 | rs139297927 S8  | DIAPH1      | 2.35E-06 | 1.00E+00 | 1.28E-03    | 5.58E-06 | 1 | 0.00500881 |
| phe.Fasting_rs9308807 | S5 | LIMS1 | rs139337303 S8  | DIAPH1      | 2.35E-06 | 1.00E+00 | 1.28E-03    | 5.58E-06 | 1 | 0.00500881 |
| phe.Fasting_rs9308807 | S5 | LIMS1 | rs139403963 S8  | DIAPH1      | 7.24E-07 | 1.00E+00 | 4.56E-04    | 2.51E-06 | 1 | 0.00250878 |
| phe.Fasting_rs9308807 | S5 | LIMS1 | rs139621309 S18 | "LOC1005056 | 2.35E-06 | 1.00E+00 | 1.28E-03    | 5.58E-06 | 1 | 0.00500881 |
| phe.Fasting_rs9308807 | S5 | LIMS1 | rs139828110 S8  | DIAPH1      | 7.24E-07 | 1        | 0.000456268 | 2.51E-06 | 1 | 0.00250878 |
| phe.Fasting_rs9308807 | S5 | LIMS1 | rs140070363 S8  | DIAPH1      | 2.35E-06 | 1.00E+00 | 1.28E-03    | 5.58E-06 | 1 | 0.00500881 |
| phe.Fasting_rs9308807 | S5 | LIMS1 | rs140644750 S13 | DIAPH1      | 2.35E-06 | 1        | 1.28E-03    | 5.58E-06 | 1 | 0.00500881 |
| phe.Fasting_rs9308807 | S5 | LIMS1 | rs141022544 S8  | DIAPH1      | 2.35E-06 | 1        | 1.28E-03    | 5.58E-06 | 1 | 0.00500881 |
| phe.Fasting_rs9308807 | S5 | LIMS1 | rs141525984 S5  | DIAPH1      | 2.35E-06 | 1        | 1.28E-03    | 5.58E-06 | 1 | 0.00500881 |
| phe.Fasting_rs9308807 | S5 | LIMS1 | rs142480565 S8  | DIAPH1      | 2.35E-06 | 1        | 1.28E-03    | 5.58E-06 | 1 | 0.00500881 |
| phe.Fasting_rs9308807 | S5 | LIMS1 | rs142718558 S7  | "DIAPH1,LOC | 2.35E-06 | 1        | 1.28E-03    | 5.58E-06 | 1 | 0.00500881 |
| phe.Fasting_rs9308807 | S5 | LIMS1 | rs142789100 S8  | DIAPH1      | 7.24E-07 | 1        | 4.56E-04    | 2.51E-06 | 1 | 0.00250878 |
| phe.Fasting_rs9308807 | S5 | LIMS1 | rs142812798 S7  | DIAPH1      | 7.24E-07 | 1        | 4.56E-04    | 2.51E-06 | 1 | 0.00250878 |
| phe.Fasting_rs9308807 | S5 | LIMS1 | rs143377827 S13 | "DIAPH1,LOC | 3.87E-07 | 1        | 2.62E-04    | 1.87E-06 | 1 | 0.00195041 |
| phe.Fasting_rs9308807 | S5 | LIMS1 | rs143691978 S11 | DIAPH1      | 7.24E-07 | 1        | 0.000456268 | 2.58E-06 | 1 | 0.00256916 |
| phe.Fasting_rs9308807 | S5 | LIMS1 | rs144081334 S11 | DIAPH1      | 7.24E-07 | 1        | 0.000456268 | 2.58E-06 | 1 | 0.00256916 |
| phe.Fasting_rs9308807 | S5 | LIMS1 | rs144613910 S8  | DIAPH1      | 2.35E-06 | 1        | 0.00128405  | 5.58E-06 | 1 | 0.00500881 |
| phe.Fasting_rs9308807 | S5 | LIMS1 | rs145027704 S11 | DIAPH1      | 7.24E-07 | 1        | 0.000456268 | 2.58E-06 | 1 | 0.00256916 |
| phe.Fasting_rs9308807 | S5 | LIMS1 | rs146220673 S7  | DIAPH1      | 2.35E-06 | 1.00E+00 | 1.28E-03    | 5.58E-06 | 1 | 5.01E-03   |
| phe.Fasting_rs9308807 | S5 | LIMS1 | rs146622060 S13 | DIAPH1      | 7.24E-07 | 1.00E+00 | 4.56E-04    | 2.58E-06 | 1 | 0.00256916 |
| phe.Fasting_rs9308807 | S5 | LIMS1 | rs146878162 S7  | DIAPH1      | 2.35E-06 | 1        | 1.28E-03    | 5.58E-06 | 1 | 0.00500881 |
| phe.Fasting_rs9308807 | S5 | LIMS1 | rs147314451 S8  | DIAPH1      | 2.35E-06 | 1        | 1.28E-03    | 5.58E-06 | 1 | 0.00500881 |
| phe.Fasting_rs9308807 | S5 | LIMS1 | rs147417996 S7  | DIAPH1      | 7.24E-07 | 1        | 4.56E-04    | 2.58E-06 | 1 | 0.00256916 |
| phe.Fasting_rs9308807 | S5 | LIMS1 | rs147646948 S7  | "LOC1005056 | 2.35E-06 | 1        | 1.28E-03    | 5.58E-06 | 1 | 0.00500881 |
| phe.Fasting_rs9308807 | S5 | LIMS1 | rs147677041 S8  | DIAPH1      | 7.24E-07 | 1        | 4.56E-04    | 2.51E-06 | 1 | 0.00250878 |
| phe.Fasting_rs9308807 | S5 | LIMS1 | rs148116628 S7  | DIAPH1      | 2.35E-06 | 1        | 1.28E-03    | 5.58E-06 | 1 | 0.00500881 |
| phe.Fasting_rs9308807 | S5 | LIMS1 | rs148423011 S7  | DIAPH1      | 2.35E-06 | 1        | 1.28E-03    | 5.58E-06 | 1 | 0.00500881 |
| phe.Fasting_rs9308807 | S5 | LIMS1 | rs149019627 S8  | DIAPH1      | 7.24E-07 | 1        | 4.56E-04    | 2.51E-06 | 1 | 0.00250878 |
| phe.Fasting_rs9308807 | S5 | LIMS1 | rs149075406 S8  | DIAPH1      | 2.35E-06 | 1        | 1.28E-03    | 5.58E-06 | 1 | 0.00500881 |
| phe.Fasting_rs9308807 | S5 | LIMS1 | rs149334783 S8  | DIAPH1      | 2.35E-06 | 1        | 1.28E-03    | 5.58E-06 | 1 | 0.00500881 |
| phe.Fasting_rs9308807 | S5 | LIMS1 | rs149791570 S5  | DIAPH1      | 7.24E-07 | 1.00E+00 | 4.56E-04    | 2.51E-06 | 1 | 0.00250878 |
| phe.Fasting_rs9308807 | S5 | LIMS1 | rs150452206 S13 | "DIAPH1,LOC | 2.35E-06 | 1.00E+00 | 1.28E-03    | 5.58E-06 | 1 | 5.01E-03   |
| phe.Fasting_rs9308807 | S5 | LIMS1 | rs150675915 S7  | DIAPH1      | 2.35E-06 | 1.00E+00 | 1.28E-03    | 5.58E-06 | 1 | 0.00500881 |
| phe.Fasting_rs9308807 | S5 | LIMS1 | rs150765570 S7  | DIAPH1      | 2.35E-06 | 1.00E+00 | 1.28E-03    | 5.58E-06 | 1 | 0.00500881 |
| phe.Fasting_rs9308807 | S5 | LIMS1 | rs150992994 S11 | "PCDHGA5,PI | 2.36E-06 | 1.00E+00 | 1.29E-03    | 2.32E-06 | 1 | 0.00235104 |

|                       |    |        |                |             |          |          |             |          |           |             |
|-----------------------|----|--------|----------------|-------------|----------|----------|-------------|----------|-----------|-------------|
| phe.Fasting_rs9308807 | S5 | LIMS1  | rs151204700S8  | DIAPH1      | 2.35E-06 | 1        | 1.28E-03    | 5.58E-06 | 1         | 0.00500881  |
| phe.Fasting_rs9308807 | S5 | LIMS1  | rs151330468S8  | DIAPH1      | 7.24E-07 | 1.00E+00 | 4.56E-04    | 2.58E-06 | 1         | 0.00256916  |
| phe.Fasting_rs9308807 | S5 | LIMS1  | rs16833551 S5  | MYO1B       | 2.05E-05 | 1        | 8.52E-03    | 1.40E-07 | 1         | 0.000192036 |
| phe.Fasting_rs9308807 | S5 | LIMS1  | rs180772028S8  | "DIAPH1,LOC | 2.35E-06 | 1.00E+00 | 1.28E-03    | 5.58E-06 | 1         | 0.00500881  |
| phe.Fasting_rs9308807 | S5 | LIMS1  | rs181224861S7  | DIAPH1      | 2.35E-06 | 1.00E+00 | 1.28E-03    | 5.58E-06 | 1         | 0.00500881  |
| phe.Fasting_rs9308807 | S5 | LIMS1  | rs182714699S8  | DIAPH1      | 2.35E-06 | 1.00E+00 | 1.28E-03    | 5.58E-06 | 1         | 0.00500881  |
| phe.Fasting_rs9308807 | S5 | LIMS1  | rs182965141S8  | DIAPH1      | 8.32E-07 | 1.00E+00 | 5.14E-04    | 1.64E-06 | 1         | 0.00173454  |
| phe.Fasting_rs9308807 | S5 | LIMS1  | rs183597049S7  | DIAPH1      | 2.35E-06 | 1.00E+00 | 1.28E-03    | 5.58E-06 | 1         | 0.00500881  |
| phe.Fasting_rs9308807 | S5 | LIMS1  | rs183980988S2  | NA          | 2.35E-06 | 1.00E+00 | 1.28E-03    | 5.58E-06 | 1         | 0.00500881  |
| phe.Fasting_rs9308807 | S5 | LIMS1  | rs184233232S7  | DIAPH1      | 2.35E-06 | 1.00E+00 | 1.28E-03    | 5.58E-06 | 1         | 0.00500881  |
| phe.Fasting_rs9308807 | S5 | LIMS1  | rs184509477S13 | "PCDHGB4,PI | 2.35E-06 | 1.00E+00 | 1.28E-03    | 5.58E-06 | 1         | 0.00500881  |
| phe.Fasting_rs9308807 | S5 | LIMS1  | rs185069296S15 | "LOC1005056 | 2.35E-06 | 1.00E+00 | 1.28E-03    | 5.58E-06 | 1         | 0.00500881  |
| phe.Fasting_rs9308807 | S5 | LIMS1  | rs185502834S8  | DIAPH1      | 7.24E-07 | 1.00E+00 | 4.56E-04    | 2.51E-06 | 1         | 0.00250878  |
| phe.Fasting_rs9308807 | S5 | LIMS1  | rs185759881S7  | DIAPH1      | 2.35E-06 | 1.00E+00 | 1.28E-03    | 5.58E-06 | 1         | 0.00500881  |
| phe.Fasting_rs9308807 | S5 | LIMS1  | rs187000011S11 | DIAPH1      | 2.35E-06 | 1        | 1.28E-03    | 5.58E-06 | 1         | 0.00500881  |
| phe.Fasting_rs9308807 | S5 | LIMS1  | rs188981295S5  | "RPS27AP10, | 2.35E-06 | 1        | 1.28E-03    | 5.58E-06 | 1         | 0.00500881  |
| phe.Fasting_rs9308807 | S5 | LIMS1  | rs190559574S7  | DIAPH1      | 7.24E-07 | 1.00E+00 | 4.56E-04    | 2.51E-06 | 1         | 0.00250878  |
| phe.Fasting_rs9308807 | S5 | LIMS1  | rs191544043S8  | DIAPH1      | 2.35E-06 | 1.00E+00 | 1.28E-03    | 5.58E-06 | 1         | 0.00500881  |
| phe.Fasting_rs9308807 | S5 | LIMS1  | rs191766712S7  | DIAPH1      | 2.35E-06 | 1.00E+00 | 1.28E-03    | 5.58E-06 | 1         | 0.00500881  |
| phe.Fasting_rs9308807 | S5 | LIMS1  | rs192690040S7  | DIAPH1      | 2.35E-06 | 1.00E+00 | 1.28E-03    | 5.58E-06 | 1         | 0.00500881  |
| phe.Fasting_rs9308807 | S5 | LIMS1  | rs192765219S7  | DIAPH1      | 2.35E-06 | 1.00E+00 | 1.28E-03    | 5.58E-06 | 1         | 0.00500881  |
| phe.Fasting_rs9308807 | S5 | LIMS1  | rs192770525S7  | DIAPH1      | 2.35E-06 | 1.00E+00 | 1.28E-03    | 5.58E-06 | 1         | 0.00500881  |
| phe.Fasting_rs9308807 | S5 | LIMS1  | rs35990401 S7  | DIAPH1      | 4.67E-06 | 1.00E+00 | 2.34E-03    | 1.30E-06 | 1         | 0.00142873  |
| phe.Fasting_rs9308807 | S5 | LIMS1  | rs55900860 S7  | DIAPH1      | 7.24E-07 | 1        | 4.56E-04    | 2.51E-06 | 1         | 0.00250878  |
| phe.Fasting_rs9308807 | S5 | LIMS1  | rs61613048 S8  | MYO1B       | 2.16E-05 | 1        | 8.91E-03    | 4.36E-07 | 1         | 0.000527729 |
| phe.Fasting_rs9308807 | S5 | LIMS1  | rs73058677 S5  | MYO1B       | 1.92E-05 | 1        | 8.04E-03    | 2.24E-07 | 1         | 0.000293135 |
| phe.Fasting_rs9526023 | S8 | NUFIP1 | rs139070959S8  | RPN2        | 2.18E-18 | 8.89E-11 | 4.32E-14    | 4.04E-09 | 0.164256  | 8.28E-06    |
| phe.Fasting_rs9526023 | S8 | NUFIP1 | rs145412529S8  | "RBL1,RPS3A | 5.99E-07 | 1        | 3.86E-04    | 4.32E-09 | 0.175882  | 8.81E-06    |
| phe.Fasting_rs9691409 | S8 | COPG2  | rs116079984S8  | KPNA3       | 5.37E-06 | 1        | 2.65E-03    | 6.86E-10 | 0.0279037 | 1.71E-06    |
| phe.Fasting_rs9838049 | S7 | FANCD2 | rs112027720S7  | DIAPH1      | 4.36E-07 | 1        | 2.89E-04    | 1.62E-06 | 1         | 0.00171838  |
| phe.Fasting_rs9838049 | S7 | FANCD2 | rs113219478S7  | DIAPH1      | 4.36E-07 | 1        | 2.89E-04    | 1.62E-06 | 1         | 0.00171838  |
| phe.Fasting_rs9838049 | S7 | FANCD2 | rs116279995S20 | "PCDHGA4,PI | 6.20E-07 | 1.00E+00 | 3.98E-04    | 3.53E-06 | 1         | 0.00337922  |
| phe.Fasting_rs9838049 | S7 | FANCD2 | rs138090701S5  | HDAC3       | 9.73E-07 | 1        | 5.92E-04    | 5.73E-06 | 1         | 0.00512168  |
| phe.Fasting_rs9838049 | S7 | FANCD2 | rs138136869S7  | DIAPH1      | 7.49E-08 | 1.00E+00 | 5.87E-05    | 2.85E-07 | 1         | 0.000361911 |
| phe.Fasting_rs9838049 | S7 | FANCD2 | rs138457103S10 | DIAPH1      | 2.44E-07 | 1        | 1.71E-04    | 1.37E-06 | 1         | 0.00149224  |
| phe.Fasting_rs9838049 | S7 | FANCD2 | rs138487229S11 | DIAPH1      | 4.36E-07 | 1        | 0.000289116 | 1.62E-06 | 1         | 0.00171838  |
| phe.Fasting_rs9838049 | S7 | FANCD2 | rs138738950S8  | "PCDHGB2,PI | 4.36E-07 | 1.00E+00 | 2.89E-04    | 1.61E-06 | 1         | 0.0017121   |
| phe.Fasting_rs9838049 | S7 | FANCD2 | rs139297927S8  | DIAPH1      | 4.36E-07 | 1.00E+00 | 2.89E-04    | 1.62E-06 | 1         | 0.00171838  |
| phe.Fasting_rs9838049 | S7 | FANCD2 | rs139337303S8  | DIAPH1      | 4.36E-07 | 1.00E+00 | 2.89E-04    | 1.62E-06 | 1         | 0.00171838  |
| phe.Fasting_rs9838049 | S7 | FANCD2 | rs139403963S8  | DIAPH1      | 7.49E-08 | 1        | 5.87E-05    | 2.85E-07 | 1         | 0.000361911 |

|                       |    |        |                |             |          |          |             |          |   |             |
|-----------------------|----|--------|----------------|-------------|----------|----------|-------------|----------|---|-------------|
| phe.Fasting_rs9838049 | S7 | FANCD2 | rs139621309S18 | "LOC1005056 | 4.36E-07 | 1        | 0.000289116 | 1.62E-06 | 1 | 0.00171838  |
| phe.Fasting_rs9838049 | S7 | FANCD2 | rs139828110S8  | DIAPH1      | 7.49E-08 | 1.00E+00 | 5.87E-05    | 2.85E-07 | 1 | 0.000361911 |
| phe.Fasting_rs9838049 | S7 | FANCD2 | rs140070363S8  | DIAPH1      | 4.36E-07 | 1.00E+00 | 2.89E-04    | 1.62E-06 | 1 | 0.00171838  |
| phe.Fasting_rs9838049 | S7 | FANCD2 | rs140644750S13 | DIAPH1      | 4.36E-07 | 1        | 0.000289116 | 1.62E-06 | 1 | 0.00171838  |
| phe.Fasting_rs9838049 | S7 | FANCD2 | rs141022544S8  | DIAPH1      | 4.36E-07 | 1        | 0.000289116 | 1.62E-06 | 1 | 0.00171838  |
| phe.Fasting_rs9838049 | S7 | FANCD2 | rs141525984S5  | DIAPH1      | 4.36E-07 | 1        | 2.89E-04    | 1.62E-06 | 1 | 0.00171838  |
| phe.Fasting_rs9838049 | S7 | FANCD2 | rs141692339S3  | "PCDHGA6,Pi | 8.21E-07 | 1        | 0.000508152 | 5.19E-06 | 1 | 0.00472329  |
| phe.Fasting_rs9838049 | S7 | FANCD2 | rs141926074S8  | ATE1        | 2.88E-07 | 1        | 1.99E-04    | 2.16E-06 | 1 | 0.00221082  |
| phe.Fasting_rs9838049 | S7 | FANCD2 | rs142480565S8  | DIAPH1      | 4.36E-07 | 1        | 0.000289116 | 1.62E-06 | 1 | 0.00171838  |
| phe.Fasting_rs9838049 | S7 | FANCD2 | rs142718558S7  | "DIAPH1,LOC | 4.36E-07 | 1        | 0.000289116 | 1.62E-06 | 1 | 1.72E-03    |
| phe.Fasting_rs9838049 | S7 | FANCD2 | rs142789100S8  | DIAPH1      | 7.49E-08 | 1        | 5.87E-05    | 2.85E-07 | 1 | 0.000361911 |
| phe.Fasting_rs9838049 | S7 | FANCD2 | rs142812798S7  | DIAPH1      | 7.49E-08 | 1.00E+00 | 5.87E-05    | 2.85E-07 | 1 | 0.000361911 |
| phe.Fasting_rs9838049 | S7 | FANCD2 | rs143377827S13 | "DIAPH1,LOC | 8.22E-08 | 1.00E+00 | 6.39E-05    | 2.35E-07 | 1 | 0.000304848 |
| phe.Fasting_rs9838049 | S7 | FANCD2 | rs143691978S11 | DIAPH1      | 7.49E-08 | 1        | 5.87E-05    | 2.97E-07 | 1 | 0.000375916 |
| phe.Fasting_rs9838049 | S7 | FANCD2 | rs144081334S11 | DIAPH1      | 7.49E-08 | 1.00E+00 | 5.87E-05    | 2.97E-07 | 1 | 0.000375916 |
| phe.Fasting_rs9838049 | S7 | FANCD2 | rs144613910S8  | DIAPH1      | 4.36E-07 | 1.00E+00 | 2.89E-04    | 1.62E-06 | 1 | 0.00171838  |
| phe.Fasting_rs9838049 | S7 | FANCD2 | rs145027704S11 | DIAPH1      | 7.49E-08 | 1.00E+00 | 5.87E-05    | 2.97E-07 | 1 | 0.000375916 |
| phe.Fasting_rs9838049 | S7 | FANCD2 | rs146220673S7  | DIAPH1      | 4.36E-07 | 1        | 2.89E-04    | 1.62E-06 | 1 | 0.00171838  |
| phe.Fasting_rs9838049 | S7 | FANCD2 | rs146622060S13 | DIAPH1      | 7.49E-08 | 1        | 5.87E-05    | 2.97E-07 | 1 | 0.000375916 |
| phe.Fasting_rs9838049 | S7 | FANCD2 | rs146878162S7  | DIAPH1      | 4.36E-07 | 1        | 2.89E-04    | 1.62E-06 | 1 | 0.00171838  |
| phe.Fasting_rs9838049 | S7 | FANCD2 | rs147314451S8  | DIAPH1      | 4.36E-07 | 1        | 2.89E-04    | 1.62E-06 | 1 | 0.00171838  |
| phe.Fasting_rs9838049 | S7 | FANCD2 | rs147417996S7  | DIAPH1      | 7.49E-08 | 1        | 5.87E-05    | 2.97E-07 | 1 | 3.76E-04    |
| phe.Fasting_rs9838049 | S7 | FANCD2 | rs147506725S21 | "PCDHGA1,Pi | 6.20E-07 | 1        | 0.000397692 | 3.53E-06 | 1 | 3.38E-03    |
| phe.Fasting_rs9838049 | S7 | FANCD2 | rs147646948S7  | "LOC1005056 | 4.36E-07 | 1        | 0.000289116 | 1.62E-06 | 1 | 1.72E-03    |
| phe.Fasting_rs9838049 | S7 | FANCD2 | rs147677041S8  | DIAPH1      | 7.49E-08 | 1        | 5.87E-05    | 2.85E-07 | 1 | 3.62E-04    |
| phe.Fasting_rs9838049 | S7 | FANCD2 | rs148116628S7  | DIAPH1      | 4.36E-07 | 1        | 2.89E-04    | 1.62E-06 | 1 | 0.00171838  |
| phe.Fasting_rs9838049 | S7 | FANCD2 | rs148423011S7  | DIAPH1      | 4.36E-07 | 1        | 2.89E-04    | 1.62E-06 | 1 | 0.00171838  |
| phe.Fasting_rs9838049 | S7 | FANCD2 | rs149019627S8  | DIAPH1      | 7.49E-08 | 1        | 5.87E-05    | 2.85E-07 | 1 | 0.000361911 |
| phe.Fasting_rs9838049 | S7 | FANCD2 | rs149075406S8  | DIAPH1      | 4.36E-07 | 1        | 2.89E-04    | 1.62E-06 | 1 | 0.00171838  |
| phe.Fasting_rs9838049 | S7 | FANCD2 | rs149334783S8  | DIAPH1      | 4.36E-07 | 1.00E+00 | 2.89E-04    | 1.62E-06 | 1 | 0.00171838  |
| phe.Fasting_rs9838049 | S7 | FANCD2 | rs149553852S21 | "PCDHGA10,I | 6.20E-07 | 1.00E+00 | 3.98E-04    | 3.53E-06 | 1 | 0.00337922  |
| phe.Fasting_rs9838049 | S7 | FANCD2 | rs149716949S5  | DIAPH1      | 4.70E-08 | 1.00E+00 | 3.87E-05    | 3.17E-07 | 1 | 0.000398509 |
| phe.Fasting_rs9838049 | S7 | FANCD2 | rs149791570S5  | DIAPH1      | 7.49E-08 | 1.00E+00 | 5.87E-05    | 2.85E-07 | 1 | 0.000361911 |
| phe.Fasting_rs9838049 | S7 | FANCD2 | rs150452206S13 | "DIAPH1,LOC | 4.36E-07 | 1.00E+00 | 2.89E-04    | 1.62E-06 | 1 | 0.00171838  |
| phe.Fasting_rs9838049 | S7 | FANCD2 | rs150675915S7  | DIAPH1      | 4.36E-07 | 1.00E+00 | 2.89E-04    | 1.62E-06 | 1 | 0.00171838  |
| phe.Fasting_rs9838049 | S7 | FANCD2 | rs150765570S7  | DIAPH1      | 4.36E-07 | 1.00E+00 | 2.89E-04    | 1.62E-06 | 1 | 0.00171838  |
| phe.Fasting_rs9838049 | S7 | FANCD2 | rs150992994S11 | "PCDHGA5,Pi | 4.50E-07 | 1.00E+00 | 2.89E-04    | 1.56E-06 | 1 | 0.00166348  |
| phe.Fasting_rs9838049 | S7 | FANCD2 | rs151204700S8  | DIAPH1      | 4.36E-07 | 1.00E+00 | 2.89E-04    | 1.62E-06 | 1 | 0.00171838  |
| phe.Fasting_rs9838049 | S7 | FANCD2 | rs151330468S8  | DIAPH1      | 7.49E-08 | 1.00E+00 | 5.87E-05    | 2.97E-07 | 1 | 0.000375916 |
| phe.Fasting_rs9838049 | S7 | FANCD2 | rs180772028S8  | "DIAPH1,LOC | 4.36E-07 | 1        | 0.000289116 | 1.62E-06 | 1 | 0.00171838  |

|              |           |    |            |             |     |             |          |          |             |          |          |             |
|--------------|-----------|----|------------|-------------|-----|-------------|----------|----------|-------------|----------|----------|-------------|
| phe.Fasting_ | rs9838049 | S7 | FANCD2     | rs181224861 | S7  | DIAPH1      | 4.36E-07 | 1        | 0.000289116 | 1.62E-06 | 1        | 0.00171838  |
| phe.Fasting_ | rs9838049 | S7 | FANCD2     | rs181247960 | S21 | "PCDHGA9,PI | 6.20E-07 | 1        | 0.000397692 | 3.53E-06 | 1        | 0.00337922  |
| phe.Fasting_ | rs9838049 | S7 | FANCD2     | rs181824655 | S21 | "PCDHGB6,PI | 6.20E-07 | 1        | 0.000397692 | 3.53E-06 | 1        | 0.00337922  |
| phe.Fasting_ | rs9838049 | S7 | FANCD2     | rs182714699 | S8  | DIAPH1      | 4.36E-07 | 1        | 2.89E-04    | 1.62E-06 | 1        | 0.00171838  |
| phe.Fasting_ | rs9838049 | S7 | FANCD2     | rs182958142 | S8  | DIAPH1      | 2.15E-07 | 1        | 0.0001523   | 5.72E-06 | 1        | 0.00511188  |
| phe.Fasting_ | rs9838049 | S7 | FANCD2     | rs182965141 | S8  | DIAPH1      | 8.44E-08 | 1        | 6.55E-05    | 3.00E-06 | 1        | 0.00292277  |
| phe.Fasting_ | rs9838049 | S7 | FANCD2     | rs183597049 | S7  | DIAPH1      | 4.36E-07 | 1        | 0.000289116 | 1.62E-06 | 1        | 0.00171838  |
| phe.Fasting_ | rs9838049 | S7 | FANCD2     | rs183980988 | S2  | NA          | 4.36E-07 | 1        | 0.000289116 | 1.62E-06 | 1        | 0.00171838  |
| phe.Fasting_ | rs9838049 | S7 | FANCD2     | rs184233232 | S7  | DIAPH1      | 4.36E-07 | 1        | 0.000289116 | 1.62E-06 | 1        | 0.00171838  |
| phe.Fasting_ | rs9838049 | S7 | FANCD2     | rs184509477 | S13 | "PCDHGB4,PI | 4.36E-07 | 1        | 0.000289116 | 1.62E-06 | 1        | 0.00171838  |
| phe.Fasting_ | rs9838049 | S7 | FANCD2     | rs185069296 | S15 | "LOC1005056 | 4.36E-07 | 1        | 0.000289116 | 1.62E-06 | 1        | 0.00171838  |
| phe.Fasting_ | rs9838049 | S7 | FANCD2     | rs185502834 | S8  | DIAPH1      | 7.49E-08 | 1        | 5.87E-05    | 2.85E-07 | 1        | 0.000361911 |
| phe.Fasting_ | rs9838049 | S7 | FANCD2     | rs185759881 | S7  | DIAPH1      | 4.36E-07 | 1        | 0.000289116 | 1.62E-06 | 1        | 0.00171838  |
| phe.Fasting_ | rs9838049 | S7 | FANCD2     | rs186288044 | S21 | "PCDHGB4,PI | 6.20E-07 | 1        | 0.000397692 | 3.53E-06 | 1        | 0.00337922  |
| phe.Fasting_ | rs9838049 | S7 | FANCD2     | rs187000011 | S11 | DIAPH1      | 4.36E-07 | 1        | 0.000289116 | 1.62E-06 | 1        | 0.00171838  |
| phe.Fasting_ | rs9838049 | S7 | FANCD2     | rs188981295 | S5  | "RPS27AP10, | 4.36E-07 | 1        | 0.000289116 | 1.62E-06 | 1        | 0.00171838  |
| phe.Fasting_ | rs9838049 | S7 | FANCD2     | rs190559574 | S7  | DIAPH1      | 7.49E-08 | 1        | 5.87E-05    | 2.85E-07 | 1        | 0.000361911 |
| phe.Fasting_ | rs9838049 | S7 | FANCD2     | rs191544043 | S8  | DIAPH1      | 4.36E-07 | 1        | 0.000289116 | 1.62E-06 | 1        | 0.00171838  |
| phe.Fasting_ | rs9838049 | S7 | FANCD2     | rs191766712 | S7  | DIAPH1      | 4.36E-07 | 1        | 0.000289116 | 1.62E-06 | 1        | 0.00171838  |
| phe.Fasting_ | rs9838049 | S7 | FANCD2     | rs192690040 | S7  | DIAPH1      | 4.36E-07 | 1        | 0.000289116 | 1.62E-06 | 1        | 0.00171838  |
| phe.Fasting_ | rs9838049 | S7 | FANCD2     | rs192765219 | S7  | DIAPH1      | 4.36E-07 | 1        | 0.000289116 | 1.62E-06 | 1        | 0.00171838  |
| phe.Fasting_ | rs9838049 | S7 | FANCD2     | rs192770525 | S7  | DIAPH1      | 4.36E-07 | 1        | 0.000289116 | 1.62E-06 | 1        | 0.00171838  |
| phe.Fasting_ | rs9838049 | S7 | FANCD2     | rs35990401  | S7  | DIAPH1      | 3.35E-07 | 1        | 0.000229529 | 5.65E-07 | 1        | 0.000669255 |
| phe.Fasting_ | rs9838049 | S7 | FANCD2     | rs3856797   | S12 | VGLL4       | 1.22E-05 | 1        | 0.00541401  | 6.19E-07 | 1        | 0.000728414 |
| phe.Fasting_ | rs9838049 | S7 | FANCD2     | rs55900860  | S7  | DIAPH1      | 7.49E-08 | 1        | 5.87E-05    | 2.85E-07 | 1        | 0.000361911 |
| phe.Fasting_ | rs9838049 | S7 | FANCD2     | rs57503635  | S3  | NA          | 3.60E-09 | 0.147212 | 3.63E-06    | 4.64E-17 | 1.89E-09 | 3.64E-12    |
| phe.Fasting_ | rs9838049 | S7 | FANCD2     | rs79517926  | S15 | "DIAPH1,LOC | 1.06E-07 | 1        | 8.00E-05    | 2.93E-06 | 1        | 0.00287018  |
| phe.Fasting_ | rs9856270 | S8 | "FANCD2OS, | rs112027720 | S7  | DIAPH1      | 3.42E-07 | 1        | 0.000233892 | 1.53E-06 | 1        | 0.00164527  |
| phe.Fasting_ | rs9856270 | S8 | "FANCD2OS, | rs113219478 | S7  | DIAPH1      | 3.42E-07 | 1        | 0.000233892 | 1.53E-06 | 1        | 0.00164527  |
| phe.Fasting_ | rs9856270 | S8 | "FANCD2OS, | rs115888477 | S8  | NA          | 6.64E-07 | 1        | 0.000422395 | 5.07E-06 | 1        | 4.62E-03    |
| phe.Fasting_ | rs9856270 | S8 | "FANCD2OS, | rs116279995 | S20 | "PCDHGA4,PI | 4.65E-07 | 1        | 0.000307369 | 3.29E-06 | 1        | 0.00317534  |
| phe.Fasting_ | rs9856270 | S8 | "FANCD2OS, | rs138090701 | S5  | HDAC3       | 7.54E-07 | 1        | 0.000471909 | 5.42E-06 | 1        | 0.00490399  |
| phe.Fasting_ | rs9856270 | S8 | "FANCD2OS, | rs138136869 | S7  | DIAPH1      | 5.59E-08 | 1        | 4.54E-05    | 2.68E-07 | 1        | 0.000343099 |
| phe.Fasting_ | rs9856270 | S8 | "FANCD2OS, | rs138457103 | S10 | DIAPH1      | 1.87E-07 | 1        | 0.000134228 | 1.29E-06 | 1        | 0.00141637  |
| phe.Fasting_ | rs9856270 | S8 | "FANCD2OS, | rs138487229 | S11 | DIAPH1      | 3.42E-07 | 1        | 0.000233892 | 1.53E-06 | 1        | 0.00164527  |
| phe.Fasting_ | rs9856270 | S8 | "FANCD2OS, | rs138738950 | S8  | "PCDHGB2,PI | 3.42E-07 | 1        | 0.000233892 | 1.52E-06 | 1        | 0.00163535  |
| phe.Fasting_ | rs9856270 | S8 | "FANCD2OS, | rs139297927 | S8  | DIAPH1      | 3.42E-07 | 1        | 0.000233892 | 1.53E-06 | 1        | 0.00164527  |
| phe.Fasting_ | rs9856270 | S8 | "FANCD2OS, | rs139337303 | S8  | DIAPH1      | 3.42E-07 | 1        | 0.000233892 | 1.53E-06 | 1        | 0.00164527  |
| phe.Fasting_ | rs9856270 | S8 | "FANCD2OS, | rs139403963 | S8  | DIAPH1      | 5.59E-08 | 1        | 4.54E-05    | 2.68E-07 | 1        | 0.000343099 |
| phe.Fasting_ | rs9856270 | S8 | "FANCD2OS, | rs139621309 | S18 | "LOC1005056 | 3.42E-07 | 1        | 0.000233892 | 1.53E-06 | 1        | 0.00164527  |

|                       |    |                            |             |          |          |             |          |   |             |
|-----------------------|----|----------------------------|-------------|----------|----------|-------------|----------|---|-------------|
| phe.Fasting_rs9856270 | S8 | "FANCD2OS,Irs139828110 S8  | DIAPH1      | 5.59E-08 | 1        | 4.54E-05    | 2.68E-07 | 1 | 0.000343099 |
| phe.Fasting_rs9856270 | S8 | "FANCD2OS,Irs140070363 S8  | DIAPH1      | 3.42E-07 | 1        | 0.000233892 | 1.53E-06 | 1 | 0.00164527  |
| phe.Fasting_rs9856270 | S8 | "FANCD2OS,Irs140644750 S13 | DIAPH1      | 3.42E-07 | 1        | 0.000233892 | 1.53E-06 | 1 | 0.00164527  |
| phe.Fasting_rs9856270 | S8 | "FANCD2OS,Irs141022544 S8  | DIAPH1      | 3.42E-07 | 1        | 0.000233892 | 1.53E-06 | 1 | 0.00164527  |
| phe.Fasting_rs9856270 | S8 | "FANCD2OS,Irs141525984 S5  | DIAPH1      | 3.42E-07 | 1        | 0.000233892 | 1.53E-06 | 1 | 0.00164527  |
| phe.Fasting_rs9856270 | S8 | "FANCD2OS,Irs141692339 S3  | "PCDHGA6,Pi | 6.25E-07 | 1        | 0.000400299 | 4.84E-06 | 1 | 0.00445101  |
| phe.Fasting_rs9856270 | S8 | "FANCD2OS,Irs141926074 S8  | ATE1        | 2.24E-07 | 1        | 0.000158104 | 2.02E-06 | 1 | 0.00208672  |
| phe.Fasting_rs9856270 | S8 | "FANCD2OS,Irs142480565 S8  | DIAPH1      | 3.42E-07 | 1        | 2.34E-04    | 1.53E-06 | 1 | 0.00164527  |
| phe.Fasting_rs9856270 | S8 | "FANCD2OS,Irs142718558 S7  | "DIAPH1,LOC | 3.42E-07 | 1        | 0.000233892 | 1.53E-06 | 1 | 1.65E-03    |
| phe.Fasting_rs9856270 | S8 | "FANCD2OS,Irs142789100 S8  | DIAPH1      | 5.59E-08 | 1        | 4.54E-05    | 2.68E-07 | 1 | 0.000343099 |
| phe.Fasting_rs9856270 | S8 | "FANCD2OS,Irs142812798 S7  | DIAPH1      | 5.59E-08 | 1        | 4.54E-05    | 2.68E-07 | 1 | 0.000343099 |
| phe.Fasting_rs9856270 | S8 | "FANCD2OS,Irs143377827 S13 | "DIAPH1,LOC | 6.18E-08 | 1        | 4.97E-05    | 2.22E-07 | 1 | 0.000289987 |
| phe.Fasting_rs9856270 | S8 | "FANCD2OS,Irs143691978 S11 | DIAPH1      | 5.59E-08 | 1        | 4.54E-05    | 2.79E-07 | 1 | 3.56E-04    |
| phe.Fasting_rs9856270 | S8 | "FANCD2OS,Irs144081334 S11 | DIAPH1      | 5.59E-08 | 1.00E+00 | 4.54E-05    | 2.79E-07 | 1 | 0.000355559 |
| phe.Fasting_rs9856270 | S8 | "FANCD2OS,Irs144613910 S8  | DIAPH1      | 3.42E-07 | 1.00E+00 | 2.34E-04    | 1.53E-06 | 1 | 0.00164527  |
| phe.Fasting_rs9856270 | S8 | "FANCD2OS,Irs145027704 S11 | DIAPH1      | 5.59E-08 | 1        | 4.54E-05    | 2.79E-07 | 1 | 0.000355559 |
| phe.Fasting_rs9856270 | S8 | "FANCD2OS,Irs146220673 S7  | DIAPH1      | 3.42E-07 | 1.00E+00 | 2.34E-04    | 1.53E-06 | 1 | 0.00164527  |
| phe.Fasting_rs9856270 | S8 | "FANCD2OS,Irs146622060 S13 | DIAPH1      | 5.59E-08 | 1        | 4.54E-05    | 2.79E-07 | 1 | 0.000355559 |
| phe.Fasting_rs9856270 | S8 | "FANCD2OS,Irs146878162 S7  | DIAPH1      | 3.42E-07 | 1        | 2.34E-04    | 1.53E-06 | 1 | 0.00164527  |
| phe.Fasting_rs9856270 | S8 | "FANCD2OS,Irs147314451 S8  | DIAPH1      | 3.42E-07 | 1        | 0.000233892 | 1.53E-06 | 1 | 0.00164527  |
| phe.Fasting_rs9856270 | S8 | "FANCD2OS,Irs147417996 S7  | DIAPH1      | 5.59E-08 | 1        | 4.54E-05    | 2.79E-07 | 1 | 0.000355559 |
| phe.Fasting_rs9856270 | S8 | "FANCD2OS,Irs147506725 S21 | "PCDHGA1,Pi | 4.65E-07 | 1.00E+00 | 3.07E-04    | 3.29E-06 | 1 | 0.00317534  |
| phe.Fasting_rs9856270 | S8 | "FANCD2OS,Irs147646948 S7  | "LOC1005056 | 3.42E-07 | 1        | 2.34E-04    | 1.53E-06 | 1 | 0.00164527  |
| phe.Fasting_rs9856270 | S8 | "FANCD2OS,Irs147677041 S8  | DIAPH1      | 5.59E-08 | 1        | 4.54E-05    | 2.68E-07 | 1 | 0.000343099 |
| phe.Fasting_rs9856270 | S8 | "FANCD2OS,Irs148116628 S7  | DIAPH1      | 3.42E-07 | 1        | 0.000233892 | 1.53E-06 | 1 | 0.00164527  |
| phe.Fasting_rs9856270 | S8 | "FANCD2OS,Irs148423011 S7  | DIAPH1      | 3.42E-07 | 1        | 0.000233892 | 1.53E-06 | 1 | 0.00164527  |
| phe.Fasting_rs9856270 | S8 | "FANCD2OS,Irs149019627 S8  | DIAPH1      | 5.59E-08 | 1        | 4.54E-05    | 2.68E-07 | 1 | 0.000343099 |
| phe.Fasting_rs9856270 | S8 | "FANCD2OS,Irs149075406 S8  | DIAPH1      | 3.42E-07 | 1        | 2.34E-04    | 1.53E-06 | 1 | 0.00164527  |
| phe.Fasting_rs9856270 | S8 | "FANCD2OS,Irs149334783 S8  | DIAPH1      | 3.42E-07 | 1        | 2.34E-04    | 1.53E-06 | 1 | 0.00164527  |
| phe.Fasting_rs9856270 | S8 | "FANCD2OS,Irs149553852 S21 | "PCDHGA10,I | 4.65E-07 | 1        | 3.07E-04    | 3.29E-06 | 1 | 0.00317534  |
| phe.Fasting_rs9856270 | S8 | "FANCD2OS,Irs149716949 S5  | DIAPH1      | 3.50E-08 | 1        | 2.96E-05    | 3.03E-07 | 1 | 0.00038264  |
| phe.Fasting_rs9856270 | S8 | "FANCD2OS,Irs149791570 S5  | DIAPH1      | 5.59E-08 | 1        | 4.54E-05    | 2.68E-07 | 1 | 0.000343099 |
| phe.Fasting_rs9856270 | S8 | "FANCD2OS,Irs150452206 S13 | "DIAPH1,LOC | 3.42E-07 | 1        | 2.34E-04    | 1.53E-06 | 1 | 0.00164527  |
| phe.Fasting_rs9856270 | S8 | "FANCD2OS,Irs150675915 S7  | DIAPH1      | 3.42E-07 | 1        | 2.34E-04    | 1.53E-06 | 1 | 0.00164527  |
| phe.Fasting_rs9856270 | S8 | "FANCD2OS,Irs150765570 S7  | DIAPH1      | 3.42E-07 | 1        | 2.34E-04    | 1.53E-06 | 1 | 0.00164527  |
| phe.Fasting_rs9856270 | S8 | "FANCD2OS,Irs150992994 S11 | "PCDHGA5,Pi | 3.55E-07 | 1.00E+00 | 2.42E-04    | 1.47E-06 | 1 | 0.0015908   |
| phe.Fasting_rs9856270 | S8 | "FANCD2OS,Irs151204700 S8  | DIAPH1      | 3.42E-07 | 1.00E+00 | 2.34E-04    | 1.53E-06 | 1 | 0.00164527  |
| phe.Fasting_rs9856270 | S8 | "FANCD2OS,Irs151330468 S8  | DIAPH1      | 5.59E-08 | 1.00E+00 | 4.54E-05    | 2.79E-07 | 1 | 0.000355559 |
| phe.Fasting_rs9856270 | S8 | "FANCD2OS,Irs180772028 S8  | "DIAPH1,LOC | 3.42E-07 | 1.00E+00 | 2.34E-04    | 1.53E-06 | 1 | 0.00164527  |
| phe.Fasting_rs9856270 | S8 | "FANCD2OS,Irs181224861 S7  | DIAPH1      | 3.42E-07 | 1.00E+00 | 2.34E-04    | 1.53E-06 | 1 | 0.00164527  |

|                            |     |                            |             |          |          |             |          |          |             |
|----------------------------|-----|----------------------------|-------------|----------|----------|-------------|----------|----------|-------------|
| phe.Fasting_rs9856270      | S8  | "FANCD2OS,Irs181247960 S21 | "PCDHGA9,PI | 4.65E-07 | 1.00E+00 | 3.07E-04    | 3.29E-06 | 1        | 0.00317534  |
| phe.Fasting_rs9856270      | S8  | "FANCD2OS,Irs181824655 S21 | "PCDHGB6,PI | 4.65E-07 | 1.00E+00 | 3.07E-04    | 3.29E-06 | 1        | 0.00317534  |
| phe.Fasting_rs9856270      | S8  | "FANCD2OS,Irs182714699 S8  | DIAPH1      | 3.42E-07 | 1.00E+00 | 2.34E-04    | 1.53E-06 | 1        | 0.00164527  |
| phe.Fasting_rs9856270      | S8  | "FANCD2OS,Irs182958142 S8  | DIAPH1      | 1.91E-07 | 1        | 0.000136481 | 5.38E-06 | 1        | 0.00487465  |
| phe.Fasting_rs9856270      | S8  | "FANCD2OS,Irs182965141 S8  | DIAPH1      | 7.66E-08 | 1.00E+00 | 5.99E-05    | 2.83E-06 | 1        | 0.00278387  |
| phe.Fasting_rs9856270      | S8  | "FANCD2OS,Irs183597049 S7  | DIAPH1      | 3.42E-07 | 1        | 2.34E-04    | 1.53E-06 | 1        | 0.00164527  |
| phe.Fasting_rs9856270      | S8  | "FANCD2OS,Irs183980988 S2  | NA          | 3.42E-07 | 1        | 2.34E-04    | 1.53E-06 | 1        | 0.00164527  |
| phe.Fasting_rs9856270      | S8  | "FANCD2OS,Irs184233232 S7  | DIAPH1      | 3.42E-07 | 1        | 0.000233892 | 1.53E-06 | 1        | 0.00164527  |
| phe.Fasting_rs9856270      | S8  | "FANCD2OS,Irs184509477 S13 | "PCDHGB4,PI | 3.42E-07 | 1        | 0.000233892 | 1.53E-06 | 1        | 0.00164527  |
| phe.Fasting_rs9856270      | S8  | "FANCD2OS,Irs185069296 S15 | "LOC1005056 | 3.42E-07 | 1.00E+00 | 2.34E-04    | 1.53E-06 | 1        | 0.00164527  |
| phe.Fasting_rs9856270      | S8  | "FANCD2OS,Irs185502834 S8  | DIAPH1      | 5.59E-08 | 1        | 4.54E-05    | 2.68E-07 | 1        | 0.000343099 |
| phe.Fasting_rs9856270      | S8  | "FANCD2OS,Irs185759881 S7  | DIAPH1      | 3.42E-07 | 1        | 0.000233892 | 1.53E-06 | 1        | 0.00164527  |
| phe.Fasting_rs9856270      | S8  | "FANCD2OS,Irs186288044 S21 | "PCDHGB4,PI | 4.65E-07 | 1        | 0.000307369 | 3.29E-06 | 1        | 0.00317534  |
| phe.Fasting_rs9856270      | S8  | "FANCD2OS,Irs187000011 S11 | DIAPH1      | 3.42E-07 | 1        | 0.000233892 | 1.53E-06 | 1        | 0.00164527  |
| phe.Fasting_rs9856270      | S8  | "FANCD2OS,Irs188981295 S5  | "RPS27AP10, | 3.42E-07 | 1        | 2.34E-04    | 1.53E-06 | 1        | 0.00164527  |
| phe.Fasting_rs9856270      | S8  | "FANCD2OS,Irs190559574 S7  | DIAPH1      | 5.59E-08 | 1        | 4.54E-05    | 2.68E-07 | 1        | 0.000343099 |
| phe.Fasting_rs9856270      | S8  | "FANCD2OS,Irs191544043 S8  | DIAPH1      | 3.42E-07 | 1        | 2.34E-04    | 1.53E-06 | 1        | 0.00164527  |
| phe.Fasting_rs9856270      | S8  | "FANCD2OS,Irs191766712 S7  | DIAPH1      | 3.42E-07 | 1        | 2.34E-04    | 1.53E-06 | 1        | 0.00164527  |
| phe.Fasting_rs9856270      | S8  | "FANCD2OS,Irs192690040 S7  | DIAPH1      | 3.42E-07 | 1        | 2.34E-04    | 1.53E-06 | 1        | 0.00164527  |
| phe.Fasting_rs9856270      | S8  | "FANCD2OS,Irs192765219 S7  | DIAPH1      | 3.42E-07 | 1        | 2.34E-04    | 1.53E-06 | 1        | 0.00164527  |
| phe.Fasting_rs9856270      | S8  | "FANCD2OS,Irs192770525 S7  | DIAPH1      | 3.42E-07 | 1        | 2.34E-04    | 1.53E-06 | 1        | 0.00164527  |
| phe.Fasting_rs9856270      | S8  | "FANCD2OS,Irs35990401 S7   | DIAPH1      | 2.58E-07 | 1        | 1.80E-04    | 5.33E-07 | 1        | 0.000634287 |
| phe.Fasting_rs9856270      | S8  | "FANCD2OS,Irs3856797 S12   | VGLL4       | 1.96E-05 | 1        | 8.20E-03    | 7.95E-07 | 1        | 0.000916008 |
| phe.Fasting_rs9856270      | S8  | "FANCD2OS,Irs55900860 S7   | DIAPH1      | 5.59E-08 | 1.00E+00 | 4.54E-05    | 2.68E-07 | 1        | 0.000343099 |
| phe.Fasting_rs9856270      | S8  | "FANCD2OS,Irs57503635 S3   | NA          | 2.81E-09 | 1.15E-01 | 2.88E-06    | 4.38E-17 | 1.78E-09 | 3.55E-12    |
| phe.Fasting_rs9856270      | S8  | "FANCD2OS,Irs79517926 S15  | "DIAPH1,LOC | 7.62E-08 | 1.00E+00 | 5.96E-05    | 2.76E-06 | 1        | 0.00271962  |
| phe.Fasting_rs987620       | S18 | NA rs77845645 S21          | NA          | 2.03E-06 | 1.00E+00 | 1.14E-03    | 3.89E-14 | 1.58E-06 | 2.77E-10    |
| phe.Fasting_rs999375       | S5  | MTX2 rs116011837 S9        | BRD2        | 1.54E-05 | 1.00E+00 | 6.65E-03    | 5.68E-06 | 1        | 0.00508148  |
| phe.Fasting_rs999375       | S5  | MTX2 rs116120727 S9        | BRD2        | 1.54E-05 | 1.00E+00 | 6.65E-03    | 5.68E-06 | 1        | 0.00508148  |
| phe.High_De rs116011837 S9 |     | BRD2 rs10269829 S21        | ZNF735      | 3.02E-06 | 1.00E+00 | 1.59E-03    | 6.73E-07 | 1        | 0.000787656 |
| phe.High_De rs116011837 S9 |     | BRD2 rs116722142 S21       | NA          | 1.01E-05 | 1.00E+00 | 4.62E-03    | 7.93E-07 | 1        | 0.000913986 |
| phe.High_De rs116011837 S9 |     | BRD2 rs139785207 S21       | NA          | 1.01E-05 | 1        | 0.00459983  | 8.14E-07 | 1        | 0.00093599  |
| phe.High_De rs116011837 S9 |     | BRD2 rs1987396 S21         | ZNF679      | 4.61E-06 | 1.00E+00 | 2.32E-03    | 2.48E-07 | 1        | 0.000320956 |
| phe.High_De rs116011837 S9 |     | BRD2 rs282891 S21          | NA          | 1.25E-05 | 1        | 5.55E-03    | 7.14E-07 | 1        | 0.000830729 |
| phe.High_De rs116011837 S9 |     | BRD2 rs282894 S21          | LOC653435   | 3.69E-06 | 1        | 1.90E-03    | 7.77E-07 | 1        | 0.000896463 |
| phe.High_De rs116011837 S9 |     | BRD2 rs282895 S21          | LOC653435   | 3.69E-06 | 1        | 0.00190376  | 7.77E-07 | 1        | 0.000896463 |
| phe.High_De rs116011837 S9 |     | BRD2 rs6460117 S21         | NA          | 1.74E-06 | 1        | 0.000989772 | 7.00E-07 | 1        | 0.000815457 |
| phe.High_De rs116011837 S9 |     | BRD2 rs6460122 S21         | VN1R38P     | 1.76E-06 | 1.00E+00 | 1.00E-03    | 3.09E-07 | 1        | 0.000388517 |
| phe.High_De rs116011837 S9 |     | BRD2 rs6973676 S21         | NA          | 1.74E-06 | 1        | 9.90E-04    | 7.00E-07 | 1        | 0.000815457 |
| phe.High_De rs116120727 S9 |     | BRD2 rs10269829 S21        | ZNF735      | 3.02E-06 | 1        | 0.0015923   | 6.73E-07 | 1        | 0.000787656 |

|                             |        |                 |           |          |            |            |          |          |             |
|-----------------------------|--------|-----------------|-----------|----------|------------|------------|----------|----------|-------------|
| phe.High_De rs116120727 S9  | BRD2   | rs116722142 S21 | NA        | 1.01E-05 | 1          | 0.00462253 | 7.93E-07 | 1        | 0.000913986 |
| phe.High_De rs116120727 S9  | BRD2   | rs139785207 S21 | NA        | 1.01E-05 | 1          | 0.00459983 | 8.14E-07 | 1        | 0.00093599  |
| phe.High_De rs116120727 S9  | BRD2   | rs1987396 S21   | ZNF679    | 4.61E-06 | 1          | 2.32E-03   | 2.48E-07 | 1        | 0.000320956 |
| phe.High_De rs116120727 S9  | BRD2   | rs282891 S21    | NA        | 1.25E-05 | 1          | 5.55E-03   | 7.14E-07 | 1        | 0.000830729 |
| phe.High_De rs116120727 S9  | BRD2   | rs282894 S21    | LOC653435 | 3.69E-06 | 1          | 1.90E-03   | 7.77E-07 | 1        | 0.000896463 |
| phe.High_De rs116120727 S9  | BRD2   | rs282895 S21    | LOC653435 | 3.69E-06 | 1          | 1.90E-03   | 7.77E-07 | 1        | 0.000896463 |
| phe.High_De rs116120727 S9  | BRD2   | rs6460117 S21   | NA        | 1.74E-06 | 1          | 9.90E-04   | 7.00E-07 | 1        | 0.000815457 |
| phe.High_De rs116120727 S9  | BRD2   | rs6460122 S21   | VN1R38P   | 1.76E-06 | 1          | 1.00E-03   | 3.09E-07 | 1        | 0.000388517 |
| phe.High_De rs116120727 S9  | BRD2   | rs6973676 S21   | NA        | 1.74E-06 | 1          | 9.90E-04   | 7.00E-07 | 1        | 0.000815457 |
| phe.High_De rs116722142 S21 | NA     | rs10269829 S21  | ZNF735    | 1.20E-09 | 0.0489921  | 1.30E-06   | 1.05E-05 | 1        | 0.00850454  |
| phe.High_De rs116722142 S21 | NA     | rs139107543 S8  | CEP250    | 5.46E-06 | 1          | 2.69E-03   | 4.32E-06 | 1        | 0.00403553  |
| phe.High_De rs116722142 S21 | NA     | rs143871275 S7  | CEP250    | 1.47E-05 | 1.00E+00   | 6.38E-03   | 4.52E-06 | 1        | 0.00419681  |
| phe.High_De rs116722142 S21 | NA     | rs282894 S21    | LOC653435 | 5.94E-11 | 2.43E-03   | 7.98E-08   | 9.50E-06 | 1        | 0.00782811  |
| phe.High_De rs116722142 S21 | NA     | rs282895 S21    | LOC653435 | 5.94E-11 | 2.43E-03   | 7.98E-08   | 9.50E-06 | 1        | 0.00782811  |
| phe.High_De rs116722142 S21 | NA     | rs6460117 S21   | NA        | 5.94E-11 | 2.43E-03   | 7.98E-08   | 9.50E-06 | 1        | 0.00782811  |
| phe.High_De rs116722142 S21 | NA     | rs6460122 S21   | VN1R38P   | 6.08E-11 | 2.48E-03   | 8.15E-08   | 4.19E-06 | 1        | 0.00392843  |
| phe.High_De rs116722142 S21 | NA     | rs6973676 S21   | NA        | 5.94E-11 | 2.43E-03   | 7.98E-08   | 9.50E-06 | 1        | 0.00782811  |
| phe.High_De rs116722142 S21 | NA     | rs8119454 S7    | NA        | 1.02E-05 | 1          | 4.67E-03   | 3.22E-06 | 1        | 3.11E-03    |
| phe.High_De rs11966232 S5   | ARID1B | rs61748998 S7   | PEPD      | 1.27E-08 | 0.517085   | 1.16E-05   | 1.59E-08 | 0.648088 | 2.80E-05    |
| phe.High_De rs139785207 S21 | NA     | rs10269829 S21  | ZNF735    | 1.22E-09 | 4.98E-02   | 1.32E-06   | 1.08E-05 | 1        | 0.00872202  |
| phe.High_De rs139785207 S21 | NA     | rs116722142 S21 | NA        | 8.96E-12 | 3.66E-04   | 1.48E-08   | 1.10E-05 | 1        | 0.00879776  |
| phe.High_De rs139785207 S21 | NA     | rs139107543 S8  | CEP250    | 5.45E-06 | 1          | 0.00268309 | 4.57E-06 | 1        | 0.00423285  |
| phe.High_De rs139785207 S21 | NA     | rs143871275 S7  | CEP250    | 1.47E-05 | 1          | 6.37E-03   | 4.76E-06 | 1        | 4.39E-03    |
| phe.High_De rs139785207 S21 | NA     | rs282894 S21    | LOC653435 | 6.07E-11 | 0.00247878 | 8.14E-08   | 9.80E-06 | 1        | 8.02E-03    |
| phe.High_De rs139785207 S21 | NA     | rs282895 S21    | LOC653435 | 6.07E-11 | 0.00247878 | 8.14E-08   | 9.80E-06 | 1        | 8.02E-03    |
| phe.High_De rs139785207 S21 | NA     | rs6460117 S21   | NA        | 6.07E-11 | 0.00247878 | 8.14E-08   | 9.80E-06 | 1        | 8.02E-03    |
| phe.High_De rs139785207 S21 | NA     | rs6460122 S21   | VN1R38P   | 6.21E-11 | 0.00253492 | 8.32E-08   | 4.34E-06 | 1        | 4.05E-03    |
| phe.High_De rs139785207 S21 | NA     | rs6973676 S21   | NA        | 6.07E-11 | 0.00247878 | 8.14E-08   | 9.80E-06 | 1        | 8.02E-03    |
| phe.High_De rs139785207 S21 | NA     | rs8119454 S7    | NA        | 1.02E-05 | 1          | 4.66E-03   | 3.40E-06 | 1        | 3.27E-03    |
| phe.High_De rs1987396 S21   | ZNF679 | rs139107543 S8  | CEP250    | 1.15E-05 | 1          | 5.18E-03   | 6.18E-06 | 1        | 5.46E-03    |
| phe.High_De rs1987396 S21   | ZNF679 | rs8119454 S7    | NA        | 2.21E-05 | 1          | 9.08E-03   | 5.61E-06 | 1        | 5.03E-03    |
| phe.High_De rs282891 S21    | NA     | rs116722142 S21 | NA        | 2.68E-11 | 0.0010939  | 3.85E-08   | 1.06E-05 | 1        | 8.60E-03    |
| phe.High_De rs282891 S21    | NA     | rs139107543 S8  | CEP250    | 6.58E-07 | 1          | 4.19E-04   | 3.63E-06 | 1        | 3.46E-03    |
| phe.High_De rs282891 S21    | NA     | rs139785207 S21 | NA        | 2.72E-11 | 0.00111164 | 3.91E-08   | 1.10E-05 | 1        | 8.80E-03    |
| phe.High_De rs282891 S21    | NA     | rs143871275 S7  | CEP250    | 1.83E-06 | 1          | 1.04E-03   | 3.73E-06 | 1        | 3.55E-03    |
| phe.High_De rs282891 S21    | NA     | rs282894 S21    | LOC653435 | 1.62E-09 | 0.0661374  | 1.72E-06   | 9.50E-06 | 1        | 7.83E-03    |
| phe.High_De rs282891 S21    | NA     | rs282895 S21    | LOC653435 | 1.62E-09 | 6.61E-02   | 1.72E-06   | 9.50E-06 | 1        | 0.00782811  |
| phe.High_De rs282891 S21    | NA     | rs6460117 S21   | NA        | 8.81E-10 | 0.0359776  | 9.72E-07   | 8.46E-06 | 1        | 7.13E-03    |
| phe.High_De rs282891 S21    | NA     | rs6460122 S21   | VN1R38P   | 9.01E-10 | 0.0368108  | 9.93E-07   | 3.99E-06 | 1        | 0.00375787  |
| phe.High_De rs282891 S21    | NA     | rs6973676 S21   | NA        | 8.81E-10 | 0.0359776  | 9.72E-07   | 8.46E-06 | 1        | 0.00712749  |



|                        |     |           |             |     |           |          |             |            |          |   |            |
|------------------------|-----|-----------|-------------|-----|-----------|----------|-------------|------------|----------|---|------------|
| phe.High_De rs282891   | S21 | NA        | rs8119454   | S7  | NA        | 1.26E-06 | 1           | 7.47E-04   | 2.71E-06 | 1 | 2.68E-03   |
| phe.High_De rs282894   | S21 | LOC653435 | rs10269829  | S21 | ZNF735    | 1.22E-11 | 0.000497433 | 1.90E-08   | 9.66E-06 | 1 | 0.00793132 |
| phe.High_De rs282894   | S21 | LOC653435 | rs139107543 | S8  | CEP250    | 8.49E-06 | 1           | 3.97E-03   | 5.35E-06 | 1 | 4.85E-03   |
| phe.High_De rs282894   | S21 | LOC653435 | rs143871275 | S7  | CEP250    | 2.26E-05 | 1           | 9.27E-03   | 5.66E-06 | 1 | 5.07E-03   |
| phe.High_De rs282894   | S21 | LOC653435 | rs6460117   | S21 | NA        | 1.26E-11 | 0.000516427 | 1.97E-08   | 9.57E-06 | 1 | 7.88E-03   |
| phe.High_De rs282894   | S21 | LOC653435 | rs6460122   | S21 | VN1R38P   | 1.30E-11 | 0.000530076 | 2.02E-08   | 4.18E-06 | 1 | 3.91E-03   |
| phe.High_De rs282894   | S21 | LOC653435 | rs6973676   | S21 | NA        | 1.26E-11 | 0.000516427 | 1.97E-08   | 9.57E-06 | 1 | 7.88E-03   |
| phe.High_De rs282894   | S21 | LOC653435 | rs8119454   | S7  | NA        | 1.64E-05 | 1           | 0.0069899  | 3.91E-06 | 1 | 0.00369217 |
| phe.High_De rs282895   | S21 | LOC653435 | rs10269829  | S21 | ZNF735    | 1.22E-11 | 4.97E-04    | 1.90E-08   | 9.66E-06 | 1 | 0.00793132 |
| phe.High_De rs282895   | S21 | LOC653435 | rs139107543 | S8  | CEP250    | 8.49E-06 | 1           | 3.97E-03   | 5.35E-06 | 1 | 4.85E-03   |
| phe.High_De rs282895   | S21 | LOC653435 | rs143871275 | S7  | CEP250    | 2.26E-05 | 1           | 9.27E-03   | 5.66E-06 | 1 | 5.07E-03   |
| phe.High_De rs282895   | S21 | LOC653435 | rs282894    | S21 | LOC653435 | 1.26E-11 | 0.000516427 | 1.97E-08   | 9.57E-06 | 1 | 7.88E-03   |
| phe.High_De rs282895   | S21 | LOC653435 | rs6460117   | S21 | NA        | 1.26E-11 | 0.000516427 | 1.97E-08   | 9.57E-06 | 1 | 7.88E-03   |
| phe.High_De rs282895   | S21 | LOC653435 | rs6460122   | S21 | VN1R38P   | 1.30E-11 | 0.000530076 | 2.02E-08   | 4.18E-06 | 1 | 3.91E-03   |
| phe.High_De rs282895   | S21 | LOC653435 | rs6973676   | S21 | NA        | 1.26E-11 | 0.000516427 | 1.97E-08   | 9.57E-06 | 1 | 0.00788036 |
| phe.High_De rs282895   | S21 | LOC653435 | rs8119454   | S7  | NA        | 1.64E-05 | 1           | 6.99E-03   | 3.91E-06 | 1 | 3.69E-03   |
| phe.High_De rs57987466 | S2  | MAPKAPK3  | rs6460122   | S21 | VN1R38P   | 2.39E-05 | 1           | 9.71E-03   | 6.68E-06 | 1 | 5.83E-03   |
| phe.High_De rs61032466 | S17 | MAPKAPK3  | rs6460122   | S21 | VN1R38P   | 2.39E-05 | 1           | 0.00971356 | 6.68E-06 | 1 | 0.00582886 |
| phe.High_De rs6460117  | S21 | NA        | rs139107543 | S8  | CEP250    | 3.33E-06 | 1           | 0.00173914 | 4.51E-06 | 1 | 0.00418916 |
| phe.High_De rs6460117  | S21 | NA        | rs143871275 | S7  | CEP250    | 9.29E-06 | 1           | 4.29E-03   | 4.68E-06 | 1 | 4.33E-03   |
| phe.High_De rs6460117  | S21 | NA        | rs6460122   | S21 | VN1R38P   | 5.60E-12 | 0.000228631 | 9.87E-09   | 3.94E-06 | 1 | 3.71E-03   |
| phe.High_De rs6460117  | S21 | NA        | rs6973676   | S21 | NA        | 5.45E-12 | 0.000222466 | 9.62E-09   | 8.58E-06 | 1 | 7.20E-03   |
| phe.High_De rs6460117  | S21 | NA        | rs8119454   | S7  | NA        | 6.61E-06 | 1           | 3.19E-03   | 3.29E-06 | 1 | 3.18E-03   |
| phe.High_De rs6460122  | S21 | VN1R38P   | rs10269829  | S21 | ZNF735    | 5.43E-12 | 0.000221844 | 9.60E-09   | 8.04E-06 | 1 | 6.81E-03   |
| phe.High_De rs6973676  | S21 | NA        | rs139107543 | S8  | CEP250    | 3.33E-06 | 1           | 1.74E-03   | 4.51E-06 | 1 | 4.19E-03   |
| phe.High_De rs6973676  | S21 | NA        | rs143871275 | S7  | CEP250    | 9.29E-06 | 1           | 4.29E-03   | 4.68E-06 | 1 | 4.33E-03   |
| phe.High_De rs6973676  | S21 | NA        | rs6460122   | S21 | VN1R38P   | 5.60E-12 | 0.000228631 | 9.87E-09   | 3.94E-06 | 1 | 0.00371383 |
| phe.High_De rs6973676  | S21 | NA        | rs8119454   | S7  | NA        | 6.61E-06 | 1           | 3.19E-03   | 3.29E-06 | 1 | 3.18E-03   |
| phe.High_De rs73833239 | S23 | DOCK3     | rs6460122   | S21 | VN1R38P   | 2.17E-05 | 1           | 8.95E-03   | 8.21E-06 | 1 | 6.94E-03   |
| phe.High_De rs78973717 | S21 | DOCK3     | rs6460122   | S21 | VN1R38P   | 1.80E-05 | 1           | 7.60E-03   | 8.69E-06 | 1 | 7.27E-03   |
